# Supplementary material for: Hydrolyzing NAD to NMN and AMP by SelO is Required for Mitochondria Homeostasis
Source: Research Square preprint supplement (doi:10.21203/rs.3.rs-5137152/v1), 2024-10-17
Supplement: Supplementary file 1 [file 262b857c3b3169d68df4758f.xlsx]

## Sheet: pos
ID	m/z	rt(s)	Name	adduct	HMDB	KEGG	SuperClass	Class	SubClass	shCon-1	shCon-2	shCon-3	shCon-4	shCon-5	shCon-6	shSelO-1	shSelO-2	shSelO-3	shSelO-4	shSelO-5	shSelO-6	QC-2	QC-3	QC-1
M205T429	205.083	428.624	.alpha.-L-Glu-Gly	[M+H]+	HMDB0028819		Organic acids and derivatives	Carboxylic acids and derivatives	Amino acids, peptides, and analogues	447757	476808	513359	429789	446303	497506	490806	636874	493758	703613	458284	816546	590214	577478	590459
M536T174	536.403	173.732	.alpha.-tocopherol nicotinate	[M+H]+		C12981	Lipids and lipid-like molecules	Prenol lipids	Quinone and hydroquinone lipids	39062.4	47142.4	35723.9	2341.47	2208.9	28721.2	19867.1	12955.1	9320.08	9072.85	4818.23	1784.5	7372.72	7450.44	8209.19
M194T213	194.115	213.039	.beta.-asarone	[M+H-CH3]+		C10430	Benzenoids	Phenol ethers	Anisoles	18044.8	23904.8	31592.4	18416.9	17699.7	12044.1	16685.5	7026.67	17355.1	67912	7530.52	38147.4	39004.5	24261.6	38591.4
M198T37	198.184	36.767	.beta.-Citronellol	(M+CH3CN+H)+						80304.1	47862.3	118747	28538.7	40386.3	101452	89002.4	63464.7	39512.6	44445.5	37529.1	23672.7	70722.2	69627.4	69630
M486T430	486.227	430.104	.beta.-d-glucopyranosiduronic acid, 5-[3-[(2,2,3,3-tetramethylcyclopropyl)carbonyl]-1h-indol-1-yl]pentyl	[M+H-H2O]+			Lipids and lipid-like molecules	Fatty Acyls	Fatty acyl glycosides	5268.49	7117.17	6463.53	2074.91	4391.13	5475.05	7681.83	14212.3	11365.2	13944.4	8419.11	16258.4	12468.7	12251.2	12251.3
M586T491	586.193	490.607	.beta.-d-glucopyranosiduronic acid, 6-[3-(1-naphthalenylcarbonyl)-1h-indol-1-yl]hexyl	[M+K]+			Organoheterocyclic compounds	Indoles and derivatives	Naphthoylindoles	1492.13	1180.02	1559.71	206.387	1118.37	1232.56	1983.45	2766.26	3371.49	3791.44	2189.28	2999.69	2436.01	2269.96	2435.29
M357T525	357.249	524.8	.beta.-estradiol 17-valerate	[M+H]+		C12859	Lipids and lipid-like molecules	Steroids and steroid derivatives	Steroid esters	218254	209227	161101	47572.1	165227	219160	161176	368505	263677	351535	178953	504230	367766	359601	367519
M130T260	130.064	260.03	.beta.-homoproline	[M+H]+						25733.4	25402.7	25248.6	9878.92	19758.2	27223.1	21514.2	35583.7	26402.7	38465.4	21662.1	43135.9	40145.2	40061.2	39746.2
M187T226	187.038	226.478	.beta.-lapachone	[M+H-C4H8]+		C10367	Organoheterocyclic compounds	Naphthopyrans	Naphthopyranones	8991.5	7333.76	7135.91	10273.5	9355.63	12046.6	11026.1	6378.62	9197.23	5910.28	10328.2	4603.98	5365.07	5496.75	4873.26
M145T45	145.075	45.246	.beta.-naphthol	[M+H]+	HMDB0012322	C11713	Benzenoids	Naphthalenes	Naphthols and derivatives	11056.7	8144.81	12043.7	17851.2	83767.3	41951.2	18936.4	5412.83	21756.9	23716.7	22621.6	29055.5	26388.1	26546.4	26387.2
M744T497	744.077	497.462	.beta.-nicotinamide adenine dinucleotide phosphate	[M+H]+	HMDB0000221	C00006				8292.18	5039.58	6178.12	1494.35	4925.74	6477.6	8538.77	14454.4	7114.43	6519.53	5880.76	8836.16	8532.04	8716.48	8736.44
M688T413	688.11	413.347	.beta.-nicotinamide adenine dinucleotide, reduced(NADH)	[M+Na]+	HMDB0001487	C00004				8110.56	9466.77	7668.85	283.632	1299.76	3640.56	6825.74	32379.8	10954.2	14044.3	2838.5	25487.9	20549	20332.2	20334.2
M227T36_1	227.163	36.0965	.epsilon.-caprolactam	[2M+H]+	HMDB0062769	C06593	Organoheterocyclic compounds	Lactams	Caprolactams	99306.4	60477.7	108147	40053.3	47785.7	148319	105277	79802.1	80938.6	56048	40623.5	55533.4	74031	74998.6	74016.4
M180T39	180.101	39.366	.gamma.-aminobutyric acid	[M+2K-H]+	HMDB0000112	C00334	Organic acids and derivatives	Carboxylic acids and derivatives	Amino acids, peptides, and analogues	99619.1	103036	86930.7	64183.9	282621	6163.98	319604	238769	336595	249991	354313	456715	252533	252521	245076
M291T382	291.118	382.156	.gamma.-glutamyl-(s)-allyl-l-cysteine	[M+H]+			Organic acids and derivatives	Carboxylic acids and derivatives	Amino acids, peptides, and analogues	2194.25	3108.44	2056.16	1435.01	3662.61	3163.62	4648.87	7665.5	2929.42	13597.8	2958.59	10135.2	6080.65	6080.52	6252.13
M276T467	276.154	466.604	.gamma.-l-glu-.epsilon.-l-lys	[M+H]+	HMDB0003869	C21730	Organic acids and derivatives	Carboxylic acids and derivatives	Amino acids, peptides, and analogues	26566.2	19856.2	17637	4674.98	18710.3	26685.6	23103.4	72258.9	41447.3	65615.2	32565.4	54304.3	51711.6	51329	51713.2
M399T278	399.11	278.258	(-)-riboflavin	[M+Na]+	HMDB0000244	C00255	Organoheterocyclic compounds	Pteridines and derivatives	Alloxazines and isoalloxazines	113077	132653	123788	13734.6	106097	111311	104242	34796.1	96389.5	51261.7	87721.1	12904.7	69969	66323.2	66382.2
M112T109	112.027	109.079	(-)-sulforaphene	[M+H-CH4OS]+	HMDB0031573					13393.7	23521	19815.4	6964.92	24418.9	19682.3	2007.59	28919.7	3199.38	37758.4	23040.3	45824	15769.5	15936	12271.8
M357T416	357.007	415.915	(2,4,5-trichlorophenoxy)acetic acid, butoxyethyl ester	[M+H+2i]+			Benzenoids	Benzene and substituted derivatives	Phenoxyacetic acid derivatives	5816.28	1394.78	4861.03	2190.92	4822.55	3981.63	5964.27	13649.1	5413.45	16626.9	24955.4	1609.39	24149.1	24870.4	24159.6
M501T462	501.243	462.193	(2r,4'ar,5's,6'r,6'as,10'ar,10'br)-6'-(acetyloxy)-4'a,6'a,10'b-trimethyl-5''-oxo-decahydro-1'h-dispiro[oxirane-2,7'-naphtho[2,1-b]pyran-3',3''-oxolane]-5'-yl 2-methylpropanoate	[M+Na]+						1237.23	5547.98	2734.26	6642.92	5959.45	2195.36	1307.94	2449.29	5342.87	6792.77	6273.9	8051.58	3364.1	3197.35	4412.74
M257T241	257.074	240.743	(2r)-5-methoxy-2-methyl-2,3,8,9-tetrahydrofuro[2,3-h]chromen-4-one	[M+Na]+			Organoheterocyclic compounds	Benzopyrans	1-benzopyrans	6358.1	394.362	375.011	432.734	1558.3	2018.74	5852.67	52341.4	15102.9	41264.9	378.155	28717.5	32512.6	33828.6	32639.2
M517T383	517.306	383.44	(2s,3r,5r,10r,13r,14s,17s)-2,3,14-trihydroxy-10,13-dimethyl-17-[(2r,3r,5r)-2,3,6-trihydroxy-5,6-dimethylheptan-2-yl]-2,3,4,5,9,11,12,15,16,17-decahydro-1h-cyclopenta[a]phenanthren-6-one	[M+Na]+			Lipids and lipid-like molecules	Steroids and steroid derivatives	Bile acids, alcohols and derivatives	488.428	568.565	1075.5	289.395	793.696	1092.95	2489.89	2529.99	1008.87	4021.69	1656.98	2657.68	1852.23	1866.31	1866.36
M335T445	335.072	445.024	(2s,3s)-3,5,7-trihydroxy-6-methyl-2-(3,4,5-trihydroxyphenyl)-2,3-dihydrochromen-4-one	[M+H]+			Phenylpropanoids and polyketides	Flavonoids	Flavans	107469	96401.6	109587	20696.4	100287	113654	103599	191582	140587	188645	98671.9	244397	171553	171553	170989
M253T216	253.104	216.011	(2s)-2-[(1s,2r)-1,2-dihydroxypentyl]-4-methoxy-2,3-dihydropyran-6-one	[M+Na]+			Organoheterocyclic compounds	Pyrans	Pyranones and derivatives	18733.5	26861.1	5525.85	1663.7	20399.3	15867.1	12929.1	629.328	4375.24	434.841	6057.51	268.212	319.362	300.905	300.829
M571T427_3	571.318	426.526	(3r,5r,6r,7s,9s,10r,13r,17r)-17-((r)-5-methoxy-5-oxopentan-2-yl)-10,13-dimethylhexadecahydro-1h-cyclopenta[a]phenanthrene-3,6,7-triyl triacetate	[M+Na]+			Lipids and lipid-like molecules	Steroids and steroid derivatives	Bile acids, alcohols and derivatives	7124.07	7020.57	11487.3	2722.6	7629.5	8918.97	13151.2	28080	13048	27006.1	8305.07	37922.6	21494.2	21510.4	19698.6
M804T34	803.539	33.73	(4r)-4-((5s,7r,9s,10s,13r,14s,17r)-7-hydroxy-10,13-dimethyl-3-oxohexadecahydro-1h-cyclopenta[a]phenanthren-17-yl)pentanoic acid	[2M+Na]+			Lipids and lipid-like molecules	Steroids and steroid derivatives	Bile acids, alcohols and derivatives	432349	354676	466070	187748	132949	410807	364764	447091	150632	300575	138377	189574	469710	450408	469879
M382T410	382.12	409.574	(5e)-4-methyl-5-{[(phenylsulfonyl)oxy]imino}-1,1'-bi(cyclohexane)-3,6-dien-2-one	[M+Na]+			Benzenoids	Benzene and substituted derivatives	Benzenesulfonic acids and derivatives	2726.44	11888.7	2309.61	3020.2	10013.6	3565.46	3848.08	6686.08	3680.23	5822.48	2480.74	8683.72	5485.9	5524	5316.92
M247T252	247.092	251.502	(e,2s,3r)-5-[3-hydroxy-2-(hydroxymethyl)phenyl]pent-4-ene-2,3-diol	[M+Na]+						2839.38	3902.61	2711.8	2558.32	2376.37	3243.77	2326.61	7731.95	2826.32	5260.51	2330.13	6155.95	5462.98	6021.71	5457.88
M362T42	362.325	41.7345	(r)-(+)-arachidonyl-1'-hydroxy-2'-propylamide	[M+H]+			Lipids and lipid-like molecules	Fatty Acyls	Fatty amides	61295.8	78938.9	70570.7	23515.9	61800.2	109412	202920	448925	262062	465429	50642.2	440894	345616	345608	347414
M232T260	232.154	259.571	(r)-butyrylcarnitine	[M+H]+	HMDB0002013		Lipids and lipid-like molecules	Fatty Acyls	Fatty acid esters	1.76231e+06	1.56065e+06	1.81734e+06	338900	1.41643e+06	1.70945e+06	2.41475e+06	4.45851e+06	3.05879e+06	4.37506e+06	2.53266e+06	5.60036e+06	3.4998e+06	3.53797e+06	3.53798e+06
M212T37	212.17	36.777	(S)-(-)-Citronellic acid	(M+CH3CN+H)+	HMDB0035837	C16462	Lipids and lipid-like molecules	Prenol lipids	Monoterpenoids	14653.6	29877.2	15719.4	8549.47	17692.6	22513.9	20795.9	14188.1	16120.6	24390.3	11236	15305.5	16390.4	19364.9	16375.3
M699T396	699.378	395.772	[(2r,3r,4s,5s,6r)-3-acetyloxy-2-(acetyloxymethyl)-5-hexanoyloxy-6-[(2s,3r)-2,3,4-trihydroxybutoxy]oxan-4-yl] tetradecanoate	[M+Na]+						4026.28	8072.92	5299.8	541.282	4409.26	7783.6	3916.23	3459.8	4494.94	7123.04	5710.71	5109.41	5241.8	5738.13	5999.51
M935T421	935.479	421.399	[17-acetyl-3-[5-[5-(3,5-dihydroxy-4-methoxy-6-methyloxan-2-yl)oxy-4-methoxy-6-methyloxan-2-yl]oxy-4-methoxy-6-methyloxan-2-yl]oxy-8,14,17-trihydroxy-10,13-dimethyl-1,2,3,4,5,6,7,9,11,12,15,16-dodecahydrocyclopenta[a]phenanthren-12-yl] benzoate	[M+H]+			Lipids and lipid-like molecules	Steroids and steroid derivatives	Steroidal glycosides	3888.42	2352.21	1807.21	251.556	1153.59	1736.27	2069.15	10326.1	5152.99	4564.21	5275.98	7428.55	6117.4	6115.49	6370.63
M743T451	743.36	451.462	[2-[4-hydroxy-2,5-bis(hydroxymethyl)-3-(3-methylbutanoyloxy)oxolan-2-yl]oxy-6-(hydroxymethyl)-4,5-bis(2-methylpropanoyloxy)oxan-3-yl] decanoate	[M+Na]+						1274.93	1738.76	2477.41	635.24	1527.47	2106.16	2248.65	5947.15	2737.99	3445.68	1120.35	4536.18	4464.1	4754.46	4766.71
M358T66	358.243	66.399	[5-acetyloxy-3-(hydroxymethyl)-2-oxo-6-propan-2-ylcyclohex-3-en-1-yl] 3-methylpentanoate	[M+NH4]+			Lipids and lipid-like molecules	Prenol lipids	Monoterpenoids	13862.1	8263	10690.9	4487.16	12086.5	15140.5	11632.3	25307.8	19512.4	20094.7	12163.3	11122.8	15140.4	15236.7	16358.8
M252T130	252.156	129.512	[dala2] .alpha.-neo-endorphin (1-2), amide	[M+H]+			Organic acids and derivatives	Carboxylic acids and derivatives	Amino acids, peptides, and analogues	16789	8210.27	8043.64	3262.17	8060.04	7777.73	4161.2	251965	4098.57	113615	2674.39	230294	131509	125224	125222
M325T298	325.036	298.073	1-.beta.-d-arabinofuranosyluracil 5'-monophosphate	[M+H]+			Nucleosides, nucleotides, and analogues	Pyrimidine nucleotides	Pyrimidine ribonucleotides	2680.71	2911.52	3036.74	2322.4	2689.99	2855.91	2117.86	6502.26	2119.53	8447.41	2603.6	7411.02	4551.49	4549.67	4426.37
M480T183	480.342	182.983	1-(1z-hexadecenyl)-sn-glycero-3-phosphocholine	[M+H]+	HMDB0010407		Lipids and lipid-like molecules	Glycerophospholipids	Glycerophosphocholines	275977	275091	277057	30201.8	64297.1	281885	235769	253655	179866	177319	109279	28136.4	199229	202031	199215
M819T133	818.601	133.048	1-(1z-octadecenyl)-2-(4z,7z,10z,13z,16z,19z-docosahexaenoyl)-sn-glycero-3-phosphocholine	[M+H]+	HMDB0011262		Lipids and lipid-like molecules	Glycerophospholipids	Glycerophosphocholines	535057	612975	542236	227721	109369	489405	176505	87572.5	125011	61685.3	114660	117656	60008.3	64365.7	60737.5
M777T155	776.576	155.114	1-(1z-octadecenyl)-2-(4z,7z,10z,13z,16z,19z-docosahexaenoyl)-sn-glycero-3-phosphoethanolamine	[M+H]+						651926	699898	611820	107876	161998	526551	440338	109984	102388	91560.3	118091	102513	65823.9	70467.5	70454.3
M795T41_2	794.599	40.615	1-(1z-octadecenyl)-2-(5z,8z,11z,14z-eicosatetraenoyl)-sn-glycero-3-phosphocholine	[M+H]+	HMDB0011253		Lipids and lipid-like molecules	Glycerophospholipids	Glycerophosphocholines	994314	962043	938234	20465.1	33018.6	949013	468026	281239	114049	400282	43227.8	1.13124e+06	348804	342405	348761
M773T138	772.611	137.907	1-(1z-octadecenyl)-2-(9z-octadecenoyl)-sn-glycero-3-phosphocholine	[M+H]+	HMDB0011243		Lipids and lipid-like molecules	Glycerophospholipids	Glycerophosphocholines	3.34739e+06	3.40962e+06	3.06791e+06	1.26533e+06	955975	1.84519e+06	931327	786413	1.48407e+06	791244	1.4469e+06	1.20809e+06	418123	446434	447091
M508T195	508.373	195.289	1-(1z-octadecenyl)-sn-glycero-3-phosphocholine	[M+H]+	HMDB0013122		Lipids and lipid-like molecules	Glycerophospholipids	Glycerophosphocholines	253989	199016	210245	21502.9	40431	166600	140518	225230	142263	135778	126879	30701.7	178870	180131	180133
M383T29	383.181	28.81	1-(2,3-dibenzimidazol-2-ylpropyl)-2-methoxybenzene	[M+H]+						4459.38	5078.51	3253.6	1268.31	2970.64	3804.39	2509.96	3334.68	5018.19	4332.02	2186.29	3817.11	3865.63	3645.48	3652.93
M236T332	236.148	331.745	1-(benzo[d][1,3]dioxol-4-yl)-2-(methylamino)pentan-1-one	[M+H]+			Benzenoids	Benzene and substituted derivatives	Butyrophenones	6582.8	4076.16	2842.84	9305.55	7028.68	1977.52	5730.37	97.9142	3636.14	220.723	4437.55	2069.4	292.11	226.1	295.835
M516T425_2	516.189	424.898	1-[(4-chlorophenyl)methyl]-3-[(1,1-dimethylethyl)thio]-.alpha.,.alpha.- dimethyl-5-(1-methylethyl)-1h-indole-2-propanoic acid	[M-H+2Na]+			Organoheterocyclic compounds	Indoles and derivatives	N-alkylindoles	18726.7	19600.9	21404.2	1510.25	19631.8	20154.3	25469.8	35936.3	31441.4	37256.3	30281.2	38472	30212.1	28703.2	30191.5
M409T200	409.34	200.408	1-[1-(1-methylcyclooctyl)-4-piperidinyl]-2-[(3r)-3-piperidinyl]-1h-benzimidazole	[M+H]+						7519.02	8963.63	7131.13	512.928	2130.55	8049.86	5440.74	7842.04	11058.4	7353.1	2326.64	1133.72	8824.54	10071.7	8841.1
M102T363	102.054	363.262	1-amino-Cyclopropanecarboxylic acid	[M+H]+	HMDB0036458	C01234	Organic acids and derivatives	Carboxylic acids and derivatives	Amino acids, peptides, and analogues	183054	164774	194865	72948.4	155201	184699	144815	168884	118495	195965	139830	175619	130203	141949	130817
M84T405_2	84.044	405.347	1-Aminocyclopropanecarboxylic acid	(M+H-H2O)+	HMDB0036458	C01234	Organic acids and derivatives	Carboxylic acids and derivatives	"Amino acids, peptides, and analogues"	1.58235e+06	1.45002e+06	1.48886e+06	298706	1.36684e+06	1.61909e+06	1.33592e+06	2.19405e+06	1.61828e+06	2.18531e+06	1.53939e+06	2.56175e+06	2.12246e+06	2.11315e+06	2.12247e+06
M510T190	510.353	190.211	1-heptadecanoyl-sn-glycero-3-phosphocholine	[M+H]+	HMDB0012108		Lipids and lipid-like molecules	Glycerophospholipids	Glycerophosphocholines	67698.5	53614.5	56439.4	8344.92	18007.4	81903.7	69453.6	82698.8	49410.1	73160.4	30247.7	4093.01	66933.8	69198.5	69245.2
M759T141_1	758.568	140.946	1-hexadecanoyl-2-octadecadienoyl-sn-glycero-3-phosphocholine	[M+H]+			Lipids and lipid-like molecules	Glycerophospholipids	Glycerophosphocholines	2.52202e+07	2.60559e+07	3.04693e+07	1.37211e+07	1.18373e+07	2.99538e+07	1.94562e+07	9.67054e+06	2.96387e+07	7.63697e+06	1.62784e+07	1.13938e+07	5.37084e+06	5.70775e+06	5.61255e+06
M769T139	768.586	138.847	1-hexadecyl-2-(5z,8z,11z,14z-eicosatetraenoyl)-sn-glycero-3-phosphocholine	[M+H]+			Lipids and lipid-like molecules	Glycerophospholipids	Glycerophosphocholines	4.24548e+06	4.65306e+06	4.7144e+06	2.26298e+06	1.22754e+06	4.20419e+06	1.71713e+06	1.07631e+06	1.46967e+06	877979	1.59372e+06	1.3e+06	602620	644554	630002
M771T138	770.6	137.907	1-hexadecyl-2-(8z,11z,14z-eicosatrienoyl)-sn-glycero-3-phosphocholine	[M+H]+			Lipids and lipid-like molecules	Glycerophospholipids	Glycerophosphocholines	4.3146e+06	4.23998e+06	4.29931e+06	1.88458e+06	1.66995e+06	3.21053e+06	1.5062e+06	972166	1.54263e+06	930485	1.61052e+06	1.32838e+06	528543	559349	549747
M747T109	746.6	109.216	1-hexadecyl-2-(9z-octadecenoyl)-sn-glycero-3-phosphocholine	[M+H]+			Lipids and lipid-like molecules	Glycerophospholipids	Glycerophosphocholines	2.68657e+06	2.7177e+06	2.59976e+06	43966.4	2.07083e+06	1.35684e+06	4.9855e+06	208861	5.83501e+06	281338	2.96203e+06	534627	218481	218410	224915
M652T238	652.452	238.134	1-hexadecyl-2-azelaoyl-sn-glycero-3-phosphocholine	[M+H]+			Lipids and lipid-like molecules	Glycerophospholipids	Glycerophosphocholines	2907.64	364.487	426.537	172.092	922.714	1473.58	789.998	3615.37	152.129	2547.11	273.531	958.227	1791.65	1899.37	1744.5
M482T198_2	482.358	197.892	1-hexadecyl-sn-glycero-3-phosphocholine	[M+H]+			Lipids and lipid-like molecules	Glycerophospholipids	Glycerophosphocholines	621548	523882	607049	47704.8	79982.9	469276	444700	535895	312134	365196	166822	75135	443694	443690	442269
M136T351_2	136.047	351.33	1-hydroxybenzotriazole	[M+H]+						633618	654928	816484	130599	735176	993517	694869	933579	770567	1.18782e+06	657021	1.18431e+06	1.00998e+06	1.00542e+06	1.00539e+06
M620T204	619.525	204.046	1-linoleoyl-2-oleoyl-rac-glycerol	[M+H]+			Lipids and lipid-like molecules	Fatty Acyls	Lineolic acids and derivatives	2418.2	2276.69	1961.17	299.859	540.298	972.344	768.973	552.057	580.752	483.857	645.64	239.524	572.987	584.462	571.864
M282T132	282.118	131.621	1-methyladenosine	[M+H]+	HMDB0003331	C02494	Nucleosides, nucleotides, and analogues	Purine nucleosides		3889.85	5646.14	4754.85	4242.62	5792.93	14507.6	5312.27	47185.9	18243.9	36410.2	1772.36	65509.7	42008.3	42037.6	43715.3
M170T368	170.091	367.905	1-methylhistidine	[M+H]+	HMDB0000001	C01152	Organic acids and derivatives	Carboxylic acids and derivatives	Amino acids, peptides, and analogues	70291.8	61962.1	73018.1	11088.4	76895	80334.4	61796	102880	100326	113869	57301.5	146652	128357	128333	126064
M137T330_2	137.07	329.959	1-Methylnicotinamide	M+	HMDB0000699	C02918	Organoheterocyclic compounds	Pyridines and derivatives	Pyridinecarboxylic acids and derivatives	2.87724e+06	2.33299e+06	2.7353e+06	285164	2.49348e+06	1.84292e+06	3.64714e+06	1.69405e+06	4.07899e+06	2.19216e+06	3.96065e+06	362051	2.1702e+06	2.139e+06	2.13878e+06
M707T182	706.534	182.214	1-myristoyl-2-palmitoyl-sn-glycero-3-phosphocholine	[M+H]+	HMDB0007869		Lipids and lipid-like molecules	Glycerophospholipids	Glycerophosphocholines	23786.1	16419.2	20220.1	12907.6	66563.5	24449.3	31289.7	16846.1	69872.7	13973.1	102556	21151.5	12300.4	20310.9	17404.4
M468T198	468.306	197.528	1-myristoyl-sn-glycero-3-phosphocholine	[M+H]+	HMDB0010379		Lipids and lipid-like molecules	Glycerophospholipids	Glycerophosphocholines	281584	181319	293438	22748.3	138961	197035	152479	363357	246966	298267	132139	130339	352440	353196	351943
M550T189	550.384	188.522	1-O-(cis-9-Octadecenyl)-2-O-acetyl-sn-glycero-3-phosphocholine	M+						186543	183041	204057	20558.5	33303.3	215864	156532	165837	101591	103790	51805.7	21929.1	125073	127198	125131
M550T169	550.384	169.038	1-o-hexadecyl-2-o-(2e-butenoyl)-sn-glyceryl-3-phosphocholine	[M+H]+			Lipids and lipid-like molecules	Glycerophospholipids	Glycerophosphocholines	5818.61	4775.12	1553.74	17170.9	366.585	15485.7	12063.2	81360.3	9518.74	49823.2	2766.37	17861.1	61047.2	60925.9	58435.3
M793T40	792.583	40.298	1-o-hexadecyl-2-o-(4z,7z,10z,13z,16z,19z-docosahexaenoyl)-sn-glyceryl-3-phosphorylcholine	[M+H]+	HMDB0013409		Lipids and lipid-like molecules	Glycerophospholipids	Glycerophosphocholines	731588	717992	451003	110650	121537	573592	743808	213177	103923	264302	169817	620099	224049	223945	231643
M767T40_1	766.569	40.191	1-o-hexadecyl-2-o-(5z,8z,11z,14z,17z-eicosapentaenoyl)-sn-glyceryl-3-phosphorylcholine	[M+H]+			Lipids and lipid-like molecules	Glycerophospholipids	Glycerophosphocholines	488126	483164	506831	5065.33	57784.3	610787	126364	233385	40713.9	246701	63141	486543	217405	203366	217485
M184T498	184.072	498.409	1-o-hexadecyl-2-o-acetyl-sn-glyceryl-3-phosphorylcholine	[M+H-C21H40O3]+	HMDB0062195		Lipids and lipid-like molecules	Glycerophospholipids	Glycerophosphocholines	2.68545e+06	1.69696e+06	1.48383e+06	143736	1.375e+06	1.37665e+06	800981	1.16521e+06	576941	442547	526049	988966	1.77106e+06	1.7628e+06	1.7628e+06
M811T139	810.596	138.847	1-octadecanoyl-2-octadecenoyl-sn-glycero-3-phosphocholine	[M+Na]+			Lipids and lipid-like molecules	Glycerophospholipids	Glycerophosphocholines	2.24121e+06	2.35202e+06	2.2869e+06	1.07561e+06	1.1251e+06	2.08486e+06	888935	532483	819532	479745	2.18347e+06	851625	323123	359878	328000
M184T281	184.096	281.376	1-octadecyl-2-acetyl-sn-glycero-3-phosphocholine	[M+H-C23H44O3]+			Lipids and lipid-like molecules	Glycerophospholipids	Glycerophosphocholines	86602.7	83600.8	87214.5	13668.2	84651.9	84531.6	92422.8	14772.7	86992.3	27072.4	84995.5	14111.9	53318.2	54246.2	54248
M733T143_1	732.552	143.269	1-oleoyl-2-myristoyl-sn-glycero-3-phosphocholine	[M+H]+	HMDB0008097		Lipids and lipid-like molecules	Glycerophospholipids	Glycerophosphocholines	2.05324e+07	2.21381e+07	2.21652e+07	1.05351e+07	7.60711e+06	2.33921e+07	1.46564e+07	6.73655e+06	1.10276e+07	5.51608e+06	1.26255e+07	8.11441e+06	3.58337e+06	3.73071e+06	3.70834e+06
M522T191_2	522.354	191.445	1-oleoyl-sn-glycero-3-phosphocholine	[M+H]+	HMDB0002815		Lipids and lipid-like molecules	Glycerophospholipids	Glycerophosphocholines	4.0771e+06	3.65414e+06	3.70175e+06	268044	1.1207e+06	3.84799e+06	2.82613e+06	4.6165e+06	3.06181e+06	3.33645e+06	1.25228e+06	521263	3.4988e+06	3.57318e+06	3.54956e+06
M480T198	480.307	198.449	1-oleoyl-sn-glycero-3-phosphoethanolamine	[M+H]+	HMDB0011506		Lipids and lipid-like molecules	Glycerophospholipids	Glycerophosphoethanolamines	288652	210292	260350	44455.1	35776.3	196847	148273	151142	101917	150353	60285	34083.4	152849	153028	166606
M666T238	666.429	237.666	1-palmitoyl-2-azelaoylphosphatidylcholine	[M+H]+			Lipids and lipid-like molecules	Glycerophospholipids	Glycerophosphocholines	11521.4	3911.11	2463.88	901.108	4396.05	1018.13	4187.56	33763.3	389.501	26343.5	1030.02	4471.72	11579.5	11571.9	11982.7
M807T136_1	806.565	136.087	1-palmitoyl-2-docosahexaenoyl-sn-glycero-3-phosphocholine	[M+H]+	HMDB0007991		Lipids and lipid-like molecules	Glycerophospholipids	Glycerophosphocholines	1.25066e+06	1.41581e+06	1.43996e+06	757210	817050	1.73933e+06	1.01713e+06	495938	669312	395668	604965	517689	369716	388176	371676
M454T201	454.29	201.182	1-palmitoyl-2-hydroxy-sn-glycero-3-phosphoethanolamine	[M+H]+	HMDB0011503		Lipids and lipid-like molecules	Glycerophospholipids	Glycerophosphoethanolamines	81226.1	67639.4	69011.2	14288.4	13185.9	67461.1	44217.2	66607.3	24468.4	43417.4	17439.5	11474.3	58054.8	58685.5	58685.2
M679T147	678.505	147.425	1-palmitoyl-2-lauroyl-sn-glycero-3-phosphorylcholine	[M+H]+			Lipids and lipid-like molecules	Glycerophospholipids	Glycerophosphocholines	1.81689e+06	1.91698e+06	2.40347e+06	638495	331640	1.75529e+06	1.09255e+06	310223	399607	251681	509156	319765	160732	168870	168853
M759T87	758.566	86.767	1-palmitoyl-2-linoleoyl-sn-glycero-3-phosphocholine	[M+H]+	HMDB0007973		Lipids and lipid-like molecules	Glycerophospholipids	Glycerophosphocholines	1.39962e+06	1.31663e+06	2.34175e+06	5065.24	6816.98	1.67375e+06	1.19418e+07	220303	136909	571724	2780.38	718552	177573	191776	195750
M707T146	706.536	145.826	1-palmitoyl-2-myristoyl-sn-glycero-3-phosphocholine	[M+H]+	HMDB0007965		Lipids and lipid-like molecules	Glycerophospholipids	Glycerophosphocholines	1.33941e+07	1.3215e+07	1.36508e+07	4.48695e+06	2.23687e+06	9.20215e+06	4.98081e+06	1.89508e+06	2.97846e+06	1.76837e+06	3.65658e+06	2.67719e+06	813761	867752	868109
M602T34	601.516	33.73	1-palmitoyl-2-oleoyl-3-linoleoyl-rac-glycerol	[M+H-C16H32O2]+			Lipids and lipid-like molecules	Glycerolipids	Triradylcglycerols	118805	133108	162310	18786.4	29811.7	72706.4	24675.2	22564.8	32567.4	19830	41121.9	57630.3	9528.98	9650.12	10783.5
M578T80	577.516	80.187	1-palmitoyl-2-oleoyl-sn-glycerol	[M+H-H2O]+	HMDB0007102		Lipids and lipid-like molecules	Glycerolipids	Diradylglycerols	1.5762e+06	1.62434e+06	1.73944e+06	373890	202169	404233	61303.4	18073	96032.5	28548.9	211270	27225.1	20513	20509.5	21091.2
M751T158	750.559	157.924	1-palmitoyl-2-thiopalmitoyl phosphatidylcholine	[M+H]+			Organic nitrogen compounds	Organonitrogen compounds	Quaternary ammonium salts	171903	176364	162202	32535.8	31749.7	140384	73417.8	32683.3	37499	19560.6	51199.5	23789.5	18998.7	21758.9	18511.9
M496T194_2	496.339	194.37	1-palmitoyl-sn-glycero-3-phosphocholine	[M+H]+	HMDB0010382		Lipids and lipid-like molecules	Glycerophospholipids	Glycerophosphocholines	4.23217e+06	2.94699e+06	4.00812e+06	283094	785624	3.84741e+06	3.21003e+06	4.12559e+06	2.69656e+06	3.2196e+06	1.31821e+06	606125	3.41597e+06	3.42097e+06	3.45096e+06
M313T37	313.272	36.777	1-Palmitoylglycerol	(M+H-H2O)+						877241	895642	1.2035e+06	420741	388810	783815	812692	486195	534429	498979	528790	493760	603853	603821	594731
M482T191	482.321	191.376	1-pentadecanoyl-sn-glycero-3-phosphocholine	[M+H]+	HMDB0010381		Lipids and lipid-like molecules	Glycerophospholipids	Glycerophosphocholines	76727.1	46829.4	61712	7874.06	27177.6	47962	31541.5	53636.1	45669.7	83407.5	31288.9	36932.1	40003.9	39472.5	28518.6
M364T211	364.246	210.926	1-pyrrolidineheptanoic acid, 2-[(1e,3s,4s)-3-hydroxy-4-methyl-1-nonen-6-yn-1-yl]-5-oxo-, (2r)-	[M+H]+			Lipids and lipid-like molecules	Fatty Acyls	Fatty acids and conjugates	4706.01	453.715	984.246	451.982	4796.83	559.432	2153	1375.84	1216.82	3592.31	494.814	2065.24	1503.78	1584.22	1503.28
M835T135	834.595	134.878	1-stearoyl-2-docosahexaenoyl-sn-glycero-3-phosphocholine	[M+H]+	HMDB0008057		Lipids and lipid-like molecules	Glycerophospholipids	Glycerophosphocholines	676201	717181	734812	320903	192531	660477	304689	171920	236952	171329	220164	177169	116124	123770	122104
M652T197	651.531	196.8	1-stearoyl-2-docosahexaenoyl-sn-glycerol	[M+H-H2O]+	HMDB0007179		Lipids and lipid-like molecules	Glycerolipids	Diradylglycerols	42271.9	40337.1	25222.6	1944.07	1869.54	6781.56	1891.92	659.584	2547.58	1022.55	2325.92	530.841	486.92	500.912	504.609
M506T181	506.358	181.093	1-Stearoyl-2-hydroxy-sn-glycero-3-phosphocholine	(M+H-H2O)+						105858	79633.2	97849.6	9418.89	20215.1	87285.8	89779.5	93381.9	62663.8	50374.4	39057.1	8965.66	62908.6	64950	62901.6
M820T50	819.512	49.869	1-stearoyl-2-linoleoyl-sn-glycero-3-phospho-(1'-rac-glycerol)	[M-H+2Na]+			Lipids and lipid-like molecules	Glycerophospholipids	Glycerophosphoglycerols	21585.1	22521.8	24446	28577.5	11942.5	22425	49186.9	11141.4	35059.8	6316.56	32633.8	21955.4	4679.73	5193.35	5173.84
M747T41_1	746.558	40.625	1-stearoyl-2-oleoyl-sn-glycero-3-phosphoethanolamine	[M+H]+	HMDB0008993		Lipids and lipid-like molecules	Glycerophospholipids	Glycerophosphoethanolamines	3.75548e+06	36061.2	3.60013e+06	32725.4	120865	2.03105e+06	116350	633.96	156061	1.24212e+06	120651	18707.4	1.01495e+06	980205	1.01463e+06
M811T95	810.595	95.4985	1-Stearoyl-2-oleoyl-sn-glycerol 3-phosphocholine (SOPC)	(M+Na)+	HMDB0000564/HMDB0007878/HMDB0007879/HMDB0007880/HMDB0007882/HMDB0007884/HMDB0007886/HMDB0007887/HMDB0007897/HMDB0007898/HMDB0007911/HMDB0007912/HMDB0007913/HMDB0007914/HMDB0007936/HMDB0007937/HMDB0007938/HMDB0007939/HMDB0007940/HMDB0007958/HMDB0007959/HMDB0007960/HMDB0007961/HMDB0007964/HMDB0007966/HMDB0007967/HMDB0007981/HMDB0007982/HMDB0007983/HMDB0007984/HMDB0007985/HMDB0008002/HMDB0008003/HMD…	C00157	Lipids and lipid-like molecules	Glycerophospholipids	Glycerophosphocholines	392658	509430	531354	1912.46	958488	414719	1.68536e+06	44927.6	3.18153e+06	26319.1	1.30203e+06	127366	40558	34884.9	40555.1
M341T37_2	341.304	36.941	1-stearoyl-rac-glycerol	[M+H-H2O]+			Lipids and lipid-like molecules	Glycerolipids	Monoradylglycerols	540217	463691	641205	265530	210484	450336	442614	155474	275310	87747.8	322090	240848	174504	171336	161820
M568T188	568.336	188.294	1-Stearoyl-sn-glycerol 3-phosphocholine	(M-H+2Na)+						42941.3	26052.2	30830.7	3254.74	21320	30885.9	23629.2	21891	31731.1	28567.8	15255.3	10001	30569.3	29278.8	29351.8
M524T174	524.365	173.868	1-Stearoyl-sn-glycerol 3-phosphocholine(LPC(18:0))	[M+H]+	HMDB0010384	C04230	Lipids and lipid-like molecules	Glycerophospholipids	Glycerophosphocholines	20079.1	1972.53	20011.2	2142.42	3868.4	32815.6	6109.03	234694	9914.76	165080	6793.74	64710.7	196832	195888	195324
M227T127	227.162	126.946	1,11-undecanedicarboxylic acid	[M+H-H2O]+	HMDB0002327		Lipids and lipid-like molecules	Fatty Acyls	Fatty acids and conjugates	107200	20886.3	6037.71	28250.8	60805.4	16218.3	16483	218378	227953	179532	29403.7	2438.09	175624	179156	175631
M167T34_2	167.033	34.172	1,2-benzenedicarboxylic acid	[M+H]+	HMDB0002107	C01606	Benzenoids	Benzene and substituted derivatives	Benzoic acids and derivatives	2.53642e+06	2.39256e+06	2.65755e+06	745060	942097	2.88989e+06	2.21029e+06	2.44241e+06	1.41904e+06	2.36407e+06	1.07638e+06	1.43745e+06	2.77709e+06	2.8186e+06	2.80142e+06
M696T82	696.433	81.552	1,2-di-(9z-tetradecenoyl)-sn-glycero-3-phosphocholine	[M+Na]+	HMDB0007900		Lipids and lipid-like molecules	Glycerophospholipids	Glycerophosphocholines	6547.97	5035.85	4536.97	351.602	1228.23	9301.13	1171.66	39463	2046	52713.2	1235.33	150088	29123.1	29120.3	28664.7
M779T40	778.551	40.1995	1,2-di-(9z,12z,15z-octadecatrienoyl)-sn-glycero-3-phosphocholine	[M+H]+	HMDB0008206		Lipids and lipid-like molecules	Glycerophospholipids	Glycerophosphocholines	80742.1	86396.7	87580.8	13818.6	14529.2	98361	26729.2	73935.7	30228	63097.6	20892.8	102125	70413.3	70443.4	70530.3
M72T302	72.0807	302.187	1,2-diamino-2-methylpropane	[M+H-NH3]+			Organic nitrogen compounds	Organonitrogen compounds	Amines	845037	836600	1.03993e+06	253534	831114	1.07816e+06	690092	1.07841e+06	869109	1.2008e+06	661187	1.35985e+06	1.33809e+06	1.33453e+06	1.33809e+06
M831T40	830.565	39.9955	1,2-diarachidonoyl-sn-glycero-3-phosphocholine	[M+H]+	HMDB0008443		Lipids and lipid-like molecules	Glycerophospholipids	Glycerophosphocholines	56306.8	47631.2	47076.8	3811.84	4529.52	73277.6	76533.2	42521.6	13759.6	36590.4	11734.5	50376.4	38128.9	36407.4	38075.2
M735T179	734.563	179.233	1,2-dihexadecanoyl-sn-glycero-3-phosphocholine	[M+H]+	HMDB0000564	C00157	Lipids and lipid-like molecules	Glycerophospholipids	Glycerophosphocholines	144853	59411.1	30308.3	43730.6	66537.5	42424.6	68216.4	56807.4	92605	27719.6	151678	40101.8	15429.2	23149.8	27004
M815T500_2	815.085	499.719	1,2-dihexanoylphosphatidylinositol-3,4,5-triphosphate	[M-H+2Na]+			Lipids and lipid-like molecules	Glycerophospholipids	Glycerophosphoinositol phosphates	13050.4	15085.3	15330.3	1433.96	10570.4	7376.96	9080.63	22486.1	15493	17420.5	12576.9	20706.6	16961.3	16961.3	16671.9
M600T201	599.501	200.503	1,2-dilinoleoylglycerol	[M+H-H2O]+			Lipids and lipid-like molecules	Fatty Acyls	Lineolic acids and derivatives	64965.1	61226.9	42832.9	3173.05	3284.51	13120.3	4834.47	1829.62	5174.13	2613.81	6987.13	3387.7	1233.46	1494.87	1236.82
M787T105	786.598	105.406	1,2-dioleoyl-sn-glycero-3-phosphatidylcholine	[M+H]+	HMDB0062690		Lipids and lipid-like molecules	Glycerophospholipids	Glycerophosphocholines	7.99599e+06	8.4301e+06	8.06972e+06	19354.2	1.31502e+07	6.7666e+06	1.72148e+07	589526	4.71845e+07	717886	1.87917e+07	1.62236e+06	405541	405728	295372
M789T199	788.541	198.702	1,2-dioleoyl-sn-glycero-3-phospho-l-serine	[M+H]+	HMDB0012390		Lipids and lipid-like molecules	Glycerophospholipids	Glycerophosphoserines	515809	434593	277652	27394.5	19035	48618.3	22248.6	14832.7	27543.1	20462.3	32922.8	29781.4	9444.11	9449.02	9718.02
M745T152	744.551	152.264	1,2-dioleoyl-sn-glycero-3-phosphoethanolamine	[M+H]+	HMDB0009059		Lipids and lipid-like molecules	Glycerophospholipids	Glycerophosphoethanolamines	762383	880723	615093	28789.9	11623.4	141360	67781.2	133496	878296	227637	354380	242617	76909.6	32094.2	76258.7
M604T35_1	603.532	34.939	1,2-dioleoyl-sn-glycerol	[M+H-H2O]+	HMDB0007218		Lipids and lipid-like molecules	Glycerolipids	Diradylglycerols	280632	275342	299230	30908	23324.5	78167.1	79179.6	36291.8	50099.6	46678.1	128876	86392.7	23323.1	23383.4	20442.6
M731T143_1	730.534	142.834	1,2-dipalmitoleoyl-sn-glycero-3-phosphocholine	[M+H]+	HMDB0008002		Lipids and lipid-like molecules	Glycerophospholipids	Glycerophosphocholines	1.72664e+06	1.77246e+06	1.99069e+06	1.08914e+06	787627	2.46426e+06	2.34891e+06	863005	3.30729e+06	642678	1.25514e+06	816593	485997	543386	543963
M707T676	706.532	676.292	1,2-dipalmitoyl-sn-glycero-3-phosphoethanolamine-n-methyl	[M+H]+	HMDB0010567		Lipids and lipid-like molecules	Glycerophospholipids	Glycerophosphoethanolamines	2851.16	5376.2	2094.65	2472.19	1906.2	3708.28	2549.47	2839.46	3346.02	3917.58	3514.02	5439.97	2533.81	2791.28	2798.14
M743T146	742.536	145.625	1,2-dipalmitoyl-sn-glycero-3-phosphoethanolamine-n,n-dimethyl	[M+Na]+	HMDB0010566		Lipids and lipid-like molecules	Glycerophospholipids	Glycerophosphoethanolamines	959240	948115	783883	434191	109181	476489	209006	292635	306111	228198	16220.7	437544	101249	58833.7	99767.9
M473T468_2	473.147	467.928	1,2-dithiolane-3-pentanamide, n,n'-1,3-propanediylbis-	[M+Na]+			Organoheterocyclic compounds	Dithiolanes	Lipoamides	5133.39	2311.52	3466.17	505.127	2044.73	4549.28	2855.34	12100.1	5661.71	11340	3054.23	10842.7	10907.3	10343.2	10919.6
M109T442	109.027	441.931	1,2,3-benzenetriol	[M+H-H2O]+	HMDB0013674	C01108	Benzenoids	Phenols	Benzenetriols and derivatives	9336.76	5004.29	10843.6	1875.04	10661.6	10685.3	9161.36	12443.9	12849.7	12875	7952.77	17716.6	13479	13480.4	13319.1
M144T260	144.079	259.694	1,2,3,4-tetrahydro-.beta.-carboline	[M+H-CH3N]+	HMDB0012488		Organoheterocyclic compounds	Indoles and derivatives	Pyridoindoles	93675.3	87607	94599.9	5545.14	59464	104643	61050.5	165676	90668	175771	62797.5	216205	178197	180893	180915
M163T35	163.074	35.3965	1,3-benzodioxole-4-ethanamine, n,.alpha.-dimethyl-	[M+H-CH5N]+						26513.5	38501.7	358416	4806.47	152990	39596	25384.5	573089	32351	251969	24570.2	60257.2	68211	61752.7	68368.3
M321T264	321.044	264.093	1,4-d-xylobiose	[M+K]+		C01630	Organic oxygen compounds	Organooxygen compounds	Carbohydrates and carbohydrate conjugates	1060.62	3333.16	1532.9	3026.27	1912.04	2677.33	1141.79	4382.69	1883.95	4055.22	3356.74	19873.9	5338.74	4929.55	5325.55
M303T411	303.078	411.299	1,4-piperazinediethanesulfonic acid	[M+H]+			Organoheterocyclic compounds	Diazinanes	Piperazines	3051.38	4396.08	2626.51	650.72	3524.78	3995.55	4698.6	4408.02	5122.38	6182.29	2371.82	4155.5	5184.67	5407.02	5194.23
M315T60	315.192	59.56	1,4a-dimethyl-9-oxo-7-propan-2-yl-3,4,10,10a-tetrahydro-2h-phenanthrene-1-carboxylic acid	[M+H]+			Lipids and lipid-like molecules	Prenol lipids	Diterpenoids	17224.9	20013.6	119816	4624.78	21364.8	6334.31	23160.7	23162.7	44602.1	27259.8	19669.7	8495.25	10189.7	8250.63	8358.49
M86T476	86.0956	476.289	1,5-pentanediamine	[M+H-NH3]+	HMDB0002322	C01672	Organic nitrogen compounds	Organonitrogen compounds	Amines	89572.1	73350.7	58088.2	14758.3	40566.8	51170.3	35508.1	83961.1	44909.7	41561.1	37913.6	58914.3	98299.5	98241	92526.4
M472T436	472.161	436.178	10-formyl-7,8-dihydrofolic acid	[M+H]+	HMDB0006485	C03204	Organoheterocyclic compounds	Pteridines and derivatives	Pterins and derivatives	28819.7	24204.8	14730.5	3740.49	11306.3	24890.5	17199.7	44229.4	22742.1	42407.5	16901.3	62881.6	40125.3	41621.4	41629.9
M435T29	435.228	28.94	11-(dansylamino)undecanoic acid	[M+H]+			Benzenoids	Naphthalenes	Naphthalene sulfonic acids and derivatives	5299.58	4163.25	4482.83	1018.08	3810.45	3271.44	4025.63	6635.46	2721.69	6666.45	2892.17	2803.95	7566.9	7572.17	7209.8
M624T190	624.314	190.248	15-deoxy-.delta.12,14-prostaglandin j2 glutathione	[M+H]+			Lipids and lipid-like molecules	Fatty Acyls	Eicosanoids	2871.1	3434.34	3491.26	644.635	1981.39	2702.88	3391.27	4724.13	1796.05	2511.21	1748.45	235.928	2712.69	2805.31	2594.12
M284T56	284.33	55.886	15-deoxy-goyazensolide	[M+K]+			Organoheterocyclic compounds	Lactones	Gamma butyrolactones	552328	416865	257711	12913	18159	426349	19699.2	9.74306e+06	25058	8.11702e+06	23995.4	166311	421875	426257	422679
M396T206	396.257	205.756	15-ketobimatoprost	[M+H-H2O]+			Lipids and lipid-like molecules	Fatty Acyls	Eicosanoids	18421.5	4375.09	3837.34	207.138	3452.59	6096.84	4383.27	10735	6464.24	10187.5	1046.03	3729.93	8899.26	8761.16	8899.74
M375T501	375.222	500.748	15-ketoprostaglandin f2.alpha.	[M+Na]+	HMDB0004240		Lipids and lipid-like molecules	Fatty Acyls	Eicosanoids	200359	204289	204319	45487.4	191047	251088	195531	434533	289503	395733	216408	521326	376318	373554	373553
M295T52	295.225	51.726	16-Hydroxypalmitic acid	(M+Na)+	HMDB0006294	C18218	Lipids and lipid-like molecules	Fatty Acyls	Fatty acids and conjugates	136522	194441	72950.1	16032.7	70015.9	154473	157042	136970	645643	57761.1	111049	45676.5	44780.1	46350.9	46367.4
M481T36_1	481.258	35.5415	17-trifluoromethylphenyltrinorprostaglandin f2.alpha. isopropyl ester	[M+H-H2O]+			Lipids and lipid-like molecules	Fatty Acyls	Eicosanoids	18013.7	10666.9	7901.28	3633.15	22790.1	15485.4	9920.8	12022.8	10377.2	11603	16284.4	2492.92	11626.5	12878.2	12881.8
M485T42	485.355	41.931	18.beta.-glycyrrhetic acid methyl ester	[M+H]+			Lipids and lipid-like molecules	Prenol lipids	Triterpenoids	57900.7	78179	51893.6	36678.8	258161	102424	165695	139675	194987	162021	173305	279810	145383	138908	138650
M202T42	202.085	42.182	1h-indol-4-ol, 3-[2-(dimethylamino)ethyl]-, 4-acetate	[M+H-C2H7N]+			Organoheterocyclic compounds	Indoles and derivatives	Tryptamines and derivatives	66835.9	67480.1	68340	43550.4	98663.4	57249.8	135874	112461	139393	88937.2	142376	52893.8	129613	134687	129682
M568T440	568.183	440.051	1h-indole-5-sulfonamide, n-(3-chlorophenyl)-3-[[3,5-dimethyl-4-[(4-methyl-1-piperazinyl)carbonyl]-1h-pyrrol-2-yl]methylene]-2,3-dihydro-n-methyl-2-oxo-, (3z)-	[M+H]+			Benzenoids	Benzene and substituted derivatives	Sulfanilides	219314	194676	257038	30326.4	158669	254181	186123	244117	200104	340419	223063	192886	286702	285618	299251
M594T169	594.374	168.722	2-(5-oxovaleryl)phosphatidylcholine	[M+H]+			Lipids and lipid-like molecules	Glycerophospholipids	Glycerophosphocholines	10348.9	1526.28	853.249	401.241	1896.04	2036	3143.24	5333.15	12769.7	345.834	3663.19	316.895	5942.4	6566.42	5997.21
M622T429	622.28	428.631	2-(cyclohexylamino)ethanesulfonic acid	[3M+H]+			Organic nitrogen compounds	Organonitrogen compounds	Cyclohexylamines	2679.32	1992.38	4827.23	1136.6	3723	3138.68	3721.63	5820.86	4994.5	4172.41	4284.58	5074.94	5318.06	5319.08	5656.15
M939T406	939.487	406.114	2-[[6-[[17-[5,6-dimethyl-3-[3,4,5-trihydroxy-6-(hydroxymethyl)oxan-2-yl]oxyhept-5-en-2-yl]-1-hydroxy-10,13-dimethyl-2,3,4,7,8,9,11,12,14,15,16,17-dodecahydro-1h-cyclopenta[a]phenanthren-3-yl]oxy]-3,4,5-trihydroxyoxan-2-yl]methoxy]-6-(hydroxymethyl)oxane-3,4,5-triol	[M+Na]+			Lipids and lipid-like molecules	Steroids and steroid derivatives	Steroidal glycosides	755.624	896.2	2236.45	457.132	1022.81	1574.58	1579.12	3723.73	1672.55	4362.83	1653.63	4558.62	2242.45	2327.29	2232.37
M174T233	174.037	233.305	2-acetylamino-3-mercapto-3-methylbutyric acid	[M+H-H2O]+			Organic acids and derivatives	Carboxylic acids and derivatives	Amino acids, peptides, and analogues	125011	100273	122197	34812.9	130351	43822.2	60775.3	161361	50997.2	396011	76578.8	294718	289784	301527	289976
M618T200	617.545	199.536	2-alahhda [dmed-fahfa]	[M+H]+						10679.7	10233.9	5351.95	325.358	777.117	1517.53	919.039	888.34	1018.06	763.033	816.607	554.155	775.958	721.79	775.533
M120T259_2	120.08	258.546	2-amino-1-phenylethanol	[M+H-H2O]+	HMDB0001065	C02735	Organic nitrogen compounds	Organonitrogen compounds	Amines	1.15436e+07	1.16886e+07	1.3751e+07	936237	1.003e+07	1.38427e+07	9.11671e+06	2.27338e+07	1.4046e+07	2.31616e+07	9.91275e+06	2.87997e+07	2.26003e+07	2.16291e+07	2.26028e+07
M70T398	70.0645	398.219	2-Amino-2-methyl-1,3-propanediol	(M+H-2H2O)+						42099.8	131092	41186.6	36342.1	42143.1	56679.3	80646.6	42083.9	81292.2	79280	88759.9	74589	56994.5	55651.3	55690.9
M250T230	250.024	230.04	2-amino-5-chloro-2'-fluorobenzophenone	[M+H]+			Benzenoids	Benzene and substituted derivatives	Benzophenones	4472.11	6471.7	9216.25	2161.69	7334.57	7396.36	2270.93	9194.95	4470.59	26631.8	8180.87	20289.5	15157.7	14389.7	15166.1
M116T54	116.069	54.38	2-aminoadipic acid	[M+H-CH2O2]+	HMDB0000510	C00956	Organic acids and derivatives	Carboxylic acids and derivatives	Amino acids, peptides, and analogues	147434	182056	112841	20575.4	90535.4	120936	183550	211578	242535	204586	107662	92298.8	267449	246206	267808
M361T39	361.271	38.6675	2-arachidonoylglycerol	[M+H-H2O]+	HMDB0004666	C13856				51095.8	41471.5	57209.4	18484.3	45053.2	35254.2	39581	31298	75097.5	14640.4	30456.4	21916.6	3747.24	3756.84	5687.82
M365T41	365.303	40.952	2-arachidonyl glycerol ether	[M+H]+	HMDB0013657					86984	62919	77876.1	18093.1	70612.3	86253.9	92370.3	70920.9	177666	25335.7	71208.6	30924.6	27686.7	31775.1	28254.1
M486T426	486.178	425.859	2-butenamide, n-[4-[(3-chloro-4-fluorophenyl)amino]-7-[[(3s)-tetrahydro-3-furanyl]oxy]-6-quinazolinyl]-4-(dimethylamino)-	[M+H]+			Organoheterocyclic compounds	Diazanaphthalenes	Benzodiazines	12243	11396.2	17494.1	1541.46	14559.1	13875.6	12411.8	16710.6	16295.8	20208.7	19054.2	17870.1	15911	15551.5	15582.9
M106T106	106.064	106.188	2-butylaniline	[M+H-C3H8]+			Benzenoids	Benzene and substituted derivatives	Aniline and substituted anilines	13090.3	57804.2	95443.7	13131	40419.8	65138.3	26038.7	60805.3	41529.1	95278.8	72222.7	196169	96844.3	100716	100716
M265T202	265.153	202.382	2-cis-4-trans-abscisic acid	[M+H]+		C06082	Lipids and lipid-like molecules	Prenol lipids	Sesquiterpenoids	5192.24	5456.16	8759.03	867.474	3490.81	6388.56	2350.28	2150.72	4196.14	6592.91	3867.95	4468.69	4039.93	4024.58	4619.51
M626T199	625.515	198.542	2-dhahma [dmed-fahfa]	[M+H]+						287654	254855	183664	12210.8	13580.3	43429.3	14395.6	6777.35	19171.8	9642.47	20301.6	11984.3	5490.64	5202.59	5509.17
M632T200	631.56	200.254	2-erahpa [dmed-fahfa]	[M+H]+						47297.6	38875.5	19271	4080.08	1973.52	2313.15	3388.86	2762.48	3395.4	2831.18	5553.02	4150.1	1651.11	1904.27	1657.12
M113T34_2	113.132	34.1745	2-ethyl-1-hexanol	[M+H-H2O]+	HMDB0031231	C02498	Lipids and lipid-like molecules	Fatty Acyls	Fatty alcohols	1.14455e+06	1.09775e+06	1.29546e+06	339793	385624	1.25157e+06	975470	1.10031e+06	581787	927630	431089	585487	1.21899e+06	1.21903e+06	1.23221e+06
M579T432	579.249	432.156	2-hydroxyatorvastatin lactone	[M+Na]+			Organoheterocyclic compounds	Pyrroles	Substituted pyrroles	2311.34	1495.17	2506	434.737	1829.18	2991.16	3435.15	7053.29	3341.66	6091.06	3332.09	7889.38	5630.03	4733.14	5618.44
M107T258	107.048	258.397	2-hydroxybenzyl alcohol	[M+H-H2O]+	HMDB0059709	C02323	Benzenoids	Benzene and substituted derivatives	Benzyl alcohols	99166	90389.2	101069	8410.31	84409	112341	73897.8	187623	101608	155311	80265.1	205197	184531	181818	184495
M225T35_1	225.09	35.093	2-hydroxychalcone	[M+H]+			Phenylpropanoids and polyketides	Linear 1,3-diarylpropanoids	Chalcones and dihydrochalcones	4908.49	34153.5	5874.49	5837.14	9426.57	7051.07	7269.91	11381.2	9925.24	5989.51	402088	851489	82200.3	82782.9	69108.4
M113T197	113.106	197.486	2-imino-4-methylpiperidine	[M+H]+			Organoheterocyclic compounds	Pyridines and derivatives	Hydropyridines	8979.81	6422.66	9471.89	8274.99	7364.01	7408.51	4561.38	12600.5	7120.68	15960.5	5701.83	25794.7	16511.5	16310.8	16309.7
M337T41	337.273	40.68	2-linoleoylglycerol	[M+H-H2O]+	HMDB0011538		Lipids and lipid-like molecules	Fatty Acyls	Lineolic acids and derivatives	206117	268118	161647	28650.7	211421	116523	218177	133562	355802	123136	247558	115620	37901.5	51718.3	51835.5
M69T278	69.0692	277.729	2-methyl-3-buten-2-ol	[M+H-H2O]+	HMDB0033854	C21402	Organic oxygen compounds	Organooxygen compounds	Alcohols and polyols	94069	105528	96755.4	14478.6	92497.7	128027	73682	69495.2	72097.4	85982.3	73065.7	58941	127283	123260	127297
M133T36	133.1	36.1185	2-methylamino-1-phenylbutane	[M+H-CH5N]+			Benzenoids	Benzene and substituted derivatives	Phenethylamines	105516	124128	96321.6	18500	65792.7	120448	99835.4	122967	124374	314539	248859	47729.6	200589	206413	200634
M246T244	246.17	243.863	2-methylbutyryl-l-carnitine	[M+H]+			Lipids and lipid-like molecules	Fatty Acyls	Fatty acid esters	551449	391334	561433	392534	399107	1.46294e+06	1.25062e+06	1.71932e+07	7.38999e+06	1.40857e+07	1.97494e+06	2.31006e+07	9.38029e+06	9.47259e+06	9.3798e+06
M119T162	119.034	162.32	2-methylhippuric acid	[M+H-C2H5O2N]+	HMDB0011723		Benzenoids	Benzene and substituted derivatives	Benzoic acids and derivatives	657632	837509	972181	327032	1.04565e+06	1.35553e+06	594148	1.41609e+06	830122	2.28404e+06	853788	2.8016e+06	1.59258e+06	1.54263e+06	1.59362e+06
M783T138	782.567	137.986	2-oleoyl-1-palmitoyl-sn-glycero-3-phosphocholine	[M+Na]+	HMDB0007972		Lipids and lipid-like molecules	Glycerophospholipids	Glycerophosphocholines	6.07452e+06	6.3393e+06	6.89414e+06	3.34284e+06	2.75277e+06	7.96703e+06	5.13599e+06	2.35916e+06	3.44801e+06	2.10705e+06	3.53814e+06	2.64986e+06	1.54188e+06	1.6642e+06	1.55339e+06
M791T212	790.571	212.392	2-oleoyl-1-stearoyl-sn-glycero-3-phosphoserine	[M+H]+	HMDB0010163		Lipids and lipid-like molecules	Glycerophospholipids	Glycerophosphoserines	25135.6	40189.6	15012.8	5185.79	22235.2	21506.2	21629.1	31696.2	22864.8	9127.5	30309.4	63550.3	51245.3	51271.3	54822.8
M219T371	219.133	370.898	2-phenylpiperidine-2-acetamide	[M+H]+			Organic acids and derivatives	Carboxylic acids and derivatives	Amino acids, peptides, and analogues	33092.7	31706.5	34503.3	10419.1	26967.4	37858.9	28730.8	38316.7	35577	43209.6	27300.3	47290.6	42169.3	41297.3	42178.5
M100T48	100.075	47.9005	2-pyrrolidinone, 1-methyl-	[M+H]+		C11118	Organoheterocyclic compounds	Pyrrolidines	N-alkylpyrrolidines	72679	43234.2	37271.9	19024.2	68488.9	56584.5	84800.3	85402.1	72235.8	101718	65319.3	42320.1	95405	97053.3	97052.3
M573T80	573.485	79.838	2-sdahma [dmed-fahfa]	[M+H]+						99289	155546	154136	42808	14260.2	114116	7325.24	2437.98	4818.05	1934.07	12439.2	4759.28	1554.42	1673.07	1673.38
M210T227	210.109	227.321	2,2-bis[hydroxymethyl]-2,2',2''-nitrilotriethanol	[M+H]+			Organic nitrogen compounds	Organonitrogen compounds	Amines	150071	126130	61342.3	13028	76891.1	61144.6	76407.1	80222.9	84873.5	33865.8	51886.1	40453.9	30593.5	30584.9	29764.8
M349T56	349.18	55.65	2,3-dinor-8-isoprostaglandin-f2.alpha.	[M+Na]+		C14794	Lipids and lipid-like molecules	Fatty Acyls	Eicosanoids	15526	23705.2	8313.22	2584.84	17791.7	20198.1	21441	39145.4	49194.8	29682.9	13835.1	17415	23631.3	23331.7	23332
M560T421	560.215	420.697	2,3,9,10,11,12-hexahydro-10s-hydroxy-9-methyl-1-oxo-9r,12s-epoxy-1h-diindolo[1,2,3-fg:3',2',1'-kl]pyrrolo[3,4-i][1,6]benzodiazocine-10-carboxylic acid, hexyl ester	[M+Na]+			Organoheterocyclic compounds	Indoles and derivatives	Carbazoles	5576.04	5311.42	3769.89	586.66	3549.16	5002.77	5582.94	10254.9	6854.64	9320.73	7142.53	12509.9	9209.53	9205.97	9380.21
M286T291	285.981	290.721	2,4-thiazolidinedione, 5-[(2,2-difluoro-1,3-benzodioxol-5-yl)methylene]-	[M+H]+						7357.2	17070.8	19205	44596.5	17384.6	36636.9	14637.2	43247	36188	47555.7	21455.3	56025.2	35679.5	39081.5	35598.8
M246T43	246.242	43.2595	2,4,6-tri-tert-butylaniline	[M+H-CH4]+			Benzenoids	Benzene and substituted derivatives	Phenylpropanes	119906	118826	152857	3016.51	4247.28	190275	4613.3	473406	7833.59	416528	4849.65	351739	376247	370252	369262
M128T299_2	128.069	298.764	2,6-diaminopimelic acid	[M+H-CH5O2N]+			Organic acids and derivatives	Carboxylic acids and derivatives	Amino acids, peptides, and analogues	1965.33	1678.7	655.23	1907.01	871.005	1130.22	902.266	1181.46	566.576	1164.13	911.946	838.885	918.386	859.283	862.44
M197T231_2	197.125	230.961	2,7-diaminofluorene	[M+H]+						8275.91	4833.69	3676.33	796.549	3401.28	2592.56	4918.05	13012.4	1259.34	5071.96	4245.05	11165.4	4706.97	4211.53	4721.9
M332T425	332.075	425.066	2'-deoxyadenosine 5'-monophosphate	[M+H]+	HMDB0000905	C00360	Nucleosides, nucleotides, and analogues	Purine nucleotides	Purine deoxyribonucleotides	97295.9	103368	90302	15935.6	73109.4	103323	38454.3	91433.8	78217.7	132292	65880.3	158947	128248	126705	128234
M389T467	389.102	466.635	2'-Deoxyguanosine 5'-monophosphate (dGMP)	(M+CH3CN+H)+	HMDB0001044	C00362	Nucleosides, nucleotides, and analogues	Purine nucleotides	Purine deoxyribonucleotides	150527	132630	88119	10301	67580.1	137749	39040.1	118351	78999.1	67585.3	44504.2	127134	183073	177319	183051
M96T442	96.0436	441.928	2(1h)-pyridinone	[M+H]+	HMDB0013751	C02502	Organoheterocyclic compounds	Pyridines and derivatives	Hydropyridines	46083.1	43494.9	56405.5	8872.42	48566.5	49228.8	37742.1	57689.5	42649.8	59442	34335.2	74057.4	62908.6	62776.3	60291.2
M479T448	479.244	448.056	21-deacetoxy-11-oxodeflazacort-3,20-hydrazinecarboxamide	[M+H-NH3]+			Lipids and lipid-like molecules	Steroids and steroid derivatives	Pregnane steroids	6273.35	7734.03	11747.7	3091.55	8638.88	7473.03	6517.78	7126.39	7778.67	7683.28	6703.17	10189.1	8006.48	8060.05	7865.45
M795T517	795.434	516.512	3-(1h-indol-3-ylmethyl)-6,18-dimethyl-12-(1-phenylethyl)-9,15-di(propan-2-yl)-1,4,7,10,13,16,19-heptazacyclotricosane-2,5,8,11,14,17,20-heptone	[M+Na]+			Organic acids and derivatives	Peptidomimetics	Hybrid peptides	2694.78	2691.88	4291.65	978.33	2809.29	4386.23	2716.9	7823.39	6788.47	7986.31	3368.51	8473.96	5829.68	5721.75	5722.37
M679T498	679.102	498.082	3-[(2s,3r,4s,5s,6r)-4,5-dihydroxy-6-(hydroxymethyl)-3-[(2s,3r,4s,5s,6r)-3,4,5-trihydroxy-6-(hydroxymethyl)oxan-2-yl]oxyoxan-2-yl]oxy-2-(3,4-dihydroxyphenyl)-5-hydroxy-7-methoxychromen-4-one	[M+K]+			Phenylpropanoids and polyketides	Flavonoids	Flavonoid glycosides	1069.96	2173.12	1657.14	2487.86	2429.28	2180.57	3790.06	1730.87	1101.72	2618.52	2104.11	2922.48	2607.38	2709.17	2712.68
M448T138	448.339	137.577	3-[(cholamidopropyl)dimethylammonio]-1-propanesulfonate	[M+H-C5H13SO3N]+		C11321	Lipids and lipid-like molecules	Steroids and steroid derivatives	Bile acids, alcohols and derivatives	12200	105.466	12879.8	206.687	268.182	1167.32	792.965	25270	2114.76	31656.3	7475.34	5905.83	30707.8	38004.2	29877.4
M443T31	443.203	30.6305	3-[1-[3-(dimethylamino)propyl]-5-methoxy-1h-indol-3-yl]-4-(1h-indol-3-yl)-1h-pyrrole-2,5-dione	[M+H]+			Organoheterocyclic compounds	Indoles and derivatives	N-alkylindoles	7521.23	6373.47	5348.41	1006.01	8107.5	7724.22	8541.18	11177	10907.8	12047.7	4902.57	8469.08	10750	10951.8	10951.4
M104T51	104.07	51.026	3-aminobutanoic acid	[M+H]+	HMDB0031654		Organic acids and derivatives	Carboxylic acids and derivatives	Amino acids, peptides, and analogues	43185	51552.6	51262.3	7308.16	35956.9	52854.4	58067.1	78109.5	62002.9	89637.6	46367.9	60395.7	77825.1	77651.2	77421.3
M145T153	145.075	153.257	3-aminoquinoline	[M+H]+			Organoheterocyclic compounds	Quinolines and derivatives	Aminoquinolines and derivatives	33869.9	25557.9	28774.9	4041.29	31248.1	34130.1	32747.9	33215.6	29772	33119.2	27760.5	12350.4	47840.8	43219.7	43778
M171T40	171.148	39.881	3-cyclohexyl-1,1-dimethylurea	[M+H]+			Organic acids and derivatives	Organic carbonic acids and derivatives	Ureas	428838	511761	170083	420520	1.06107e+06	225143	2.05965e+06	1.17704e+06	2.1987e+06	798447	1.14336e+06	1.53354e+06	1.07534e+06	1.05386e+06	1.07528e+06
M178T285	178.085	285.317	3-fluoroethcathinone	[M+H-H2O]+			Organic oxygen compounds	Organooxygen compounds	Carbonyl compounds	37750.1	35583	37847.9	9596.14	33191.6	30568.8	36541.8	6311	20768.7	5104.89	24847.1	7405.39	6139.23	6493.72	6183.38
M126T442	126.054	441.965	3-hydroxyacetaminophen	[M+H-C2H2O]+			Benzenoids	Benzene and substituted derivatives	Anilides	92592.1	87041.1	92662.3	19578.6	82127.5	105225	59898.1	111970	82555.2	111688	77904.5	134896	112361	113268	112365
M154T351	154.057	351.33	3-hydroxyanthranilic acid	[M+H]+	HMDB0001476	C00632	Benzenoids	Benzene and substituted derivatives	Benzoic acids and derivatives	423838	433158	534378	66655.7	501091	671474	452854	638088	500893	821462	445964	785429	666803	663980	666841
M248T324	248.149	324.23	3-hydroxybutyrylcarnitine	[M+H]+	HMDB0062735		Lipids and lipid-like molecules	Fatty Acyls	Fatty acid esters	910632	970370	886461	170877	921704	1.02388e+06	754628	275112	901730	570264	771390	23083.5	827260	831320	827229
M258T74	258.205	74.329	3-Hydroxydodecanoic acid	(M+CH3CN+H)+	HMDB0000387		Organic acids and derivatives	Hydroxy acids and derivatives	Medium-chain hydroxy acids and derivatives	31259	24065.6	23263.9	1825.58	16905	34114.1	214635	49338	461543	29845.3	12401	80936.7	24099.1	23867.3	24100.3
M416T196	416.335	196.071	3-hydroxyhexadecanoylcarnitine	[M+H]+			Lipids and lipid-like molecules	Fatty Acyls	Fatty acid esters	46135.1	27064.9	32677.7	10295.3	11987.9	25953.7	42402.1	59194.1	35444	52619.5	39175.8	12574.5	46666.7	47085.7	46666.4
M424T150	424.34	150.37	3-hydroxyoleylcarnitine	[M+H-H2O]+			Lipids and lipid-like molecules	Fatty Acyls	Fatty acid esters	25234.6	23082.8	51666.1	2308.98	7408.85	279003	6491.31	532726	7734.14	513154	8477.08	96899.1	814496	815071	554389
M503T410	503.279	410.228	3-hydroxystanozolol glucuronide	[M+H-H2O]+			Lipids and lipid-like molecules	Steroids and steroid derivatives	Steroidal glycosides	2504.44	1764.94	1424.75	481.308	1159.98	2980.38	3841.11	9889.5	3478.57	5815.24	2573.11	8933.89	4875.98	4479.93	4879.93
M170T383	170.091	382.716	3-Methyl-L-histidine	(M+H)+						176368	427885	435347	87277	362400	115786	75118.3	114700	101219	152196	75580.1	670918	120173	120198	122161
M290T249	290.158	249.444	3-methylglutarylcarnitine	[M+H]+	HMDB0000552		Lipids and lipid-like molecules	Fatty Acyls	Fatty acid esters	648.996	1722.96	2057.4	852.365	100.915	4083.45	1445.39	10153.8	7165.89	9582.43	2869.59	9965.48	8324.63	7954.46	7956.58
M170T399	170.092	398.922	3-Methylhistidine	(M+H)+	HMDB0000001/HMDB0000479	C01152	Organic acids and derivatives	Carboxylic acids and derivatives	"Amino acids, peptides, and analogues"	125533	124846	120797	42265.3	105004	125047	86966.2	141118	134238	197040	99080.8	156255	157827	154910	158968
M132T180_2	132.08	179.997	3-methylindole	[M+H]+	HMDB0000466	C08313	Organoheterocyclic compounds	Indoles and derivatives	Indoles	6293.05	13509.9	12560.1	1448.3	1900.61	9678.58	12132.1	43790.6	19388.4	32355	6868.88	28486.9	34886.9	35778.4	35775.9
M468T428	468.163	427.79	3-pyridinecarboxamide, 6-amino-n-[3-[4-(4-morpholinyl)pyrido[3',2':4,5]furo[3,2-d]pyrimidin-2-yl]phenyl]-	[M+H]+			Benzenoids	Benzene and substituted derivatives	Anilides	1644.8	509.938	1242.55	308.877	1369.92	996.815	1297.22	2027.57	1654.73	1454.4	1963.62	4168.95	2150.53	1964.31	1945.24
M161T49	161.07	48.649	3-trans-hydroxynorcotinine	[M+H-H2O]+			Organoheterocyclic compounds	Pyridines and derivatives	Pyrrolidinylpyridines	10969.5	7664.73	16236.4	40198.3	331268	50676.9	29003.5	32138.6	26947.3	40193	25618.6	5704.13	31335.4	31409.4	29124.6
M133T383	133.059	382.771	3-Ureidopropionate	(M+H)+	HMDB0000026/HMDB0062812	C02642	Organic acids and derivatives	Organic carbonic acids and derivatives	Ureas	2487.62	3901.68	3688.01	4136.89	3548.03	3921.47	10224	3034.63	13717.3	18100.3	11024.5	3653.18	3958.89	3711.25	3678.11
M297T65	297.099	64.837	3,4-dihydrocoumarin	[2M+H]+	HMDB0036626	C02274				19045.6	2877.73	10309.6	4393.3	13255	13350	6161.37	6054.29	8791.21	5264.52	4369.16	2618.78	5041.7	4740.28	4728.64
M261T288	260.956	288.126	3,4-Dihydroxymandelic acid	(M-H+2K)+						66948	68761.4	65667.5	89444.7	78543.7	55063.7	70752	39293.6	25562.8	30426	67000.1	41626	26144	24402.1	24574
M657T275	657.24	275.267	3'-.alpha.-sialyl-n-acetyllactosamine	[M+H-H2O]+			Organic oxygen compounds	Organooxygen compounds	Carbohydrates and carbohydrate conjugates	18366.6	34299.2	15522.9	101.651	16239.7	17689.1	13714.5	14524.6	34285.6	9996.7	12729.6	4689.08	27985.8	23336.1	28063.5
M392T436	392.032	435.576	3'-azido-3'-deoxythymidine 5'-monophosphate	[M-H+2Na]+			Organoheterocyclic compounds	Diazines	Pyrimidines and pyrimidine derivatives	9662.63	9337.08	12107.5	3647.07	11069.9	9237.74	4774.37	10320.4	8748.27	13847.9	6954.24	19435.9	12681.6	12852.1	12688
M298T199	298.113	198.788	3'-o-methylguanosine	[M+H]+	HMDB0006038		Nucleosides, nucleotides, and analogues	Purine nucleosides		4763.79	1938.24	5394.38	5179.19	3174.28	5916.86	4144.58	8745.81	5021.44	10941.8	3795.99	9667.59	7821.7	7523.28	7815.11
M631T455	631.168	455.365	4-(2,3-dihydroxy-3-methylbutoxy)furo(3,2-g)chromen-7-one	[2M+Na]+			Phenylpropanoids and polyketides	Coumarins and derivatives	Furanocoumarins	117481	100537	114214	196.713	72794.1	137296	118582	323909	220452	339935	146851	399699	274264	272966	274277
M228T502	228.17	501.707	4-(4-phenyl-1h-pyrazol-1-yl)piperidine	[M+H]+			Organoheterocyclic compounds	Azoles	Pyrazoles	8936.29	4459.27	8786.96	9345.49	2929.62	4934.78	3853.7	8515.49	5890.95	5179.22	9437.55	14307.9	10115	9382.16	9385.59
M177T62	177.111	62.351	4-(methylamino)-4-(3-pyridyl)butyric acid	[M+H-H2O]+			Organic acids and derivatives	Carboxylic acids and derivatives	Amino acids, peptides, and analogues	22795.1	21072.6	19820.7	2217.42	21978.7	14599.5	23832.5	36512.6	32095.2	28000.8	15262.9	27683.4	18455.5	21471.9	18395.2
M146T293	146.08	293.496	4-acetamidobutanoate	[M+H]+	HMDB0003681	C02946	Organic acids and derivatives	Carboxylic acids and derivatives	Amino acids, peptides, and analogues	14309.1	7002.75	5402.17	1722.18	2014.47	1623.71	855.352	4077.52	1255.05	1208.91	1686.86	2108.7	2429.02	2448.04	2429.18
M137T230	137.095	229.865	4-amino-n-(tert-butyl)benzamide	[M+H-C4H8]+			Benzenoids	Benzene and substituted derivatives	Benzoic acids and derivatives	1739.96	2650.19	8167.38	5389.17	1159.92	1875.51	609.194	2528.96	1667.66	1316.33	6608.05	1839.43	2017.52	1397.37	2863.47
M104T374	104.07	374.371	4-Aminobutyric acid(GABA)	[M+H]+	HMDB0000112	C00334	Organic acids and derivatives	Carboxylic acids and derivatives	Amino acids, peptides, and analogues	98808.6	88856.4	83640.5	32593.4	85990.3	94445.6	104454	126360	135659	148059	91947	124001	110517	112021	110500
M136T238	136.022	238.053	4-aminosalicylic acid	[M+H-H2O]+	HMDB0014378	C02518	Benzenoids	Benzene and substituted derivatives	Benzoic acids and derivatives	24952.2	15871	12221.9	3339.02	12934.2	13428.1	20840.2	33402.2	35469.8	17934.3	14132.1	30437.4	27478	26810.4	28141.4
M465T458	465.228	458.421	4-androsten-17.beta.-ol-3-one glucosiduronate	[M+H]+	HMDB0003193	C11134	Lipids and lipid-like molecules	Steroids and steroid derivatives	Steroidal glycosides	8329.58	8220.15	9479.34	1395.01	6537	9990.91	7420.45	14849	9111.08	15136.9	8217.17	16585.9	13249.2	13247.6	12906.6
M178T177	178.133	176.643	4-benzofuranethanamine, 2,3-dihydro-.alpha.-methyl-	[M+H]+						3551.2	1748.06	3368.21	420.084	6283.38	2136.51	2860.25	6293.38	4269.88	5631.74	6072.82	9480.54	6189.03	5666.55	5548.02
M219T224	218.946	224.484	4-chloro-3-sulfamoylbenzoic acid	[M+H-NH3]+			Benzenoids	Benzene and substituted derivatives	Benzenesulfonamides	11071.9	17325.5	17510.8	23641.8	10830.6	7205.34	19066.4	5513.34	10590.5	5789.9	16459.1	3658.49	4965.73	4729.87	4979.9
M195T81	195.137	81.017	4-hexylresorcinol	[M+H]+	HMDB0032567		Benzenoids	Phenols	Benzenediols	72693.4	69592.5	30534.8	24650.7	45978.8	98379.2	66511.3	99077.5	120001	35986.4	75896.8	49472.2	24991.1	27699.4	27688.8
M107T49	107.048	49.186	4-hydroxybenzyl alcohol	[M+H-H2O]+	HMDB0011724	C17467	Benzenoids	Benzene and substituted derivatives	Benzyl alcohols	21141.9	34553.4	31987.8	10856.3	14592.2	28631.5	20247.9	24726.9	28728.6	22249	15006.8	10311.5	30495.9	30475.4	28715.4
M87T378	87.0433	378.259	4-hydroxybutanoic acid lactone	[M+H]+	HMDB0000549	C01770	Organoheterocyclic compounds	Lactones	Gamma butyrolactones	134275	130920	129031	40970.2	128425	149944	142013	224596	184540	242461	134722	231328	189276	189335	183837
M192T254	192.101	253.571	4-hydroxydebrisoquine	[M+H]+	HMDB0006468					3056.93	527.733	872.621	451.583	442.473	2259.65	962.36	6325.84	5567.74	4793.36	768.832	916.495	2548.17	2377.22	3570.49
M146T65	146.059	65.18	4-hydroxyquinoline	[M+H]+		C06343	Organoheterocyclic compounds	Quinolines and derivatives	Quinolones and derivatives	168412	171010	119528	35958.4	345592	218476	90816.5	166919	241632	365644	112583	176667	282526	240168	282994
M127T332	127.049	331.745	4-imidazoleacetic acid	[M+H]+	HMDB0002024	C02835	Organoheterocyclic compounds	Azoles	Imidazoles	9397.02	12134	12782.4	6002.81	14779.5	9378.86	11689.8	84.5425	10667.5	525.013	11208.2	6233.42	649.013	620.82	712.622
M139T190	139.049	190.186	4-imidazoleacrylic acid	[M+H]+	HMDB0000301	C00785	Organoheterocyclic compounds	Azoles	Imidazoles	14189.8	14066.9	14806.7	2766.86	12419	19550.1	6523.69	18758.2	12159.6	23888	7272.84	29692.1	23908.2	24409.3	24912.9
M172T208	172.096	208.06	4-iodosuberoylanilide hydroxamic acid	[M+H-C6H6NI]+			Benzenoids	Benzene and substituted derivatives	Anilides	5685.1	4111.2	4763.26	7674.28	2909.28	4549.08	4843.27	875.897	2969.63	2574.12	5531.32	1272.01	594.475	570.47	594.287
M223T113	223.094	113.35	4-isopropyl-4'-methylchalcone	[M+H-C3H6]+			Phenylpropanoids and polyketides	Linear 1,3-diarylpropanoids	Chalcones and dihydrochalcones	51316.7	97609	28597.2	19165.2	61223.3	78701.2	33927.8	129249	71096.7	42246.8	49456.3	47720.5	44784.7	44515.3	51945.3
M129T364_2	129.065	364.363	4-ketopimelic acid	[M+H-CH2O2]+			Organic acids and derivatives	Keto acids and derivatives	Medium-chain keto acids and derivatives	796279	812274	701555	357104	677875	689283	627149	321749	564255	449643	476386	290792	413348	413508	424577
M232T34	232.168	34.177	4-methyl-.alpha.-pyrrolidinobutiophenone	[M+H]+			Organic oxygen compounds	Organooxygen compounds	Carbonyl compounds	30856.8	27412.6	79790.3	30981.4	42503.9	39223.6	41221.7	53372.9	48801.9	43095.7	38346.6	41777.4	42701.4	40351.8	42664.5
M129T214	129.101	214.127	4-piperidinecarboxamide	[M+H]+	HMDB0000661	C00489	Organoheterocyclic compounds	Piperidines	Piperidinecarboxylic acids and derivatives	25385.7	41984.8	47917.4	26879.6	22557.4	14569.5	19315.1	8715.62	19460.5	7711.74	21975.8	9332.22	9058.16	8361.92	9157.93
M239T106	239.126	105.742	4'-methoxychalcone	[M+H]+	HMDB0032585		Phenylpropanoids and polyketides	Linear 1,3-diarylpropanoids	Chalcones and dihydrochalcones	22457.1	36898.8	4828.68	38261.7	28127.7	32597.6	12477.7	53066.1	38910.7	26409.5	18157.5	31301.5	17850.3	17829.3	19503.7
M475T415	475.141	415.32	4'-o-.beta.-d-glucosyl-5-o-methylvisamminol	[M+Na]+			Organoheterocyclic compounds	Benzopyrans	1-benzopyrans	7838.5	7366.75	6959.72	528.283	5602.66	8431.47	6771.57	14164.9	10337.6	14234.8	8122.16	17309.2	12457.9	12286	12286.4
M197T302	197.059	302.187	4',6'-dimethoxy-2'-hydroxyacetophenone	[M+H]+	HMDB0029645	C10726	Organic oxygen compounds	Organooxygen compounds	Carbonyl compounds	55779.4	59430	70485.7	26422.3	55797.8	67791.8	56680.5	61846	54947.2	63780.6	56248.7	63872.6	74496.7	69019.8	69107.4
M325T522	325.159	521.798	5-(galactosylhydroxy)-l-lysine	[M+H]+			Lipids and lipid-like molecules	Fatty Acyls	Fatty acyl glycosides	5742.58	4709.32	4377.69	3365.63	4713.7	4950.29	4970.43	17218.3	6715.84	6213.45	4823.64	8978.16	9326.88	9328.67	9518.59
M401T410_3	401.212	410.06	5-[5-(acetyloxymethyl)-1,2,4a-trimethyl-7-oxo-3,4,8,8a-tetrahydro-2h-naphthalen-1-yl]-3-methylpentanoic acid	[M+Na]+			Lipids and lipid-like molecules	Prenol lipids	Diterpenoids	87453.9	93087.8	86932.4	13087.4	116265	99088.6	87619.8	186883	177199	176464	90644.9	220344	178514	177553	187422
M118T479	118.085	479.417	5-Aminopentanoic acid	(M+H)+	HMDB0003355	C00431	Organic acids and derivatives	Carboxylic acids and derivatives	"Amino acids, peptides, and analogues"	226353	23624.2	255487	237866	233248	139544	312722	331598	215866	227274	232583	197650	293260	314820	292885
M118T385	118.085	384.938	5-aminovaleric acid	[M+H]+	HMDB0003355	C00431	Organic acids and derivatives	Carboxylic acids and derivatives	Amino acids, peptides, and analogues	226201	133037	189779	169101	117490	137010	268068	146871	140254	177213	146051	146840	142425	142424	139185
M160T389_2	160.132	388.507	5-aminovaleric acid betaine	[M+H]+			Lipids and lipid-like molecules	Fatty Acyls	Fatty acids and conjugates	3.47627e+06	3.60389e+06	4.28831e+06	654199	3.2951e+06	4.43866e+06	3.17653e+06	6.48261e+06	4.54152e+06	8.73665e+06	3.58704e+06	9.08667e+06	6.43644e+06	6.40149e+06	6.43612e+06
M256T411	256.094	410.558	5-Hydroxymethylcytidine	(M+H-H2O)+						31613.2	19135	18377.3	5486.09	25594.9	9302.76	30103.3	36653.7	31863.9	27210.1	20528.6	26519.7	28230.5	28232.9	29203.9
M219T417	219.097	417.117	5-L-Glutamyl-L-alanine	[M+H]+	HMDB0006248	C03740	Organic acids and derivatives	Carboxylic acids and derivatives	"Amino acids, peptides, and analogues"	130485	157968	281520	41029.9	278887	316688	248796	763726	362960	900790	218857	1.178e+06	580488	553051	552642
M191T256	191.083	255.865	5-methyl-5-phenylhydantoin	[M+H]+			Organoheterocyclic compounds	Azolidines	Imidazolidines	44191.8	32694.5	39547.2	7023.59	19234.7	25449.2	28484.8	34126.2	32320.9	47632.4	29119.8	47468.4	42186.3	41345.8	41344.9
M134T107	134.059	106.749	5-methylbenzotriazole	[M+H]+		C06473				946653	1.18894e+06	1.06076e+06	109672	783414	1.07936e+06	552770	2.0604e+06	897444	2.19962e+06	844710	3.77401e+06	1.54261e+06	1.54268e+06	1.56048e+06
M258T251	258.108	251.126	5-methylcytidine	[M+H]+	HMDB0000982		Nucleosides, nucleotides, and analogues	Pyrimidine nucleosides		836.155	1306.42	893.079	544.363	1307.93	1544.15	1790.98	5167.32	3160.96	7575.92	2236.39	8828.84	5261.58	5300.38	5395.15
M339T55	339.251	54.601	5,6-dihydroxy-8z,11z,14z-eicosatrienoic acid	[M+H]+	HMDB0002343		Lipids and lipid-like molecules	Fatty Acyls	Eicosanoids	15077.3	1.37807e+06	4709.61	2702.86	30326.2	683309	288731	262254	102552	208727	28432.4	98456.1	72471.8	74538.6	31873.3
M284T66	284.205	66.3945	5,9-dihydroxy-5,7,7-trimethyl-4,5a,6,8,8a,9-hexahydro-1h-azuleno[5,6-c]furan-3-one	[M+NH4]+			Lipids and lipid-like molecules	Prenol lipids	Terpene lactones	44746.9	34303.1	42448.6	3764.4	37910.2	54691.5	20604.5	45938.3	33690.1	29981.7	27974.7	35231.7	36562.7	36918.7	42617.9
M491T432	491.244	432.117	5.alpha.-androstan-3.alpha.,17.beta.-diol-o-3-.beta.-glucuronic acid	[M+Na]+			Lipids and lipid-like molecules	Steroids and steroid derivatives	Steroidal glycosides	2244.47	1610.72	1392.53	425.1	1563.65	1879.1	2690.44	3174.71	3208.33	5589.77	2567.05	6042.88	4814.24	4779.1	4814.23
M369T49	369.333	49.049	5.alpha.-cholest-7-en-3.beta.-ol	[M+H-H2O]+	HMDB0001170	C01189	Lipids and lipid-like molecules	Steroids and steroid derivatives	Cholestane steroids	30704.3	44724.9	30119	9453.91	21190.7	24958.4	20511.3	1194.59	49908.2	13166.5	22142.1	5763.75	9071.17	10301.8	9076.55
M575T433	575.214	432.886	5(s)-5-carboxystrictosidine	[M+H]+			Lipids and lipid-like molecules	Prenol lipids	Terpene glycosides	6882.44	6374.86	7189.6	881.84	5285.97	8624.12	6562.89	12452	9338.97	12176.3	6144.71	17626.9	12306.2	11903.9	11909.1
M375T396	375.197	395.775	5(s),14(r)-lipoxin b4	[M+Na]+		C06315	Lipids and lipid-like molecules	Fatty Acyls	Eicosanoids	53561.5	36728.8	39150.7	7469.72	32191.8	27936.6	54113	130693	90655.7	87391.4	73685.5	127382	85605	85640.8	80395.3
M415T38_2	415.211	37.612	6-[3-[(3,4-dimethoxyphenyl)methyl]-4-methoxy-2-(methoxymethyl)butyl]-4-methoxy-1,3-benzodioxole	[M-H2O+H]+						8.48394e+06	7.67273e+06	1.11288e+07	3.22124e+06	1.08001e+07	1.23556e+07	1.09317e+07	1.40138e+07	1.18355e+07	1.34401e+07	8.94342e+06	1.75655e+07	1.50401e+07	1.48421e+07	1.4838e+07
M393T80	393.238	79.79	6-ketoprostaglandin f1.alpha.	[M+Na]+	HMDB0002886	C05961	Lipids and lipid-like molecules	Fatty Acyls	Eicosanoids	20518.5	18231.7	11329.2	1486.1	23723.5	15843.1	8986.69	17167.5	4278.95	4715.77	3992.46	15208.4	12536.5	12350.5	12352.4
M129T419	129.101	418.574	6-methyl-5-hepten-2-ol	[M+H]+	HMDB0030030	C07288	Lipids and lipid-like molecules	Fatty Acyls	Fatty alcohols	72907.3	54179	50102	57361.6	53594.4	53580.4	47899.1	55353.3	71831.2	54948.3	137650	74498.3	60175.9	60177.4	59460
M329T69	329.156	69.0995	6a,7,8-trihydroxy-3-methyl-3,4,5,6,7,12a-hexahydro-2h-benzo[a]anthracene-1,12-dione	[M+H]+						38761.5	51983.5	29695.3	4535.79	50493.1	51278.2	42515.3	53912.3	103592	102590	45094.7	47497.4	30149.4	29735.8	29639.3
M492T432	492.121	432.406	6h-thieno[3,2-f][1,2,4]triazolo[4,3-a][1,4]diazepine-6-acetamide, 4-(4-chlorophenyl)-n-(4-hydroxyphenyl)-2,3,9-trimethyl-, (6s)-	[M+H]+						3329.15	3017.11	3210.23	929.709	3875.86	4956.75	3270.85	3916.57	3661.02	3705.54	2683.18	4186.72	4419.79	4308.35	4342.86
M480T52_1	480.231	52.2815	7-(3,4-dihydroxyphenyl)-1-(4-hydroxyphenyl)-5-[(2s,3r,4s,5r)-3,4,5-trihydroxyoxan-2-yl]oxyheptan-3-one	[M+NH4]+			Phenylpropanoids and polyketides	Diarylheptanoids	Linear diarylheptanoids	824.289	974.607	1709.35	14666.1	6602.71	1180.74	2232.05	523.745	4644.22	1189.09	2526.42	229.621	2570.74	2618.36	2593.61
M221T302	221.041	302.187	7-hydroxycoumarin-4-acetic acid	[M+H]+			Phenylpropanoids and polyketides	Coumarins and derivatives	Hydroxycoumarins	21342.2	15901.6	20853.6	4296.27	15650.6	15319.5	24362.7	25308.4	21133.4	18599.1	16976.7	23993.1	21882.1	22454.2	21823.6
M454T470	454.157	470.355	7-hydroxyfluphenazine	[M+H]+			Organoheterocyclic compounds	Benzothiazines	Phenothiazines	1395.71	956.869	1455.16	886.322	1400.93	2237	1561.72	1640.47	1763.71	2454.31	1686.5	2769.94	2195.9	2189.08	2101.9
M401T36	401.34	36.254	7.alpha.-hydroxy-4-cholesten-3-one	[M+H]+	HMDB0001993	C05455	Lipids and lipid-like molecules	Steroids and steroid derivatives	Cholestane steroids	1.35878e+06	1.24462e+06	1.94111e+06	348612	304480	1.13867e+06	894930	360190	355814	346661	333660	464294	416169	435621	435796
M152T382	152.07	381.563	8-methylcaffeine	[M+H-C2H3ON]+			Organoheterocyclic compounds	Imidazopyrimidines	Purines and purine derivatives	12789.6	13314.8	14232.8	5589.96	10336.1	12298.7	2730.66	22787.3	11750.2	16589.9	14328.8	20513.6	16467.7	16370.7	16370.4
M280T239	280.097	238.797	8-oxoerythraline	[M+H]+			Alkaloids and derivatives	Erythrina alkaloids	Erythrinanes	25389	6909.6	2216.37	1631.15	8134.1	2036.84	11438.2	43588.5	19092.5	16609.7	821.486	15964.2	13722	14084	14086.9
M497T257	497.089	256.794	9-methoxy-7-[4-[(2s,3r,4s,5s,6r)-3,4,5-trihydroxy-6-(hydroxymethyl)oxan-2-yl]oxyphenyl]-[1,3]dioxolo[4,5-g]chromen-8-one	[M+Na]+			Phenylpropanoids and polyketides	Isoflavonoids	Isoflavonoid O-glycosides	25102.9	25496.8	30670.4	27.9024	32305.4	30549.6	25761.5	39338.9	34435.8	32291.2	33735.9	54722.1	32989.2	32559.1	32555
M355T226	355.261	225.594	9s,11r-dihydroxy-15-oxo-13e-prostenoic acid	[M+H]+	HMDB0060045		Lipids and lipid-like molecules	Fatty Acyls	Eicosanoids	4015.85	3543.38	3854.83	690.038	2545.28	4630.44	2015.16	4429.32	3585.71	2995.29	2375.58	3228.14	1732.91	1738.33	1873.8
M603T468	603.213	468.164	Acanthoside b	[M+Na]+						1544.59	1326.61	1404.85	258.438	1084.92	1697.04	1195.2	3175.3	2263.7	2560.58	906.31	4917.27	2465.23	2465.16	2433.76
M633T474	633.218	474.405	Aceroside viii	[M+K]+			Phenylpropanoids and polyketides	Diarylheptanoids	Linear diarylheptanoids	151.946	662.864	536.769	188.297	614.772	1219.4	537.851	1516.74	1643.83	4043.61	1110.14	887.193	581.803	609.731	610.255
M252T212	252.122	211.66	Acetyl Tyrosine Ethyl Ester	(M+H)+						4404.77	4254.17	5412.54	2470.54	4600.91	4960.23	2766.26	709.971	2133.87	1086.32	2216.35	952.727	900.861	1098.71	1096.43
M810T437	810.128	436.916	Acetyl-coa	[M+H]+	HMDB0001206	C00024	Lipids and lipid-like molecules	Fatty Acyls	Fatty acyl thioesters	1891.12	4394.55	2318.18	275.886	2204.84	1964.65	5486.11	7863.62	1867.49	2539.22	971.491	4209.5	5798.03	5380.38	5378.05
M204T309_1	204.123	308.808	Acetylcarnitine	[M+H]+		C02571	Lipids and lipid-like molecules	Fatty Acyls	Fatty acid esters	2.35262e+06	2.1561e+06	1.95077e+06	8.66212e+06	1.81249e+06	1.85851e+06	1.42569e+06	1.26176e+06	1.26564e+06	1.40276e+06	1.17335e+06	1.30568e+06	1.59635e+06	1.57051e+06	1.5963e+06
M146T380	146.117	380.424	Acetylcholine	[M]+	HMDB0000895	C01996	Organic nitrogen compounds	Organonitrogen compounds	Quaternary ammonium salts	2.44514e+06	2.44993e+06	2.55742e+06	366874	2.25474e+06	2.93464e+06	2.46232e+06	5.11971e+06	3.52197e+06	5.18237e+06	2.35325e+06	6.16688e+06	4.42163e+06	4.45789e+06	4.45696e+06
M542T278	542.132	278	Acrinathrin	[M+H]+		C18408	Lipids and lipid-like molecules	Fatty Acyls	Fatty acid esters	366.605	249.679	365.912	50.3391	253.44	148.103	461.318	8537.44	312.45	3353.01	311.287	17361.7	1375.19	1390.91	1276.89
M628T431	628.338	431.448	Actinomycin d	[M+2H]2+	HMDB0015105	C06770	Organic acids and derivatives	Peptidomimetics	Depsipeptides	6439.92	3841.9	7927.17	1732.69	5295.9	9411.74	18456	41015.6	15697.2	20500.9	11397.8	45724.2	21587.7	21332.8	21310.8
M136T162_2	136.062	161.701	Adenine	[M+H]+	HMDB0000034	C00147	Organoheterocyclic compounds	Imidazopyrimidines	Purines and purine derivatives	2.06039e+07	2.22358e+07	3.4591e+07	9.44493e+06	3.34823e+07	3.40027e+07	1.7951e+07	3.51298e+07	2.33946e+07	5.19586e+07	2.07985e+07	8.07679e+07	4.65378e+07	4.55377e+07	4.5522e+07
M268T172_1	268.104	171.514	Adenosine	[M+H]+	HMDB0000050	C00212	Nucleosides, nucleotides, and analogues	Purine nucleosides		2.47869e+07	3.24507e+07	4.88084e+07	1.00682e+07	4.84048e+07	6.07187e+07	2.57173e+07	6.25019e+07	3.60235e+07	1.17904e+08	3.0708e+07	1.66599e+08	8.49541e+07	8.26193e+07	8.26767e+07
M374T411	374.036	410.655	Adenosine 2',3'-cyclic monophosphate	[M-H+2Na]+			Nucleosides, nucleotides, and analogues	Purine nucleotides	Cyclic purine nucleotides	11916.9	16675.9	3378.18	397.918	950.856	1054.91	644.478	2355.67	507.286	634.802	1081.51	596.076	1198	1240.68	1199.59
M370T436	370.05	436.034	Adenosine 3'-monophosphate	[M+Na]+	HMDB0003540	C01367	Nucleosides, nucleotides, and analogues	Ribonucleoside 3'-phosphates		111772	93255.6	87290	32715.7	78176.5	89440.5	41674.2	111405	81237.1	121741	58006	186688	141555	142154	142159
M312T282	312.059	281.7	Adenosine 3',5'-cyclic monophosphate	[M+H-H2O]+	HMDB0000058	C00575	Nucleosides, nucleotides, and analogues	Purine nucleotides	Cyclic purine nucleotides	53494.4	47508.1	48420.6	22379	62685.3	47671.1	47467.6	10121.7	35736.4	4933.46	44070.6	5376.13	16480.7	15487.6	16478
M428T444	428.034	444.093	Adenosine 5'-diphosphate	[M+H]+	HMDB0001341	C00008	Nucleosides, nucleotides, and analogues	Purine nucleotides	Purine ribonucleotides	347192	272053	171492	97195.4	161856	154044	134669	218338	172096	211163	142823	264285	222852	214766	214765
M560T434	560.076	433.606	Adenosine 5'-diphosphoribose	[M+H]+	HMDB0001178	C00301	Nucleosides, nucleotides, and analogues	Purine nucleotides	Purine nucleotide sugars	15971.7	17087.1	15734.1	10851	16341.1	17057.4	14622.5	24399.9	17277	24391.9	16276.4	32850.7	22414.8	22500.5	22500.2
M348T437	348.07	436.589	Adenosine 5'-monophosphate	[M+H]+	HMDB0000045	C00020	Nucleosides, nucleotides, and analogues	Purine nucleotides	Purine ribonucleotides	5.37028e+06	4.98019e+06	4.67672e+06	1.57904e+06	4.37298e+06	4.74592e+06	2.16015e+06	5.26858e+06	4.08531e+06	5.86542e+06	2.97904e+06	9.28087e+06	6.96852e+06	6.99379e+06	6.99378e+06
M368T416	368.022	415.567	Adenosine, cyclic 3',5'-[hydrogen [p(s)]-phosphorothioate]	[M+Na]+			Nucleosides, nucleotides, and analogues	Nucleoside and nucleotide analogues	3',5'-cyclic purine nucleoside phosphorothioates	7516.9	15669.3	1711.64	801.823	1208.3	1810.39	1427.45	1797.51	1035.12	955.143	2100.7	1236.44	1496.85	1496.86	1429.52
M573T379	573.142	379.168	Adenylyl(3'-5')cytidine	[M+H]+			Nucleosides, nucleotides, and analogues	(3'->5')-dinucleotides and analogues	(3'->5')-dinucleotides	1582.72	473.743	755.894	259.738	526.671	1499.86	1710.03	1775.53	849.687	1133.7	738.55	2650.36	1484.98	1486.33	1540.03
M524T476	524.054	475.69	ADP-ribose	(M+H-2H2O)+	HMDB0001178	C00301	Nucleosides, nucleotides, and analogues	Purine nucleotides	Purine nucleotide sugars	24741.9	62456	16553.9	15158.7	50918.8	60065.7	50192.3	74410.7	64931.9	71839.4	48753.1	72774.8	79719.5	78292.3	79691.3
M313T461	313.063	460.621	Aflatoxin b1	[M+H]+	HMDB0006552	C06800	Phenylpropanoids and polyketides	Coumarins and derivatives	Furanocoumarins	6113.37	4347.69	4817	806.25	3870.24	6564.07	3509.93	16071.9	7740.62	13409.5	5406.95	25638.8	13473.1	13670.1	13670.7
M353T56	353.047	55.716	Aflatoxin g2	[M+Na]+	HMDB0030475	C16754	Phenylpropanoids and polyketides	Coumarins and derivatives	Furanocoumarins	7092.95	9614.86	9818.29	2459.83	9615.22	8778.31	11125.9	18055.4	10091.8	7365.11	31239	6740	14518.8	14505.5	17766.1
M144T261	144.064	260.982	Ala-Ala	[M+H-NH3]+	HMDB0000303	C00398	Organoheterocyclic compounds	Indoles and derivatives	Tryptamines and derivatives	31489.9	97172.5	46187.1	9356.62	36907.6	59460.2	61570.2	42048.6	29613.2	181351	35149.1	209405	65418.7	67277	65413.9
M317T437	317.192	437.405	Ala-Ala-Arg	[M+H]+			Organic acids and derivatives	Carboxylic acids and derivatives	Amino acids, peptides, and analogues	7196.65	19100.6	8017.7	913.032	7002.04	11156.3	8928.46	19706.7	14840.8	33383.8	10269.2	52349.7	18974.8	18425.7	18981.3
M203T242	203.139	241.545	Ala-Ile	[M+H]+			Organic acids and derivatives	Carboxylic acids and derivatives	Amino acids, peptides, and analogues	6169.73	855.272	333.622	2356.47	2677.4	970.049	1944.9	4028.49	6102.27	3483.91	49.8102	2104.45	4726.38	5523.53	4722.7
M292T456	292.102	456.146	Alanap	[M+H]+		C18869				31105.2	19449.6	18755.4	10911.1	32824.5	11940.5	40237.5	74232.4	56731.3	79836.1	42752.5	18252.7	58378	57304.9	57323.8
M90T367	90.0544	367.407	Alanine	[M+H]+	HMDB0000161	C00041	Organic acids and derivatives	Carboxylic acids and derivatives	Amino acids, peptides, and analogues	661334	399754	425479	178390	419733	732647	416574	498024	475173	540001	604971	526493	495962	495963	494517
M503T459	503.135	458.743	Albiflorin	[M+Na]+		C17457	Lipids and lipid-like molecules	Prenol lipids	Terpene glycosides	1571.05	769.606	864.056	424.933	1047.51	1554.35	825.61	3240.11	2150.82	2510.38	1210.9	2898.09	2480.36	2482.76	2435.47
M370T260	370.175	259.667	Allocryptopine	[M+H]+	HMDB0030583					8269.12	3300.43	8044.42	392.676	3336.43	8102.51	1237.26	33867.7	7226.87	27378.7	1473.33	48466.9	27944.8	32042.5	32022.7
M243T481	243.025	480.794	alpha-D-Glucose 1-phosphate	(M+H-H2O)+	HMDB0001586	C00103	Organic oxygen compounds	Organooxygen compounds	Carbohydrates and carbohydrate conjugates	168212	105397	137930	22640.7	103440	139180	53071.3	102307	104518	121230	33818.5	269808	173538	173103	173103
M190T477	190.082	477.231	alpha-Guanidinoglutaric Acid	(M+H)+						2325.65	1395.22	482.234	1712.79	1189.7	1626.85	1292.67	2179.63	1440.13	1477.98	1548.45	1680.17	1253.35	1076.8	1257.12
M271T331	271.073	330.944	Alpinetin	[M+H]+			Phenylpropanoids and polyketides	Flavonoids	O-methylated flavonoids	13043.9	22872.3	12757.7	3908.93	2192.73	5696.54	4124.07	8419.06	5448.25	8573.29	13039	9493.72	8788.71	8627.2	8627.35
M568T283	568.287	283.207	Amikacin	[M+H-H2O]+	HMDB0014622	C06820	Organic oxygen compounds	Organooxygen compounds	Carbohydrates and carbohydrate conjugates	4888.46	4223.61	8190.53	425.168	3155.62	3193.11	31285.6	4616.67	8613.47	1223.61	10187.1	2575.99	5740.22	5986.43	5742.76
M466T453	465.981	452.872	Amisulbrom	[M+H]+		C18581	Organoheterocyclic compounds	Indoles and derivatives	Indoles	8409.96	11289.5	10412.8	4082.57	6526.74	15502.7	13414.6	9990.09	10487.4	10071.2	10694.1	7259.3	11092.2	10527.3	10530.3
M160T336	160.033	336.111	Ampicillin	[M+H-C10H10O2N2]+	HMDB0014559	C06574	Organoheterocyclic compounds	Lactams	Beta lactams	25727.1	30105.7	29852.8	1493.98	22315.9	39981.6	21899.6	153624	31748.5	111987	18559.8	510200	95058.9	93259	95109.9
M528T423	528.189	422.823	Amprenavir	[M+Na]+	HMDB0014839	C08086	Benzenoids	Benzene and substituted derivatives	Benzenesulfonamides	7216.06	4825.88	5961.82	3083.92	5610.29	4933.93	3837.45	7123.04	6675.51	10014.4	4098.14	8743.61	7208.51	7202.64	7701.02
M509T402	509.27	401.509	Andrastin a	[M+Na]+			Lipids and lipid-like molecules	Steroids and steroid derivatives	Steroid esters	1254.3	1199.6	1815.94	529.692	1307.68	3556.84	3404.69	6115.9	2437.38	4390.7	2947.69	8767.38	4438.13	4666.58	4436.44
M388T202	388.303	202.359	Androst-5-en-17-one, 3-[2-(diethylamino)ethoxy]-, (3.beta.)-	[M+H]+			Lipids and lipid-like molecules	Steroids and steroid derivatives	Androstane steroids	23858.1	11983.2	14195.3	6043.53	7394.01	11195.2	21090.7	34516.2	21244.4	32988.2	26437.1	15507.1	30053.5	29993.9	30313.1
M484T506	484.274	506.321	Androstan-3-ol-17-one 3-glucuronide	[M+NH4]+	HMDB0004484	C11136	Lipids and lipid-like molecules	Steroids and steroid derivatives	Steroidal glycosides	63968.6	64627.9	63788.8	15196.1	58715.8	80662.2	50750.9	117751	73293.1	103066	50926.4	145500	110270	109090	109091
M275T35_2	275.236	35.392	Androstane-3,17-diol, (3.beta.,5.alpha.,17.beta.)-	[M+H-H2O]+	HMDB0000493	C12525	Lipids and lipid-like molecules	Steroids and steroid derivatives	Androstane steroids	57134.3	50535.6	46280.2	11325.8	67181.1	61734.7	60673.1	93417.3	95083.4	107374	56619.6	99095.8	91623.6	84546.4	91712.2
M94T297	94.0641	296.595	Aniline	[M+H]+	HMDB0003012	C00292	Benzenoids	Benzene and substituted derivatives	Aniline and substituted anilines	109224	96602.6	109727	15719.8	109647	83427.3	162590	275672	203462	221171	186793	305704	188256	185943	185943
M288T438	288.117	437.507	Anisomycin	[M+Na]+		C11281	Benzenoids	Phenol ethers	Anisoles	22504	9991.92	11023	4821.6	7012	29889	14505.4	29011.8	13701.4	18570.3	23581.3	24737.5	34875.8	29840.2	34869.4
M324T379	324.116	378.52	Anorexigenic peptide	[M+H]+			Organic acids and derivatives	Carboxylic acids and derivatives	Amino acids, peptides, and analogues	2490.05	3886.06	2814.01	1188.43	2775.82	2630.74	1806.4	3757.52	2831.48	2580.55	2172.17	3429.2	3848.31	3850.17	4151.41
M241T379	241.154	379.018	Anserine	[M+H]+	HMDB0000194	C01262	Organic acids and derivatives	Peptidomimetics	Hybrid peptides	409214	425527	401130	64628.7	491177	536489	445798	1.06353e+06	728604	1.12844e+06	549376	1.70488e+06	946894	931093	946882
M623T484	623.368	483.632	Antipain	[M+H+H2O]+			Organic acids and derivatives	Carboxylic acids and derivatives	Amino acids, peptides, and analogues	1660.08	3256.85	10170.3	4951.51	5565.8	14895.4	16862.9	37751.1	12158.6	21302	9703.61	13548	8482.92	8654.4	7840.18
M565T170	565.165	170.274	Apiin	[M+H]+	HMDB0031342	C04858	Phenylpropanoids and polyketides	Flavonoids	Flavonoid glycosides	2825.09	180.308	324.285	3001.97	3222.58	5511.19	2433.06	1586.93	82.2258	17032.9	2433.06	18600.1	6130.24	5569.3	6123.94
M535T473	535.16	473.102	Aprepitant	[M+H]+	HMDB0014811	C21555	Organoheterocyclic compounds	Oxazinanes	Morpholines	299.756	190.26	574.007	397.557	666.507	1258.77	1078.38	952.009	1664.31	2318.11	1017.96	2836.3	1487	1487.96	1690.11
M365T150	365.275	150.059	Arachidonic Acid (peroxide free)	(M+CH3COO+2H)+	HMDB0001043/HMDB0060102	C00219	Lipids and lipid-like molecules	Fatty Acyls	Fatty acids and conjugates	1207.88	1096.22	1405.01	1900.39	1977.77	1690.62	2151.54	4240.38	2805.27	1978.77	1676.76	14311.5	8656.48	6959.39	8498.08
M318T119	318.277	118.838	Arachidonoyl-n-methylamide	[M+H]+			Lipids and lipid-like molecules	Fatty Acyls	Fatty amides	50456.4	55788.6	52261.6	9223.89	63622.8	69866.7	246828	115465	53602.2	25194.9	32619.6	13276.3	35711.7	48860.3	48868.2
M785T139_1	784.583	138.507	Arachidonoylthiophosphorylcholine	[M+H]+			Organic nitrogen compounds	Organonitrogen compounds	Quaternary ammonium salts	1.60784e+07	1.72539e+07	1.98095e+07	8.98935e+06	6.77785e+06	2.05046e+07	1.08127e+07	5.11703e+06	8.33183e+06	4.1145e+06	8.7365e+06	6.58241e+06	3.02535e+06	3.21036e+06	3.19648e+06
M356T56	356.35	56.379	Arachidoyl ethanolamide	[M+H]+			Organic nitrogen compounds	Organonitrogen compounds	Amines	83990	82872.5	90674	36583.9	30286.9	88755.1	55975	28100	14417	24850.2	41111.5	2529.33	32406.5	33383.6	32426.1
M417T410	417.207	410.007	Arenobufagin	[M+H]+		C20035	Lipids and lipid-like molecules	Steroids and steroid derivatives	Steroid lactones	29419.7	26809.3	30537	4299.23	25901.7	35000.4	34300.3	67371.3	40852.8	69607.9	31737.3	88534.1	59459.6	58777	59468.2
M289T462	289.161	462.14	Arg-Asn	[M+H]+			Organic acids and derivatives	Carboxylic acids and derivatives	Amino acids, peptides, and analogues	6408.64	4056.54	2209.08	710.846	4805.47	4634.08	7457.64	5875.28	17029.6	9565.76	4543.22	8502.12	9329.33	9358.45	9244.36
M290T502	290.145	501.81	Arg-asp	[M+H]+			Organic acids and derivatives	Carboxylic acids and derivatives	Amino acids, peptides, and analogues	21470	21023.1	20785.3	4421.33	11387	10947.7	8577.31	34743.9	27894.6	34038.6	9354.93	36699.8	31888.7	33303	33359.4
M303T75	303.177	74.697	Arg-Gln	[M+H]+			Organic acids and derivatives	Carboxylic acids and derivatives	Amino acids, peptides, and analogues	21998.9	27622.1	5415.77	3874.61	27829	9504.41	29298	35886.2	64244.7	48460	25400.4	24778.6	26775.8	27861.9	26763.2
M304T484	304.161	484.213	Arg-Glu	(M+H)+						4534.21	4693.77	5285.53	3132.6	4334.79	6843.37	32568.4	19143.5	25714.5	20632.3	23556	23791.3	12180.6	12501.2	12177.3
M440T533	440.284	532.894	Arg-His-Lys	[M+H]+			Organic acids and derivatives	Carboxylic acids and derivatives	Amino acids, peptides, and analogues	1124.85	395.426	766.796	442.415	756.378	1050.66	876.517	2667.79	2673.72	2300.4	856.596	3630.99	1461.19	1458.02	1584.46
M328T429_2	328.149	428.896	Arg-Met	(M+Na)+						11565.9	9960.28	11486.6	4056.14	8904.08	13191.7	14005.3	29703.6	20623.3	29339.8	12546.3	42127.3	26343.5	26122.5	26126.5
M360T471	360.138	470.797	Arg-Phe	(M+K)+						2966.48	3474.14	3433.91	5223.34	4997.68	5748.17	3037.29	20874.2	9910.39	15045.7	8117.49	38943.9	11974.4	11980.4	13278.9
M369T464_2	369.222	464.167	Arg-Pro-Pro	[M+H]+			Organic acids and derivatives	Carboxylic acids and derivatives	Amino acids, peptides, and analogues	3159.18	7993.42	2317.03	737.056	3886.51	3783.19	5240.29	10920.9	4260.73	12220.6	5011.91	13442.8	7591.6	7619.21	7146.13
M262T432	262.15	432.156	Arg-Ser	[M+H]+			Organic acids and derivatives	Carboxylic acids and derivatives	Amino acids, peptides, and analogues	11274.1	10705.8	16706.9	7687.2	9263.49	7495.22	28218.3	20984	32731.9	25095.8	35962.5	23654.8	15207	15184.1	15876.9
M291T477	291.129	476.764	Argininosuccinic acid	[M+H]+	HMDB0000052	C03406	Organic acids and derivatives	Carboxylic acids and derivatives	Amino acids, peptides, and analogues	148853	107517	130028	8495.26	57938.1	158905	80945.7	397990	167033	420952	98710.5	722328	302934	300137	300507
M453T163	453.339	163.497	Asiatic acid	[M+H-2H2O]+	HMDB0035782	C08617	Lipids and lipid-like molecules	Prenol lipids	Triterpenoids	12346.3	7737.31	4633.67	1275.74	5172.83	9910.69	19050.7	38258.6	11827.1	20578.3	6947.14	7957.78	13029.2	12860.7	15296.9
M145T70	145.075	69.884	Asn-Arg	[M+2H]2+			Organic acids and derivatives	Carboxylic acids and derivatives	Amino acids, peptides, and analogues	23259.6	20408.9	31660.6	6226.44	21747.2	26917.6	14877.8	36299.8	18724.3	33592.8	20720.1	47819.9	39747.9	38145.1	38336.8
M205T35	205.085	34.682	Asp-Ala	[M+H]+			Organic acids and derivatives	Carboxylic acids and derivatives	Amino acids, peptides, and analogues	666774	463496	473854	451585	939497	536913	1.30275e+06	1.07594e+06	830216	1.14831e+06	679591	977306	1.31625e+06	1.19972e+06	1.20133e+06
M306T472	306.092	472.285	Asp-Gly-Asp	[M+H]+			Organic acids and derivatives	Carboxylic acids and derivatives	Amino acids, peptides, and analogues	14723.7	7360.74	10400.3	2227.96	7998.28	12134	8835.88	23960.4	16692.8	22878.6	11405.1	42834.5	22978.7	22677.3	22987
M375T414	375.223	413.954	Asp-Leu-Lys	[M+H]+			Organic acids and derivatives	Carboxylic acids and derivatives	Amino acids, peptides, and analogues	3058.97	3926.31	7811.19	1695.88	6217.02	7984.75	4335.68	9831.18	5598.63	17488.9	12655.7	20646.5	14087.7	14114.8	12558.7
M231T405	231.097	404.89	Asp-Pro	[M+H]+	HMDB0002335		Organic acids and derivatives	Carboxylic acids and derivatives	Amino acids, peptides, and analogues	60884.6	58370.1	24581.4	4569.38	15322	27561.3	27187	41279.2	39617.3	130883	24444	161068	47016.3	46999.7	46225.2
M387T448	387.196	448.019	Asp-Pro-Arg	[M+H]+			Organic acids and derivatives	Carboxylic acids and derivatives	Amino acids, peptides, and analogues	5325.99	3296.36	6196.94	1834.38	4328.39	5654.98	7214.69	8436.68	8972.69	23458.9	6665.43	21890.4	9035.42	10539.4	8995.47
M389T418	389.214	418.156	Asp-Val-Arg	[M+H]+			Organic acids and derivatives	Carboxylic acids and derivatives	Amino acids, peptides, and analogues	5805.41	5254.95	5496.87	946.615	5929.43	6207.39	1544.6	6794.74	9005.95	16402.9	7201.01	5812.24	5808.9	9006.22	8465.32
M807T292_2	807.459	292.161	Astragaloside iii	[M+Na]+		C08924	Lipids and lipid-like molecules	Steroids and steroid derivatives	Steroidal glycosides	740.012	790.869	4504.22	504.42	4794.5	5735.52	15547.9	37859.5	1649.24	7488.12	4309.05	24235.2	6214.28	5446.92	6142.47
M559T467	559.281	466.651	Atorvastatin	[M+H]+	HMDB0005006	C06834	Organoheterocyclic compounds	Pyrroles	Substituted pyrroles	2728.86	1922.01	3601.48	972.276	3087.55	6980.67	4474.68	10228	5003.54	10731	3316.76	9462.39	6781.19	6679.35	6784.76
M367T411_1	367.119	411.391	Atovaquone	[M+H]+	HMDB0015249	C06835	Benzenoids	Naphthalenes	Naphthoquinones	23736.3	23654.9	56145.8	13553	22601.1	60420.3	22922.4	33148	31131.6	42352.4	27219.5	47060.8	34056.8	32501.1	34065.5
M122T41	122.095	41.191	Auramine o	[M+H-C9H10N2]+		C19193	Benzenoids	Benzene and substituted derivatives	Diphenylmethanes	28622.9	15836.7	45866.5	48721	163768	44462.7	67156	54306.8	83877.3	66122	126461	110227	60284.9	60275.7	58103.8
M436T302	436.074	301.696	Aztreonam	[M+H]+	HMDB0014499	C06840	Organoheterocyclic compounds	Lactams	Beta lactams	4687.59	5344.12	6824.63	643.831	5310.94	10528.7	5057.48	6374.31	6268.08	7442.5	5179.55	7847.6	7989.27	7514.15	8188.65
M838T398_2	838.428	397.741	Bafilomycin b1	[M+Na]+						2313.73	3632.85	2959.72	589.261	2161.1	3779.13	2320.98	2795.76	2197.47	6488.67	3087.86	6825.54	4787.29	4800.52	5038.6
M409T39	409.16	38.7255	Beclomethasone	[M+H]+	HMDB0013609	C06842	Lipids and lipid-like molecules	Steroids and steroid derivatives	Hydroxysteroids	19614.4	22690.3	21823.7	76526.4	69364	16274	68202.9	27100.5	40147.7	18195.7	67460.8	43637.5	25285.1	24413.2	25265.8
M304T113	304.299	113.424	Benzalkonium chloride (c12)	[M]+		C06523	Benzenoids	Benzene and substituted derivatives	Phenylmethylamines	1.23116e+06	1.0558e+06	1.11547e+06	303968	633164	1.87187e+06	5.35156e+07	9.78998e+06	837271	861556	704251	196877	795612	784600	784581
M625T431	625.299	431.017	Benzamide, n-[2-(dimethylamino)ethyl]-n-methyl-4-[[[[4-[4-(4-morpholinyl)-7-(2,2,2-trifluoroethyl)-7h-pyrrolo[2,3-d]pyrimidin-2-yl]phenyl]amino]carbonyl]amino]-	[M+H]+			Benzenoids	Benzene and substituted derivatives	N-phenylureas	1785.92	1455.23	2466.6	760.7	1640.95	3149.27	3404.9	5601.09	2940.4	2951.71	2113.22	5803.85	2900.75	2842.78	2967.89
M569T292	569.43	292.272	Benzenepropanoic acid, 3,5-bis(1,1-dimethylethyl)-4-hydroxy-, octadecyl ester	[M+K]+			Lipids and lipid-like molecules	Fatty Acyls	Fatty alcohol esters	41932.2	27184.3	25826.7	27369.2	31481	32310.8	43363.5	26102.3	25573.4	60163.1	34236.9	24166.6	35966.2	43881.9	44131.4
M120T190	120.079	190.387	Benzotriazole	[M+H]+						21049.5	20565.9	23491.4	5548.75	19176.5	23457.9	23964.1	30289.4	24810.4	23995.9	16229.6	32883.3	25296.1	25084.3	25129
M290T333	290.153	332.714	Benzoylecgonine	[M+H]+		C10847	Benzenoids	Benzene and substituted derivatives	Benzoic acids and derivatives	2662.48	1522.82	1240.69	1323.53	2541.77	839.017	1711.81	99.4804	933.288	136.077	1394.2	790.956	216.073	190.047	190.3
M240T208	240.158	207.795	Benzphetamine	[M+H]+	HMDB0015003	C07538	Benzenoids	Benzene and substituted derivatives	Phenethylamines	24969.1	20119.6	7763.16	2328.1	10957.7	5321.64	11088.6	7617.53	6132.04	3990.95	3765.55	2858.12	5566.37	5932.3	5416.12
M91T154	91.0533	153.572	Benzyl alcohol	[M+H-H2O]+	HMDB0003119	C00556	Benzenoids	Benzene and substituted derivatives	Benzyl alcohols	38387.2	33846.3	23827.8	37128.7	27473.6	35065.5	33233.6	27407.5	40504.1	23923.5	32867.7	3568.23	22786.2	22772	15371.3
M313T124	313.155	123.853	Benzyl butyl phthalate	[M+H]+		C14211	Benzenoids	Benzene and substituted derivatives	Benzoic acids and derivatives	15980.1	28001.1	19385	2670.82	14178.3	19175.9	9721.44	19719.4	20586.1	42157.2	9466.18	48900.2	34793.2	32498.9	32541.5
M90T452	90.054	451.714	beta-Alanine	(M+H)+	HMDB0000056	C00099	Organic acids and derivatives	Carboxylic acids and derivatives	"Amino acids, peptides, and analogues"	18777.1	15271.8	6328.63	2667.04	11971.4	8294.34	13329.3	25938.5	18421.2	10130.2	14774.4	16789.9	21496.1	21616.4	23061.3
M118T277	118.086	277.438	Betaine	[M+H]+	HMDB0000043	C00719	Organic acids and derivatives	Carboxylic acids and derivatives	Amino acids, peptides, and analogues	2.028e+06	1.91285e+06	1.88347e+06	1.25687e+06	1.9401e+06	2.17579e+06	2.67535e+06	648115	2.66225e+06	1.50787e+06	2.24333e+06	368221	2.12522e+06	2.11425e+06	2.12966e+06
M355T153	355.171	153.006	Betamethasone 9,11-epoxide	[M+H-H2O]+			Lipids and lipid-like molecules	Prenol lipids	Monoterpenoids	10386.1	16977.8	3065.85	435.334	18245	12978.9	14535.2	10592.7	22491	6314.94	4997.89	1185.56	5022.53	4850.68	4871.07
M439T46	439.34	45.865	Betulinic acid	[M+H-H2O]+	HMDB0030094	C08619	Lipids and lipid-like molecules	Prenol lipids	Triterpenoids	13813.7	22031.6	9295.45	16214.6	31197.7	24156.7	52725.7	19200.1	72976.1	21490.7	54594.6	1898.52	16291.5	16012.4	17013.1
M427T151	427.386	150.626	Bis(2-ethylhexyl) sebacate	[M+H]+			Lipids and lipid-like molecules	Fatty Acyls	Fatty acid esters	60886.8	41075.3	85166.8	810.718	853.674	280330	2586.32	578800	1280.03	447910	1586.64	49015.8	465191	444601	445407
M552T278	552.186	277.729	Blood group a trisaccharide	[M+Na]+			Organic oxygen compounds	Organooxygen compounds	Carbohydrates and carbohydrate conjugates	7904.46	8914.19	8620.53	312.683	7736.99	8834.27	5884.06	1491.49	7608.33	3039.58	5392.53	395.032	7519.98	6939.87	6946.83
M345T376	345.045	375.519	Boscalid	[M+H+2i]+		C18547	Benzenoids	Benzene and substituted derivatives	Anilides	1730.01	1739.52	1579.8	378.763	1218.55	3225.39	1131.94	3578.28	1985.79	4401.44	1449.09	6300.63	2820.09	2865.69	2805.49
M532T424	532.161	424.351	Bosutinib	[M+H+2i]+	HMDB0240205		Organoheterocyclic compounds	Quinolines and derivatives	Aminoquinolines and derivatives	3914.11	3279.52	4264.8	546.69	3826.79	3078.74	4008.22	8456.59	5931.94	9978.33	5334.52	8759.82	6339.38	5976.08	6346.07
M337T256	337.168	255.549	Butyl phthalyl butylglycolate	[M+H]+			Benzenoids	Benzene and substituted derivatives	Benzoic acids and derivatives	7603.19	9784.98	10870	2842.02	4912.07	18725.6	3864.01	4365.45	8426.85	9173.64	6136.47	5033.38	6921.72	6614.02	6849.72
M288T41	288.289	40.961	C17-sphinganine	[M+H]+			Organic nitrogen compounds	Organonitrogen compounds	Amines	543582	1.53783e+06	642407	971694	3.08768e+06	783105	3.34644e+06	3.30113e+06	3.0169e+06	3.03131e+06	4.50326e+06	1.28217e+06	3.53898e+06	3.50509e+06	3.50431e+06
M474T433	474.29	432.887	Cabergoline	[M+Na]+	HMDB0014393	C08187	Alkaloids and derivatives	Ergoline and derivatives	Lysergic acids and derivatives	4581.1	2826.72	4720.51	893.804	4095.57	4303.66	5224.82	11013.9	6529.52	11845.7	3972.89	13447.7	10446.9	10028.2	10442
M195T97	195.098	96.89	Caffeine	[M+H]+	HMDB0001847	C07481	Organoheterocyclic compounds	Imidazopyrimidines	Purines and purine derivatives	61018.1	103939	16694.1	26083.2	87286.7	132657	43008.5	270703	145014	24491.1	46252.2	17441.7	12181.2	12233.3	13261.2
M488T433	488.241	432.875	Calcimycin	[M+H-2H2O]+		C11309				12036.7	18686.9	11596.1	1439.6	9770.17	15582.5	29993.5	40864.5	16409.9	24138.2	17543.9	50578.8	30701.6	26453.8	30682
M363T50	363.287	49.752	Calcitriol	[M+H-3H2O]+		C01673	Lipids and lipid-like molecules	Steroids and steroid derivatives	Vitamin D and derivatives	75543.9	96525.6	69061.2	26721.9	70048.6	69798.9	65792.7	48943.8	129435	15708.1	55734.7	69275.7	10578.6	8902.7	9125.79
M218T77_1	218.092	76.904	Captopril	[M+H]+	HMDB0015328	C06867	Organic acids and derivatives	Carboxylic acids and derivatives	Amino acids, peptides, and analogues	101219	98165.7	118043	30730.4	89949.3	123725	53560.8	189664	88646.4	133916	110332	206675	123119	122710	109844
M301T376	301.082	375.721	Carboxytolbutamide	[M+H]+	HMDB0041849		Benzenoids	Benzene and substituted derivatives	Benzenesulfonamides	5233.49	6432.22	9823.68	1055.3	6251.04	9731.3	7447.9	20198.4	9163.64	21063.9	7017.87	31704.4	15772.2	15491.2	15490.4
M518T434	518.147	434.219	Catechin pentaacetate	[M+NH4]+			Phenylpropanoids and polyketides	Flavonoids	Flavans	1506.37	1156.62	1719.48	363.815	923.377	1973.65	2090.54	5023.12	3510.1	4623.91	1349.65	4432.63	4261.74	4262.91	4433.41
M121T239	121.1	239.304	Cedrol	[M+H-C6H14O]+		C09631	Lipids and lipid-like molecules	Prenol lipids	Sesquiterpenoids	16067.1	4169.85	2414.52	1487.98	6741.71	3152.57	9970.01	49993.8	17308.4	23381.8	3149.39	24946	10850.8	10857.1	10497.5
M438T458	438.217	458.324	Chemotatic peptide	[M+H]+		C11596	Organic acids and derivatives	Carboxylic acids and derivatives	Amino acids, peptides, and analogues	32030.3	28940.5	33318.6	6627.46	27720.2	36219.6	28644.7	54747.1	41969	56735.4	31829.8	62817.7	50274.2	50280.9	49078.4
M410T153	410.324	152.763	Chenodeoxycholate	(M+NH4)+	HMDB0000518	C02528	Lipids and lipid-like molecules	Steroids and steroid derivatives	"Bile acids, alcohols and derivatives"	11622.7	13138.5	11598.5	1953.14	13148.6	14177.4	13257.2	20047.5	16015.8	17694.6	12297.2	6944.52	28280.9	28241.8	26405.4
M369T36	369.349	36.0795	Cholesterol	[M+H-H2O]+	HMDB0000067	C00187	Lipids and lipid-like molecules	Steroids and steroid derivatives	Cholestane steroids	260125	254174	274569	92465.9	95063.6	125108	64605	38971.6	73445.1	48486.9	99119.5	137631	28912.4	17296.2	28955.7
M426T226	426.319	226.237	Cholic acid	[M+NH4]+	HMDB0000619	C00695	Lipids and lipid-like molecules	Steroids and steroid derivatives	Bile acids, alcohols and derivatives	13393.6	12277.8	12532.5	1554.44	9540.32	14292.5	9142.25	15976.5	10407.2	18447.2	9746.55	10661.4	16561.8	15920	15952.7
M104T272_2	104.107	271.696	Choline	[M]+	HMDB0000097	C00114	Organic nitrogen compounds	Organonitrogen compounds	Quaternary ammonium salts	6.88755e+07	2.95943e+07	3.39738e+07	2.23278e+07	2.97556e+07	3.21263e+07	2.62036e+07	2.13049e+07	2.73728e+07	3.04791e+07	2.73023e+07	2.03684e+07	2.64877e+07	2.67656e+07	2.6485e+07
M509T530	509.192	530.463	Chrysomycin a	[M+H]+			Organic oxygen compounds	Organooxygen compounds	Carbohydrates and carbohydrate conjugates	815.206	1330.78	1286.46	461.934	1184.79	688.736	727.194	864.118	1728.24	1205.52	1195.49	1439.85	1345.59	1512.9	1346.46
M685T225	685.387	224.95	Cilostamide	[2M+H]+			Organoheterocyclic compounds	Quinolines and derivatives	Quinolones and derivatives	5062.63	3592.03	3125.4	1464.96	4347.26	3828.35	2516.96	2894.67	4051.43	555.202	2663.95	822.096	169.145	132.119	159.3
M295T39	295.192	38.518	Cinchonidine	[M+H]+		C11379				43732.7	56963.6	27913.4	196567	69354.7	35755.2	86122.9	91102.7	160693	39196.7	81772	70977.2	57711	44675.8	57290.2
M131T258	131.048	258.47	Cinnamic acid ethyl ester	[M+H-C2H6O]+		C06359	Phenylpropanoids and polyketides	Cinnamic acids and derivatives	Cinnamic acid esters	198214	194934	214386	12965.9	157738	150143	138097	353172	213499	344468	149924	451837	345462	340466	345472
M400T448	400.169	447.515	Colchicine	[M+H]+	HMDB0015466	C07592	Hydrocarbon derivatives	Tropones		8321.93	6305.79	5028.68	490.01	5150.01	6201.96	2759.14	9588.2	6675.47	8903.62	4165.27	9188.62	9517.02	9515.1	9660.19
M132T359	132.076	359.404	Creatine	[M+H]+	HMDB0000064	C00300	Organic acids and derivatives	Carboxylic acids and derivatives	Amino acids, peptides, and analogues	6.2866e+06	5.74438e+06	7.20266e+06	7.30086e+06	7.15437e+06	6.99403e+06	6.27778e+06	3.12353e+06	4.91623e+06	4.40591e+06	4.06566e+06	3.58547e+06	3.85335e+06	3.83747e+06	3.85335e+06
M114T49_2	114.09	49.289	Creatinine	[M+H]+	HMDB0000562	C00791	Organic acids and derivatives	Carboxylic acids and derivatives	Amino acids, peptides, and analogues	1.04778e+06	787050	807097	223774	1.00426e+06	1.06203e+06	970863	736950	1.3574e+06	637583	629333	654683	757572	764840	753129
M395T14	395.126	14.2925	Creatinol o-phosphate	[2M+H]+			Organic acids and derivatives	Organic phosphoric acids and derivatives	Phosphate esters	992.668	997.558	932.894	905.71	843.493	1232.04	934.152	1315.86	1499.83	713.976	1035.47	945.207	922.428	931.85	922.562
M257T151	257.137	151.488	Curcumenol	[M+Na]+	HMDB0033960	C16942	Lipids and lipid-like molecules	Prenol lipids	Sesquiterpenoids	32556.2	22861.3	5998.67	1738.54	24667.1	21944.5	33884.8	53989.9	35828.3	24410	13828.1	21961.8	25177	25371.6	21540.4
M263T237	263.096	236.778	Cyanazine	[M+Na]+		C14299	Organoheterocyclic compounds	Triazines	Aminotriazines	12568.4	570.942	18017.3	8284.27	60850.8	12125.5	11682.1	42504.8	20975.6	38352.6	9130.69	14530.2	33276.2	30428.1	33348
M485T529	485.306	528.93	Cyasterone	[M+H-2H2O]+		C08816	Lipids and lipid-like molecules	Prenol lipids	Triterpenoids	9745.81	11295.3	10840.2	2344.98	8011.54	11193.1	10120.6	23714.1	16164.9	23346.9	10000.7	35418.2	22137.3	21346.6	22148.2
M100T152	100.111	152.307	Cyclohexylamine	(M+H)+	HMDB0031404	C00571	Organic nitrogen compounds	Organonitrogen compounds	Cyclohexylamines	15061.7	19587.6	13501.3	26023	27218.5	19160.6	26983.6	12656.5	21705.1	12263.7	22259.9	10805.2	12201.5	14404.8	12180.6
M412T198	412.303	198.457	Cyclopamine	[M+H]+		C10798	Lipids and lipid-like molecules	Steroids and steroid derivatives	Steroidal alkaloids	2730.59	2486.64	1764.64	666.56	1106.74	2256.13	1454.42	2361.16	2651.88	1946.98	1104.03	613.948	2135.21	1884.43	2134.21
M372T39	372.345	39.401	Cyclovirobuxin d	[M+H-CH5N]+			Lipids and lipid-like molecules	Prenol lipids	Triterpenoids	42981.5	15693.2	36102.6	21672.4	71163	22061.1	71181.5	47912	81314	45898	42925.5	16170.8	46123	44486.4	46042.3
M467T396	467.135	396.429	Cyhalothrin	[M+NH4]+		C10983	Lipids and lipid-like molecules	Fatty Acyls	Fatty acid esters	6388.02	7894.84	3930.56	4727.19	8729.39	8034.69	7449.28	8957.3	17244.2	20068	10781.1	11085.7	9015.35	10660.3	8974.17
M487T278	487.177	278.252	Cytarabine	[2M+H]+	HMDB0015122	C02961				7889.46	11467.5	14485.4	12162.4	8959.13	20214.6	9048.9	32.4312	13186.5	4041.36	11066.4	10958	11887.2	13288.4	12017.1
M244T243	244.091	243.056	Cytidine	[M+H]+	HMDB0000089	C00475	Nucleosides, nucleotides, and analogues	Pyrimidine nucleosides		5838.23	1005.9	5496.05	10450	6122.06	34134.3	12554.2	159923	31071.5	207672	19582	153651	132874	135274	132873
M346T464_1	346.04	464.264	Cytidine 3'-monophosphate	[M+Na]+		C05822				33001.8	40764.9	9466.99	3017.95	14932.3	15315.7	9160.16	30614.4	20592.5	13953.3	8218.48	23662.5	23232	21395.6	23246.9
M404T502	404.024	502.257	Cytidine 5'-diphosphate	[M+H]+	HMDB0001546	C00112	Nucleosides, nucleotides, and analogues	Pyrimidine nucleotides	Pyrimidine ribonucleotides	7813.33	5362.18	6335.59	881.08	5106.12	6392.1	3388.42	8018.5	4168.46	10996.5	4323.38	14872.1	8758.07	9062.03	9076.64
M489T450	489.111	450.276	Cytidine 5'-diphosphocholine	[M+H]+	HMDB0001413	C00307	Nucleosides, nucleotides, and analogues	Pyrimidine nucleotides	Pyrimidine ribonucleotides	8355.71	9031.57	8239.4	1413.6	7023.88	8874.56	4992.59	14126.4	7924.3	11546.2	6826.47	21249.6	15058.2	14497.5	14501.1
M489T359	489.114	358.912	Cytidine 5'-diphosphocholine (CDP-choline)	(M+H)+	HMDB0001413	C00307	Nucleosides, nucleotides, and analogues	Pyrimidine nucleotides	Pyrimidine ribonucleotides	112.54	47.8885	342.084	301.75	69.287	49.1722	209.739	1690.36	632.039	2063.01	296.802	524.835	705.094	705.689	592.594
M324T457	324.057	457.017	Cytidine 5'-monophosphate	[M+H]+	HMDB0000095	C00055	Nucleosides, nucleotides, and analogues	Pyrimidine nucleotides	Pyrimidine ribonucleotides	41170.9	70466.9	56915.4	20771.9	34854.5	52351.7	41064.5	98558.7	65865.7	165582	41842.6	219269	112538	111958	120252
M442T423	442.238	423.222	Cytochalasin a	[M+H-2H2O]+		C19953	Alkaloids and derivatives	Cytochalasans	Cytochalasins	2063.11	1685.48	2198.98	624.374	1903.9	2109.38	2584.5	3057.42	1332.39	3170.44	1236.24	4984.57	3824.2	3294.32	3258.28
M502T418	502.259	417.954	Cytochalasin b	[M+Na]+		C19954	Alkaloids and derivatives	Cytochalasans	Cytochalasins	6976.19	6736.36	5510.29	646.24	6412.68	4307.28	6907.15	6938.1	8108.7	9598.68	4477.4	10708.4	6544.96	4640.31	6599.56
M112T242	112.05	241.739	Cytosine	[M+H]+	HMDB0000630	C00380	Organoheterocyclic compounds	Diazines	Pyrimidines and pyrimidine derivatives	15782.5	4878.63	17941.1	7710.27	13752.6	68247.8	1152.22	237403	55956.6	295444	18497.7	274236	227313	227279	223391
M134T406	134.044	405.954	D-aspartic acid	[M+H]+	HMDB0006483	C00402	Organic acids and derivatives	Carboxylic acids and derivatives	Amino acids, peptides, and analogues	265837	258419	295828	63133.9	222348	282659	281014	439813	349277	440371	286148	597196	411459	407306	407325
M111T71	111.054	70.8925	D-erythro-imidazolylglycerol phosphate	[M+H-CH5O5P]+		C04666	Organic acids and derivatives	Organic phosphoric acids and derivatives	Phosphate esters	288925	109707	343176	90789.7	547466	646920	159866	557536	695098	579900	185661	1.15256e+06	442556	443468	398601
M201T402	201.015	401.588	D-erythrose 4-phosphate	[M+H]+	HMDB0001321	C00279	Organic oxygen compounds	Organooxygen compounds	Carbohydrates and carbohydrate conjugates	9950.96	9082.67	2715.85	648.921	3076.68	7621.97	13069.8	22747.9	24464.1	3515.39	2321.93	10889.6	12858.5	12857.6	13122.2
M260T404	260.073	404.118	D-glucosamine 6-phosphate	[M+H]+	HMDB0001254	C00352	Organic oxygen compounds	Organooxygen compounds	Carbohydrates and carbohydrate conjugates	6047.58	11285.9	14662.2	2427.4	74147.6	76079.2	101142	185875	111589	43819.3	47859.8	120350	117428	124718	117233
M521T481	521.063	480.772	D-glucose 6-phosphate	[2M+H]+		C00092	Organic oxygen compounds	Organooxygen compounds	Carbohydrates and carbohydrate conjugates	2769.09	5088.8	10775	405.573	5700.04	8797.76	1232.74	4320.81	2362.71	8671.54	449.422	42821.6	15298.1	14563.3	14552.5
M130T405_2	130.05	405.347	D-glutamine	[M+H-NH3]+	HMDB0003423	C00064	Organic acids and derivatives	Carboxylic acids and derivatives	Amino acids, peptides, and analogues	2.90773e+06	2.58251e+06	2.7512e+06	537276	2.44057e+06	2.96926e+06	2.38009e+06	3.6821e+06	2.81626e+06	3.63763e+06	2.59084e+06	4.48842e+06	3.68329e+06	3.68328e+06	3.691e+06
M281T213	281.148	212.541	D-lysergic acid n,n-diethylamide	[M+H-C2H5N]+		C07542	Alkaloids and derivatives	Ergoline and derivatives	Lysergic acids and derivatives	24975.7	7856.37	15018.5	12626.8	6890.41	22103.1	20999.7	11455.1	17819.3	7010	10678.5	9767.69	9670.88	9166.84	9669.23
M133T521	133.096	521.396	D-ornithine	[M+H]+	HMDB0003374	C00515	Organic acids and derivatives	Carboxylic acids and derivatives	Amino acids, peptides, and analogues	163830	84699.7	113071	90653.9	132598	158301	94482.9	148498	103916	69421.7	122895	140888	110803	122520	138098
M130T576	130.085	576.148	D-Pipecolinic acid	(M+H)+						323554	309943	254672	42672.4	284517	71501.7	294188	56399.3	81853	389281	58133.9	76903.2	142915	159119	184775
M259T467	259.091	467.401	D-pyroglutamic acid	[2M+H]+		C02237	Organic acids and derivatives	Carboxylic acids and derivatives	Amino acids, peptides, and analogues	10203.8	5776.38	7949.2	688.206	6152.62	9476.16	8866.35	29150.9	16925.8	28301.3	9900.79	65550.6	30120	30120.8	29866.7
M497T457	497.125	456.661	Dapsone	[2M+H]+	HMDB0014395	C07666	Benzenoids	Benzene and substituted derivatives	Benzenesulfonyl compounds	9989.69	9125.95	9124.65	684.733	6733.21	12089.3	7787.68	16174.3	13993.3	16875.3	9477.19	16788.3	16526	16401.1	16402.3
M504T267	504.167	267.184	Dasatinib n-oxide	[M+H]+			Benzenoids	Benzene and substituted derivatives	Anilides	81523.6	86745.4	83571.2	1180.45	89370.8	91479.7	69452.5	95848.1	113890	112352	88408.2	33562.7	114487	114717	120182
M147T52_1	147.054	51.56	Debromohymenialdisine	[M+H-C3H5N3O]+						41732.8	32025.8	50291	29670.3	256882	92786.6	41723.5	40188	62382.4	74956.3	5276.72	48841	97968.9	97204	97217.1
M316T191	316.247	190.828	Decanoyl-l-carnitine	[M+H]+	HMDB0062631		Lipids and lipid-like molecules	Fatty Acyls	Fatty acid esters	43348.7	30418.4	33742.9	11125.6	27783.3	38168.4	42111.5	76084.4	50134.5	78046.3	46162.8	28735.7	67941.6	67935.7	69879
M400T58	400.376	58.2245	Demissidine	[M+H]+						12594.2	14776.2	14491.9	5391.99	3202.2	15513.2	12500.3	8164.23	3004.42	8542.44	8867.9	1659.42	8148.77	8589.95	8592.24
M252T146	252.108	145.797	Deoxyadenosine	[M+H]+	HMDB0000101	C00559	Nucleosides, nucleotides, and analogues	Purine nucleosides	Purine 2'-deoxyribonucleosides	73527.2	141268	199120	99179.3	541277	291595	196283	244789	279429	528121	293851	490926	704710	836320	695352
M152T265	152.056	265.154	Deoxyguanosine	[M+H-C5H8O3]+	HMDB0000085	C00330	Nucleosides, nucleotides, and analogues	Purine nucleosides	Purine 2'-deoxyribonucleosides	183582	339032	345660	25646.3	207184	419714	146937	600294	267991	1.06598e+06	222858	1.15352e+06	692849	686617	692832
M688T363	688.153	362.939	Dephosphocoenzyme A (Dephospho-CoA)	(M+H)+	HMDB0001373	C00882	Nucleosides, nucleotides, and analogues	Purine nucleotides	Purine ribonucleotides	4300.72	3856.57	2340.75	953.254	889.739	2198.96	945.961	1864.52	623.613	957.365	1310.51	731.924	2302.9	2216	2210.53
M553T370	553.455	370.191	Dereplicator identification - (2r)-beta,beta-caroten-2-ol	[M+H]+			Lipids and lipid-like molecules	Prenol lipids	Tetraterpenoids	4727.03	3926.47	2128.03	5013.89	3436.79	3254.04	3935.67	2421.08	4012.41	2748.69	2933.08	2605.74	2430.9	2950.64	2509.36
M538T265	538.151	265.018	Desmethylbosentan	[M+H]+			Organoheterocyclic compounds	Diazines	Pyrimidines and pyrimidine derivatives	59728.1	61737.7	64607.5	7597.31	51297	71751.4	43980.3	80580.9	68997.3	74693.6	46178.3	31574.1	80283.2	75527	80273.9
M757T466	757.085	465.613	Diadenosine triphosphate	[M+H]+		C06197				11909.7	9981.56	10805.8	2256.46	9017.72	10861	11717	24315.2	16183.5	23112.6	12224.3	35833.8	20894.2	20969.5	20885.6
M344T56	344.227	56.025	Dibucaine	[M+H]+	HMDB0014668	C07879	Organoheterocyclic compounds	Quinolines and derivatives	Quinolones and derivatives	49365.8	77041.1	72249	1835.97	18314.4	72388.5	13942.6	211389	37311.5	214241	14124.2	259133	174125	165928	165986
M279T34	279.159	34.172	Dibutyl phthalate	[M+H]+	HMDB0033244	C14214	Benzenoids	Benzene and substituted derivatives	Benzoic acids and derivatives	8.93986e+06	7.42133e+06	8.19057e+06	2.90908e+06	4.27281e+06	9.29995e+06	6.94258e+06	8.23876e+06	4.537e+06	7.56272e+06	3.74408e+06	4.93311e+06	8.6728e+06	8.55045e+06	8.67271e+06
M486T277	486.14	276.551	Dibutyryl-cgmp	[M+H]+			Nucleosides, nucleotides, and analogues	Purine nucleotides	Cyclic purine nucleotides	6387.62	6324.2	4583.57	14.535	6563.2	8703.25	12065	681.93	12506.7	11171.2	10853.8	9705.46	16102.3	16078.4	14339.9
M555T413	555.204	413.418	Didansyl-1,4-diaminobutane	[M+H]+			Benzenoids	Naphthalenes	Naphthalene sulfonic acids and derivatives	1127.99	1689.71	1541.54	606.395	1332.14	1488.2	1400.43	2966.83	1845.93	4645.25	1737.43	3162.38	2241.7	2241.32	2053.24
M417T287	417.065	286.808	Diflufenican	[M+Na]+		C18549	Benzenoids	Benzene and substituted derivatives	Anilides	21784.9	21924.5	23525.1	1078.96	16334.3	20932.8	11613.8	5935.01	10601	3170.47	8971.37	9666.35	2953.11	2497.37	2626.86
M191T48	191.08	48.405	Dihydralazine	[M+H]+			Organoheterocyclic compounds	Diazanaphthalenes	Benzodiazines	30311	29323.5	32049.6	80533.1	103762	132148	87637.6	66895	66231.9	80031.7	41386.9	17303.2	71370	69209.5	69162.6
M179T368	179.091	367.848	Dihydroisoferulic acid	[M+H-H2O]+	HMDB0131138					33801.6	21719.8	21773.7	15110.8	19434.9	21396.5	21927.6	15893.7	22177.7	27625.4	21243.4	25314.7	18756.9	17107	18867.4
M469T589	469.325	588.844	Diisodecyl phthalate	[M+Na]+		C14578	Benzenoids	Benzene and substituted derivatives	Benzoic acids and derivatives	1155.77	817.393	2265.48	1449.12	1280.87	1180.28	1814.4	1231.17	1408.42	1198.57	1360.71	1914.53	1293.16	1352.6	1294.47
M410T17	410.135	17.356	Dimethomorph	[M+Na]+		C18583	Benzenoids	Benzene and substituted derivatives	Diphenylmethanes	1592.8	1110.63	1308.44	1104.58	1184.92	1307.09	1512.08	1405.73	1164.31	989.861	1216.08	1314.94	1379.55	1379.9	1390.97
M79T59_2	79.0207	58.98	Dimethyl sulfoxide	[M+H]+	HMDB0002151	C11143				864693	500472	565378	99572.2	648759	778338	638251	1.50001e+06	718422	1.08516e+06	648026	1.13177e+06	1.29193e+06	1.2853e+06	1.29197e+06
M391T34_2	391.285	34.1695	Dioctyl phthalate	[M+H]+		C14227	Benzenoids	Benzene and substituted derivatives	Benzoic acids and derivatives	3.50536e+07	3.14022e+07	3.70176e+07	1.00239e+07	1.16779e+07	3.65292e+07	2.92938e+07	3.13216e+07	1.599e+07	2.69238e+07	1.27242e+07	1.60293e+07	3.19597e+07	3.19428e+07	3.23774e+07
M352T242	352.232	242.338	Dipivefrine	[M+H]+	HMDB0014592	C06963				17598	4480.34	2501.17	6247.17	15300.7	14221.5	12895.3	21592.2	19227.8	23827.7	789.263	6912.83	24851.3	26344.2	24851.8
M146T40	146.116	40.036	Dl-.beta.-homoleucine	[M+H]+			Organic acids and derivatives	Carboxylic acids and derivatives	Amino acids, peptides, and analogues	81482.3	79671.3	80441.6	57711.8	299132	56789.6	185698	170392	251130	260580	372325	346801	223397	248074	247763
M130T72	130.085	71.515	DL-arginine	[M+H-CH3ON]+	HMDB0000517/HMDB0003416	C00792	Organic acids and derivatives	Carboxylic acids and derivatives	Amino acids, peptides, and analogues	856983	1.12715e+06	1.20177e+06	135387	838001	1.66521e+06	894553	2.06885e+06	1.53607e+06	3.11591e+06	1.29039e+06	2.96667e+06	2.21792e+06	2.21791e+06	2.20882e+06
M223T459	223.073	458.566	Dl-cystathionine	[M+H]+	HMDB0000455	C00542	Organic acids and derivatives	Carboxylic acids and derivatives	Amino acids, peptides, and analogues	28229.5	22637.2	12866.7	672.995	24298.2	46491.2	20495.3	63268.5	28958.1	51145.9	21381.9	143349	73678.2	109942	110237
M148T405_2	148.06	405.347	DL-Glutamic acid	[M+H]+	HMDB0060475	C00025	Organic acids and derivatives	Carboxylic acids and derivatives	Amino acids, peptides, and analogues	4.28315e+06	3.85565e+06	3.96985e+06	750902	3.57226e+06	4.52944e+06	3.83631e+06	6.26591e+06	4.84481e+06	5.93951e+06	4.38381e+06	7.3255e+06	5.96429e+06	5.90277e+06	5.96391e+06
M188T200	188.069	199.629	DL-Indole-3-lactic acid	(M+H-H2O)+						7451.55	4049.97	3043.45	4829.21	2598.75	5837.67	5142.28	5782.75	10320.3	5559.24	3551.08	6631.07	6325.96	6048.3	6326.79
M132T296	132.101	295.797	DL-isoleucine	[M+H]+	HMDB0033923	C00407	Organic acids and derivatives	Carboxylic acids and derivatives	Amino acids, peptides, and analogues	593454	564043	115769	275232	143120	165043	121551	374099	222102	390053	186205	447920	344540	332170	344578
M147T531	147.112	530.953	DL-Lysine	[M+H]+	HMDB0142894	C16440	Organic acids and derivatives	Carboxylic acids and derivatives	Amino acids, peptides, and analogues	419045	763192	486211	410765	546844	318036	486640	371703	427557	483302	519285	591981	669196	671215	749946
M146T260	146.059	259.565	DL-O-tyrosine	(M+H-2H2O)+						220061	196251	231239	10015.9	119488	235969	136174	369367	201240	351556	138997	504555	406449	402385	402405
M166T258_2	166.086	257.762	DL-phenylalanine	[M+H]+		C02057	Organic acids and derivatives	Carboxylic acids and derivatives	Amino acids, peptides, and analogues	6.77991e+06	6.44359e+06	7.1133e+06	462474	5.24816e+06	7.99547e+06	4.93518e+06	1.21834e+07	6.30621e+06	1.21161e+07	5.10995e+06	1.53731e+07	1.22716e+07	1.22165e+07	1.22715e+07
M116T319_2	116.07	318.918	DL-proline	[M+H]+	HMDB0000162	C00148	Organic acids and derivatives	Carboxylic acids and derivatives	Amino acids, peptides, and analogues	973846	2.38206e+06	1.08219e+06	3.04305e+06	2.51221e+06	2.44242e+06	2.25731e+06	1.83699e+06	994211	1.02941e+06	1.3049e+06	1.67754e+06	866518	868934	866517
M134T62	134.08	62.343	Dl-threonine methyl ester	[M+H]+			Organic acids and derivatives	Carboxylic acids and derivatives	Amino acids, peptides, and analogues	976678	857816	817765	140318	780373	1.03135e+06	874409	1.68347e+06	1.07949e+06	1.76085e+06	684743	1.56343e+06	1.58779e+06	1.3743e+06	1.59091e+06
M229T304	229.153	303.915	Dl-tmap	[M]+			Organic acids and derivatives	Carboxylic acids and derivatives	Amino acids, peptides, and analogues	52683	38770.4	45291.1	38698.6	28637.7	43883.5	35651.3	40392.8	27331	51507.7	54087.7	52477.3	56327.9	56336.4	57647
M182T302_2	182.081	301.815	DL-tyrosine	[M+H]+	HMDB0000158	C00082	Organic acids and derivatives	Carboxylic acids and derivatives	Amino acids, peptides, and analogues	1.11132e+06	1.18292e+06	1.42247e+06	276460	1.09671e+06	1.7624e+06	938772	1.97065e+06	1.34486e+06	2.16921e+06	954631	2.7465e+06	2.30213e+06	2.30219e+06	2.29349e+06
M216T43_2	216.194	42.5615	Dodecanoic acid, 12-[[(tricyclo[3.3.1.13,7]dec-1-ylamino)carbonyl]amino]-	[M+H-C11H15NO]+			Lipids and lipid-like molecules	Fatty Acyls	Fatty acids and conjugates	30766.8	17656.4	13359.5	16911.3	59832.2	19608.5	46861	32261.8	26231.6	23775.5	39007.3	22667.2	32183.8	27788	27464.2
M464T437	464.127	436.815	Dofetilide	[M+Na]+	HMDB0014349	C07751	Benzenoids	Benzene and substituted derivatives	Sulfanilides	6783.28	3476.38	6352.52	2686.15	4358.53	4153.28	5096.8	8638.3	6770.31	9242.47	6990.22	9079.57	11175.5	11255.5	11506.6
M136T302_2	136.075	301.815	Dopamine	(M+H-H2O)+	HMDB0000073	C03758	Benzenoids	Phenols	Benzenediols	698377	740240	856841	183734	680574	1.02891e+06	597803	1.15176e+06	796843	1.20471e+06	607123	1.48427e+06	1.32859e+06	1.32478e+06	1.31761e+06
M445T382	445.158	382.099	Doxycycline	[M+H]+	HMDB0014399	C06973				66787.9	174345	146708	196116	35727.2	138316	852213	2.12457e+06	1.04942e+06	872357	249846	2.00044e+06	403477	299413	289236
M592T120	592.387	120.49	Edpetiline	[M+H]+			Lipids and lipid-like molecules	Steroids and steroid derivatives	Steroidal glycosides	11870.6	6894.38	2612.44	1522.16	9957.96	8270.32	1226.69	4571.92	4225.65	12530.1	9186.06	16415.4	8911.83	8896.9	9352.58
M166T428	166.052	428.465	Eflornithine	[M+H-NH3]+		C07997	Organic acids and derivatives	Carboxylic acids and derivatives	Amino acids, peptides, and analogues	39275.3	35202	34053	17509.5	29959.7	15638.8	6130.52	28733	14903.3	15585.6	31582.4	22030.3	25046.5	29706	29717.4
M459T27	459.093	27.228	Epigallocatechin gallate	[M+H]+	HMDB0003153	C09731	Phenylpropanoids and polyketides	Flavonoids	Flavans	1109.15	239.1	436.023	302.897	729.799	330.251	306.061	2364.49	643.364	504.974	219.374	328.715	837.543	837.774	849.521
M114T252	114.09	252.154	epsilon-Caprolactam	(M+H)+						10812.2	14916.9	17975.4	25091	8319.2	14584.2	9509	11990	14291.2	13923.6	13201.3	13028.3	15237.1	15054.2	15054.3
M582T429	582.246	428.605	Ergotamine	[M+H]+	HMDB0014834	C07544	Alkaloids and derivatives	Ergoline and derivatives	Lysergic acids and derivatives	2365.56	3188.13	3997.01	776.4	3831.37	4871.19	4889.15	4636.55	5495.58	6492.43	6456.2	8539.37	5650.64	5288.1	5322.54
M230T330	230.095	330.105	Ergothioneine	[M+H]+	HMDB0003045	C05570	Organic acids and derivatives	Carboxylic acids and derivatives	Amino acids, peptides, and analogues	41903.8	42044.3	36683.5	12333.2	17389.6	34675.9	31451.7	992.031	40921.9	1499.74	33892.3	18543.8	3688.16	3694.91	3847.61
M597T493	597.161	493.307	Eriodictyol 7-o-neohesperidoside	[M+H]+		C09805	Phenylpropanoids and polyketides	Flavonoids	Flavonoid glycosides	6031.36	4671.92	7602.27	1391	6896.69	8364.6	11717.1	21586.4	17142.6	30889.3	8502.75	36930.1	19683.3	19116.3	19726.9
M338T36_3	338.341	36.107	Erucamide	[M+H]+			Lipids and lipid-like molecules	Fatty Acyls	Fatty amides	5.76291e+06	3.89849e+06	7.68885e+06	2.65468e+06	1.91343e+06	3.55923e+06	2.87431e+06	1.17832e+06	1.26363e+06	1.73914e+06	2.66276e+06	2.02207e+06	1.4801e+06	1.56324e+06	1.48118e+06
M735T53	735.499	52.869	Erythromycylamine	[M+H]+			Organic oxygen compounds	Organooxygen compounds	Carbohydrates and carbohydrate conjugates	12351.7	9862.4	14812.3	7517.3	3353.81	9967.96	5776.88	3022.29	6080.21	3259.3	4367.82	3337.27	1607.4	1606.9	1519.13
M186T46	186.111	45.9705	Ethanone, 2-(2-chlorophenyl)-1-[1-(5-hydroxypentyl)-1h-indol-3-yl]-	[M+H-C8H7ClO2]+			Organoheterocyclic compounds	Indoles and derivatives	Phenylacetylindoles	35706.7	13680.7	18865.1	10100.6	63889.9	28031.5	36615.2	43629.8	42129.2	34931.6	53913.3	17966.8	37111.8	38023.6	37071.4
M399T290	398.975	290.05	Ethiprole	[M+H+2i]+		C18552	Organoheterocyclic compounds	Azoles	Pyrazoles	31055.2	29376	27256.6	57986.7	29978.5	21240.5	26445.1	15846.4	6910	8691.09	16451.3	11595.2	8104.46	7016.4	6983.34
M115T108	115.035	107.859	Ethyl hydrogen malonate	[M+H-H2O]+	HMDB0000576		Organic acids and derivatives	Carboxylic acids and derivatives	Dicarboxylic acids and derivatives	576.399	5772.45	7674.31	17748.5	10377.3	2262.24	1699.46	7024.61	2928.81	8876.58	10594.1	8642.32	8553.99	9680.81	8618.21
M315T457	315.08	457.034	Ethylenediaminetetraacetic acid	[M+Na]+	HMDB0015109	C00284	Organic acids and derivatives	Carboxylic acids and derivatives	Tetracarboxylic acids and derivatives	4502.8	2637.63	3516.35	2282.34	2557.92	3708.66	8324.91	10160.9	3783.64	11288.2	635292	12423.4	119231	122553	121501
M575T472	575.276	472.153	Euphorbiasteroid	[M+Na]+			Lipids and lipid-like molecules	Prenol lipids	Diterpenoids	5883.12	4229.42	7332.43	1334.94	6068.12	9560.13	4840.83	13132.5	9976.65	6475.33	7644.96	18058.2	6854.97	5601.38	6185.84
M471T265	471.214	264.737	Evodin	[M+H]+		C03514	Lipids and lipid-like molecules	Prenol lipids	Triterpenoids	5428.08	6343.54	5352.52	54.9828	9357.08	6803.21	6130.4	5085.12	7372.84	5926.95	5804.54	4097.37	1803.3	2064.81	2451.95
M275T418	275.052	417.55	Famotidine acid methyl ester	[M+H]+			Organoheterocyclic compounds	Azoles	Thiazoles	2725.71	4160.05	2694.17	1911.83	3062.87	3922.5	3429.47	4171.09	3280.86	3492.84	3095.35	2288.89	2151.01	2155.62	1990.78
M671T468	671.193	468.027	Fenamiphos sulfone	[2M+H]+			Benzenoids	Benzene and substituted derivatives	Benzenesulfonyl compounds	1927.45	1518.01	1482.19	261.256	1501.65	1231.34	1267.95	2309.18	2348.13	2700.77	1481.88	1616.92	1988.64	1996.25	2243.5
M274T63	274.274	63.49	Fenpropidin	[M+H]+		C18726	Benzenoids	Benzene and substituted derivatives	Phenylpropanes	6.29738e+06	4.7269e+06	6.26121e+06	1.57147e+06	4.16735e+06	7.39004e+06	5.62623e+06	7.60187e+06	3.73899e+06	7.21228e+06	6.90547e+06	833808	6.98575e+06	6.74995e+06	6.75032e+06
M388T412	388.115	411.901	Fentrazamide	[M+K]+		C18501	Organoheterocyclic compounds	Azoles	Tetrazoles	2034.57	1574.39	2051.24	599.579	1445.97	2147.18	2099.23	3788.85	2378.46	4450.9	1940.83	6189.95	3483.82	3398.25	3482.94
M786T503_2	786.166	503.372	Flavin adenine dinucleotide (FAD)	(M+H)+	HMDB0001248	C00016	Organic oxygen compounds	Organooxygen compounds	Carbohydrates and carbohydrate conjugates	1997.91	2614.89	3291.61	628.786	1717.15	3347.56	1780.81	7610.88	3598.71	8187.49	2650.34	8069.83	4233.93	4715.5	4708.81
M415T419	415.142	419.464	Flecainide	[M+H]+	HMDB0015326	C07001	Benzenoids	Benzene and substituted derivatives	Benzoic acids and derivatives	7466.44	7106.58	5437.91	1621.42	4978.64	8002.66	6027.08	10423	10502.1	11685.8	8448.27	13277.7	10437	10565.2	10436.3
M397T380_2	397.054	380.441	Flucarbazone	[M+H]+			Benzenoids	Benzene and substituted derivatives	Benzenesulfonamides	9333.37	9326.85	9876.68	1893.38	7754	7544.09	2138.46	4115.77	2760.64	645.488	1528.33	5625.77	5811.2	5754.18	4905.01
M465T485	465.044	484.589	Fluoroglycofen-ethyl	[M+NH4]+			Benzenoids	Benzene and substituted derivatives	Diphenylethers	3708.98	14453.1	19526.3	12289	21594	30303.8	29105.7	36205.3	32982.1	50603.6	24445.3	50465	24503.4	23298.5	24522.6
M399T30	399.176	29.69	Fluorometholone	[M+Na]+	HMDB0014469		Lipids and lipid-like molecules	Steroids and steroid derivatives	Pregnane steroids	14216.7	8491.09	9654.24	2753.8	6269.59	16012.5	7698.01	14433.3	17801.8	16805.3	8482.26	8806.81	16688.2	16685.1	15551.9
M474T417	474.171	417.45	Folinic acid	[M+H]+	HMDB0001562/HMDB0062757	C03479	Organic acids and derivatives	Carboxylic acids and derivatives	Amino acids, peptides, and analogues	4721.7	4280.21	4165.27	789.182	3184.98	5299.74	5171.45	7912.06	5862.47	8948.34	4822.21	12987.5	8203.74	8607.07	8198.56
M433T437	433.199	436.941	Forskolin	[M+Na]+		C09076	Lipids and lipid-like molecules	Prenol lipids	Triterpenoids	12814.5	8645.61	14900.8	3972.44	11988.1	17948.6	10256.4	33258.8	20045.6	30946	27136.3	53770.4	32331.5	32332.3	32183.5
M290T37	290.116	36.7515	Furametpyr	[M+H-C2H4O]+		C18503				49406.5	43197.2	47241.1	2717.82	54962.8	49675.8	50499.5	70775.3	46917.7	65510.4	42320.3	120201	71364.4	71378.4	69522.8
M172T369	172.132	369.211	Gabapentin	[M+H]+	HMDB0005015	C07018	Organic acids and derivatives	Carboxylic acids and derivatives	Amino acids, peptides, and analogues	59027.4	58970.5	62241	25858.6	57637.9	70451.6	53691.3	94992.6	68657.2	99559.6	56075.5	122013	95040.3	91307.4	95044.2
M271T293	271.073	292.91	Galangin	[M+H]+	HMDB0029521	C10044	Phenylpropanoids and polyketides	Flavonoids	Flavones	21248.5	27702.2	20046.8	2403.98	509.796	1736.65	7267.78	5502.81	984.172	3214.57	10395.2	2000.33	4062.44	4046.49	3053.98
M276T439	276.118	439.395	Gamma-glu-glu	[M+H]+	HMDB0011738		Organic acids and derivatives	Carboxylic acids and derivatives	Amino acids, peptides, and analogues	484693	552142	877202	193975	795524	862134	375888	582478	341570	550515	328230	1.51517e+06	809214	801414	801213
M277T470	277.103	470.324	Gamma-l-glutamyl-l-glutamic acid	[M+H]+	HMDB0011737	C05282	Organic acids and derivatives	Carboxylic acids and derivatives	Amino acids, peptides, and analogues	82715.6	82303.3	128766	17608	89146.5	154247	120733	433444	193752	572013	144683	1.19792e+06	447500	454952	447592
M497T29	497.277	29.372	Geneticin	[M+H]+		C17703	Organic oxygen compounds	Organooxygen compounds	Carbohydrates and carbohydrate conjugates	56556.2	49796.1	49911.4	9631.08	35826.2	53096.5	50962.7	84993.7	62290.8	68544.1	24823.6	21780.3	71212	68619.7	71212.1
M407T388	407.114	388.3	Ginkgolide b	[M+H-H2O]+		C07602				4422.31	7765.62	9314.41	1286.19	9915.54	10409.8	4198.79	9536.98	6098.59	8087.84	2768.89	8925.25	9576.9	9390.64	10215.9
M767T229	767.494	228.511	Ginsenoside rg3 (r-form)	[M+H-H2O]+			Lipids and lipid-like molecules	Prenol lipids	Terpene glycosides	14431.4	6598.18	6741.56	415.214	2034.4	3307.25	3794.7	8128.05	2052.17	3854.46	2676.83	1683.9	5002.05	4253.19	5002.1
M152T331	152.069	331.334	Gln-arg	[M+2H]2+	HMDB0028791		Organic acids and derivatives	Carboxylic acids and derivatives	Amino acids, peptides, and analogues	15451.8	17588.8	16697	6582.64	17337.7	13354.4	12518.4	2514.18	17068.3	5515.23	23560.5	663.572	6393.98	6318.34	6318.34
M275T460	275.17	459.585	Gln-lys	[M+H]+	HMDB0028802		Organic acids and derivatives	Carboxylic acids and derivatives	Amino acids, peptides, and analogues	5019.24	5930.2	3888.57	4406.6	4633.98	2158.42	4591.99	9144.95	8164.84	10246.6	6083.67	7193.55	8241.65	7927.85	7896.41
M246T427_4	246.155	427.297	Gln-val	[M+H]+	HMDB0028810		Organic acids and derivatives	Carboxylic acids and derivatives	Amino acids, peptides, and analogues	5947.16	5938.48	8942.61	6323.6	3495.33	4323.78	5972.33	9807.84	7383.33	11717.1	9286.56	16765.8	9145.31	9352.08	9346.98
M304T395	304.16	395.183	Glu-Arg	[M+H]+	HMDB0028813		Organic acids and derivatives	Carboxylic acids and derivatives	Amino acids, peptides, and analogues	18811.1	11495.4	11852.6	2848.08	12469	7427.61	12511	37932.2	22042.9	35041.6	20619.4	32611.9	21030.4	23259.8	21102
M262T408	262.127	408.474	Glu-Asn	[M+H]+	HMDB0028814		Organic acids and derivatives	Carboxylic acids and derivatives	Amino acids, peptides, and analogues	77345.3	71197.2	82147.9	12888.6	61321.1	92485.2	70616.8	137289	92400.5	155891	68539.5	169472	129727	127939	129724
M419T428_2	419.187	427.841	Glu-Asp-Arg	[M+H]+			Organic acids and derivatives	Carboxylic acids and derivatives	Amino acids, peptides, and analogues	12531.6	10446.9	10463	816.537	8645.59	10594.4	11986.4	20499.7	15281.5	22164	16671.9	24403	17382.9	17176.5	17383.9
M334T473	334.124	472.501	Glu-Gly-Glu	[M+H]+			Organic acids and derivatives	Carboxylic acids and derivatives	Amino acids, peptides, and analogues	9290.7	10216.1	13777.8	2467.23	11157.1	18401.8	19036.6	59803.7	28507.3	58111	19859.1	131263	47804.3	47806.5	46640.3
M247T389	247.128	389.12	Glu-Val	[M+H]+	HMDB0028832		Organic acids and derivatives	Carboxylic acids and derivatives	Amino acids, peptides, and analogues	15391.7	21448.2	27686.1	11147	35545.2	26455.3	18486.3	52575.3	25598.2	66639.3	33078.3	66436.1	45022.4	44853.1	49561.9
M560T198	560.334	197.807	Glutamate conjugated cholic acid	[M+Na]+			Lipids and lipid-like molecules	Steroids and steroid derivatives	Bile acids, alcohols and derivatives	9088.17	5701.15	7422.74	2437.21	1077.76	4685.83	4770.62	7528.92	3545.23	4378.16	2346.71	1397.67	6536.52	7272.04	6524.81
M265T230	265.104	230.448	Glutamyl-s-methylcysteine	[M+H]+	HMDB0031985		Organic acids and derivatives	Carboxylic acids and derivatives	Amino acids, peptides, and analogues	53326	62482.3	13563.1	5584.68	14415.7	7614.92	20645.5	53206.9	119045	17111	14370.5	25145.6	11769.4	8725	11738.8
M83T363	83.06	363.45	Glutaraldehyde	[M+H-H2O]+	HMDB0029599	C12518	Organic oxygen compounds	Organooxygen compounds	Carbonyl compounds	554990	495622	465885	186412	463095	490273	479515	457419	504761	488713	425826	427527	480787	480794	483148
M190T114	190.038	113.531	Glutathione ethyl ester	[M+H-C5H10N2O3]+			Organic acids and derivatives	Carboxylic acids and derivatives	Amino acids, peptides, and analogues	7097.09	10675.2	10842.2	49322	14854.5	10592.8	377.546	14804.8	874.15	15290.5	15343.6	14149.6	18464.7	17452.6	17570.8
M613T497	613.159	497.159	Glutathione, oxidized	[M+H]+	HMDB0003337	C00127	Organic acids and derivatives	Carboxylic acids and derivatives	Amino acids, peptides, and analogues	3.40571e+06	2.44427e+06	3.56753e+06	735497	2.80024e+06	4.29749e+06	4.28069e+06	7.68267e+06	6.21127e+06	6.99222e+06	4.23414e+06	8.94733e+06	7.37478e+06	7.0739e+06	7.07651e+06
M232T460	232.139	459.764	Gly-Arg	(M+H)+						30354.6	30704.8	25035	13744.4	33991.6	33947.9	6895.15	28592	30729.4	35678.1	23827.1	29170.1	25892.6	27679.9	27623.8
M204T461	204.132	460.87	Gly-Lys	[M+H]+			Organic acids and derivatives	Carboxylic acids and derivatives	Amino acids, peptides, and analogues	15783.7	66606.2	15088.2	3480.54	8793.59	15762.8	4962.77	15473.9	13298.1	18706.1	14090.9	10688.9	15662.9	15333.2	15670.6
M301T483	301.185	483.215	Gly-Pro-Lys	[M+H]+			Organic acids and derivatives	Carboxylic acids and derivatives	Amino acids, peptides, and analogues	4901.17	6025.35	6677.13	1911.96	3211.79	5745.46	7499.84	3166.73	11508	17605.8	7056.84	7211.14	4439.7	4132.97	4460.97
M258T389_1	258.11	388.584	Glycerophosphocholine	[M+H]+	HMDB0000086	C00670	Lipids and lipid-like molecules	Glycerophospholipids	Glycerophosphocholines	5.80215e+07	4.78136e+07	4.22856e+07	7.16744e+06	4.6059e+07	4.16185e+07	5.54893e+07	8.75144e+07	5.9678e+07	3.02827e+07	3.68138e+07	6.86862e+07	6.74531e+07	6.74538e+07	6.53722e+07
M547T147	547.467	147.253	Glyceryl tripalmitoleate	[M+H-C16H30O2]+	HMDB0005432		Lipids and lipid-like molecules	Glycerolipids	Triradylcglycerols	5151.82	12453.6	5885.28	3269.11	815.902	4534.2	2081.01	799.773	2109.66	887.813	708.432	389.563	373.332	367.037	437.664
M787T472	787.235	471.743	Glycine, n,n'-[1,2-ethanediylbis(oxy-2,1-phenylene)]bis[n-[2-[(acetyloxy)methoxy]-2-oxoethyl]-, 1,1'-bis[(acetyloxy)methyl] ester	[M+Na]+			Organic acids and derivatives	Carboxylic acids and derivatives	Amino acids, peptides, and analogues	3924.73	4277.82	5233.12	1062.82	4658.87	5449.87	7416.83	5925.73	8755.67	8732.04	3458.9	4288.8	3643.51	3646.28	3736.05
M432T212	432.308	211.852	Glycodeoxycholic acid	[M+H-H2O]+	HMDB0000631	C05464	Lipids and lipid-like molecules	Steroids and steroid derivatives	Bile acids, alcohols and derivatives	597.13	731.532	637.81	142.504	376.661	801.73	359.291	118.475	355.953	154.472	539.478	107.898	217.347	336.179	282.325
M227T261	227.078	260.782	Glycyl-L-leucine	(M+K)+	HMDB0000759	C02155	Organic acids and derivatives	Carboxylic acids and derivatives	"Amino acids, peptides, and analogues"	116813	98299.5	69531.6	3859.56	41179.3	102209	31630.5	268776	65310.6	197387	36756.9	233526	276530	276688	283654
M501T460	501.197	460.218	Gossypol	[M+H-H2O]+	HMDB0040723	C07667	Lipids and lipid-like molecules	Prenol lipids	Sesquiterpenoids	4616.91	5095.39	5015.74	9124.98	5938.1	5097.96	3310.3	5321.93	5326.07	3517.21	6197.92	1036.1	4546.66	4271.65	4264.46
M152T230	152.056	230.364	Guanine	[M+H]+	HMDB0000132	C00242	Organoheterocyclic compounds	Imidazopyrimidines	Purines and purine derivatives	405864	409118	650319	144426	673242	309654	247806	721261	213942	1.56939e+06	450551	2.2704e+06	1.00308e+06	978478	1.00323e+06
M444T466	444.029	465.506	Guanosine diphosphate	[M+H]+		C00035				14334.9	12707.9	12745.2	2646.2	10724.2	14028.4	10125.6	20971.1	14574.7	24086	11222.4	35727.1	22370.6	22156.4	22370.5
M477T281	477.174	281.255	Harpagoside	[M+H-H2O]+		C09783	Lipids and lipid-like molecules	Prenol lipids	Terpene glycosides	24887.3	24102.1	25978.1	151.152	26795.6	30720.2	28559	146.19	40619	601.295	27546.2	111.907	20284.7	21937.7	20303.2
M514T430_2	514.25	430.211	Harringtonine	[M+H-H2O]+		C10597				11423.3	10355.4	13862.4	1774.84	7270.86	14406.1	16836.8	35550.5	15098.2	14935.2	10752.4	26333.2	26175.3	24943.1	24937.2
M437T97	437.234	96.7755	Hc toxin	[M+H]+		C15676	Organic acids and derivatives	Carboxylic acids and derivatives	Amino acids, peptides, and analogues	13955.5	19528.4	12638.4	4224.08	16200.9	9325.17	10907.7	27186.4	4789.38	16695.2	23684.1	20227.1	12272.2	12626	12135
M255T230	255.139	229.8	Helenine	[M+Na]+		C09289	Lipids and lipid-like molecules	Prenol lipids	Terpene lactones	16945.7	18504.7	6645.08	1910.61	6799.19	5425.27	9976.55	24713.2	4609.01	5941.23	6644.93	10558	2012.41	1917.79	2020.79
M288T62	288.289	62.055	Heptadecasphinganine	[M+H]+			Organic nitrogen compounds	Organonitrogen compounds	Amines	1.74823e+06	1.79947e+06	2.16095e+06	730703	603127	1.78128e+06	1.32238e+06	1.60002e+06	1.27626e+06	1.86911e+06	1.25149e+06	436747	2.00786e+06	2.0149e+06	2.01492e+06
M613T219	613.233	219.069	Herbimycin a	[M+K]+		C11225				1481.52	762.232	1517.47	3225.37	2907.94	3004.75	3181.2	1455.75	1540.96	903.475	2910.79	466.679	1462.7	1462.6	1484.79
M260T226	260.185	225.61	Hexanoyl-l-carnitine	[M+H]+	HMDB0000756		Lipids and lipid-like molecules	Fatty Acyls	Fatty acid esters	250508	163124	205353	35840.8	144286	210111	292125	145244	305485	178243	480206	59736.9	112778	103094	112897
M293T400	293.083	400.087	His-Asp	(M+Na)+						18672.5	23762.8	25280.8	16913.4	24445.4	28136.9	19534.5	20091.4	24128.8	41973	27247.7	31242.9	27281.8	27286.3	26342.4
M284T382	284.133	381.502	His-Gln	[M+H]+			Organic acids and derivatives	Carboxylic acids and derivatives	Amino acids, peptides, and analogues	4405.68	4062.19	4276.97	3415.29	3589.65	3007.92	2303.55	3480.27	4944.38	21262.8	12422.7	28429.7	2219.91	2393.92	2223.25
M285T434	285.118	433.772	His-Glu	[M+H]+			Organic acids and derivatives	Carboxylic acids and derivatives	Amino acids, peptides, and analogues	28394.4	23648.9	17310.3	7587.3	12116	23032	38616.4	54656.5	41024.2	49825.9	10772.6	61355.8	45466.4	46855	46855.9
M213T370_2	213.097	369.813	His-Gly	[M+H]+			Organic acids and derivatives	Carboxylic acids and derivatives	Amino acids, peptides, and analogues	31818.3	24629.2	23650	13817.6	22139.3	22204.8	16215.3	21505.3	20546.2	18540.2	11581	20746	27516.4	27504.7	28187.7
M225T335	225.101	335.148	His-His-Arg	[M+2H]2+			Organic acids and derivatives	Carboxylic acids and derivatives	Amino acids, peptides, and analogues	2895.97	2008.62	1654.87	2173.04	2866.35	942.189	1750.3	431.976	1706.38	761.758	1171.09	1154.7	827.474	826.818	626.015
M269T304	269.16	303.542	His-Leu	[M+H]+		C05010	Organic acids and derivatives	Carboxylic acids and derivatives	Amino acids, peptides, and analogues	4236.06	3234.92	4859.16	3369.64	2901.24	4343.58	1994.14	2836.1	1832.15	2800.83	1090.56	2709.45	4028.78	3815.3	3813.67
M440T205	440.281	204.82	His-Lys-Arg	[M+H]+			Organic acids and derivatives	Carboxylic acids and derivatives	Amino acids, peptides, and analogues	9990.45	4083.64	4614.96	2306.38	3228.47	5295.48	7086.9	8424.79	2579.32	6151.88	2228.97	3767.43	6901.53	7076.97	6905.02
M230T383	230.113	383.399	His-Phe-Arg	[M+2H]2+			Organic acids and derivatives	Carboxylic acids and derivatives	Amino acids, peptides, and analogues	8204.53	7571.13	10371.4	2881.46	6671.93	10003.5	12494.1	14196.2	7551.24	17604.9	9029.5	16976.9	12832.7	12508.6	12822.9
M156T383_2	156.076	383.448	Histidine	[M+H]+	HMDB0000177	C00135	Organic acids and derivatives	Carboxylic acids and derivatives	Amino acids, peptides, and analogues	898263	888525	1.14376e+06	196727	916437	1.34794e+06	653919	2.11197e+06	1.41613e+06	2.58379e+06	897375	3.19721e+06	2.30215e+06	2.28147e+06	2.28318e+06
M546T198	546.284	198.078	Homoharringtonine	[M+H]+	HMDB0000112	C00334				4000.67	3012.09	2876.5	647.327	1297.07	2271.8	2310.37	1850.16	2574.87	2090.14	1182.25	607.401	7201.72	5220.42	7243.52
M513T415	513.311	415.244	Huperzine b	[2M+H]+		C09866				1611.97	1693.2	1659.07	735.169	1784.24	4654.34	4011.57	7021.99	3594.82	4196.56	2132.6	9806.61	5160.32	4757.4	4751.59
M495T424	495.179	423.644	Hydramethylnon	[M+H]+		C10994	Benzenoids	Benzene and substituted derivatives	Trifluoromethylbenzenes	12429.3	11824.4	12357.8	2412.68	11308.4	12289.6	9799.67	16679.9	15190.9	17899.1	13561.2	18607.7	16132.2	15313	16113.4
M405T403	405.207	402.745	hydrocortisone 21-acetate	[M+H]+		C02821	Lipids and lipid-like molecules	Steroids and steroid derivatives	Pregnane steroids	27802.5	22362.6	22958.9	3906.17	17009.7	18401.1	30520.2	59700.6	40724.9	47492.6	30978.2	59741.8	40574.5	40575.3	41294.9
M486T380_2	486.299	379.774	Hydroxyebastine	[M+H]+			Benzenoids	Benzene and substituted derivatives	Diphenylmethanes	3042.94	2311.12	4005.37	624.482	2498.77	1734.5	3784.91	7434.79	4027.47	5785.18	2698.45	11433.8	5799.82	5802.63	5929.05
M511T433	511.208	433.048	Hypothallin	[M+K]+			Organic acids and derivatives	Carboxylic acids and derivatives	Amino acids, peptides, and analogues	3020.23	2312.82	2316.84	365.62	1451.2	3956.2	2090.57	5793.32	2864.43	3243.93	1473.3	5738.68	5258.91	5258.4	5304.36
M137T144	137.045	144.236	Hypoxanthine	[M+H]+	HMDB0000157	C00262	Organoheterocyclic compounds	Imidazopyrimidines	Purines and purine derivatives	15805.3	16960.8	15907.3	6092.72	47743.8	40069.2	24810.5	45911.5	28471.2	8460.77	21365.3	87174.2	107740	105991	106018
M699T278	699.245	277.775	Icariin	[M+Na]+		C17555	Phenylpropanoids and polyketides	Flavonoids	Flavonoid glycosides	9447.35	9569.76	11719.7	223.071	9994.24	8758.02	9350.6	3900.12	8913.48	3180.47	8503.48	2605.15	5600.41	5478.99	5667.48
M244T449	244.164	448.864	Ile-Ala	(M+CH3CN+H)+						35373.9	17588.2	22296.6	6081.35	25536.1	35413.6	22037.1	22303.1	49710.1	50886.6	32740.2	50943.2	40210.6	38106.2	40199.3
M261T423	261.145	422.658	Ile-Glu	(M+H)+						11522.3	9155.31	9767.2	4019.62	11285.2	8346.04	6977.05	16418.8	10432.2	7486.55	1653.43	7329.54	5707.94	7110.92	7074.06
M201T252	201.122	252.032	Ile-Leu-Arg	[M+2H]2+			Organic acids and derivatives	Carboxylic acids and derivatives	Amino acids, peptides, and analogues	744.775	2912.23	1558.25	561.954	1052.72	2493.98	3329.77	10577.6	5028.07	9990.44	3485.39	10563.7	8598.8	8541.04	8541.7
M118T260	118.064	259.548	Indole	[M+H]+	HMDB0000738	C00463	Organoheterocyclic compounds	Indoles and derivatives	Indoles	118623	115622	128958	4539.58	76849.8	106404	79997.4	235808	117060	204011	74691	301361	226233	225595	227302
M160T45	160.074	44.968	Indole-3-acetaldehyde	[M+H]+	HMDB0001190	C00637	Organoheterocyclic compounds	Indoles and derivatives	Indoles	11967.7	14782.5	9208.17	12026.7	46956.6	16229.9	33711	15901.3	26315	17458.7	31274.9	28083.3	20302.5	20507.6	22548.4
M175T79	175.085	79.07	Indole-3-acetamide	[M+H]+	HMDB0029739	C02693	Organoheterocyclic compounds	Indoles and derivatives	Indoles	93815	38765.7	136227	15327	159353	208191	93049.8	61687.3	241340	200261	45100.9	99047.9	163574	169307	163271
M130T152	130.064	151.678	Indole-3-carbinol	[M+H-H2O]+	HMDB0005785		Organoheterocyclic compounds	Indoles and derivatives	Indoles	47756.3	46949	57058.9	19305.9	54334.4	52795.6	54092.5	66225.5	57409.2	59013.4	50852.5	81333.4	93176.9	88493.3	93161.1
M158T52	158.059	52.2365	Indole-3-pyruvic acid	[M+H-CH2O2]+	HMDB0060484	C00331	Organoheterocyclic compounds	Indoles and derivatives	Indolyl carboxylic acids and derivatives	125223	129534	153516	60994.9	603880	261715	283204	229600	285479	287507	221841	233407	266571	251064	250837
M158T78	158.059	78.307	Indoleacetic acid	(M+H-H2O)+	HMDB0000197	C00954	Organoheterocyclic compounds	Indoles and derivatives	Indolyl carboxylic acids and derivatives	57979.5	73062.4	40754.5	10131.2	93266.4	64366	63167.9	147960	67649.9	78576.6	78046.2	62623.5	90149.9	90397.2	77799.4
M588T404	588.189	404.043	Ipecoside	[M+Na]+		C09464	Lipids and lipid-like molecules	Prenol lipids	Terpene glycosides	1234.4	1263.19	2221.73	2795.08	8436.63	4422.76	4087.37	2414.96	6092.66	31525.4	1543.01	67193.9	3881.8	4237.37	3868.58
M429T395	429.244	395.171	Irbesartan	[M+H]+	HMDB0015163	C07469	Benzenoids	Benzene and substituted derivatives	Biphenyls and derivatives	14905	15380.5	17915.8	2125.88	8188.57	19528.7	5294.49	12229	14090.1	21831.8	10026.8	18176	16766.8	18244	16748.2
M502T434	502.173	434.029	Irinotecan	[M+H-C5H11N]+	HMDB0014900	C16641				10382.7	7740.57	7607.68	1759.28	4808.45	9523.47	11207.5	21249.2	17484.5	18740.8	9320.87	21951.7	20305	20303.6	20658
M415T53	415.299	53.225	Isodeoxycholic acid	[M+Na]+	HMDB0002536	C17661	Lipids and lipid-like molecules	Steroids and steroid derivatives	Bile acids, alcohols and derivatives	8176.36	12514.6	6025.31	3240.52	5566.25	9771.58	10575.3	11539.1	18625.9	13922.1	7793.81	24124.9	3500.42	3491.8	3760.18
M556T400	556.216	400.087	Isoflavone base + 1o, 1meo, o-hex+c7h12no	[M+H]+			Phenylpropanoids and polyketides	Isoflavonoids	Isoflavonoid O-glycosides	48191.5	30892.1	29560.5	3648.15	11075.6	21367	13663.1	23128.1	11354	20077.4	8401.03	24175.9	28731.4	28954.9	28056.8
M194T332	194.116	331.745	Isoproterenol	[M+H-H2O]+	HMDB0015197	C07056	Benzenoids	Phenols	Benzenediols	58462.9	46501.4	42574.4	148002	58022.1	32949.9	57401.1	3174.54	29080.5	4471.28	48992.2	597.193	6954.12	6817.26	7147.33
M420T453	420.16	453.069	Isorhapontin	[M]+		C10266	Phenylpropanoids and polyketides	Stilbenes	Stilbene glycosides	18994.7	16471.6	17412.8	1062.33	12933.5	25360.9	24389.6	34399.7	23195	51402.1	16884.8	52165.2	47835	47479.4	47834.3
M385T38	385.22	38.32	Isorhynchophylline	[M+H]+		C16980				14951	11008.9	11591.7	7218.83	34751.8	14574	37483	45211.6	58226.2	26186	20868	11049.3	20173.1	20163.2	19402.6
M697T248	697.382	247.985	Izenamide c	[M+Na]+			Organic acids and derivatives	Peptidomimetics	Depsipeptides	2398.59	2212.96	1733.51	279.677	2828.41	1088.66	750.849	6961.52	2678.85	3650.15	1024.62	1768.87	5411.39	5570.88	5413.75
M169T82	169.121	82.2685	Jasmine lactone	(M+H)+						68512.9	40410.1	12428	9446.46	30332.7	102258	33252	75579.5	110143	21343.1	109950	138438	77365.7	76066.6	76087.1
M175T496	175.022	496.151	Juglone	[M+H]+	HMDB0030773	C03840	Benzenoids	Naphthalenes	Naphthoquinones	5056.58	2265.88	7896.38	1372.75	5857.98	9076.32	1711.46	6987.67	3944.39	8780.94	3235.51	20073.8	8608.57	8603.75	9225.72
M318T460_1	318.128	459.579	Kartogenin	[M+H]+			Benzenoids	Benzene and substituted derivatives	Anilides	7214.84	8541.04	9024.61	3859.2	5568.91	8413.88	6699.15	10201.9	17633.9	10454.5	14305.8	15692.7	11774.9	11778.9	13556.9
M595T497	595.146	497.072	Keracyanin	[M]+	HMDB0031458	C08620	Phenylpropanoids and polyketides	Flavonoids	Flavonoid glycosides	10047.3	8018.32	9145.49	1772.92	9434.49	11151.8	8806.63	15699.2	17529.7	21549	10068.8	28398.9	22254.6	21153.8	22265
M348T405	348.137	405.053	Kinetin riboside	[M+H]+						2111.03	2308.2	4589.15	507.934	2183.93	2583.29	2344.19	5610.8	2518.45	5501.55	3041.63	3431.26	7894.53	5615.74	5493.86
M109T93	109.1	93.333	Kinoprene	[M+H-C10H16O2]+		C19042	Lipids and lipid-like molecules	Prenol lipids	Sesquiterpenoids	113303	255836	36009.7	7627.18	54107	45684.9	31485.1	116702	264176	40079.4	49742.3	29602.4	27599.4	27194.6	28324
M461T426	461.125	425.802	Kotanin	[M+Na]+						4787.12	4921.99	5767.06	535.098	5075.99	5331.06	3857.74	6185.06	5557.26	8982.84	6754.3	7687.14	6694.65	6587.4	6590.68
M175T551	175.118	551.057	L-Arginine	(M+H)+	HMDB0000517	C00062	Organic acids and derivatives	Carboxylic acids and derivatives	"Amino acids, peptides, and analogues"	484385	351204	288560	286127	267560	394881	419509	607813	594340	368981	260523	962202	654671	687087	685407
M130T52	130.064	51.726	L-arginine, methyl ester	[M+H-CH5N3]+			Organic acids and derivatives	Carboxylic acids and derivatives	Amino acids, peptides, and analogues	363185	367174	427711	170859	783732	550965	629551	412809	418743	537863	349975	123781	482557	500189	500471
M162T358_2	162.112	357.76	L-carnitine	[M+H]+	HMDB0062496	C00318	Organic nitrogen compounds	Organonitrogen compounds	Quaternary ammonium salts	6.12559e+06	5.79135e+06	6.76145e+06	1.4649e+06	6.2318e+06	5.8164e+06	5.05247e+06	4.34514e+06	5.81003e+06	4.38816e+06	3.64841e+06	5.72407e+06	5.02174e+06	5.02159e+06	4.98803e+06
M271T377	271.074	377.103	L-Carnosine	(M-H+2Na)+	HMDB0000033	C00386	Organic acids and derivatives	Peptidomimetics	Hybrid peptides	7033.78	27338.3	18143.6	2543.82	3542.97	9669	10281.3	10599.5	4666.59	10623.8	13414.2	6998.35	10954.8	11293.3	11293
M176T396	176.102	395.572	L-citrulline	[M+H]+	HMDB0000904	C00327	Organic acids and derivatives	Carboxylic acids and derivatives	Amino acids, peptides, and analogues	76444.1	40733.2	57262.9	18068.8	60713.9	93860.3	111878	233225	126094	193575	109449	254874	159272	159276	155881
M163T255	163.052	254.505	L-Cysteine	(M+CH3CN+H)+	HMDB0000574	C00097				5465.24	5161.31	5119.79	9486.92	785.804	5857.58	6898.71	27680.2	10804	18801.5	5519.48	16702.5	18618.7	18642.4	21676
M427T486	427.093	485.753	L-cysteine-glutathione disulfide	[M+H]+			Organic acids and derivatives	Carboxylic acids and derivatives	Amino acids, peptides, and analogues	175926	213114	205351	63531.7	234387	354593	260666	687872	512033	836690	254985	1.52387e+06	649846	643661	647819
M144T94	144.064	94.0875	L-glutamic acid, dimethyl ester	[M+H-CH4O]+			Organic acids and derivatives	Carboxylic acids and derivatives	Amino acids, peptides, and analogues	231676	124792	263663	24325.3	192079	152123	243252	272769	321373	215578	264556	486430	237509	237305	245788
M308T411	308.09	410.699	L-glutathione, reduced	[M+H]+	HMDB0062697	C00051	Organic acids and derivatives	Carboxylic acids and derivatives	Amino acids, peptides, and analogues	1.22955e+06	2.34975e+06	426455	53872.8	104453	161879	83889.4	294677	63276.7	45033.2	160680	77457.9	161634	161710	169415
M156T513	156.077	513.391	L-Histidine	(M+H)+	HMDB0000177	C00135	Organic acids and derivatives	Carboxylic acids and derivatives	"Amino acids, peptides, and analogues"	1.80813e+06	1.19114e+06	2.94292e+06	253313	2.95579e+06	2.61278e+06	2.53351e+06	2.25694e+06	1.394e+06	2.46853e+06	932406	2.15796e+06	2.03939e+06	2.05097e+06	2.1813e+06
M190T421	190.117	421.399	L-homocitrulline	[M+H]+	HMDB0000679	C02427	Organic acids and derivatives	Carboxylic acids and derivatives	Amino acids, peptides, and analogues	2988.55	2067.5	1895.21	1627.98	2061.42	2534.03	2159.18	2806.02	2100.69	1913.81	2478.3	2253.36	2587.86	2591.3	2510.35
M102T51	102.054	50.531	L-homoserine	[M+H-H2O]+	HMDB0000719	C00263	Organic acids and derivatives	Carboxylic acids and derivatives	Amino acids, peptides, and analogues	341263	281029	304060	25563.4	161664	302851	198690	373580	170948	353551	100801	118916	351346	330986	351338
M116T399	116.07	399.303	L-hydroxyarginine	[M+H-CH5ON3]+	HMDB0004224	C05933	Organic acids and derivatives	Carboxylic acids and derivatives	Amino acids, peptides, and analogues	78803.9	112465	117523	78788.6	107445	134061	103724	128798	136769	121575	85097.9	169196	125141	127307	127313
M147T558	147.112	557.919	L-Lysine	(M+H)+	HMDB0000182	C00047	Organic acids and derivatives	Carboxylic acids and derivatives	"Amino acids, peptides, and analogues"	104451	97385	86487.3	48180.4	114853	96828.7	203071	112144	103098	100314	78452.6	191507	126411	127084	121892
M189T300	189.133	299.738	L-NG-Monomethylarginine	(M+H)+						11998.7	38472.9	3713.71	6784.42	2957.62	4316.33	5963.85	20955.3	11527.5	32360.2	11816.8	34661.9	21959.8	15936.1	15536.1
M173T248	173.127	247.552	L-Norleucine	(M+CH3CN+H)+	HMDB0001645	C01933	Organic acids and derivatives	Carboxylic acids and derivatives	"Amino acids, peptides, and analogues"	64365	85563.2	106633	27042.4	20057.5	126813	64920	382915	195150	322668	91287.4	211763	329950	332834	332849
M400T173	400.341	172.677	L-palmitoylcarnitine	[M+H]+	HMDB0000222	C02990	Lipids and lipid-like molecules	Fatty Acyls	Fatty acid esters	8.14437e+06	6.14466e+06	7.34814e+06	1.48845e+06	2.0518e+06	6.89428e+06	9.17514e+06	9.47141e+06	8.11213e+06	7.88662e+06	5.60135e+06	696900	7.31498e+06	7.2835e+06	7.28363e+06
M130T532	130.085	531.929	L-pipecolic acid	[M+H]+	HMDB0000716	C00408	Organic acids and derivatives	Carboxylic acids and derivatives	Amino acids, peptides, and analogues	1.06613e+06	1.02715e+06	646538	396720	684080	889678	749683	191784	14353.2	891948	783318	182732	1.09947e+06	1.04658e+06	1.09984e+06
M176T369	176.091	368.562	L-Proline	(M+CH3COO+2H)+	HMDB0000162	C00148	Organic acids and derivatives	Carboxylic acids and derivatives	"Amino acids, peptides, and analogues"	12841.6	9718.08	15193.2	5678.47	13387.1	15765.3	8469.09	11659.6	15670.4	9353.49	8370.35	10049	8826.56	9493.79	9530.51
M218T285_1	218.138	285.257	L-propionylcarnitine	[M+H]+	HMDB0062514		Lipids and lipid-like molecules	Fatty Acyls	Fatty acid esters	2.76828e+06	2.41592e+06	2.89603e+06	572492	2.68598e+06	2.9311e+06	8.2887e+06	542676	8.39663e+06	672220	8.65803e+06	525596	1.52113e+06	1.56787e+06	1.5239e+06
M182T327	182.08	326.735	L-Tyrosine	(M+H)+	HMDB0000158	C00082				158495	194189	162831	102367	201403	149940	129662	137688	137058	150636	163814	141178	168224	167104	167110
M628T458	628.29	457.887	L-valinamide, n-(4-methoxy-1,4-dioxobutyl)-l-alanyl-l-alanyl-l-prolyl-n-(4-methyl-2-oxo-2h-1-benzopyran-7-yl)-	[M+H]+			Organic acids and derivatives	Carboxylic acids and derivatives	Amino acids, peptides, and analogues	4436.13	2446.25	5408.98	1475.77	5087.59	8761.19	6982.6	15053.9	11833.4	15067.7	6378.23	17945.8	11304.5	11310.7	10613.8
M365T405_2	365.104	405.425	Lactose	[M+Na]+	HMDB0000186	C00243	Organic oxygen compounds	Organooxygen compounds	Carbohydrates and carbohydrate conjugates	185390	253338	249574	80823.9	177467	210923	227470	241433	230453	248802	221669	359493	267107	242761	242948
M343T147	343.294	147.31	Lauramidopropylbetaine	[M]+			Organic acids and derivatives	Carboxylic acids and derivatives	Amino acids, peptides, and analogues	3216.18	2784.88	2691.51	2500.51	3300.08	4250.87	3131.64	22780.1	2409.45	33749.7	2128.92	118258	76213.1	76255.2	74826.9
M228T68_2	228.267	67.936	Laurylguanidine	[M+H]+			Organic nitrogen compounds	Organonitrogen compounds	Guanidines	34933	48239.4	57854.9	2304.89	2999.15	105041	4099.7	141171	3889.17	89451.9	1992	106880	74374.2	85059.3	85057.7
M215T36	215.159	35.513	Lavandulol	(M+CH3COO+2H)+						6999.43	14542.4	6968.28	2479.42	16685.3	7031.85	14378.4	27529.8	23308.6	39488.1	6788.27	33839.2	14833.8	13515.6	14819.4
M541T214	541.346	213.62	Leptomycin b	[M+H]+			Lipids and lipid-like molecules	Fatty Acyls	Fatty acids and conjugates	7587.21	5625.81	3562.7	475.387	6829	2144.93	5063.52	2354.64	2595.24	619.607	1149.33	286.835	470.533	493.734	493.714
M260T418	260.17	417.755	Leu-Gln	[M+H]+			Organic acids and derivatives	Carboxylic acids and derivatives	Amino acids, peptides, and analogues	22299.6	27049.3	25190.2	4984.81	24288	30133.4	19295.3	53052.5	30497	49602.8	21710.4	63793	45827.2	45814.9	48007.8
M245T202	245.185	201.72	Leu-Leu	(M+H)+						14798.2	9875.38	18277.7	4719.98	12839.8	15059	7862.05	1108.13	9063.9	1366.11	8006.03	1433.1	2279.88	2283.36	2467.88
M229T249_2	229.153	249.186	Leu-Pro	[M+H]+			Organic acids and derivatives	Carboxylic acids and derivatives	Amino acids, peptides, and analogues	17124.2	18844.6	21213.8	3139.26	340.263	35589.7	27885.5	56923.3	38829.5	58990	26120.5	72301.5	54059.5	55814.1	54780.6
M231T300	231.169	300.029	Leu-Val	(M+H)+						1209.69	2500.45	2580.51	671.188	1910.69	3061.99	2777.84	3423.73	3606.19	3510.84	2310.49	3065.44	4041.86	3801.01	3797.4
M384T444	384.148	444.405	Lewis x trisaccharide	[M+H-C6H10O4]+	HMDB0006568		Lipids and lipid-like molecules	Fatty Acyls	Fatty acyl glycosides	7072.95	4469.26	5487.23	1207.55	5486.98	4618.26	4349.89	10825.5	4923.2	7144.78	5721.29	10155.9	4871.19	4847.81	5577.19
M235T37	235.179	36.781	Lidocaine	[M+H]+	HMDB0014426	C07073	Benzenoids	Benzene and substituted derivatives	Xylenes	249694	357416	287273	66584.8	290545	437308	378532	528039	374288	828859	249013	1.05043e+06	661075	655214	655202
M892T506	892.289	506.404	Lnfp iii	[M+K]+			Organic oxygen compounds	Organooxygen compounds	Carbohydrates and carbohydrate conjugates	126752	167722	142602	44736.5	161927	164652	217330	218346	223182	216342	217402	202646	154740	155789	154738
M730T489	730.235	488.503	Lnt	[M+Na]+	HMDB0006566		Organic oxygen compounds	Organooxygen compounds	Carbohydrates and carbohydrate conjugates	115523	168875	184530	71350.6	171759	156956	198592	155629	180516	189969	197653	152722	133862	128301	128341
M1016T412	1015.54	412.099	Loggerpeptin a	[M+Na]+			Organic acids and derivatives	Peptidomimetics	Depsipeptides	2421.66	2011.89	1386.89	740.8	2033.98	4371.35	2797.44	5306.28	2947.82	3474.53	3082.13	5777.75	2945.82	3241.26	3239.17
M522T170	522.352	169.513	Lpc 18:1	[M+H]+			Lipids and lipid-like molecules	Glycerophospholipids	Glycerophosphocholines	149961	7896.93	44629.7	1183.81	8580.82	253388	34503.2	1.76931e+06	45909	1.76869e+06	43343.5	860406	1.57804e+06	1.57812e+06	1.5645e+06
M520T190	520.338	190.237	Lpc 18:2	[M+H]+			Lipids and lipid-like molecules	Glycerophospholipids	Glycerophosphocholines	1.18035e+06	516729	1.12248e+06	70023.3	438932	1.05298e+06	810731	1.12842e+06	993691	922532	388274	375656	1.02582e+06	1.03321e+06	1.03324e+06
M243T59	243.087	58.686	Lumichrome	[M+H]+		C01727	Organoheterocyclic compounds	Pteridines and derivatives	Alloxazines and isoalloxazines	666329	792698	767934	236169	325211	1.00129e+06	728550	994529	506501	938161	859657	610059	1.04311e+06	1.04134e+06	1.03974e+06
M261T462	261.154	462.432	Lys-Asn	[M+H]+			Organic acids and derivatives	Carboxylic acids and derivatives	Amino acids, peptides, and analogues	4036.82	4034.32	5239.76	2891.35	6032.28	9169.65	4730.54	12143.8	4802.18	16031	3123.54	6278.06	10515.8	10176.6	10161
M262T468	262.138	468.103	Lys-Asp	[M+H]+			Organic acids and derivatives	Carboxylic acids and derivatives	Amino acids, peptides, and analogues	15741.5	10657.6	9540.96	5309.38	9539.51	13806.5	10372.6	39646.2	17760.2	34409.4	12107.7	31971.7	33500.2	32104.8	32037.8
M204T199	204.122	199.163	Lys-Gly	[M+H]+			Organic acids and derivatives	Carboxylic acids and derivatives	Amino acids, peptides, and analogues	44335.5	38134.5	47188.1	737.54	39377	38446.6	37038.2	43829.4	39186.2	50359.7	33106	49290.5	42775.7	42331.9	42777.1
M202T523	202.154	522.726	Lys-Lys-Lys	[M+2H]2+			Organic acids and derivatives	Carboxylic acids and derivatives	Amino acids, peptides, and analogues	2633.82	2500.01	2371.18	1251.89	2377.47	3075.78	2087.08	2090.2	2536.28	2575.41	2050.65	3491.17	2504.96	2121.91	2111.99
M276T423	276.165	422.655	Lys-Phe	(M+H-H2O)+						4661.49	1374.96	2992.57	4685.99	1071.17	3396.1	6073.78	5865.51	4296.32	2575.56	4102.07	5870.24	4403.94	5249.43	5290.66
M203T360	203.138	360.28	Lys-Phe-Lys	[M+2H-NH3]2+			Organic acids and derivatives	Carboxylic acids and derivatives	Amino acids, peptides, and analogues	131334	114471	125077	109991	123321	116148	107238	85391.1	129306	89088.1	112191	94859.3	84744.3	84759.4	85893.3
M244T479_2	244.164	479.119	Lys-Pro	(M+H)+						19315.5	49121.9	23686.1	13731.1	70455.4	27601.4	45032.1	100300	189286	88062	56161.2	119216	68477.9	61867.1	68526.2
M377T481	377.166	481.455	Lys-Trp	(M-H+2Na)+						315.4	215.514	1250.12	408.214	787.459	488.179	624.473	3057.08	2137.25	4015.91	1546.66	1811.43	1431.41	1046.89	1436.42
M465T206	465.343	205.538	Lyso-sphingomyelin	[M+H]+			Lipids and lipid-like molecules	Sphingolipids	Phosphosphingolipids	22555.6	20944.6	21039.7	3124.87	9214.57	22392.2	20419.1	30120.8	20856.5	24860.2	12548.5	6230.79	26784.2	26207.6	26212.9
M248T399	248.111	399.301	Malonyl-l-carnitine	[M+H]+	HMDB0062592		Lipids and lipid-like molecules	Fatty Acyls	Fatty acid esters	3517.2	4325.31	5038.84	1742.71	3034.68	4647.97	3651.04	5829.37	5385.55	9805.48	3336.23	10022.7	6040.38	6205.2	6045.13
M127T45	127.038	45.485	Maltol	[M+H]+	HMDB0030776	C11918	Organoheterocyclic compounds	Pyrans	Pyranones and derivatives	34857.4	36774.3	40330.1	15380.3	85246.4	52279.4	96139.3	143365	125978	124846	111712	93336.9	118593	126143	118531
M360T409_2	360.147	408.575	Maltose	[M+NH4]+	HMDB0000163	C00208	Lipids and lipid-like molecules	Fatty Acyls	Fatty acyl glycosides	38036.9	30601.4	30299.7	2343.38	32694.7	27114.5	24589.9	33731.4	25472.1	42098.5	12123.1	22015.6	27261.2	24340.4	24102.9
M689T493	689.206	493.192	Maltotetraose	[M+Na]+	HMDB0001296	C02052	Organic oxygen compounds	Organooxygen compounds	Carbohydrates and carbohydrate conjugates	3822.07	3606.17	3748.25	3758.21	4803.7	5625.37	3037.02	1815.74	3562.62	6473.4	6848.17	2996.79	3410.26	3766.64	3756.28
M933T500	933.314	499.683	Man3 a	[M+Na]+			Organic oxygen compounds	Organooxygen compounds	Carbohydrates and carbohydrate conjugates	9483.27	12124.3	12565.5	4794.91	11384.7	13464.3	17731.6	14811.4	16602	12249.7	19634.2	14778.5	11899.6	11930.3	10859.2
M417T418	417.269	418.156	Manoalide	[M+H]+		C17156	Lipids and lipid-like molecules	Prenol lipids	Terpene lactones	12197.2	10432	12990.2	1572.05	9700.07	14620.1	11824.7	28629.7	19002	28623.6	11525.1	47547	27493.2	27490.3	27882.7
M533T487	533.254	487.284	Manumycin a	[M+H-H2O]+		C12111	Organic oxygen compounds	Organooxygen compounds	Carbonyl compounds	2777.75	2065.92	6242.42	1793.92	3961.9	3536.26	4020.03	3606.93	4658.37	6866.9	2596.36	3881.48	2618.12	1907.28	2541.32
M430T34_1	430.242	33.903	Mebeverine	[M+H]+			Benzenoids	Benzene and substituted derivatives	Benzoic acids and derivatives	101297	110178	81881.1	76992	61861.5	96035.4	97565.5	80398.7	80300.4	65397.6	46990.3	83210.2	75537.5	75639.5	89982.3
M255T224_2	255.119	223.768	Melatonin	[M+Na]+	HMDB0001389	C01598	Organoheterocyclic compounds	Indoles and derivatives	Indoles	30366.8	40332.8	11244.7	1281.61	24676.1	25391.9	22786.4	13620.8	49179.8	7972.36	16181.6	4789.45	2441.3	2276.07	2433.69
M543T434	543.129	434.281	Melezitose	[M+K]+	HMDB0011730	C08243	Organic oxygen compounds	Organooxygen compounds	Carbohydrates and carbohydrate conjugates	2437.57	2629.01	4209.7	590.133	3136.6	2701.7	2527.42	4331.35	1782.22	2002.6	4348.74	1775.96	3495.72	2696.36	3494.58
M360T449_1	360.128	449.358	Melibiose	[M+NH4]+	HMDB0000048	C05402	Lipids and lipid-like molecules	Fatty Acyls	Fatty acyl glycosides	5219.85	4342.76	4444.82	5535.27	6898.06	4082.47	3661.49	2664.33	2219.38	3492.38	4486.69	4065.85	2375.37	2071.16	2366.51
M352T29	352.04	28.696	Meloxicam	[M+H]+	HMDB0014952	C08169				44369.4	47104	48635.7	4220.12	41062.1	49049.2	15779.7	26494.3	20533.6	29737.2	16952.2	53895	54503.3	55140.9	54525
M263T206	263.141	206.018	Met-Leu	(M+H)+						5738.42	4512.62	6587.47	1710.03	3677.34	4391.49	3585.06	4039.48	3533.89	8735.24	3477.3	9371.74	4498.71	4497.25	4241.4
M437T37	437.191	37.437	Met-Met-Arg	[M+H]+			Organic acids and derivatives	Carboxylic acids and derivatives	Amino acids, peptides, and analogues	407931	344660	591196	364276	437265	435938	524956	373417	371617	367480	446344	517300	493549	487134	480911
M393T58	393.209	58.165	Met-Ser-Arg	[M+H]+			Organic acids and derivatives	Carboxylic acids and derivatives	Amino acids, peptides, and analogues	9836.09	12471	6954.28	3183.73	10703.6	14061.1	10505.5	17690.1	21702.2	23578	11310.9	23691.6	20277.5	20277.6	19820
M130T214_2	130.121	214.147	Metformin	[M+H]+	HMDB0001921	C07151	Organic nitrogen compounds	Organonitrogen compounds	Guanidines	17226.8	13814.7	13375.7	6076.08	14425.7	8875.06	13642.7	5300.35	8330.88	8181.75	5150.11	10555.6	5129.89	5129.91	5230.03
M283T365	283.024	365.093	Methamidophos	[2M+H]+	HMDB0031803	C18667	Organophosphorus compounds	Organothiophosphorus compounds	Phosphoramidothioic-acid-O,S-diesters	18213.2	15581.3	19079	1609.63	16597.1	24964.7	11918.3	45534.5	22449.6	43582.5	15423.9	77355.2	44044.7	43887.5	43886.9
M204T361	204.122	360.94	Methsuximide	[M+H]+	HMDB0015611		Organoheterocyclic compounds	Pyrrolidines	Phenylpyrrolidines	49708.5	39610.1	41276.2	9029	49416.8	77351.3	39954.5	38071.7	34937.9	59091.8	32170.1	34366.9	44551	47530.1	44547.5
M269T35	269.247	34.807	Methyl palmitoleate	[M+H]+			Lipids and lipid-like molecules	Fatty Acyls	Fatty acid esters	27978.5	74772.3	20362.5	7115.75	45053.4	54522.2	60208.1	99905	111913	61067.6	42079.8	53804.9	38858.3	39084.7	34765
M121T34	121.027	34.035	Methyl salicylate	[M+H-CH4O]+	HMDB0034172	C12305	Benzenoids	Benzene and substituted derivatives	Benzoic acids and derivatives	240725	191877	206080	72771.7	124340	242118	201977	209530	128857	172755	113936	128675	216081	213349	216099
M196T48	196.095	48.096	Methyltyrosinate	[M+H]+	HMDB0029217	C03404	Organic acids and derivatives	Carboxylic acids and derivatives	Amino acids, peptides, and analogues	93906.4	99246	98370.4	37891.1	130518	93706.4	151635	166547	146690	133208	161839	90935.9	102103	102114	102791
M449T484	449.074	484.389	Mevinphos	[2M+H]+		C18688	Lipids and lipid-like molecules	Fatty Acyls	Fatty acid esters	22104.7	62797.8	38241.9	6370.57	43274.2	44381.9	56266.9	71235.9	70416.7	83254.8	50737.3	101178	54692.7	52568.3	54701.9
M498T418	498.264	418.24	Microcystin lr	[M+2H]2+		C05371	Organic acids and derivatives	Peptidomimetics	Hybrid peptides	3639.59	3686.37	3148.59	551.599	2511.48	3817.62	4191.42	9776.65	5331.05	9466.24	5433.58	8108.67	7336.89	7163.58	7342.52
M208T120	208.117	120.484	Miglitol	[M+H]+	HMDB0014634	C07708				46565.2	121903	60013.8	14442.7	99569.5	48950.5	20589.3	85778.6	76004.2	39135	13852.5	139294	68882.9	66735	66649.7
M230T77	230.139	76.977	Milnacipran	[M+H-NH3]+	HMDB0015602		Benzenoids	Benzene and substituted derivatives	Phenylacetamides	79077.3	87624.4	61440.8	43009.1	87345	142239	74289.4	73317.7	95088.9	51280.7	81101	88839.8	48717.1	65824.8	65753.3
M184T179	184.072	179.397	Miltefosine	[M+H-C16H32]+			Organic nitrogen compounds	Organonitrogen compounds	Quaternary ammonium salts	159252	137933	128158	20330.8	21389.3	84539.9	46547.5	22508.9	37069.2	10291	40913.5	7283.36	14232.6	12509.9	14452.4
M223T66	223.131	65.885	Mitoxantrone	[M+2H]2+	HMDB0015335	C11195	Benzenoids	Anthracenes	Anthraquinones	48452	83558.1	56209.4	50429.3	52204	101138	78711.2	358164	251415	76444.1	89295.1	58186.7	36296.8	42788.2	42863.7
M188T227	188.127	227.458	Molinate	[M+H]+		C11086				71276.6	66258.4	39572.1	6727.54	40714.2	32418.8	39016.7	76097.8	43613.8	29067.3	27181.6	57267.6	18152.6	18135.1	14734.4
M339T76	339.288	76.094	Monoelaidin	[M+H-H2O]+			Lipids and lipid-like molecules	Glycerolipids	Monoradylglycerols	120986	77040.6	112597	38663.4	29842.7	67337.1	45750.6	158890	122105	121454	132240	148644	36243	27976.2	35595.7
M335T36_2	335.257	36.143	Monolinolenin (9c,12c,15c)	[M+H-H2O]+			Lipids and lipid-like molecules	Fatty Acyls	Lineolic acids and derivatives	61973.8	132301	96097.4	46887.8	92508.5	82038.5	186344	62112.5	186321	28814.4	103668	98411.7	106449	106217	67897.6
M603T467_1	603.26	467.205	Morphine n-oxide	[2M+H]+		C11786				2376.07	1221.21	3064.85	733.132	2315.98	3520.87	2730.66	3111.86	3221.61	5739.94	3177.37	9307.01	5523.63	5810.81	5816.29
M491T478	491.181	477.976	Mubritinib	[M+Na]+			Benzenoids	Benzene and substituted derivatives	Phenylbutylamines	246.812	2132.27	840.357	1431.12	3001.88	743.709	3243.8	997.351	5055.42	3366.14	4215.11	2875.34	1339.81	1338.76	1488.37
M289T250_2	289.125	250.22	Myclobutanil	[M+H]+		C18477	Benzenoids	Benzene and substituted derivatives	Halobenzenes	1592.55	2502.17	3594.66	1224.15	1592.46	4270.77	2204.88	8390.22	9931.03	5126.98	3404.97	5512.45	5238.13	5238.66	5268.48
M372T177	372.31	176.613	Myristoyl-l-carnitine	[M+H]+	HMDB0005066		Lipids and lipid-like molecules	Fatty Acyls	Fatty acid esters	1.93407e+06	1.52571e+06	1.77842e+06	299939	1.15063e+06	1.9894e+06	2.2647e+06	3.12179e+06	2.94336e+06	2.7719e+06	2.2468e+06	712784	2.37478e+06	2.37684e+06	2.38346e+06
M110T383_2	110.07	383.448	N-.alpha.-(tert-butoxycarbonyl)-l-histidine	[M+H-C6H10O4]+			Organic acids and derivatives	Carboxylic acids and derivatives	Amino acids, peptides, and analogues	582475	640671	771469	135283	635160	918373	403743	1.34345e+06	908005	1.71552e+06	626371	2.06719e+06	1.46388e+06	1.45216e+06	1.45713e+06
M157T326	157.096	326.093	N-.alpha.-acetyl-l-ornithine	[M+H-H2O]+	HMDB0003357	C00437	Organic acids and derivatives	Carboxylic acids and derivatives	Amino acids, peptides, and analogues	410808	290939	336623	51378.9	182572	212954	329306	10899.4	361003	34668.7	307591	2279.36	100062	103418	100132
M191T238	191.047	237.666	N-(2-acetamido)iminodiacetic acid	[M+H]+			Organic acids and derivatives	Carboxylic acids and derivatives	Amino acids, peptides, and analogues	4007.75	1884.81	1952.48	1293.5	4291.09	159.503	8361.81	37415.8	1773.21	29769	1534.55	37414.8	21353.4	20729.3	20731.7
M244T283_2	244.078	283.225	N-(2-hydroxypropionyl)-4-methylbenzenesulfonamide	[M+H]+			Benzenoids	Benzene and substituted derivatives	Benzenesulfonamides	167173	181917	295990	38931.5	250978	287548	161394	13088.4	209812	104421	226441	4780.68	160952	169854	169849
M255T371	255.096	370.584	N-(4-fluorobenzoyl)-5-amino-1h-indole	[M+H]+			Benzenoids	Benzene and substituted derivatives	Benzoic acids and derivatives	58776.7	89730.8	273018	33582.2	142584	204068	156730	267933	98776.2	863454	220158	314585	294119	246300	294640
M227T436	227.063	436.178	N-(aminothioxomethyl)-5-oxo-1-propyl-2-pyrrolidineacetamide	[M+H-NH3]+			Organic acids and derivatives	Carboxylic acids and derivatives	Amino acids, peptides, and analogues	15003.4	19178.5	18541.8	2923.3	14860.5	32717.4	34074.6	49179.5	36463.1	75396.1	36727	76000.5	53282.8	50198.6	53303.6
M238T190_1	238.106	190.362	N-(phenylacetyl)-l-phenylalanine	[M+H-CH2O2]+	HMDB0002372		Organic acids and derivatives	Carboxylic acids and derivatives	Amino acids, peptides, and analogues	79060	76523.5	94444.9	1265.93	84443.9	89078.1	76784.2	108773	89144.5	110886	67952.9	108863	112443	110930	110941
M487T459	487.163	459.336	N-[tris(hydroxymethyl)methyl]-3-aminopropanesulfonic acid	[2M+H]+			Organic acids and derivatives	Organic sulfonic acids and derivatives	Organosulfonic acids and derivatives	8899.81	6000.95	5118.64	900.957	4477.19	3147.26	5202.38	14424.8	8268.24	12241.1	6537.31	13668.4	13540.4	13540.4	13476.5
M219T46	219.112	46.275	N-acetyl-5-hydroxytryptamine	[M+H]+	HMDB0001238	C00978	Organoheterocyclic compounds	Indoles and derivatives	Hydroxyindoles	29022.8	41381.3	35796.1	23213.4	79731.4	35791.7	95202.9	16335.3	42527.2	51391.6	98851.2	78447.2	19035.7	26581.7	26431.6
M204T442	204.086	441.931	N-acetyl-d-glucosamine	[M+H-H2O]+	HMDB0000215	C00140	Organic oxygen compounds	Organooxygen compounds	Carbohydrates and carbohydrate conjugates	1.39686e+06	1.17138e+06	1.33261e+06	290459	1.18362e+06	1.38892e+06	952393	1.72284e+06	1.27457e+06	1.73483e+06	942497	1.93003e+06	1.69603e+06	1.70987e+06	1.67788e+06
M406T375	406.13	374.881	N-acetyl-d-lactosamine	[M+Na]+	HMDB0006583	C00611	Lipids and lipid-like molecules	Fatty Acyls	Fatty acyl glycosides	267291	239171	220491	52804.9	189956	221733	213211	402088	291841	329726	223334	424238	306129	309331	309339
M305T455	305.097	455.324	N-acetylaspartylglutamic acid	[M+H]+	HMDB0001067	C12270	Organic acids and derivatives	Carboxylic acids and derivatives	Amino acids, peptides, and analogues	699211	607534	694546	55384.9	527071	743203	696714	1.58713e+06	1.04165e+06	1.47291e+06	731918	1.99425e+06	1.36445e+06	1.36445e+06	1.34702e+06
M465T261	465.167	260.805	N-acetylglucosamine	[2M+Na]+	HMDB0000215	C00140	Organic oxygen compounds	Organooxygen compounds	Carbohydrates and carbohydrate conjugates	252901	250035	525143	2184.86	250302	578348	124605	662161	260578	1.52902e+06	247411	842753	955328	958905	961469
M189T396	189.086	395.71	N-acetylglutamine	[M+H]+	HMDB0006029		Organic acids and derivatives	Carboxylic acids and derivatives	"Amino acids, peptides, and analogues"	267293	198624	242732	27522.8	144073	149527	208184	409120	284700	447612	260081	537178	348823	344734	344718
M198T325	198.086	325.332	N-acetylhistidine	[M+H]+	HMDB0014748	C02997	Organic acids and derivatives	Carboxylic acids and derivatives	Amino acids, peptides, and analogues	11983.7	11309.9	12851.5	5133.47	13751	13783.6	13799.2	897.99	16847.2	5586.21	16248.9	135.117	9906.55	9735.58	9733.12
M192T214	192.068	213.762	N-acetylmethionine	[M+H]+	HMDB0011745	C02712	Organic acids and derivatives	Carboxylic acids and derivatives	Amino acids, peptides, and analogues	8733.08	5292.73	4583.23	657.144	5150.61	6401.2	7384.15	9696.63	7598.62	3273.31	7482.95	9844.89	2635	2355.4	2300.36
M131T325	131.117	325.286	N-Acetylputrescine	(M+H)+	HMDB0002064/HMDB0060268	C02714	Organic acids and derivatives	Carboximidic acids and derivatives	Carboximidic acids	13868	14517.1	15226.4	8880.81	18002.7	13852.8	11996.5	1971.07	8465.15	3172.61	12771.1	724.669	5254.96	5116.94	5120.45
M440T193	440.333	193.302	N-arachidonoyldopamine	[M+H]+			Benzenoids	Phenols	Benzenediols	6092.09	1875.97	2584.09	2089.33	1566.2	7539.44	3470.17	6836.12	4537.11	6784.45	6155.01	760.029	6480.7	5833.98	6483.72
M191T444	191.065	444.448	N-Carbamylglutamate	(M+H)+						8121.7	3267.39	8354.01	1819.64	4658.91	8172.63	12131.8	30420	21713.6	8994.48	10877.3	14953.9	7705.93	8571.88	7826.73
M176T77	176.07	76.995	N-carboxyethyl-.gamma.-aminobutyric acid	[M+H]+	HMDB0002201		Organic acids and derivatives	Carboxylic acids and derivatives	Amino acids, peptides, and analogues	13284.5	12605.2	15322.4	3157.56	26897.8	29949.1	9559.58	266986	20562.5	303973	17031	117435	268029	245525	267757
M233T482	233.148	482.111	N-desbutylbupivacaine	[M+H]+	HMDB0060725		Organic acids and derivatives	Carboxylic acids and derivatives	Amino acids, peptides, and analogues	4255.61	2580.69	2506.15	2455.05	3484.21	3166.32	6633.93	6860.41	7221.72	13751.2	3317.84	13103.6	3658.09	3161.7	3215.69
M787T175	786.65	175.303	N-Docosanoyl-4-sphingenyl-1-O-phosphorylcholine	M+						56226.4	48570.5	34238.9	14067	74138.9	59266.8	2702.36	48778.4	164584	41222.4	183730	8632.59	16259.2	44734.6	41844.2
M186T146	186.221	146.465	N-dodecylamine	[M+H]+			Organic nitrogen compounds	Organonitrogen compounds	Amines	128279	29974.3	23367.9	8400.58	15440.3	38010.9	63009.1	54815.6	28604.1	28932.8	39461.5	1549.58	59805.3	62712.6	62695.4
M648T183	647.508	182.983	N-lauroyl-d-erythro-sphingosylphosphorylcholine	[M+H]+	HMDB0012096		Lipids and lipid-like molecules	Sphingolipids	Phosphosphingolipids	96662.1	113616	98243.9	9801.56	13580.3	78022.8	56884.7	18474.8	19198.8	5790.58	25898.1	6248.62	8925.51	9485.88	9233.8
M144T211_1	144.064	210.83	N-methyl-l-glutamic acid	[M+H-H2O]+	HMDB0062660	C01046	Organic acids and derivatives	Carboxylic acids and derivatives	Amino acids, peptides, and analogues	30683.5	13829.3	14216	2130.16	12883.5	14868.6	20673.8	2154.8	19786.4	4572.03	16390.5	4493.68	10906.8	11329.9	11329.5
M512T35	512.499	34.901	N-myristoylsphinganine	[M+H]+	HMDB0011759		Lipids and lipid-like molecules	Sphingolipids	Ceramides	136295	144501	155385	16573.7	17025.5	64255.4	25202.5	9478.36	21439.7	8513.36	22345.8	30702.6	5280.74	6020.17	6041.17
M101T387	101.059	387.279	N-nitrosopyrrolidine	[M+H]+	HMDB0031642	C19285				31471.7	20716	33318.6	7434.89	28376.6	35117.9	19650.4	54874.3	42226.3	102157	46462.5	78965.5	48979.5	52766.7	48833.6
M210T330	210.133	330.274	N-octanoyl-l-homoserine lactone	[M+H-H2O]+		C21199	Organic acids and derivatives	Carboxylic acids and derivatives	Amino acids, peptides, and analogues	33019.1	81851.6	35875.6	9768.59	34684	13393.6	16534.8	2589.6	53424.6	3330.41	12291.2	856.517	11575.4	11576.6	11491.8
M390T93	390.356	93.449	N-octanoylsphingosine	[M+H-2H2O]+			Lipids and lipid-like molecules	Sphingolipids	Ceramides	15821.5	10971	14331.4	2228.05	4131.15	17680.6	14892.4	21942.4	22004	16574.6	5670.83	18726.6	13025.3	13029.6	12088.2
M730T178	729.587	177.732	N-oleoyl-d-erythro-sphingosylphosphorylcholine	[M+H]+	HMDB0012101		Lipids and lipid-like molecules	Sphingolipids	Phosphosphingolipids	1.87656e+06	1.81356e+06	1.61e+06	191956	205446	848424	326373	90392.1	260126	70121.3	283582	129297	47130.3	47739.5	49181.4
M521T36_1	520.505	36.107	N-palmitoyl-d-sphingosine	[M+H-H2O]+	HMDB0004949		Lipids and lipid-like molecules	Sphingolipids	Ceramides	215692	178525	142435	28184.3	16607.9	69427.5	32648.5	14120.2	25856.3	28347.8	27959.9	52708.9	11996.9	15017.9	14707.7
M375T437	375.112	436.803	N-succinyl-5-aminoimidazole-4-carboxamide ribose	[M+H]+			Nucleosides, nucleotides, and analogues	Imidazole ribonucleosides and ribonucleotides	1-ribosyl-imidazolecarboxamides	7715.28	3654.73	4742.75	2441.23	3726.73	2694.97	5682.06	12657.4	7300.09	13802.8	9604.13	24745.7	10566.7	10576	10859.6
M816T626	815.704	625.715	N-tetracosanoyl-4-sphingenyl-1-o-phosphorylcholine	[M+H]+			Lipids and lipid-like molecules	Sphingolipids	Phosphosphingolipids	2662.1	2247.76	3507.06	2985.65	6568.54	2137.5	1674.81	2525.51	2480.46	2401.77	2385.96	2427.39	3143.58	3000.15	2936.65
M74T44	74.0593	44.412	N,n-dimethylformamide	[M+H]+	HMDB0001888	C03134	Organic acids and derivatives	Carboxylic acids and derivatives	Carboxylic acid derivatives	86234.8	102729	119908	30592.8	106110	132759	172307	108870	154775	125945	86332.6	121629	88616.3	96073.8	88644.6
M407T442	407.164	441.965	N,n'-diacetylchitobiose	[M+H-H2O]+	HMDB0003556	C01674	Organic oxygen compounds	Organooxygen compounds	Carbohydrates and carbohydrate conjugates	302907	264946	328432	42290.7	278385	316454	210619	390973	306114	400623	206606	462975	388173	388384	378810
M229T405	229.117	404.87	N,n'-diallyl-2,3-dihydroxysuccinamide	[M+H]+			Lipids and lipid-like molecules	Fatty Acyls	Fatty amides	92484	36541.9	85388.5	14137.1	69526.3	24169.8	73669.3	172500	137625	176336	92097.7	224256	142671	132716	142638
M261T67	261.13	67.434	N,n'-diphenyl-p-phenylenediamine	[M+H]+		C14501	Benzenoids	Benzene and substituted derivatives	Aniline and substituted anilines	81560.4	72170.9	49282	17128.4	78909	89868.5	41173.6	164927	122234	106579	55632.3	95155.6	87177.1	89351.3	89461.1
M241T113	241.143	112.72	N,n`-dimethyl-n,n`-diphenylurea	[M+H]+		C09729	Benzenoids	Benzene and substituted derivatives	N-phenylureas	91904	108356	34893.5	5721.88	40660.4	107231	27776.4	199861	119719	64324.1	26244.4	69854.1	46626.9	46136.3	42714.5
M161T301	161.127	301.135	N.epsilon.-methyl-l-lysine	[M+H]+	HMDB0002038	C02728	Organic acids and derivatives	Carboxylic acids and derivatives	Amino acids, peptides, and analogues	18688.9	19857.3	13775	11919.8	13795.8	17981	14432.6	13072.1	23907.2	8402.25	14260.6	15253.2	21572.8	22477.9	21598.1
M220T428	220.081	428.303	N.omega.-nitro-l-arginine	[M+H]+			Organic acids and derivatives	Carboxylic acids and derivatives	Amino acids, peptides, and analogues	4243.86	3981.05	28138	2239.08	23883.8	38256.5	37102.7	45330.8	35107.7	61581.8	4974.2	81322.6	50806	53737.4	50742.2
M188T294	188.175	294.47	N1-Acetylspermidine	(M+H)+						38566.9	60583.8	45999.7	114983	35524.9	31180.5	96157.7	55946	61056.6	37294.6	76648.9	40579.7	23394	11997.7	17417.6
M287T292	287.243	292.248	N1,N12-Diacetylspermine	(M+H)+						1452.92	2539.56	3219.98	1887.33	4335.43	2155.19	5356.06	861.421	1422.52	1443.55	1853.25	1139.45	641.836	429.716	409.356
M241T50	241.058	50.0605	N2-Acetyl-L-ornithine	(M-2H+3Na)+	HMDB0003357	C00437	Organic acids and derivatives	Carboxylic acids and derivatives	"Amino acids, peptides, and analogues"	5647.87	8228.87	2369.84	750.256	1057.16	244.113	4668.19	17216.4	154.878	390.686	304.799	8919.72	1058.71	2418.92	1150.21
M189T526	189.159	525.523	N6,N6,N6-Trimethyl-L-lysine	[M+H]+	HMDB0001325	C03793	Organic acids and derivatives	Carboxylic acids and derivatives	Amino acids, peptides, and analogues	1.01363e+06	1.01316e+06	640751	255415	738695	919767	718204	766027	731098	540705	556808	969741	612795	612226	537637
M664T443	664.115	443.297	NAD+	[M]+	HMDB0000902	C00003				5.3273e+06	4.81523e+06	4.91351e+06	1.57969e+06	4.61736e+06	5.21328e+06	4.79563e+06	7.50436e+06	5.45839e+06	7.35186e+06	4.76013e+06	9.10976e+06	7.39728e+06	7.39729e+06	7.44344e+06
M666T413	666.129	413.176	NADH	[M+H]+	HMDB0001487	C00004				38986.1	46246.5	36311.9	1153.66	3074.48	15145	27403.4	153582	44287.1	67682.9	20850.8	110566	95723.3	95095.2	95096.9
M231T237_2	231.112	236.7	Naproxen	[M+H]+	HMDB0001923	C01517	Benzenoids	Naphthalenes		30434.2	12136.2	13111.6	4096.86	10017.7	1088.21	31861.3	88999.7	3192.97	90589.5	4092.2	86342.3	87710.3	86195.9	87705.9
M273T37	273.09	37.437	Naringenin	[M+H]+	HMDB0002670	C00509	Phenylpropanoids and polyketides	Flavonoids	Flavans	206231	225243	251728	71248.6	205560	211921	135188	240677	176177	224230	179954	374113	250956	242339	242298
M344T246	344.136	245.886	Neohesperidose	[M+NH4]+		C08244	Lipids and lipid-like molecules	Fatty Acyls	Fatty acyl glycosides	3553.22	170.49	363.713	803.468	202.317	1995.59	1244.47	5105.7	4802.28	18345.4	3739.9	10996.5	9053.32	8839.57	9068.17
M203T481	203.149	480.799	Ng,ng-dimethyl-l-arginine	[M+H]+	HMDB0001539	C03626	Organic acids and derivatives	Carboxylic acids and derivatives	Amino acids, peptides, and analogues	184133	646228	160027	56975.7	122151	177757	128410	344298	247382	384978	141079	478035	370168	370673	429833
M203T578	203.149	577.523	NG,NG-dimethyl-L-arginine(ADMA)	(M+H)+						199815	202368	122564	105006	162052	215653	183829	188508	255288	37251.6	187805	443002	318700	353351	353123
M123T64	123.055	63.735	Niacinamide	[M+H]+	HMDB0001406	C00153	Organoheterocyclic compounds	Pyridines and derivatives	Pyridinecarboxylic acids and derivatives	2.44663e+06	2.0601e+06	3.1995e+06	546708	3.00905e+06	3.93751e+06	2.02156e+06	4.38772e+06	2.42231e+06	6.20174e+06	2.91383e+06	3.03294e+06	5.66993e+06	5.58507e+06	5.6699e+06
M123T379	123.054	379.312	Nicotinamide	(M+H)+	HMDB0001406	C00153	Organoheterocyclic compounds	Pyridines and derivatives	Pyridinecarboxylic acids and derivatives	56712.2	59603.7	124354	65035.2	103308	248153	102818	220181	100438	834666	104084	600298	171712	140288	171240
M335T469	335.062	469.229	Nicotinamide ribotide	[M+H]+	HMDB0000229	C00455	Nucleosides, nucleotides, and analogues	Pyridine nucleotides	Nicotinamide nucleotides	20197.6	15114.7	30615.8	7891.77	19627.1	83469.7	21548.2	74821.4	23817.9	66109.1	12210.9	124255	59189.7	59179.7	57345.5
M124T329	124.038	328.606	Nicotinate	(M+H)+	HMDB0001488	C00253	Organoheterocyclic compounds	Pyridines and derivatives	Pyridinecarboxylic acids and derivatives	255828	224023	820546	290142	1.07291e+06	994525	366037	3357.33	272592	52591.2	354984	1293.83	115996	118322	116039
M336T473	336.046	473.136	Nicotinate d-ribonucleotide	[M+H]+	HMDB0001132	C01185	Nucleosides, nucleotides, and analogues	Pyridine nucleotides	Nicotinic acid nucleotides	19135.7	14076	42439.7	9126.92	23404.9	74528.7	15770.5	41869.6	20146.2	58851	10223	84746.1	56601.6	56638.5	52415.4
M665T453	665.101	453.407	Nicotinic acid adenine dinucleotide (NAAD)	[M+H]+	HMDB0001179	C00857	Nucleosides, nucleotides, and analogues	(5'->5')-dinucleotides		3.55773e+06	3.06893e+06	2.98628e+06	616073	2.68471e+06	3.93356e+06	2.98644e+06	6.57719e+06	6.80143e+06	7.23463e+06	3.05501e+06	7.76481e+06	6.161e+06	6.09677e+06	6.09689e+06
M163T238	163.052	237.906	Nicotinuric acid	(M+H-H2O)+	HMDB0003269	C05380	Organic acids and derivatives	Carboxylic acids and derivatives	"Amino acids, peptides, and analogues"	932.582	6398.11	3271.83	9793.69	3210.26	3694.72	7027.25	15922.1	19040.6	28308.5	5854.67	11914.3	15494.5	15865	15862.8
M530T417	530.205	417.199	Nilotinib	[M+H]+	HMDB0015595		Benzenoids	Benzene and substituted derivatives	Anilides	1376.51	1705.59	1936.28	466.7	1588.5	1384.28	1926.31	3633.16	3012.17	3487.06	2753.77	3382.46	3516.09	3516.85	3574.87
M112T419	112.098	419.13	Nipecotic acid	[M+H-H2O]+			Organoheterocyclic compounds	Piperidines	Piperidinecarboxylic acids and derivatives	1404.87	1441.31	944.48	902.016	1638.73	337.524	3605.33	650.035	1198.36	993.89	950.068	2147.79	2850.23	4137.75	2820.57
M125T217	125.071	217.162	Nitrosobenzene	(M+NH4)+						15079.8	12007.7	4132.79	9735.58	8878.46	13419.2	1946.88	3965.19	1318.05	3502.97	1208.97	2932.38	4032.83	4041.16	3706.02
M335T360_2	335.094	359.832	Nivalenol	[M+Na]+		C06080	Lipids and lipid-like molecules	Prenol lipids	Sesquiterpenoids	122576	120574	81260.7	52681.5	121107	124598	78928.3	133391	140404	115638	119625	241686	174459	173208	173202
M601T501	601.331	501.023	Nocardamine	[M+H]+						28965.7	23936.4	29133.7	5751.33	28533.2	33922.7	34790.1	83997.1	58351.3	72677.6	40906.1	101545	65521.4	63423.6	65610
M637T251	637.263	250.675	Norethindrone 2,3,4-tri-o-acetyl-.beta.-d-glucuronide methyl ester	[M+Na]+			Lipids and lipid-like molecules	Steroids and steroid derivatives	Steroidal glycosides	21263.3	22903.3	23177.9	3398.96	4158.85	19394.1	18628.5	24337.4	16745.7	27412.8	9764.71	4721.57	23841	23883.3	23681.4
M160T283	160.096	283.225	Normeperidine	[M+H-C3H6O2]+	HMDB0041958		Organoheterocyclic compounds	Piperidines	Phenylpiperidines	24967.7	25561	14821.1	1531	16449.7	14536.4	8201.02	1645.66	6910.39	840.824	6035.32	1398.94	3229.08	3707.18	3720.02
M264T229	264.179	229.11	Nortriptyline	[M+H]+	HMDB0014680	C07274	Benzenoids	Dibenzocycloheptenes		5958.22	9802.83	7268.02	606.475	8839.74	7010.52	9930.38	1305.86	112.995	397.015	3215.82	441.891	145.843	136.708	135.525
M130T497	130.049	497.16	O-acetyl-l-serine	[M+H-H2O]+	HMDB0003011	C00979	Organic acids and derivatives	Carboxylic acids and derivatives	Amino acids, peptides, and analogues	281250	104417	127520	74737.5	105948	118117	176240	261751	123181	277783	216823	233908	267592	242286	268199
M120T65	120.064	65.27	O-t-butyl-l-serine, methyl ester	[M+H-C4H8]+			Organic acids and derivatives	Carboxylic acids and derivatives	Amino acids, peptides, and analogues	132965	138229	111203	16375.1	133267	113873	103274	166293	174905	126872	134590	144906	163328	146956	146477
M91T302	91.0535	301.815	O-toluidine	[M+H-NH3]+	HMDB0041965	C14403	Benzenoids	Benzene and substituted derivatives	Toluenes	78426.5	87624.5	94277	162481	76613.1	104812	70266.6	114448	93505.2	124305	71346.2	132176	126079	123686	123694
M199T16	199.073	16.082	O,o,s-triethyl phosphorothioate	[M+H]+						4212.34	3463.62	3313.86	3907.91	3974.26	3893.33	4024.3	3385.7	3966.13	3954.41	4247.35	3960.2	4048.32	4047.7	4125.61
M142T227	142.122	227.339	Octanoic acid, 4-[(1-oxo-7-phenylheptyl)amino]-, (4r)-	[M+H-C13H18O2]+			Organic acids and derivatives	Carboxylic acids and derivatives	Amino acids, peptides, and analogues	36616	36543	20480.4	3615.24	24310.1	18740.6	21422.4	63339.8	24259.6	23919.4	15076.5	53706.2	13121.2	13149	11206.7
M288T203	288.216	202.816	Octanoylcarnitine	[M+H]+	HMDB0000791		Lipids and lipid-like molecules	Fatty Acyls	Fatty acid esters	24704.1	14526	16218.4	9344.71	13231.6	20667.8	22878	43036.8	27808.8	52334.2	36872.9	16798.2	40526.6	39278.9	39283.9
M391T41	391.339	41.191	Octyl-3,5-di-tert-butyl-4-hydroxyhydrocinnamate	[M+H]+			Lipids and lipid-like molecules	Fatty Acyls	Fatty alcohol esters	330005	300544	334359	188801	124119	315230	633735	338915	221761	181821	245012	107700	207587	207214	193818
M282T37	282.278	36.7515	Oleamide	[M+H]+	HMDB0002117	C19670	Lipids and lipid-like molecules	Fatty Acyls	Fatty amides	1.79241e+06	934432	941256	543540	353765	975402	1.42485e+06	1.02984e+06	497971	1.69274e+06	473703	576022	1.64171e+06	1.58181e+06	1.58186e+06
M426T170	426.356	169.552	Oleoyl-l-carnitine	[M+H]+	HMDB0005065		Lipids and lipid-like molecules	Fatty Acyls	Fatty acid esters	6.81577e+06	5.34159e+06	5.35499e+06	1.35214e+06	2.01683e+06	5.4672e+06	7.57799e+06	6.84076e+06	7.25056e+06	6.07625e+06	4.7863e+06	379519	5.23088e+06	5.26957e+06	5.23079e+06
M813T76	813.496	76.078	Oligomycin a	[M+Na]+		C11311				58914.6	58935.3	29008	54267.4	8040.79	24075.7	6903.12	10212	10836.1	8398.73	13744	10694.3	4042.59	4337.75	4359.64
M798T76	797.526	75.837	Oligomycin c	[M+Na]+		C11313				183653	195738	123837	50838.6	50418.4	85627.2	33825.8	44296.5	34598.1	39723.6	66509.5	59781.7	21969.7	23032.1	23059.6
M133T583	133.096	583.336	Ornithine	(M+H)+	HMDB0000214	C01602	Organic acids and derivatives	Carboxylic acids and derivatives	"Amino acids, peptides, and analogues"	16276.5	16676.6	17369.9	11608.5	18938	18254.1	24767.9	18547.5	14189.3	15959.2	17894.6	20445.1	25233.9	21615.9	21118.7
M478T501	478.158	500.994	Oxymorphone 3-.beta.-d-glucuronide	[M+H]+			Organic oxygen compounds	Organooxygen compounds	Carbohydrates and carbohydrate conjugates	1906.81	1830.56	1741.97	652.027	926.118	1150.17	1787.79	4730.92	1644.09	4495.85	1306.95	4398.35	3746.97	3881.13	3747.92
M309T86	309.137	85.6425	Paclitaxel	[M+H-C27H31O11N]+	HMDB0015360	C07394	Lipids and lipid-like molecules	Prenol lipids	Diterpenoids	27845.7	35311.3	42042.1	3460.27	13202.2	44790.8	5546.74	25644.9	17373	22514.4	8293.64	217769	30156.9	34741.2	30673.5
M256T36	256.262	36.401	Palmitamide	[M+H]+	HMDB0012273		Lipids and lipid-like molecules	Fatty Acyls	Fatty amides	363584	276460	344346	158078	145400	420099	363416	399690	208007	489591	135811	150907	487168	487041	481176
M704T180_1	703.573	179.611	Palmitoyl sphingomyelin	[M+H]+	HMDB0061712		Lipids and lipid-like molecules	Sphingolipids	Phosphosphingolipids	2.17259e+07	2.05562e+07	1.7852e+07	2.58409e+06	1.91929e+06	9.43134e+06	4.38814e+06	949188	2.88014e+06	892332	3.72513e+06	1.52197e+06	437751	438838	481138
M577T481	577.252	480.772	Pantethine	[M+Na]+	HMDB0003828	C12661	Organic acids and derivatives	Carboxylic acids and derivatives	Amino acids, peptides, and analogues	965.719	1924.06	2423.86	1472.15	962.049	3603.74	6166.07	4086.38	4198.46	6656.99	4123.93	5567.74	2452.26	2289.27	2422.51
M220T281_1	220.118	281.097	Pantothenic acid	[M+H]+	HMDB0000210	C00864	Organic acids and derivatives	Carboxylic acids and derivatives	Amino acids, peptides, and analogues	3.89418e+06	3.7095e+06	3.84161e+06	421940	3.87853e+06	3.94613e+06	3.79917e+06	627399	3.92814e+06	985319	3.70578e+06	619011	2.3151e+06	2.35395e+06	2.34089e+06
M436T71	436.252	71.46	Paxilline	[M+H]+	HMDB0030323	C13782				61250.6	43489.3	13037.4	84493.5	65425.8	18314.3	45628.9	55427.3	17048.3	43172.8	14325	28547.9	37234.2	44429.5	21463.6
M757T142	756.551	141.866	PC(16:0/16:0)	(M+Na)+	HMDB0000564/HMDB0007878/HMDB0007879/HMDB0007880/HMDB0007882/HMDB0007884/HMDB0007886/HMDB0007887/HMDB0007897/HMDB0007898/HMDB0007911/HMDB0007912/HMDB0007913/HMDB0007914/HMDB0007936/HMDB0007937/HMDB0007938/HMDB0007939/HMDB0007940/HMDB0007958/HMDB0007959/HMDB0007960/HMDB0007961/HMDB0007964/HMDB0007966/HMDB0007967/HMDB0007981/HMDB0007982/HMDB0007983/HMDB0007984/HMDB0007985/HMDB0008002/HMDB0008003/HMD…	C00157	Lipids and lipid-like molecules	Glycerophospholipids	Glycerophosphocholines	3.98423e+06	3.9574e+06	4.3137e+06	2.22258e+06	1.86623e+06	5.19048e+06	4.43523e+06	1.71682e+06	4.6412e+06	1.3547e+06	2.75017e+06	1.85789e+06	1.02601e+06	1.07877e+06	1.07819e+06
M790T498	790.331	498.442	Pentagastrin	[M+Na]+			Organic acids and derivatives	Peptidomimetics	Hybrid peptides	1854.3	2624.08	791.513	398.422	1350.25	1200.85	418.134	2082.94	3023.29	2342.08	1759.27	1899.69	2654.39	2848.78	2658.5
M369T531	369.249	530.983	Perindopril	[M+H]+	HMDB0014928	C07706	Organic acids and derivatives	Carboxylic acids and derivatives	Amino acids, peptides, and analogues	310949	295943	307727	83141.9	255478	320053	244094	609899	367955	553532	260063	859338	548629	548624	551445
M237T214	237.123	214.409	Phe-Ala	[M+H]+			Organic acids and derivatives	Carboxylic acids and derivatives	Amino acids, peptides, and analogues	4702.39	3771.4	1527.31	1656.44	3208.9	3977.62	2632.74	641.643	2696.95	394.329	1290.24	202.932	460.54	510.929	458.163
M223T238_2	223.106	238.001	Phe-gly	[M+H]+		C18481	Organic acids and derivatives	Carboxylic acids and derivatives	Amino acids, peptides, and analogues	12198	6631.5	9438.94	11634.7	10269.2	6315.1	11930.7	18773	11961.4	19158	7048.64	17971.6	18076.6	19080.2	19080.5
M339T256	339.191	255.809	Phe-Ile	(M+CH3COO+2H)+						6872.45	13475.6	3167.64	406.784	10367	6414.99	4876.13	18437.1	12567.6	9571.04	6503.68	42242.6	8716.02	8697.82	8336.52
M313T35_2	313.16	35.475	Phe-Phe	(M+H)+						18637.7	43249.3	9187.66	3694.06	32513.4	9186.53	35348.6	16181.1	70005.8	20614.9	27065.1	13338.8	13474.9	8174.89	14363.9
M267T39_1	267.122	38.735	Phe-thr	[M+H]+			Organic acids and derivatives	Carboxylic acids and derivatives	Amino acids, peptides, and analogues	38721.5	33838.2	41547.4	32199.7	117664	30837.7	100156	54966.4	100747	51109.2	100742	108807	50385.4	48128.7	47989.1
M215T22	215.069	21.861	Phenyl salicylate	[M+H]+	HMDB0032018	C14163				12024.5	12486.8	11863.5	13060	13419	12722	15455.7	13019.2	14977.2	12860.6	14757	14776.8	13044.2	13043.7	12874.4
M103T258	103.053	258.308	Phenylacetaldehyde	[M+H-H2O]+	HMDB0006236	C00601	Benzenoids	Benzene and substituted derivatives	Phenylacetaldehydes	1.0401e+06	967581	1.0856e+06	86287.4	787351	1.18839e+06	756496	1.82531e+06	882214	1.78958e+06	705280	2.37969e+06	1.88198e+06	1.86992e+06	1.86991e+06
M119T329	119.048	329.266	Phenylacetic acid	(M+H-H2O)+						20784.9	53542.8	56173	3616.08	16781.9	1173.21	18951.6	37594.3	1797.72	14744.3	52874.8	28279.9	8496.56	22962.7	17683.1
M150T248	150.076	248.355	Phenylephrine	[M+H-H2O]+	HMDB0002182	C07441	Benzenoids	Phenols	1-hydroxy-4-unsubstituted benzenoids	15821.9	36427.9	34556.5	15716.2	11709.2	73767	24565.7	127821	78806.5	122782	43183.6	195267	134543	134544	133272
M256T208	256.159	208.153	Phenyltoloxamine	[M+H]+	HMDB0240250		Benzenoids	Benzene and substituted derivatives	Diphenylmethanes	28663.2	32244.9	9129.79	13057.6	10747.1	19510.3	17252.5	11962.4	23649.2	7202.51	7321.51	1495.32	4012.89	4268.14	4270.53
M184T477	184.073	476.945	Phosphocholine	[M+H]+	HMDB0001565	C00588	Organic nitrogen compounds	Organonitrogen compounds	Quaternary ammonium salts	2.26329e+07	1.65456e+07	1.30188e+07	916225	9.25774e+06	1.1124e+07	5.0792e+06	1.37238e+07	4.62167e+06	4.09741e+06	3.16156e+06	1.09724e+07	1.6758e+07	1.68804e+07	1.68808e+07
M261T34	261.148	34.1745	Phthalic acid Mono-2-ethylhexyl Ester	(M+H-H2O)+						3.31808e+06	2.7396e+06	3.22415e+06	924618	1.11971e+06	3.20131e+06	2.55169e+06	2.88501e+06	1.51349e+06	2.7578e+06	1.20914e+06	1.60281e+06	3.20794e+06	3.20053e+06	3.20051e+06
M149T34_2	149.023	34.172	Phthalic anhydride	[M+H]+			Organoheterocyclic compounds	Benzofurans	Benzofuranones	1.28909e+07	1.15525e+07	1.28749e+07	4.87071e+06	6.9482e+06	1.42651e+07	1.12267e+07	1.28362e+07	7.28682e+06	1.14003e+07	5.94148e+06	7.8187e+06	1.35338e+07	1.33214e+07	1.33208e+07
M687T375	687.375	374.647	Phytolaccasaponin G	[M+Na]+	HMDB0034636		Lipids and lipid-like molecules	Prenol lipids	Triterpenoids	3547.44	1151.16	2153.93	1225.43	1363.97	2627.36	2554.66	6664.67	2522.22	3208.74	1370.83	5242.23	3991.07	3730.07	3716.27
M495T415	495.127	415.412	Picroside ii	[M+H-H2O]+			Phenylpropanoids and polyketides	Tannins	Hydrolyzable tannins	2498.22	1899.53	2894.74	381.41	1929.2	2511.64	2187.74	2455.62	2050.09	2175.07	2161.33	2686.01	2279.89	2275.97	2018.21
M315T449_1	315.059	448.702	Picrotoxinin	[M+Na]+	HMDB0002322	C09529				2456.34	2153.55	2120.33	1167.68	1853.81	3315.64	3429.72	4231.82	2999.71	2691.31	1589.7	1929.04	3274.14	2861.45	4062.96
M245T350	245.047	349.853	Pidotimod	[M+H]+			Organic acids and derivatives	Carboxylic acids and derivatives	Amino acids, peptides, and analogues	119032	81454.1	111971	106.646	78419	134910	61172.9	120072	94981.4	127585	57800.6	133079	142087	142103	146690
M271T265	271.094	264.531	Pinostrobin	[M+H]+		C16419	Phenylpropanoids and polyketides	Flavonoids	O-methylated flavonoids	12682.7	28716.7	16593.8	3651.97	8817.25	18197.2	10511.6	23804.4	9959.9	12651.7	5383.08	5257.54	7748.9	7617.73	6962.05
M442T398	442.176	398.344	Platensimycin	[M+H]+		C20132	Benzenoids	Benzene and substituted derivatives	Benzoic acids and derivatives	4458.36	5095.98	4708.17	715.871	4545.56	5852.11	3428.65	6310.63	7524.17	15686	5582.05	16007.9	8184.78	8204.34	8573.82
M119T38	119.084	37.612	Polygodial	[M+H-C6H12O2]+		C09712				343294	353070	519011	187465	506579	518220	509521	590183	536756	569378	437131	730287	601345	601340	596149
M272T460	272.17	459.623	Pro-Arg	(M+H)+						35395.5	71726.9	21304.8	10079.4	31369.4	38524.5	32120.3	65086.4	75539.4	89129.8	80901.7	72177.1	68138.5	65332.9	65465.6
M231T437	231.097	437.483	Pro-Asp	[M+H]+			Organic acids and derivatives	Carboxylic acids and derivatives	Amino acids, peptides, and analogues	209172	174653	190935	38131.7	162451	245151	197244	401005	290538	413529	213820	550750	378832	375800	375798
M194T381	194.117	380.593	Pro-Asp-Arg	[M+2H]2+			Organic acids and derivatives	Carboxylic acids and derivatives	Amino acids, peptides, and analogues	32115.1	40407	33169.5	43349.3	26365.1	33354.6	31685.8	30629.4	34618.6	31494.5	35508.6	25143.5	30633.1	30647.9	30623
M244T380	244.128	379.814	Pro-gln	[M+H]+			Organic acids and derivatives	Carboxylic acids and derivatives	Amino acids, peptides, and analogues	40283.7	37724.5	39836.1	11239	38820.6	52292.6	54171.6	81753.3	72115.4	77190.7	53110.8	90604.2	68598.9	68596	70544.8
M245T427_2	245.113	427.487	Pro-Glu	[M+H]+			Organic acids and derivatives	Carboxylic acids and derivatives	Amino acids, peptides, and analogues	606342	434411	562740	60544.1	489849	667253	767861	1.35134e+06	1.09774e+06	1.5351e+06	1.06952e+06	1.76449e+06	1.16709e+06	1.15377e+06	1.1673e+06
M270T404	270.143	404.2	Pro-Gly-Pro	[M+H]+			Organic acids and derivatives	Carboxylic acids and derivatives	Amino acids, peptides, and analogues	7108.19	8673.66	8798.49	2822.55	6878.88	10050.5	9707.03	17246.5	16699.3	17952.7	9124.3	23096	14828.5	14813.6	15743.6
M229T430	229.118	430.306	Pro-hyp	[M+H]+	HMDB0006695		Organic acids and derivatives	Carboxylic acids and derivatives	Amino acids, peptides, and analogues	253978	239237	260954	37747.9	264843	339986	291235	853592	456215	674151	355260	823135	607221	605845	633517
M179T524	179.128	524.144	Pro-Ile-Lys	[M+2H]2+			Organic acids and derivatives	Carboxylic acids and derivatives	Amino acids, peptides, and analogues	41438.8	45066.7	30537.5	9813.66	40514.7	45704.6	25378.3	76520	47620.2	68225.3	36106.2	102577	70680.4	70667.3	72443
M229T373	229.154	372.731	Pro-leu	[M+H]+			Organic acids and derivatives	Carboxylic acids and derivatives	Amino acids, peptides, and analogues	194132	187332	178786	33383.6	231235	234006	206739	474752	334648	503287	258259	768143	417431	411049	417457
M247T440	247.092	439.801	Pro-met	[M+H]+			Organic acids and derivatives	Carboxylic acids and derivatives	Amino acids, peptides, and analogues	17179.1	5220.88	9892.94	10738	10648.8	4967.52	13000.1	11480.7	17045.4	24249.4	9788.1	56168.7	16442.6	16461.7	13986.6
M263T429	263.123	428.855	Pro-phe	[M+H]+			Organic acids and derivatives	Carboxylic acids and derivatives	Amino acids, peptides, and analogues	4667.38	2338.15	3149.76	3546.04	5537.36	4870.57	4195.03	6506.31	4463.69	3889.05	3719.22	4587.3	3578.53	3914.77	3391.97
M213T424	213.122	424.346	Pro-pro	[M+H]+			Organic acids and derivatives	Carboxylic acids and derivatives	Amino acids, peptides, and analogues	106712	96853.3	82342.4	23774	88059.5	114622	103993	190495	167493	192911	109260	208905	178718	176995	178618
M203T372	203.102	371.638	Pro-ser	[M+H]+			Organic acids and derivatives	Carboxylic acids and derivatives	Amino acids, peptides, and analogues	11246.1	9500.61	11681.2	5201.71	9600	12813.7	13125.2	18854.1	18377.1	17172.2	12789.4	20440.7	15354.2	16237.6	15804.9
M217T371	217.128	371.411	Pro-thr	[M+H]+			Organic acids and derivatives	Carboxylic acids and derivatives	Amino acids, peptides, and analogues	16207	17658.6	18323.6	2202.3	16048.7	17392.4	28084.6	47137.4	34488.5	42242.7	27666.8	52336.2	31055.5	31029.1	31243.4
M302T60	302.304	60.0955	Pro-Trp	[M+H]+	HMDB0000269	C00836	Organic nitrogen compounds	Organonitrogen compounds	Amines	970764	891920	1.13521e+06	340977	118766	954477	821233	748535	318532	637080	570701	34632.8	1.27887e+06	1.2966e+06	1.29671e+06
M458T420	458.233	420.021	Pro-Trp-Arg	[M+H]+			Organic acids and derivatives	Carboxylic acids and derivatives	Amino acids, peptides, and analogues	30347.1	26700.6	31930.6	3485.9	23922.1	32868.8	25321.4	59132.4	52927.5	68033.2	29921	73343.1	55650.6	54942.5	54959.7
M204T82	204.104	81.746	Pro-Tyr-Lys	[M+2H]2+			Organic acids and derivatives	Carboxylic acids and derivatives	Amino acids, peptides, and analogues	2524.29	3349.27	3639.87	3689.63	3140.44	12317.2	2238.16	347050	3063.71	423646	2778.86	116425	286699	276807	286747
M215T299	215.138	299.495	Pro-Val	(M+H)+						6351.21	6843.16	5479.89	3298.82	9200.25	7487.4	11095.3	14031	9229.59	6333.08	7190.05	6678.15	8903.17	9286.9	9286.08
M186T331	186.105	330.944	Pro-Val-Arg	[M+2H]2+			Organic acids and derivatives	Carboxylic acids and derivatives	Amino acids, peptides, and analogues	5569.33	6092.22	3990.32	5700.8	1264.44	4315.02	4169.02	2671.4	5708.42	740.433	3005.55	2634.27	396.863	804.592	396.13
M503T563	503.316	562.55	Propanoic acid, 2-[[4-[2-[[(cyclohexylamino)carbonyl](4-cyclohexylbutyl)amino]ethyl]phenyl]thio]-2-methyl-	[M+H]+		C15622	Organosulfur compounds	Thioethers	Aryl thioethers	3787.25	3002.55	2199.1	1498.02	2607.65	2970.65	3558.13	6736.85	4658.46	2994.36	2447.02	9306.28	5787.28	7692.53	6075.48
M531T433_2	531.283	432.841	Proscillaridin a	[M+H]+		C12816	Lipids and lipid-like molecules	Steroids and steroid derivatives	Steroid lactones	1663.2	1603.07	2168.17	744.774	2548.92	4380.95	2853.06	9731.11	6411.28	3795.52	5070.61	3142.92	6775.71	6400.83	6772.27
M484T206	484.311	205.601	Psychosine	[M+Na]+	HMDB0000648	C01747	Lipids and lipid-like molecules	Sphingolipids	Glycosphingolipids	4578.79	2196.79	1320.88	452.433	1372.26	1707.35	1529.98	3577.15	1152.74	2011.28	737.593	2207.73	2100.68	2133.95	2100.67
M425T421	425.107	420.618	Pteryxin	[M+K]+		C09307	Phenylpropanoids and polyketides	Coumarins and derivatives	Pyranocoumarins	1600.91	2188.8	1795.89	341.325	1304.65	1980.16	1063.5	1734.66	779.168	2276.14	1099.59	2797.57	2266.72	2253.28	2473.5
M543T436	543.284	435.656	Puberanidine	[M+H]+			Lipids and lipid-like molecules	Prenol lipids	Diterpenoids	2400	1876.97	2234.91	313.987	1125.76	2350.58	2676.27	5593.29	2088.89	5328.72	1359.47	6352.9	3505.38	3482.75	4123.98
M168T122	168.065	122.32	Pyridoxal (Vitamin B6)	(M+H)+	HMDB0001545	C00250	Organoheterocyclic compounds	Pyridines and derivatives	Pyridine carboxaldehydes	115482	90965.2	112037	23713.2	157221	202485	63848.5	550330	362239	616352	194610	1.06655e+06	534359	529844	529896
M169T295	169.096	294.542	Pyridoxamine (PM)	(M+H)+	HMDB0001431	C00534	Organoheterocyclic compounds	Pyridines and derivatives	Pyridoxamines	10450.1	10677.5	12164.5	2060.33	11017.2	6886.63	2705.13	5936.37	11303.7	7339.49	14690.3	13114.7	8218.76	8222.56	7444.67
M170T102	170.081	101.827	Pyridoxine	[M+H]+	HMDB0000239	C00314	Organoheterocyclic compounds	Pyridines and derivatives	Pyridoxines	7.09441e+06	7.02016e+06	8.07549e+06	640696	6.38101e+06	9.32067e+06	4.00445e+06	1.62772e+07	5.70729e+06	1.6607e+07	6.8028e+06	2.96793e+07	3.46757e+06	3.46718e+06	3.25549e+06
M245T463	245.056	462.606	Pyroglu-Asp	[M+H]+			Organic acids and derivatives	Carboxylic acids and derivatives	Amino acids, peptides, and analogues	11598.9	11573.9	7570.11	4795.34	15956.8	11696.3	19632.9	16010.5	16482.6	16044.8	15190.7	16518.8	14131.1	13732.7	13735.2
M233T406_1	233.076	406.062	Pyroglu-Cys	[M+H]+			Organic acids and derivatives	Carboxylic acids and derivatives	Amino acids, peptides, and analogues	27625.3	18317.6	19921.5	4978.01	19327.5	21129.7	24394.7	33700.7	32654.9	32888.8	24973.1	37981.9	32074	31234.1	31235.5
M389T424	389.175	424.346	Pyroglu-Cys-Arg	[M+H]+			Organic acids and derivatives	Carboxylic acids and derivatives	Amino acids, peptides, and analogues	20771.8	14421.9	19390.4	1865.78	10483.9	17180.3	15344.8	40363.8	31991.4	37997.3	18006.2	54568.6	28466.5	29751	29759.2
M361T431	361.172	430.624	Pyroglu-Cys-Lys	[M+H]+			Organic acids and derivatives	Carboxylic acids and derivatives	Amino acids, peptides, and analogues	31545.9	21728.3	30379.7	1159.58	37756	27406.8	61862.2	69331.1	39362.8	49918.1	42745	54366.5	43992	45794.2	43980.5
M277T191	277.099	190.683	Pyroglu-phe	[M+H]+			Organic acids and derivatives	Carboxylic acids and derivatives	Amino acids, peptides, and analogues	18089.2	18289.5	19522.7	7728.24	10105.5	13527.5	6623.22	14351.6	6568.82	16604.1	10379.2	7242.97	9736.75	6733.67	9707.72
M72T530	72.0804	530.313	Pyrrolidine	[M+H]+	HMDB0031641		Organoheterocyclic compounds	Pyrrolidines		319972	473619	476522	272051	291852	304993	340955	516808	538236	529339	543305	619156	565930	496303	559527
M461T463	461.196	462.608	Quinapril	[M+Na]+	HMDB0015019	C07398	Organic acids and derivatives	Carboxylic acids and derivatives	Amino acids, peptides, and analogues	4908.75	3352.36	3621.25	829.896	2786.34	5116.87	3734.78	9457.28	5032.93	8117.5	3235.47	19558.4	10218.4	10246	10738.5
M314T154	314.305	153.736	R-palmitoyl-(2-methyl) ethanolamide	[M+H]+			Lipids and lipid-like molecules	Fatty Acyls	Fatty amides	8320.23	6625.84	9764.52	11399.9	8955.91	9007.11	10161	7548.87	7895.76	8897.33	8797.54	4448.7	7969.32	7536.38	7973.36
M474T473	474.184	473.207	Raloxifene	[M+H]+	HMDB0014624	C07228	Organic oxygen compounds	Organooxygen compounds	Carbonyl compounds	3807.01	1060.22	1779.42	1639.12	2746.98	3972.17	2108.17	5284.91	5524.63	6729.08	3016.46	7361.61	5719.16	5249.49	5441.33
M735T301	735.313	300.837	Retrorsine n-oxide	[2M+H]+		C10333				1196.87	3331.34	3366.87	1028.15	6169.58	8372.74	4976.39	5806.86	7593.97	6993.93	4457.91	3343.37	7110.67	6989.8	6997.57
M377T216	377.144	215.857	Riboflavin	[M+H]+	HMDB0000244	C00255	Organoheterocyclic compounds	Pteridines and derivatives	Alloxazines and isoalloxazines	10001.1	10068.6	10337.8	4318.68	1977.72	5548.21	4356.34	7313.54	11044.3	13961	8796.47	14118.9	14510.1	14514.9	15098.2
M361T409_2	361.181	408.677	Ritonavir	[M+2H]2+	HMDB0014646	C07240	Organic acids and derivatives	Carboxylic acids and derivatives	Amino acids, peptides, and analogues	257668	181079	184106	29175.3	151435	193140	205906	379951	270915	372406	236825	465881	327343	321424	327396
M272T37	272.106	36.736	Roseoflavin	[M+H-C5H10O4]+		C21647	Organoheterocyclic compounds	Pteridines and derivatives	Alloxazines and isoalloxazines	75984.5	82663	106786	13094.7	78515.4	104102	75672.2	146297	93133.7	149018	79751.5	190648	151234	157923	151150
M517T302	517.169	301.591	Rottlerin	[M+H]+		C10721	Phenylpropanoids and polyketides	Diarylheptanoids	Linear diarylheptanoids	5403.72	5389.07	4924.7	3564.65	5056.46	5519	3011.38	3167.9	3397.19	4232.51	1947.17	5541.4	6094.86	5818.41	5820.11
M408T83	408.255	82.643	RU-0211	(M+NH4)+						17918.1	3028.82	26731.5	5843.79	16878.8	15715.6	26019.9	25558.8	30380.4	44259.2	20745.2	15308.5	17043.5	18520.4	17068.3
M176T152	176.071	152.377	S-(2-boronoethyl)-l-cysteine	[M+H-H2O]+			Organic acids and derivatives	Carboxylic acids and derivatives	Amino acids, peptides, and analogues	22343.6	29117.6	21615.3	3053.01	15040.6	44335	15273.2	97277.4	34534.8	84399.8	17992	241800	112173	109676	109676
M385T397	385.127	396.969	S-adenosyl-l-homocysteine	[M+H]+	HMDB0000939	C00021	Nucleosides, nucleotides, and analogues	5'-deoxyribonucleosides	5'-deoxy-5'-thionucleosides	44260.1	38908.5	90838	18115.5	45888.7	47608.3	34374.8	45224	49486.9	156282	120067	167781	53568	53184.5	57095.2
M399T468	399.143	467.879	S-adenosyl-l-methionine	[M+H]+	HMDB0001185	C00019	Nucleosides, nucleotides, and analogues	5'-deoxyribonucleosides	5'-deoxy-5'-thionucleosides	321994	244172	217668	220541	250198	285685	207317	434194	391175	435281	248311	482452	437452	437746	427147
M399T514	399.144	514.456	S-Adenosylmethionine	[M+H]+	HMDB0001185	C00019	Nucleosides, nucleotides, and analogues	5'-deoxyribonucleosides	5'-deoxy-5'-thionucleosides	1.3844e+06	756945	501346	468517	1.95512e+06	1.28963e+06	1.65366e+06	1.04679e+06	1.4464e+06	891727	1.80793e+06	1.83153e+06	1.1664e+06	1.09867e+06	1.16634e+06
M249T95	249.053	95.266	S-ethyl-n-[4-(trifluoromethyl)phenyl]isothiourea	[M+H]+			Benzenoids	Benzene and substituted derivatives	Trifluoromethylbenzenes	12327.4	34827.7	6983	2718.1	5415.79	39590.7	4272.13	89626.1	18073.4	10329.8	14119.6	9544.14	6307.22	2645.99	6340.82
M298T92	298.097	92.4685	S-methyl-5'-thioadenosine	[M+H]+	HMDB0001173	C00170	Nucleosides, nucleotides, and analogues	5'-deoxyribonucleosides	5'-deoxy-5'-thionucleosides	3.06513e+07	2.96233e+07	2.80803e+07	3.60068e+06	1.74059e+07	3.46698e+07	1.12361e+07	1.60424e+07	1.56837e+07	2.17268e+07	1.74739e+07	2.07743e+07	1.56607e+07	1.57154e+07	1.20151e+07
M803T231	803.453	230.961	Saikosaponin a	[M+Na]+		C08975	Lipids and lipid-like molecules	Prenol lipids	Terpene glycosides	6391.81	3281.26	3297.59	210.472	932.401	705.056	1589.06	4152.74	75.2849	1869.41	1430.5	1168.76	2161.85	2117.94	2335.98
M781T231	781.473	231.161	Saikosaponin d	[M+H]+			Lipids and lipid-like molecules	Prenol lipids	Terpene glycosides	56201	34296.1	38321.2	2306.67	6257.65	10137.5	13617.5	35169.8	9272.11	29460.1	9570.59	6722.05	33417.2	33368.5	29739.7
M619T466	619.266	465.951	Salannin	[M+Na]+		C08780	Lipids and lipid-like molecules	Prenol lipids	Triterpenoids	1553.04	2475.09	745.129	646.479	2419.7	3235.05	4422.98	9155.52	4296.79	2598.53	2625.44	4821.45	4887.03	5700.34	4851.75
M577T265	577.162	264.515	Saponarin	[M+H-H2O]+		C08064	Phenylpropanoids and polyketides	Flavonoids	Flavonoid glycosides	20579.2	19041.4	17097.4	49.2072	10081.5	17650.7	12592.4	21368.7	13693.2	24618.5	10879.1	15555.2	25681.3	24423.3	25717.1
M542T412	542.206	411.908	Saracatinib	[M+H]+			Organoheterocyclic compounds	Diazanaphthalenes	Benzodiazines	3791.67	5393.95	4622.76	933.211	3488.96	5950.31	3267.64	7103.69	6391.12	7595.1	5227.64	7795.8	5662.45	5622.35	6170.87
M244T153	244.155	152.557	Sebacic acid	(M+CH3CN+H)+	HMDB0000792	C08277	Lipids and lipid-like molecules	Fatty Acyls	Fatty acids and conjugates	46391.7	31434.5	30112.4	8425.02	33710.9	26268.8	5895.83	36000.5	5320.72	22048.1	2404.79	23517.2	18828.8	8898.25	18833.5
M362T107_2	362.252	106.928	Ser-Lys-Lys	[M+H]+			Organic acids and derivatives	Carboxylic acids and derivatives	Amino acids, peptides, and analogues	28877	56839.3	10131.2	2950.88	22299.3	30654.6	31094	70639.1	68307.7	59887.5	22117.7	50625.4	54983.3	54991.8	54420.5
M207T234	207.112	233.891	Ser-Thr	[M+H]+			Organic acids and derivatives	Carboxylic acids and derivatives	Amino acids, peptides, and analogues	317842	163587	186835	20099.6	106311	7581.93	157458	250791	7250.63	216212	97597.1	239824	208497	208974	209364
M137T296_2	137.07	295.975	Siduron	[M+H-C7H12]+		C18435	Benzenoids	Benzene and substituted derivatives	N-phenylureas	6.399e+06	7.74342e+06	5.72413e+06	1.46102e+06	6.38653e+06	4.20088e+06	9.64775e+06	1.62197e+07	1.18548e+07	1.35387e+07	1.02171e+07	1.86836e+07	1.12677e+07	1.10307e+07	1.11759e+07
M475T465	475.212	464.843	Sildenafil	[M+H]+	HMDB0005039	C07259	Benzenoids	Benzene and substituted derivatives	Benzenesulfonamides	4761.39	2553.85	3110.07	778.954	2734.65	5647.84	2305.76	8958.01	6032.37	11100.4	4546.05	15688.7	10244.8	10137	10075.3
M155T37	155.069	37.142	sn-Glycerol 1-phosphate	(M+H-H2O)+		C00623				3674.22	2392.19	1744.2	8723.53	7354.48	5362.66	63281.7	5652.45	15079.6	4642.86	33262.5	11694	14648.3	6545.87	8682.58
M238T398	238.044	397.659	Sn-glycerol-3-phosphoethanolamine	[M+Na]+		C01233	Lipids and lipid-like molecules	Glycerophospholipids	Glycerophosphoethanolamines	188487	171694	176749	29646.1	162506	236377	191159	481412	267880	360656	184456	535137	374429	372145	372163
M414T198	414.32	197.809	Solasodine	[M+H]+	HMDB0035282	C10822	Lipids and lipid-like molecules	Steroids and steroid derivatives	Steroidal alkaloids	15549.1	7862.33	8902.64	3226.26	6632.04	7300.69	14708.6	21163.1	17402.2	19596.8	19509.6	8279.51	18118.4	17619.6	18115.7
M944T204	943.52	203.85	Soyasaponin bb	[M+H]+		C08983	Lipids and lipid-like molecules	Prenol lipids	Terpene glycosides	955.938	814.454	900.265	533.723	195.22	434.739	61.6059	17.3202	208.144	19.0056	175.965	19.4198	36.1608	44.0369	36.9102
M795T34	794.628	34.161	Sphingomyelin (d18:1/18:0)	(M+CH3CN+Na)+	HMDB0001348/HMDB0010168/HMDB0010169/HMDB0011698/HMDB0011699/HMDB0012084/HMDB0012085/HMDB0012087/HMDB0012088/HMDB0012089/HMDB0012090/HMDB0012091/HMDB0012092/HMDB0012093/HMDB0012094/HMDB0012095/HMDB0012096/HMDB0012100/HMDB0012101/HMDB0012102/HMDB0012103/HMDB0012104/HMDB0012105/HMDB0012107/HMDB0013461/HMDB0013462/HMDB0013463/HMDB0013464/HMDB0013465/HMDB0013466/HMDB0013467/HMDB0013468/HMDB0013469	C00550	Lipids and lipid-like molecules	Sphingolipids	Phosphosphingolipids	12441.1	755195	10680.2	4903.11	4740.82	766964	7983.76	252053	4840.43	326713	2916.96	557551	298929	289930	298737
M300T137	300.288	136.851	Sphingosine	(M+H)+	HMDB0000252	C00319	Organic nitrogen compounds	Organonitrogen compounds	Amines	23404.6	24365.1	31123.7	8148.46	14435.8	31594	38414.4	84150.2	48017.8	77427.8	19263.2	35417.8	63529.2	66839.6	63523.7
M144T362	144.101	361.549	Stachydrine	[M+H]+	HMDB0004827	C10172	Organic acids and derivatives	Carboxylic acids and derivatives	Amino acids, peptides, and analogues	166136	149307	165538	50061.4	150269	174638	156670	195826	191099	213086	149144	201818	207178	206840	207178
M284T35_2	284.293	35.447	Stearamide	[M+H]+	HMDB0034146	C13846	Organic acids and derivatives	Carboximidic acids and derivatives	Carboximidic acids	206820	161511	183882	87003.8	55324.4	206659	180597	130992	62905.5	143296	57806.8	74714.4	158110	164033	158116
M582T331	582.262	331.46	Streptomycin a	[M+H]+	HMDB0015214	C00413	Organic oxygen compounds	Organooxygen compounds	Carbohydrates and carbohydrate conjugates	676.609	975.18	1344.73	711.971	1827.49	891.4	946.728	64.2422	1104.71	434.428	661.913	153.161	399.345	224.042	226.452
M323T37_3	323.22	37.3195	Strophantidin	[M+H-CH6O4]+		C19988	Lipids and lipid-like molecules	Steroids and steroid derivatives	Steroid lactones	14793	21414.4	5361.33	87923.6	21704.5	20016.2	34445.6	33935.3	51073.5	14596	13739.5	12441.9	8881.4	8705.44	11368.7
M149T153	149.07	152.645	Stylopine	[M+H-C10H9O2N]+		C05175				7747.49	7316.83	8541.65	2584.41	6205.07	7216.65	16764.4	16633	9344.73	25989.2	9382.62	26242	25235.6	24593.4	25266.8
M233T296	233.063	295.975	Sulfanilamide	(M+CH3COO+2H)+	HMDB0014404	C07458	Benzenoids	Benzene and substituted derivatives	Benzenesulfonamides	47908.5	30186.3	28843.1	16006.5	15957.5	10327.1	5691.31	17388	11782.6	33969.2	16339.4	34499.7	15856.1	16760.1	16751
M336T360	336.064	359.555	Sulfanitran	[M+H]+			Benzenoids	Benzene and substituted derivatives	Sulfanilides	1110.63	2140.43	2352.52	4061.06	7734.08	6709.41	2207.47	7709.43	4175.56	8303.47	8518.43	12040.1	8269.39	7628.37	7642.21
M822T223	821.508	223.079	Tacrolimus	[M+NH4]+	HMDB0015002	C01375				3995.9	3464.35	2076.57	194.966	1408.96	1829.04	1610.14	2365.35	1408.48	786.065	3212.54	2368.79	1074.8	1194.17	1188.11
M372T119	372.243	119.446	Tamoxifen	[M+H]+	HMDB0014813	C07108	Phenylpropanoids and polyketides	Stilbenes		5451.17	6670.03	2994.19	1052.26	12455.9	5497.3	9202.84	10571.5	4709.27	5120.42	2416.72	8345.82	5062.41	4639.87	4641.91
M482T398	482.27	397.708	Tauroursodeoxycholic acid	[M+H-H2O]+	HMDB0000874	C16868	Lipids and lipid-like molecules	Steroids and steroid derivatives	Bile acids, alcohols and derivatives	945.277	1966.5	1548.11	453.184	1020.64	2642.37	1865.09	3400.26	3317.25	7283.9	2817.32	5527.07	4859.46	4862.77	4635.67
M226T34	226.157	34.188	Terbumeton	[M+H]+		C18768	Organoheterocyclic compounds	Triazines	Aminotriazines	24262.4	27533.2	11876	12110.4	45000.6	656190	58383.1	58292.3	49990.8	118468	27094.6	33240.1	67458	61261.6	61090.5
M585T41	585.372	41.235	Terragine e	[M+H]+						30373.1	34494.6	23808.1	5003.68	3567.9	24682.1	35441.9	43112.3	51732	27057.6	29919.4	117927	18533.7	18379.7	18428.7
M71T34	71.0847	34.122	Tert-amyl alcohol	[M+H-H2O]+	HMDB0033772	C21401	Organic oxygen compounds	Organooxygen compounds	Alcohols and polyols	140722	135560	112620	35431.1	40081.5	158705	115349	103183	34169.7	108292	53185.4	60733.1	131186	133767	131257
M413T44	413.321	44.159	Testosterone cypionate	[M+H]+		C08156	Lipids and lipid-like molecules	Steroids and steroid derivatives	Steroid esters	101906	98285.1	76617.6	145324	66979.4	102276	253509	78483.8	108648	54219.2	98285	134822	75720.9	83922.6	75412.8
M318T460_2	318.2	460.057	Tetrabenazine	[M+H]+	HMDB0015592	C11168				5189.27	4860.17	4431.61	955.715	3980.11	6574.7	5788.96	13236.4	7121.4	11795	5687.99	17034.3	10683.3	10262.1	10252.5
M263T76	263.043	75.514	Tetraethyl pyrophosphate	[M+H-C2H4]+		C19017	Organic oxygen compounds	Organic oxoanionic compounds	Organic pyrophosphates	609.863	831.514	991.175	3028.89	1266.68	1188.82	587.3	2133.23	409.906	6048.22	2271.14	6126.09	3340.3	3071.65	3065.94
M195T36	195.121	36.107	Tetraethylene glycol	[M+H]+	HMDB0094708		Organic oxygen compounds	Organooxygen compounds	Ethers	44809.6	68332.8	39577	22942.4	65735.5	69322.4	88025.7	118254	53967.8	77795.8	60347.9	72031.4	69303.7	74525.2	69342.4
M623T277	623.259	277.099	Thalsimidine	[M+H]+						25075.9	13980.1	25076.1	99.5244	14754	25266.6	11625.7	5084.77	22967.1	17946.3	12682.7	1418.79	31356	31355.7	33883.7
M265T358	265.11	357.802	Thiamine	[M]+	HMDB0000235	C00378	Organoheterocyclic compounds	Diazines	Pyrimidines and pyrimidine derivatives	669641	346324	724027	334421	282871	467407	483855	534170	742050	860154	461520	938384	676079	676163	713709
M345T497_2	345.076	496.536	Thiamine monophosphate	[M+H]+	HMDB0002666	C01081	Organoheterocyclic compounds	Diazines	Pyrimidines and pyrimidine derivatives	122025	113373	100006	17664.4	91995.5	122463	74138.7	143258	142125	241261	147301	275117	149468	149207	153333
M425T509	425.042	508.695	Thiamine pyrophosphate	[M+H]+	HMDB0062636		Organoheterocyclic compounds	Diazines	Pyrimidines and pyrimidine derivatives	10615.7	7481.25	10270.1	2752.86	8240	5688.3	7857.18	12646	6820.84	7285.4	4480.75	10865.2	10834.2	10800.4	11951.4
M134T234	134.026	234.437	Thiazolidine-4-carboxylic acid	[M+H]+		C07732	Organic acids and derivatives	Carboxylic acids and derivatives	Amino acids, peptides, and analogues	68706.4	52430.4	44657.8	1541.14	44645.4	16938.5	75370.5	218157	30925.1	161510	33831.4	198873	144980	141792	144971
M509T593	508.861	592.853	Thifluzamide	[M+H-HF+2i]+		C18505	Organoheterocyclic compounds	Azoles	Thiazoles	7226.32	9394.89	8449.37	9821.07	8545.66	6650.55	12360.5	6671.21	8431.76	6795.51	13401.2	5610.45	6238.86	5930.56	6254.69
M719T143	718.57	142.526	Thioetheramide-PC	(M+H-H2O)+						4.20997e+06	4.77648e+06	4.45024e+06	2.15613e+06	1.62015e+06	4.41165e+06	2.50186e+06	1.43181e+06	3.98874e+06	1.29872e+06	2.46803e+06	1.93187e+06	714854	743408	744412
M235T439	235.091	439.348	Thr-Asp	[M+H]+			Organic acids and derivatives	Carboxylic acids and derivatives	Amino acids, peptides, and analogues	8950.88	7402.12	7596.34	5950.28	13957	10900.5	14900.4	18470.7	563.511	21893.4	12011.7	25318.3	17976.3	17964.9	18679
M233T245	233.148	244.873	Thr-Leu	(M+H)+						1882.34	1895.38	1194.41	1055.18	329.184	9806.8	1043.91	10987	9695.21	9483.37	424.825	10999	12665	13070.8	13084.9
M282T436	282.117	436.378	Thr-Tyr	M+						14757.4	14409.4	18635.6	4399.29	18653.9	37788.5	28173.4	34989	43957.8	31183.4	24952	46755.7	34647.5	32412.1	32419.3
M323T375_1	323.063	375.392	Thymidine 5'-monophosphate	(M+H)+						2205.57	2393.84	2603.75	787.78	1957.35	2479.23	2534.88	6553.09	3226.06	8349.15	2530.15	10412	5444.68	5444.04	5508.43
M127T99	127.049	98.669	Thymine	[M+H]+	HMDB0000262	C00178	Organoheterocyclic compounds	Diazines	Pyrimidines and pyrimidine derivatives	13176.4	20817.3	51769.3	7620.68	152612	44824.4	11635.3	84832.1	16203.9	154931	101762	190561	115116	110739	120299
M385T31	385.177	30.6665	Thyrotropin-releasing hormone	[M+Na]+	HMDB0060080	C03958	Organic acids and derivatives	Carboxylic acids and derivatives	Amino acids, peptides, and analogues	19340.4	20377.1	19928.2	8361.23	13330.9	19558.7	22420.5	20002.5	24758.3	24635.6	14327.4	11572.8	25904.4	24251.6	24216.8
M165T327	165.053	326.994	trans-2-Hydroxycinnamic acid	(M+H)+						92020	109990	146730	75833.4	117878	116413	127538	107155	98782.7	115695	101339	102715	120891	123315	120885
M147T302_3	147.043	301.815	trans-3-Coumaric acid	(M+H-H2O)+						131224	135965	157567	29863.5	131671	186578	117138	215418	153350	221426	111745	277461	240828	239858	240831
M149T112	149.07	112.186	trans-cinnamate	[M+H]+	HMDB0000930	C10438	Phenylpropanoids and polyketides	Cinnamic acids and derivatives	Cinnamic acids	15018.2	11569.5	8054.13	7327.61	30819.5	23552	16393.4	138524	12170	183572	22456.2	222521	85125.1	74355.5	85978.5
M149T258	149.059	257.846	Trans-cinnamic acid	[M+H]+	HMDB0000930	C00423	Phenylpropanoids and polyketides	Cinnamic acids and derivatives	Cinnamic acids	228611	210993	259454	16228.2	189237	294758	174967	470760	221739	402502	179374	573825	455574	450319	455558
M283T330_2	283.121	329.956	trans-Zeatin	(M+CH3CN+Na)+	HMDB0012204	C00371	Organoheterocyclic compounds	Imidazopyrimidines	Purines and purine derivatives	4609.3	6175.65	3153.66	2154.59	8262.74	6994.83	5927.46	2273.1	6688.32	2799.76	7229.52	522.978	3953.47	3913.61	3954.17
M211T81	211.132	80.55	Traumatic Acid	(M+H-H2O)+	HMDB0000933	C16308	Lipids and lipid-like molecules	Fatty Acyls	Fatty acids and conjugates	121197	168123	28948.3	6150.1	70280.7	63102.2	54207.2	110878	259491	82930.9	50058.8	37285.4	28771.9	27316.5	27009.6
M329T235	329.003	234.577	Tri(3-chloropropyl) phosphate	[M+H+2i]+			Organic acids and derivatives	Organic phosphoric acids and derivatives	Phosphate esters	17097.4	9196.6	9498.78	14397.6	13539.9	5836.56	14866	23084.1	11366.9	12601	7486.7	30951.2	13855.9	13811	15409.7
M797T35	796.691	35.38	Triacylglycerol 14:0-16:0-16:0	[M+NH4]+			Lipids and lipid-like molecules	Glycerolipids	Triradylcglycerols	5554.45	4669.67	4042.15	2054.1	2097.03	6718.24	4405.09	2158.3	4112.51	2122.06	1900.05	2283.22	1029.65	1073.19	1118.87
M457T380	457.187	379.579	Triamcinolone acetonide	[M+Na]+		C08183	Lipids and lipid-like molecules	Steroids and steroid derivatives	Hydroxysteroids	14882.9	16374.9	15095.8	3189.65	11293.3	13690.8	15472.1	20796.4	21058.8	19115.3	16485.3	25611.1	19781.9	19777.9	20102.8
M304T107	304.174	107.385	Tribenzylamine n-oxide	[M+H]+						6904.92	12183.3	48707.3	5914.97	17596.4	9012.78	17325.9	64671.1	10272.9	8313.62	14357	44998.9	38576.1	38578.7	34134.3
M150T156	150.111	155.99	Triethanolamine	[M+H]+	HMDB0032538	C06771	Organic nitrogen compounds	Organonitrogen compounds	Amines	117233	123682	22711.9	56985	183568	103412	109536	112212	99827.9	95823.4	126454	605695	237979	230965	230977
M183T38	183.101	38.3225	Triethyl phosphate	[M+H]+			Organic acids and derivatives	Organic phosphoric acids and derivatives	Phosphate esters	60655	42560.8	48148.4	2944.95	73109.6	12964.3	60038.6	73254.8	109070	61560.9	73534.1	67337.1	49559.8	49560.6	48735.2
M151T36_1	151.096	36.152	Triethylene glycol	[M+H]+			Organic oxygen compounds	Organooxygen compounds	Ethers	53541	57000.7	42148.3	20153.5	74878.3	62968.2	76212.9	99619.1	83052.3	81749.3	63270	70095.9	112283	112351	118265
M346T200	346.083	199.862	Triflumizole	[M+H]+		C18493	Benzenoids	Benzene and substituted derivatives	Trifluoromethylbenzenes	1115.26	1697.51	3061.45	459.16	2132.91	3489.49	758.807	1116.42	1351.32	1367.74	793.35	543.522	1898.76	2294.19	2293.06
M60T242	60.0797	241.913	Trimethylamine	[M+H]+	HMDB0000906	C00565	Organic nitrogen compounds	Organonitrogen compounds	Amines	6322.34	28017.3	8190.52	198.563	18211.5	35181.4	13485.3	691.308	4570.43	1646.7	30601.6	1120.74	2519.5	2504.96	2688.85
M457T471	457.189	471.042	Trioxsalen	[2M+H]+	HMDB0015575	C09314	Phenylpropanoids and polyketides	Coumarins and derivatives	Furanocoumarins	3541.67	1970.19	1011.19	4018.73	3247.46	3233.9	4220.81	2915.3	1897.32	6333.83	5868.04	12664.1	5688.6	5761.96	5688.81
M327T233	327.007	232.958	Tris(1-chloro-2-propyl) phosphate	[M+H]+			Organic acids and derivatives	Organic phosphoric acids and derivatives	Phosphate esters	19624.5	14876.5	13267.4	19977.9	22077	6241.51	19846.1	16529.6	9469.23	20448.3	10138.1	20558.8	14410.7	14166.4	14405.9
M287T248	286.974	247.928	Tris(2-chloroethyl) phosphate	[M+H+2i]+		C14445	Organic acids and derivatives	Organic phosphoric acids and derivatives	Phosphate esters	128445	364430	385892	188655	261673	356417	219544	299678	362138	389493	302411	329855	256688	282577	282552
M122T357	122.07	356.983	Tris(hydroxymethyl)aminomethane	[M+H]+	HMDB0240288	C07182	Organic nitrogen compounds	Organonitrogen compounds	Amines	124095	320856	183888	98567.9	244469	308775	177445	213390	144089	525461	172205	382556	359173	381223	358511
M490T452	490.222	452.075	Trp-Glu-Arg	[M+H]+			Organic acids and derivatives	Carboxylic acids and derivatives	Amino acids, peptides, and analogues	17622.1	15006.2	14647.6	1949.1	11688.4	19557.4	16048.3	25313	24376.2	22763.3	15481.6	33592.6	25026	25729.4	25049.9
M492T475	492.238	474.536	Trp-Met-Arg	[M+H]+			Organic acids and derivatives	Carboxylic acids and derivatives	Amino acids, peptides, and analogues	27660.9	33410.4	35771.2	6654.5	32103.6	45572.2	40288.5	70231.9	52129.3	71664.5	46190.3	55223.1	43322.7	41753.8	43288.5
M366T412	366.131	412.068	Trp(dioxidation)-Glu	[M+H]+			Organic acids and derivatives	Carboxylic acids and derivatives	Amino acids, peptides, and analogues	11573.2	15990.3	7788.77	1433.95	7610.55	9822.08	9701.31	21146.6	11479.2	18618	13500.9	26471.3	17736.8	16784.9	17760.4
M376T36	376.258	36.002	Tuberostemonine	[M+H]+			Alkaloids and derivatives	Stemona alkaloids	Stemoamide-type alkaloids	602316	738303	888883	151917	1.00448e+06	826648	658399	1.26385e+06	1.7414e+06	1.86807e+06	1.24227e+06	2.13042e+06	2.36276e+06	2.33686e+06	2.33679e+06
M568T56	568.453	55.66	Tunaxanthin	[M]+*			Lipids and lipid-like molecules	Prenol lipids	Tetraterpenoids	36361.6	29217.3	20848.1	10720.5	5930.93	31208.7	15806	9663.46	9691.77	2928.12	4970.73	2041.95	2368.24	2619.99	2363.1
M299T38	299.185	37.601	Turkesterone	[M+H-C8H22O5]+			Lipids and lipid-like molecules	Steroids and steroid derivatives	Bile acids, alcohols and derivatives	36112.5	21192.2	21553.4	9429.23	63381	38651	59252	90184.2	131691	61505	55968.2	32715.3	33933.1	32172.8	33879.3
M543T173	543.183	172.684	Tyr-Ala	(2M+K)+						19131.2	19890.4	59916.7	1839.59	51948.7	64557.7	14740.5	64937	29364.8	86163.9	32662.2	149353	77010	77003.2	78615
M314T302_2	314.137	302.187	Tyr-Asp	(M+NH4)+						3858.88	3321	4790.69	479.712	3562.75	3334.56	2515.63	3516.09	3807.49	5521.4	2399.56	4192.66	7517.21	7515.36	6705.55
M371T176	371.141	176.213	Tyr-Glu	(M+CH3COO+2H)+						9800.85	3614.1	6531.97	1018.26	2494.59	5615.18	8531.7	9183.79	8468.18	6025.07	7570.45	10383.5	9890.06	8809.19	8823.21
M234T52	234.097	52.231	Tyr-Glu-Arg	[M+2H]2+			Organic acids and derivatives	Carboxylic acids and derivatives	Amino acids, peptides, and analogues	27005.4	31085.3	19991.4	10224.8	22829.7	49795.7	47021.3	65744.7	46749	40617.1	37363.4	22700.6	51761.5	51802.5	49615.1
M239T289_2	239.101	288.677	Tyr-Gly	[M+H]+			Organic acids and derivatives	Carboxylic acids and derivatives	Amino acids, peptides, and analogues	6434.36	3191.31	5404.19	5511.97	3376.09	4148.88	3323.47	1493.86	566.859	1284.97	1251.62	645.449	1173.63	1177.31	986.852
M295T214	295.163	213.618	Tyr-Ile	[M+H]+			Organic acids and derivatives	Carboxylic acids and derivatives	Amino acids, peptides, and analogues	9740.56	9564.31	10744.1	1942.13	9191.37	8513.66	4524.76	2540.84	4733.06	1169.1	4731.08	6643.5	2062.35	2063.24	2052.49
M329T204	329.149	204.458	Tyr-Phe	[M+H]+			Organic acids and derivatives	Carboxylic acids and derivatives	Amino acids, peptides, and analogues	6228.5	6207.14	9045.43	703.902	6447.08	7234.17	4031.49	5412.86	5259.49	7482.03	3921.3	5466.62	6360.39	6479.79	6482.51
M283T216	283.116	216.453	Tyr-Thr	[M+H]+			Organic acids and derivatives	Carboxylic acids and derivatives	Amino acids, peptides, and analogues	6549.41	8963.45	3873.42	1182.01	4954.54	10311.1	5318.4	12954.9	15119	17901.3	3228.1	9075.11	10342.2	10231.2	11955.7
M409T318	409.269	318.44	Tyr-Val-Lys	[M+H]+			Organic acids and derivatives	Carboxylic acids and derivatives	Amino acids, peptides, and analogues	9702.15	29747.5	14957.9	24798.6	8611.3	8003.34	10032.1	10386.4	12812.6	16148.2	34176	11066.9	9863.55	10749.9	10674.7
M120T296	120.08	295.782	Tyramine	(M+H-H2O)+	HMDB0000306	C00483	Benzenoids	Benzene and substituted derivatives	Phenethylamines	323862	280494	111666	246423	138322	238275	136907	1.11487e+06	200056	334855	171896	167783	251980	240582	252232
M584T455	584.086	454.89	UDP-D-Galactose	(M+NH4)+	HMDB0000302/HMDB0062573	C00052	Nucleosides, nucleotides, and analogues	Pyrimidine nucleotides	Pyrimidine nucleotide sugars	162290	141431	145393	26837.7	137891	182070	142277	309887	195456	320375	145582	383388	279886	279928	276731
M258T154	258.169	153.675	Undecanedioic acid	(M+CH3CN+H)+	HMDB0000888		Lipids and lipid-like molecules	Fatty Acyls	Fatty acids and conjugates	4909.61	8187.66	1438.66	746.083	11097.9	6205.06	8710.52	3548.63	6865.44	2017.52	2579.84	1210.03	2295.9	2308.29	2073.5
M113T163	113.034	162.93	Uracil	[M+H]+	HMDB0000300	C00106	Organoheterocyclic compounds	Diazines	Pyrimidines and pyrimidine derivatives	92179.6	105669	195111	12354.8	159384	200154	112592	232522	172380	456647	170942	549574	277855	274244	277950
M405T487	405.008	487.355	Uridine 5'-diphosphate	[M+H]+	HMDB0000295	C00015	Nucleosides, nucleotides, and analogues	Pyrimidine nucleotides	Pyrimidine ribonucleotides	195422	146034	156238	29744	132013	168258	115455	235662	163273	257385	120598	319544	267114	264712	267122
M422T442	422.034	441.928	Uridine 5'-diphosphate (UDP)	(M+NH4)+	HMDB0000295	C00015	Nucleosides, nucleotides, and analogues	Pyrimidine nucleotides	Pyrimidine ribonucleotides	93792.4	100331	109159	25499.4	95728	112622	79164	131406	101823	141134	78035.5	147521	128699	128702	126176
M589T455	589.041	455.278	Uridine 5'-diphosphogalactose	[M+Na]+	HMDB0015279	C00052	Nucleosides, nucleotides, and analogues	Pyrimidine nucleotides	Pyrimidine nucleotide sugars	39021.7	33579	38704.2	9908.61	34624.3	46562	35391.3	59675.3	53294.5	65354.9	37285.3	81392.1	60279.3	59680.3	60281.9
M233T443	233.085	443.213	Val-Ala	(M-H+2Na)+						4760.88	2026.26	3024.03	1327.45	3130.1	3938.91	2274.74	2660.25	3676.73	5544.52	2058.23	2445.05	4251.84	4839.02	4288.59
M159T268	159.112	268.058	Val-Ala-Lys	[M+2H]2+			Organic acids and derivatives	Carboxylic acids and derivatives	Amino acids, peptides, and analogues	3730.11	2976.34	7968.55	12819.1	5261.69	5172.18	4681.29	37474.4	5645.15	30887	3714.46	16884.4	33065.6	31741.6	31746.6
M196T240	196.107	239.777	Val-Asn	(M+H-2H2O)+						3690.81	77.6168	182.458	604.704	1839.25	336.115	1853.18	2460.74	1448.67	3329.21	245.563	2689.32	2102	1872.96	1881.65
M233T406_2	233.112	406.107	Val-Asp	(M+H)+						16855	16954.2	18672.3	2503.54	13492.4	20579.4	19812.7	34496.7	28346.3	37739.8	21179.4	48301.4	32063.6	31703.9	32058.5
M389T380	389.213	379.77	Val-Asp-Arg	[M+H]+			Organic acids and derivatives	Carboxylic acids and derivatives	Amino acids, peptides, and analogues	23676.1	23314.3	23838.4	3789.6	17860.1	25060.9	24617.3	50380.4	37144.7	47808.6	26166.8	61908.8	41070.6	43286	43203.8
M202T211	202.106	211.201	Val-Glu-Arg	[M+2H]2+			Organic acids and derivatives	Carboxylic acids and derivatives	Amino acids, peptides, and analogues	8277.83	6766.62	5989.76	3417.73	6817.46	6971.98	9995.64	1343.9	8086.99	2010.89	5303.08	2253	1688.17	1521.41	1690.14
M231T211	231.169	211.402	Val-Ile	[M+H]+			Organic acids and derivatives	Carboxylic acids and derivatives	Amino acids, peptides, and analogues	7146.92	3714.58	6653.32	2234.77	5069.84	4575.7	3397.61	2583.68	3509.33	209.345	3312.63	4185.58	437.869	633.992	468.401
M195T530	195.147	529.607	Val-Leu	(M+H-2H2O)+						1101.59	7542.17	1048.64	7957.57	8195.74	3248.1	725.568	3972.19	1569.21	7956.35	8159.46	5009.84	3479.13	3272.06	3274.07
M215T327	215.138	327.365	Val-Pro	[M+H]+			Organic acids and derivatives	Carboxylic acids and derivatives	Amino acids, peptides, and analogues	32021.9	29628.2	29114.4	8486.27	32889.2	28290.3	35436.4	6362.42	37216.5	8278.08	36900.4	778.172	13272.9	13949.3	13276.2
M188T501	188.115	500.584	Val-Thr-Arg	[M+2H]2+			Organic acids and derivatives	Carboxylic acids and derivatives	Amino acids, peptides, and analogues	72510.9	65270	71462.5	11233.5	65751.3	91879.7	63431.6	153464	96714	148741	82849.7	199564	149890	149111	147574
M217T376	217.153	376.394	Val-Val	[M+H]+			Organic acids and derivatives	Carboxylic acids and derivatives	Amino acids, peptides, and analogues	23703.1	24342.9	27470.6	6303.41	21626.5	27010.9	31860.8	56525.7	43060.2	45280.7	36417.2	58041.9	39571.2	41205.9	39524.1
M520T410	520.22	409.981	Validamycin a	[M+Na]+		C12112	Organic oxygen compounds	Organooxygen compounds	Carbohydrates and carbohydrate conjugates	4158.6	5566.67	2824.96	814.748	1912.9	2999.98	3392.32	4387.28	5341.02	7031.61	5275.11	5997.76	6341.24	5634.18	6356.33
M772T435_2	772.439	435	Venturicidin a	[M+Na]+			Lipids and lipid-like molecules	Prenol lipids	Terpene lactones	2436.32	2177.74	2414.73	335.073	1828.8	3146.09	4081.02	12020.7	5804.69	7480.45	3034.67	15986.5	6929.36	6655.1	6652.96
M674T286	674.343	286.096	Veratridine	[M+H]+		C06544	Lipids and lipid-like molecules	Steroids and steroid derivatives	Steroidal alkaloids	2355.69	1873.33	4124.73	826.165	1773.01	4015.66	3370.72	3029.11	1557.09	2663.24	1685.55	4114.65	2013.23	1645.61	1897.37
M825T427	825.391	427.087	Vincristine sulfate	[M+H]+		C13974				3649.67	4941.21	5379.68	403.053	3540.54	4125.18	4991.3	9313.68	5886.95	9888.03	4312.21	14565.9	10501.5	10284.6	10276.9
M429T407	429.157	407.419	Wortmannin	[M+H]+		C15181	Lipids and lipid-like molecules	Steroids and steroid derivatives	Oxasteroids and derivatives	24388.6	26968.9	23484	6274.61	23084.9	29425.7	29418	44406.5	34719.5	44558	34755.9	57739.4	36248.2	35719.4	36257.6
M285T323	285.083	323.28	Xanthosine	[M+H]+	HMDB0000299	C01762	Nucleosides, nucleotides, and analogues	Purine nucleosides		2004.69	4414.65	2367.68	1325.91	1603.49	4187.58	968.278	1332.45	1283.88	1915	694.476	397.474	3045.89	3220.75	3220.06
M485T36_2	485.288	36.107								2.07465e+06	2.42655e+06	1.92477e+06	394378	649007	2.21711e+06	2.01312e+06	2.35609e+06	1.61013e+06	9.08799e+06	8.88686e+06	652869	5.81391e+06	5.83643e+06	5.83635e+06
M104T247	104.107	247.236								2.46811e+07	2.6861e+07	2.92076e+07	169390	2.4322e+07	3.69653e+07	2.25404e+07	3.47209e+06	7.5874e+06	6.53815e+06	2.63599e+07	1.29243e+06	3.6002e+06	2.89861e+06	2.91678e+06
M759T41_1	758.567	40.676								1.0688e+07	1.0845e+07	1.28553e+07	7747.1	15644.3	1.41572e+07	45869.9	4.57648e+06	30155.7	5.4078e+06	19103.2	1.153e+07	4.99515e+06	4.99192e+06	5.14773e+06
M759T106	758.567	106.415								5.11158e+06	5.73841e+06	5.08704e+06	42786.8	1.02561e+07	6.23178e+06	1.73326e+07	315577	2.80722e+07	523899	1.47514e+07	1.22226e+06	393284	393534	418405
M104T220_2	104.107	220.406								70723.1	83186.3	48744.1	85601.8	70121	450627	60985.9	1.87227e+07	3.89804e+07	2.38286e+07	68807.8	3.25829e+07	2.39123e+07	2.43481e+07	2.39176e+07
M269T342	268.999	341.997								2.84106e+07	3.76226e+07	3.72306e+07	995738	3.15057e+07	4.43645e+07	3.3212e+07	4.54001e+07	4.80884e+07	7.71673e+07	4.3057e+07	5.39835e+07	4.43201e+07	4.39744e+07	4.43275e+07
M269T331	269.054	331.344								7145.78	7699.75	6324.41	1217.14	3114.08	5210.99	6911.4	1765.74	6965.45	2.18426e+07	6955.61	3.33095e+07	2.15873e+07	2.41863e+07	2.16217e+07
M733T105	732.55	105.174								3.68927e+06	3.54877e+06	3.48188e+06	406085	7.24392e+06	3.70633e+06	2.11016e+07	749735	1.80326e+07	957184	1.24971e+07	653336	505290	626455	629852
M663T34_2	663.452	33.55								5.33305e+06	4.78501e+06	4.09328e+06	1.18248e+06	1.23625e+06	5.97029e+06	2.6661e+06	700711	1.95902e+06	745254	1.15673e+06	1.17799e+06	510206	591802	563008
M785T41	784.582	40.675								6.40704e+06	6.59213e+06	7.73078e+06	6890.27	19151.7	8.85539e+06	242091	2.57863e+06	19224.7	2.91008e+06	11372.4	5.97436e+06	2.61918e+06	2.61024e+06	2.686e+06
M136T186	136.061	186.243								4.51633e+06	1.70046e+06	2.56792e+06	2.59253e+06	8.37126e+06	9.11361e+06	4.26126e+06	9.17886e+06	7.6475e+06	1.23401e+07	4.98093e+06	2.39758e+07	1.13831e+07	1.11475e+07	1.11435e+07
M432T38	432.237	38.087								1.84561e+06	1.47512e+06	1.94013e+06	1.02109e+06	2.78431e+06	2.51684e+06	2.26586e+06	2.87488e+06	2.59707e+06	2.98805e+06	2.22587e+06	3.64135e+06	3.42681e+06	3.4331e+06	3.42681e+06
M272T38	272.257	38.2365								1.26442e+06	1.26934e+06	1.64445e+06	392409	847705	2.34818e+06	1.98961e+06	2.96957e+06	1.61606e+06	3.25534e+06	833780	772411	2.72054e+06	2.6599e+06	2.71693e+06
M733T41	732.551	40.738								6.31742e+06	6.78936e+06	7.81709e+06	16509.1	115234	7.93998e+06	116850	3.46389e+06	149553	3.91648e+06	113359	8.51094e+06	3.30508e+06	3.2654e+06	3.30923e+06
M387T39	387.179	38.939								829534	624811	907589	588566	2.06531e+06	672934	1.84243e+06	1.17714e+06	1.82799e+06	1.13505e+06	1.83673e+06	2.21006e+06	1.00554e+06	1.02043e+06	1.00351e+06
M332T111	332.33	111.049								168792	129069	170788	47794.1	49765.7	416034	1.15166e+07	1.5079e+06	68235.4	113303	64286	29370.6	112875	117118	112847
M502T36_1	502.313	36.2165								915750	1.10485e+06	850347	173486	262569	976810	854202	1.05784e+06	678921	4.01018e+06	3.90493e+06	312640	2.33911e+06	2.33915e+06	2.41548e+06
M258T427	258.109	427.288								603580	367840	385658	39859.1	335329	325500	464642	751046	9.19985e+06	205180	328536	565674	568163	667694	567738
M515T343	515.006	342.642								6.17809e+06	9.21235e+06	9.56659e+06	41588.8	7.74776e+06	1.35466e+07	7.88685e+06	1.94736e+07	1.5409e+07	2.60164e+07	1.2663e+07	1.98434e+07	2.00127e+07	2.00269e+07	1.91566e+07
M304T51	304.298	50.5075								1.03953e+06	249434	1.07601e+06	107446	4.34965e+06	2.16942e+06	1.08239e+06	1.99226e+07	3.07892e+06	2.5566e+06	3.24235e+06	148386	2.2183e+06	2.14316e+06	2.14317e+06
M537T389	537.193	388.509								4.54676e+06	4.02525e+06	3.91228e+06	94217.2	3.83837e+06	3.31943e+06	4.88741e+06	6.77417e+06	4.65645e+06	2.05777e+06	2.94073e+06	5.32773e+06	5.39802e+06	5.39679e+06	5.61909e+06
M187T341	186.995	340.507								1.29853e+07	1.62904e+07	1.70036e+07	859426	1.47397e+07	1.99821e+07	1.52281e+07	3.37658e+07	2.03065e+07	3.12367e+07	1.90729e+07	3.94323e+07	2.85822e+07	2.84434e+07	2.85804e+07
M328T494_1	327.597	493.555								1.49763e+06	741135	1.19121e+06	171247	704622	977272	1.10113e+06	2.29492e+06	1.79515e+06	2.49954e+06	1.23596e+06	3.0311e+06	2.34355e+06	2.34373e+06	2.37639e+06
M433T342	433.003	342.428								6.19814e+06	8.68146e+06	8.94567e+06	89488.7	7.38075e+06	1.13225e+07	7.59135e+06	2.53067e+07	1.21798e+07	1.39388e+07	1.07629e+07	1.67902e+07	1.922e+07	1.92184e+07	1.93868e+07
M280T389	280.091	388.93								7.85731e+06	6.87801e+06	7.53627e+06	1.86268e+06	7.14106e+06	6.64594e+06	8.6899e+06	1.07971e+07	7.58317e+06	5.97604e+06	6.31138e+06	9.74719e+06	9.23117e+06	9.32787e+06	9.26883e+06
M322T489	322.076	489.315								1.32559e+06	916729	944536	125558	727539	1.03661e+06	895184	2.36184e+06	1.49827e+06	2.39167e+06	965797	3.04717e+06	2.19135e+06	2.16637e+06	2.19148e+06
M676T181	675.541	181.093								4.77954e+06	4.85969e+06	4.76151e+06	583377	554181	3.37342e+06	1.7653e+06	364110	782962	227669	936243	309695	192272	199421	199377
M702T180	701.557	179.611								4.79156e+06	4.80007e+06	5.28626e+06	677897	685033	3.88529e+06	1.77784e+06	404895	861726	253228	1.01791e+06	373055	208424	216591	214854
M530T36_1	530.345	36.112								581765	633126	563675	297507	340151	527050	593833	421924	442358	1.57195e+06	2.64548e+06	277087	1.18354e+06	1.16463e+06	1.1647e+06
M407T35	407.277	34.817								1.12082e+06	1.09244e+06	1.28499e+06	271004	878617	1.20978e+06	1.09291e+06	1.99144e+06	1.42381e+06	2.01522e+06	994813	1.1004e+06	1.90568e+06	1.85106e+06	1.90587e+06
M460T38	460.267	38.262								862248	701511	1.37321e+06	1.40163e+06	1.93279e+06	1.27322e+06	1.56204e+06	1.13336e+06	1.29112e+06	1.34411e+06	1.81325e+06	1.78261e+06	1.77293e+06	1.75834e+06	1.75837e+06
M230T142_3	230.247	141.638								2.32168e+06	1.17041e+06	1.92984e+06	438456	1.42459e+06	2.93324e+06	3.35308e+06	7.04665e+06	1.58111e+06	5.2004e+06	945197	456246	5.8324e+06	6.06091e+06	5.83286e+06
M759T57	758.567	56.5595								5.00766e+06	4.37988e+06	2.12997e+06	3304.72	7507.33	3.2501e+06	263997	556893	11098.1	479423	2787.83	9.77584e+06	467535	458130	467059
M783T41	782.566	40.6865								2.11093e+06	2.11322e+06	2.39885e+06	3379.78	2595.97	3.3244e+06	124003	1.12147e+06	15082	1.18382e+06	7171.15	2.36262e+06	1.18822e+06	1.18813e+06	1.20333e+06
M175T52_2	175.085	51.947								458032	440845	505912	318597	2.60823e+06	1.04748e+06	573297	1.35675e+06	1.13925e+06	1.23709e+06	915889	741016	1.14062e+06	952220	1.14209e+06
M235T312	234.917	312.199								3.0269e+06	2.87488e+06	3.13955e+06	26416.6	2.47597e+06	3.92151e+06	3.09531e+06	8.17262e+06	5.25634e+06	8.16251e+06	3.22138e+06	9.21531e+06	6.87189e+06	6.87096e+06	6.91353e+06
M400T152_2	400.341	152.36								76484	74435	171271	10583.2	19750.9	2.08974e+06	19758.2	7.42149e+06	48293.9	6.31344e+06	31221.4	730958	6.20571e+06	5.7542e+06	6.21847e+06
M787T57	786.598	57.424								5.10112e+06	4.44701e+06	1.61639e+06	3918.85	6368.77	907434	1.89766e+06	368826	42312.7	516925	2591.4	5.00402e+06	342184	341009	349007
M322T264	322.054	264.288								262930	359330	371190	3242.67	187141	490635	188974	809334	414599	751611	192460	3.76596e+06	884698	870184	884651
M318T66	318.299	66.218								1.07115e+06	1.05598e+06	1.22953e+06	299735	686073	1.45142e+06	2.25462e+06	2.86924e+06	2.06491e+06	2.74943e+06	3.45296e+06	505475	1.91265e+06	1.91464e+06	1.91633e+06
M284T116	284.33	116.174								821129	493736	363095	1.47491e+06	60058.5	426324	561113	6.16988e+06	69408.3	4.95054e+06	569379	24828.4	231105	236493	231221
M104T294	104.106	294.131								3.94869e+06	4.33671e+06	4.62039e+06	2.42515e+06	4.25469e+06	5.66068e+06	2.55641e+06	102012	3.49065e+06	4.78916e+06	3.58658e+06	3.17302e+06	4.44222e+06	4.66384e+06	4.4425e+06
M298T349	298.024	348.653								1.48563e+06	1.47678e+06	1.74141e+06	9224.79	1.40194e+06	2.32793e+06	1.15849e+06	3.68893e+06	2.09168e+06	3.79852e+06	1.52017e+06	4.89283e+06	3.74108e+06	3.71735e+06	3.71722e+06
M398T173	398.325	173.097								2.34007e+06	1.85082e+06	2.06442e+06	355226	1.46548e+06	2.11408e+06	2.82592e+06	3.71124e+06	3.81001e+06	3.53873e+06	2.85018e+06	574876	2.60648e+06	2.6321e+06	2.632e+06
M244T261	244.079	261.409								1.69706e+06	1.71366e+06	2.64644e+06	63623.7	1.50896e+06	2.94381e+06	1.05875e+06	3.66028e+06	1.74636e+06	6.04711e+06	1.51452e+06	3.49838e+06	4.70106e+06	4.74184e+06	4.74172e+06
M413T34	413.264	34.177								1.67914e+06	1.63256e+06	1.90639e+06	1.18956e+06	896459	1.84509e+06	1.6457e+06	1.64661e+06	1.04153e+06	1.40593e+06	923811	1.03714e+06	1.96496e+06	1.94961e+06	1.94958e+06
M304T64	304.285	64.093								2.20359e+06	1.69359e+06	2.13474e+06	446510	3.64453e+06	1.52287e+06	2.19809e+06	5.69664e+06	3.50678e+06	2.38197e+06	3.05901e+06	812587	1.57306e+06	1.40854e+06	1.40822e+06
M597T343	597.008	342.639								2.57081e+06	3.73017e+06	4.0595e+06	8626.16	3.25553e+06	5.40105e+06	3.40842e+06	8.3981e+06	6.20174e+06	7.5432e+06	5.27885e+06	9.37272e+06	1.01796e+07	1.00262e+07	1.01785e+07
M745T140	744.586	139.717								5.80142e+06	5.95416e+06	6.1226e+06	2.69352e+06	2.1058e+06	5.53402e+06	2.82796e+06	1.86273e+06	3.11243e+06	1.67629e+06	3.0273e+06	2.28056e+06	969883	1.02221e+06	1.02328e+06
M290T89	290.269	89.058								1.00916e+07	9.89774e+06	9.74699e+06	2.64874e+06	8.75413e+06	9.07007e+06	7.56407e+06	3.3227e+06	1.25438e+07	4.19669e+06	7.71226e+06	2.02918e+06	7.39847e+06	5.27815e+06	7.44142e+06
M152T103	152.07	102.728								2.96317e+06	2.86181e+06	3.29251e+06	301686	2.57613e+06	3.45204e+06	1.69149e+06	6.39152e+06	2.45894e+06	6.98668e+06	2.8097e+06	1.20532e+07	5.87488e+06	6.24353e+06	5.86818e+06
M336T37_3	336.325	36.822								786397	726303	1.04771e+06	261394	367406	682307	658670	814539	516979	1.00093e+06	399003	399943	817474	817412	795423
M757T41	756.55	40.6755								1.42906e+06	1.54623e+06	1.82481e+06	11292	13005.5	2.23834e+06	27307.3	949501	24748.6	1.0127e+06	12965.7	1.8288e+06	963832	963393	979722
M693T145	692.554	145.291								2.68551e+06	2.96981e+06	2.40914e+06	899207	858934	1.91539e+06	876801	438543	729460	439765	840571	661986	193204	200052	199968
M787T91	786.598	91.084								2.71862e+06	2.61257e+06	2.7876e+06	5471.54	10086.4	1.78504e+06	1.47673e+07	1.40951e+06	8.36212e+06	627572	3638.11	586714	342938	327829	305609
M333T312	332.894	312.218								1.54248e+06	1.4437e+06	1.62309e+06	2097.06	1.18815e+06	2.12196e+06	1.55798e+06	5.29399e+06	3.00361e+06	5.27028e+06	1.67426e+06	5.93931e+06	4.3347e+06	4.31046e+06	4.33466e+06
M129T350	128.953	349.566								1.38094e+07	1.54888e+07	1.54778e+07	4.84673e+06	1.4773e+07	9.15881e+06	8.86392e+06	1.0731e+07	1.51696e+07	1.008e+07	9.42588e+06	1.02988e+07	8.95119e+06	9.20675e+06	8.9492e+06
M757T103	756.549	102.953								277618	73285.1	463006	8277.34	657734	473632	1.26798e+06	112916	1.67792e+06	48685.8	1.07662e+06	80877.5	31258.5	44900.4	35593.8
M316T41	316.32	41.0915								256628	214442	694603	398180	356612	344797	1.93204e+06	1.30759e+06	1.08313e+06	883925	468466	325518	1.38925e+06	1.32787e+06	1.32805e+06
M745T41	744.584	40.675								2.2469e+06	2.30124e+06	2.52861e+06	5330.68	15957.8	2.10893e+06	120692	807498	35835.5	999349	12890.8	2.0082e+06	883605	854080	883519
M113T37	113.059	37.415								13674.9	24856.4	1.31049e+06	327934	68824.3	18465.7	46103.8	38663.6	82100	18690.8	33344.7	6906.75	1.20883e+06	1.20883e+06	1.22152e+06
M436T34_2	436.34	34.122								1.52409e+06	1.2584e+06	1.63448e+06	819648	1.03356e+06	1.6142e+06	1.54701e+06	1.47058e+06	962991	1.45993e+06	1.06558e+06	1.05246e+06	1.66047e+06	1.66059e+06	1.6927e+06
M707T41	706.534	40.675								2.02669e+06	2.01767e+06	2.22249e+06	3552.78	3633.23	1.83675e+06	17769.8	790137	21591.3	860099	11050.2	2.20888e+06	703988	703779	729149
M503T37	503.318	36.542								356966	342485	301428	65601.5	124546	363380	269665	360692	262969	1.24433e+06	1.24816e+06	118278	747714	748351	751760
M680T34_2	680.478	33.549								1.26933e+06	1.07656e+06	1.01479e+06	300246	318047	1.42025e+06	654657	212067	451872	177856	279608	310387	131628	131936	140149
M421T36	421.315	36.107								392476	447775	555513	74996.4	456874	513453	377077	660905	762901	916733	589906	919864	1.14251e+06	1.14306e+06	1.12382e+06
M705T145	704.519	145.291								1.72902e+06	1.7259e+06	2.09105e+06	784693	545922	1.93097e+06	2.17563e+06	600403	756358	374303	894956	400137	313637	328940	320297
M137T312	136.94	312.18								2.95296e+06	2.7412e+06	2.95085e+06	102170	2.51612e+06	3.42467e+06	2.87426e+06	5.88502e+06	4.17357e+06	5.72336e+06	2.9911e+06	6.70963e+06	5.25706e+06	5.2571e+06	5.29961e+06
M482T38	482.403	38.087								403267	340544	377828	89832.4	393672	412208	461599	851815	638787	690542	365227	614373	734780	718268	718128
M404T39_1	404.204	39.311								204163	188325	195675	156250	612422	172862	390169	339832	501282	341153	511829	588684	298502	293643	293655
M526T39	526.429	39.051								259080	221170	180749	72009.6	561446	296819	504494	615842	703232	546164	432264	528419	541182	506974	541594
M344T489	344.058	489.315								796584	549570	621151	29495.1	479353	654089	642617	1.24693e+06	1.00572e+06	1.34657e+06	769750	1.42813e+06	1.15283e+06	1.13818e+06	1.13848e+06
M654T494	654.184	493.543								708386	357582	613614	53498.2	343248	489595	533708	1.11904e+06	897529	1.16552e+06	651868	1.26285e+06	1.11915e+06	1.13497e+06	1.11925e+06
M721T143	720.58	142.721								2.04857e+06	2.48689e+06	2.28109e+06	914178	604706	1.31237e+06	968345	524607	925583	588773	1.14597e+06	1.01125e+06	284264	278782	284468
M192T314_1	191.982	314.072								2.13797e+06	1.88592e+06	2.26391e+06	29167.2	1.7001e+06	2.51937e+06	1.86072e+06	3.91485e+06	2.75412e+06	4.27814e+06	1.93515e+06	4.93755e+06	3.78893e+06	3.76793e+06	3.78887e+06
M333T453	333.054	453.407								989703	810850	836972	350661	789666	1.03859e+06	810282	2.03331e+06	1.43179e+06	1.85799e+06	834070	1.65076e+06	1.41081e+06	1.39934e+06	1.41073e+06
M156T400_2	156.076	400.199								6.39317e+06	1.18567e+07	1.35904e+07	4.19538e+06	1.1355e+07	7.88915e+06	4.3483e+06	1.05558e+07	5.8486e+06	1.63382e+07	1.10709e+07	1.64495e+07	5.96831e+06	5.97118e+06	5.70833e+06
M809T136	808.581	135.785								3.40595e+06	3.6689e+06	3.71786e+06	1.83613e+06	1.12118e+06	3.77871e+06	1.92452e+06	991701	1.45821e+06	806302	1.37924e+06	1.19512e+06	687005	723488	708486
M787T77	786.598	77.0935								2.85281e+06	2.98249e+06	1.08506e+06	4237.61	7268.15	1.36823e+06	8.13471e+06	194513	1.51708e+06	393344	2476.29	671982	249851	245147	250184
M679T343	679.011	342.656								1.5481e+06	2.37064e+06	2.40658e+06	1581.49	1.9402e+06	3.38606e+06	2.08362e+06	5.62313e+06	3.825e+06	7.92436e+06	3.31848e+06	6.44364e+06	6.63201e+06	6.57522e+06	6.63173e+06
M333T109	333.333	109.091								51839.9	37390.8	48708.4	12424.2	8812.51	125810	3.03274e+06	403173	10809.9	29132.4	12207.6	5252.22	27292.4	26051.5	27300.2
M268T214_2	268.104	214.431								2.96835e+06	3.27544e+06	4.53299e+06	1.44794e+06	5.40177e+06	4.06536e+06	2.57699e+06	482924	1.80577e+06	1.1526e+06	1.84843e+06	1.09171e+06	675576	663937	675627
M769T118	768.586	118.012								931258	837262	760448	64273.1	2.00608e+06	575168	414264	47875.9	1.99728e+06	24382.4	2.38149e+06	71002.6	42116.7	43294.2	43285.9
M226T115	226.18	114.535								6.02466e+06	3.69016e+06	3.61751e+06	257015	2.86467e+06	3.17111e+06	1.33513e+06	6.22203e+06	1.95833e+06	5.08196e+06	1.95866e+06	3.44577e+06	4.50596e+06	4.51189e+06	4.51193e+06
M132T278	132.101	277.868								3.13221e+06	2.66891e+06	2.81345e+06	448210	2.56453e+06	3.6576e+06	2.24384e+06	1.85523e+06	3.00991e+06	2.73437e+06	2.41992e+06	1.42793e+06	3.80234e+06	3.78896e+06	3.80242e+06
M148T455	148.06	455.278								570732	491909	562880	56502.6	428471	652305	546466	1.1891e+06	844417	1.20298e+06	593930	1.54853e+06	1.06191e+06	1.06189e+06	1.04816e+06
M86T277	86.0959	277.438								5.50242e+06	2.76888e+06	2.9478e+06	472125	2.47559e+06	3.80337e+06	2.25303e+06	2.12003e+06	3.07274e+06	2.795e+06	2.39143e+06	1.54907e+06	3.90633e+06	3.89913e+06	3.89913e+06
M293T341	292.959	340.507								5.33275e+06	6.8004e+06	6.82766e+06	281160	5.94147e+06	8.09043e+06	6.11854e+06	1.20816e+07	8.24115e+06	1.15418e+07	7.86425e+06	1.3664e+07	1.05408e+07	1.05407e+07	1.04926e+07
M785T57	784.582	57.35								617502	662852	874562	1525.06	1936.5	726885	1.31386e+06	118563	34622	140077	803.884	5.60746e+06	92910.3	91162.6	92904.9
M468T38	468.387	38.105								273484	360622	212513	66877.5	352163	429152	313014	560216	468932	449658	328821	517598	512358	500591	500582
M228T35	228.149	35.442								162293	289829	11271.9	290731	52292.4	882541	39182.2	875850	146646	181579	89217.1	263948	258233	245547	245629
M86T264_2	86.0959	264.349								1.97001e+06	1.7019e+06	1.86534e+06	89556.1	1.34439e+06	2.28718e+06	1.27597e+06	3.43501e+06	1.80734e+06	3.29627e+06	1.34068e+06	3.87923e+06	3.39631e+06	3.38223e+06	3.3836e+06
M228T37	228.195	36.822								635418	336933	870120	350662	604887	1.00232e+06	700836	507925	433927	357930	357521	199184	640557	657630	640478
M352T37_2	352.319	36.963								719935	568344	780074	196511	306995	671854	440292	626391	546961	740644	249380	372991	698371	712492	712561
M187T36	187.125	36.107								187997	343760	169533	94355	281486	138885	403190	492113	433131	638820	171551	852714	539192	539307	505432
M120T40	120.08	39.524								134903	22295.7	114932	91141.5	300078	12437.8	328766	237270	362782	298765	1710.71	467415	294005	299197	293982
M177T317	176.875	317.326								4.45516e+06	4.15399e+06	4.39271e+06	439313	4.23953e+06	4.34882e+06	4.54308e+06	4.5238e+06	4.61632e+06	4.32303e+06	4.48485e+06	2.42081e+06	4.38393e+06	4.3843e+06	4.48436e+06
M703T343	702.972	342.629								1.60652e+06	2.35889e+06	2.4957e+06	5282.58	2.01113e+06	3.28274e+06	2.08333e+06	7.23229e+06	3.63825e+06	4.54703e+06	3.14121e+06	4.49866e+06	4.39522e+06	4.60098e+06	4.39167e+06
M733T59	732.553	59.2445								3.27503e+06	2.51954e+06	4.32975e+06	7299.57	7146.84	3.44733e+06	31845.5	594645	14591.7	678696	4862.08	4.81256e+06	456434	452149	460093
M719T41_1	718.57	40.6755								1.68863e+06	1.62144e+06	1.85737e+06	5817.9	5626.84	1.6176e+06	10483.6	705968	7475.8	800662	7640.04	1.47466e+06	684592	660593	684536
M769T40	768.584	40.321								1.10586e+06	1.20302e+06	1.29799e+06	911.231	6614.38	1.23403e+06	125363	455436	20858.4	507311	76071.3	876750	478291	477840	488036
M228T36	228.231	36.245								9253.54	23013.8	853568	14943.9	37611	30296.4	58620.3	63622.3	56531.9	96509.2	21473.7	37117.7	95630.8	84751.3	84958.9
M372T159	372.309	158.519								13060	13221.2	13025.4	13419.5	12376.5	91801.5	11311.5	2.86619e+06	18682.6	3.11506e+06	15995.5	1.35774e+06	2.44552e+06	2.42714e+06	2.43619e+06
M570T40	570.455	39.671								146572	141570	123236	76585.5	444656	183082	371216	436141	493958	383135	347121	380573	409066	409256	398753
M809T40	808.58	40.498								917498	961980	1.03328e+06	3411.71	10149.2	1.16553e+06	341027	432615	27092	537246	9535.75	1.0158e+06	500380	474533	500445
M327T456	327.079	455.752								697536	694331	790135	50080.5	626805	807113	844761	1.09407e+06	978436	1.17343e+06	958656	1.21517e+06	1.01482e+06	1.015e+06	991900
M280T43	280.233	42.55								9028.19	9095.76	5522.68	1373.18	21249.5	16524	11619	11315.5	31891.4	1.07577e+06	19743.6	4540.99	11896.4	11862	12647.5
M170T132	170.08	131.742								434757	551242	610210	226425	469778	713596	564396	2.068e+06	1.53434e+06	1.93537e+06	276654	4.19617e+06	2.15841e+06	2.12637e+06	2.12644e+06
M205T260	205.096	259.568								1.04887e+06	946392	1.17059e+06	458183	576280	1.17742e+06	597035	2.02943e+06	925982	1.86025e+06	775495	2.63002e+06	2.10017e+06	2.10013e+06	2.15183e+06
M244T36_2	244.189	36.254								518244	248546	858514	208460	147247	790035	520201	444788	242633	182721	177940	121828	410027	423513	423406
M429T35_2	429.37	34.81								872422	915370	983932	240867	190416	776461	389323	134677	257072	127633	231260	292974	139158	143766	139290
M260T261	260.052	260.767								344686	335169	425241	14200.2	265206	487174	184882	541646	364525	629275	248894	2.22719e+06	744198	739560	739572
M260T266	260.079	266.351								36668.5	27930	39898.7	16036.1	39333.5	16081.3	56292.7	75838.6	61999.7	49796.3	59243.1	2.40603e+06	123663	266298	268205
M242T309	242.079	308.648								1.97732e+06	1.95649e+06	1.91499e+06	73966.7	1.98007e+06	1.94529e+06	1.59624e+06	1.49761e+06	1.42417e+06	1.56554e+06	1.47774e+06	1.5792e+06	1.6404e+06	1.6389e+06	1.64401e+06
M785T342_1	784.975	342.212								1.35816e+06	2.13873e+06	2.23412e+06	1483.34	1.70251e+06	3.24134e+06	1.88623e+06	4.4263e+06	3.70789e+06	6.06053e+06	3.05208e+06	4.41858e+06	4.85343e+06	4.85616e+06	4.69141e+06
M571T35_1	570.504	35.4025								160684	35649.2	17793.5	70110.5	6006.85	2109.84	16953.4	12889.8	16452.9	5631.64	6125.85	6637.93	413552	400457	398612
M339T39_2	339.288	39.0075								346562	1.42698e+06	467800	223458	665437	297966	437063	213157	894252	168837	893716	365767	208916	218460	218662
M254T38	254.246	38.0405								205003	228256	275441	64083.9	152493	400660	319459	455793	247188	472039	167238	133465	390591	403233	390546
M105T341_2	104.991	340.507								4.60869e+06	5.39815e+06	5.50204e+06	632834	4.75877e+06	6.14693e+06	4.93321e+06	9.89803e+06	6.13424e+06	9.32799e+06	6.08613e+06	1.13121e+07	8.57715e+06	8.57705e+06	8.64347e+06
M226T36	226.179	36.152								426415	221309	680505	199792	149318	713252	433077	372563	287723	169544	145035	132562	399745	405214	405140
M204T323	204.122	323.28								1.06397e+06	1.16951e+06	1.19578e+06	1.54501e+06	859444	1.26961e+06	907594	519532	986630	533253	929541	175209	697690	697702	685095
M164T356	164.028	356.406								555899	425438	629283	37560	485633	848449	420545	1.79068e+06	685829	1.73846e+06	542357	2.92038e+06	1.68758e+06	1.67161e+06	1.67172e+06
M262T478	262.05	478.44								6.35663e+06	4.74829e+06	3.70329e+06	174780	3.302e+06	3.67974e+06	1.8618e+06	3.51602e+06	1.24009e+06	1.20495e+06	1.04804e+06	2.94492e+06	5.03859e+06	5.04807e+06	4.78535e+06
M614T40_2	614.481	40.036								171302	114709	110441	68734.8	307490	153724	290415	360905	409710	329598	267854	293231	338004	338107	334529
M676T35_2	675.674	35.4145								350234	216648	489275	81054.6	55100.2	161400	105487	36147.6	36701.2	64815.8	109612	85495.4	37243.9	37285	39328.3
M690T181	689.557	180.851								1.49078e+06	1.41167e+06	1.34013e+06	163783	173104	830673	380011	91650.5	217835	66188.9	266138	103060	45546.6	46442	46456.1
M761T343	761.013	342.639								1.7429e+06	3.88684e+06	3.93238e+06	247.275	2.80314e+06	4.44758e+06	3.03598e+06	4.26819e+06	4.59644e+06	4.25955e+06	5.13676e+06	5.61399e+06	4.38981e+06	3.71544e+06	4.382e+06
M812T174	811.665	173.732								1.84664e+06	1.8125e+06	1.14231e+06	121492	134865	241516	169015	85541.3	193364	79903.2	239510	126352	31504.5	33744.8	33656.7
M720T143	719.574	142.924								1.96443e+06	2.33176e+06	2.09931e+06	1.01008e+06	735038	1.7458e+06	1.14771e+06	649070	1.11598e+06	628008	1.18164e+06	897000	347532	396297	397037
M785T73	784.581	72.763								482979	578531	529937	1646.07	1540.2	760987	4.84814e+06	79941.9	253362	91030.2	647.363	267318	65925.6	63247.9	65904.1
M375T339	374.961	339.305								3.26356e+06	4.21352e+06	4.29168e+06	144234	3.72401e+06	4.99867e+06	3.78276e+06	7.65103e+06	5.03549e+06	7.14085e+06	4.71923e+06	8.68614e+06	6.68551e+06	6.68554e+06	6.63878e+06
M165T302_2	165.054	301.815								746540	768140	875671	200553	717272	1.0492e+06	628404	1.1951e+06	822990	1.24879e+06	627322	1.5246e+06	1.38734e+06	1.37558e+06	1.3755e+06
M389T35_1	389.266	34.807								446354	376766	494982	107437	284761	475098	421655	695863	519287	763409	323414	392878	761961	749072	749211
M389T36_1	389.339	36.002								58429.6	103655	28409.1	2358.41	32874	71026	71226.1	59745.6	105652	779594	18228.7	12411.8	794317	756371	756504
M794T389	794.294	388.547								758106	541438	455294	765.856	539831	411905	771210	1.40651e+06	755199	176936	352084	884010	911085	906817	911084
M132T52_2	132.043	52.191								150386	155730	167020	101275	764095	328696	374791	373734	348487	416201	283995	234004	316895	292834	292363
M351T341	351	340.522								2.31066e+06	3.16092e+06	3.09593e+06	84962.5	2.69344e+06	3.79276e+06	2.7543e+06	7.43602e+06	3.90855e+06	4.00776e+06	3.74585e+06	8.65799e+06	5.97581e+06	5.95217e+06	6.00345e+06
M496T38	496.418	37.691								288804	247398	240353	55926.8	232294	345618	257633	533249	369545	445475	243091	286476	503056	502920	490390
M793T133_1	792.585	133.351								2.21505e+06	2.55508e+06	2.3935e+06	1.02676e+06	540274	2.24657e+06	808945	397089	573697	372965	601861	703114	247672	266224	267718
M268T234_2	268.104	233.994								931417	854070	1.16669e+06	594327	1.65719e+06	253230	855306	1.89421e+06	300861	2.59782e+06	703813	3.42608e+06	1.50276e+06	1.50277e+06	1.51558e+06
M540T39	540.444	38.7255								175755	218432	137424	61492.4	259331	214847	297040	439638	414144	313375	229417	287609	372251	369550	369504
M426T135	426.356	135.339								11583.4	22198	45043.9	575.902	55.9687	444710	1.27146e+06	5.65875e+06	192.72	9.36457e+06	1.27146e+06	851383	6.01741e+06	6.1026e+06	5.26002e+06
M761T76	760.582	76.5								4.50069e+06	4.63282e+06	7.11759e+06	7347.39	11447.1	3.37808e+06	949918	419070	91635.2	622873	4245.35	1.94349e+06	426683	442461	442860
M134T349	134.018	349.283								1.37223e+06	1.28145e+06	1.53486e+06	44188.9	1.22469e+06	1.83012e+06	1.02026e+06	2.23749e+06	1.59604e+06	2.44699e+06	1.22542e+06	2.56478e+06	2.36496e+06	2.35716e+06	2.36078e+06
M408T36	408.304	36.343								214379	946673	1.29108e+06	148836	350286	210513	850061	898134	528746	743304	636526	550738	564466	705326	705745
M438T37_3	438.377	37.041								258683	228677	216418	53873.7	223922	280578	225114	506624	370869	471833	219067	336045	520463	512646	512652
M504T31	504.322	30.665								358340	251631	172054	40252.3	143323	451702	542715	743981	459345	1.16129e+06	236025	328644	709287	709274	698549
M771T113	770.6	112.584								843462	794051	731366	60674.9	1.26919e+06	500185	795545	41815.3	3.61809e+06	59979.8	1.66016e+06	60241.7	53325	65239.9	54207.1
M110T399	110.07	399.44								7.47599e+06	2.69488e+06	7.9825e+06	2.07667e+06	6.98721e+06	8.32102e+06	2.29345e+06	7.7866e+06	2.43306e+06	9.75009e+06	6.74841e+06	2.84684e+06	9.0594e+06	9.08703e+06	9.05937e+06
M285T337	284.971	337.385								963108	1.27889e+06	1.56782e+06	19156.4	1.17044e+06	1.3914e+06	1.26724e+06	2.38496e+06	1.24599e+06	1.04068e+06	1.2806e+06	3.82261e+06	1.63491e+06	1.42699e+06	1.63806e+06
M271T237	271.074	236.923								714661	823067	342459	3200.76	1927.48	18535.6	224746	495046	17304.5	281467	38266	35167.4	494895	500219	500222
M400T138	400.341	138.175								10975.7	12957.8	13002.4	56298.2	52601.9	39118.7	31982.5	2.59842e+06	52249.6	4.04218e+06	41616	777040	3.33477e+06	3.4506e+06	3.41735e+06
M707T109	706.534	109.322								403087	399044	427639	3326.99	3794.41	598889	1.54987e+06	41252.8	72312.5	114668	3320.91	105169	56486	56494.3	67579.7
M113T427_2	112.999	427.257								512885	506973	387058	51883.4	283560	569946	514672	1.33663e+06	603204	932270	337360	1.68042e+06	1.02482e+06	1.02486e+06	1.00414e+06
M799T34	798.584	33.903								454877	343583	453653	69503.6	99400.4	347498	314139	373992	112970	307060	99341.6	136030	430345	418200	430513
M496T178	496.337	178.439								186051	24950.8	101142	1082.41	51143.4	256165	12477.8	1.94321e+06	192599	1.51726e+06	85617.3	717554	1.63702e+06	1.61867e+06	1.61867e+06
M532T31	532.353	30.652								306727	227169	135106	43797.3	213605	403986	611403	596910	509399	910917	299123	395604	626546	620472	626519
M556T39_2	556.438	39.395								103800	100766	80390.4	55695.3	306190	129547	241601	284283	345274	279983	271555	315673	301323	293688	295123
M512T39	512.415	39.1785								161572	57882.1	3344.26	66050.1	401190	178971	300910	378447	54917.3	320298	331903	395939	327360	320208	324407
M328T494_2	328.098	493.543								350386	186662	274446	46516	185661	232813	284705	577093	406977	611363	304412	732873	559508	559518	564192
M767T135	766.569	134.876								1.75844e+06	1.94578e+06	1.76336e+06	760466	510736	1.79276e+06	713053	301026	585115	300984	578765	539904	300765	328153	331227
M146T236	146.026	235.623								462285	434376	423157	81612.5	302408	79518.5	849472	1.55414e+06	269645	1.48793e+06	231172	1.86827e+06	1.04438e+06	1.04438e+06	1.04161e+06
M544T348	544.031	347.893								262245	266724	349446	92.3749	254295	458930	214315	1.04434e+06	452669	1.02168e+06	327120	1.52805e+06	966178	956100	966273
M709T33	708.509	33.16								810857	748626	753892	310430	282330	903490	508484	161113	351881	156600	288716	300469	120755	117853	122133
M515T389	515.21	388.532								719417	494766	484060	7409.6	478873	430243	629341	1.26694e+06	742265	239762	333282	892588	879263	863963	863895
M475T29_2	475.296	29.389								583573	468557	442458	47681.4	235638	545516	430075	834285	532589	743626	162386	161304	734549	685765	685767
M246T523	246.181	522.553								1.13494e+06	1.44274e+06	1.09321e+06	239458	1.27916e+06	1.46667e+06	1.1588e+06	2.71739e+06	1.70832e+06	2.55507e+06	930105	2.73592e+06	2.54092e+06	2.46724e+06	2.52854e+06
M507T36_1	507.269	36.112								238561	207657	242277	79682	56669.7	207055	209931	170311	112194	494883	575979	55555.2	432212	432262	422629
M281T38	281.137	37.853								273264	197496	363110	97722.1	348562	403377	329320	412482	408611	441943	311412	544175	465537	465556	443073
M227T342	226.987	341.685								7.07706e+06	8.80805e+06	9.10231e+06	619032	8.23143e+06	7.98083e+06	8.59133e+06	7.80231e+06	7.5206e+06	6.90951e+06	8.87381e+06	1.00458e+07	6.12779e+06	5.53217e+06	6.13227e+06
M263T307	262.948	307.189								368766	448632	440717	26457.4	387117	641204	442383	810517	583067	949812	422036	1.19767e+06	809019	803854	803833
M242T281	242.099	281.497								874054	828288	816727	103543	840962	910442	867321	23378.4	985668	52844	813600	41506.9	419386	449635	450504
M337T36_1	337.199	36.343								187585	210856	144524	33615.5	79623.9	186552	187191	201701	198760	540172	465646	58583.3	364472	364426	340136
M731T41	730.534	40.675								582813	603199	704481	6801.41	7551.8	910241	16086.2	553270	15403.4	479014	11837.1	862828	471568	471565	473635
M137T370	137.07	369.567								665724	1.58889e+06	1.84177e+06	400706	1.60632e+06	1.47523e+06	2.49234e+06	5.74211e+06	3.42687e+06	6.7443e+06	2.59991e+06	5.50723e+06	3.58256e+06	3.61546e+06	3.57612e+06
M199T37	199.179	37.415								137207	198902	15020.2	29709	116296	98096	230270	337144	261897	235284	109679	385987	287132	287197	273595
M600T40	600.465	40.169								99798.9	144050	62816	51616.2	249117	116303	213441	285811	329965	249131	220017	290025	278572	270599	278807
M301T276	301.142	275.783								2.10239e+06	2.16855e+06	2.42438e+06	78442.5	1.90571e+06	1.60211e+06	984033	1.15334e+06	1.35181e+06	1.06405e+06	905330	460617	2.29184e+06	2.00742e+06	2.29831e+06
M372T504_1	371.604	504.092								83516.9	80927.7	141324	25682	90141.6	129025	177484	455606	260161	479924	155327	586816	347250	347255	355438
M732T143	731.538	143.186								792879	807899	907230	454464	351594	1.15968e+06	1.01224e+06	388938	521719	295921	550971	337456	219763	230030	224662
M680T147	679.506	147.146								690324	711691	827783	230445	186575	671229	421062	118300	142419	94057.4	195170	126657	65665.3	72128.6	66287.6
M815T137	814.626	137.207								1.99902e+06	1.91056e+06	1.68417e+06	580921	555897	798749	426404	382771	322478	369217	567519	506125	199167	212235	212645
M138T442_2	138.054	441.737								643010	556393	651954	135642	595453	692391	456192	832893	610292	742892	456028	871159	768254	767976	752810
M222T261	222.096	260.805								656122	666979	1.04198e+06	14642.5	691060	1.13233e+06	465038	1.2395e+06	646348	2.00963e+06	643762	1.87984e+06	1.53856e+06	1.52183e+06	1.53868e+06
M186T442	186.075	441.934								759532	634242	753234	153608	683232	758944	508882	928558	676752	889356	514965	942124	900035	899685	877354
M110T414	110.07	413.769								3.53188e+06	2.93496e+06	3.60654e+06	1.30717e+06	3.24766e+06	3.64184e+06	2.67861e+06	5.6551e+06	4.01854e+06	3.7679e+06	3.04382e+06	2.37389e+06	4.11823e+06	4.0549e+06	4.11941e+06
M659T40	658.507	39.912								128403	65520.4	102031	49604	228432	113054	211390	255544	274279	203537	184891	233153	258790	252161	252190
M781T139	780.549	138.507								1.4805e+06	1.57018e+06	1.91493e+06	871333	1.85525e+06	2.17005e+06	1.71987e+06	821581	1.11468e+06	871077	1.00721e+06	1.02791e+06	617834	730069	732110
M625T442	625.113	441.928								740022	704570	736464	178466	630859	814799	558896	1.01069e+06	752487	984711	557460	1.12129e+06	1.01759e+06	1.02652e+06	1.0176e+06
M388T313	387.935	313.485								544100	465556	560689	1082.51	376476	663493	473959	1.23743e+06	841843	1.51668e+06	488118	1.59889e+06	1.24643e+06	1.24627e+06	1.2544e+06
M304T85	304.284	85.074								2.67265e+06	1.83242e+06	2.3606e+06	438788	2.4602e+06	1.65978e+06	1.1617e+06	2.00116e+06	1.65147e+06	1.99506e+06	1.85427e+06	609329	1.25182e+06	1.25212e+06	1.26964e+06
M359T37_2	359.314	36.6305								305948	293376	392587	116690	76588.3	310480	220990	80203.1	78443.2	91143.2	111065	108377	109180	109398	115110
M679T122	678.504	122.036								75847.6	57623.1	86226.8	266796	198216	109157	724152	44240.9	487819	27225.5	358716	41940	34282.5	34287.3	36483.5
M487T34	487.296	34.195								249769	235464	180599	45302.6	109144	319829	369354	464849	300137	829359	467290	185515	302782	313554	302570
M392T501	392.117	501.079								81630.2	61041.3	124495	12893.1	49643	82804	161027	371182	198039	445532	140325	508063	330669	330697	322000
M194T308	193.997	307.666								534041	512955	569722	7049.77	448762	654858	427869	995529	596655	856523	538926	1.23075e+06	844287	844369	828095
M706T145	705.523	144.75								628517	621740	782404	294775	197646	765173	637957	213332	745788	154297	319085	186998	113598	133237	113539
M783T95	782.565	94.7425								289222	299509	290561	783.739	1658.91	261895	2.48476e+06	46327.5	2.11376e+06	76431.4	4645.89	73516	60711.1	52417.3	59132.2
M424T37_2	424.361	37.231								269964	194276	198697	49411.9	219611	226581	186375	431577	330915	411683	217795	364509	391635	399812	399760
M331T37_2	331.282	37.365								343165	329887	421577	153012	143405	373755	348217	336669	151496	322973	205993	184249	369675	374958	375054
M452T37_2	452.393	36.777								248668	224277	213490	39091.5	166367	232060	246763	423636	275269	342806	165899	209396	399359	395242	395213
M452T35	452.335	34.817								187130	188230	235026	97207.4	268993	228946	288559	394983	349224	415060	283324	326043	441524	437080	437961
M462T348	462.028	347.893								263844	270543	337239	374.362	256707	456619	217305	873436	438670	887269	317872	1.21409e+06	850796	843531	845449
M283T36	283.281	36.311								395786	177623	196763	109207	70474.2	191140	286392	154658	96358.9	344945	88375.9	102646	284412	292400	280472
M601T34	600.513	34.185								13589.7	18685.4	16149.2	3115.23	31618.1	14560	4614.62	5549.43	21367.8	351.964	5296.84	4313.41	29555.1	20973.2	10579.6
M704T153	703.571	152.645								996479	1.07867e+06	1.16149e+06	5362.06	2276.44	1.40161e+06	3816.84	215940	8927.14	348702	4117.74	1.69363e+06	188607	227931	226043
M393T289	392.905	288.697								2280.25	82902.3	100152	4645.65	114910	377387	106864	1.62886e+06	821563	1.87974e+06	405779	1.56974e+06	1.66492e+06	1.52549e+06	1.6643e+06
M217T37_1	217.106	36.785								251874	165869	108831	134780	219460	188991	160175	225790	418717	135234	314842	611833	279797	277585	394325
M747T55	746.599	55.219								2.16963e+06	1.991e+06	2.03809e+06	8930.58	5054.08	975910	125670	241415	20549.1	330909	9271.86	2.52387e+06	210802	210570	214413
M722T143	721.586	143.327								717215	1.11976e+06	652577	257618	201622	361809	316493	180860	230937	172172	420366	340508	83332.6	83211.3	87444.7
M171T37	171.1	36.943								47267.3	73973.5	34362.2	373257	65052.7	69533	94313.9	138168	151943	129734	120661	42111.5	93692.5	89799.1	89583.9
M286T37	286.273	37.203								271240	290549	322369	84531.8	232285	429474	316383	533124	273442	413454	159508	128734	444270	444181	439520
M743T141_1	742.57	141.012								1.71339e+06	1.78679e+06	2.04703e+06	782650	573721	1.84487e+06	886154	431203	792639	409294	759416	623744	273952	295070	277961
M568T343	567.988	343.123								540140	854760	892099	370.051	663745	1.28212e+06	680153	3.38474e+06	1.41134e+06	2.75528e+06	1.1826e+06	4.04641e+06	2.11232e+06	2.11197e+06	2.25342e+06
M258T282	258.071	281.516								146285	141643	123430	21188.3	121804	152338	114487	277652	312535	393351	202662	420694	540793	560189	540813
M244T115	244.19	115.237								2.71495e+06	1.66902e+06	1.78825e+06	140692	1.35789e+06	1.5924e+06	655791	2.55324e+06	1.07107e+06	2.09686e+06	957150	1.55132e+06	1.86459e+06	1.874e+06	1.87401e+06
M280T37	280.262	37.437								410347	240930	291038	147666	229397	226066	362090	442834	254693	549201	213990	253337	515864	499246	499476
M781T41_1	780.55	40.676								477802	484014	569708	6925.56	13967.6	747088	92701	412818	28029.5	364166	14895	546619	373765	373782	378355
M644T40	644.492	40.036								61362	58347.9	35161.4	41370.9	194909	112203	183007	217632	207384	191517	180347	224306	213602	208559	213921
M772T137	771.604	136.615								1.98117e+06	2.06258e+06	2.09618e+06	842158	587813	1.62719e+06	751681	496653	794929	467541	797200	671341	270164	310913	310962
M304T489	304.065	489.315								248918	177739	172138	29455.6	138764	183243	162542	432755	256828	413825	172864	537420	383356	379933	383340
M120T276	120.079	275.567								1.42853e+06	1.36096e+06	1.52736e+06	549513	1.62265e+06	1.44965e+06	1.1029e+06	710236	1.23378e+06	1.1703e+06	1.21785e+06	578465	1.05686e+06	1.04046e+06	1.05686e+06
M584T39	584.47	39.3805								102874	206489	83489	45173.2	226975	113759	193251	264456	300688	234625	213993	192270	240038	236946	236933
M104T389	104.106	388.584								1.09673e+06	1.03091e+06	1.05549e+06	178144	992338	887989	1.06705e+06	1.53955e+06	1.18023e+06	762232	771945	1.35276e+06	1.3394e+06	1.33986e+06	1.30123e+06
M265T240	265.121	239.748								360027	90178.6	16021	16249.4	105897	60088.1	143046	797960	234171	301943	16235.3	258282	178015	180141	177263
M256T329	256.081	328.606								273451	250061	943111	329410	1.21514e+06	1.1216e+06	401415	2260.03	317142	56353.7	378360	57.7221	123264	125858	123324
M401T39	401.301	39.073								13851.1	13657.3	1339.2	314629	17147.7	11660.6	30889.9	30104.8	76742.6	17078.5	12834.5	7263.74	431077	445096	437334
M296T38_3	296.257	38.105								157861	160683	177021	72790.3	224852	227794	197435	229961	235541	272134	159617	307285	332302	326915	326897
M99T289_1	98.9749	289.425								2.89408e+06	2.35698e+06	2.21968e+06	3.04664e+06	2.02816e+06	1.56917e+06	3.28814e+06	1.50161e+06	1.16974e+06	1.20124e+06	1.14433e+06	1.59661e+06	1.61685e+06	1.47004e+06	1.4766e+06
M330T58	330.335	57.9565								942416	820198	1.03553e+06	377965	205796	1.01589e+06	657540	255363	109601	166016	88301	48682.5	326446	309551	308851
M243T239	243.139	239.293								195142	116850	18863.3	12743.3	90524.8	104591	145154	710957	259610	376252	51659.5	398320	140319	137782	141378
M156T279	156.041	279.175								23946	30678.9	25615.9	8197.32	25522	98053.9	24504.5	1.2085e+06	43049.8	699242	23163.2	934210	415976	405200	405136
M1195T33	1194.81	32.891								497853	76469.4	86511.3	9511.98	21189	158691	78676.5	15844.8	9895.22	55892.3	16573.8	22255.2	17098.9	17846.7	17820
M628T40_2	628.495	39.8575								79388.1	60800.6	100920	35197.1	163480	71335	159861	204235	256527	155427	149543	120190	201922	198608	201934
M520T29_2	520.354	29.372								334981	296027	332392	18007.6	193890	339667	300811	456101	387698	445334	151777	137555	451443	451444	446618
M260T240	260.166	239.899								184138	126413	22974.1	7013.92	82777.6	93600.7	124529	696804	236474	309791	57562.8	378194	137899	134066	134071
M251T40	251.102	40.321								8714.73	2612.21	27473.2	108829	360703	74067.3	91102.2	49109.5	59174.8	19167.6	81596.6	111669	63710.4	63249.6	63246.9
M759T181	758.566	180.727								79812.6	1.37483e+06	200861	20193.3	1.86689e+06	80008.3	86457	340194	997343	98663.7	957646	55586	119915	273950	264454
M807T40_1	806.565	40.498								367405	326334	420450	9450.85	16751	516448	179155	231630	25975.7	238545	19822.1	460476	242754	253841	253800
M257T289	256.964	288.681								1.73575e+06	1.74984e+06	1.70841e+06	3.04732e+06	2.13814e+06	1.0478e+06	2.24225e+06	1.00169e+06	739842	775190	625479	1.08438e+06	597278	565286	566210
M755T142	754.533	141.555								787468	858697	1.0868e+06	569762	561066	1.15862e+06	1.20672e+06	576338	806909	491089	752151	175804	424026	444969	444957
M645T340_1	644.93	339.564								1.38323e+06	1.89802e+06	1.86654e+06	15617.6	1.64017e+06	2.1997e+06	1.68592e+06	3.14382e+06	2.25723e+06	2.91073e+06	2.14279e+06	3.36119e+06	2.83839e+06	2.82348e+06	2.82344e+06
M529T312_1	528.846	312.199								327647	312468	344336	473.599	238270	486917	323142	1.39504e+06	695755	1.37621e+06	348655	1.59617e+06	1.08639e+06	1.07766e+06	1.0864e+06
M727T340	726.933	339.564								1.05853e+06	1.54006e+06	1.56461e+06	6606.91	1.35107e+06	1.84785e+06	1.35935e+06	2.82305e+06	1.92834e+06	2.6578e+06	1.87809e+06	3.19546e+06	2.47428e+06	2.48131e+06	2.48132e+06
M328T355	328.034	354.699								29851.5	41495.4	49603.6	427.903	30831.1	83603	28082.1	457924	92277.8	421852	57708	847983	368464	365292	365299
M627T312_1	626.823	311.997								238702	224020	254426	266.521	170058	361159	250565	1.21776e+06	557297	1.17215e+06	270150	1.47006e+06	919939	911375	919917
M626T348_1	626.034	347.893								133445	147256	180951	49.3586	137305	246237	100778	624003	248668	590992	180010	931578	585803	534283	585845
M703T41_1	702.535	40.615								279180	189027	98994.2	36035.7	164469	198409	155738	205362	205273	202965	143413	311350	241847	236472	236537
M296T390	296.065	390.32								1.35319e+06	1.18679e+06	1.30121e+06	259094	1.09012e+06	1.24743e+06	1.50338e+06	2.00941e+06	1.55864e+06	1.07403e+06	967759	1.84489e+06	1.68716e+06	1.61433e+06	1.68664e+06
M790T139_1	789.611	139.162								1.37716e+06	1.60229e+06	1.26515e+06	513838	450846	701408	456300	337030	590798	346544	557333	467741	192142	201444	201686
M430T34_2	430.374	34.203								390372	387854	417798	98193.8	71609.5	329758	142528	73851.9	92763.2	44133.8	97400.7	126445	51938.8	52783.2	51935.3
M742T504	742.199	504.092								52428.5	45370.7	82639.2	13789.2	51894.9	77914.7	104505	292985	148313	303880	89670.4	395607	222151	222168	224388
M527T39	527.433	38.736								69888.1	101517	66142	31394	156681	102183	147758	185297	142711	150433	143245	184810	162354	158538	158481
M207T272	207.206	271.531								148393	133584	157155	6431.35	127380	183576	81257.3	356066	91954.5	149955	82957	896731	113375	118171	113479
M290T314	289.959	313.835								518666	438658	527061	827.031	373657	614961	430617	1.03855e+06	722750	1.21685e+06	444439	1.28585e+06	1.03665e+06	1.02566e+06	1.03664e+06
M422T35_2	422.32	35.437								160058	172329	194786	53276.8	144060	188675	61506.3	217363	259589	288382	182404	258193	329379	337208	329379
M689T40_1	688.518	40.321								172237	172467	160113	34144	143073	164943	140793	232909	187684	178591	149973	308015	218649	215088	215126
M609T343_1	608.989	342.866								270214	493604	523855	788233	385460	807229	444364	1.71016e+06	970947	2.1285e+06	797114	1.92394e+06	1.50096e+06	1.59523e+06	1.59432e+06
M155T157_2	155.153	156.875								239185	268181	286553	38705.5	290855	432334	279855	576108	307680	460766	258176	836214	552915	540007	539977
M637T34_2	637.302	34.167								147308	108149	152112	31038.4	91293.1	172154	129867	286189	352551	294231	96281.5	64931.8	263346	257562	257524
M580T342	579.968	342.214								519345	866093	832509	768.496	680854	1.15266e+06	739131	1.70973e+06	1.34327e+06	1.56649e+06	1.1537e+06	1.38634e+06	1.60345e+06	1.67466e+06	1.60649e+06
M156T464	156.076	463.51								3.58026e+06	2.04452e+06	2.28504e+06	835653	2.05905e+06	2.38723e+06	1.48651e+06	1.30589e+06	3.95954e+06	2.17537e+06	3.35527e+06	2.1761e+06	2.4531e+06	2.44475e+06	2.44472e+06
M308T426_2	308.09	426.491								872551	1.51775e+06	308266	29431.2	141441	151638	378521	243289	91585.6	78863.9	574175	109752	131432	134259	134235
M206T310	205.96	309.665								259931	244755	256384	10970	232730	306267	264404	600970	390721	550838	287696	786107	512009	506422	506460
M492T29_2	492.322	29.372								284382	205420	221369	29050.8	120092	248750	203158	453450	267057	338715	90941.6	84824.4	354962	350576	354974
M302T41_2	302.303	40.719								147564	131376	192006	2656.79	262956	239818	876575	423726	477179	335376	79883.7	160500	468764	470332	470332
M424T171	424.34	170.832								685578	677821	620828	122582	361113	801295	588299	760997	799500	811492	534930	50933.1	660911	660922	648299
M329T494_1	328.596	493.582								191895	96860.1	146008	23287.4	89608.6	119418	150171	289811	220928	327613	160111	400390	296507	294431	296501
M717T41	716.551	40.527								523792	325690	397790	19653.3	89931	412447	87221.8	269324	117816	307431	86146.1	357686	250262	250135	254721
M156T448	156.076	448.18								801862	778813	960144	414600	842508	1.01908e+06	676245	743247	670588	908698	707760	953711	918494	913467	918503
M123T38	123.079	38.262								138995	240351	52609.3	45935.7	311796	189882	363230	336378	607017	154056	232856	123318	84832	82731.4	82762
M949T342	948.979	341.997								328336	537287	564065	37.643	428884	802421	442650	2.33266e+06	971951	1.98204e+06	805239	1.63112e+06	1.24756e+06	1.24221e+06	1.42194e+06
M123T443	123.054	443.175								670937	658448	645890	250332	635875	725155	549106	824425	719042	955030	601722	1.01362e+06	902934	892060	892106
M650T344	649.991	343.783								370765	572961	621034	116.954	452079	903132	444872	1.86398e+06	1.09284e+06	1.75606e+06	828340	2.00837e+06	1.75662e+06	1.79047e+06	1.79187e+06
M168T95	168.065	95.3455								346909	337463	369609	42874.9	642570	730558	365580	2.142e+06	1.15393e+06	2.48776e+06	1.14527e+06	1.3555e+06	2.06537e+06	2.03754e+06	2.01573e+06
M299T157	299.304	157.19								347567	33541.1	7288.72	1934.88	7654.99	4985.07	117170	68532.1	4835.14	4809.78	1905.64	10457	84930.2	86383.7	85006.4
M440T35	440.406	35.437								257959	296011	229562	50170.3	61405.8	321183	174264	122927	69326.3	66376.5	73733.6	102219	48428.6	50056.1	50022.5
M266T116	266.172	116.078								1.40393e+06	894816	838261	120483	718898	921749	202255	1.92718e+06	215641	1.5653e+06	470197	1.00665e+06	1.54403e+06	1.56605e+06	1.55625e+06
M298T35_2	298.309	34.817								41343.6	49576.4	46779.1	20399.2	115417	72193.7	60152.6	186741	25231	45985.4	13361.3	13296.4	44569.6	41495.2	47925.4
M719T105	718.569	104.54								299185	945200	1.30112e+06	1737.93	10706.3	404516	3.39103e+06	42165	1.26361e+06	81117.8	19253.4	137087	56126.3	56117.3	54270.8
M729T145	728.518	145.291								589180	689153	631451	363715	223154	646868	474311	212689	234526	193024	328284	241468	127742	132506	132720
M498T341_1	497.965	341.185								579436	909871	902508	2440.13	741261	1.18845e+06	800530	2.22942e+06	1.26965e+06	2.00786e+06	1.22395e+06	2.41304e+06	1.41847e+06	1.54664e+06	1.41752e+06
M331T459	331.044	458.886								1950.71	1184.53	3633.09	4316.05	3994.82	437.138	9367.95	3396.7	880.529	1628.53	522953	1449.53	33507.2	34636	33504.6
M99T230	98.9752	229.508								3.43632e+06	5.37838e+06	3.29869e+06	9.2051e+06	5.73101e+06	2.80609e+06	5.29562e+06	1.41357e+06	2.98849e+06	1.97434e+06	5.10219e+06	1.32011e+06	890320	882599	862691
M332T59	332.315	59.143								821011	617149	875922	209007	693467	515517	516960	1.44369e+06	1.1041e+06	528569	670332	118060	556678	483482	557215
M170T151	170.081	151.087								116230	110848	161430	38173.6	1.22138e+06	972634	181920	335790	286241	362634	201761	322322	283096	277574	318644
M809T339	808.936	339.39								994455	1.56105e+06	1.44663e+06	2563.82	1.23432e+06	1.82268e+06	1.29305e+06	3.04451e+06	1.86618e+06	2.63028e+06	1.83888e+06	3.4119e+06	2.12309e+06	1.98345e+06	2.12286e+06
M369T257	369.111	257.159								472000	429948	521547	11617.1	421512	584304	322829	777506	527620	782303	351560	996927	781075	781217	773928
M527T342_2	526.986	341.997								332722	565251	622530	27.7114	449731	844567	477745	1.38964e+06	963080	1.44144e+06	847722	1.50751e+06	1.43139e+06	1.39004e+06	1.42472e+06
M130T77	130.064	76.9945								100497	577040	729547	75907	120011	220683	897124	1.53001e+06	1.6129e+06	170961	79153.2	1.96917e+06	1.63746e+06	1.63738e+06	1.59678e+06
M258T448	258.109	447.51								132465	210665	244953	34817.1	246300	1.30523e+06	156389	197122	298656	61551.8	191800	132612	266725	275941	266136
M191T109	191.022	108.874								498842	493516	602292	936584	452040	584087	294616	781798	284665	304267	480638	931636	647229	622705	620867
M188T297	188.073	296.699								801989	1.04575e+06	1.22179e+06	171665	782835	1.37e+06	298605	903148	566748	1.04768e+06	527967	1.17662e+06	1.16716e+06	1.16291e+06	1.16718e+06
M814T137	813.616	137.297								1.09697e+06	1.19982e+06	1.15273e+06	444081	299793	778481	333186	246051	429632	246745	405502	347308	144874	157957	146588
M230T277	230.069	277.043								2.6299e+06	2.57137e+06	2.84964e+06	865805	2.73975e+06	1.83438e+06	2.46982e+06	1.41715e+06	2.47778e+06	961359	1.50791e+06	604758	1.30362e+06	1.22771e+06	1.25868e+06
M246T111	246.151	110.675								993598	1.09669e+06	1.29906e+06	170170	1.56116e+06	1.26962e+06	815106	1.55838e+06	496663	845396	1.72416e+06	587937	667450	667459	701188
M166T275	166.085	275.322								730958	774782	814512	246433	995010	767389	529587	367683	644198	615013	632037	292506	539359	551500	552561
M571T39	571.458	39.285								18003	58432.2	54669.7	23003.4	119407	39546.5	124770	150237	171365	69047.8	105313	126192	129243	125633	125655
M113T306_2	112.999	306.479								451369	418996	418843	128787	291597	409813	358339	230356	291334	352447	279441	257800	342387	339896	341214
M737T148	736.572	147.94								854257	935880	560007	47301.6	157285	356819	257116	138899	239720	138008	279490	208915	73429.8	75208.1	75179.4
M337T37_2	337.327	36.86								179166	179745	226905	59571.4	72842.9	167180	117921	168249	260780	186332	67801.2	93295.1	187794	196658	187858
M691T343	690.992	342.533								173164	304709	358175	20.2173	249023	507083	262650	1.81304e+06	658811	1.01284e+06	525774	1.50327e+06	965091	970047	965121
M312T113	312.361	113.181								610797	272934	133804	127852	26452.6	220933	185806	27606.7	51732.4	14756.3	24486.7	12984.3	36209.2	39461.7	36862.5
M707T55	706.535	55.1595								1.40625e+06	1.23968e+06	1.0749e+06	3263.55	6420.66	750765	5646.3	179753	7517.13	221946	5395.8	2.00965e+06	132033	131904	135531
M426T439	426.046	439.085								630639	579213	543527	310212	487719	541734	276511	530129	491993	620259	382476	883441	731925	751166	732013
M732T344	731.995	343.936								202614	344101	351961	71.9659	254428	557052	260617	1.30862e+06	657115	1.48239e+06	476323	1.43448e+06	1.13689e+06	1.10948e+06	1.11085e+06
M453T37_1	453.166	37.437								161163	120668	214050	183569	158102	180590	191439	144641	177958	116956	76601	157167	204001	211508	203939
M309T296	309.137	295.894								747283	948154	1.01545e+06	135128	757546	1.33549e+06	273043	721175	521139	956025	496864	1.08576e+06	1.10015e+06	1.09296e+06	1.1003e+06
M355T74	355.062	74.449								651064	640960	1.25921e+06	228541	1.19698e+06	1.83221e+06	1.08412e+06	2.11979e+06	904146	1.12136e+06	1.61067e+06	1.70188e+06	1.50118e+06	1.49891e+06	1.64227e+06
M662T342_1	661.971	342.341								394074	623264	616729	223.476	495482	925998	542981	2.1966e+06	1.07497e+06	1.87795e+06	873346	2.59669e+06	1.64784e+06	1.64179e+06	1.64782e+06
M717T138	716.555	138.244								1.08352e+06	1.13259e+06	1.13342e+06	503228	337991	1.00236e+06	1.19198e+06	301030	481287	301713	489536	372942	173066	180276	180415
M145T332	144.927	331.802								264702	259994	272279	26494.5	205124	287004	231301	590040	274165	673231	229400	790774	567501	568003	526002
M284T264	284.098	263.73								99387.5	131874	203198	5467.72	108492	249343	88936.3	423765	155894	691581	113490	729499	453010	444867	444888
M337T37_1	337.309	36.929								13595	245820	13491.4	1742.44	20034.5	29783.7	48521.3	21134.6	60499.6	21476.1	199294	12828.1	229984	237928	230070
M243T506_1	242.642	505.825								411164	402307	403801	91825.8	356712	485849	299033	693534	442289	637688	315918	893396	689939	679756	689953
M150T132	150.054	131.673								306059	173671	327010	58759.8	81545.9	399490	317182	1.21291e+06	500803	1.49725e+06	72401.7	2.34913e+06	881722	1.05765e+06	1.05318e+06
M102T405_2	102.054	405.347								408374	372210	387715	85457	343936	418185	373071	577733	440556	579266	408575	666918	568862	568903	563883
M284T84	284.33	83.614								70934.6	49896	48148.7	16256	22300.4	85922.6	28337.3	1.92395e+06	27883.8	1.59055e+06	31344.7	35988.9	74599	74375.6	54547.7
M221T276	221.185	275.827								127033	110374	160587	828.507	74278.7	214704	68012.9	651592	177368	902285	73970.2	511016	523528	510455	510699
M161T324	160.9	324.031								226717	117982	220761	101784	62490.7	107470	116816	267787	220610	244819	199731	411317	230308	234808	234794
M136T92_2	136.061	92.158								2.1368e+06	2.06456e+06	2.27057e+06	246781	1.42421e+06	2.5069e+06	996570	1.25183e+06	1.28869e+06	1.44388e+06	1.40672e+06	1.30111e+06	1.31949e+06	1.31374e+06	1.35914e+06
M635T497	635.139	497.168								255787	248549	303812	66993.6	280905	320265	404965	397815	436971	363311	388387	333495	345289	338506	338712
M494T194	494.322	194.233								663816	301460	621883	47791.5	260386	548215	526235	730692	514706	619188	286939	306671	626134	630111	626198
M744T342_1	743.974	342.253								238920	400848	439818	20.2892	323767	587252	328950	1.74335e+06	715224	1.03743e+06	603231	1.22518e+06	1.2441e+06	1.24409e+06	1.27503e+06
M764T141_2	763.591	141.1								948243	921364	1.13218e+06	429749	337574	638326	401548	292940	509269	331909	460884	394500	145969	151801	151970
M285T115	285.333	114.758								179978	107540	80542.7	230364	13984.1	101947	103226	1.11995e+06	22394.9	903506	118806	14172.3	53927.3	54691.8	54695.4
M185T39	185.114	38.735								55068	31281.1	94409.9	83997.4	251941	63270.7	172080	176275	262150	110403	258526	175645	99998.5	102698	95832.4
M209T36_1	209.152	36.343								215110	110904	234253	70846.5	87317.4	259791	200179	212676	186186	100185	86086.2	67223.1	178704	179213	177239
M775T140	774.598	139.886								1.01908e+06	1.13604e+06	1.05473e+06	356258	370019	652809	433098	331511	524716	265297	518885	425901	162345	169963	166466
M135T38	135.079	37.601								115045	98014.5	159848	44642.1	147016	169761	154985	193770	152081	189541	130089	226960	207144	207166	199991
M334T453_1	333.555	453.445								221692	187726	193960	73916	180748	235885	190660	364681	290557	445733	194327	400275	445831	433500	431639
M326T37_2	326.303	37.365								126664	110186	161523	37234.4	39234.3	154532	118422	132505	72485.3	155339	46536.5	39069.7	147000	144753	144749
M291T92_2	291.272	92.414								1.35299e+06	1.25631e+06	1.22909e+06	293753	1.14615e+06	1.22442e+06	1.12807e+06	1.59056e+06	1.64076e+06	1.36944e+06	961464	361344	1.2216e+06	1.20995e+06	1.20998e+06
M319T65	319.302	64.634								219902	225657	239380	55777	129528	224926	443167	543333	407491	606246	624332	108830	311759	311565	366520
M204T261	204.086	260.801								298063	328798	506858	24144.2	347802	561175	240103	582126	326732	984148	345098	928842	714380	706832	706845
M470T36_1	470.199	36.116								36891.8	35965.3	67693.3	256192	99246.4	31117.6	73378.6	25436	102404	35410.7	66637.6	22092.3	143995	148398	144073
M821T134	820.616	134.267								741875	793106	728005	284348	145880	573263	183616	118263	164470	101189	157438	138185	65884.4	70456.3	66364.6
M673T40	672.522	40.2335								61005.1	43899.3	71037.4	29735.3	136125	59532.7	131087	153589	156679	150443	113634	142098	154690	150030	154780
M424T35_1	424.303	34.682								123924	106595	130319	22552.4	85057.8	95573	136164	234998	117323	228106	95664.6	100020	192284	187764	187860
M99T153	98.9745	153.167								507025	625390	582059	2.58087e+06	440024	512730	741821	403053	607429	535365	635568	367508	625582	605576	606227
M353T37_1	353.193	37.203								142372	113645	145977	37515.6	87025.1	169507	199079	208061	208240	195251	68414.3	43472.6	209634	206220	206421
M353T38	353.231	38.016								5662.98	11756.8	22475.1	321.232	15818.8	22059.6	14502.9	8934.63	18808	11984.5	7949.28	7035.23	15731.3	10750.9	23423.2
M310T36_3	310.309	35.841								215145	165966	233158	79177.4	67527	170523	214030	188913	93690.9	269477	88324	59134.3	200800	204082	203504
M331T183	331.203	182.613								165832	158508	159162	6088.85	322679	226347	248857	268472	178873	407858	169916	134367	291002	290947	277114
M264T257	264.053	257.434								528928	544814	586196	33376.4	586718	593812	548094	650867	609940	603343	591427	683585	605238	595874	596094
M584T313	583.888	313.485								214855	178178	220800	197.418	134583	278249	188531	596645	351887	727631	196419	774049	601546	594646	598536
M798T136	797.618	135.866								831554	858751	809723	314443	247294	564153	181160	140145	250660	153727	212077	167641	79153.2	89459.9	79867.9
M258T307	257.992	307.189								494059	407411	484947	31014.8	395695	532149	363305	749884	534587	724203	410393	923414	707590	716409	716429
M809T60	808.578	59.7595								53692.1	155304	175499	2790.76	1124.07	131427	2.04788e+06	34117.3	216812	40511.3	725.596	178393	33238	32532.7	33221.5
M626T342	625.98	342.125								2557.81	10886.8	5416.74	62.1127	7042.56	18195.4	5765.49	427225	16817.5	26403.7	9364.73	40418.5	32631.4	33319.7	31847.7
M431T35_1	431.383	35.413								246812	264534	314492	187946	80014.6	271083	214647	144397	143615	56605.6	88194.6	78506.7	92305.6	90308.7	92315.3
M423T452	423.077	452.168								176596	76260.1	36831.7	639.044	31280.8	27370.8	42051.6	325685	164109	66488	52035.2	127054	215751	212488	215740
M246T68	246.241	68.2								445174	462813	558634	105364	251573	498032	368665	652052	375949	656244	345336	251679	554909	546733	554891
M756T143	755.536	143.186								454599	359594	464408	290756	256318	541414	700418	273436	582667	203599	400711	249059	191928	207081	207659
M322T349	321.985	349.471								469669	444334	535388	10337.7	448437	615130	354831	734533	540412	751945	419662	785697	776080	773045	773034
M349T395	349.116	394.877								614832	817557	229203	13071.1	59600.1	76691.9	32066.3	115098	20578.2	7872.7	67604.1	12607.5	68952.9	71608.2	68958.6
M394T36_2	394.35	36.2825								104604	9517.57	110497	24989.6	72647.9	127976	92370.2	187733	104786	200194	80692.2	91941.5	168822	164134	164001
M682T313_2	681.865	313.135								170330	144409	183166	177.255	105443	220711	151046	520942	306259	667933	159795	694911	535166	527806	534960
M837T135	836.61	135.037								797753	807814	777687	315161	166562	616049	217764	137002	201457	108715	198492	176188	90141.1	95680.3	96269.8
M486T348	485.989	347.766								334070	406617	399865	1528.3	321411	543057	338328	724758	541998	1.06731e+06	378624	951539	846645	846900	801823
M654T34_2	654.327	34.167								118465	72146.6	125107	27732	80792.7	165115	129270	266636	289726	222584	98343.3	63687.8	200575	196230	200644
M137T397	137.07	397.17								337508	447334	621561	80291.8	473562	328924	739815	1.29414e+06	937622	1.38793e+06	569881	1.70191e+06	837269	958453	959790
M70T317	70.0649	317.254								619047	550264	700112	1.66226e+06	1.2649e+06	785150	602474	1.00458e+06	597443	565022	645730	907075	923370	692710	924618
M791T40	790.581	40.471								241533	256267	130726	29269.3	79540.2	163553	145024	146345	103556	126547	80081.7	146689	128027	128141	131608
M110T461	110.07	460.621								1.08521e+06	2.05322e+06	1.65819e+06	697365	1.90438e+06	1.65328e+06	2.20258e+06	1.05317e+06	997198	1.53514e+06	1.27507e+06	1.68229e+06	1.50216e+06	1.62816e+06	1.62845e+06
M123T80	123.116	80.49								41225.4	84805.9	7490.22	41353.4	29034.3	56444.7	18033.5	48890.1	57213.6	30878.6	26668.8	482609	309616	289462	310122
M551T340_1	550.947	339.843								569596	876333	886075	1763	743097	1.07385e+06	792784	1.70533e+06	1.15097e+06	1.58429e+06	1.10495e+06	1.7712e+06	1.43525e+06	1.42108e+06	1.42098e+06
M510T341_1	509.946	341.129								1.06298e+06	1.49853e+06	1.58739e+06	3120.72	1.28665e+06	1.77969e+06	1.37966e+06	2.31169e+06	1.72199e+06	1.14666e+06	1.64776e+06	2.62206e+06	1.67692e+06	1.68299e+06	1.51403e+06
M674T182	673.524	181.713								425919	445584	431830	46442.6	63291.3	369986	269225	78706.1	105774	47059	115270	36043.8	46614.4	47647.1	48456.5
M305T358	305.068	357.622								76917	66869.3	89967.4	4820.86	63572.7	115727	45037	297297	88719	290183	55676.3	582915	308491	304869	304840
M523T36_1	523.244	36.107								122863	118070	94906.3	14512.2	23282.1	101887	114656	33783.2	55805.1	159084	202758	24637.5	178506	178389	177954
M148T427	148.059	427.222								530654	475407	491545	108169	458809	521545	494028	666661	572611	624577	506516	728022	679258	674484	674514
M327T349	327.05	349.32								390061	311161	423655	2997.59	295474	507262	207911	667360	377585	599523	259398	728295	657796	656784	656783
M156T483	156.076	483.124								618202	786435	966541	362746	752552	864051	740481	1.07754e+06	976076	949753	776999	735948	975413	969308	945607
M502T38	502.371	38.2545								74287.1	60346.2	33364.9	9974.7	30613.7	51697.5	91429	167822	83775.7	77530.1	37967.1	67661.1	86072.7	83640	83542.6
M343T456	343.053	455.752								171657	151069	187052	5444	150614	217312	187058	293289	245734	328692	217815	367683	268970	269004	264399
M553T389	553.166	389.111								349668	263906	260948	2262.32	259199	245634	337025	552760	377423	167758	200979	487972	426603	410147	420148
M826T342_1	825.977	342.44								135816	252698	265093	36.278	201624	384324	238632	1.30137e+06	498181	797382	444289	1.54942e+06	709667	721733	721667
M368T37_2	368.314	36.7995								208713	143871	158867	33919.6	99897.6	129629	132262	192924	161296	173170	89673.4	119701	137780	138344	137940
M138T293_2	138.054	292.63								61994.3	101665	52343.8	28455.2	77808.1	71381.4	26690.9	1.30082e+06	17445.7	50649.3	48580.4	1.43466e+06	588270	211929	588870
M173T36	173.131	36.086								114843	75551.1	189099	44605.5	39364	186054	119363	97932.5	184528	54310.3	36984.5	34942.5	102242	105043	102272
M251T346	250.948	345.982								1.71155e+06	1.9721e+06	1.98241e+06	316562	1.83839e+06	1.06574e+06	1.881e+06	1.12694e+06	1.09286e+06	1.12497e+06	1.93584e+06	1.09763e+06	1.04361e+06	1.03517e+06	1.02357e+06
M251T333	250.891	332.69								35524.6	26275.2	32101.5	32282.4	670079	29574.6	29339.9	38527	29983.8	43670.3	20757.5	37870.5	38779.9	40797.3	38748.5
M592T341_1	591.949	340.541								594975	818455	870450	5684.67	746953	1.13322e+06	789929	1.80836e+06	1.20897e+06	1.68313e+06	1.11425e+06	1.83162e+06	1.54788e+06	1.54547e+06	1.54547e+06
M161T532	161.128	531.644								1.08804e+06	1.01225e+06	1.06681e+06	323226	822620	1.13679e+06	722714	1.91589e+06	1.61425e+06	1.73147e+06	1.09362e+06	2.80574e+06	2.13949e+06	2.02683e+06	2.14322e+06
M751T135	750.539	135.341								1.08651e+06	1.09861e+06	945451	306640	189007	432023	305413	192264	207722	209952	240865	248389	118368	123955	123907
M235T356	234.917	355.507								1.02332e+06	1.13687e+06	1.08561e+06	1.13775e+06	1.13824e+06	1.01427e+06	1.16902e+06	792875	1.01642e+06	780932	1.15872e+06	640303	868240	929638	867186
M816T137	815.63	136.911								853034	848791	760144	251169	250307	343053	177344	178167	308946	181875	267195	241986	115759	116026	118690
M507T37	507.333	37.002								13815.2	27680.9	4845.52	1796.8	56144.1	20435.9	215882	22911.9	28155.7	16307.4	15564.5	10087.6	12427.7	11678.7	12437.5
M679T40	678.502	40.15								242403	253169	303049	5651.78	29254.4	352432	65450.9	186787	50696.2	157868	28846	391373	134129	134223	128760
M281T87_1	281.106	87.288								1.34007e+06	1.37055e+06	1.72556e+06	204821	1.28776e+06	1.7786e+06	400914	970210	1.03744e+06	1.64405e+06	1.05717e+06	2.69792e+06	2.21414e+06	2.20468e+06	2.20463e+06
M809T92	808.58	91.902								421142	243410	49475.9	807.303	1687.67	460881	1.5087e+06	24933.2	3.39177e+06	16905.8	1891.68	103419	33713.1	37371.6	47094
M633T341	632.95	340.575								502157	787768	796568	9930.45	685913	1.00766e+06	693757	1.10257e+06	1.12816e+06	1.63449e+06	1.03583e+06	2.03055e+06	1.31714e+06	1.24842e+06	1.3184e+06
M145T342	144.983	342.159								2.31006e+06	2.24392e+06	1.99791e+06	189682	1.91681e+06	2.0854e+06	2.46337e+06	2.45813e+06	1.8538e+06	1.80915e+06	2.03302e+06	2.02601e+06	2.05222e+06	1.77464e+06	2.05519e+06
M707T177	706.585	176.743								697646	644489	518402	78469.7	56507.3	269209	138315	33945.9	40647.5	38754.1	101357	46637.5	13018.2	13037.4	13314.5
M226T290_1	225.969	289.916								4945.4	21541.7	29752.4	4103.76	27979.3	133160	24384.9	479150	202163	580465	93854.9	669506	603715	601894	601914
M293T457	293.097	456.885								4820.87	3309.23	3747.75	2121.9	3070.87	3531.05	10524.1	7803.07	4578.88	7275.36	369338	6472.16	59881.5	60092.4	59932.5
M398T36_1	398.239	36.107								81304.3	93777.1	99375.7	26062.5	76603.2	104087	104706	119711	149388	145322	86977.8	123597	198089	198136	192581
M289T42_2	289.255	42.142								70866.7	75518.4	47908.2	28369.2	65886.3	64008.6	158074	174829	101689	103244	38447	266353	109674	109674	108743
M281T42	281.246	42.182								125037	70123.8	16847.5	33593.2	184043	67263.2	128471	146351	403145	33607.3	195718	69054	48703.4	44526.3	44801.4
M360T489	360.03	489.315								149743	114916	116005	10269.8	94454.9	124714	117473	216965	187726	254623	139122	287106	202407	198690	201594
M358T57	358.366	57.051								467775	399030	501563	215003	92929.5	393671	199350	33963.4	41649.4	39639.8	114908	28702.3	37636.8	40517.8	40358.2
M168T441	168.064	441.327								271330	222564	247814	52101.2	210922	244490	175914	304471	236710	289118	173948	337982	300578	306592	300271
M691T144	690.539	143.62								615025	636497	743324	306022	255148	655961	450849	194094	328871	177454	353064	243365	104822	122842	122829
M518T36_3	518.491	36.002								164618	167303	169989	15216.9	15845.6	78159.6	26073.6	9989.8	22394.4	11512	20907.8	33320.3	5599.64	5524.3	6161.57
M172T37_2	172.168	36.822								3949.45	36933.6	10982.4	2119.54	8519.86	4306.8	8681	15603.6	9552.51	8949.23	4537.76	19622.4	32122.5	35584.6	41015.2
M449T36_1	449.347	36.073								102891	115724	135467	25494.2	125577	119348	76991.7	164399	199554	194568	160798	200058	201033	217405	201060
M735T61	734.565	61.34								1.43394e+06	1.38935e+06	1.43156e+06	2450.3	3502.04	858428	7008.27	114136	6574.74	237332	2587.03	1.12112e+06	110759	149639	159105
M330T87	330.245	86.84								1.26677e+06	1.32455e+06	1.10889e+06	231226	119558	777844	569760	541273	241181	571543	177807	117418	699474	711555	711833
M524T443	524.055	443.095								330251	317592	341782	108292	334771	316481	277210	417814	347614	436726	311059	495262	437158	431464	431465
M308T446	308.09	446.272								572387	801173	271468	80526.9	282889	195913	90078.9	106287	261140	22726.4	140994	48879.5	75249	64040.6	65822.4
M124T227_1	124.038	226.784								237447	211726	316889	25146.6	217820	303028	44432.4	51774.9	27044.3	88019.5	50748.3	30099.5	121787	111550	111474
M674T341	673.952	341.449								495572	750806	725633	777.67	608924	1.01697e+06	621317	1.8933e+06	1.08006e+06	1.59329e+06	980062	1.28874e+06	1.42286e+06	1.42348e+06	1.30095e+06
M891T340	890.939	340.098								456269	627389	638763	457.823	535757	829744	558771	1.60012e+06	949200	794271	822182	1.79874e+06	1.29678e+06	1.28178e+06	1.29675e+06
M211T37_2	211.168	36.781								133880	80762.3	179884	66209.1	104775	207809	157944	149536	124748	64113.6	99457.2	57155.8	122863	124348	122873
M251T8	250.988	8.1865								1.11085e+06	1.55196e+06	1.26538e+06	1.24437e+06	2.07453e+06	1.74454e+06	1.33821e+06	520143	1.43164e+06	1.84695e+06	339122	1.89112e+06	697329	884349	703111
M769T98	768.585	98.142								169598	182270	179318	1859.67	2186.91	144641	1.35102e+06	20978.1	2.02698e+06	21365.3	3664.47	45065.1	18495.5	18513.5	20126.3
M257T227	256.964	227.264								1.2404e+06	1.46845e+06	1.50506e+06	5.94888e+06	1.20197e+06	1.15126e+06	1.76215e+06	837752	1.60766e+06	955015	1.29548e+06	901225	1.47949e+06	984496	1.49504e+06
M404T349	403.987	349.283								286185	293862	337338	2739.27	270521	412883	237391	539914	379142	521490	286369	627328	553270	551537	553283
M158T36	158.153	36.245								61563.4	43390	44923.2	18471.9	95973.1	50065.3	85674.6	150652	93073.1	111226	84845.4	147065	112095	114900	111894
M408T37	408.365	36.963								155345	133036	116735	66209.1	106753	256250	281579	324143	145701	261579	182297	121458	277101	272031	271970
M814T345	813.998	344.549								121716	181390	223694	29.9196	155474	339139	147571	880791	415170	798827	272399	1.06876e+06	705164	708280	705177
M253T49	253.215	49.1225								166363	240280	87481.3	37768.1	279890	198096	178667	246139	566985	107720	260224	93589	57602.6	58719.9	57629
M449T35_2	449.432	35.093								115635	118107	20873.1	515.767	9041.67	78897.6	41958.7	28005.8	43695.8	10023.2	25702	23565.3	41989.9	49652.5	16700.7
M136T215	136.061	214.545								745854	725000	1.03975e+06	338908	1.00486e+06	940283	560739	87554.4	439135	185933	448663	195698	137593	133274	137584
M290T452	290.019	452.36								348010	205231	132645	8351.36	136790	122832	157678	349632	323721	188921	181365	213286	315913	311214	315939
M355T38_4	355.283	37.77								126894	159237	87659.3	29782.6	115458	140284	177222	181598	244815	141200	112982	56559.9	127213	118656	118804
M531T339	530.978	339.253								195279	248878	246781	166.013	201972	333820	210013	918446	368367	378400	305876	491118	234868	234042	225227
M757T58	756.55	57.998								67696.1	694720	356771	625.475	2240.58	342470	197165	51836.6	8644.33	85609.9	1940.49	798377	62145.1	61388.3	62143.7
M268T251	268.103	250.662								85905.4	185320	260660	159541	164631	508489	155459	463478	208147	825048	218065	798275	523089	523096	517289
M405T455	405.007	455.094								175482	149792	162350	29649.2	139737	196943	145211	309788	208156	343009	159299	404207	312920	308490	307776
M147T378_2	147.075	378.298								960073	936047	868800	193700	788297	768464	313283	476794	282174	268136	297490	805791	725107	733648	733619
M747T91	746.601	91.084								401052	405835	405101	1033.17	1102.45	137410	609081	199257	191149	83706.4	1011.39	102368	112063	87815.8	86118.6
M295T38_1	295.117	37.612								75730.2	67297.7	107624	32291.6	121110	117883	106700	113054	100999	111956	90951.4	163252	146447	146620	146552
M296T36	296.293	36.179								27732.9	22511.1	29659.4	5421.33	173690	29865	25006.6	25305	6619.8	13526.8	4281.42	2785.34	13426.9	14859.1	14878.8
M773T343_1	772.994	342.959								85857	177470	197884	321508	124868	306952	161433	947797	382349	728368	283758	937798	725907	747629	746884
M601T39	601.469	39.395								14383.8	28123	17151.6	18819.3	77682.2	40480.4	83857.5	102506	121901	65375.6	88785.8	87080.6	91077.7	91572	77883.3
M286T489	286.055	489.315								109556	73358.9	76528.1	12588.3	58099.2	77309.9	70132.8	165548	105017	167173	71449.6	232408	167885	166645	166673
M321T36_2	321.314	36.073								171866	141820	206498	52879.7	41825.9	148850	91595.7	49320.1	54921	60020.3	64641.7	61000.5	46780.1	49222.2	49027.5
M402T310	401.914	310.092								74584.9	80412.4	85735.6	1202.93	79558	126452	91144.8	348132	174116	297845	109887	433481	257275	254002	254030
M794T33	793.626	33.4485								11046.2	18252	186637	3584.01	5855.79	35664.8	10337.1	74455.7	13876.4	3996.81	7562.37	10027	62369.1	51159.4	62744.4
M468T478	468.118	478.187								38642	40485.5	90571.4	12662.9	74705.2	93166.7	75407.2	193674	111045	287598	50603.3	575664	208321	206208	206199
M781T92	780.549	92.295								80151.2	75723.5	95850.6	839.386	2509.7	119123	821979	25093.4	245295	26981.4	11472.3	32919.3	61504.5	54123.7	48262.5
M317T346	316.919	346.301								831903	631012	565454	216001	848864	552829	512681	632938	564541	760454	891891	715866	688052	688560	746181
M340T40	340.291	40.169								240934	105812	99502.3	42615.5	137398	38588	103248	20142	145291	24367	169207	50999.4	31689.5	31186.2	34110.5
M355T36	355.337	36.311								114877	126244	142160	16770.2	37954.9	73181.8	87370.2	91057.5	174298	90547.9	43931.7	36254.4	106218	106722	127094
M333T340	332.951	340.173								936121	586336	1.09107e+06	113796	1.0516e+06	568676	968105	1.36837e+06	524288	1.33638e+06	1.22236e+06	1.45834e+06	967862	882528	917139
M539T36_1	538.519	36.002								186625	166265	127985	24876.5	13171.1	66391.3	26951.6	32341.7	25358.1	25302	31247.7	47415.1	14075.9	14597.3	14080.4
M769T62	768.582	61.82								185244	134688	168226	463.15	3039.03	143525	2.69453e+06	31472.5	655407	33834.2	3954	145876	28312.5	27639.8	28295.6
M801T138	800.613	137.59								514582	543518	486816	168324	150694	293433	140694	114961	190164	127962	187839	126434	64662.5	67148.2	64922.4
M203T338	202.968	337.969								302739	296461	261460	8798.36	252328	275080	293171	308696	303972	753245	222894	510124	754998	736284	736723
M771T95	770.599	94.573								135092	117701	135392	2592.15	1325.48	99587	657419	20693.4	900509	94018.3	1999.31	29929.7	19353.1	19110.5	19526.7
M124T453	124.038	453.445								138835	106989	124002	37876.4	117743	148768	116417	197796	183036	278997	119880	212608	194114	189045	194118
M258T114	258.242	114.249								669419	561782	479880	166574	561466	510190	507084	730432	642930	538738	200352	104396	573270	547725	547418
M534T257	534.189	257.163								151088	121391	157057	89.6592	106254	208715	68803.7	371660	158964	323342	87283.5	513925	358740	357416	357407
M380T36	380.335	35.506								146463	109626	93417.6	24339.7	102695	128626	126524	224817	90009.6	213630	119596	161884	202598	200786	201117
M110T513	110.07	513.304								2.34964e+06	2.48595e+06	817658	301367	2.54478e+06	2.54305e+06	2.15414e+06	1.58868e+06	1.0424e+06	1.92988e+06	1.84195e+06	1.51671e+06	2.08492e+06	1.83879e+06	2.10133e+06
M210T291	210.011	290.967								25745.1	2479.89	4028.3	16890.3	5728.89	20330.9	4365.37	460079	41653.5	262928	19990.1	1.04427e+06	170060	163821	170051
M204T257	204.032	257.156								375087	414902	471633	30515.6	458706	443896	400739	465684	464418	463605	457507	497609	453227	445339	445830
M497T340	496.956	339.553								985110	1.2591e+06	978202	33665.9	1.02387e+06	713514	1.0223e+06	1.22876e+06	743938	822260	868654	1.46366e+06	958513	848263	971553
M137T277	137.07	276.538								50346.4	91728.5	1229.21	723.091	124176	384764	234789	203758	444607	265724	566217	500880	296337	295208	295217
M715T341	714.952	340.507								304357	515744	526115	1903.94	398292	690693	437722	807657	764004	1.22137e+06	705425	1.63711e+06	1.13941e+06	1.12423e+06	1.13938e+06
M786T175	785.648	175.252								324940	302970	180468	22101.3	21327.3	32147.7	31781.7	14736.6	18241	10253.2	34214.3	22357.5	3630.45	3910.34	4166.16
M256T350	256.013	349.523								389762	364775	449654	11806.6	347373	505363	296510	552094	448570	592560	329145	612808	587550	587586	583462
M469T340	468.945	340.07								1.04256e+06	1.29182e+06	1.42262e+06	1038.33	1.30226e+06	1.31497e+06	1.21238e+06	1.17646e+06	1.1694e+06	1.27429e+06	1.30247e+06	1.43066e+06	1.14445e+06	1.14403e+06	1.03875e+06
M130T150	130.158	150.296								244458	105206	69095.7	30984.5	156408	125253	297055	453824	123905	165627	114842	188418	259006	260064	262519
M107T37	107.085	37.365								21222.1	18532.4	30838.7	4233.82	18863.1	31729.5	41634.9	37674.6	46668.5	62149.6	15306.8	20678.8	35218.3	30888.1	30518.6
M229T36_1	229.197	36.125								125435	79905.6	174536	64209.1	100660	201632	120913	137018	108052	75103.5	79588.9	60750.1	138639	138590	135921
M144T442	144.064	442.077								270467	245314	266650	58887.2	258224	293390	193617	338247	254574	325476	193746	359847	336652	365184	336414
M390T34	390.054	34.1745								188400	158033	198309	56295.6	78163.3	203873	140562	161729	91820.9	147714	72271.4	97673.9	175384	176244	176246
M756T342_1	755.955	342.125								358780	505085	541772	1236.9	419757	722863	449952	1.52918e+06	793547	961213	670113	785244	1.14217e+06	1.08559e+06	1.14204e+06
M299T50_2	299.256	49.5985								100634	109958	55344.9	23346.1	133717	105430	82490.1	123692	254386	78842.5	138585	47401.6	38602.9	44283.1	38464.3
M575T34	575.5	34.348								222790	205797	264361	35091.1	77369.5	76351.6	39007.1	26720.3	64831.7	30855.5	91348.4	96015.4	16274.4	18658.5	15573.1
M694T28	694.134	27.814								270270	16827.6	11261.4	2712.3	16673.8	16059.2	12058	62389	25236.8	22760.9	47844.7	14030.7	47831.5	47645.1	47344.3
M263T178	263.085	177.644								39621	100180	101995	30224.3	611094	108931	85806.3	187657	81313.4	86970.1	51405.1	135760	157442	157452	154474
M370T177	370.294	177.263								213110	129983	154445	23753.9	116551	176513	251441	283988	282909	292639	307344	79951	238719	227560	238784
M581T487	581.039	487.36								140855	108764	113518	22001.8	99138.2	122593	82669.7	177102	114284	176030	84504.9	206102	189646	190742	189646
M725T136	724.524	136.087								818421	818422	704780	200361	147760	345950	190060	156280	246131	174821	224129	197023	98778.4	98907.5	101328
M488T37	488.298	37.365								113475	65472	97985.7	87662.6	148145	96397	195461	105826	90996	315211	200457	113932	226212	225947	212353
M838T342_1	837.958	341.603								184003	298482	332113	408596	257627	459440	264693	727489	481175	904514	457050	1.19252e+06	728975	675772	675604
M1031T342_1	1030.98	342.423								167897	271352	276686	56.8122	215657	416525	229356	858896	497183	835766	408958	983568	852813	787544	852034
M315T35	315.173	34.815								79182.9	37627.7	63525.8	28903.2	122472	66183.4	89141.2	110237	118829	155220	61309.7	68455	131876	126106	130780
M386T174	386.324	174.316								260772	207403	218504	41333.6	116558	296371	291419	375526	385322	329831	281598	50118.6	306208	312423	306334
M718T178	717.586	178.399								443998	410797	349196	49782.1	47726.2	179802	68967	16823.4	39769.7	19711.2	68189	34289.1	10064.8	10478.1	10479.7
M183T309	183.004	308.648								420537	396989	383149	33062.6	382070	389066	323119	310915	300216	327656	285567	347380	346744	341366	341373
M229T37	229.142	37.3665								39130.6	99976.6	13899.7	46392.9	138111	60743.6	108255	223681	164989	53719.1	88908.2	49162.3	55478.3	58438	60426.7
M769T82	768.58	81.9405								299259	775859	272537	20683.5	9620.05	187812	1.42966e+06	38491.8	1.27767e+06	44048	13971.2	64828.3	32380.2	32382.9	31589
M791T136	790.568	136.368								388921	480366	456654	217525	155835	470015	242526	114118	219950	80271.2	157389	136139	82575.9	88108.9	83001.4
M741T145_1	740.519	144.745								445901	468234	435750	161683	104585	340985	98854.6	107747	168279	131071	145108	197235	56325.8	77168.4	77318.2
M833T40_1	832.581	39.974								130964	142321	141528	3316.82	8465.95	191974	159444	65614.2	23482.7	69457.3	13023.3	190921	76367	60160.6	54997.8
M537T36_1	536.501	36.002								154405	137629	168580	22627.7	14777.5	69722	23199.7	15298.5	22158.3	11365.8	23871.9	32827.4	8370.54	8360.11	8749.72
M244T125	244.262	124.904								490241	525870	517432	63818.9	166659	597460	1.227e+06	433558	507383	410988	151731	97628	388274	387545	398124
M711T209_2	711.068	208.863								317349	400509	463379	15.3402	502907	512849	662195	823430	545514	302916	697448	1.05633e+06	520723	526566	593270
M386T162	386.04	161.701								314562	495196	425637	646768	562205	503077	344495	492026	380019	482215	274659	474478	534033	531343	548276
M309T184	309.126	183.661								207154	205362	193595	40014.8	165513	181711	165715	254256	195751	205194	177149	276033	258304	248839	258252
M179T37_1	179.064	37.365								77426.9	74636.2	50814.1	10938.4	74900.7	51727.1	142550	163478	115442	149848	67647.5	167309	109058	113840	99315
M369T40_2	369.26	39.961								53009.4	41550.1	8875.38	3924.03	66642.6	19454.5	26762.1	75293	88997.5	19914.8	41337.6	137309	11852.1	11895.8	10875.5
M527T263	527.168	263.344								34138.1	47793.3	80974.4	44.0928	29635.7	122577	16869.3	179514	49471.2	361358	27460.6	155574	220925	221521	220925
M259T34_2	259.168	33.903								60779.2	45882.6	26917.4	3850.68	28719.3	52751.1	43537.8	30184.5	130041	39418.6	14584.7	56356.5	17769.7	17735.4	21011.2
M315T47	315.107	47.412								116155	103196	124335	47923.3	237054	161985	106390	122184	176895	145382	164537	129085	132214	139971	132468
M179T38	179.106	37.9605								14562.4	12308.3	3028.45	2239.43	15804.2	11914.8	21013.7	18664.9	42546.5	11774.2	12025.6	19165.4	17903.5	28189.7	21132.8
M630T442	630.068	441.965								451963	437566	472980	238536	436877	488155	411937	543323	477320	550322	431331	583279	526942	531188	531186
M340T350	340.045	350.23								63359.7	89254	105272	1363.22	98470.7	146816	94039.7	285556	142824	347222	132815	418519	259541	257181	259592
M105T38	105.069	38.262								41090.7	17722.9	48724.5	25236.4	114577	43550.4	101422	71939	103681	69490.8	94917.7	103080	53957.1	50343.2	50286.3
M130T428_2	130.049	427.549								685034	650077	631735	117185	597327	610390	508285	598205	472553	594539	438188	747690	705857	686121	705889
M332T78	332.314	77.605								902184	575493	799940	172228	317703	540768	354784	434480	385304	441809	295802	96136.8	351956	363316	363206
M488T38	488.355	38.105								75444.6	75447.4	54003.8	11256	74282.5	13788.8	87686.7	110193	121093	108117	66976.1	100242	93445.3	93851	93851.2
M282T91	282.278	90.884								1.82671e+06	1.90818e+06	1.89611e+06	264617	110585	957912	1.09975e+06	907766	201709	560548	269334	35813.6	593483	593596	420871
M326T497	326.056	497.161								105003	91354.2	115211	42962	106376	131173	130579	176967	162435	188449	136720	244490	156257	152380	152429
M691T150	690.503	149.573								155331	158614	126608	46880.5	13097.1	40823.8	23102	26857.5	138236	17957.4	49125.5	43166.4	14519.1	14565.8	16659.5
M607T209	607.059	208.999								307595	373786	466072	471065	406694	421575	611478	1.02706e+06	524941	889186	699304	2.01409e+06	450070	443613	455591
M140T292	140.001	291.824								1.67337e+06	1.80487e+06	1.28974e+06	1.52821e+06	1.03085e+06	894163	1.93752e+06	1.01007e+06	786695	1.00769e+06	699104	978288	952807	1.09636e+06	1.09516e+06
M140T297	140.052	297.159								5744.22	6418.52	7758.53	971206	7917.9	12710.4	1705.64	693.869	2177.81	642197	3635.2	4606.66	8657.97	10182.8	10129
M797T342_1	796.956	341.993								219850	337275	354756	2879.08	312266	528515	333206	872971	611807	1.09247e+06	517918	1.36558e+06	821251	875677	875206
M629T39	629.499	39.463								43691.8	20528.2	24707.1	13599	56445.6	30098.8	69652	88381.6	104869	70200.1	54086.9	44633.9	71915.3	71903.4	71322.4
M431T312	430.87	312.31								177885	167510	194253	1109.24	139825	261086	186968	650590	348329	637189	198293	747193	520100	510851	520116
M114T170	114.065	170.133								160646	157936	152151	26435.7	137911	219339	169225	400772	296044	418236	178961	510266	383665	377259	379516
M351T36	351.179	36.125								33709	49389.2	31032.8	7366.45	20030.6	38436.6	42814.3	44907	41250.9	132430	108908	14778.3	79903.2	77917.6	77916.6
M188T48_2	188.092	48.3335								350156	271396	306771	103471	509092	434103	441066	430024	527736	333892	502330	253508	460369	431147	461102
M397T38_1	397.198	37.598								75730.3	69592	109859	26752	96628.6	101324	92612.4	102725	108198	123307	72869.8	156557	133632	122233	133671
M110T483	110.07	483.08								582770	683707	704776	437302	571754	688921	567351	728924	750007	790318	703968	522444	641643	639505	610424
M380T349	380.025	348.653								123362	126470	157629	524.226	111817	196859	106572	310436	163719	327575	128299	409530	312567	308871	308868
M251T431	250.987	430.826								1.43992e+06	1.67386e+06	558894	2.532e+06	1.70795e+06	1.58982e+06	1.05751e+06	1.19747e+06	1.51773e+06	1.2804e+06	990508	1.01749e+06	1.21963e+06	983212	1.2183e+06
M191T36_2	191.141	35.957								89048.1	62782.1	140674	44634.6	44136.5	167497	110422	94524.3	86475.8	41010	27066	24812.1	83290.7	84170.2	84178.6
M492T36_3	492.475	36.0635								126980	121979	147488	16170	11486	77569	27398.4	11706	22355.2	11580.1	17777.3	27276.7	7146.14	5025.39	7124.58
M170T237	170.011	237.424								228838	182173	194238	6457.68	176825	214847	221708	285006	247870	323923	223582	416756	310340	303507	303799
M719T59	718.569	58.841								957367	975277	1.11743e+06	625.612	741.821	313292	40767.8	86441.6	3739.54	88132.2	757.294	809321	53543.1	48460.7	53505.7
M795T80	794.597	80.002								260185	365517	352854	28990.6	16119.8	87801.9	691355	20665.8	1.0282e+06	23993.1	24160.4	21300.6	16266.1	16266.4	19150.7
M686T339	685.932	339.39								353993	486831	492062	641.039	429958	613658	449261	846677	665295	798230	628867	386812	763946	763935	762161
M147T439	147.075	438.818								153161	124971	156417	50279.7	146241	130623	70159.4	93618.6	60638.2	72879.8	74986.6	217743	133663	133659	135035
M366T35	366.371	35.465								100405	96917.1	130736	36453.8	25763.4	45872.7	24631.3	6331.81	20906.5	17081.9	37433.1	33450	9710.29	8580.93	9589.65
M164T299_1	163.968	299.128								175602	176773	187205	88496	250953	250906	254463	271680	283456	323846	275783	302648	294508	289781	289907
M302T41_1	302.267	40.8115								49272.6	56794	35438.1	52808	122592	54442.9	132310	275141	242956	213919	76325.1	41426.2	171070	171833	147312
M335T260	335.091	259.565								10295.2	10173.8	10412.8	574.063	86751.8	12079.1	10570.1	35260.5	17482.5	34249.3	9389.86	27165	31380.6	30460.2	31408
M156T554	156.077	553.615								251884	468639	882973	271356	739374	437718	498659	433854	406295	349757	216238	1.29906e+06	893970	1.07237e+06	885517
M274T37_2	274.163	37.426								65343.4	67784.4	25225.1	2185.71	67519.5	69752.3	64565.9	101619	139122	47733.3	52288.4	25346.5	23525.3	25780	23127.5
M608T477	608.086	477.405								746515	609419	707293	275423	190281	810820	608162	786202	762486	210576	582265	796378	500491	401167	502089
M908T342	907.979	341.997								86196.4	160686	164129	73.3493	122251	265358	137590	659284	356473	549750	260187	687190	567876	567808	559722
M247T35	247.205	35.4145								32320.6	47935.7	59787.1	10869.3	66971	72162.7	75034.1	119609	115212	111189	73243.3	154253	100243	100247	98350.4
M668T26	668.069	25.905								229823	18773.7	7954.66	5277.45	4400.49	17249.6	10241.3	18919.7	5863.62	7052.29	12927.5	3617.15	16785.1	17156	16789
M234T122	234.205	121.974								475557	573126	256012	55269.2	537083	479624	357662	502873	258231	353198	349902	287533	295453	317765	295520
M484T497	484.113	497.161								100164	70727.4	100853	27778.2	77074	128875	125497	218195	176090	216989	114190	244888	193959	190906	194057
M747T73	746.6	73.279								1.41004e+06	798713	608992	793.108	1023.34	281300	281966	70062.7	14438.4	88359.2	1221.27	342825	62596.8	61283.5	62608.6
M194T314_2	193.98	314.244								213186	177361	219989	7626.59	180626	257139	214370	452731	324117	449622	172495	531332	389708	389705	396512
M176T316	176.007	316.3								20334.4	18754.8	18347.1	2716.32	18530	22874.5	19384.1	29741.4	25082.8	20892.5	19229.2	216338	39296.8	35316.1	39304.6
M879T342_1	878.959	341.882								143396	251451	236244	2586.31	195005	343495	225428	962524	452307	561908	395139	694822	651027	651119	609596
M129T237_2	128.985	237.424								233316	168246	182563	7034.95	173116	342097	207357	276356	225101	308148	210640	370880	290726	282945	283145
M481T359	480.85	359.378								12957.5	11587.4	8074.57	15227.5	13827.8	8758.17	16383.6	5537.02	12462.2	6109.91	11363.1	363600	5331.57	5329.03	5458.38
M1054T517	1054.34	517.116								80459	105271	106114	29836.8	116258	95464.4	142796	138267	137159	122059	135528	150020	93858.3	91565.6	91552
M903T199	902.57	198.958								155949	128114	91039.8	10078.8	9295.53	24716	9936.38	9224.24	12295.5	9433.88	14516.1	12687.6	5860.31	5746.85	5984.01
M294T38	294.241	38.1745								83118.9	74984.1	63175.8	38994.8	110244	61959.9	97486.8	128133	101406	143061	100626	140382	136921	133020	133022
M446T359	446.108	358.912								13214.4	6942.26	11393.9	1443.95	5955.32	10830.8	5910.26	111467	15226.2	97702.9	7410.03	255754	105212	103238	105217
M187T306	187.036	306.479								214213	193365	201195	58474.7	132677	197212	161836	92245.6	129841	150788	117832	109714	159842	156264	159810
M251T41	251.183	40.697								78560.4	35874.1	15801.7	28631.5	76193.3	36286.3	64327	10567.5	93169.3	69079.3	69547.8	103643	73685.7	65844.1	73603.2
M598T310	597.866	310.015								31740.7	38189.8	38948.3	232.652	34494.6	68255.5	43123.1	256101	104989	219396	54608.8	346316	173165	173216	170259
M607T34_3	607.389	33.55								156286	132146	109272	33674.4	32827.4	154532	93344	29947.5	51881.7	30319.8	36264.9	40320	20628.2	24049.5	20492.1
M300T90	300.288	90.286								1.3904e+06	975594	1.46849e+06	263905	208249	1.40838e+06	934135	197697	332901	157447	262449	68765.4	463346	460091	332101
M170T227	170.116	227.321								136927	134189	73796.8	11784.6	81164.4	66232	72457.7	223977	87477	79458.2	53550.8	176830	57686.9	54479.7	54492.6
M578T39_1	577.516	39.395								313634	301845	284020	41040.8	200143	66215.5	108461	14097.2	140930	28417.5	47577.5	99970.5	35323	35310.6	36545.7
M136T234	136.061	234.292								232685	203779	258201	121626	329891	55325.1	186696	233205	84191.6	1.33809e+06	179637	579721	345730	345720	384522
M573T349_3	573.057	348.538								91041.8	83086.5	106163	124961	78598.1	134031	59406.6	226326	123575	238532	91034.9	363961	242172	240049	242629
M344T182	344.278	182.343								172211	141065	171906	19422.8	130483	169159	189697	279142	237263	271328	234360	120147	242924	248286	242901
M288T127	288.252	127.189								483585	415658	284441	107000	321396	292903	481044	747170	541211	468166	115043	102331	444034	467568	467721
M620T36_2	619.609	35.9215								82729.7	35890.9	46595.6	17475	10499.7	39800.5	38379.3	22581.8	9851.39	53458.3	12275.9	16440.8	24783.4	24805.2	26998.9
M583T347_1	582.501	347.248								24938.5	27449.3	33546.5	69030.6	28219.8	60100.9	22264.5	231579	63037.8	216362	38555.7	356246	195529	196097	196096
M274T240_2	274.181	239.767								132121	26380.6	4922.66	8313.04	44505.5	16856.8	52825.6	314171	72507	136455	1706.68	167408	72186.5	72265.2	72615
M314T37_3	314.304	36.772								156384	147552	172642	26964.8	51241.9	188890	148270	168153	78160.2	104800	46007.2	48391.2	130370	133535	133557
M173T427	172.966	427.257								175972	175279	127262	16215.8	90927	200865	186747	370288	206254	312131	113857	412160	327884	324796	326982
M810T173	809.648	173.364								243106	218783	163730	15927.5	17050.7	49878.3	19752.7	8516.91	19335.6	5603.99	30237.9	8643.35	3367.52	5162.14	3720.42
M473T34	473.315	34.177								73273.5	53840.7	72201.6	11707.1	24320.7	67110.4	58503.8	135401	65019.8	84133.1	18273	53056	70168.1	67409.5	67443.5
M335T293_2	334.919	292.951								947.393	3293.52	3323.68	893.739	4540.36	6581.33	3118.6	2799.62	3319.45	1529.67	3637.24	731.295	6835.54	7105.55	11136.6
M765T134	764.553	134.392								286916	335076	313030	144548	113584	317804	144459	86419.1	135684	72375.8	143667	89356.7	60606.5	67604.6	60870.3
M896T345	896	344.758								66974.5	102525	113963	75.4749	81553.3	189085	81114.7	552713	238750	486966	149498	675071	437527	434781	434732
M309T41	309.241	41.303								29895.6	8665.54	6603.96	2369.45	29953.5	16462.7	46457.5	35694	89508	9937.34	28409.7	8112.21	12133.1	16637.7	9713.95
M741T138	740.552	137.876								267588	310853	290755	168113	118466	290512	214116	89892.2	125992	75712.2	114394	89387.6	79813	86562.2	80547.6
M295T36_1	295.152	36.0795								17339	23451.5	116371	44649.8	19049.9	23690.8	28722	44395.8	44748.2	17239.8	17295.8	16772.5	21191.1	21193.3	20058.6
M267T172	267.265	172.081								139394	161675	261598	60112.1	257006	313849	141668	367193	194062	586139	151836	758880	435615	419729	420080
M208T36	208.168	36.2985								20796.9	35227.5	132297	39313.7	20260.2	125721	73152.1	78524.2	24179.7	16925.5	29217.2	32002.5	64961.6	64971.9	67399.2
M568T342	568.489	342.211								123074	235213	223565	336370	166156	335298	180721	899801	404280	542006	332412	702523	674152	673904	689072
M227T116	227.182	115.986								753292	489109	491083	35753.4	360133	457792	240611	781889	273170	646582	249801	563212	567369	567385	574593
M202T306	201.933	305.527								94149.5	127955	121087	3704.9	109720	160454	118749	322854	167296	281975	132250	395956	234709	234771	230315
M291T356	291.02	355.89								98133.8	92994.7	91311.7	12287	77564.5	100422	108869	212636	152847	174576	105078	226620	173884	173901	172330
M579T340	578.958	340.193								491386	640803	660502	10964.6	582078	750744	591869	996711	428746	973729	325433	1.04624e+06	928865	914307	914322
M292T308	291.974	308.335								99950.7	105059	106448	734.032	102847	145396	91327.9	267014	160652	254709	115565	344407	206464	202459	206576
M458T37	458.345	37.157								74307.5	67263.6	40222.1	9821.25	59416	55680	73423.4	110329	90807.5	78816.9	40824.9	60915.1	83314.2	83258.4	79046.4
M184T356_2	184.093	355.913								51538.1	60473.2	78997.6	2205.91	50262.2	96723	49922.5	240163	110124	235275	57682.4	422795	212972	203249	212992
M270T37	270.242	36.943								57082.5	86235.7	41659.8	11644.5	64419	65299.6	78648	131116	69748.8	75053.6	11131.1	48350.8	72236.7	71751.2	70677.3
M156T581	156.076	581.426								1.07278e+06	759664	206824	90399.2	204507	2.14948e+06	1.07385e+06	436392	421847	614584	708242	312382	701150	520497	696483
M372T504_2	372.106	504.092								28745	27486.4	47351.6	9049.15	29977	40006.3	53263.6	129629	73211.9	131349	50130.5	164146	101049	101068	102726
M768T340	767.935	339.734								257478	406347	400948	310.854	325395	508806	349428	819919	517042	741072	495312	888245	692823	687634	690933
M257T389	257.303	389.111								281799	257735	235866	37949.4	251634	229386	290406	410684	290925	141548	181397	299250	337183	331266	330978
M522T339	521.926	339.469								457130	652357	625107	3760.15	542881	686186	558809	484797	670263	788743	662442	772593	774716	774694	763470
M553T348	553.48	347.893								47778	54697.3	71598.2	1211.96	46090	107827	38797.7	240067	100308	218740	63052.4	309891	223412	221839	221841
M484T472	484.115	471.577								32423.6	23545.5	29875.7	12216.6	26139.5	48110.7	43592.1	128141	70857.4	125609	51957.7	259165	97544.7	98870.1	98880
M333T479	332.561	478.807								714860	470892	527214	74419.7	661579	92282.6	560917	225279	585376	629399	369740	557173	147710	170594	170839
M170T217	170.08	216.962								151572	26510	67812.1	9741.64	43825.6	14478.8	28497.4	58853.2	18941.5	22852.1	14715.7	3481.38	33885.4	33960.6	35498.3
M258T351	258.042	350.65								79274.5	106751	135158	922.316	107628	179616	112082	243946	152917	308596	142471	363512	241078	241067	237500
M604T340_1	603.93	340.07								414506	599260	556582	1495.57	509687	669202	498408	459617	670178	791394	642323	799218	770410	779437	770419
M486T313	485.912	313.485								122769	106098	128427	259.244	86217.1	156323	108794	324812	188650	353194	110883	404301	307708	303479	307709
M291T315	290.883	314.571								459307	414065	463833	4918.52	381543	492253	460108	653299	573830	684901	451020	634461	640030	637788	643648
M973T340	972.941	339.806								192239	280169	271857	198.889	236841	358208	220783	769749	418809	428387	367301	914158	499290	499264	540622
M445T35_2	445.365	35.342								181493	211771	198782	60258.4	79392.4	202844	146314	103122	157685	62381.4	82436.1	77647	62199.5	65263.9	62226.3
M624T347_1	623.502	347.248								12023.8	18431.2	22182.6	48625.5	13715.2	44235.9	12540.6	167515	43285.9	158361	21311.1	261443	148233	148231	150298
M529T157	529.354	157.429								155875	187509	165613	14791.8	29477.6	165421	110197	96591.7	51101.4	49016.4	35425.8	4467.54	86726.5	86814.9	93397.1
M761T227	760.582	226.748								28731.6	17830.7	25564.8	12040.8	888734	23138.8	18701.3	28848.9	279221	23256.4	122910	18553.7	10216.7	18766.2	22835.2
M393T501_1	392.618	501.122								26040.2	22057.4	44017.4	4271.93	16231.5	26472.1	55369.9	121875	58501.8	130011	51110.5	156400	107256	107281	105109
M255T89	255.158	88.902								266714	546457	121799	12612.5	167571	524736	313132	366112	754157	210814	254945	92712.8	81176.1	74950.7	75268.5
M167T112	167.08	112.159								407852	293864	411219	90265.6	332554	508833	156459	920259	266025	1.23095e+06	143582	1.45111e+06	944735	933364	933345
M405T442	405.007	441.875								202434	181919	210284	51725.6	185658	217882	132686	245708	194573	255917	138110	277875	247295	248412	245829
M502T196	502.29	196.386								256517	144142	120534	27331.7	48529.5	101013	120945	121976	87854.8	118782	42668.2	31378.8	151470	151826	160642
M393T310	392.905	309.553								441255	460735	481616	27025.6	446848	516060	485596	670493	583805	688880	524879	685716	575266	563658	569432
M920T343	919.96	342.85								136415	219800	224879	186.488	178084	331572	201170	600697	391428	670799	319757	1.06471e+06	587658	592281	618169
M463T35_1	463.375	35.447								200175	219079	237440	52064.9	56090	198038	210060	180822	141066	103338	69819.8	67895.6	108272	109828	109831
M119T302_2	119.048	301.815								131255	134043	161984	31228.8	131260	195941	125495	219225	164005	226100	115966	282441	250358	248909	248907
M415T341	414.952	341.021								629562	787543	773984	41523.2	715185	463709	721977	984992	391137	971887	804602	522727	670096	766759	672054
M546T39_2	546.397	38.716								44815.6	36254.2	20994.7	11460.1	57470.3	28966.5	106541	113437	87467.7	57962.1	48357.8	14950.8	61129.6	60231.9	61987.5
M425T36_3	425.37	36.327								67094.5	137438	108025	28232	118715	134035	58812.7	130661	98919.4	172265	94413.4	134082	173152	170276	173201
M781T58	780.549	57.9								366223	352741	380477	5346.74	5148.19	363380	1.3576e+06	50457.1	51174	119377	5367.55	793725	79018.5	60406.6	78860.8
M301T34	301.14	34.261								78452.7	65619	63178.1	79473.4	146374	73478.3	86856.8	138449	121188	117888	116966	154944	128473	125974	125990
M1113T342_1	1112.99	341.882								67112.9	131530	133842	79.7454	97413.3	194473	101638	443810	268675	397092	204656	975450	467929	446174	445722
M350T38	350.304	37.519								109339	90470.2	92143.7	34967	91938.2	83111.5	85421.9	102292	121784	119309	65923.7	84697.6	105543	108449	105611
M243T497	242.562	497.159								8242.31	4761.32	4133.8	1564.36	6108.05	54125.2	3942.03	111980	8860.91	13798.9	8263.62	13689.7	14310.6	14303.5	15084.9
M542T347	541.5	347.248								23502.7	23932.5	35745.3	62954.6	19584.8	52246	17071.4	207954	59419.4	194674	31842.1	274271	183594	183101	183101
M140T225	140.001	225.266								1.26392e+06	2.24394e+06	2.35432e+06	3.48978e+06	1.34799e+06	1.05341e+06	1.3852e+06	722948	2.19129e+06	771521	1.27575e+06	545401	791221	795655	497597
M449T36_2	449.397	36.431								139903	193232	112191	16426	26720.9	153533	163361	109877	109428	68369.1	48777.1	20160.3	50085.2	51902.9	50162.8
M334T36_2	334.309	36.401								75430.7	74973.9	125870	33591.7	37035.4	69206.6	67694.1	76042.5	30524	70848.5	58757.9	43200.9	86204	85150.5	85045.6
M251T186	251.047	185.727								2682.67	2243.45	1787.06	400614	7652.28	4372.72	3157.81	4122.48	3256.15	4903.92	3039.84	5949.87	4403.62	4855.88	4850.47
M289T299	288.983	299.128								84745.6	80009.3	90689.1	17339.4	147120	147495	132879	216849	196055	232098	154626	221629	216822	211434	216997
M580T340	580.47	340.271								163662	243972	260233	129.964	204697	357123	230689	803898	399512	423527	322057	919630	606524	608785	612256
M589T263	589.169	263.385								9964.42	15139.6	27585.5	14.6628	5371.41	44793.7	5150.74	116222	17435.7	254111	4587.32	100953	125644	125669	127674
M175T524	175.118	523.712								1.51095e+06	399846	884829	892052	889186	1.27201e+06	1.24063e+06	1.87856e+06	1.77652e+06	1.32548e+06	1.20266e+06	426548	2.24453e+06	2.31535e+06	2.31296e+06
M674T39	673.524	39.395								34613.7	24829.8	23163.3	11834.8	47031.2	30688.6	54809.5	63357.3	79164.1	53299.1	43955	46759.4	53781	53220.5	51181.7
M276T489	276.071	489.315								82320	55493.9	58926.3	10696.9	43662.5	53061.1	48237.3	124569	84135.5	123045	52243.5	168551	118666	116165	118670
M249T156	249.027	155.846								126582	141005	215327	92914.5	256291	258631	137261	288889	188589	526989	220493	430968	326492	316144	326976
M665T347	664.504	347.248								10787	9950.05	12979.5	135.063	14892.9	36956.8	7911.95	163301	40562.9	163168	21053.4	264556	124327	125339	124319
M261T481	261.035	480.799								75184.1	93244.5	118027	16132.6	83694.5	113213	64473.2	85473.6	53080.4	99970.5	40221.9	224934	144109	144110	144857
M275T355_1	274.909	355.442								495731	743478	512078	616955	577714	511169	594721	347861	483752	362326	574280	285346	374034	374013	368610
M497T208_1	497.058	208.172								252839	263634	297918	94.6606	297010	295361	549217	360331	347443	321737	544463	861324	369636	336358	323503
M779T142	778.54	141.866								165784	132566	221881	184986	164099	270585	327724	173875	237749	157357	272901	145921	136718	148014	136574
M961T341	960.962	341.136								74666.4	129231	148780	78.0787	111878	227149	104675	685561	296497	346714	223505	774922	370917	392128	371011
M805T136_1	804.55	136.403								289510	332721	330123	222573	173067	430891	352300	186617	231799	129871	184967	159213	146770	152321	152547
M245T38	245.226	37.693								31881.8	41552.8	16200.1	16359.6	18426.5	108330	53329.2	45626.8	57434.4	26980.6	29013.1	25291.1	35541.1	33792.1	33830.8
M211T277	211.074	277.118								921504	541575	1.03992e+06	315494	626004	938991	898834	419954	885147	304675	884295	168777	440351	412626	412998
M635T34_1	634.537	33.558								143263	155142	173045	26898.1	32659.4	64760.1	25003.5	15736.7	43336.7	20479.8	53603.6	77740.4	14144.2	14225.6	15273.9
M193T37	193.158	36.767								117830	61203.8	131114	57833	92250.2	150677	147789	102160	133825	54385	52382	44500.7	108211	108170	102506
M239T49	239.2	48.572								81396.5	168767	35944.6	17955	155044	118586	222595	139475	416095	33077.9	65012.9	53597.4	24547.2	32686.6	32660.4
M361T308	360.923	307.526								25368.3	43773.1	39683.2	1619.77	40695	72903.6	45711.1	177724	89028.8	176219	55902.4	270593	132900	127949	127909
M990T343_1	989.982	342.533								47881.6	67547.8	70055.5	182.103	57829	118750	58461.6	508486	158793	319351	117508	390017	291390	291618	298413
M753T237	753.446	237.425								156384	57035	55167.4	5046.85	21564.5	25172.6	43194.5	136973	21215.9	96650.8	17423.6	25083.9	143367	142296	143365
M444T37_2	444.33	37.262								68464.7	37263.5	54392	9886.65	60769.6	64371	63310.7	95102.8	105953	88248.6	54863.3	84769.7	81119.3	78061.3	80636
M524T454	524.055	453.992								196268	166846	179660	41775.9	151147	200174	150243	244074	231879	274839	155594	277320	258414	254783	255260
M212T142	212.163	142.255								238826	287883	187614	41939.5	469728	230041	253437	437951	493971	230868	222933	244737	718313	687971	687934
M1071T34	1070.75	33.545								85069.1	62842	65662.2	11873.3	10954.9	73974.5	44594.9	11139.3	14989	9355.72	12255.9	14022	9120.5	9096.75	10076.2
M791T139_1	790.617	139.126								389554	369062	313019	146279	134186	167545	112447	75378.8	166723	115652	179569	139983	54026.5	56934	57050
M137T436	137.07	435.565								215337	183602	226998	38443.1	212261	172137	295718	510118	351469	536970	366873	666393	450351	449738	449345
M670T34_3	670.465	33.926								128257	92584.1	125327	27828.2	22944.5	124080	48397.8	38034.3	29642.7	16574.8	24308.3	37577.1	16338.3	14165.6	16228.1
M254T218	254.102	217.872								25554.3	26027.9	28827.9	2942.63	22658.3	47697.1	23968.6	77353.7	59899.8	513.707	29099	86749.4	21704.4	23490	21710.6
M357T355	357.061	354.699								8757.86	5997.13	10199.3	241.774	3902.89	26248.3	3527.08	145988	25620.6	147788	7328.19	254366	136602	134837	134829
M370T38_2	370.33	38.015								67808.5	81920.8	68299.1	24185.1	84112.5	54998.2	81146	113629	113970	126333	72035	84166.6	76736.9	73428.9	73367.4
M454T166	454.387	166.231								167102	137203	201240	26689.3	32354.7	153312	188155	122311	94299.8	78332.3	71460.2	6837.65	100201	100993	101008
M414T299_1	413.997	299.128								44150.3	57660.7	60355.2	4658.15	98050.9	126142	86444.1	205940	157770	223420	116723	236651	202912	194962	202905
M242T36_3	242.247	35.9215								43252.5	27985.5	51893.6	17999.4	45563.8	60395.3	74889.1	125405	85193.9	121395	28316.6	38928.1	122488	126975	126998
M609T34_1	608.521	33.6655								112906	120807	148672	22496	23844.6	50124.8	19829.9	15727.7	45691	20788.3	51767.6	63161.2	12930.1	12952	13551.5
M216T349	216.02	348.538								135579	136916	162351	3008.07	132206	209423	112698	273217	182096	282571	136620	347218	297537	292505	292505
M819T40	818.601	40.035								162045	183504	135635	36691.1	28337.4	158698	508270	48522.9	88252.6	46725.8	37306.9	118056	61982.6	59805.4	61887.8
M345T315	345	315.195								184126	168685	216208	1266.14	159739	231264	174925	377751	250867	365256	177997	471531	322960	320307	320299
M70T72	70.0647	71.515								255775	374568	385545	47398.1	267154	522680	276620	606559	465144	942839	384913	534586	691315	688017	691304
M356T35_2	356.28	34.716								111952	138345	62290.1	22461	77234.9	86842.8	119884	151492	144789	135691	67719.2	57613	87067.9	92438.5	92145.5
M284T144	284.294	143.846								131016	157443	156880	42915.9	76027.3	148070	282008	192633	80997.5	157451	117319	56335.3	191060	205276	205036
M301T334	300.945	333.979								13570.6	13429.1	16717.4	395.997	9459.59	23719.4	8456.57	104540	11774.8	98158.2	4388.72	279210	66909.9	66825.1	67411.5
M159T284	159.064	284.288								50384.8	44634.6	62420.5	11480.1	55982.4	56363.6	180444	15568.2	205281	17057.6	192441	40328	33463.6	34056.6	34058.5
M148T216	148.042	215.662								165650	157756	192447	23930.7	119015	121730	119330	100101	100790	83636.6	81750.1	115371	85503.9	85561.3	78582
M295T38_2	295.226	37.8785								62979.8	63862	30367.8	89990.2	101349	53662.9	117162	134188	236162	50950.4	88479.6	62784.5	43252.2	49749.3	41935.8
M151T38	151.111	37.693								57433.1	36416.1	16929.9	6303.9	69136.8	40498.7	67621.5	217993	83120.7	19690.6	68448.3	100070	108121	61913.8	107992
M167T152	167.08	151.833								185760	169276	225559	35265.8	131965	192721	275272	82381	225279	533846	227914	839930	262890	204759	263408
M512T348	512.479	347.893								50964.5	55302.6	66797	92483.5	44997.5	86235.8	34868.9	235031	97840.6	198198	57527.2	241501	213557	213558	216743
M473T335	472.937	335.313								77987.5	69043.6	71352.1	498.998	65917.8	93628.3	76585.2	289282	92232.8	237890	108949	402442	241032	235987	235998
M937T343	937.001	342.866								28153.1	43392.8	66637.5	24.8461	34770.9	103115	45145	341384	144402	324741	94130.4	651663	276731	276736	279531
M301T37_3	301.29	37.415								77675.5	76707.9	67205.9	23674.3	25772.9	77373.7	97185.9	119661	61316.6	86813.5	31334.7	27832.8	104082	104082	96903.3
M811T60	810.594	59.7705								69805.7	104476	94381.6	403.19	1061.14	177073	841915	17332	145750	23111.2	829.981	98629.4	17202.7	17203.4	16990.8
M186T261	186.075	260.805								123272	130145	218003	12957.9	155478	215722	111066	228773	146820	405064	151717	340366	286431	284301	284319
M650T342	650.492	342.321								74998.4	141696	141529	311.874	102642	221604	111852	530268	272555	447706	228151	515227	512882	508574	512880
M662T342_2	662.472	342.212								116539	196057	190131	362.112	154064	282708	190030	769431	343767	610639	285258	474209	479086	434996	448240
M268T356	268.013	355.746								45621.5	54367	62941.6	2666.88	45610.2	82353.2	39866.8	224416	87627.4	218899	56907.1	371442	209418	206726	206737
M836T139	835.598	139.29								334980	353133	346905	153110	16817.8	316569	146750	71050.9	109018	79430.3	99775.5	91572.1	53632.5	57422.2	54281
M336T389_2	336.087	389.118								359481	322743	319682	100024	299375	303269	397093	315378	301248	156686	300495	284174	323713	317786	317778
M215T497	215.015	496.544								90585.5	81578.4	142087	13002.3	124687	74087.6	81349.5	85208.6	115917	207222	66390.8	532129	147474	153690	147616
M191T427	190.976	427.266								129784	132152	95288.3	10740.3	67712	153954	134604	290076	155274	234353	82607.3	318942	249698	246391	249735
M703T342	703.474	341.567								84314.9	180692	173437	222387	118155	256532	133880	655476	287741	569329	241682	450258	372008	371961	375470
M723T146_2	722.589	146.238								274221	219847	154511	87676.1	83938.9	151508	74149.6	48034.9	77582.6	60203.6	116365	76028.8	25823.6	25832.4	26823.9
M332T386	332.093	386.063								46461.1	50742.9	59797.9	7549.99	40762.2	59379.4	58150.3	187388	102101	190983	79954.7	315123	157981	158178	146660
M414T38	413.906	37.612								38611.7	34723	52057.4	15538.3	51649.8	67795.3	51213.2	66510.1	44643.6	61634.3	39678.5	79852.1	71916.1	66541.4	66528.8
M253T37	253.25	37.018								8317.58	33098.6	4738.25	2013.87	15330.3	27064.7	26670.9	270749	31160.4	6310.42	16662.4	5477.33	5778.4	6511.74	6494.17
M265T381	265.11	380.619								167691	225723	235682	49930.3	280516	248158	120018	393246	260365	452311	221221	750750	358271	371650	357856
M179T37_2	179.142	37.365								6134.56	3642.79	3379.08	4374.68	9163.84	4134.7	8769.02	11450.3	14841.2	7592.72	19547.8	5307.38	7771.52	8849.39	13821.5
M450T37	450.231	36.767								734.917	14832.3	27448.8	119375	52979.2	13739.3	32052.7	14482.1	69388.9	15731.3	53039.2	16861.9	64469.2	65684	64490.1
M717T347	717.487	347.248								14113.2	20428.4	24422.6	46160.6	11126	40603.4	13722.2	186073	43374	145421	25022.4	228721	135157	133607	135188
M304T310	303.937	310.015								61530.6	62808.3	66350.9	6888.74	60237.9	82059.7	64138.2	205459	114160	173706	74600.7	257048	159299	157628	157634
M155T39	155.106	38.88								60535.8	71375.4	29068	19967.7	145731	66206.2	146131	181947	259121	91752.7	145693	65977.3	61391.4	61287.3	54864.9
M443T314	442.977	314.258								147191	121878	161518	652.808	117515	185290	132419	320258	201360	325610	140887	417046	286614	283983	286635
M285T427	284.958	426.807								26875.3	26081.8	14643	1486.73	6298.15	34556.3	29219.2	146449	35613.4	83494.3	8772.01	214682	101770	99803.7	101765
M294T327	294.037	326.606								79504.1	62109.4	231988	22443.5	218072	289954	94557.2	24850.7	90503.1	153154	92440.1	6007.96	121507	123719	121499
M650T159	650.436	158.793								160894	50135.3	61698.3	20505.2	135479	142793	259746	247387	178490	112009	104557	56891.2	234223	235367	237281
M324T335	324.039	334.649								18792.5	17216.7	20448.8	533.103	14484.9	27180	15323.4	139157	27100.4	103291	17188.9	355192	79210	79191.3	77804.6
M383T35	383.328	35.475								160424	156289	186173	44368.1	44775.2	145307	82162.3	64008.6	131232	44014.9	74520.5	61088.3	55227.6	55262.4	47218.2
M251T299	251.035	298.945								45657	43423.7	44118	3458.55	58152.2	81080.7	64024.6	153904	102157	151193	73768	170171	134419	134416	137898
M422T172	422.324	172.168								193848	190453	183228	32005.6	146471	260360	173996	237585	284678	248243	172118	12967.8	182243	169606	182216
M480T180	480.307	180.181								207132	192420	203079	28358.2	57189.5	203258	202175	63559.6	100490	84704.3	84111.5	29266.3	76241.6	75880.3	92105.6
M744T342_2	744.475	341.995								85580.8	177411	174471	270.51	115093	250389	136417	716992	299042	450247	226061	539647	438924	432952	451342
M412T171	412.34	171.185								174438	159408	156948	27321.2	78194.3	156668	174442	202062	236653	201290	149964	9161.78	164798	164842	158069
M737T33	736.54	32.98								122481	123108	112917	85159.6	110894	151519	98508.4	36092.5	84207.2	34155.7	74311.8	71120.5	25322.8	25205.4	26743.5
M251T30	251.045	30.026								349304	4865.25	4455.52	1269.33	4891.24	5763.25	5854.56	12984.2	6835.96	10332.8	515674	4269.23	12374.6	12382.6	12575.7
M633T34_2	632.631	33.549								150525	116943	107502	13810.5	8216.86	12949.4	9605.71	5379.79	28238.4	15227.6	24942.6	37849.9	8186.19	8182.42	7962.64
M271T162	271.115	162.32								112290	129095	195982	18367.7	147449	213174	90085.9	208463	122281	395537	101808	401525	299364	299424	319171
M263T37	263.236	37.437								107804	95088.5	60458.6	31858.3	77020.3	58284.7	128603	149661	125474	149463	73131.7	47869.3	116182	111584	113592
M373T314	372.828	313.683								348592	309374	337158	3588.41	275919	371536	341932	534840	450446	567174	340811	519165	513435	508303	513444
M262T107	262.237	106.749								351277	389169	354161	68703.6	427350	429045	287171	432858	437747	434636	300585	222211	266495	260136	262366
M466T267	466.221	266.829								213448	201269	213170	1085.95	129582	252020	121204	362900	231234	312194	112856	196959	345755	341379	341460
M387T356	387.07	356.182								8860.6	7675.15	8917.62	60.7932	3585.57	14750.9	4248.32	116053	15145.6	112386	5226.04	268956	93877.6	90386.6	90361.2
M373T37_3	373.345	37.437								67936.8	77423.3	21827.4	5693.6	54900.1	64530.3	68507.3	43940.1	83305.8	15798	48037.4	65248.6	100481	100406	60797.1
M594T347	594.482	347.491								38515.3	39873.4	50933.4	79856.6	30935.1	80392.3	30310.6	222129	82646.5	209299	44487	276417	202788	200241	200231
M386T37_2	386.325	37.142								65868.8	44587.1	83663.9	14229.9	78861.9	103064	91590.1	76080.6	122158	30847.8	62161.7	59706.2	50609.5	57200.3	57355.5
M635T347	635.482	347.39								25344	34804.1	44789.3	68300.7	30728.9	70608.2	22696.2	190880	67533.8	180947	34637.6	259676	178102	175929	175936
M510T36_2	510.485	35.513								100134	137936	107769	10104.2	7179.15	67714.6	35443.4	14792.4	14661.1	10239.8	16236.2	21177.1	4034.45	5037.7	5007.66
M1002T343	1001.96	343.123								66189.5	111503	123657	22.7598	92985.7	169192	99561.5	357673	234600	328280	188304	390245	325946	326155	337237
M257T207	257.155	206.709								76986.6	94326.9	24798.6	4403.75	27974.9	53098.5	47732.4	15112.4	62945.3	8594.2	21441.6	11616.8	5685.4	5606.36	6896.56
M319T356	318.899	355.571								393050	439939	563904	532365	595978	371975	461555	289349	386612	276628	480871	245242	292610	292603	290264
M287T351	287.069	351.245								189142	163687	232175	695.399	174641	263616	137339	194098	185957	257827	141463	219172	239731	234143	239766
M218T77_2	218.21	76.726								407016	367455	561970	68803.9	519878	402718	490467	593879	567359	875363	602505	101757	596022	667172	666584
M449T339	448.975	338.655								210893	252734	302522	462.76	201284	359371	227805	308603	373482	305095	314209	488596	303133	299739	301962
M493T340	492.906	340.381								290334	209060	324540	1157.8	322479	360654	328974	113949	300145	169736	216795	101280	212866	236694	214221
M365T302	364.903	302.308								294751	177565	186075	2969.23	60253.4	101218	47790.1	99983.7	61358.2	73151	48234.9	106426	75754	75755.8	73649
M732T343	732.495	342.533								42061	93803.2	90457	135.257	73041	163786	77178.6	597321	233602	335950	134832	452992	296027	311440	311254
M802T343	802.014	342.85								35403.2	62060.3	60561.8	51.8813	62142.6	127736	59896.8	383184	158169	293030	110036	258728	287671	293529	287886
M531T34	531.271	34.15								64986	57375.5	84376.2	13309.7	23800.4	70725.8	53805.5	103273	63885.6	97296.5	28514.7	43251.9	87405	89442.7	89453.6
M684T453_2	684.074	453.445								56309.4	48197.9	63400.5	5581	60032.4	84498	59287.5	91637.8	94791	132309	62799.5	137445	101655	97019.6	96941.7
M850T340	849.938	340.469								169507	267908	247527	282.852	211580	321360	232332	649392	371129	560318	360655	671330	420763	420871	440521
M807T95	806.565	94.613								220958	207425	51080.1	484.392	621.047	60540.8	330303	7414.59	534699	8142.1	1617.26	15745.8	10725.8	10646.6	11743.5
M691T342_2	691.493	342.253								61128.3	103195	109552	96.6585	78010.6	174905	92573.6	638184	211051	368631	177959	756514	348471	347665	359579
M309T338	308.932	337.964								315619	341038	328386	6252.67	260178	293044	335381	456668	214387	404539	299844	260146	389620	335990	389843
M497T480	497.115	480.016								13837.8	8755.09	23709.2	4417.71	17723.2	29673.5	17449.9	54765.6	43090	64720.8	26408	131523	47780.4	46982	46973
M189T35	189.163	35.437								41455.9	66726.4	34973.2	8606.78	46918	49561.4	74524.8	98790	111306	84416.5	49288.1	111158	62513.6	63447.4	63450.1
M820T133	819.604	133.407								293953	370511	323825	124173	60896.3	285475	100618	48386.9	79296.5	39671	69419.3	77586.9	31310.2	34134.6	34481.7
M239T70	239.148	69.787								528340	367092	343584	48966.1	362593	407921	374144	453102	531310	489826	268866	429202	499415	472796	472053
M136T436	136.06	436.378								254120	238857	160376	77525	206373	156435	195693	185469	205483	274819	153838	314805	260078	267078	261358
M347T239	346.995	238.803								137439	94166.3	111889	5542.09	113499	120286	133971	170572	137221	195771	136700	276781	200045	191262	191685
M340T309	340.055	309.223								277793	276410	274231	491.369	271615	273874	248331	270713	249350	276510	240903	268022	269108	269150	266652
M713T181	713.064	180.796								631390	578037	448493	335883	845573	632683	417614	432454	366819	628282	388046	620105	510028	271700	405099
M681T147	680.509	147.425								168784	173276	235082	58286.3	48044.8	150515	105038	34082.3	36896.8	26348	45340.7	27816.7	21526.7	19848.2	23063.3
M225T481	225.015	480.803								57471.3	71252.8	98087.6	12747.7	71180.8	94015.5	37273.8	69778.1	39202.8	80758.5	17572.1	190562	110505	114416	111037
M202T281	202.106	281.376								210574	198337	211045	28520.7	207091	201384	217740	47012.6	206867	70997.9	196228	44619.9	131579	136372	131589
M351T40	351.287	40.169								21943.2	41087.8	14349.3	3608.46	39964.7	25265.6	54797.9	31804.1	91660.8	14387.6	28714.6	25273.5	15606.3	15823.2	18799.5
M687T453_2	687.078	453.407								105175	101215	110885	37164.3	104859	142731	105134	149232	147442	185317	118028	196821	156959	153648	153656
M243T324	243.037	323.937								6994.62	8390.78	8351.32	2383.01	8050.71	8784.8	8878.75	4866.83	11142.2	11868.2	9443.76	265667	12523.1	12924.2	12020
M527T342_3	527.488	341.995								88820.4	145856	159410	212070	116157	238967	144255	650436	267330	363254	212723	408584	367645	379286	367899
M348T96	348.309	95.856								551972	237376	603392	72760.6	500521	612031	540862	1.02929e+06	622065	331882	757582	208952	704285	749251	749440
M137T448	137.07	448.132								153505	123264	153561	24225.9	135458	124896	191448	294376	521451	336297	187723	411807	274113	269437	274094
M137T479	137.07	478.979								93856.6	97556	127459	19979	120424	85593.8	145555	274224	186468	265837	101594	896665	275562	309173	274952
M271T51_2	271.225	50.906								80240.5	118334	42379.4	10663.4	141209	100247	108210	131686	254312	47809.3	126315	19987.8	32965.1	32932.3	36434.2
M346T68	346.33	67.871								376499	438497	249289	114366	289364	195616	266828	302029	518059	284730	383222	19367.4	264170	264089	261256
M415T337	414.896	336.725								24015.4	22779	27731.4	2480.18	18812.1	27501	19314.1	78675.7	19526.4	79453.5	18088	14442.5	46751.8	45300.8	45315.4
M517T398	517.127	397.57								95751.6	81773.7	90088.7	3109.43	87036.3	92280.4	107742	217744	125930	83098.6	86322.2	149843	148151	143656	146876
M775T154	774.561	154.37								204622	210668	263139	49540.2	48203.8	234308	110213	54380	275693	26660.4	104456	16597.5	40650.1	41066.1	39869.9
M174T51_1	174.054	51.2								50533.4	52509.6	48894.7	28173	152822	99357.2	110199	162937	84105.4	131189	70422	64085.6	165871	165886	171383
M301T343	301.139	342.629								719193	586675	785976	278218	698462	844604	774792	1.34013e+06	855522	1.26672e+06	855745	1.47729e+06	1.13171e+06	1.13025e+06	1.14428e+06
M237T292_2	236.942	292.161								3904.58	9930.97	5729.56	4527.81	8369.16	10523.3	11276.9	5043	211404	4038.66	6532.41	3024.91	4682.41	4681.11	4615.41
M151T40	151.074	39.6575								2127.96	1834.04	1682.62	3327.57	4786.9	2827.11	2250.89	1970.19	3787.76	1664.49	1405.77	1578.56	3899.97	3653.93	7729.6
M747T347	746.506	346.938								4864.2	4106.05	9399.47	26700.3	3797.78	21715.9	4801.81	127603	22822.5	97787.7	9824.08	200642	93265.6	92405.1	93266.3
M531T320	530.816	320.017								14083	8300.44	15767.1	1014.8	13491.2	14689	13747.9	6398.72	11655.3	7957.5	13148.9	109770	10391.9	10385.7	8861.33
M84T378_2	84.0437	378.437								504601	505858	476861	107540	425874	402747	171038	244554	150285	198537	165102	411157	401448	401430	406529
M152T249	152.056	248.931								69308.7	111915	203776	95335	103098	364716	46658.7	363287	174868	659740	145797	672063	396590	388268	388123
M1055T341_1	1054.94	341.245								157291	225123	223173	149.338	170342	338680	195086	749749	364725	622277	338474	443499	530263	493109	529953
M181T38_2	181.121	37.5065								69132.1	78967.9	22934.2	4644.34	158514	85138.1	156977	149980	264415	90416.3	113681	83561.1	28750.4	38405	38183.3
M240T108	240.195	108.253								152709	154223	96569.7	6559.01	153210	99700.2	64247.3	161117	96874.8	99709.9	91630.7	104395	90656.6	88585.7	92725.8
M311T35_1	311.256	34.505								143622	144675	148255	27940.4	137452	89667.4	193802	83827.1	299806	47092.9	177472	124890	22058.1	23073.2	23084.2
M459T308	458.9	307.89								16431.2	27729.4	24464.2	647.189	24469.5	48801	24987.9	141934	60619.2	128002	32349.8	229650	95360.2	95388.5	89722.7
M785T342_2	785.477	342.428								58235.3	108466	108237	127.471	86304.3	172168	82450.8	322033	202777	431066	172111	363388	315544	315268	326363
M225T45	225.11	44.945								26090.1	6950.84	4947.27	1839.84	26014.9	14916.2	27533.3	12213	54093.2	13231.1	19994.9	120860	14711.1	10868.4	14742.4
M262T441	262.102	440.658								56064.2	63147.9	114822	30576.1	80509.8	97650.4	123556	202294	116990	233650	118146	227228	151635	149900	149852
M306T290	305.962	290.39								14498.2	10129.6	10459.4	3556.03	8859.44	3578.93	6761	4362.3	78835.2	239764	3834.84	5163.73	212195	201499	212162
M374T37_2	374.301	36.7515								82482.9	83469.3	93023.5	27785.2	37363	70080.4	57507.2	59754.9	65018.8	66044.4	38160.4	38640.5	72318.9	72325.9	74045.7
M374T37_1	374.25	37.041								3921.29	5409.98	15564.3	264.568	6236.47	4892.31	4103.45	6597.65	13061.9	6443	7024.7	8015.9	6758.11	10549.7	6681.83
M717T210	717.059	209.572								205038	231443	285970	12.447	251797	300540	440314	485166	351354	558700	447154	704822	296835	296577	303991
M758T347	758.488	347.39								11946.3	14619.9	17687.4	41483.6	12891.1	44272.4	9919.09	154834	43973.6	128125	13690.5	198570	119312	122915	122921
M1089T343	1089.02	342.629								195863	344394	344587	177.016	306394	335591	287831	423604	315624	580675	342941	632283	306407	375398	343824
M399T483	399.143	483.089								268063	415108	409727	346701	276231	259760	279654	439482	408820	384693	342279	236835	218784	203515	203337
M541T340	540.946	339.764								454423	546778	549027	18641.9	485949	607341	518282	327531	629213	793531	632077	918462	745164	737474	737480
M127T239	127.055	239.315								53970.4	25471.8	3124.77	1785.72	25955.4	19485.8	34004.9	175756	64987.4	85886.6	4324.87	111409	37504	38180.6	37192.1
M329T34	329.154	34.4295								50685.8	61984.1	14856.9	15314.9	61264.1	28343.8	59711.2	78553	78820.9	87254.7	44633.8	75228.1	82622.3	84415.5	82612.9
M329T42	329.232	42.182								122425	79434.2	28108.1	40352.8	80326.1	57955.7	43430.3	56544.8	116658	44250.7	71426.5	165885	110426	111329	62688.9
M879T342_2	879.462	342.106								50541.4	99605.8	94793.4	48.7978	73265.4	155423	83482.7	258180	165368	314414	120337	251697	253807	258336	260027
M940T442_1	939.64	441.967								44892.8	40163.5	38586.7	1322.85	35457.8	53402.2	26475.1	100895	56380.3	105636	28954.6	149521	97607	99289.2	98977.8
M471T314_1	470.804	313.683								259298	238300	264960	324.184	211316	301796	255421	440560	361767	468829	263900	417422	428039	425010	429016
M876T453	876.135	452.956								73327.4	44455.6	31727	1806.96	25325.1	32749.4	35754.4	148287	92147.7	82494.8	37410.6	114753	122918	122032	122658
M405T35_1	405.262	34.901								92046.7	82205.9	108137	21941.8	92157.9	103207	98519.6	157220	160403	160376	102861	127084	158433	155505	158446
M249T34	249.184	34.177								94281.9	116619	67944	22474.2	94784.5	132586	159117	149577	183943	129364	71563	72667	88043.5	88063.9	82993.2
M367T476	367.138	476.223								312124	138300	101820	945.177	59557.6	84404.8	14912.2	80252.7	7470.45	7627.33	6306.1	44703.8	200830	198556	200830
M173T361	173.029	361.258								36516.2	36508	33124.2	2237.28	35852.3	47005.1	31326	100531	47727.4	97735.9	36314	180369	84747.7	83975.5	83972.9
M749T135	748.525	134.878								416822	401142	391983	136501	53532.4	215116	102320	66605.3	98369.2	98791.6	73027.8	93145	48910.2	51523.8	51488.4
M138T261	138.054	260.805								107663	107850	171193	8435.62	120852	179425	99496.2	191946	126646	322787	126891	317766	237412	239073	239074
M446T38	446.252	37.77								47586.5	39192.7	65332.5	79297	76657.6	4794.16	33699.5	71386.8	54850.4	66061.9	53593.7	84802.9	73568.8	73616.7	79032.4
M195T37_1	195.137	36.919								67594.2	105698	58869.4	9777.19	134245	119356	106919	124242	238873	151970	117892	106971	88846.5	77686.8	88865.8
M814T343	814.499	342.629								30797.5	41460.4	65754.3	56.0193	38816.5	94301	42575.4	306968	120735	270021	95628.7	302740	244636	244867	236661
M198T405	198.037	405.053								131498	137207	125419	35929.1	117314	150248	152906	193296	175614	183040	150545	179159	173443	172258	173432
M491T349_1	491.055	348.776								74468.8	65828.1	91636.6	98350.6	63186.2	112768	49479.5	178912	98372.7	180587	58576.7	234724	185566	184590	184600
M689T145	688.523	144.516								150995	152710	200427	79081.4	58650.7	207676	163729	61838.2	78844	52342.1	77186.2	61343.4	45904.7	47213.8	46688.5
M630T34	629.547	33.641								122439	133687	148651	21369.4	19096.6	40090.7	21655.7	13326.1	33782.4	12759.7	28201.9	31374.1	9280.05	9542.49	9539.16
M121T37	121.1	37.365								41768.9	66204.2	26062.2	10241.1	99768.9	64871.8	99355.9	89988.9	156965	54218.8	78165.4	41323.5	29372.5	27785.5	38877.6
M586T350_1	586.051	349.853								9949.1	16318.1	20663.7	20.9717	11509.3	30904.6	16880.5	84949.8	31538.6	111643	22147.9	186074	77407	72767.3	77284.1
M279T52	279.23	51.56								27845.8	8970.45	5544.68	1121.03	53438.9	12358.2	56274	68976.1	61545.5	5122.19	12024.8	78734	31076.2	14168.5	13928.8
M212T111_3	212.236	110.731								2790.48	2440.19	2438.03	840.911	1385.91	8639.49	99503.1	39968.5	1394.6	14524.1	1262.43	328297	15375.6	15846	15831.2
M576T79	575.501	79.2525								682006	497878	683612	164060	98911.1	336121	41553.5	10528.8	26645	12921.3	73668.9	23169.6	10148.6	10193.9	10662.7
M415T36	415.319	36.086								30647.6	36860.1	20721.1	39926.2	16503.7	31421.8	22176.9	42161.2	48279.8	27203.3	30267.5	10313.8	46534.5	33775.8	33359.5
M163T37	163.11	37.365								14617.1	16890.5	4804.62	127625	33249.4	18283.2	33258.1	33745.4	48504.8	6715.57	22243.7	11949.7	9092.2	12291.4	12239.5
M666T389_1	665.743	388.508								31821	26351.3	16247.7	69.2844	26209.2	10109.3	44986.9	105416	39403.7	3645.5	8771.26	27744.2	53304.7	56308	53307.1
M777T337_2	776.986	336.789								41489	58475	64087.2	61.0311	51449.4	77299.9	53576.2	240998	85903.6	188707	66562	394342	194120	181685	181522
M303T111_2	303.346	110.866								8730.43	5384.03	7294.49	2045.92	3187.29	11626.2	285001	45667.4	9080.6	5260.45	4047.22	6657.62	4734.57	4706.9	4212.45
M501T37_1	501.281	37.437								79458.3	62066.6	59480.6	33378.7	62330.6	85914.8	139870	119757	123314	114090	21115	22078.5	98102.3	101759	97394.3
M787T196	786.595	196.107								29877.8	26402.1	28651.7	13252.1	65844.7	36679.7	42981	39885.4	150515	44074.7	137860	37612	14460.4	31085.3	41041.3
M524T348	524.459	348.197								65456.7	77496.3	86209.1	105976	70696.8	118568	60382.8	189783	103732	188826	90599.1	193234	193805	193802	192820
M133T292	133.031	291.545								436892	338135	397524	89131.8	312210	322722	226991	393608	169966	258358	128151	503258	357703	359176	357702
M355T29_2	355.151	29.373								8050.92	7636.96	6512.98	3409.3	5605.32	7656.85	6152.9	7987.43	80544.4	8002.01	5289.4	179378	10049.8	9727.96	9722.99
M675T181	674.528	181.093								172917	182015	179704	19373.4	19713.1	146896	102245	35672.7	35512.3	13299.6	48710	13278.2	18238.4	18282.2	18940.4
M175T581	175.118	581.173								720768	355261	421853	113355	352957	759073	718001	282063	865509	654556	716335	476823	679766	738635	737402
M799T347	799.49	346.94								6423.94	7606.65	15815.4	21.2243	6671.68	25211.4	7472.19	141318	27666.5	105508	18175.5	200173	97818.5	97814.9	97130.1
M773T343_2	773.496	342.85								29852.9	60735.9	78255.8	83.7679	54823.6	136914	53055.2	320105	152522	289366	105943	407545	258655	261796	258676
M381T37	381.299	36.963								85872.8	78077.5	62813.6	38515.1	47351	59541.3	66066.9	29570.1	105426	32198.5	42790.5	36913	37452.6	42041.6	38372.8
M459T339	458.942	339.253								411092	514331	260060	29128.4	435518	260001	484384	686935	289633	652332	545755	677630	464191	465410	495492
M274T386	274.091	386.429								82272.6	52621.2	89573.4	14236.9	41376.2	69795.6	77875.7	173256	125032	190387	141672	241161	141156	137406	137099
M544T184	544.336	184.46								127368	86214	230968	8917.19	150709	121005	82050.3	486629	180712	204945	98166.6	113115	168790	168782	166686
M239T37_3	239.236	36.953								69277.5	75735.2	69998.1	35610.6	18936.6	84780.2	65078.5	42681.1	48691.6	101589	32609.7	25575.7	54228.3	54362.6	43859
M264T239	264.124	239.315								83090.4	16401.7	3778.7	3466.25	27148.4	6026.75	33708.2	160614	52999.7	73642.2	4651.26	63167.9	39038	39044.5	39657.1
M623T342	622.949	342.043								571354	663175	560654	7136.13	599634	573946	710138	512237	592066	545257	512890	520303	510330	565374	497971
M716T179	715.571	178.543								198701	178581	197805	26910.2	22596.3	111520	51297.7	5938.32	31602	6350.85	31776.4	9312.71	5139.57	8383.81	8439.99
M826T342_2	826.478	341.768								53276.3	99015.7	105623	151.138	74799.6	153431	83816.4	323665	194619	338694	147981	381298	371401	367491	367487
M661T34_1	660.552	33.551								95298.6	98482.6	103646	19501.1	12922.7	46853.4	17640.7	15141.8	27138.5	16677.3	32313	41708.7	7877.77	8991.95	7906.81
M84T427	84.0436	427.329								293694	282310	279002	61103.4	243650	282631	225119	308197	223040	281905	235052	317547	332187	329257	329312
M274T208	274.181	208.153								92110.2	110929	27316.6	8290.51	32018.8	60254.8	54770.9	37226.2	70122.4	24839.8	30207.8	9171.42	12058.4	12340.2	12340.1
M709T209	709.07	208.927								151993	189967	297456	18.8519	268544	261231	370385	400203	288812	467394	376344	699621	253332	252016	275440
M403T34	403.232	33.601								28194.8	50088.5	35064.8	11534.4	89847.4	58248.2	65907.4	56606.3	59673.7	81435.2	57346.1	79929.5	64510	64662.3	61338.1
M399T550	399.144	550.496								305506	322035	400395	152385	337362	518053	391768	386034	466658	390371	308333	373186	310469	259545	310776
M487T427_1	486.922	427.142								19584.4	21308.9	12166.3	483.85	6554.32	28392.2	22110.2	107235	30446.9	69068.6	8339.08	162792	76830.5	74543.8	74682.3
M281T240	281.095	239.593								98700.7	27462.1	5112.97	4946.44	30874.2	15092.8	38542.2	183815	81531.3	71965.3	2635.4	67761.7	52314.4	53122.4	52310.4
M327T39_2	327.251	39.0075								59864.3	91002.7	23438.4	7212.33	84648.1	59590.1	124548	126685	196435	49710.3	74295.9	52914.4	35808.1	28378.6	35923.1
M655T349	655.06	348.538								39876.7	38584.5	58455.9	68262.4	44507.7	77002.1	33052	139052	63076.9	135395	46137.3	211550	140501	140495	141436
M464T34	464.373	34.203								110861	124622	140320	65251.3	80906.6	146128	117837	130285	100524	120376	63496.8	89417.2	111218	107747	107749
M831T134	830.563	134.392								211972	235347	233199	129482	160812	292809	167523	86127.1	100907	60321.6	83156.2	72017.2	61649.9	65503.5	62056
M787T199	786.524	198.673								167000	140044	112730	11877.3	9311.87	29561.8	10097.1	5153.51	1804.85	7417.02	3155.81	10564.5	3159.02	3310.85	3363.41
M865T41	864.622	41.041								34275.5	2598.65	10643.4	6441.04	25933.8	35833.6	55410.9	49629.7	54522.7	28653.1	31715.4	40313.3	42426	40776.6	40775.5
M353T37_2	353.266	37.167								70296.1	80515.7	59476.6	55925.2	55826.1	75965.5	75531	101154	138832	64565.9	56851.2	46878.5	78069.3	86327	78362.5
M653T34_2	653.438	33.73								86381.3	67657.8	103066	19286.1	17648.2	89347	34365.6	8564.6	27413.2	14375.1	17835.6	31378	7908.94	8955.71	8989.65
M445T261_2	445.158	260.914								6501.44	9371.65	6861.73	12681.1	3135.24	19419.5	170263	540232	65033.9	336889	134326	251589	165201	164085	133766
M297T40	297.131	39.6005								20536.8	23929.1	6756.79	6341.03	40540.1	18679.1	34749.6	53828.3	67394.6	36729.6	39556.1	36511.4	16039.6	18830.2	16271.8
M202T104	202.179	104.488								160303	111109	117383	25999.1	517140	110122	94108.7	291486	165607	299069	161194	653760	215865	213151	215892
M399T37	399.323	36.64								92746.1	121172	118034	20660.4	44224.3	109978	142758	77068.1	84477.5	66137.1	43225	50623.5	73587.6	73638.3	72025.6
M131T109	131	108.939								129861	154908	181997	319900	184985	187244	52735.5	252536	47051.9	309092	200802	312656	244981	225457	216125
M242T240	242.142	239.615								43849.6	23832.4	3277.57	1399.3	20833.4	18052.7	35969.2	163509	42645.9	70430.5	6976.96	106767	34129.5	33535.2	33534.4
M250T36_1	250.184	35.7855								13556.8	6514	31341.3	24934.3	18720.9	25069	22685.8	15614.3	24233.6	12978.4	11021	7311.59	8624.97	6773.87	6341.44
M1012T442	1012.09	441.934								83847.5	68546.7	76847.5	8959.33	59183.2	96439.9	43486.6	136490	74305.1	118795	48251.6	150275	116279	117603	115567
M255T36	255.194	35.652								27678.4	121095	13110.2	14659	45149.6	61929.2	69858.5	98909	138031	38547.6	41504	39424	20199	20703.3	25202.8
M565T348	565.46	348.101								52297.4	58965.7	78895.7	92449.6	58562.8	115312	44813.2	187454	97678.3	180707	70950	172477	173079	173424	173597
M302T228	302.195	227.805								62149.6	44345.4	43966	7901.97	96831.7	48193.4	49090.2	103324	68652.7	52747.8	55402.6	118528	26171.6	26512.1	26066
M206T476	206.054	476.238								393636	376570	261429	48116.8	302704	276812	198989	216888	108127	63795.5	102249	109602	243714	244215	244216
M333T60	333.318	60.0105								162823	126305	175757	85703.1	334002	157868	147911	452108	447769	173039	124272	13715.2	131788	131790	133278
M435T35_2	435.417	35.38								85646.7	159718	26571.3	8213.81	12651.1	125828	70258.7	56390.6	93951.8	9442.44	21780.1	25051.8	7438	6098.02	7458.77
M857T143	856.534	142.548								5630.87	15776.4	15957.4	94386.1	77179.3	37601.9	55406	46620	102782	41837	92856.8	17299.6	38141.2	38147.7	37520.7
M342T183	342.262	183.22								92641.2	51249	51426.9	7525.87	47160.3	62257.1	83098.4	123254	102943	110094	124898	33061.9	103514	100883	98764.1
M110T557	110.07	557.298								442042	428609	392138	80759	266452	416889	154582	689083	501595	589550	163075	361940	433636	433588	429960
M719T339	718.946	338.645								48754.8	63369.1	72152.8	125.88	43161	92721.3	58468.7	228769	105927	211928	94428.7	86889.2	134922	112056	110877
M405T35_2	405.37	35.425								109113	192209	54984	7341.11	26710.3	134284	123528	97790.2	140504	37866.3	43096.7	13325.7	12942.9	14411.2	14542.5
M726T135_2	725.547	134.953								586009	557361	490282	140680	224948	258965	120254	74606.6	130800	143751	314545	63181.4	72950.8	93888.5	93418.8
M237T56	237.146	56.134								56405.8	113157	24324	9804.46	59981	94852.8	134795	168757	436211	66325.4	112575	24324.2	38680.9	36421.4	36438.6
M676T347	676.485	347.476								22783.8	23134.7	41834.2	21.2681	17299.1	50597	23454.4	173929	62029.6	149758	31086.7	230555	152123	154931	154957
M118T329	118.085	329.18								182603	145496	142935	740432	170643	160507	174167	39275.7	161035	75318.7	146657	32741.2	72525.7	65446.8	72603.6
M221T389	221.018	389.118								187559	171895	199963	52506.5	174720	195389	217201	290084	167302	145163	175436	266475	264829	264983	253201
M647T35_2	646.607	35.38								89784.9	76908.4	97411.5	6474.73	4542.48	8033.43	4902.34	2845.4	8366.31	6538.2	9514.22	16406.6	3066.9	3077	3256.15
M737T314	736.907	313.835								82946.3	63771.2	91057.9	117.232	53363.5	102805	69757.6	199294	119746	232830	70597.8	274059	198271	198269	197321
M569T314	568.78	313.683								188543	177150	182955	433.756	141910	212704	190449	335787	278130	356531	184914	330614	321135	321134	321447
M306T38	306.241	37.598								28199	10482.7	10731.2	8980.2	23883.5	5392.27	66924.4	75054.9	31338.5	29803.6	13190.5	31048.5	34654.4	31834.3	32312.8
M175T37_2	175.147	36.767								63986.5	72502.3	68958.8	33311.9	55292	90256.2	88162.8	48488.8	63197.6	32451.9	39719.3	24803.3	63714.6	61220.1	61121
M258T489	258.06	489.29								45921.7	34158.4	33471.4	5453.34	25537.4	37616.1	29457.8	77447.4	46634.1	77599.5	32393	103376	75917.7	73231.8	75907.4
M463T35_2	463.446	34.761								62150.4	91088.8	37351.1	41502.7	4398.32	73645.8	44213.7	22047.2	22345.7	97070.5	5685.15	4432.61	106054	108098	108103
M629T339	628.957	339.214								48180.7	66173.5	77155.6	12894.5	60658.1	126370	59862.3	151614	165337	146924	95411.8	655425	164306	206169	158997
M751T340_1	750.894	340.224								433843	482365	490657	5289.47	533589	518245	524288	513850	494639	468134	502978	273842	516131	516452	497421
M279T103	279.23	102.596								1.23114e+06	12405.7	15412.8	1.15352e+06	40654.5	1.23154e+06	1.20166e+06	1.28682e+06	1.20512e+06	6646.8	1.27505e+06	1.24455e+06	1.22989e+06	1.22145e+06	1.2299e+06
M731T60	730.534	60.3895								331254	352689	176414	2847.62	2032.33	433510	4192.97	89085	5433.78	72069.7	1508.17	496235	53604.8	53663.7	51026.2
M409T36	409.368	36.451								63921.9	138036	37836.2	19591.7	35531.6	105888	155212	138000	151835	70073.3	73115.1	42768.2	76834.6	84155.2	76864.8
M151T36_2	151.147	36.107								26609.5	57251.5	26440.1	7737.17	35905.2	54943.3	54220	67501.6	59976.9	96792.8	16645.9	20960.9	15058.7	15896.1	15313
M405T446	405.196	445.635								55775.8	51364.9	60939.9	9666.73	46231.8	51209	62034.8	109860	78901.4	108347	62463	132504	90657.8	89852.4	89849.5
M216T302	216.053	302.187								136968	155106	175995	52379.1	140468	183333	143457	170115	144286	195407	132681	186300	193457	188561	193547
M522T36_3	522.433	36.107								52811	56907.7	55270.4	12119.6	37310.1	69614	56093.3	111330	56446.6	84495.8	40741.2	82750.3	87124.2	88939.8	87124.7
M296T663	296.045	663.328								302862	176013	375755	255428	461909	793914	245263	405252	1.02488e+06	1.91797e+06	501505	491390	364475	372411	307977
M711T182	711.067	182.442								98999.4	22066.7	227334	106627	233462	218793	175636	209142	163072	181167	204778	275345	290616	253075	238128
M187T244	187.095	243.809								6131.92	1786.49	3458.59	7138.01	4334.39	23651.7	14027.8	241982	104933	204018	32337.8	314707	146723	146698	144712
M335T36_3	335.292	36.343								71931.7	85503.3	36863.7	11916.4	41843.3	86136.9	70313.9	65711	116139	57578.2	23862.5	40688.6	66321.6	66285.7	69339.3
M261T261	261.055	261.409								41262.7	44348.9	44636.7	2508.52	37586.5	59154	28740.4	46199.3	45554.5	71876.1	24659.4	235773	77048.6	77033.2	83802.6
M431T39	431.204	39.29								35823.5	17271.3	19188.8	10164.4	74501.4	23006.7	53650.9	49375.2	120274	40616.9	68687.9	23947.3	20980.8	21925	20942.1
M669T340	668.891	339.92								325294	378955	244323	10206.4	401644	230491	370910	389437	377349	399020	251524	200048	324427	343473	324289
M211T37_1	211.132	37.293								46437.7	62629.7	17372.1	1997.67	66895.8	51720.6	85423	114587	216692	61268.7	46875.5	62332.1	43321.1	42086	41975.8
M408T258_2	408.121	258.362								131923	127949	143857	2323.36	88585.8	148378	80122	214372	135282	198000	85285.5	246402	225881	226888	226888
M801T149	800.575	148.785								177614	185109	240166	58240	63496	256396	145226	38750.2	25555.3	134427	59727.1	31435.3	67202.8	80513.5	60552.2
M261T37_3	261.22	37.365								5878.93	7640.55	17462.1	1364.45	13848	13683.2	26056.1	10625.9	13852.6	12824	15588	13217.6	14037	14111.1	16950.3
M646T442	646.035	442.413								232792	243177	238626	122189	233986	237441	209425	239140	239553	240943	198916	253383	239217	235844	239388
M90T351	90.0539	351.492								200878	168026	216414	406979	194133	170819	171051	93739.4	177009	117256	173019	96884.4	127190	127187	125428
M267T39_2	267.159	38.631								41875.1	54914.8	11821.8	18487.2	76397	51162.2	67314.7	103369	156779	119816	64785.2	71849.5	61803.3	61386	48927.1
M181T36	181.158	36.2145								63866.8	47597	64068.4	18908.8	31410.7	83783.7	70307	61875.2	52604.3	23818.7	32504.2	22207.6	35690	37397.7	37967.5
M413T129	412.776	128.805								75617.4	91349.3	92394.9	107672	80285.7	101816	79860.6	28285.7	42688.7	38766.1	105350	37544.5	23126.4	23114.6	24796.9
M219T38	219.137	38.1835								7769.19	12437.7	31977.3	71385.6	25799.5	9870.5	23895.7	17387.9	35213.6	4368.9	15263.7	8036.34	64943.1	62383.6	64968.5
M1195T342	1194.99	341.997								38737.5	63337.2	67672.9	98.1711	48296.3	100555	67442.5	402636	122570	259995	104767	307806	200690	209024	200768
M270T35	270.278	35.461								38873.6	51690.8	63589.6	31038.2	30808.6	74510.1	82804.8	87882.6	47122.6	98966.8	27729.6	35002	86408.9	86531.6	95274.3
M739T338	738.914	338.277								222357	299874	290557	246.438	266480	365219	285576	409196	363894	234206	362591	568504	392953	392970	377566
M640T34_1	639.57	33.55								131169	140701	129239	15983.4	21121.6	20966.1	12894.3	16782.5	41010.5	19462.7	32896.4	53492.8	12215.3	11645.2	12172
M193T314_1	192.905	314.41								286121	264584	287826	1240.19	240132	313345	294027	427028	356558	435725	292843	385792	406960	406960	407499
M280T351_1	279.974	350.813								310345	279686	296699	37817.8	277755	336783	230986	255402	292001	267358	229170	214646	272496	277918	272502
M1043T341	1042.96	341.449								43419.7	94804.2	99600.8	133.291	63938.3	143693	70593.4	301507	171855	313734	143848	603208	326664	328330	328336
M366T288	366.001	288.077								2144.04	11724.4	14757.6	2705.84	19484.9	50720.5	17512.5	275995	74515.6	218284	43973.6	108566	176677	170604	170694
M319T275	319.153	275.152								166662	132557	161243	9956.32	213042	273734	106766	131399	304156	121630	95963.5	66587.1	244848	228044	229180
M555T337	554.939	337.139								93145.5	101825	106380	356.577	81285.4	104707	94609.3	394288	155424	333389	98545.7	239879	307749	302303	307764
M400T38_2	400.304	37.598								47393.8	66282	9385.44	22256.8	68638.4	70742.7	40732.8	83824.8	84403.2	72642.7	27280	54766.6	54981.2	58916.5	59066.3
M400T41	400.342	40.779								37229.2	72456.5	93653.1	44880.6	58540.5	27776.8	129561	28160.5	177450	59368.8	78597.2	134722	57392.9	85383.4	85472.3
M367T337	366.973	337.389								112851	92441.9	102983	1519.42	87628.1	124518	106397	451823	130367	401053	113043	154474	326782	326739	321045
M272T119	272.293	119.432								346887	411239	391434	74485	28893.7	317682	280775	467456	90446.7	377183	71023.8	49316.9	389235	388189	273361
M419T37_2	419.349	36.513								126341	165148	98325.1	22460.6	62363.1	128377	128162	136787	150814	72841.9	53683.5	39086.2	64867.8	69818.4	65210.3
M416T356	416.097	355.733								1389.89	901.805	2926.33	15.1666	632.503	12582.8	294.402	96748.6	15835.5	101061	1379.42	167872	102397	100859	102409
M451T36	451.411	35.8425								94213.2	111452	55376.5	5903.36	14342	91522.7	74084.7	53163.7	74344.1	28789.9	33556.1	46324.3	11845.8	12456	12454.6
M504T350_2	504.05	349.647								12161.4	21248.7	26295.1	20.7378	21512.2	47130.6	24114.1	110123	34410	126514	30934.6	192734	85452.3	84972.3	85453.5
M292T387	292.102	386.543								45625.5	60042.9	50680.4	10610.7	55479	66676.4	61296.4	156012	104404	142124	56914.5	193509	112117	107231	112233
M438T191	438.296	191.468								143291	136686	138470	21941.8	21047.1	149461	121043	103504	56247.4	61826	45465.8	18239.5	76498.6	77715.4	76540.3
M646T339	645.932	339.168								318439	463020	454261	1938.72	381165	402557	369907	623831	421815	619671	279542	307990	457268	432517	457692
M151T98	151.057	97.846								73599.9	68923.5	23792.7	10963	98618.4	135374	23389.3	340787	135410	461227	214949	406924	340887	330800	330558
M127T481	127.038	480.805								44349.1	58982.9	73210.1	10767.6	57909.5	79318.2	30211.2	54844.6	35247.9	62426.4	15611.3	150057	91251.1	91372.9	90177.9
M692T149	691.506	148.873								52774.8	61617.6	47142	10145.7	5023.04	21779.2	9946.05	9324.39	40102.7	6903.1	11631.3	11929.3	10418.1	13274.3	12029.7
M259T240_1	259.169	239.635								41783	20842.9	7991.32	4344.78	19976.8	18199	31056.2	150715	56560.8	73115.4	11015.4	93219.3	32344.2	32428.1	30023.6
M788T347_1	787.508	346.941								4164.31	3623.99	10012.7	48.7333	4282.16	17474.2	2509.23	120567	18727.4	87620.4	5008.07	193774	73571.7	60804.1	73631.7
M889T503_1	889.12	502.594								61791.2	50121	73542.6	5929.35	51403.6	39313.9	42446.1	73697.7	64161	76233.4	36212.6	87022.2	96559.5	96518.7	98041.3
M715T182	715.06	181.7								415696	368339	592598	221239	183221	445292	53332.6	301237	486760	543394	409282	747112	459089	457877	412689
M954T347	954.044	347.024								13472	23348.1	20484.2	124.504	14723.2	26967.8	13031	88443.3	30764.5	94140.2	18312.3	167328	83053.4	81367	81374.3
M472T427_2	472.238	426.599								64386.5	57457.4	59573.9	2547.04	44332.3	73444.3	59893.6	150197	91544.5	152040	66997.1	166344	125142	124401	125140
M397T308	397.111	307.543								143336	120272	127392	2224.96	120673	118748	88181.1	71810.3	66689.3	85061.6	85849.3	87965.2	102628	102202	102628
M606T348	606.462	348.101								42966.7	54783.1	59811.4	79344.1	47365.9	92830.2	37731.1	168284	92838.4	157940	61505.9	181566	154641	154589	149019
M797T342_2	797.457	341.997								67653.6	107672	112319	131.948	84769.2	152794	94237.1	237481	175584	230448	168410	245647	219255	232941	219687
M445T421	445.158	421.062								170795	79547.3	191030	68041.2	61652.4	118047	766912	441606	437834	963484	250580	543098	546119	483220	499938
M474T35_1	474.314	34.772								45593	34522.8	33025	10641.2	36745.2	44188.2	52011.4	76892.8	19682	53521.2	28667.5	19700.9	57897.7	61558.6	57981.3
M159T288	158.995	288.126								667053	446474	430802	436411	364117	494905	443649	289445	220798	288881	300087	293795	229090	224138	224149
M588T339	587.955	338.894								36236.8	59622.7	61710.1	1965	36606.6	98596.9	46902.6	329236	64869.2	117595	75939.7	449994	118060	104266	105702
M120T362	120.002	361.776								67422.3	27529.2	38409.7	2881.57	42153.6	105317	32934.1	239413	111125	240868	71437.9	238489	137618	137507	156151
M267T50_1	267.194	50.3105								60496.4	141254	37843.1	5416.7	74872.9	56724.5	63014.1	142838	149888	19450.1	73968.7	31459.2	32860.4	26982.4	26329.3
M667T313	666.758	313.329								111400	107404	123331	385.367	91735.7	147511	115426	299057	195790	300594	114769	293181	255626	255309	255627
M661T338	660.961	337.927								227695	300631	302135	2733.02	294313	365770	294470	554692	377672	518052	350957	564990	498116	498132	495764
M377T341	376.94	341.141								594711	637570	629683	62645.6	241097	371619	736213	750164	405919	540918	643618	326655	593974	528646	594623
M246T355	246.031	355.44								22545.9	20604.4	29709.4	240.28	16895.3	39652.5	18003.4	120305	35514.2	114712	22350.4	201218	104206	103211	103220
M169T379	169.057	378.652								301063	309890	276431	61735.6	262183	246127	111862	163306	95781.1	86466.5	101260	277870	241910	243850	243918
M456T166	456.401	165.642								27772.2	43084.7	170309	22481.6	2273.9	55585.2	78381.1	14439.2	5208.11	9508.42	20629.7	485.397	10095.2	9557.47	10110.7
M230T224	230.091	224.192								97959.1	84312.1	121915	20458	216757	179606	70104.9	45400.2	96534.9	36539.3	54041.1	58182.2	22028.9	22020.7	16947.2
M647T348	647.464	347.687								35449.2	35175.3	56992.4	14304.9	36477.3	78443.8	32605.5	168042	73356.5	152134	51495.8	178015	150983	148698	151026
M224T310	223.971	310.092								46343	43733.3	50226.7	18286.1	41689.4	58077.8	95745.9	190944	124689	183553	94636.2	218636	128043	128040	129194
M387T259	387.174	259.249								92923.3	96775.6	154524	713.875	96886.1	173309	57075.3	154111	76769	264140	76297.9	254563	211205	207752	207740
M633T340	633.452	339.839								143871	202707	198472	703.678	186387	273832	191510	491658	290307	430039	268066	10578.3	404710	385869	385824
M674T342	674.452	341.557								131541	179572	188593	156.781	147669	266095	184269	261755	292835	403443	261317	513907	309865	298516	297342
M203T227	203.047	226.764								6692.8	8897.45	14057.6	1657.52	8376.43	12879.5	21459.5	74980.2	25630.7	38511.2	24211.5	56657.2	14389.5	13630.7	14432.6
M288T36	288.177	36.17								9323.88	29222.1	13145.1	737.247	19674	24469.3	19336.7	81644.9	54639.3	16730.9	13151	35362.4	20613.9	20727.2	19253.2
M227T37	227.127	37.1305								35813.1	51579.1	13835.1	10632	68995.7	48587	70756	86887.9	131432	54791.7	79699.4	37581.3	28150.2	26818.7	26902.2
M831T145	830.519	144.956								20695.6	15878.9	18549.2	108715	33587.9	31720.4	36739.9	40634.5	44469.6	39152.7	96635.8	33421.9	24107.8	24111.9	25104.8
M395T40_2	395.314	40.298								262269	119592	89457.6	15730.6	117345	104928	95645.6	105189	169680	14240.8	106444	155831	40499.5	122054	122589
M639T315_2	638.929	314.995								78454.4	59876.8	87798.5	131.159	59893	106735	69420.1	181495	116334	219364	71094.3	250279	178676	178667	180274
M805T136_2	805.064	135.924								20886.4	23808.4	28601	69377.4	17782.5	21809.2	28260.2	21888.2	28813.6	25631.8	22717.1	29138.7	13512.3	14075.2	14092.9
M353T302	353.115	302.296								81160.2	84248.1	65662.1	13614.8	64031.7	77671.9	54562.4	71182.2	74199.1	71740.5	81875.8	86694.2	96837.4	98347.3	96830.5
M676T157	676.451	156.703								114851	30888.3	43367.2	15378.4	98577.8	98712.2	191714	196346	137734	80528.9	86257.2	44108.3	184279	187240	184277
M849T40	848.628	40.471								17590.5	21595.9	15155.7	7603.39	35409.1	13378.6	36774.4	42324.8	41099.7	25533.5	35649.3	49629.2	34226.6	31583.3	34232.8
M614T34	613.553	33.5825								118340	126610	99027	14394.2	16131.7	22200.7	18526.7	7767.9	24589.1	13958.5	29804.6	50994.3	9855.77	6689.3	9543.25
M297T34_1	297.24	34.203								53700.9	86168	16954.2	5329.4	48290.7	70679.5	78743	147505	189877	80746.9	52345.7	65004.2	52425	51329.3	51305.6
M573T258_2	573.199	258.425								61013.9	51299	64961.8	125.221	31677.6	78186.9	25317.3	141038	54182.1	133032	32839.6	208562	169033	166704	169108
M215T293	214.953	293.497								397637	368875	349186	561505	111116	212374	117521	244126	147250	184726	173228	235084	131744	125643	125881
M445T480	445.158	479.532								32680.8	43491.9	86885.5	55325.4	26466.7	222451	419284	557335	440432	222949	313183	428900	443883	426250	559647
M290T169	290.085	169.048								4279.62	4675.71	19022.9	845.64	25015.3	30132.5	1889.31	22660.7	4605.03	135989	4771.05	201313	55431.9	51624.6	55385.2
M294T257	294.063	257.163								93876.7	94432.8	109002	5331.06	97652	102530	105001	162499	133185	131310	112576	198537	121663	119359	119251
M335T35	335.22	34.761								49097	44196	38603.6	6494	54445.1	43207	91020.3	80259.8	117545	40675.7	43314.4	27255.2	58889.3	61684.8	58791.3
M212T398	212.052	398.493								25482.4	24014.6	28361	5657.4	28276.8	31437.4	27010.1	69919.7	42608.9	75303.8	38041.6	89988.2	52229	51287.2	51287.5
M234T37_2	234.184	36.785								46088.2	1187.96	29239	5409.92	18332.7	19634.4	35079.3	38472.5	26175.9	62840.5	18048.5	75472.2	44272.4	44787.5	44267.1
M244T309	243.917	309.395								112072	99964.8	109069	4068.86	101765	120266	111535	149088	122286	140662	115144	174695	140570	139981	139981
M362T389	362.083	389.114								168005	150038	144957	36250.7	162454	158746	178176	238707	188558	101379	149332	165943	206108	199036	198996
M100T235_2	100.021	235.239								71281	63669.7	66469.1	11666.7	48220	14401.2	124303	240251	57636.9	221275	33383.6	280112	165657	173544	173474
M230T41	230.21	40.738								9697.62	3795.84	14474.5	12240.6	35569.4	15283	17687.3	82208.8	25015.2	22314.7	30831.8	14808.8	22435.9	22669.3	22676.3
M139T37	139.111	37.354								38174.8	59183.4	20053.1	17727.3	81172.3	46969.1	86069.1	144312	164648	56187.7	56872.8	66609.4	58117.8	58086.7	58731.7
M395T36	395.353	36.401								68149.7	105296	53608.5	11595.3	52537.7	91418.3	89343.6	121649	145746	52595.9	50162.4	31445.4	59843	59836	61689.7
M237T36	237.184	36.09								62600.7	69625.7	32913.8	11900.7	70702.6	84773	91119.7	138389	199865	68494.8	55053.2	69027	61157.4	55542.8	61130.3
M237T37_2	237.147	37.39								13400.4	28749	30667.1	3367.19	27396.4	20414	44829.2	75489.1	108110	31408.9	6726.22	36894.8	23085.2	23153.8	29524
M237T37_3	237.221	36.919								15165.7	202171	61972	6591.28	36499.2	10759.8	17776.8	44330.9	62265.9	112076	32768.9	111573	29713.4	56582.7	57829.3
M271T38_1	271.19	37.808								42542.9	58636.3	23703.3	7841.39	54056.7	51756.8	95138.8	105694	163665	47127	37884.7	46705.6	13944.5	14357.8	14356.9
M500T310	499.889	310.015								28438.2	27538.2	29432.2	395.844	26604.8	42181.7	32101.1	128808	64204.7	112085	39933.2	175420	92747.1	92769.9	91922.9
M431T36_2	431.35	35.731								10548.3	15272.5	6486.83	2028.35	4566.2	21836.7	13383.2	16234.9	26439.4	8240.6	9415.73	3061.26	8098.05	12551.1	8376.02
M647T32	647.455	32.475								56143.9	65345.1	68152.7	160947	78824.2	30430.4	45523.3	32063.5	61700.7	51955.4	71900.2	46778.1	40325.7	48682.9	39941.1
M498T341_2	498.467	341.009								160435	244582	237392	62.0963	188228	333894	229350	617638	371803	280903	326097	699293	466686	433975	466510
M225T306	224.991	306.479								105504	98263.8	108527	16143.1	75132.5	119885	90048.8	102854	93329.3	136901	75678.4	139819	130559	129328	130548
M762T180_1	761.515	180.362								55896.2	49248	42795.9	94763.5	20654.4	33993.1	52363.3	17967.7	19836.1	15303.1	22759.2	15976.7	7083.6	6290.85	7001.79
M349T306	349.031	306.317								24851.9	29301.8	37376.4	1205.15	33925.2	44997.3	22697.4	81774.7	43331.6	61422.7	32918.6	105011	61531.7	61558.5	59261.1
M447T35_3	447.416	35.2175								31667.6	52332.5	13291.1	12286.3	2026.8	39497.6	32638.3	21064.4	27602.9	3296.14	2961.97	20089.9	5780.76	7775.57	5449.89
M328T282	328.036	281.535								368457	379412	483864	193731	387636	372469	530958	72124.9	275160	91664.1	317824	92534.2	133290	126805	126898
M464T290	463.977	289.916								1693.02	3499.58	5269.09	1167.44	7281.76	27348.5	7373.14	313040	55644.7	244629	27933.9	467296	168438	161967	162039
M908T343_2	908.481	342.959								32211.4	65400.4	72022.3	74.8343	41424.7	107800	57669.6	274193	119886	250426	102347	300057	241432	248765	248529
M677T143	676.523	142.963								123845	129614	204129	61243.7	49986.6	126689	86653.2	33970.5	53462.1	28806.7	61954.7	10608.8	36567.4	36610.4	40995.8
M616T341	615.91	340.575								474936	590649	565346	2326.06	676429	487607	536176	457847	460376	408685	311733	345465	419661	355102	419954
M344T82	344.227	81.67								347404	272882	263794	33029	197150	345342	345529	524734	326165	417554	158952	331485	385598	367266	386001
M961T342	961.464	341.768								35211.9	65366.3	66993.1	92.5331	49885.8	98715.3	44254.7	312334	110552	167464	104991	352983	192350	180425	180464
M391T338	390.935	337.989								80419.5	75998.5	88858.2	1552.37	64061.9	104779	70002.7	261817	104912	218027	64458.3	159686	224217	224447	225404
M932T341	931.94	341.132								121996	194456	204838	496.396	156383	258825	183272	554295	315968	316446	273804	652478	377005	420520	420083
M726T154	725.552	153.883								99492.9	101907	124311	4930.43	15993.7	145247	32437.6	16841.6	57564.9	49791.3	30702.1	303006	31485.2	35616.7	35661.3
M341T356	340.88	355.987								245741	281885	252555	355841	302023	242174	307562	183393	242005	180099	300947	121057	173360	173371	171064
M572T257	572.135	256.931								87163.5	73642.4	100049	94.2339	79608.2	102567	50129.7	147787	103691	135332	60696.3	172158	149525	149574	147151
M307T259	307.143	258.963								5714.67	5196.39	7183.24	105.639	3741.33	5686.34	4146	5994.79	4849.61	4400.79	4425.43	6088.65	15054.3	14816.1	22384.5
M575T337	574.909	336.765								287451	370731	324574	1162.08	316712	378380	311728	345437	370330	324322	393373	147462	345691	345677	335115
M546T445	546.2	444.9								71356.8	86382.5	72132.5	13385.8	72786.2	72179.8	80412.2	110247	84830.2	115043	78321.2	139391	103753	102666	102675
M569T437	569.185	436.815								48441.5	44831.4	57505.3	6371.31	37734.9	53190.1	43632.1	54553.9	43561.9	78562.8	49942	47844	67783.9	65765.9	70750.8
M399T580	399.143	580.321								623464	521299	483862	103330	727131	862160	648244	622796	1.19418e+06	658104	179059	407371	618447	551380	557916
M433T36	433.365	36.073								44023.4	127062	43988.3	5877.81	33437.2	94134.4	116095	82380.4	132416	24454.3	25425.4	9051.2	14564.4	15000.9	14504.4
M838T342_2	838.459	341.76								58986	96641.2	108507	314.388	83351.1	152381	96827.4	405482	177521	246138	162800	257997	253218	245746	245371
M435T40	435.345	40.035								40780	68531.3	4677.02	6102.47	36694	131372	123763	53490.7	209224	64651.8	124598	55565.2	81844.8	62138.9	81577.9
M429T41_2	429.293	41.073								12581.9	10367.7	4716.98	11205.4	9048.82	25561.8	12834.8	14865.5	52294.4	5750.53	13666.5	27915.8	28812.2	22283.4	23031.5
M302T37	302.196	36.931								10343.8	13629.7	794.435	1368.48	14516.3	13823.6	14896.7	20285.2	33100.7	9770.03	11308.9	5952.77	15916.5	10992.5	14877.8
M590T40	590.374	40.4985								38095.9	7021.01	11494.3	1772.24	5431.6	8283.05	7298.34	9840.77	10861.9	19045.4	15416.4	25762.9	37003.3	39702.1	36364.1
M239T37_2	239.127	36.874								13021.2	8947.84	1621.3	1900.92	14297.2	12472.2	17952.4	28825.5	33061.5	8995.63	6246.89	14204.6	8903.85	14061.9	10548.8
M149T37_1	149.095	36.781								12151.7	28751.5	13966.9	2477.09	16511.6	20085.1	31295.5	27651.5	42258.4	57094.2	60929	8361.2	37733.8	41069.9	37526.9
M698T341	697.913	340.894								297189	376578	368762	1026.91	324222	374194	372253	223874	235171	340086	358119	372517	384131	384121	364355
M780T340	779.916	340.224								202927	286057	285657	551.187	253242	342895	248726	354388	355576	392404	301872	252260	393342	391595	393010
M356T79	356.26	78.5195								622936	399831	398541	81205.9	26164	248207	148327	271495	80890	160003	56019.2	51283.8	212574	219286	219030
M252T41	252.105	40.676								4843.55	6005.7	5212.58	19080.5	38324.3	10171.6	13163	48181.8	16089.6	39804.9	14186.3	78675.8	72102	96709.3	60213.3
M215T39	215.126	39.363								26715.4	33235.2	15433.6	10843.5	82744.5	30457.1	65103.3	72776.2	135261	24697.3	52405.1	22170.1	11893.2	8998.8	11994.1
M489T34	489.25	33.601								2812.99	3654.22	3848.63	27882.8	2317.03	3463.91	25325	5011.18	5625.7	4221.02	3678.24	3093.28	9727.43	14297.1	9438.55
M395T293	394.931	293.302								5771.41	8488.23	8004.6	3925.94	4424.14	89788	6458.23	6198.86	142262	4433.77	6342.67	3268.5	6304.59	5884.01	5844.33
M142T358	141.984	357.542								126502	124646	147061	11020.1	110263	177919	103827	262504	166590	273206	121741	355171	264890	264909	263176
M469T454	469.103	453.553								15084.3	12777.3	22998.8	2336.8	25877.2	26232.6	37684.5	86263.7	72395.5	92222.9	41116.2	121564	62334.7	60795.7	61270.6
M470T276	470.183	275.798								196988	263625	303480	3443.57	187061	307438	151852	48747	265309	154100	215000	31159.2	243959	230079	244136
M885T137	884.564	136.95								31788.9	41027.9	46225.4	74377.8	31122.3	37471.4	29865.5	33629.8	36613.4	52530.9	25817	18887.1	29050.6	30619.5	28994.7
M243T272	243.182	271.889								90691.2	128462	133135	12097.7	104645	132186	103547	119834	134694	151104	116134	2757.82	157549	162039	157426
M576T146	575.5	146.291								75908.3	93396.3	64755.6	28177.7	17024.2	27418.3	21000.2	14663.7	21699.3	16980	42327	24886.8	7707.23	7372	8166.87
M940T442_2	940.144	441.967								32572.8	36585.9	26404.4	1893.69	18688	32464.2	16686.3	65489	35621.3	76033.9	19597	101031	74909.4	74883.4	72415.3
M309T63	309.155	63.4745								75305.3	49437.1	133013	54786.3	568004	152984	8232.26	126818	35239	163744	47070.2	132539	97875.3	97876.4	94615.8
M295T310_1	294.928	309.727								336723	478280	344212	72212.5	323324	334100	353507	383839	353364	387777	351766	227986	337715	323244	338217
M500T264	500.204	264.226								115924	104378	121942	176.936	55221.8	145380	55865.1	218333	100442	192949	52438.5	168934	219995	212974	220111
M889T502	888.786	502.499								57632	46487.3	65985.2	4801.35	45981.8	35016.6	36243	59473.6	56740.8	75123.8	34202.9	77157.3	86617.5	85734.9	86622.3
M288T89	288.198	89.036								347376	407812	360364	107605	311309	176541	513068	164022	541883	319220	218741	29433.7	174944	189343	171266
M715T139	714.537	138.934								186409	220763	234899	106249	92540.5	313929	158277	117010	90737.1	58812.8	102363	138172	78739.5	79067.6	73892.5
M129T35	129.126	34.772								29249.7	20939.6	30835.7	14571.1	23529.5	33091.4	24198.4	44178.8	31557.7	59091.5	26175.3	35428.9	46858.7	45553.4	46880.7
M592T341_2	592.45	340.575								254067	402280	293899	1065.9	315045	315275	319878	573403	307785	520409	354956	292927	389958	351787	388942
M1125T342_2	1124.97	341.995								23265.5	52611.9	53090.7	102.948	43682.1	99106.3	42913.9	256930	115215	203163	112684	237053	190912	184432	191005
M490T36_1	490.168	36.107								9530.44	10673.5	27430.9	77712.5	30450.7	12726.6	26734.7	9295.96	35246.8	5735.75	17876.6	8847.75	35866.6	37841.6	35850.8
M599T251	599.317	250.518								83688.2	74241.6	83345.9	9967.09	19087.9	72953.8	60573.3	98800.7	52188.9	88637.4	30820	25641.3	86911.6	92933.1	86922
M521T162	521.094	161.701								124864	197420	187576	225720	211784	205869	131091	196971	157475	194478	102731	180638	227983	222532	228011
M703T139	702.54	139.335								307596	285459	315061	81906.6	82395	217775	185012	92422.5	198265	244494	103715	70103.8	77033.9	93687.7	93540.2
M628T34	627.531	33.552								92041.7	115898	115848	14386	13194.2	35309.8	22766.7	16539	23157.6	10251.5	28871.5	34512.9	5694.88	7390.57	7376.38
M339T280	339.098	280.233								6744.64	8833.56	4509.76	490.554	4432.25	7938.61	4450.6	167205	13639.2	126229	7678.69	73481.2	71138.9	69554.8	70174.9
M419T29	419.232	29.372								71058.1	57205.5	46670	6821.71	33080.5	64534.8	52437.6	97812.1	71607.1	88999.3	20673.2	38071.2	82731.2	82729.3	81818.1
M715T342	715.455	341.993								95417.6	146731	148785	126.505	120885	220759	136680	440376	242502	372476	212322	480367	245717	292076	245328
M346T315	345.924	314.952								167356	144711	174729	3652.44	125475	187941	148129	247072	208520	275060	149759	251208	243644	243007	243008
M759T203	758.566	202.603								24351.7	28333.2	37561.9	7557.83	73084.7	22752.2	23198	22003.6	73428	28926.7	120320	37818.4	10537.7	19568.4	23842.4
M421T39	421.365	38.5275								85470.9	110480	48766.8	6317.55	40030.5	51157.6	99858.5	81531.8	129009	12892	46138.8	20483.6	8815.57	6701.46	10256.6
M262T262	262.051	262								34085.8	25701.8	40113.5	1135.1	12901.3	44914.6	13401.7	53404.6	25516.4	55205	27970.7	212740	59992.5	63160.2	63134.6
M262T258	262.021	257.972								624.543	894.903	872.743	955.335	1105.02	971.634	805.872	2699.52	505.832	629.734	825.229	12545.5	1024.98	1274.24	2097.1
M370T36	370.295	36.107								26349.1	7319.89	4143.95	2058.16	14966.1	7557.16	9808.29	11803.7	26168.6	6996.84	5076.89	9568.15	11508.3	15278.2	11482.5
M700T148	700.485	147.806								103442	105040	123682	61117.1	43037.3	112936	72731.5	32365.4	44271.2	17349.4	39445.1	25041.6	14515.1	14642.6	17119.3
M736T59	735.568	59.411								385370	616716	338824	638.838	1129.87	323158	1755.8	51300.4	2016.01	70897.1	463.962	384420	40787.1	39433	39436.1
M183T115	183.101	114.822								59178.6	201644	43824.2	6748.45	83697.4	160191	42424.2	248295	169768	92304.4	51333.5	67451.8	65469.9	65164.4	76015.4
M756T342_2	756.455	341.997								99981.5	163440	176777	209.661	144416	241531	151334	503962	265609	340999	223964	325164	364146	363653	348013
M720T343_1	720.012	342.629								36696.5	48379.9	49398.1	40.9642	45047.4	92556.6	55232.8	295361	124074	275659	93166.7	366862	243481	237474	243545
M391T70	391.282	70.389								121579	72742.6	76949.9	67113.1	503737	152433	142332	301506	403034	301650	501369	238000	298323	322242	298705
M647T340	646.909	339.553								387159	368762	390160	14355.4	443813	314564	289007	200325	298858	392051	405076	342612	379927	379477	354027
M291T36	291.123	36.343								22477.6	25327.3	16043.5	9061.44	30821.3	20276.1	18776.1	33185.7	30090.9	27012.3	22199.8	56140.5	35014.2	30031.9	30061.1
M373T146	373.247	145.797								3472.04	14845.1	20623.6	38168.1	8352.81	10911.5	13090.7	1106.45	21155.7	72814	12295.1	3643.07	4089.44	4844.44	4286.82
M147T396	147.075	396.119								368677	351688	314356	96546	286686	265987	108042	129023	82067.7	96670.1	39113.3	210154	208532	192933	208403
M324T37	324.289	37.437								39794.5	39461.5	32979.7	12689.8	13363.6	50021.2	57422.2	68743.8	54313.4	66410.5	18446.1	28813.7	56119	57309.8	56117.6
M373T504_1	372.604	503.918								16745.2	12875.5	22424	4599.05	13722.7	21143.2	28758.8	66478.7	38807.3	70146.4	25558.9	90612.7	52831.3	54715.6	54716.9
M129T379	129.065	379.204								295662	321186	276991	76789.6	246513	297694	232515	359776	244010	328753	198866	370443	266864	275143	275281
M473T341	472.994	340.507								256972	343100	328767	5301.96	298250	396893	280900	671766	403246	629373	414746	724416	564224	566452	564240
M647T34	646.571	33.5465								95434.1	85578.9	97276.5	13210	7935.75	24156	7126.33	5909.51	20575	7045.84	12342.9	24747.3	5221.38	5719.75	5687.77
M278T38_2	278.246	37.5995								43168	31103.8	27420.9	22451.6	52787	35754.5	69922.2	83118.3	55442.1	80991	14488.8	57187.9	76576.3	76625.4	70120.5
M551T340_2	551.449	339.847								164247	222739	235338	1258.59	169579	286561	201389	204720	285595	391204	265317	478314	381083	381892	381892
M357T37	357.308	37.002								36787.5	55266.8	43813.9	24880	44803.4	80964.1	50198.5	132083	64937	69485.2	30928	27597	70025.7	65340.9	70356.5
M357T36	357.351	36.073								73077	67862.8	65155.7	9240.27	12818.6	141008	76402.4	40376.2	34678.5	14281.1	29817.1	51804.5	82880.2	83028.5	33958.4
M602T201	601.516	200.503								154881	149359	95185.1	6514.64	7861.53	22357.6	9061.05	5350.98	13662	5994.32	15986	8360.06	3435.46	3560.79	3557.04
M208T115	208.168	115.382								395957	260564	249435	20353.5	179490	226766	115497	440889	148717	350623	133921	251915	294190	281469	294081
M414T42	414.321	42.0725								54929.2	56456.9	46605	69425.2	28102.1	56781.5	150443	134836	97127.1	60632.7	93071.4	66243.2	52579.9	52411.7	45583.8
M679T178	678.555	177.888								182308	159585	172262	24309	15662.2	84185.7	52775.5	9457.2	27357.8	7289.72	31356.8	9914.39	2867.66	3713.55	2798.12
M149T34_1	148.56	33.903								84091.8	72170.6	77753	18468.2	34941.7	88874.7	70758.3	89281.6	42193.6	63371.7	32078.6	41470.6	74828.9	71449.9	74806.7
M403T357_1	402.88	356.51								212556	232326	205544	336562	235310	193943	246425	131531	183143	128019	241640	93500.2	134913	141373	134841
M499T184	499.055	184.286								151705	167517	126888	134137	314461	306363	58343.3	192408	190363	498297	273491	263812	420488	404502	344024
M144T581	144.101	580.585								110497	313267	235052	77574.1	73560.7	396953	285579	309263	245116	531754	232882	549390	351589	326595	325945
M243T336	242.961	336.115								88073.5	106913	90335.1	6190.76	65566.5	112747	85187.4	238198	94730.3	296124	73889.5	155670	233144	221711	233352
M136T162_1	135.639	161.983								138448	162405	183293	66436.1	164943	226907	112639	207347	150648	327376	114177	394968	245305	244173	245160
M322T36	322.317	35.513								44647.3	41785.1	74045.8	11486.5	13463.3	35581.8	27976.7	22637	11342.1	13340.9	19401.5	12224.3	18981.6	18433.3	17035.7
M457T35_1	457.283	34.966								25664.6	14626.5	14958.4	105643	43298.9	31001.5	57752.5	42562.5	73157.3	28718.3	20558.9	20905.7	26207.2	28579.9	25707.8
M281T302	281.047	301.577								62242.4	71433.4	87002.8	9978.25	64160.3	91555	74425.5	101422	79811.5	121285	66694.5	129015	115431	112543	112694
M783T501	783.225	501.122								16923.3	12580.7	25604.6	1359.95	9562.38	16731	30541.8	69098.8	32206.9	72747.1	26860.2	75839.7	55823.2	55827.5	54104.6
M372T176_1	372.076	176.286								45829.6	228973	96864.6	120101	343960	134934	210602	203712	196100	407749	278641	443439	283134	305238	304992
M1072T343_2	1071.99	342.656								17465.8	36640.4	43921.1	49.5221	31683.1	69436.2	31028.8	223753	88166.4	190997	74136.8	273062	166067	184307	184006
M798T51	797.528	50.8905								114323	117523	113762	114988	65831.6	79630.5	39825.9	45480.9	55008.3	93765.6	95183.6	26429.9	24569.4	24532.1	29912.6
M369T351_2	369.071	350.513								58434.8	67955.8	106651	149.925	69256.8	134340	59433	131519	95844.5	186064	78315.5	175147	151335	150404	150412
M364T30	364.34	30.32								44992.2	41023.6	38999.5	10394.2	16991.9	40953.8	27616	84558.5	83285.9	92535.3	29957	45117.7	62321.7	61053.2	69237.3
M364T39_2	364.287	38.735								13486.6	5679.81	16989.4	3426.86	9961.67	9610.52	10411.4	31966	19005.7	6719.22	8426.88	7134.04	10488.3	11709.4	15412
M195T62	195.121	62.115								252528	247644	277778	35857.1	234308	291135	234288	427253	336039	283978	158598	201677	280083	266565	265742
M381T36	381.335	36.107								61499.1	101635	51381.6	5880.04	73868.7	98484.9	97879.7	164764	192610	81404.4	74695.5	53044.1	59760.3	59836.4	55675
M663T146	662.508	145.62								117092	127369	141091	44531.1	52340.5	131697	90400.2	37591	32046.4	26181.4	47254.4	21252.6	23390.8	24313	23393.2
M903T340_1	902.921	340.098								173177	328769	306488	82.9647	240639	364264	270999	385387	371091	297133	371100	360682	296237	275266	296194
M319T35_1	319.19	35.437								38583.9	41562.3	31490.1	7338.22	29650.5	43148.6	59494.1	69609.4	60511.3	77217	71817.8	24582	67639.7	66163.1	67640.9
M437T36_3	437.398	36.143								61427.1	115350	36410.2	13477.4	12436.3	84630.2	76440.8	56044.7	62844.9	33181.8	31553.4	4230.66	11913.5	11210.3	11217.8
M467T451_2	467.223	451.456								33825.3	40747.4	53736	7307.66	35382.4	36960	67545.1	94185.3	75423.5	105966	62250.1	137346	77420.5	76972.7	77423
M405T38	405.333	38.262								24853.4	65279.7	12536.4	3840.12	26532.5	39882.2	60244.4	47792.7	90100.3	14581.6	26707.8	9736.53	7755.2	6102.84	5646.1
M695T339	694.985	338.974								86400.8	115413	128618	18.4228	99858.6	182392	102934	201028	186279	156064	160108	244727	273026	304919	306801
M467T35	467.277	34.853								55411	50926.2	44957.9	10738.7	17541.3	58798.9	61219.5	74152.7	87379.8	110574	80288.4	25424	85653.3	84112.1	85645.6
M484T36_3	484.435	35.683								49870.7	39818.9	43490.4	5818.03	30831.8	70420.8	95972	37618.5	87158.8	37615.4	73994.7	34114.9	38252.8	71285.1	71166.3
M216T452	216.013	451.69								116493	82299.7	53839	9967.32	49605.4	44711.4	65883.4	127501	111413	56981	72774.1	78815.7	109974	108786	109770
M303T36_2	303.304	36.002								54892.9	53345.7	45513.9	12221.6	15046.5	60464.8	35354.2	97744.2	25430.4	79113.4	30171.2	20681.6	93824.3	93779.2	88989.5
M583T347_2	583.001	346.938								10641.5	14361.4	18075.9	10.9075	11350	26924.1	10493.8	82481.8	25370.7	85495.6	13967.1	146503	75252.9	71888.4	75229.2
M382T42_1	382.242	41.563								28440.4	34055.6	4060.1	2794.03	48169.5	36281.7	63595.9	52377.3	109948	18029.4	36567.6	7576.37	4168.64	3842.83	3757.17
M77T258	77.038	257.846								130654	124581	119768	8433.78	106140	153240	52349.6	243205	166308	223632	114421	273932	226279	221955	221997
M1014T341_1	1013.94	340.575								86117.9	124153	133615	111.069	107342	199939	102701	317746	213940	277819	191524	520069	290386	292802	301411
[truncated: 7,239 more rows]

## Sheet: neg
ID	m/z	rt(s)	Name	adduct	HMDB	KEGG	SuperClass	Class	SubClass	shCon-1	shCon-2	shCon-3	shCon-4	shCon-5	shCon-6	shSelO-1	shSelO-2	shSelO-3	shSelO-4	shSelO-5	shSelO-6	QC-2	QC-3	QC-1
M261T472	261.071	471.75	.alpha.-L-Glu-L-Asp	[M-H]-	HMDB0028815		Organic acids and derivatives	Peptidomimetics	Hybrid peptides	139778	60342.6	109124	104114	204387	126192	244619	261212	319255	291754	233778	271259	121473	118451	121454
M421T452	421.062	451.94	.alpha.,.alpha.'-trehalose 6-phosphate	[M-H]-	HMDB0001124	C00689	Organic oxygen compounds	Organooxygen compounds	Carbohydrates and carbohydrate conjugates	36815.4	21307.7	10425.3	13428.2	44919.3	6058.13	29859.2	63207.7	79226.6	16340.2	61633.2	27796.5	18789.3	19004	18790.3
M161T478	161.045	478.251	.beta.-d-glucose	[M-H-H2O]-	HMDB0000516	C00221	Organic oxygen compounds	Organooxygen compounds	Carbohydrates and carbohydrate conjugates	14213.6	18858.7	8326.28	6735.01	29066.1	22564.9	24784.5	44228.6	57631.6	14786.1	31760.5	17890.2	9368.6	9532.66	9361.41
[truncated: 9,537 more rows]
