# Supplementary material for: Hydrolyzing NAD to NMN and AMP by SelO is Required for Mitochondria Homeostasis
Source: Research Square preprint supplement (doi:10.21203/rs.3.rs-5137152/v1), 2024-10-17
Supplement: Supplementary file 2 [file 605b22bdc099850feeeb80d9.xlsx]

## Sheet: core_table_gene
st_gene_id	gene_id	gene_symbol	fpkm_WT1	fpkm_WT2	fpkm_WT3	fpkm_cKO1	fpkm_cKO2	fpkm_cKO3	tpm_WT1	tpm_WT2	tpm_WT3	tpm_cKO1	tpm_cKO2	tpm_cKO3	read_count_WT1	read_count_WT2	read_count_WT3	read_count_cKO1	read_count_cKO2	read_count_cKO3	average_fpkm_SelOcKO	average_fpkm_WT	average_tpm_SelOcKO	average_tpm_WT	average_read_count_SelOcKO	average_read_count_WT	diffexp_log2fc_WT-vs-SelOcKO	diffexp_deseq2_qvalue_WT-vs-SelOcKO	diffexp_deseq2_pvalue_WT-vs-SelOcKO	gene_symbol	gene_other_symbol	gene_type	gene_tran_num	gene_tran_list	gene_coding_capacity	gene_known_novel	gene_chr	gene_start	gene_end	gene_strand	gene_map_loc	url_ncbi_gene_id	url_hgnc_gene_id	url_ensembl_gene_id	url_genecard_gene_id	url_mirbase_gene_id	gene_kegg_k_id	cellmarker	cog
115490200	115490200	LOC115490200	0.65	0.61	0.44	0.33	0.38	0.33	0.71	0.74	0.58	0.44	0.47	0.41	36.58	39.48	29.47	22.19	24.54	21.58	0.346667	0.566667	0.44	0.676667	22.77	35.1767	-0.653772	0.527144	0.0962425	LOC115490200	NA	mRNA	2	URS00009AEF35+++XM_030255019	coding	known	NC_000071.6	109923453	109945612	+	5 F	115490200	NO_INFO	NO_INFO	115490200	NA	NO_INFO	NA	NA
17184	17184	Matr3	8.53	9.5	8.5	9.02	9.27	10.29	9.29	11.52	11.22	11.77	11.47	12.9	560	724	670	702	701	798	9.52667	8.84333	12.0467	10.6767	733.667	651.333	0.168252	0.749847	0.259482	Matr3	1110061A14Rik+++2810017I02Rik+++AI841759+++AW555618+++D030046F20Rik+++mKIAA0723	mRNA	7	URS00009B3E3C+++URS00009B5562+++URS00009B5D37+++URS00009BB2FB+++URS00009BD60E+++URS0000E8161C+++NM_010771	coding	known	NC_000084.6	35562158	35598573	+	18 B2|18 19.14 cM	17184	NO_INFO	NO_INFO	17184	NA	K13213	Matr3	NA
69710	69710	Arap1	10.51	11.12	11.56	8.92	10.04	8.16	11.45	13.48	15.26	11.64	12.43	10.23	540	672	821	599	650	532	9.04	11.0633	11.4333	13.3967	593.667	677.667	-0.186942	0.753933	0.264169	Arap1	2410002L19Rik+++Centd2+++mKIAA0782	mRNA	17	XR_003946560+++NM_001040111+++NM_001040112+++NM_027180+++NM_198096+++XM_006508186+++XM_006508187+++XM_006508188+++XM_006508190+++XM_006508191+++XM_006508192+++XM_006508193+++XM_006508195+++XM_006508196+++XM_011241897+++XM_030242973+++XM_030242974	coding	known	NC_000073.6	101347921	101412586	+	7|7 E2	69710	NO_INFO	NO_INFO	69710	NA	K18439	Arap1	NA
229644	229644	Trim45	0.07	0.25	0.17	0.09	0.14	0.08	0.08	0.3	0.23	0.11	0.18	0.09	5	17	12	6	9	6	0.103333	0.163333	0.126667	0.203333	7	11.3333	-0.655983	0.815606	0.338382	Trim45	4921530N01Rik	mRNA	8	NM_001165952+++NM_001165953+++NM_194343+++XM_011240100+++XM_030252587+++rna-NM_001165952.1-2+++rna-NM_001165953.1-2+++rna-NM_194343.2-2	coding	known	NT_187022.1	767764	100936925	+	3|3 F2.2	229644	NO_INFO	NO_INFO	229644	NA	NO_INFO	NA	NA
16154	16154	Il10ra	1.01	1.74	1.09	1.1	0.95	0.94	1.1	2.11	1.44	1.44	1.17	1.18	51	102	66	66	55	56	0.996667	1.28	1.26333	1.55	59	73	-0.296237	0.793609	0.313998	Il10ra	AW553859+++CDw210+++CDw210a+++IL-10R1+++IL-10RA+++Il10r+++mIL-10R	mRNA	4	NR_136903+++URS00009ADA39+++NM_001324486+++NM_008348	coding	known	NC_000075.6	45253837	45269149	+	9 A5.2|9 24.84 cM	16154	NO_INFO	NO_INFO	16154	NA	K05134	NA	NA
106947	106947	Slc39a3	2.36	2.71	2.99	2.58	2.81	2.14	2.57	3.28	3.94	3.37	3.48	2.69	128	170	192	164	174	136	2.51	2.68667	3.18	3.26333	158	163.333	-0.0436762	0.959634	0.832992	Slc39a3	AI845814+++ZIP-3+++Zip3	mRNA	6	NM_001358898+++NM_134135+++XM_006513027+++XM_011243260+++XM_030244801+++XM_030244802	coding	known	NC_000076.6	81028540	81037338	-	10|10 C1	106947	NO_INFO	NO_INFO	106947	NA	K14709	NA	NA
53416	53416	Stk39	0.76	1.13	0.48	0.35	0.72	0.7	0.83	1.37	0.63	0.45	0.89	0.87	32	54	27	19	37	37	0.59	0.79	0.736667	0.943333	31	37.6667	-0.27578	0.914363	0.51358	Stk39	AW227544+++AW556857+++DCHT+++RF005+++Rnl5+++SPAK	mRNA	12	URS00009B4956+++URS00009C1DCB+++URS00009C46DA+++XR_001783147+++XR_003953672+++NM_016866+++XM_011239693+++XM_017319128+++XM_017319129+++XM_017319130+++XM_030251876+++XM_030251878	coding	known	NC_000068.7	68210445	68472108	-	2|2 C1.3	53416	NO_INFO	NO_INFO	53416	NA	NO_INFO	Stk39	NA
19299	19299	Abcd3	45.06	44.19	69.18	111.02	108.11	94.35	49.07	53.55	91.33	144.88	133.81	118.32	2257	2581	4186	6627	6266	5611	104.493	52.81	132.337	64.65	6168	3008	1.04422	1.95131e-05	1.1012e-07	Abcd3	AI313901+++AU018866+++AW146054+++PMP68+++PMP70+++Pxmp1	mRNA	6	URS00009AE40B+++URS00009B0400+++URS00009B0A38+++URS00009B5AE0+++NM_001355756+++NM_008991	coding	known	NC_000069.6	121755044	121815302	-	3 G1|3 52.94 cM	19299	NO_INFO	NO_INFO	19299	NA	K05677	NA	NA
56517	56517	Slc22a21	0.31	0.1	0.2	0.18	0.21	0.16	0.34	0.12	0.26	0.24	0.25	0.21	15.9	5	11.12	11.13	9.02	12.42	0.183333	0.203333	0.233333	0.24	10.8567	10.6733	-0.0119409	0.999812	0.985437	Slc22a21	Octn3+++Slc22a9	mRNA	12	URS00009AE651+++NM_001362202+++NM_019723+++XM_006533804+++XM_006533805+++XM_006533808+++XM_006533809+++XM_006533810+++XM_011249155+++XM_011249156+++XM_030246191+++XM_030246192	coding	known	NC_000077.6	53949954	53980333	-	11|11 B1.3	56517	NO_INFO	NO_INFO	56517	NA	K08202	NA	NA
100043272	100043272	Inafm2	3.6	3.4	3.71	3.78	3.03	3.89	3.92	4.12	4.89	4.93	3.75	4.87	157	172	194	195	152	200	3.56667	3.57	4.51667	4.31	182.333	174.333	0.0542442	0.952797	0.789381	Inafm2	5430417L22Rik	mRNA	3	URS00009B0AA4+++URS00009B3690+++NM_001301269	coding	known	NC_000068.7	118745758	118748810	+	2|2 E5	100043272	NO_INFO	NO_INFO	100043272	NA	NO_INFO	NA	NA
20972	20972	Syngr1	0.36	0.39	0.01	0.01	0.31	0.19	0.39	0.47	0.02	0.02	0.38	0.24	6	4	1	1	4	2	0.17	0.253333	0.213333	0.293333	2.33333	3.66667	-0.714931	0.929127	0.54601	Syngr1	R75468+++Syngr1b+++p29	mRNA	4	NM_009303+++NM_207708+++XM_006520695+++XM_030248440	coding	known	NC_000081.6	80091334	80119501	+	15|15 E1	20972	NO_INFO	NO_INFO	20972	NA	NO_INFO	Syngr1	NA
381823	381823	Apold1	0.21	0.22	0.16	0.13	0.11	0.16	0.23	0.27	0.21	0.16	0.14	0.2	10	12	9	7	6	9	0.133333	0.196667	0.166667	0.236667	7.33333	10.3333	-0.507521	0.873634	0.437398	Apold1	Gm1075	mRNA	2	URS00009BC382+++NM_001109914	coding	known	NC_000072.6	134982001	134986836	+	6|6 G1	381823	NO_INFO	NO_INFO	381823	NA	NO_INFO	NA	NA
78912	78912	Sp2	1.75	2.23	2.25	2.45	2.32	2.13	1.91	2.7	2.97	3.2	2.88	2.67	76	112	117	126	116	109	2.3	2.07667	2.91667	2.52667	117	101.667	0.208533	0.824476	0.347386	Sp2	4930480I16Rik+++mKIAA0048	mRNA	10	URS00009B4955+++URS00009BAA42+++URS00009BF477+++NM_001080964+++NM_001363225+++NM_001363226+++NM_030220+++XM_006534518+++XM_006534519+++XM_006534520	coding	known	NC_000077.6	96953332	96982959	+	11|11 D	78912	NO_INFO	NO_INFO	78912	NA	NO_INFO	NA	NA
17381	17381	Mmp12	0	0.51	0.04	0.21	0.18	0.04	0	0.61	0.05	0.28	0.23	0.04	0	15	1	6	5	1	0.143333	0.183333	0.183333	0.22	4	5.33333	-0.326104	0.952797	0.798334	Mmp12	AV378681+++MME+++Mmel	mRNA	4	NM_001320076+++NM_001320077+++NM_008605+++XM_017313160	coding	known	NC_000075.6	7344397	7360461	+	9 A1|9 2.46 cM	17381	NO_INFO	NO_INFO	17381	NA	NO_INFO	Mmp12	NA
66072	66072	Sdhaf2	7.97	8.28	7.07	6.33	5.73	6.01	8.68	10.03	9.34	8.26	7.09	7.53	353	425	376	332	292	314	6.02333	7.77333	7.62667	9.35	312.667	384.667	-0.310937	0.43229	0.0616844	Sdhaf2	0610038F07Rik+++AA407634+++AW049997	mRNA	2	URS00009BBB23+++NM_025333	coding	known	NC_000085.6	10500512	10525209	-	19|19 A	66072	NO_INFO	NO_INFO	66072	NA	NO_INFO	NA	NA
94192	94192	C1galt1	2.3	3.02	3.66	3.2	2.99	2.98	2.51	3.66	4.83	4.18	3.7	3.73	65	99	124	107	97	99	3.05667	2.99333	3.87	3.66667	101	96	0.0863919	0.952797	0.724504	C1galt1	2210410E06Rik+++AV284120+++T-synthase	mRNA	3	URS00009B0638+++URS00009C419E+++NM_052993	coding	known	NC_000072.6	7845224	7874028	+	6|6 A1	94192	NO_INFO	NO_INFO	94192	NA	K00731	C1galt1	NA
208665	208665	Akr1d1	32.36	32.71	59.75	36.5	53.99	57.97	35.24	39.64	78.88	47.63	66.83	72.69	1173	1255	1946	1202	2034	2011	49.4867	41.6067	62.3833	51.2533	1749	1458	0.272594	0.758806	0.267317	Akr1d1	NA	mRNA	8	NM_145364+++XM_006505825+++XM_006505826+++XM_006505827+++XM_006505828+++XM_011241269+++XM_017321478+++XM_017321479	coding	known	NC_000072.6	37529978	37574921	+	6|6 B1	208665	NO_INFO	NO_INFO	208665	NA	K00251	NA	NA
17918	17918	Myo5a	0.03	0.05	0.04	0.05	0.03	0.07	0.03	0.06	0.06	0.07	0.04	0.09	5	11	10	12	7	16	0.05	0.04	0.0666667	0.05	11.6667	8.66667	0.445895	0.899887	0.486977	Myo5a	9630007J19Rik+++AI413174+++AI661011+++Dbv+++MVa+++Myo5+++MyoVA+++Sev-1+++d+++d-120J+++flail+++flr	mRNA	13	URS00009B56F6+++URS00009B9890+++URS00009BD3E0+++URS00009C3604+++URS00009C5E48+++NM_010864+++XM_006510827+++XM_006510828+++XM_006510829+++XM_006510830+++XM_006510831+++XM_006510832+++XM_030244103	coding	known	NC_000075.6	75069799	75223688	+	9 D|9 42.26 cM	17918	NO_INFO	NO_INFO	17918	NA	K10357	NA	NA
103554	103554	Psme4	6.92	9.33	11.5	13.94	11.91	11.09	7.53	11.31	15.18	18.19	14.74	13.9	636	1023	1319	1578	1311	1252	12.3133	9.25	15.61	11.34	1380.33	992.667	0.496197	0.173413	0.0113613	Psme4	AA409398+++AU041366+++TEMO+++mKIAA0077	mRNA	8	URS00009AEC30+++URS00009B10DE+++URS00009B236F+++URS00009C5962+++NM_134013+++XM_011243649+++XM_017314207+++XM_030245449	coding	known	NC_000077.6	30771775	30881150	+	11|11 A4	103554	NO_INFO	NO_INFO	103554	NA	K06699	NA	NA
105439	105439	Slain1	0.2	0.15	0.16	0.21	0.15	0.08	0.21	0.18	0.22	0.27	0.19	0.1	8	7	8	10	7	4	0.146667	0.17	0.186667	0.203333	7	7.66667	-0.155598	0.95894	0.83045	Slain1	9630044O09Rik+++AA675320+++AW742596	mRNA	2	NM_001361639+++NM_198014	coding	known	NC_000080.6	103650228	103704907	+	14|14 E2.3	105439	NO_INFO	NO_INFO	105439	NA	NO_INFO	NA	NA
224650	224650	Anks1	2.28	3.27	3.32	3.12	2.79	2.8	2.49	3.96	4.38	4.07	3.45	3.51	182	289	336	289	254	240	2.90333	2.95667	3.67667	3.61	261	269	-0.0287229	0.97698	0.883647	Anks1	Anks1a+++mKIAA0229	mRNA	19	URS000077CAEA+++URS0000DB7F6D+++NM_001286040+++NM_001286041+++NM_181413+++XM_006524087+++XM_006524088+++XM_006524089+++XM_006524090+++XM_006524091+++XM_030249682+++XM_030249683+++XM_030249684+++XM_030249685+++XM_030249686+++XM_030249687+++rna-NM_001286040.1-2+++rna-NM_001286041.1-2+++rna-NM_181413.4-2	coding	known	NT_187005.1	599238	28062779	+	17|17 A3.3	224650	NO_INFO	NO_INFO	224650	NA	NO_INFO	Anks1	NA
329421	329421	Myo3b	0	0.02	0	0	0	0	0	0.03	0	0	0	0	0	1	0	0	0	0	0	0.00666667	0	0.01	0	0.333333	-0.973727	0.952797	0.811392	Myo3b	A430065P19Rik	mRNA	17	URS00009B2808+++URS00009BAFC2+++URS00009BC1AB+++URS0000EF1B6B+++NM_177376+++XM_006499745+++XM_006499750+++XM_017319037+++XM_017319038+++XM_017319039+++XM_017319040+++XM_017319041+++XM_017319042+++XM_017319043+++XM_017319044+++XM_017319045+++XM_030251801	coding	known	NC_000068.7	70038911	70429195	+	2|2 C2	329421	NO_INFO	NO_INFO	329421	NA	K08834	NA	NA
73314	73314	Lrrc69	0.02	0.03	0.04	0.05	0.03	0.06	0.03	0.04	0.06	0.07	0.04	0.07	2	3	4.98	6	3	6.68	0.0466667	0.03	0.06	0.0433333	5.22667	3.32667	0.742388	0.877305	0.44412	Lrrc69	1700034K16Rik	mRNA	7	URS00009BA1D5+++URS00009BCE13+++URS00009C330A+++NM_028499+++XM_006538295+++XM_030253831+++XM_030253832	coding	known	NC_000070.6	14623622	14808379	+	4|4 A1	73314	NO_INFO	NO_INFO	73314	NA	NO_INFO	NA	NA
68250	68250	Ciao2a	29.35	23.28	23.2	26.67	22.17	21.16	31.97	28.21	30.64	34.8	27.44	26.53	459	422	435	488	396	388	23.3333	25.2767	29.59	30.2733	424	438.667	-0.0789892	0.952797	0.684804	Ciao2a	5730536A07Rik+++Fam96a	mRNA	3	NM_001359210+++NM_026635+++XM_011242805	coding	known	NC_000075.6	66126596	66138968	+	9|9 C	68250	NO_INFO	NO_INFO	68250	NA	NO_INFO	NA	NA
18260	18260	Ocln	2.01	2.03	2.29	3.22	2.51	2.69	2.19	2.45	3.02	4.2	3.11	3.38	99	127	141	193	143	157	2.80667	2.11	3.56333	2.55333	164.333	122.333	0.423383	0.375005	0.0449773	Ocln	AI503564+++Ocl	mRNA	6	NM_001360536+++NM_001360537+++NM_001360538+++NM_001360539+++NM_008756+++XM_006517566	coding	known	NC_000079.6	100496504	100552718	-	13 D1|13 53.23 cM	18260	NO_INFO	NO_INFO	18260	NA	K06088	Ocln	NA
20955	20955	Vamp7	7.17	5.94	5.08	5.2	6.59	6.88	7.81	7.2	6.7	6.78	8.16	8.63	259	249	220	222	274	293	6.22333	6.06333	7.85667	7.23667	263	242.667	0.0911947	0.952797	0.686263	Vamp7	Sybl1+++TI-VAMP+++VAMP-7	mRNA	4	NM_001302138+++NM_001359151+++NM_011515+++XM_011249809	coding	known	NT_165789.2	10737	39191	-	NA	20955	NO_INFO	NO_INFO	20955	NA	K08515	NA	NA
19253	19253	Ptpn18	3.64	4.92	2.1	2.26	2.06	1.44	3.97	5.96	2.77	2.96	2.55	1.81	71	112	49	53	46	33	1.92	3.55333	2.44	4.23333	44	77.3333	-0.826137	0.257889	0.0218786	Ptpn18	FLP1+++HSCF+++PTP-HSCF+++PTP-K1+++Ptpk1	mRNA	9	URS000076AA3B+++URS00007855B4+++URS00009B5CD7+++URS00009BECF6+++URS00009C16FE+++URS00009C3DC9+++NM_011206+++XM_006495800+++XM_017319374	coding	known	NC_000067.6	34459729	34474377	+	1 B|1 13.25 cM	19253	NO_INFO	NO_INFO	19253	NA	NO_INFO	Ptpn18	NA
13070	13070	Cyp11a1	0.08	0.02	0.02	0	0	0	0.09	0.03	0.03	0	0	0	2	1	1	0	0	0	0	0.04	0	0.05	0	1.33333	-2.92741	0.71813	0.228688	Cyp11a1	Cyp11a+++Cypxia1+++D9Ertd411e+++P450scc+++Scc+++cscc	mRNA	5	URS00007839B8+++URS00009AFC77+++URS00009B57B2+++NM_001346787+++NM_019779	coding	known	NC_000075.6	57998024	58027031	+	9 B|9 31.63 cM	13070	NO_INFO	NO_INFO	13070	NA	K00498	NA	NA
18710	18710	Pik3r3	0.2	0.2	0.4	0.21	0.22	0.21	0.22	0.24	0.53	0.28	0.28	0.26	15	17	22	20	19	18	0.213333	0.266667	0.273333	0.33	19	18	0.0760225	0.972521	0.867719	Pik3r3	AA414954+++p55+++p55pik	mRNA	11	URS00009AEC59+++URS00009B25F3+++URS00009B42CA+++NM_001355584+++NM_001355585+++NM_001355586+++NM_181585+++XM_006502859+++XM_006502860+++XM_006502861+++XM_030253316	coding	known	NC_000070.6	116221400	116303548	+	4|4 D1	18710	NO_INFO	NO_INFO	18710	NA	K02649	NA	NA
80879	80879	Slc16a3	0.12	0.29	0.21	0.16	0.11	0	0.13	0.35	0.27	0.2	0.13	0	4	11	9	6	4	0	0.09	0.206667	0.11	0.25	3.33333	8	-1.23841	0.683461	0.196031	Slc16a3	Mct3+++Mct4	mRNA	5	NM_001038653+++NM_001038654+++NM_030696+++XM_011249321+++XM_011249322	coding	known	NC_000077.6	120948484	120959000	+	11|11 E2	80879	NO_INFO	NO_INFO	80879	NA	K08180	Slc16a3	NA
20662	20662	Sos1	1.94	2.37	2.85	2.53	2.55	2.27	2.11	2.87	3.76	3.3	3.15	2.85	261	370	461	405	396	362	2.45	2.38667	3.1	2.91333	387.667	364	0.102747	0.939976	0.571042	Sos1	4430401P03Rik+++9630010N06+++AI449023	mRNA	5	URS00009B6D7C+++URS00009BBBD2+++URS00009BE8FF+++URS00009BEE09+++NM_009231	coding	known	NC_000083.6	80393752	80480453	-	17 E3|17 50.67 cM	20662	NO_INFO	NO_INFO	20662	NA	K03099	NA	NA
66464	66464	Taf12	12.32	13.58	10.32	9.67	9.99	9.58	13.42	16.46	13.62	12.62	12.37	12.01	212	270	213	197	196	194	9.74667	12.0733	12.3333	14.5	195.667	231.667	-0.253401	0.673196	0.186727	Taf12	20kDa+++2810422D08Rik+++AW557038+++Taf2J	mRNA	6	URS00009AE28C+++NM_025579+++XM_006539107+++XM_006539109+++XM_006539110+++XM_017320350	coding	known	NC_000070.6	132274355	132293329	+	4|4 D2.3	66464	NO_INFO	NO_INFO	66464	NA	K03126	Taf12	NA
19170	19170	Psmb1	140.86	131.88	116.1	109.79	119.03	106.01	153.41	159.81	153.27	143.27	147.33	132.94	1726	1868	1701	1582	1661	1519	111.61	129.613	141.18	155.497	1587.33	1765	-0.171892	0.76691	0.276932	Psmb1	AA409053+++C81484+++Lmpc5	mRNA	1	NM_011185	coding	known	NC_000083.6	15475721	15498276	-	17 A2|17 8.95 cM	19170	NO_INFO	NO_INFO	19170	NA	K02732	NA	COG0638///NA
94282	94282	Sfxn5	3.88	4.45	5.64	5.09	4.81	5.13	4.22	5.39	7.45	6.64	5.95	6.44	209	276	365	321	298	322	5.01	4.65667	6.34333	5.68667	313.667	283.333	0.155649	0.861121	0.408754	Sfxn5	C230001H08Rik	mRNA	7	URS00009B22B2+++URS00009B9CDB+++URS00009C07B6+++URS00009C528F+++NM_178639+++XM_006506816+++XM_030255684	coding	known	NC_000072.6	85213049	85333482	-	6 C3|6 37.23 cM	94282	NO_INFO	NO_INFO	94282	NA	NO_INFO	Sfxn5	NA
30054	30054	Rnf17	0	0	0.01	0	0	0.01	0	0	0.02	0	0	0.02	0	0	1	0	0	1	0.00333333	0.00333333	0.00666667	0.00666667	0.333333	0.333333	-0.0119435	0.999812	0.99738	Rnf17	MMIP-2+++Mmip2+++TDRD4	mRNA	8	NM_001033043+++XM_006519108+++XM_006519109+++XM_006519110+++XM_006519112+++XM_030247854+++XM_030247855+++XM_030247856	coding	known	NC_000080.6	56402650	56525032	+	14|14 C3	30054	NO_INFO	NO_INFO	30054	NA	NO_INFO	NA	NA
56226	56226	Espn	0.37	0.44	0.58	0.64	0.49	0.79	0.4	0.54	0.76	0.83	0.6	0.99	13	20	24	30	21	26	0.64	0.463333	0.806667	0.566667	25.6667	19	0.441238	0.786225	0.305519	Espn	je	mRNA	10	NM_019585+++NM_207687+++NM_207688+++NM_207689+++NM_207690+++NM_207691+++XM_006539059+++XM_006539060+++XM_006539061+++XM_006539063	coding	known	NC_000070.6	152120331	152152414	-	4 E2|4 82.9 cM	56226	NO_INFO	NO_INFO	56226	NA	NO_INFO	Espn	NA
97440	97440	B3gnt9	0.31	0.73	0.15	0.15	0.3	0.31	0.34	0.89	0.19	0.2	0.37	0.39	10	28	6	6	12	12	0.253333	0.396667	0.32	0.473333	10	14.6667	-0.529414	0.873014	0.436859	B3gnt9	3-Gn-T9+++B3gnt9-ps+++BGnT-9+++C76565+++C76566+++beta-1+++beta3Gn-T9	mRNA	3	NM_001271915+++NM_178879+++XM_006531541	coding	known	NC_000074.6	105252638	105255250	-	8|8 D3	97440	NO_INFO	NO_INFO	97440	NA	NO_INFO	B3gnt9	NA
20930	20930	Surf1	26.49	30.45	25.64	20.9	20.81	23.29	28.85	36.9	33.85	27.27	25.76	29.21	369	490	429	346	337	378	21.6667	27.5267	27.4133	33.2	353.667	429.333	-0.283444	0.483855	0.0787071	Surf1	0610010F23Rik+++Surf-1	mRNA	13	NR_073420+++URS00009C41A5+++XR_003951791+++XR_003951793+++XR_374066+++NM_001271724+++NM_013677+++XM_006497821+++XM_006497823+++XM_006497824+++XM_006497825+++XM_006497826+++XM_030249117	coding	known	NC_000068.7	26913378	26916610	-	2 A3|2 19.1 cM	20930	NO_INFO	NO_INFO	20930	NA	NO_INFO	NA	COG3346///NA
108112	108112	Eif4ebp3	165.15	160.53	172.8	125.99	326	252.3	179.86	194.53	228.13	164.42	403.51	316.38	2319	2607	2903	2083	5222	4149	234.763	166.16	294.77	200.84	3818	2609.67	0.552963	0.394743	0.0501109	Eif4ebp3	4e-bp3	mRNA	1	NM_201256	coding	known	NC_000084.6	36664060	36666324	+	18|18 B2	108112	NO_INFO	NO_INFO	108112	NA	NO_INFO	NA	NA
52428	52428	Rhpn2	2.36	2.22	4.11	5.02	4.22	3.16	2.57	2.7	5.43	6.55	5.23	3.96	117	128	245	295	241	185	4.13333	2.89667	5.24667	3.56667	240.333	163.333	0.565196	0.358209	0.0410761	Rhpn2	1300002E07Rik+++AA536890+++C85860+++D7Ertd784e	mRNA	3	URS00009B8BEF+++XR_391076+++NM_027897	coding	known	NC_000073.6	35334180	35392287	+	7 B2|7 21.36 cM	52428	NO_INFO	NO_INFO	52428	NA	NO_INFO	NA	NA
26914	26914	Macroh2a1	32.21	32.83	32.15	34.07	30.77	30.02	35.08	39.78	42.44	44.46	38.08	37.64	884	1042	1057	1096	950	965	31.62	32.3967	40.06	39.1	1003.67	994.333	0.00361983	0.999812	0.979017	Macroh2a1	H2AF12M+++H2afy+++mH2a1	mRNA	18	URS00009BB803+++URS00009BFEFB+++URS00009C526B+++URS0000E8D283+++XR_001780784+++XR_001780785+++XR_001780786+++XR_003950455+++XR_003950456+++XR_003950457+++XR_003950458+++XR_382440+++NM_001159513+++NM_001159514+++NM_001159515+++NM_012015+++XM_006517257+++XM_006517258	coding	known	NC_000079.6	55826250	56135626	+	13|13 B1	26914	NO_INFO	NO_INFO	26914	NA	K11251	Macroh2a1	NA
16348	16348	Invs	1.2	1.68	2.25	1.5	1.86	1.67	1.31	2.04	2.97	1.96	2.3	2.09	95	158	219	144	169	162	1.67667	1.71	2.11667	2.10667	158.333	157.333	0.0361371	0.977119	0.885797	Invs	Nphp2+++inv	mRNA	17	URS00009B2A36+++URS00009C5F2D+++NM_001281977+++NM_001281978+++NM_010569+++XM_006537626+++XM_006537629+++XM_006537630+++XM_006537631+++XM_006537632+++XM_006537633+++XM_006537634+++XM_006537635+++XM_006537637+++XM_011249937+++XM_017319994+++XM_030253261	coding	known	NC_000070.6	48279707	48431956	+	4 B1|4 26.11 cM	16348	NO_INFO	NO_INFO	16348	NA	K19626	NA	NA
110960	110960	Tars	40.91	45.7	46.9	42.02	43.07	42.13	44.55	55.38	61.92	54.84	53.31	52.82	1519	1967	2089	1847	1838	1844	42.4067	44.5033	53.6567	53.95	1843	1858.33	-0.0108899	0.992072	0.931056	Tars	D15Wsu59e+++Tars1+++ThrRS	mRNA	1	NM_033074	coding	known	NC_000081.6	11383663	11399658	-	15 A1|15 5.6 cM	110960	NO_INFO	NO_INFO	110960	NA	K01868	NA	COG0441///NA
245828	245828	Trappc1	70.13	47.68	44.27	33.53	50.74	49.03	76.38	57.78	58.45	43.76	62.8	61.49	542	425	408	303	443	440	44.4333	54.0267	56.0167	64.2033	395.333	458.333	-0.252463	0.804891	0.327198	Trappc1	BET5+++D11Ertd172e+++MUM2	mRNA	1	NM_001024206	coding	known	NC_000077.6	69323986	69325793	+	11 B3|11 42.51 cM	245828	NO_INFO	NO_INFO	245828	NA	NO_INFO	Trappc1	NA
70207	70207	Taco1	2.53	6.07	6.71	7.09	4.99	5.76	2.75	7.35	8.86	9.25	6.18	7.22	60	167	191	199	136	161	5.94667	5.10333	7.55	6.32	165.333	139.333	0.289032	0.825277	0.348564	Taco1	2310066I18Rik+++Ccdc44	mRNA	2	XR_003949501+++NM_027346	coding	known	NC_000077.6	106066057	106074035	+	11|11 E1	70207	NO_INFO	NO_INFO	70207	NA	NO_INFO	NA	NA
217219	217219	Fam171a2	0.79	0.76	0.68	0.61	0.69	0.8	0.86	0.92	0.89	0.8	0.85	1.01	35	39	36	32	35	42	0.7	0.743333	0.886667	0.89	36.3333	36.6667	-0.0233803	0.998574	0.945954	Fam171a2	NA	mRNA	3	URS00009B62BC+++NM_199200+++XM_006533049	coding	known	NC_000077.6	102436981	102447677	+	11|11 D	217219	NO_INFO	NO_INFO	217219	NA	NO_INFO	NA	NA
13855	13855	Epn2	1.22	1.4	1.39	1.53	1.41	1.28	1.33	1.7	1.84	1.99	1.75	1.6	80	103	109	117	105	98	1.40667	1.33667	1.78	1.62333	106.667	97.3333	0.130573	0.937356	0.560553	Epn2	9530051D10Rik+++AA536924+++Ibp2	mRNA	33	URS0000769FD2+++URS00009B5130+++URS00009B5DD5+++NM_001252188+++NM_001252189+++NM_001362585+++NM_001362586+++NM_001362587+++NM_010148+++XM_006532165+++XM_006532166+++XM_006532167+++XM_006532168+++XM_006532169+++XM_006532170+++XM_006532171+++XM_011248711+++XM_011248712+++XM_011248713+++XM_030245528+++XM_030245529+++XM_030245530+++XM_030245531+++XM_030245532+++XM_030245533+++XM_030245534+++XM_030245…	coding	known	NC_000077.6	61514363	61579717	+	11|11 B2	13855	NO_INFO	NO_INFO	13855	NA	K12471	Epn2	NA
20556	20556	Slfn2	3.18	4.04	3.45	2.23	2.7	1.74	3.46	4.9	4.55	2.91	3.34	2.18	70	103	91	58	68	45	2.22333	3.55667	2.81	4.30333	57	88	-0.622687	0.269449	0.0234068	Slfn2	Shlf2	mRNA	6	URS00009AEB25+++URS00009C4BAF+++NM_011408+++rna-NM_011408.1-2+++rna-NM_011408.1-3+++rna-NM_011408.1-4	coding	known	NW_019168514.1	122487	83070678	+	11 C|11 50.3 cM	20556	NO_INFO	NO_INFO	20556	NA	NO_INFO	Slfn2	NA
74069	74069	Serpina3a	0.21	0.07	0.48	0.07	0.12	0.06	0.22	0.09	0.64	0.09	0.15	0.07	5	2	14	2	2	1	0.0833333	0.253333	0.103333	0.316667	1.66667	7	-2.06214	0.445218	0.0656969	Serpina3a	NA	mRNA	3	NM_001167705+++NM_028740+++XM_017315216	coding	known	NC_000078.6	104112724	104121897	+	12|12 E	74069	NO_INFO	NO_INFO	74069	NA	NO_INFO	NA	NA
74734	74734	Rhoh	0.16	0.19	0.16	0.18	0.13	0.05	0.18	0.23	0.21	0.24	0.16	0.06	12	16	15	16	11	4	0.12	0.17	0.153333	0.206667	10.3333	14.3333	-0.480428	0.869784	0.431405	Rhoh	5830400A04Rik+++AU019774+++Arhh	mRNA	11	URS00009AF3A9+++URS00009B19AA+++URS00009B259C+++URS00009BAA6A+++URS00009BC2A7+++URS00009BC63F+++NM_001081105+++NM_001363454+++XM_011240779+++XM_030254861+++XM_030254862	coding	known	NC_000071.6	65860742	65896700	+	5|5 C3.1	74734	NO_INFO	NO_INFO	74734	NA	K07873	NA	NA
56189	56189	Prodh2	157.46	161.99	160.34	153.38	169.65	178.01	171.49	196.3	211.68	200.16	209.99	223.22	3008	3371	3416	3318	3610	3820	167.013	159.93	211.123	193.157	3582.67	3265	0.123193	0.855366	0.397039	Prodh2	2510028N04Rik+++2510038B11Rik+++HYPDH+++MmPOX+++MmPOX1+++POX1	mRNA	6	NM_019546+++XM_006540221+++XM_006540222+++XM_006540223+++XM_006540224+++XM_006540225	coding	known	NC_000073.6	30493586	30513402	+	7|7 B1	56189	NO_INFO	NO_INFO	56189	NA	K11394	Prodh2	NA
232811	232811	Kmt5c	5.49	5.35	4.37	5.4	4.74	4.52	5.98	6.49	5.78	7.04	5.87	5.66	189	209	172	209	180	176	4.88667	5.07	6.19	6.08333	188.333	190	-0.0331627	0.973534	0.873173	Kmt5c	BC024816+++Suv4-20h2+++Suv420h2	mRNA	8	NM_001115018+++NM_001358044+++NM_146177+++XM_006539769+++XM_006539770+++XM_006539771+++XM_006539772+++XM_030242414	coding	known	NC_000073.6	4740092	4747514	+	7|7 A1	232811	NO_INFO	NO_INFO	232811	NA	K11429	NA	COG2940///NA
16000	16000	Igf1	98.15	67.19	66.32	73.59	85.23	79.74	106.89	81.43	87.55	96.03	105.49	100	10316	8198	8374	9184	10342	9910	79.52	77.22	100.507	91.9567	9812	8962.67	0.0897888	0.952797	0.666991	Igf1	C730016P09Rik+++Igf-1+++Igf-I	mRNA	24	URS00009B1E5D+++URS00009B62AB+++URS0000DE0BA8+++NM_001111274+++NM_001111275+++NM_001111276+++NM_001314010+++NM_010512+++XM_006513255+++XM_006513257+++XM_006513258+++XM_006513261+++XM_006513262+++XM_006513264+++XM_017313810+++XM_017313811+++XM_017313812+++XM_030244906+++XM_030244907+++XM_030244908+++XM_030244909+++XM_030244910+++XM_030244911+++XM_030244912	coding	known	NC_000076.6	87858265	87937047	+	10 C1|10 43.7 cM	16000	NO_INFO	NO_INFO	16000	NA	K05459	Igf1	NA
100504195	100504195	Micalcl	0.54	0.72	0.35	0.63	0.42	0.71	0.59	0.88	0.46	0.83	0.52	0.89	18	28	14	25	16	28	0.586667	0.536667	0.746667	0.643333	23	20	0.192143	0.952797	0.681647	Micalcl	NA	mRNA	2	NM_027587+++XM_030241932	coding	known	NC_000073.6	112368308	112413104	+	NO_INFO	100504195	NO_INFO	NO_INFO	100504195	NA	NO_INFO	NA	NA
67900	67900	Mtfp1	15.69	22.07	22.17	16.57	18.07	19.95	17.08	26.75	29.27	21.63	22.37	25.02	280	456	474	349	369	418	18.1967	19.9767	23.0067	24.3667	378.667	403.333	-0.0741386	0.952797	0.685642	Mtfp1	1700020C11Rik+++2610507A21Rik+++AV005788+++Mtp18	mRNA	1	NM_026443	coding	known	NC_000077.6	4091481	4095431	-	11|11 A1	67900	NO_INFO	NO_INFO	67900	NA	NO_INFO	Mtfp1	NA
219022	219022	Ttc5	2.31	2.95	2.27	1.37	1.9	2.28	2.51	3.58	2.99	1.79	2.35	2.86	60	87	70	45	55	69	1.85	2.51	2.33333	3.02667	56.3333	72.3333	-0.358267	0.707183	0.219353	Ttc5	NA	mRNA	4	URS00009BD9DB+++NM_001080949+++NM_001360545+++NM_177625	coding	known	NC_000080.6	50765409	50785520	-	14|14 C1	219022	NO_INFO	NO_INFO	219022	NA	NO_INFO	NA	NA
20021	20021	Polr2c	11.49	14.89	11.2	13.94	12.31	14.63	12.51	18.04	14.79	18.2	15.24	18.34	238	357	278	341	292	356	13.6267	12.5267	17.26	15.1133	329.667	291	0.179677	0.801981	0.322392	Polr2c	33kDa+++RPB3+++Rpo2-3+++mRBP31	mRNA	1	NM_009090	coding	known	NC_000074.6	94857450	94864242	+	8|8 C5	20021	NO_INFO	NO_INFO	20021	NA	K03011	NA	COG0202///NA
15926	15926	Idh1	101.39	107	128.31	129.32	132.42	130.13	110.42	129.66	169.39	168.77	163.91	163.18	3178	3886	4822	4794	4765	4803	130.623	112.233	165.287	136.49	4787.33	3962	0.275955	0.397759	0.0513027	Idh1	AI314845+++AI788952+++E030024J03Rik+++Id-1+++Idh-1+++Idpc	mRNA	2	NM_001111320+++NM_010497	coding	known	NC_000067.6	65158616	65186479	-	1 C2- C3|1 32.91 cM	15926	NO_INFO	NO_INFO	15926	NA	K00031	Idh1	COG0538///NA
23967	23967	Osr1	0	0.94	0.03	0.34	0	0.06	0	1.14	0.04	0.44	0	0.08	0	30	1	11	0	2	0.133333	0.323333	0.173333	0.393333	4.33333	10.3333	-1.17622	0.952797	0.634878	Osr1	Odd1+++Osr	mRNA	2	URS00009AE687+++NM_011859	coding	known	NC_000078.6	9574442	9581500	+	12 A1.1|12 4.05 cM	23967	NO_INFO	NO_INFO	23967	NA	NO_INFO	Osr1	NA
231655	231655	Oasl1	3.99	8.14	5.43	4.15	4.79	4.13	4.35	9.86	7.17	5.41	5.93	5.18	105	278	192	147	160	144	4.35667	5.85333	5.50667	7.12667	150.333	191.667	-0.315715	0.726453	0.23697	Oasl1	7530414C13Rik+++oasl9	mRNA	4	NM_001359945+++NM_001359946+++NM_145209+++XM_006530295	coding	known	NC_000071.6	114923143	114937911	+	5|5 F	231655	NO_INFO	NO_INFO	231655	NA	K14608	Oasl1	NA
380702	380702	Shisa6	0.01	0	0	0	0	0	0.01	0	0	0	0	0	1	0	0	0	0	0	0	0.00333333	0	0.00333333	0	0.333333	-0.973727	0.952797	0.811392	Shisa6	Gm879+++ckamp52	mRNA	7	URS00009B6F96+++URS00009B9439+++NM_001034874+++XM_006533619+++XM_030246098+++XM_030246099+++XM_030246100	coding	known	NC_000077.6	66211725	66535606	+	11|11 B3	380702	NO_INFO	NO_INFO	380702	NA	NO_INFO	Shisa6	NA
105242433	105242433	Gm38702	0.04	0.03	0.05	0.03	0	0	0.04	0.03	0.07	0.03	0	0	1.31	1.05	2.1	1	0	0	0.01	0.04	0.01	0.0466667	0.333333	1.48667	-1.88986	0.848144	0.387536	Gm38702	NA	mRNA	1	XM_011243934	coding	known	NC_000078.6	19824129	19882473	-	12 A1.2|12	105242433	NO_INFO	NO_INFO	105242433	NA	NO_INFO	NA	NA
72140	72140	Cep89	1.69	2.02	3.08	1.86	2.17	1.95	1.84	2.44	4.06	2.43	2.69	2.44	89	111	134	107	110	107	1.99333	2.26333	2.52	2.78	108	111.333	-0.0414653	0.966676	0.852552	Cep89	2610507L03Rik+++Ccdc123	mRNA	5	NR_153799+++XR_003946568+++XR_391104+++NM_028120+++XM_030243008	coding	known	NC_000073.6	35396999	35439830	+	7|7 B2	72140	NO_INFO	NO_INFO	72140	NA	NO_INFO	NA	NA
107242	107242	AI837181	17.4	19.49	16.75	16.26	14.9	14.85	18.95	23.62	22.11	21.22	18.45	18.62	348	451	401	384	341	349	15.3367	17.88	19.43	21.56	358	400	-0.166559	0.776429	0.290541	AI837181	Bles03+++N28173	mRNA	2	NM_001256515+++NM_134149	coding	known	NC_000085.6	5425144	5427317	+	19|19 A	107242	NO_INFO	NO_INFO	107242	NA	NO_INFO	NA	NA
23853	23853	Def6	0.19	0.63	0.16	0.29	0.19	0.08	0.21	0.76	0.21	0.38	0.24	0.1	6	23	6	11	7	3	0.186667	0.326667	0.24	0.393333	7	11.6667	-0.711548	0.831848	0.357736	Def6	2410003F05Rik+++6430538D02Rik+++AV094905+++Ibp+++Slat+++Slat2+++Slat6	mRNA	5	URS00009B9AE7+++URS0000DB910A+++NM_027185+++XM_030249766+++rna-NM_027185.3-2	coding	known	NT_187005.1	897803	28228608	+	17|17 A3.3	23853	NO_INFO	NO_INFO	23853	NA	NO_INFO	Def6	NA
666504	666504	Tmem249	0	0.07	0	0	0	0	0	0.09	0	0	0	0	0	1	0	0	0	0	0	0.0233333	0	0.03	0	0.333333	-0.973727	0.952797	0.811392	Tmem249	EG666504+++Gm8140	mRNA	1	XM_030248877	coding	known	NC_000081.6	76533208	76535299	-	15|15 D3	666504	NO_INFO	NO_INFO	666504	NA	NO_INFO	NA	NA
238690	238690	Zfp458	2.67	1.2	0.74	0.93	1.54	1.22	2.91	1.45	0.98	1.21	1.9	1.53	269	141	90	112	179	146	1.23	1.53667	1.54667	1.78	145.667	166.667	-0.284359	0.898266	0.483469	Zfp458	BC062958+++Gm33446+++Rslcan-7+++Znf728+++mszf59-2	mRNA	12	NR_155551+++URS00009AF692+++URS00009BF06A+++URS00009C2313+++URS0000BCBF54+++NM_001001152+++XM_017315510+++XM_030247256+++XM_030247257+++XM_030247258+++XM_030247259+++XM_030247260	coding	known	NC_000079.6	67225137	67278498	-	13 B3|13 34.54 cM	238690	NO_INFO	NO_INFO	238690	NA	K09228	NA	NA
64435	64435	Fcamr	0.09	0.12	0.1	0.11	0.04	0.13	0.1	0.15	0.13	0.14	0.05	0.17	8	12	9	9	4	8	0.0933333	0.103333	0.12	0.126667	7	9.66667	-0.471695	0.902231	0.490506	Fcamr	NA	mRNA	11	URS000076623E+++URS00009BA521+++URS00009BE559+++NM_001170632+++NM_144960+++XM_006529787+++XM_017321921+++XM_017321922+++XM_017321923+++XM_017321924+++XM_017321925	coding	known	NC_000067.6	130784536	130825903	+	1|1 E4	64435	NO_INFO	NO_INFO	64435	NA	NO_INFO	NA	NA
74302	74302	Mtmr3	3.36	5.17	5.46	5.05	4.91	4.41	3.66	6.26	7.21	6.59	6.07	5.52	268	484	565	507	463	446	4.79	4.66333	6.06	5.71	472	439	0.129507	0.919116	0.522306	Mtmr3	1700092A20Rik+++AI255150+++AW557713+++FYVE-DSP1+++ZFYVE10+++mKIAA0371	mRNA	10	URS00009B6161+++URS00009BD6C5+++URS00009BFE89+++XR_003949519+++NM_028860+++XM_006514845+++XM_006514846+++XM_006514847+++XM_006514848+++XM_017314807	coding	known	NC_000077.6	4480867	4594863	-	11|11 A1	74302	NO_INFO	NO_INFO	74302	NA	K18082	NA	NA
14063	14063	F2rl1	0	0.13	0.06	0	0.09	0.04	0	0.16	0.08	0	0.11	0.05	0	6	3	0	4	2	0.0433333	0.0633333	0.0533333	0.08	2	3	-0.479085	0.952797	0.746042	F2rl1	Gpcr11+++PAR-2+++Par2	mRNA	1	NM_007974	coding	known	NC_000079.6	95511718	95525240	-	13 D1|13 49.53 cM	14063	NO_INFO	NO_INFO	14063	NA	K04234	NA	NA
434179	434179	Zfp975	1.7	1.24	1.08	0.72	0.99	1.23	1.85	1.51	1.43	0.94	1.23	1.55	75.64	64.62	58.59	38.51	51.37	65.62	0.98	1.34	1.24	1.59667	51.8333	66.2833	-0.384677	0.74275	0.252775	Zfp975	EG434179+++Gm5595+++mszf88	mRNA	4	URS00009B495F+++URS00009B634D+++NM_001008427+++XM_030242738	coding	known	NC_000073.6	42660105	42692810	-	7 B3|7	434179	NO_INFO	NO_INFO	434179	NA	K09228	NA	NA
13197	13197	Gadd45a	1.65	1.99	1.98	1.34	0.75	1.07	1.79	2.42	2.62	1.75	0.93	1.34	25	35	36	24	13	19	1.05333	1.87333	1.34	2.27667	18.6667	32	-0.778936	0.430083	0.0604608	Gadd45a	AA545191+++Ddit1+++GADD45	mRNA	2	URS00009AFA84+++NM_007836	coding	known	NC_000072.6	67035096	67038001	+	6|6 C1	13197	NO_INFO	NO_INFO	13197	NA	K04402	Gadd45a	NA
20502	20502	Slc16a2	15.86	21.89	27.31	26.51	29.47	24.06	17.27	26.53	36.06	34.6	36.48	30.17	964	1544	1993	1911	2063	1728	26.68	21.6867	33.75	26.62	1900.67	1500.33	0.365754	0.428458	0.0601313	Slc16a2	AW105741+++Mct8+++Xpct	mRNA	7	URS00009B160B+++URS00009B1791+++URS00009B26EC+++URS00009C1710+++NM_009197+++XM_030251272+++rna-NM_009197.2-2	coding	known	NT_111920.1	19891	103821988	+	X D|X 46.29 cM	20502	NO_INFO	NO_INFO	20502	NA	K08231	NA	NA
226999	226999	Slc9a2	0.02	0	0	0.02	0	0	0.02	0	0	0.02	0	0	1	0	0	1	0	0	0.00666667	0.00666667	0.00666667	0.00666667	0.333333	0.333333	-0.0119428	0.999812	0.997274	Slc9a2	2210416H12Rik+++4932415O19Rik+++AV333884+++NHE2	mRNA	2	URS0000811AD6+++NM_001033289	coding	known	NC_000067.6	40681712	40768885	+	1 B|1 19.66 cM	226999	NO_INFO	NO_INFO	226999	NA	NO_INFO	NA	NA
66841	66841	Etfdh	91.01	82.17	93.67	99.82	101.98	97.39	99.11	99.57	123.67	130.26	126.23	122.13	2877	3010	3551	3733	3702	3627	99.73	88.95	126.207	107.45	3687.33	3146	0.217274	0.581855	0.126568	Etfdh	0610010I20Rik+++AV001013	mRNA	2	URS00009B4405+++NM_025794	coding	known	NC_000069.6	79603788	79628767	-	3 E3|3 34.91 cM	66841	NO_INFO	NO_INFO	66841	NA	NO_INFO	NA	COG0644///NA
75471	75471	1700009N14Rik	0	0	0	0.05	0	0	0	0	0	0.07	0	0	0	0	0	1	0	0	0.0166667	0	0.0233333	0	0.333333	0	0.949827	0.952797	0.815937	1700009N14Rik	AI429145	mRNA	1	NM_001081095	coding	known	NC_000070.6	39450293	39451780	+	4|4 A5	75471	NO_INFO	NO_INFO	75471	NA	K07936	NA	NA
16494	16494	Kcna6	0	0.02	0	0	0.02	0	0	0.02	0	0	0.02	0	0	2	0	0	1	0	0.00666667	0.00666667	0.00666667	0.00666667	0.333333	0.666667	-0.807082	0.952797	0.799725	Kcna6	Kv1.6+++MK1.6	mRNA	5	URS00009B1786+++NM_013568+++XM_006505638+++XM_006505639+++XM_011241228	coding	known	NC_000072.6	126705419	126740834	-	6 F3|6 61.72 cM	16494	NO_INFO	NO_INFO	16494	NA	NO_INFO	Kcna6	NA
320181	320181	Fndc7	0	0.07	0	0	0	0	0	0.08	0	0	0	0	0	4	0	0	0	0	0	0.0233333	0	0.0266667	0	1.33333	-2.75413	0.856483	0.400668	Fndc7	E230011A21Rik	mRNA	5	URS00009B3321+++NM_001165965+++NM_177091+++XM_011240139+++XM_030252643	coding	known	NC_000069.6	108853678	108890008	+	3|3 F3	320181	NO_INFO	NO_INFO	320181	NA	NO_INFO	NA	NA
320916	320916	Wscd2	0	0	0.03	0	0	0	0	0	0.03	0	0	0	0	0	2	0	0	0	0	0.01	0	0.01	0	0.666667	-1.7643	0.952797	0.662972	Wscd2	4933413A10Rik+++C530024P05Rik+++Gm450	mRNA	6	URS00009BB41C+++URS00009C0ACC+++XR_001784707+++NM_177292+++XM_017320928+++XM_030254582	coding	known	NC_000071.6	113489110	113597201	+	5|5 F	320916	NO_INFO	NO_INFO	320916	NA	NO_INFO	Wscd2	NA
100043387	100043387	Gm14305	2.03	1.57	2.82	1.79	1.2	1.61	2.21	1.9	3.72	2.33	1.48	2.02	43.41	38.76	72.15	45.08	29.25	40.34	1.53333	2.14	1.94333	2.61	38.2233	51.44	-0.431357	0.718633	0.229428	Gm14305	NA	mRNA	1	NM_001099327	coding	known	NC_000068.7	176708353	176721813	+	2 H4|2	100043387	NO_INFO	NO_INFO	100043387	NA	NO_INFO	NA	NA
73658	73658	Spns1	5.87	6.55	6.33	6.68	6.11	5.8	6.39	7.94	8.36	8.72	7.56	7.27	224	290	290	302	268	261	6.19667	6.25	7.85	7.56333	277	268	0.0447328	0.952797	0.787503	Spns1	2210013K02Rik+++Spin1+++Spinl	mRNA	2	NR_045537+++NM_023712	coding	known	NC_000073.6	126370060	126377934	-	7|7 F3	73658	NO_INFO	NO_INFO	73658	NA	NO_INFO	NA	NA
14544	14544	Gda	2.33	2.82	3.51	3.69	3.32	4.06	2.54	3.41	4.64	4.82	4.11	5.09	174	250	330	342	302	369	3.69	2.88667	4.67333	3.53	337.667	251.333	0.439967	0.303273	0.0299418	Gda	AU015411+++AW047581+++GAH	mRNA	6	URS00009AE3FF+++URS00009B6045+++URS00009BEE17+++NM_010266+++XM_006526680+++XM_017318064	coding	known	NC_000085.6	21391307	21472661	-	19 B|19 14.32 cM	14544	NO_INFO	NO_INFO	14544	NA	K01487	Gda	COG0402///NA
319748	319748	Zfp865	4.46	4	3.97	3.24	2.65	2.82	4.86	4.85	5.24	4.23	3.28	3.53	270	260	261	233	187	194	2.90333	4.14333	3.68	4.98333	204.667	263.667	-0.391122	0.406485	0.0536987	Zfp865	6430526N21Rik+++Znf865	mRNA	6	NM_001033383+++NM_001290426+++XM_006540059+++XM_006540060+++XM_017322299+++XM_017322300	coding	known	NC_000073.6	5020376	5033226	+	7|7 A1	319748	NO_INFO	NO_INFO	319748	NA	NO_INFO	NA	NA
83813	83813	Tnk1	0	0.11	0	0.02	0.04	0	0	0.13	0	0.03	0.05	0	0	5	0	1	2	0	0.02	0.0366667	0.0266667	0.0433333	1	1.66667	-0.640628	0.952797	0.759366	Tnk1	Kos1+++Tnk1a+++Tnk1b	mRNA	3	XR_879778+++NM_031880+++XM_006534554	coding	known	NC_000077.6	69850563	69858730	-	11|11 B3	83813	NO_INFO	NO_INFO	83813	NA	NO_INFO	NA	NA
14129	14129	Fcgr1	1.9	2.84	2.34	1.69	1.77	1.47	2.06	3.45	3.08	2.21	2.19	1.84	69	120	102	73	74	63	1.64333	2.36	2.08	2.86333	70	97	-0.45947	0.45774	0.0707925	Fcgr1	AI323638+++AV092959+++CD64+++FcgammaRI+++IGGHAFC	mRNA	1	NM_010186	coding	known	NC_000069.6	96282909	96293969	-	3 F2.1|3 41.72 cM	14129	NO_INFO	NO_INFO	14129	NA	K06498	Fcgr1	NA
70450	70450	Unc13d	0.36	0.49	0.4	0.41	0.3	0.27	0.39	0.6	0.53	0.53	0.37	0.34	22	34	28	28	20	19	0.326667	0.416667	0.413333	0.506667	22.3333	28	-0.326745	0.865282	0.421293	Unc13d	2610108D09Rik+++Jinx+++Munc13-4+++mFLJ00067	mRNA	6	XR_879738+++NM_001009573+++XM_006534188+++XM_006534189+++XM_006534190+++XM_006534192	coding	known	NC_000077.6	116062095	116078495	-	11|11 E2	70450	NO_INFO	NO_INFO	70450	NA	NO_INFO	NA	NA
76367	76367	Trp53rkb	0.6	0.9	0.99	0.79	0.44	1.01	0.65	1.09	1.31	1.03	0.54	1.26	16.94	29.45	32.28	20.88	21.04	28.03	0.746667	0.83	0.943333	1.01667	23.3167	26.2233	-0.139297	0.952797	0.741633	Trp53rkb	2810408M09Rik+++4933401B08Rik+++5630401H01Rik+++Nori-2+++PRPK+++Tp53rk+++Trp53rk+++Trp53tk+++mNori-2p	mRNA	3	NM_023815+++XM_006500371+++XM_030252188	coding	known	NC_000068.7	166792459	166799492	+	2|2 H3	76367	NO_INFO	NO_INFO	76367	NA	NO_INFO	NA	COG3642///NA
21349	21349	Tal1	0.18	0.16	0.31	0.11	0.16	0.27	0.19	0.19	0.4	0.14	0.19	0.34	11	11	22	7	11	20	0.18	0.216667	0.223333	0.26	12.6667	14.6667	-0.199665	0.952797	0.739444	Tal1	Hpt+++SCL/tal-1+++Scl+++bHLHa17+++tal-1	mRNA	10	NM_001287388+++NM_011527+++XM_006502909+++XM_006502910+++XM_006502912+++XM_006502913+++XM_006502914+++XM_006502915+++XM_006502916+++XM_030253382	coding	known	NC_000070.6	115056426	115071755	+	4 D1|4 52.73 cM	21349	NO_INFO	NO_INFO	21349	NA	NO_INFO	Tal1	NA
71994	71994	Cnn3	36.02	58.36	65.63	71.13	62.41	64.84	39.23	70.72	86.64	92.82	77.24	81.31	983	1845	2147	2295	1954	2083	66.1267	53.3367	83.79	65.53	2110.67	1658.33	0.376377	0.42212	0.0579319	Cnn3	1600014M03Rik+++C85854+++Calpo3	mRNA	3	URS00009AF136+++URS00009BF727+++NM_028044	coding	known	NC_000069.6	121424236	121458205	+	3|3 G1	71994	NO_INFO	NO_INFO	71994	NA	NO_INFO	Cnn3	NA
54394	54394	Crlf3	2.72	3.05	2.17	1.91	2.48	2.62	2.97	3.69	2.87	2.49	3.06	3.28	91	118	87	75	95	103	2.33667	2.64667	2.94333	3.17667	91	98.6667	-0.123483	0.952797	0.636525	Crlf3	BB164954+++Creme9+++Cytor4	mRNA	3	XR_001780029+++NM_001277106+++NM_018776	coding	known	NC_000077.6	80046493	80081153	-	11 B5|11 47.43 cM	54394	NO_INFO	NO_INFO	54394	NA	NO_INFO	Crlf3	NA
236266	236266	Alms1	0.26	0.16	0.2	0.14	0.18	0.16	0.29	0.19	0.26	0.19	0.23	0.2	40	28	36	26	32	28	0.16	0.206667	0.206667	0.246667	28.6667	34.6667	-0.303655	0.871529	0.434728	Alms1	bbb	mRNA	14	URS00009B27DB+++URS00009B9AD9+++URS00009B9CB2+++URS00009C244F+++URS00009C47EC+++XR_001785126+++XR_377445+++NM_145223+++XM_006506049+++XM_006506050+++XM_006506051+++XM_006506052+++XM_006506053+++XM_006506054	coding	known	NC_000072.6	85587498	85726611	+	6|6 C3	236266	NO_INFO	NO_INFO	236266	NA	NO_INFO	NA	NA
327987	327987	Med13	1.19	1	1.34	1.43	1.46	1.5	1.29	1.21	1.77	1.87	1.8	1.88	190	186	258	272	269	283	1.46333	1.17667	1.85	1.42333	274.667	211.333	0.369751	0.427497	0.0599158	Med13	1110067M05Rik+++D030023K18+++Thrap1+++Trap240	mRNA	8	URS00009AF401+++URS00009B1B12+++URS00009B8B5F+++URS00009B96C8+++URS00009BA095+++URS00009BFCC2+++URS00009C5E82+++NM_001080931	coding	known	NC_000077.6	86265715	86357596	-	11|11 C	327987	NO_INFO	NO_INFO	327987	NA	K15164	Med13	NA
14252	14252	Flot2	11.56	16.02	18.36	19.11	20.84	20.02	12.59	19.42	24.24	24.94	25.8	25.11	425	697	823	841	896	876	19.99	15.3133	25.2833	18.75	871	648.333	0.448087	0.197496	0.0141506	Flot2	AI573412+++Esa+++reggie-2	mRNA	10	URS00009B495E+++NM_001040403+++NM_001284227+++NM_001284228+++NM_001362625+++NM_001362626+++NM_001362627+++NM_008028+++XM_030245557+++XM_030245558	coding	known	NC_000077.6	78037931	78060434	+	11 B5|11 46.74 cM	14252	NO_INFO	NO_INFO	14252	NA	K07192	Flot2	COG2268///NA
72502	72502	Cwf19l1	5.29	6.07	4.24	3.99	3.96	5.05	5.77	7.35	5.6	5.21	4.9	6.33	225	295	218	209	189	257	4.33333	5.2	5.48	6.24	218.333	246	-0.182309	0.852138	0.392432	Cwf19l1	NA	mRNA	12	NM_001081077+++NM_001356578+++XM_006527364+++XM_011247357+++XM_011247358+++XM_017318296+++XM_017318297+++XM_030251083+++XM_030251084+++XM_030251085+++XM_030251086+++XM_030251087	coding	known	NC_000085.6	44108637	44135876	-	19|19 C3	72502	NO_INFO	NO_INFO	72502	NA	NO_INFO	NA	NA
56044	56044	Rala	8.92	9.31	7.6	9.5	9.62	7.89	9.72	11.28	10.03	12.39	11.91	9.89	335	405	342	422	415	349	9.00333	8.61	11.3967	10.3433	395.333	360.667	0.11983	0.908075	0.498914	Rala	3010001O15Rik+++AW322615+++Ral+++Rasl1	mRNA	2	URS0000BC73B9+++NM_019491	coding	known	NC_000079.6	17880575	17944217	+	13 A2|13 6.05 cM	56044	NO_INFO	NO_INFO	56044	NA	K07834	Rala	NA
240816	240816	Rgsl1	0.02	0	0	0	0	0	0.02	0	0	0	0	0	1	0	0	0	0	0	0	0.00666667	0	0.00666667	0	0.333333	-0.973727	0.952797	0.811392	Rgsl1	4930415K13Rik+++Gm202+++Rgsl2	mRNA	15	URS00009B1421+++URS00009C2E2A+++NM_001243223+++NM_001368270+++XM_006529574+++XM_006529576+++XM_006529577+++XM_006529579+++XM_006529582+++XM_011248001+++XM_011248002+++XM_017320546+++XM_017320548+++XM_017320549+++XM_017320550	coding	known	NC_000067.6	153777929	153847341	+	1|1 G3	240816	NO_INFO	NO_INFO	240816	NA	NO_INFO	NA	NA
12033	12033	Bcap29	3.54	2.45	3.27	2.25	2.93	3.12	3.86	2.97	4.32	2.94	3.63	3.91	86	70	94	67	82	91	2.76667	3.08667	3.49333	3.71667	80	83.3333	-0.077832	0.952797	0.782291	Bcap29	AW208404+++Bap29	mRNA	4	URS00009AEB0B+++URS00009B5FF2+++NM_001164090+++NM_007530	coding	known	NC_000078.6	31590967	31634658	-	12 A2- A3|12 13.63 cM	12033	NO_INFO	NO_INFO	12033	NA	NO_INFO	NA	NA
242705	242705	E2f2	0.06	0.09	0.38	0.16	0.11	0.06	0.06	0.11	0.5	0.21	0.14	0.07	4	6	32	14	8	5	0.11	0.176667	0.14	0.223333	9	14	-0.588879	0.882528	0.457122	E2f2	E2F-2	mRNA	4	URS00009BC44F+++NM_001305399+++NM_177733+++XM_030253574	coding	known	NC_000070.6	136172274	136196057	+	4|4 D3	242705	NO_INFO	NO_INFO	242705	NA	K09389	E2f2	NA
241226	241226	Itga8	0.42	0.76	0.35	0.49	0.66	0.74	0.46	0.93	0.46	0.65	0.82	0.93	32	74	36	50	63	76	0.63	0.51	0.8	0.616667	63	47.3333	0.431836	0.715713	0.227386	Itga8	AI447669	mRNA	5	NR_138462+++URS00009C3BAF+++NM_001001309+++XM_006497475+++XM_006497476	coding	known	NC_000068.7	12106632	12301985	-	2 A1|2 9.12 cM	241226	NO_INFO	NO_INFO	241226	NA	K06584	Itga8	NA
22619	22619	Siae	4.98	6.62	9.1	7.03	8.66	7.18	5.42	8.02	12.01	9.17	10.72	9	244	376	535	408	488	415	7.62333	6.9	9.63	8.48333	437	385	0.208457	0.826558	0.350371	Siae	LSE+++Ysg2	mRNA	1	NM_011734	coding	known	NC_000075.6	37613821	37648258	+	9 A4|9 20.79 cM	22619	NO_INFO	NO_INFO	22619	NA	NO_INFO	NA	NA
217835	217835	Rin3	6.51	8.7	8.25	8.53	7.32	7.23	7.09	10.55	10.9	11.14	9.07	9.06	332	527	550	537	455	459	7.69333	7.82	9.75667	9.51333	483.667	469.667	0.0540432	0.952797	0.747611	Rin3	6430500K07+++C86933	mRNA	8	URS00009B2C4A+++URS00009B5184+++URS00009B5373+++XR_003950041+++NM_001161365+++NM_177620+++XM_030246670+++XM_030246671	coding	known	NC_000078.6	102282840	102390854	+	12|12 E	217835	NO_INFO	NO_INFO	217835	NA	NO_INFO	Rin3	NA
14635	14635	Galk1	31.03	48.49	38.07	42.88	40.06	37.69	33.79	58.75	50.26	55.96	49.59	47.26	607	1098	892	990	897	866	40.21	39.1967	50.9367	47.6	917.667	865.667	0.0985982	0.935889	0.558631	Galk1	AA409894+++GALK+++Gk+++Glk+++Glk1	mRNA	1	NM_016905	coding	known	NC_000077.6	116008357	116012719	-	11 E2|11 80.91 cM	14635	NO_INFO	NO_INFO	14635	NA	K00849	Galk1	COG0153///NA
208768	208768	Sde2	1.38	2.73	2.52	2.47	1.88	2.22	1.5	3.31	3.32	3.23	2.33	2.79	63	145	138	134	99	120	2.19	2.21	2.78333	2.71	117.667	115.333	0.0562344	0.960145	0.834208	Sde2	NA	mRNA	2	URS00009B8119+++NM_145943	coding	known	NC_000067.6	180851151	180868113	+	1|1 H4	208768	NO_INFO	NO_INFO	208768	NA	NO_INFO	Sde2	NA
75624	75624	Metap1	4.61	6.99	8.85	7.6	7.64	7.28	5.02	8.47	11.69	9.92	9.45	9.13	165	290	380	322	314	307	7.50667	6.81667	9.5	8.39333	314.333	278.333	0.202747	0.837908	0.364938	Metap1	1700029C17Rik+++AW047992+++mKIAA0094	mRNA	1	NM_175224	coding	known	NC_000069.6	138458960	138489382	-	3|3 G3	75624	NO_INFO	NO_INFO	75624	NA	NO_INFO	NA	COG0024///NA
70478	70478	Mipep	7.92	9.62	12.47	8.74	11.7	9.28	8.63	11.65	16.47	11.4	14.48	11.64	265	374	502	347	451	367	9.90667	10.0033	12.5067	12.25	388.333	380.333	0.048805	0.953662	0.817754	Mipep	5730405E07Rik+++MIP	mRNA	3	NR_040642+++NM_027436+++XM_006519508	coding	known	NC_000080.6	60784562	60905481	+	14|14 D1	70478	NO_INFO	NO_INFO	70478	NA	NO_INFO	Mipep	NA
12352	12352	Car5a	73.25	84.05	128.47	110.07	112.22	84.31	79.77	101.85	169.6	143.64	138.9	105.73	1139	1512	2391	2017	1993	1537	102.2	95.2567	129.423	117.073	1849	1680.67	0.15572	0.894754	0.474123	Car5a	CAV+++Ca5a+++Car5	mRNA	5	URS000077AE8F+++URS00009B7FBD+++URS00009BCAA2+++URS00009BDAB3+++NM_007608	coding	known	NC_000074.6	121916135	121944912	+	8 E1|8 70.81 cM	12352	NO_INFO	NO_INFO	12352	NA	K01672	NA	NA
103266	103266	Tmem263	1.49	0.99	0.88	1.01	1.14	0.88	1.63	1.2	1.16	1.32	1.41	1.1	82	63	58	66	72	57	1.01	1.12	1.27667	1.33	65	67.6667	-0.0974047	0.952797	0.756966	Tmem263	AI597468	mRNA	1	NM_001013028	coding	known	NC_000076.6	85102627	85117747	+	10|10 C1	103266	NO_INFO	NO_INFO	103266	NA	NO_INFO	NA	NA
58220	58220	Pard6b	0.96	1.13	1.28	1.27	1.05	1.09	1.04	1.37	1.68	1.66	1.3	1.37	47	64	75	74	59	63	1.13667	1.12333	1.44333	1.36333	65.3333	62	0.0787257	0.952797	0.773283	Pard6b	AV025615+++Par6b	mRNA	2	URS00009C11F0+++NM_021409	coding	known	NC_000068.7	168081004	168101203	+	2|2 H3	58220	NO_INFO	NO_INFO	58220	NA	K06093	NA	NA
56642	56642	Ankrd2	0.89	0.32	0.31	0.5	0.26	0.51	0.97	0.39	0.41	0.66	0.32	0.64	12	5	5	8	4	8	0.423333	0.506667	0.54	0.59	6.66667	7.33333	-0.21497	0.952797	0.784867	Ankrd2	Arpp	mRNA	3	NM_020033+++XM_006527234+++XM_017318264	coding	known	NC_000085.6	42035917	42045111	+	19|19 C3	56642	NO_INFO	NO_INFO	56642	NA	NO_INFO	NA	NA
224530	224530	Acat3	122.79	87.2	83.8	49.38	77.73	63.96	133.72	105.68	110.64	64.44	96.21	80.2	3568.91	2877.89	2847.69	1657.39	2537.97	2143.26	63.69	97.93	80.2833	116.68	2112.87	3098.16	-0.588663	0.194671	0.0137869	Acat3	ACTL	mRNA	2	NM_153151+++XM_030249675	coding	known	NC_000083.6	12923830	12940595	-	17 A1|17 8.72 cM	224530	NO_INFO	NO_INFO	224530	NA	K00626	NA	COG0183///NA
83669	83669	Wdr6	2.08	2.75	3.09	4.2	4.68	4.12	2.27	3.34	4.07	5.48	5.8	5.16	126	193	224	301	326	294	4.33333	2.64	5.48	3.22667	307	181	0.776544	0.00435782	6.48606e-05	Wdr6	NA	mRNA	1	NM_031392	coding	known	NC_000075.6	108572311	108578713	-	9|9 F2	83669	NO_INFO	NO_INFO	83669	NA	NO_INFO	Wdr6	NA
57780	57780	Fxyd7	2.54	1.04	0.25	0.64	0.4	0.52	2.77	1.26	0.33	0.84	0.49	0.65	17	8	2	5	3	4	0.52	1.27667	0.66	1.45333	4	9	-1.28257	0.642849	0.162577	Fxyd7	1110035I01Rik	mRNA	1	NM_022007	coding	known	NC_000073.6	31042515	31051454	-	7|7 B1	57780	NO_INFO	NO_INFO	57780	NA	NO_INFO	NA	NA
56720	56720	Tdo2	650.27	746.97	621.57	719.08	770.42	782.22	708.19	905.19	820.59	938.39	953.6	980.9	14025	18655	16062	18315	19034	19831	757.24	672.937	957.63	811.323	19060	16247.3	0.226549	0.514482	0.0906765	Tdo2	AA407491+++TDO+++TO+++chky	mRNA	1	NM_019911	coding	known	NC_000069.6	81958412	81975728	-	3|3 E3	56720	NO_INFO	NO_INFO	56720	NA	K00453	NA	COG3483///NA
22370	22370	Vtn	1797.38	1964.3	1674.51	1957.49	1628.27	1783.35	1957.47	2380.36	2210.68	2554.49	2015.41	2236.3	41840	52956	46712	53833	43443	48822	1789.7	1812.06	2268.73	2182.84	48699.3	47169.3	0.0352017	0.952797	0.797055	Vtn	AI256434+++Vn	mRNA	1	NM_011707	coding	known	NC_000077.6	78499120	78502325	+	11 B5|11 46.74 cM	22370	NO_INFO	NO_INFO	22370	NA	K06251	Vtn	NA
232906	232906	Arhgap35	8.8	11.47	11.38	16.13	11.72	12.45	9.58	13.9	15.03	21.04	14.5	15.62	1001	1511	1554	2180	1539	1674	13.4333	10.55	17.0533	12.8367	1797.67	1355.33	0.413462	0.191623	0.0134522	Arhgap35	6430596G11Rik+++AI841135+++Grlf1+++mKIAA1722+++p190A+++p190RhoGAP	mRNA	6	URS00009B56EE+++URS00009BC460+++URS00009C0D55+++NM_172739+++XM_006539809+++XM_011250512	coding	known	NC_000073.6	16493720	16614993	-	7|7 A2	232906	NO_INFO	NO_INFO	232906	NA	K05732	NA	NA
434246	434246	Trim72	0.14	0.05	0.05	0.02	0.1	0.05	0.16	0.06	0.06	0.03	0.12	0.06	5	2	2	1	4	2	0.0566667	0.08	0.07	0.0933333	2.33333	3	-0.424205	0.952797	0.724184	Trim72	BC067209+++MG53	mRNA	7	URS0000784D9A+++URS00009B22FC+++URS00009B39EC+++URS00009C60C5+++NM_001079932+++XM_006508002+++XM_006508003	coding	known	NC_000073.6	128001899	128011393	+	7|7 F3	434246	NO_INFO	NO_INFO	434246	NA	NO_INFO	NA	NA
50915	50915	Grb14	26.74	26.38	22.61	24.39	30.55	26.92	29.12	31.97	29.86	31.82	37.81	33.76	682	809	718	759	904	823	27.2867	25.2433	34.4633	30.3167	828.667	736.333	0.160615	0.807456	0.330744	Grb14	AI505286	mRNA	3	URS00009B2C96+++NM_016719+++XM_006499883	coding	known	NC_000068.7	64912476	65022766	-	2|2 C1.3	50915	NO_INFO	NO_INFO	50915	NA	NO_INFO	Grb14	NA
54721	54721	Tyk2	3.81	5.25	4.26	3.62	3.89	3.31	4.14	6.37	5.62	4.72	4.81	4.14	234	374	360	280	289	256	3.60667	4.44	4.55667	5.37667	275	322.667	-0.219119	0.700087	0.213952	Tyk2	JTK1	mRNA	9	XR_001778942+++NM_001205312+++NM_018793+++XM_006510492+++XM_006510494+++XM_011242579+++XM_030244455+++XM_030244456+++XM_030244457	coding	known	NC_000075.6	21104068	21131393	-	9|9 A3	54721	NO_INFO	NO_INFO	54721	NA	K11219	NA	NA
18647	18647	Cdk14	0.24	0.3	0.25	0.23	0.34	0.22	0.27	0.36	0.33	0.3	0.42	0.28	17	24	22	20	27	19	0.263333	0.263333	0.333333	0.32	22	21	0.0706604	0.973023	0.870647	Cdk14	Pftk1+++mKIAA0834	mRNA	16	URS0000811734+++URS00008119DD+++URS0000811A11+++URS0000811BAD+++URS0000811C4D+++URS0000811DAD+++URS0000811DCD+++URS00009B8BFE+++URS00009BFC94+++URS00009C4305+++URS00009C56A2+++NM_001310448+++NM_011074+++XM_006503544+++XM_006503547+++XM_017320708	coding	known	NC_000071.6	4803384	5380251	+	5 A1|5 2.61 cM	18647	NO_INFO	NO_INFO	18647	NA	K08821	Cdk14	NA
56428	56428	Mtch2	99.03	81.69	70.71	90.3	94.63	88.29	107.86	98.99	93.35	117.84	117.13	110.72	1812	1798	1681	2114	2103	2085	91.0733	83.81	115.23	100.067	2100.67	1763.67	0.226441	0.658639	0.176275	Mtch2	2310034D24Rik+++4930539J07Rik+++HSPC032	mRNA	11	NM_001317241+++NM_001317242+++NM_001317243+++NM_001317244+++NM_019758+++XM_017319137+++rna-NM_001317241.1-2+++rna-NM_001317242.1-2+++rna-NM_001317243.1-2+++rna-NM_001317244.1-2+++rna-NM_019758.3-2	coding	known	NW_016097315.1	975	90866810	+	2|2 E1	56428	NO_INFO	NO_INFO	56428	NA	NO_INFO	NA	NA
327766	327766	Tmem26	0.15	0.36	0.3	0.23	0.22	0.2	0.16	0.43	0.4	0.29	0.27	0.26	11	31	27	20	19	18	0.216667	0.27	0.273333	0.33	19	23	-0.244329	0.948717	0.599028	Tmem26	3230401A06+++AI195372	mRNA	3	URS00009C5088+++NM_177794+++XM_006513768	coding	known	NC_000076.6	68723746	68782655	+	10|10 B5.3	327766	NO_INFO	NO_INFO	327766	NA	NO_INFO	Tmem26	NA
56458	56458	Foxo1	5.38	7.57	7.81	10.19	8.27	8.7	5.86	9.17	10.31	13.3	10.24	10.91	444	724	773	997	786	848	9.05333	6.92	11.4833	8.44667	877	647	0.452661	0.140992	0.00830652	Foxo1	AI876417+++Afxh+++FKHR+++Fkhr1+++Foxo1a	mRNA	5	URS0000811C0C+++URS00009B0AA5+++URS00009B42E0+++URS00009C13ED+++NM_019739	coding	known	NC_000069.6	52268337	52353221	+	3 C|3 23.19 cM	56458	NO_INFO	NO_INFO	56458	NA	K07201	Foxo1	NA
81897	81897	Tlr9	0.04	0.24	0.3	0.05	0.12	0.1	0.04	0.29	0.4	0.07	0.15	0.13	2	14	18	3	7	6	0.09	0.193333	0.116667	0.243333	5.33333	11.3333	-1.01225	0.700628	0.214512	Tlr9	NA	mRNA	1	NM_031178	coding	known	NC_000075.6	106222598	106226876	+	9|9 F1	81897	NO_INFO	NO_INFO	81897	NA	K10161	Tlr9	NA
14979	14979	H2-Ke6	103.2	104.7	88.15	83.03	80.71	81.06	112.39	126.88	116.38	108.35	99.9	101.64	1149	1347	1173	1086	1022	1054	81.6	98.6833	103.297	118.55	1054	1223	-0.229407	0.579056	0.124589	H2-Ke6	D17H6S112E+++H-2Ke6+++Hsd17b8+++Ke-6+++Ke6+++Ring2	mRNA	5	URS00009C3214+++NM_013543+++rna-NM_013543.2-2+++rna-NM_013543.2-3+++rna-NM_013543.2-4	coding	known	NT_187004.1	274971	34028055	-	17 B1|17 17.98 cM	14979	NO_INFO	NO_INFO	14979	NA	K13370	H2-Ke6	NA
22127	22127	Tsx	0	0.1	0	0	0	0	0	0.13	0	0	0	0	0	1	0	0	0	0	0	0.0333333	0	0.0433333	0	0.333333	-0.973727	0.952797	0.811392	Tsx	AV207184	mRNA	6	URS00009B3039+++URS00009C09C4+++NM_009440+++XM_006527940+++XM_006527941+++XM_030251301	coding	known	NC_000086.7	103409012	103428412	+	X D|X 46.12 cM	22127	NO_INFO	NO_INFO	22127	NA	NO_INFO	NA	NA
244058	244058	Rgma	0.1	0.28	0.08	0.17	0.1	0.1	0.11	0.34	0.11	0.22	0.13	0.13	5	17	5	10	6	6	0.123333	0.153333	0.16	0.186667	7.33333	9	-0.27541	0.952797	0.713324	Rgma	BC059072+++C230063O06	mRNA	2	NM_177740+++XM_006540902	coding	known	NC_000073.6	73375520	73419899	+	7|7 D1	244058	NO_INFO	NO_INFO	244058	NA	K23096	Rgma	NA
102640673	102640673	LOC102640673	1.93	1.49	0.98	0.89	1.6	1.6	2.1	1.81	1.3	1.16	1.99	2.01	66.02	59.22	40.28	35.99	63.01	64.48	1.36333	1.46667	1.72	1.73667	54.4933	55.1733	-0.0593033	0.974351	0.874831	LOC102640673	EG382161	mRNA	8	URS00009AE3D4+++URS00009B10A6+++URS00009B577F+++URS00009B5FEC+++URS00009B7923+++URS00009BE1C0+++URS0000D71BCD+++NM_001362181	coding	known	NC_000083.6	17202666	17267023	+	17|17 A3.1- A3.2	102640673	NO_INFO	NO_INFO	102640673	NA	NO_INFO	NA	NA
76747	76747	Dapl1	0.2	0.17	0.17	0	0	0	0.22	0.21	0.22	0	0	0	1	1	1	0	0	0	0	0.18	0	0.216667	0	1	-2.46113	0.837217	0.364326	Dapl1	2310032F03Rik+++EEDA	mRNA	1	NM_029723	coding	known	NC_000068.7	59484653	59505020	+	2|2 C1.1	76747	NO_INFO	NO_INFO	76747	NA	NO_INFO	Dapl1	NA
72562	72562	Pcbd2	60.12	51.87	40.5	34.64	40.32	39.48	65.48	62.86	53.47	45.21	49.91	49.5	293	290	234	197	216	223	38.1467	50.83	48.2067	60.6033	212	272.333	-0.389124	0.486583	0.0796951	Pcbd2	2700061N24Rik+++Dcoh2+++Dcohm	mRNA	7	URS00009BC7A2+++NM_028281+++XM_006517398+++XM_006517399+++XM_006517401+++XM_011244564+++XM_030247422	coding	known	NC_000079.6	55727097	55776830	+	13|13 B1	72562	NO_INFO	NO_INFO	72562	NA	K01724	NA	COG2154///NA
100504608	100504608	Eef1akmt3	0	0.12	0.12	0.12	0	0	0	0.15	0.16	0.16	0	0	0	1	1	1	0	0	0.04	0.08	0.0533333	0.103333	0.333333	0.666667	-0.816812	0.952797	0.775315	Eef1akmt3	EG546486+++Fam119b+++Gm16109+++Mettl21b	mRNA	2	NM_001205036+++XM_017313752	coding	known	NC_000076.6	127032806	127042014	-	10|10 D3	100504608	NO_INFO	NO_INFO	100504608	NA	NO_INFO	NA	NA
20467	20467	Sin3b	35.2	35.52	31.72	30.23	36.08	34.04	38.34	43.05	41.88	39.45	44.65	42.69	565	637	598	566	611	627	33.45	34.1467	42.2633	41.09	601.333	600	-0.00941035	0.999812	0.953407	Sin3b	2810430C10Rik	mRNA	3	NM_001113248+++NM_009188+++XM_006530789	coding	known	NC_000074.6	72723270	72758203	+	8 B3.3|8 35.08 cM	20467	NO_INFO	NO_INFO	20467	NA	NO_INFO	NA	NA
72981	72981	Thap12	4.34	7.35	9.1	7.07	7.4	7.67	4.73	8.91	12.01	9.23	9.16	9.62	230	453	582	452	451	480	7.38	6.93	9.33667	8.55	461	421.667	0.164092	0.898355	0.483799	Thap12	2900052B10Rik+++Dap4+++Prkrir+++Rpkrir	mRNA	4	NM_001355114+++NM_028410+++XM_006508224+++XM_011241915	coding	known	NC_000073.6	98703036	98718062	+	7|7 E1	72981	NO_INFO	NO_INFO	72981	NA	NO_INFO	NA	NA
15116	15116	Has1	0.01	0	0	0.01	0	0	0.01	0	0.01	0.01	0	0	1	0	1	2	0	0	0.00333333	0.00333333	0.00333333	0.00666667	0.666667	0.666667	-0.0949365	0.999812	0.970491	Has1	HAS	mRNA	2	NM_008215+++XM_011246309	coding	known	NC_000083.6	17833691	17855589	-	17 A3.2|17 10.53 cM	15116	NO_INFO	NO_INFO	15116	NA	NO_INFO	Has1	COG1215///NA
19217	19217	Ptger2	0.11	0.38	0.31	0.12	0.19	0.19	0.12	0.46	0.41	0.16	0.24	0.24	5	24	15	7	8	7	0.166667	0.266667	0.213333	0.33	7.33333	14.6667	-0.950169	0.630771	0.154127	Ptger2	EP2+++Ptgerep2	mRNA	4	URS0000CC9772+++URS0000CCBD8D+++NM_008964+++XM_006518720	coding	known	NC_000080.6	44976162	45003820	+	14 C1|14 22.68 cM	19217	NO_INFO	NO_INFO	19217	NA	K04259	NA	NA
20682	20682	Sox9	0.84	0.92	0.69	0.67	0.79	0.77	0.92	1.12	0.91	0.87	0.98	0.96	51	65	50	48	55	55	0.743333	0.816667	0.936667	0.983333	52.6667	55.3333	-0.0786598	0.952797	0.790494	Sox9	2010306G03Rik+++AV220920+++mKIAA4243+++mSox9	mRNA	2	URS00009B19B5+++NM_011448	coding	known	NC_000077.6	112782210	112787757	+	11 E2|11 77.27 cM	20682	NO_INFO	NO_INFO	20682	NA	K18435	Sox9	NA
56305	56305	Pitpnb	20.13	20.69	19.61	20.86	19.54	17.56	21.92	25.07	25.88	27.22	24.18	22.02	769	929	917	962	875	808	19.32	20.1433	24.4733	24.29	881.667	871.667	0.00789595	0.999812	0.955567	Pitpnb	PI-TP-beta	mRNA	8	URS0000811B07+++NM_001301643+++NM_001301644+++NM_001301666+++NM_001359215+++NM_001359216+++NM_001359217+++NM_019640	coding	known	NC_000071.6	111330697	111388359	+	5|5 F	56305	NO_INFO	NO_INFO	56305	NA	NO_INFO	NA	NA
76954	76954	St5	5.2	5.66	4.85	6.62	6.86	5.9	5.67	6.86	6.4	8.64	8.49	7.4	266	403	361	489	499	435	6.46	5.23667	8.17667	6.31	474.333	343.333	0.471975	0.0841369	0.00380377	St5	2010004M01Rik+++2610305K15Rik+++Dennd2b+++St5	mRNA	21	NR_037617+++URS00009BB923+++URS00009BC2DC+++URS0000A93130+++XR_003946582+++NM_001001326+++NM_029811+++XM_006508320+++XM_011241940+++XM_011241941+++XM_011241942+++XM_011241944+++XM_011241945+++XM_030243084+++XM_030243085+++XM_030243086+++XM_030243087+++XM_030243088+++XM_030243089+++XM_030243090+++XM_030243091	coding	known	NC_000073.6	109523911	109703718	+	7 E3|7 57.27 cM	76954	NO_INFO	NO_INFO	76954	NA	NO_INFO	Denn2b	NA
240396	240396	Mex3c	1.78	2.41	3.01	3.46	3.04	3.25	1.93	2.93	3.98	4.52	3.76	4.08	108	169	217	248	209	231	3.25	2.4	4.12	2.94667	229.333	164.667	0.493918	0.262331	0.0224154	Mex3c	A130001D14Rik+++BC035207+++BM-013+++Rkhd2	mRNA	4	URS00009BC5E6+++URS00009C48B0+++NM_001039214+++XM_011246932	coding	known	NC_000084.6	73572637	73592578	+	18|18 E2	240396	NO_INFO	NO_INFO	240396	NA	NO_INFO	NA	NA
16542	16542	Kdr	4.49	5.11	7.14	6.45	6.03	6.8	4.89	6.19	9.43	8.42	7.47	8.52	396	523	741	675	613	707	6.42667	5.58	8.13667	6.83667	665	553.333	0.277632	0.615948	0.144322	Kdr	6130401C07+++Flk-1+++Flk1+++Krd-1+++Ly73+++VEGFR-2+++VEGFR2+++orv+++sVEGFR-2	mRNA	3	NM_001363216+++NM_010612+++XM_011240817	coding	known	NC_000071.6	75932827	75979072	-	5 C3.3|5 40.23 cM	16542	NO_INFO	NO_INFO	16542	NA	K05098	Kdr	NA
13167	13167	Dbi	2807.85	1978.1	1816.13	2029.71	1948.7	1925.88	3057.95	2397.08	2397.64	2648.74	2412.02	2415.03	14804	11994	11380	12424	11493	11686	1968.1	2200.69	2491.93	2617.56	11867.7	12726	-0.146107	0.897323	0.481299	Dbi	ACBD1+++Acbp+++EP+++endozepine	mRNA	2	NM_001037999+++NM_007830	coding	known	NC_000067.6	120113280	120121096	-	1|1 E2.3	13167	NO_INFO	NO_INFO	13167	NA	K08762	Dbi	NA
56427	56427	Tubd1	1.43	1.46	1.42	1.2	1.53	1.26	1.56	1.77	1.87	1.57	1.89	1.57	43	46	43	39	46	38	1.33	1.43667	1.67667	1.73333	41	44	-0.114426	0.952797	0.723517	Tubd1	4930550G19Rik+++Tubd	mRNA	6	URS00009BA562+++NM_001199045+++NM_001199046+++NM_001199047+++NM_019756+++XM_006533800	coding	known	NC_000077.6	86544991	86571608	+	11|11 C	56427	NO_INFO	NO_INFO	56427	NA	NO_INFO	NA	NA
224440	224440	Setd4	2.56	1.48	1.54	2.43	1.33	1.65	2.79	1.8	2.03	3.17	1.65	2.06	67	46	51	74	41	52	1.80333	1.86	2.29333	2.20667	55.6667	54.6667	-0.0226936	0.999748	0.948722	Setd4	AY037804+++C21orf18+++ORF21	mRNA	27	URS00009B751B+++URS00009BDF41+++URS00009C0208+++URS00009C4358+++URS0000DBB7CE+++XR_001781817+++XR_001781818+++XR_001781819+++XR_003951785+++XR_003951786+++XR_003951787+++XR_003951788+++XR_003951789+++NM_145482+++XM_006523015+++XM_006523016+++XM_006523017+++XM_006523018+++XM_011246121+++XM_017316973+++XM_017316977+++XM_017316978+++XM_030249095+++XM_030249096+++XM_030249097+++XM_030249098+++XM_0302…	coding	known	NC_000082.6	93583457	93604968	+	16|16 C4	224440	NO_INFO	NO_INFO	224440	NA	NO_INFO	NA	NA
14375	14375	Xrcc6	7.07	8.54	5.93	5.42	6.09	6.31	7.7	10.35	7.83	7.07	7.54	7.91	203	287	205	185	203	215	5.94	7.18	7.50667	8.62667	201	231.667	-0.208813	0.792809	0.311056	Xrcc6	70kDa+++G22p1+++Ku70	mRNA	10	URS00009BEA58+++URS00009C0DA2+++URS00009C50B3+++XR_383982+++NM_010247+++XM_006520442+++XM_006520443+++XM_006520444+++XM_006520445+++XM_011245456	coding	known	NC_000081.6	81987833	82040256	+	15 E1|15 38.33 cM	14375	NO_INFO	NO_INFO	14375	NA	K10884	NA	NA
70356	70356	St13	51.62	100.73	94.93	91.64	79.15	82.27	56.22	122.07	125.32	119.59	97.97	103.16	1103	2492	2430	2312	1937	2066	84.3533	82.4267	106.907	101.203	2105	2008.33	0.102316	0.952797	0.631617	St13	1110007I03Rik+++3110002K08Rik+++AW555194+++HIP+++HOP+++HSPABP+++HSPABP1+++PRO0786+++SNC6+++p48	mRNA	2	URS00009BB683+++NM_133726	coding	known	NC_000081.6	81365044	81399694	-	15|15 E1	70356	NO_INFO	NO_INFO	70356	NA	NO_INFO	NA	NA
101100	101100	Ttll3	0.52	0.51	0.2	0.16	0.15	0.32	0.57	0.62	0.27	0.21	0.19	0.4	22.03	24.05	11	7.03	8	17	0.21	0.41	0.266667	0.486667	10.6767	19.0267	-0.862877	0.62201	0.148381	Ttll3	4833441J24Rik+++AI450050	mRNA	2	NM_001142732+++NM_133923	coding	known	NC_000072.6	113389260	113414592	+	6|6 E3	101100	NO_INFO	NO_INFO	101100	NA	NO_INFO	NA	NA
19377	19377	Rai1	1.78	2.09	1.68	1.34	1.23	1.41	1.93	2.54	2.22	1.74	1.53	1.77	196	268	223	175	157	184	1.32667	1.85	1.68	2.23	172	229	-0.41701	0.291916	0.0278067	Rai1	Gt1	mRNA	8	URS00009B6A39+++URS00009BE4B5+++XR_003949361+++XR_879537+++XR_879538+++XR_879539+++NM_001037764+++NM_009021	coding	known	NC_000077.6	60104917	60199197	+	11|11 B1.3- B2	19377	NO_INFO	NO_INFO	19377	NA	NO_INFO	Rai1	NA
224024	224024	Scarf2	2.06	2.65	2	1.76	1.57	1.6	2.24	3.21	2.64	2.29	1.95	2.01	98	146	114	99	86	90	1.64333	2.23667	2.08333	2.69667	91.6667	119.333	-0.381616	0.527299	0.0963037	Scarf2	NSR1+++SREC-II+++SRECRP-1+++Scatf1+++Srec2+++SrecII	mRNA	4	XR_384554+++NM_153790+++XM_006522042+++rna-NM_153790.3-2	coding	known	NT_187007.1	54789	17808294	+	16|16 A3	224024	NO_INFO	NO_INFO	224024	NA	NO_INFO	Scarf2	NA
353328	353328	Muc6	0	0.01	0	0	0	0	0	0.01	0	0	0	0	0	1	0	0	0	0	0	0.00333333	0	0.00333333	0	0.333333	-0.973727	0.952797	0.811392	Muc6	NA	mRNA	7	URS00009B42AF+++NM_001330001+++NM_001368953+++XM_030242710+++XM_030242711+++XM_030242712+++XM_030242713	coding	known	NC_000073.6	141633460	141655410	+	7 F5|7 87.03 cM	353328	NO_INFO	NO_INFO	353328	NA	NO_INFO	NA	NA
69847	69847	Wnk4	0.54	0.59	0.26	1.48	0.95	0.74	0.59	0.72	0.34	1.93	1.17	0.93	28	40	18	103	65	49	1.05667	0.463333	1.34333	0.55	72.3333	28.6667	1.31357	0.0322072	0.000888819	Wnk4	2010002J11Rik+++Pha2b+++Prkwnk4	mRNA	9	URS000076D0B8+++URS00009B8401+++NM_175638+++XM_006534136+++XM_006534137+++XM_006534138+++XM_006534139+++XM_006534141+++XM_017314744	coding	known	NC_000077.6	101260537	101277409	+	11|11 D	69847	NO_INFO	NO_INFO	69847	NA	NO_INFO	Wnk4	NA
14221	14221	Fjx1	0.06	0.05	0	0.02	0.05	0.08	0.06	0.06	0	0.03	0.06	0.09	2	2	0	1	2	3	0.05	0.0366667	0.06	0.04	2	1.33333	0.541885	0.952797	0.722989	Fjx1	NA	mRNA	1	NM_010218	coding	known	NC_000068.7	102449366	102451792	-	2|2 E2	14221	NO_INFO	NO_INFO	14221	NA	K16674	Fjx1	NA
211253	211253	Mtrf1	4.16	5.05	3.68	2.37	3.05	3.74	4.53	6.12	4.85	3.09	3.78	4.7	101	143	107	69	85	107	3.05333	4.29667	3.85667	5.16667	87	117	-0.428192	0.543736	0.104036	Mtrf1	A830062K05Rik+++MtRF-1	mRNA	4	XR_003950832+++NM_145960+++XM_006518772+++XM_017315939	coding	known	NC_000080.6	79397765	79423650	+	14|14 D3	211253	NO_INFO	NO_INFO	211253	NA	NO_INFO	NA	COG0216///NA
72823	72823	Pard3b	0.54	0.54	0.4	0.42	0.59	0.51	0.59	0.66	0.53	0.55	0.73	0.64	65	76	62	59	81	74	0.506667	0.493333	0.64	0.593333	71.3333	67.6667	0.0665568	0.952797	0.813611	Pard3b	1810008K04Rik+++2010002N16Rik+++2810455B10Rik+++Als2cr19+++PAR3B+++PAR3L+++PAR3beta	mRNA	17	URS0000779FF0+++URS0000788D1B+++URS00009AD87C+++URS00009AED6E+++URS00009AF06F+++URS00009B09D2+++URS00009B1C4A+++URS00009B2306+++URS00009B2991+++URS00009B3286+++URS00009B3F51+++URS00009BC16D+++URS00009BFCFC+++NM_001081050+++XM_006496298+++XM_006496299+++XM_011238602	coding	known	NC_000067.6	61638667	62642284	+	1|1 C2	72823	NO_INFO	NO_INFO	72823	NA	NO_INFO	Pard3b	NA
67078	67078	Pgp	8.42	14.53	10.65	12.88	9.69	9.03	9.17	17.61	14.07	16.81	11.99	11.32	307	614	466	556	406	388	10.5333	11.2	13.3733	13.6167	450	462.333	-0.0235522	0.984972	0.912344	Pgp	1700012G19Rik+++AI481330+++AUM+++G3PP	mRNA	1	NM_025954	coding	known	NC_000083.6	24470426	24473110	+	17|17 A3.3	67078	NO_INFO	NO_INFO	67078	NA	K19269	NA	NA
69398	69398	Cdhr4	0.03	0	0	0.07	0	0.02	0.03	0	0	0.09	0	0.03	1	0	0	3	0	1	0.03	0.01	0.04	0.01	1.33333	0.333333	1.85752	0.871468	0.434032	Cdhr4	AU017982+++Cdh29	mRNA	2	URS00009C43A2+++XM_003688869	coding	known	NC_000075.6	107992469	107999683	+	9|9 F1	69398	NO_INFO	NO_INFO	69398	NA	NO_INFO	Cdhr4	NA
408067	408067	Zfp874b	1.41	1.46	1.21	1.16	1.3	1.11	1.54	1.77	1.6	1.51	1.61	1.39	82	101	85.2	86.17	88	81	1.19	1.36	1.50333	1.63667	85.0567	89.4	-0.0805939	0.952797	0.739433	Zfp874b	9630025I21Rik+++Rslcan16	mRNA	8	URS0000BCC01C+++NM_001076791+++XM_006517283+++XM_011244535+++XM_011244536+++XM_030247315+++XM_030247316+++XM_030247318	coding	known	NC_000079.6	67471513	67486241	+	13|13 B3	408067	NO_INFO	NO_INFO	408067	NA	K09228	NA	NA
68852	68852	Lrrn4cl	0.03	0.07	0.07	0.17	0	0.07	0.03	0.09	0.09	0.22	0	0.09	1	3	3	7	0	3	0.08	0.0566667	0.103333	0.07	3.33333	2.33333	0.52548	0.952797	0.68642	Lrrn4cl	1110067I12Rik	mRNA	3	URS00009BD315+++NM_001013019+++NM_001360628	coding	known	NC_000085.6	8850768	8853909	+	19|19 A	68852	NO_INFO	NO_INFO	68852	NA	NO_INFO	Lrrn4cl	NA
378425	378425	Nlrp12	22.77	10.86	14.74	11.86	19.71	15.52	24.8	13.16	19.46	15.48	24.4	19.46	1469.71	816.93	1133.58	912.89	1472.24	1184.28	15.6967	16.1233	19.78	19.14	1189.8	1140.07	0.00858272	0.999812	0.976524	Nlrp12	Nalp12+++PYPAF7+++monarch-1	mRNA	4	XR_881738+++NM_001033431+++XM_006540131+++XM_017322321	coding	known	NC_000073.6	3218643	3249771	-	7|7 A1	378425	NO_INFO	NO_INFO	378425	NA	K20865	Nlrp12	NA
29863	29863	Pde7b	0.53	0.6	0.67	0.96	0.82	1.12	0.58	0.73	0.88	1.25	1.02	1.4	40	52	60	85	71	99	0.966667	0.6	1.22333	0.73	85	50.6667	0.748034	0.127029	0.00692774	Pde7b	NA	mRNA	11	URS00009AE511+++URS00009AF91B+++URS00009B3908+++URS00009B70F3+++URS00009B7B3A+++URS00009B9D29+++URS00009C150F+++URS00009C266B+++URS00009C3A9A+++NM_001347366+++NM_013875	coding	known	NC_000076.6	20397052	20725078	-	10|10 A3	29863	NO_INFO	NO_INFO	29863	NA	K18436	Pde7b	NA
252868	252868	Odf4	0	0	0	0.13	0	0	0	0	0	0.17	0	0	0	0	0	2	0	0	0.0433333	0	0.0566667	0	0.666667	0	1.80281	0.952797	0.655556	Odf4	Oppo1	mRNA	1	NM_145746	coding	known	NC_000077.6	68921835	68927081	-	11|11 B3	252868	NO_INFO	NO_INFO	252868	NA	NO_INFO	NA	NA
15378	15378	Hnf4a	146.7	171.2	175.54	195	168.24	160.87	159.76	207.46	231.75	254.48	208.24	201.73	9312	12750	13532	14838	12435	12195	174.703	164.48	221.483	199.657	13156	11864.7	0.151596	0.746222	0.255544	Hnf4a	HNF-4+++Hnf4+++Hnf4alpha+++MODY1+++Nr2a1+++TCF-14+++Tcf14	mRNA	6	URS00009B880F+++NM_001312906+++NM_001312907+++NM_008261+++XM_006498787+++XM_006498788	coding	known	NC_000068.7	163506811	163572907	+	2 H3|2 84.32 cM	15378	NO_INFO	NO_INFO	15378	NA	K07292	NA	NA
72739	72739	Zkscan3	17.24	10.85	7.65	7.09	6.79	7.34	18.78	13.15	10.1	9.25	8.41	9.2	569	447	325	299	278	304	7.07333	11.9133	8.95333	14.01	293.667	447	-0.662529	0.198245	0.014286	Zkscan3	2810435N07Rik+++AA408594+++AI132359+++Skz1+++Zf47+++Zfp-47+++Zfp306+++Zfp307+++mszf35	mRNA	6	NM_001145778+++NM_001368182+++NM_023685+++XM_006516789+++XM_006516790+++XM_006516792	coding	known	NC_000079.6	21387004	21402755	-	13|13 A3.1	72739	NO_INFO	NO_INFO	72739	NA	NO_INFO	NA	NA
24063	24063	Spry1	1.88	1.82	2.41	1.93	1.32	1.82	2.05	2.2	3.19	2.51	1.63	2.28	60	73	100	78	52	74	1.69	2.03667	2.14	2.48	68	77.6667	-0.190693	0.908075	0.498971	Spry1	sprouty1+++spry-1	mRNA	7	URS00009B475B+++URS00009BA629+++NM_001305440+++NM_001305441+++NM_001305442+++NM_011896+++XM_030252610	coding	known	NC_000069.6	37638579	37647952	+	3|3 B	24063	NO_INFO	NO_INFO	24063	NA	NO_INFO	NA	NA
18120	18120	Mrpl49	20.1	18.22	19.21	18.82	18.15	20.5	21.89	22.08	25.36	24.56	22.46	25.7	462	485	529	511	478	554	19.1567	19.1767	24.24	23.11	514.333	492	0.0501681	0.952797	0.759474	Mrpl49	L49mt+++MRP-L49+++Nof1	mRNA	1	NM_026246	coding	known	NC_000085.6	6053630	6057755	-	19 A|19 4.34 cM	18120	NO_INFO	NO_INFO	18120	NA	NO_INFO	Mrpl49	NA
18792	18792	Plau	0.84	0.84	0.8	0.55	0.51	0.34	0.92	1.02	1.05	0.72	0.63	0.42	26	31	30	20	19	13	0.466667	0.826667	0.59	0.996667	17.3333	29	-0.750765	0.477895	0.0763743	Plau	u-PA+++uPA	mRNA	2	NM_008873+++XM_017315919	coding	known	NC_000080.6	20836662	20843388	+	14 A3|14 11.53 cM	18792	NO_INFO	NO_INFO	18792	NA	K01348	Plau	NA
268822	268822	Adck5	18.71	14.48	10.63	15.04	17.81	14.31	20.38	17.54	14.03	19.62	22.05	17.94	520	466	354	494	568	468	15.72	14.6067	19.87	17.3167	510	446.667	0.151164	0.920778	0.525936	Adck5	A230108P17	mRNA	5	NR_073123+++URS00009B1671+++URS00009B185E+++URS00009B3BD8+++NM_172960	coding	known	NC_000081.6	76576359	76595812	+	15|15 D3	268822	NO_INFO	NO_INFO	268822	NA	NO_INFO	NA	NA
29875	29875	Iqgap1	1.09	1.67	1.95	1.61	1.66	1.12	1.19	2.03	2.58	2.11	2.05	1.4	120	213	259	210	211	145	1.46333	1.57	1.85333	1.93333	188.667	197.333	-0.0404475	0.973161	0.871296	Iqgap1	AA682088+++D7Ertd237e+++D7Ertd257e+++mKIAA0051	mRNA	8	URS00009B27F6+++URS00009B3BA2+++URS00009B4AAC+++URS00009C60B4+++XR_001785567+++XR_391347+++NM_016721+++XM_006540950	coding	known	NC_000073.6	80711583	80815549	+	7 D3|7 45.68 cM	29875	NO_INFO	NO_INFO	29875	NA	K16848	Iqgap1	NA
106073	106073	Mfsd5	12.66	12.04	8.98	10.09	8.41	9.37	13.78	14.59	11.86	13.17	10.41	11.75	294	324	250	277	224	256	9.29	11.2267	11.7767	13.41	252.333	289.333	-0.221926	0.770388	0.283503	Mfsd5	AA409375+++AW556797+++D15Mgi27	mRNA	1	NM_134100	coding	known	NC_000081.6	102279456	102281744	+	15|15 F2	106073	NO_INFO	NO_INFO	106073	NA	NO_INFO	NA	NA
192187	192187	Stab1	5.9	5.2	6.46	5.35	5.62	5.44	6.43	6.3	8.52	6.98	6.95	6.82	711	727	934	764	780	774	5.47	5.85333	6.91667	7.08333	772.667	790.667	-0.0422298	0.952797	0.794713	Stab1	FEEL-1+++FELE-1+++MFEEL-1+++MS-1+++STAB-1+++mKIAA0246	mRNA	2	XR_001781097+++NM_138672	coding	known	NC_000080.6	31139017	31168651	-	14|14 B	192187	NO_INFO	NO_INFO	192187	NA	NO_INFO	Stab1	NA
100045792	100045792	Ect2l	0	0	0.03	0	0.02	0.02	0	0	0.04	0	0.02	0.02	0	0	2	0	1	1	0.0133333	0.01	0.0133333	0.0133333	0.666667	0.666667	0.0882391	0.999812	0.972884	Ect2l	C330021H03Rik+++Gm10331	mRNA	6	URS00009B3FF3+++URS00009BF987+++URS00009C05F9+++URS00009C3ABE+++NM_001195036+++NM_001370991	coding	known	NC_000076.6	18128375	18212112	-	10|10 A3	100045792	NO_INFO	NO_INFO	100045792	NA	NO_INFO	NA	NA
170460	170460	Stard5	20.26	25.46	29.78	30.66	35.8	28.73	22.07	30.86	39.31	40.01	44.31	36.03	686	999	1209	1228	1392	1146	31.73	25.1667	40.1167	30.7467	1255.33	964.667	0.395832	0.270102	0.023635	Stard5	2310058G22Rik+++AI607880+++D7Ertd152e	mRNA	2	URS00009BDE54+++NM_023377	coding	known	NC_000073.6	83632017	83642328	+	7 D3|7 47.43 cM	170460	NO_INFO	NO_INFO	170460	NA	NO_INFO	Stard5	NA
108167320	108167320	LOC108167320	4.96	3.9	2.75	2.09	1.36	0.51	5.4	4.72	3.64	2.73	1.68	0.64	29.48	26.65	19.47	14.46	9.04	3.5	1.32	3.87	1.68333	4.58667	9	25.2	-1.55316	0.138986	0.00806546	LOC108167320	NA	mRNA	1	XM_011249870	coding	known	NC_000075.6	124441680	124442903	-	NO_INFO	108167320	NO_INFO	NO_INFO	108167320	NA	NO_INFO
66404	66404	Rtf2	48.08	41.88	42.82	48.81	51.97	46.59	52.36	50.75	56.53	63.69	64.33	58.43	1416	1429	1512	1700	1757	1616	49.1233	44.26	62.15	53.2133	1691	1452.33	0.200805	0.684142	0.196481	Rtf2	1700067C04Rik+++2410001C21Rik+++5730427M17Rik+++AA589417+++Rtfdc1	mRNA	2	URS00009BB039+++NM_025542	coding	known	NC_000068.7	172440578	172469899	+	2|2 H3	66404	NO_INFO	NO_INFO	66404	NA	NO_INFO	NA	NA
66664	66664	Tmem41a	4.11	7.05	7.06	7.51	5.87	7.25	4.48	8.55	9.32	9.8	7.27	9.09	71	141	146	153	116	147	6.87667	6.07333	8.72	7.45	138.667	119.333	0.238321	0.813748	0.336854	Tmem41a	2900010K02Rik+++5730578N08Rik	mRNA	2	NR_037773+++NM_025693	coding	known	NC_000082.6	21934327	21947552	-	16|16 B1	66664	NO_INFO	NO_INFO	66664	NA	NO_INFO	Tmem41a	NA
268973	268973	Nlrc4	0.11	0.2	0.04	0.1	0.11	0.04	0.12	0.24	0.06	0.14	0.13	0.05	6	13	3	7	7	3	0.0833333	0.116667	0.106667	0.14	5.66667	7.33333	-0.372228	0.952797	0.654914	Nlrc4	9530011P19Rik+++CLAN+++CLAN1+++CLANA+++CLANB+++CLANC+++CLAND+++Card12+++IPAF	mRNA	5	NM_001033367+++XM_006524346+++XM_006524347+++XM_017317490+++XM_017317491	coding	known	NC_000083.6	74426255	74459144	-	17|17 E2	268973	NO_INFO	NO_INFO	268973	NA	K12805	NA	NA
234258	234258	Neil3	0	0.06	0.03	0	0.06	0.05	0	0.07	0.04	0	0.07	0.07	0	2	1	0	2	2	0.0366667	0.03	0.0466667	0.0366667	1.33333	1	0.500494	0.952797	0.793545	Neil3	AI449477+++BC034753+++C85903	mRNA	2	XR_870387+++NM_146208	coding	known	NC_000074.6	53586867	53639065	-	8|8 B1.3	234258	NO_INFO	NO_INFO	234258	NA	K10569	NA	NA
67869	67869	Paip2	48.6	50.09	49.03	51.05	55.41	57.47	52.93	60.7	64.73	66.63	68.58	72.06	934	1113	1125	1158	1220	1294	54.6433	49.24	69.09	59.4533	1224	1057.33	0.205131	0.61997	0.146446	Paip2	2310050K10Rik+++AU045972	mRNA	12	URS00009B9395+++URS00009C23ED+++NM_001357470+++NM_001357471+++NM_001357472+++NM_001357473+++NM_026420+++XM_017317972+++XM_017317973+++XM_030250579+++XM_030250580+++XM_030250581	coding	known	NC_000084.6	35598610	35617186	+	18|18 B2	67869	NO_INFO	NO_INFO	67869	NA	NO_INFO	Paip2	NA
73218	73218	Sppl2b	7.45	6.66	6.02	6.53	5.68	6.34	8.11	8.07	7.95	8.53	7.03	7.95	284	307	287	307	263	300	6.18333	6.71	7.83667	8.04333	290	292.667	-0.0311236	0.971358	0.863253	Sppl2b	3110056O03Rik+++AW550292+++PSL1	mRNA	22	URS00009B1BD8+++XR_003948809+++XR_003948810+++XR_380447+++NM_001358803+++NM_001358804+++NM_175195+++XM_006514209+++XM_006514210+++XM_006514211+++XM_006514212+++XM_006514213+++XM_006514215+++XM_011243585+++XM_017314119+++XM_017314120+++XM_030245309+++XM_030245310+++XM_030245311+++XM_030245312+++XM_030245313+++XM_030245314	coding	known	NC_000076.6	80855242	80868708	+	10|10 C1	73218	NO_INFO	NO_INFO	73218	NA	NO_INFO	NA	NA
18171	18171	Nr1i2	38.17	48.87	47.53	56.73	54.35	53.15	41.57	59.22	62.75	74.04	67.27	66.65	1309	1770	1762	2147	2026	2025	54.7433	44.8567	69.32	54.5133	2066	1613.67	0.35755	0.0815585	0.00359123	Nr1i2	PXR+++PXR.1+++PXR.2+++PXR1+++SXR+++mPXR	mRNA	8	XR_384533+++NM_001098404+++NM_010936+++XM_006521846+++XM_006521847+++XM_006521848+++XM_011245839+++XM_011245840	coding	known	NC_000082.6	38248349	38294849	-	16|16 B3	18171	NO_INFO	NO_INFO	18171	NA	NO_INFO	NA	NA
12419	12419	Cbx5	3.82	3.01	3.52	2.36	3.19	3.02	4.16	3.65	4.65	3.08	3.95	3.78	217	241	244	197	215	238	2.85667	3.45	3.60333	4.15333	216.667	234	-0.120807	0.920485	0.525198	Cbx5	2610029O15Rik+++C75991+++HP1+++Hp1a+++Hp1alpha	mRNA	18	URS00009AE819+++URS00009AFCD6+++URS00009B1098+++URS00009B480E+++URS00009B810F+++URS00009BD469+++URS00009C1F6F+++URS00009C4F6B+++NM_001076789+++NM_001110216+++NM_001358950+++NM_007626+++XM_006520372+++XM_006520374+++XM_006520375+++XM_006520376+++XM_006520377+++XM_030248308	coding	known	NC_000081.6	103191096	103239904	-	15|15 F3	12419	NO_INFO	NO_INFO	12419	NA	NO_INFO	NA	NA
338348	338348	Ttc16	0.03	0.09	0.07	0.05	0.05	0.05	0.03	0.11	0.09	0.06	0.06	0.06	1	4	3	2	2	2	0.05	0.0633333	0.06	0.0766667	2	2.66667	-0.37775	0.952797	0.761766	Ttc16	1200002K10Rik	mRNA	6	NM_001290563+++NM_001290564+++NM_001290566+++NM_001290567+++NM_177384+++XM_006498139	coding	known	NC_000068.7	32757026	32775784	-	2|2 B	338348	NO_INFO	NO_INFO	338348	NA	NO_INFO	Ttc16	NA
72320	72320	Kif1bp	6.24	7.37	7.36	5.7	5.99	5.83	6.79	8.93	9.71	7.43	7.41	7.32	219	298	308	238	241	241	5.84	6.99	7.38667	8.47667	240	275	-0.193227	0.742588	0.251904	Kif1bp	0710007C18Rik+++2510003E04Rik+++KBP+++Kif1bp+++mKIAA1279	mRNA	6	URS0000811AD2+++URS00009B907A+++URS00009BDAE6+++URS00009BF90A+++NM_028197+++XM_006514192	coding	known	NC_000076.6	62558470	62579069	+	10|10 B4	72320	NO_INFO	NO_INFO	72320	NA	NO_INFO	NA	NA
75396	75396	Spp2	87.16	85.06	84.53	70.77	90.53	77.3	94.92	103.07	111.6	92.35	112.05	96.93	730	658	716	604	748	616	79.5333	85.5833	100.443	103.197	656	701.333	-0.120688	0.925791	0.539858	Spp2	0610038O04Rik+++pp-24+++spp24	mRNA	2	NM_029269+++XM_006529918	coding	known	NC_000067.6	88406966	88428300	+	1|1 D	75396	NO_INFO	NO_INFO	75396	NA	NO_INFO	NA	NA
212167	212167	Gsap	2.96	3.25	3.82	3.04	3.38	3.4	3.23	3.94	5.05	3.97	4.19	4.27	168.92	212.99	262	204.01	223.12	230	3.27333	3.34333	4.14333	4.07333	219.043	214.637	0.0386929	0.962946	0.840868	Gsap	A530088I07Rik+++Pion	mRNA	15	NR_153365+++NR_153366+++URS00009B8C19+++XR_001784656+++XR_001784657+++XR_001784658+++NM_001359876+++NM_001359877+++NM_175437+++XM_006535668+++XM_006535669+++XM_006535670+++XM_011249760+++XM_030254346+++XM_030254347	coding	known	NC_000071.6	21176019	21291737	+	5|5 A3	212167	NO_INFO	NO_INFO	212167	NA	NO_INFO	Gsap	NA
66254	66254	Dimt1	2.06	1.42	1.34	0.95	0.97	1.28	2.25	1.72	1.77	1.23	1.21	1.6	75	60	58	41	40	57	1.06667	1.60667	1.34667	1.91333	46	64.3333	-0.518611	0.568337	0.119095	Dimt1	1500031M22Rik+++AV111347+++Dimt1l	mRNA	3	XR_003950461+++NM_025447+++XM_006517735	coding	known	NC_000079.6	106947071	106961325	+	13|13 D2.1	66254	NO_INFO	NO_INFO	66254	NA	NO_INFO	NA	COG0030///NA
22678	22678	Zfp2	1.22	1.16	1.42	1.05	1.01	1.16	1.33	1.41	1.87	1.37	1.25	1.45	70	65	80	61	62	74	1.07333	1.26667	1.35667	1.53667	65.6667	71.6667	-0.140485	0.952069	0.610732	Zfp2	9930007F06Rik+++Fnp-2+++Zfp-2+++mKR2+++mkr-2+++mszf87	mRNA	17	URS00009AF675+++URS00009BDDDF+++NM_001044697+++NM_001044698+++NM_001044700+++NM_001294323+++NM_178447+++XM_017314506+++XM_017314507+++XM_017314508+++XM_030245935+++XM_030245936+++XM_030245937+++XM_030245938+++XM_030245939+++XM_030245940+++XM_030245941	coding	known	NC_000077.6	50897265	50918145	+	11 B1.3|11 30.94 cM	22678	NO_INFO	NO_INFO	22678	NA	NO_INFO	Zfp2	NA
53621	53621	Cnot4	3.13	4.27	3.6	3.5	3.02	3.59	3.41	5.17	4.75	4.57	3.73	4.51	167	259	227	219	180	224	3.37	3.66667	4.27	4.44333	207.667	217.667	-0.0633068	0.952797	0.739467	Cnot4	Not4+++Not4h+++Not4hp	mRNA	20	URS00009ADACE+++URS00009B0DF0+++URS00009B14D4+++URS00009B1818+++URS00009B24A6+++URS00009B8BA2+++URS00009BBE0D+++URS00009BF70E+++URS00009C0421+++XR_001785150+++XR_001785151+++XR_001785152+++XR_001785153+++NM_001164411+++NM_001164412+++NM_001164413+++NM_001164414+++NM_016877+++XM_011241407+++XM_011241408	coding	known	NC_000072.6	35022065	35133754	-	6|6 B1	53621	NO_INFO	NO_INFO	53621	NA	K10643	NA	NA
15903	15903	Id3	59.11	39.95	35.19	60.57	49.74	36.33	64.38	48.41	46.45	79.05	61.57	45.55	648	506	461	780	620	465	48.88	44.75	62.0567	53.08	621.667	538.333	0.155096	0.931801	0.54961	Id3	Hlh462+++Idb3+++bHLHb25	mRNA	2	URS00009C2F09+++NM_008321	coding	known	NC_000070.6	136143822	136147320	+	4 D3|4 68.34 cM	15903	NO_INFO	NO_INFO	15903	NA	K17694	Id3	NA
72776	72776	Sass6	0.36	0.33	0.48	0.24	0.33	0.19	0.39	0.4	0.63	0.32	0.41	0.24	22	24	36	18	24	14	0.253333	0.39	0.323333	0.473333	18.6667	27.3333	-0.546966	0.704093	0.216184	Sass6	2810453L12Rik	mRNA	6	URS000081198D+++NM_001289568+++NM_001289571+++NM_028349+++XM_006502140+++XM_006502141	coding	known	NC_000069.6	116594938	116630986	+	3|3 G1	72776	NO_INFO	NO_INFO	72776	NA	NO_INFO	NA	NA
243771	243771	Parp12	3.04	6.85	7.52	5.92	5.42	5.1	3.31	8.3	9.92	7.72	6.71	6.4	141	368	418	325	289	279	5.48	5.80333	6.94333	7.17667	297.667	309	-0.009095	0.999812	0.973418	Parp12	9930021O16+++AA409132+++AA536654+++ARTD12+++PARP-12+++Zc3hdc1	mRNA	1	NM_172893	coding	known	NC_000072.6	39086412	39118349	-	6|6 B1	243771	NO_INFO	NO_INFO	243771	NA	NO_INFO	NA	NA
67205	67205	Utp11	24.25	23.43	19	17.38	16.02	14.37	26.41	28.39	25.08	22.68	19.82	18.01	277	308	256	233	206	191	15.9233	22.2267	20.17	26.6267	210	280.333	-0.437221	0.291646	0.0277448	Utp11	2700082D03Rik+++CGI-94+++Cgi94+++Utp11l	mRNA	3	XR_003954997+++NM_026031+++XM_011240592	coding	known	NC_000070.6	124678232	124693610	-	4|4 D2.2	67205	NO_INFO	NO_INFO	67205	NA	NO_INFO	Utp11	NA
242050	242050	Igsf10	0.11	0.12	0.09	0.11	0.11	0.11	0.12	0.14	0.12	0.14	0.14	0.14	17	18	14	17	18	18	0.11	0.106667	0.14	0.126667	17.6667	16.3333	0.0959848	0.962946	0.84138	Igsf10	6530405F15Rik+++9030224D03+++AA409708+++AA536958+++AI414626+++Adlican2+++CMF608	mRNA	13	URS0000811E39+++URS00009B3DDD+++URS00009B4653+++URS00009BBF7C+++URS00009C204E+++NM_001162884+++XM_006501465+++XM_006501466+++XM_006501467+++XM_006501468+++XM_011240117+++XM_030252615+++XM_030252616	coding	known	NC_000069.6	59316735	59351240	+	3|3 D	242050	NO_INFO	NO_INFO	242050	NA	NO_INFO	NA	NA
18196	18196	Nsg1	0.12	0.26	0.45	0.23	0.18	0.25	0.13	0.31	0.59	0.29	0.22	0.32	4	10	18	9	7	10	0.22	0.276667	0.276667	0.343333	8.66667	10.6667	-0.260536	0.952797	0.701929	Nsg1	Neep21+++m234+++p21	mRNA	4	NM_001359090+++NM_001359091+++NM_001359092+++NM_010942	coding	known	NC_000071.6	38137193	38159743	-	5 B3|5 20.21 cM	18196	NO_INFO	NO_INFO	18196	NA	NO_INFO	Nsg1	NA
231712	231712	Trafd1	10.73	19.77	17.39	14.34	15.75	14.91	11.69	23.96	22.95	18.71	19.5	18.7	376	800	733	596	635	618	15	15.9633	18.97	19.5333	616.333	636.333	-0.0150054	0.996594	0.941403	Trafd1	1110008K06Rik+++Fln29	mRNA	12	NM_001163470+++NM_001359947+++NM_172275+++XM_006530302+++XM_011248197+++XM_017320864+++XM_017320865+++XM_017320867+++XM_030254426+++XM_030254427+++XM_030254428+++XM_030254429	coding	known	NC_000071.6	121371725	121386570	-	5|5 F	231712	NO_INFO	NO_INFO	231712	NA	NO_INFO	Trafd1	NA
68260	68260	Trmt12	0.93	1.08	0.72	0.47	0.56	0.43	1.01	1.31	0.95	0.62	0.69	0.55	56	76	52	34	39	31	0.486667	0.91	0.62	1.09	34.6667	61.3333	-0.830823	0.161297	0.0102038	Trmt12	4632406N01Rik+++AI449275+++Tyw2	mRNA	1	NM_026642	coding	known	NC_000081.6	58872649	58876781	+	15|15 D1	68260	NO_INFO	NO_INFO	68260	NA	NO_INFO	NA	COG2520///NA
215384	215384	Fcgbp	0.01	0.03	0.03	0.02	0.01	0.03	0.01	0.03	0.05	0.03	0.01	0.04	1	4	5	3	1	4	0.02	0.0233333	0.0266667	0.03	2.66667	3.33333	-0.281565	0.952797	0.807321	Fcgbp	A430096B05Rik	mRNA	1	NM_001122603	coding	known	NC_000073.6	28071236	28120864	+	7|7 A3	215384	NO_INFO	NO_INFO	215384	NA	NO_INFO	Fcgbp	NA
12269	12269	C4bp	390.48	344.62	333.6	269.32	278.22	285.55	425.26	417.61	440.42	351.46	344.37	358.08	6957	8478	8896	7377	7186	7731	277.697	356.233	351.303	427.763	7431.33	8110.33	-0.130362	0.771609	0.286043	C4bp	AI195242+++C4bpa	mRNA	4	NM_007576+++XM_011247906+++XM_017312492+++rna-NM_007576.3-2	coding	known	NT_187021.1	308901	130661657	-	1 E4|1 56.89 cM	12269	NO_INFO	NO_INFO	12269	NA	K04002	NA	NA
99371	99371	Arfgef2	4.15	4.87	6.11	6.25	4.43	3.87	4.52	5.9	8.07	8.15	5.49	4.85	550	749	975	984	678	606	4.85	5.04333	6.16333	6.16333	756	758	0.00213669	0.999812	0.991963	Arfgef2	AI463430+++AW493672+++BIG2+++E230011G24Rik	mRNA	6	URS00009B9BE7+++URS00009BEFD7+++NM_001085495+++XM_006500483+++XM_006500484+++XM_030252278	coding	known	NC_000068.7	166805451	166898052	+	2|2 H3	99371	NO_INFO	NO_INFO	99371	NA	K18442	NA	NA
231668	231668	Vsig10	0.25	0.2	0.11	0.13	0.18	0.13	0.28	0.25	0.15	0.17	0.22	0.16	15	14	8	9	12	9	0.146667	0.186667	0.183333	0.226667	10	12.3333	-0.334726	0.943654	0.5826	Vsig10	NA	mRNA	6	URS00008C41DF+++URS00009BC4B1+++URS00009C2F2D+++URS0000AAC92E+++XR_001784682+++NM_001033311	coding	known	NC_000071.6	117318476	117355007	+	5|5 F	231668	NO_INFO	NO_INFO	231668	NA	NO_INFO	NA	NA
56794	56794	Hacl1	119.72	81.54	148.99	153.14	199.05	199.27	130.38	98.82	196.7	199.84	246.38	249.89	4412	3483	6586	6680	8430	8657	183.82	116.75	232.037	141.967	7922.33	4827	0.70625	0.0667128	0.00266445	Hacl1	1600020H07Rik+++Hpcl+++Phyh2	mRNA	1	NM_019975	coding	known	NC_000080.6	31607226	31640965	-	14|14 B	56794	NO_INFO	NO_INFO	56794	NA	K12261	NA	NA
18108	18108	Nmt2	4.69	4.52	4.85	5.03	5.08	4.03	5.11	5.47	6.41	6.57	6.29	5.06	307	342	381	390	382	311	4.71333	4.68667	5.97333	5.66333	361	343.333	0.0634302	0.952797	0.717219	Nmt2	A930001K02Rik+++AI605445+++AU044698+++hNMT-2	mRNA	7	URS00009B0004+++URS00009B9138+++URS00009B9BE9+++NM_001290368+++NM_001290369+++NM_001290370+++NM_008708	coding	known	NC_000068.7	3284212	3328877	+	2|2 A1	18108	NO_INFO	NO_INFO	18108	NA	NO_INFO	NA	NA
232970	232970	Phldb3	4.17	3.22	3.3	3.97	3.62	3.98	4.54	3.91	4.35	5.18	4.48	4.99	145	132	144	157	152	167	3.85667	3.56333	4.88333	4.26667	158.667	140.333	0.155199	0.897323	0.479822	Phldb3	EG232970+++Gm10102	mRNA	4	NM_001102613+++XM_017322157+++XM_030242440+++XM_030242441	coding	known	NC_000073.6	24610294	24629297	+	7|7 A3	232970	NO_INFO	NO_INFO	232970	NA	NO_INFO	NA	NA
102640920	102640920	Pvrig	0.43	0.3	0.48	0.12	0.19	0.3	0.46	0.37	0.63	0.15	0.23	0.38	7	15	17	8	13	11	0.203333	0.403333	0.253333	0.486667	10.6667	13	-0.25607	0.952797	0.664319	Pvrig	Gm36869	mRNA	6	URS00009C4F60+++URS00009C4FC5+++XR_003955818+++XM_011240963+++XM_011240966+++XM_011240967	coding	known	NC_000071.6	138335208	138360140	+	5 G2|5	102640920	NO_INFO	NO_INFO	102640920	NA	NO_INFO	NA	NA
19416	19416	Rasd1	0.75	1.34	0.39	0.32	0.49	1.41	0.82	1.63	0.52	0.42	0.61	1.76	16	33	10	8	12	35	0.74	0.826667	0.93	0.99	18.3333	19.6667	-0.0919456	0.977119	0.88549	Rasd1	Dexras1	mRNA	1	NM_009026	coding	known	NC_000077.6	59963181	59964944	-	11|11 B1.3	19416	NO_INFO	NO_INFO	19416	NA	K07843	Rasd1	NA
11785	11785	Apbb1	0.12	0.42	0.38	0.5	0.33	0.57	0.13	0.51	0.5	0.65	0.4	0.72	3	15	14	22	13	23	0.466667	0.306667	0.59	0.38	19.3333	10.6667	0.899188	0.580103	0.125363	Apbb1	Fe65+++Rir	mRNA	13	NM_001253885+++NM_001253886+++NM_001253887+++NM_001310600+++NM_009685+++XM_006507230+++XM_006507231+++XM_006507232+++XM_006507234+++XM_006507235+++XM_006507236+++XM_017321946+++XM_017321947	coding	known	NC_000073.6	105558465	105581924	-	7 E3|7 55.9 cM	11785	NO_INFO	NO_INFO	11785	NA	K04529	NA	NA
404710	404710	Iqgap3	0.04	0.07	0.15	0.19	0.13	0.11	0.04	0.09	0.2	0.25	0.17	0.14	3	7	15	19	13	11	0.143333	0.0866667	0.186667	0.11	14.3333	8.33333	0.814096	0.699779	0.21347	Iqgap3	AI593484+++D030034H08	mRNA	5	URS00009BDB56+++URS00009C180C+++URS00009C329C+++NM_001033484+++XM_006501643	coding	known	NC_000069.6	88082002	88121048	+	3 F1|3 38.78 cM	404710	NO_INFO	NO_INFO	404710	NA	K05767	Iqgap3	NA
52668	52668	Ifi27	50.67	68.1	61.42	72.27	39.3	53.87	55.19	82.52	81.09	94.31	48.65	67.55	577	903	838	990	512	720	55.1467	60.0633	70.17	72.9333	740.667	772.667	-0.0597191	0.952797	0.786879	Ifi27	1110013J02Rik+++2900026P10Rik+++D12Ertd647e+++ISG12a+++Ifi27l1	mRNA	8	NM_001364173+++NM_001364174+++NM_026790+++NM_194066+++NM_194067+++NM_194068+++NM_194069+++XM_006516077	coding	known	NC_000078.6	103434189	103440245	+	12 E|12 52.93 cM	52668	NO_INFO	NO_INFO	52668	NA	NO_INFO	Ifi27	NA
76252	76252	Atp6v0e2	0.28	0.42	0.24	0.24	0.18	0.28	0.31	0.51	0.31	0.31	0.23	0.35	7	12	7	7	5	8	0.233333	0.313333	0.296667	0.376667	6.66667	8.66667	-0.378832	0.946557	0.591121	Atp6v0e2	0610006O14Rik+++NM9.2	mRNA	2	NM_001347164+++NM_133764	coding	known	NC_000072.6	48537569	48541801	+	6|6 B2.3	76252	NO_INFO	NO_INFO	76252	NA	K02153	Atp6v0e2	NA
18126	18126	Nos2	0.02	0.07	0.02	0	0.03	0.02	0.02	0.09	0.02	0	0.04	0.02	1	5	1	0	2	1	0.0166667	0.0366667	0.02	0.0433333	1	2.33333	-1.16701	0.894754	0.474761	Nos2	MAC-NOS+++NOS-II+++Nos-2+++Nos2a+++i-NOS+++iNOS	mRNA	4	URS00000C6568+++NM_001313921+++NM_001313922+++NM_010927	coding	known	NC_000077.6	78920787	78960226	+	11 B5|11 46.74 cM	18126	NO_INFO	NO_INFO	18126	NA	K13241	Nos2	NA
14266	14266	Aff2	0.01	0	0.04	0.01	0.01	0.01	0.01	0	0.05	0.01	0.01	0.02	1	0	3	1	1	2	0.01	0.0166667	0.0133333	0.02	1.33333	1.33333	0.00588943	0.999812	0.997245	Aff2	FMR2P+++Fmr2+++Ox19+++Oxh	mRNA	17	URS0000768661+++URS0000778372+++URS00009B05D6+++URS00009B15FF+++URS00009B8C3A+++URS00009C1817+++URS00009C2E4A+++URS00009C3F8B+++URS00009C58A4+++NM_008032+++XM_006527816+++XM_006527817+++XM_006527818+++XM_006527819+++XM_006527820+++XM_006527821+++XM_030251226	coding	known	NC_000086.7	69356596	69872054	+	X|X A7.1- A7.2	14266	NO_INFO	NO_INFO	14266	NA	NO_INFO	NA	NA
56857	56857	Slc37a2	0.22	0.44	0.38	0.37	0.41	0.33	0.24	0.54	0.5	0.48	0.5	0.41	14	33	29	28	30	25	0.37	0.346667	0.463333	0.426667	27.6667	25.3333	0.151239	0.952797	0.712362	Slc37a2	G3PP+++Slc37a1+++cI-2+++ci2	mRNA	4	URS00009C4975+++URS0000AA0541+++NM_001145960+++NM_020258	coding	known	NC_000075.6	37229149	37256149	+	9|9 A4	56857	NO_INFO	NO_INFO	56857	NA	NO_INFO	NA	NA
414801	414801	Itprip	0.49	0.73	0.5	0.34	0.61	0.49	0.53	0.89	0.66	0.44	0.76	0.62	27	47	33	22	39	32	0.48	0.573333	0.606667	0.693333	31	35.6667	-0.189894	0.952797	0.624274	Itprip	4833424O12Rik+++DANGER	mRNA	4	URS00009BE9C0+++NM_001001738+++NM_001362458+++NM_001362459	coding	known	NC_000085.6	47894590	47919323	-	19|19 D1	414801	NO_INFO	NO_INFO	414801	NA	NO_INFO	NA	NA
66170	66170	Chchd5	22.37	24.5	19.4	15.15	19.52	17.67	24.36	29.68	25.61	19.77	24.17	22.16	367	465	381	293	366	340	17.4467	22.09	22.0333	26.55	333	404.333	-0.286624	0.579871	0.125144	Chchd5	1110027L01Rik+++AW045710	mRNA	1	NM_025395	coding	known	NC_000068.7	129129700	129134112	+	2|2 F1	66170	NO_INFO	NO_INFO	66170	NA	NO_INFO	NA	NA
72552	72552	Hsdl1	1.28	1.75	1.52	1.73	1.36	1.54	1.39	2.12	2.01	2.26	1.68	1.93	58	92	83	93	71	83	1.54333	1.51667	1.95667	1.84	82.3333	77.6667	0.0886197	0.952797	0.72552	Hsdl1	2700067E09Rik	mRNA	12	URS00009B1A60+++URS00009B69B9+++XR_001778478+++XR_003947344+++XR_003947345+++NM_175185+++XM_006531393+++XM_006531394+++XM_006531395+++XM_006531397+++XM_006531398+++XM_030243789	coding	known	NC_000074.6	119559720	119575215	-	8|8 E1	72552	NO_INFO	NO_INFO	72552	NA	NO_INFO	Hsdl1	NA
218397	218397	Rasa1	3.2	2.65	3.19	3.08	3.11	3.2	3.48	3.21	4.21	4.02	3.85	4.01	241	231	289	275	269	284	3.13	3.01333	3.96	3.63333	276	253.667	0.107493	0.938832	0.568257	Rasa1	Gap+++RasGAP+++Rasa	mRNA	4	URS00009AFE83+++URS00009BE693+++NM_145452+++XM_011244518	coding	known	NC_000079.6	85214699	85289486	-	13 C3|13 45.05 cM	218397	NO_INFO	NO_INFO	218397	NA	K04352	NA	NA
100042480	100042480	Nhsl2	0.56	0.35	0.33	0.3	0.35	0.35	0.61	0.43	0.44	0.4	0.43	0.44	150.82	109.18	104.2	96.54	106.46	110.83	0.333333	0.413333	0.423333	0.493333	104.61	121.4	-0.263412	0.832597	0.35889	Nhsl2	1110062M06Rik+++6430511F03+++AI225852+++AW488865+++EG621083+++Gm10456	mRNA	22	URS00009AEC36+++URS00009B1725+++URS00009B2CFB+++NM_001163610+++XM_006527718+++XM_006527720+++XM_006527721+++XM_006527723+++XM_006527724+++XM_006527725+++XM_006527726+++XM_006527727+++XM_006527728+++XM_006527729+++XM_011247499+++XM_011247501+++XM_011247502+++XM_030251161+++XM_030251162+++XM_030251163+++XM_030251164+++XM_030251165	coding	known	NC_000086.7	101849261	102092055	+	X|X D	100042480	NO_INFO	NO_INFO	100042480	NA	NO_INFO	Nhsl2	NA
17837	17837	Mug2	146.66	188.69	217.31	5.45	8.43	97.19	159.73	228.65	286.9	7.12	10.44	121.87	9886.63	14918.9	17803.7	445.27	669.18	7791.51	37.0233	184.22	46.4767	225.093	2968.65	14203.1	-2.23045	0.424575	0.0586829	Mug2	Cpamd8	mRNA	5	NM_008646+++XM_006505699+++XM_006505700+++XM_006505701+++XM_006505702	coding	known	NC_000072.6	122006729	122085968	+	6|6 F1	17837	NO_INFO	NO_INFO	17837	NA	NO_INFO	NA	NA
73463	73463	C2cd6	0	0	0	0.01	0	0.04	0	0	0	0.02	0	0.05	0	0	0	1	0	1	0.0166667	0	0.0233333	0	0.666667	0	1.83041	0.94991	0.607943	C2cd6	1700052H20Rik+++4930408G06Rik+++Als2cr11+++Als2cr11b+++C2cd6b+++Gm33589	mRNA	10	URS0000A8FDB4+++NM_026600+++NM_175200+++XM_011238605+++XM_011238634+++XM_011238635+++XM_011238636+++XM_017312469+++XM_017313438+++XM_030243180	coding	known	NC_000067.6	58997116	59095023	-	1|1 C1.3	73463	NO_INFO	NO_INFO	73463	NA	NO_INFO	NA	NA
56454	56454	Aldh18a1	0.22	0.36	0.34	0.47	0.36	0.28	0.24	0.43	0.45	0.61	0.44	0.35	8	18	21	25	21	12	0.37	0.306667	0.466667	0.373333	19.3333	15.6667	0.326898	0.921074	0.528582	Aldh18a1	2810433K04Rik+++AI429789+++Pycs	mRNA	3	NM_019698+++NM_153554+++XM_030251003	coding	known	NC_000085.6	40550257	40588463	-	19|19 C3	56454	NO_INFO	NO_INFO	56454	NA	K12657	NA	NA
270685	270685	Mthfd1l	0.22	0.3	0.34	0.93	0.39	0.39	0.24	0.37	0.45	1.22	0.48	0.49	12	17	22	60	24	25	0.57	0.286667	0.73	0.353333	36.3333	17	1.09251	0.263862	0.0226144	Mthfd1l	2410004L15Rik+++AI647056+++Fthfsdc1	mRNA	6	URS00009B178E+++URS00009B3F1A+++NM_001170785+++NM_001170786+++NM_172308+++XM_006512449	coding	known	NC_000076.6	3972892	4167081	+	10|10 A1	270685	NO_INFO	NO_INFO	270685	NA	K13402	NA	NA
217149	217149	Cisd3	130.38	61.67	56.28	62.17	73.96	68.68	141.99	74.73	74.3	81.13	91.54	86.13	1040	568	536	581	667	637	68.27	82.7767	86.2667	97.0067	628.333	714.667	-0.263785	0.852138	0.392977	Cisd3	Mel-13+++Mel13	mRNA	3	NM_001085500+++NM_001364153+++XM_006533029	coding	known	NC_000077.6	97685465	97688625	+	11|11 D	217149	NO_INFO	NO_INFO	217149	NA	NO_INFO	NA	NA
15983	15983	Ifrd2	19.16	24.71	24.07	24.53	18.9	18.17	20.87	29.95	31.77	32.01	23.39	22.78	516	771	777	781	584	576	20.5333	22.6467	26.06	27.53	647	688	-0.0838321	0.952797	0.622156	Ifrd2	1810034A24Rik+++AA470234+++AI838527+++SKMc15	mRNA	1	NM_025903	coding	known	NC_000075.6	107587718	107593038	+	9 F1|9 58.24 cM	15983	NO_INFO	NO_INFO	15983	NA	NO_INFO	NA	NA
21749	21749	Terf1	3.61	3.49	3.72	3.15	2.06	3.79	3.93	4.23	4.91	4.11	2.55	4.75	111	107	125	110	67	110	3	3.60667	3.80333	4.35667	95.6667	114.333	-0.27761	0.779472	0.295614	Terf1	Pin2+++Trbf1+++Trf1	mRNA	4	NR_152944+++NM_001286628+++NM_009352+++XM_030252966	coding	known	NC_000067.6	15805546	15844052	+	1 A3|1 4.88 cM	21749	NO_INFO	NO_INFO	21749	NA	NO_INFO	Terf1	NA
381476	381476	Stpg2	0	0.09	0	0	0.06	0	0	0.11	0	0	0.07	0	0	3	0	0	2	0	0.02	0.03	0.0233333	0.0366667	0.666667	1	-0.467467	0.970562	0.861619	Stpg2	B930007M17Rik+++Gm1017	mRNA	2	NM_198659+++XM_006501628	coding	known	NC_000069.6	139205625	139710299	+	3|3 H1	381476	NO_INFO	NO_INFO	381476	NA	NO_INFO	NA	NA
76563	76563	Qrsl1	1.27	1.9	1.43	1.04	1.37	1.46	1.38	2.3	1.89	1.36	1.69	1.83	34	59	46	33	42	46	1.29	1.53333	1.62667	1.85667	40.3333	46.3333	-0.188667	0.939356	0.570138	Qrsl1	2700038P16Rik+++C80053+++GatA	mRNA	2	XR_380090+++NM_001081054	coding	known	NC_000076.6	43874188	43901742	-	10|10 B2	76563	NO_INFO	NO_INFO	76563	NA	K02433	NA	COG0154///NA
670558	670558	H60c	0.03	0	0	0	0	0	0.03	0	0	0	0	0	1	0	0	0	0	0	0	0.01	0	0.01	0	0.333333	-0.973727	0.952797	0.811392	H60c	4632413I24Rik+++Gm9491	mRNA	4	NM_001204916+++XM_006512485+++XM_030245225+++XM_030245226	coding	known	NC_000076.6	3256202	3268091	-	10 A1|10	670558	NO_INFO	NO_INFO	670558	NA	NO_INFO	NA	NA
69582	69582	Plekhm2	2.96	3.93	3.95	3.91	3.54	2.77	3.22	4.76	5.21	5.1	4.39	3.47	178	277	287	280	247	197	3.40667	3.61333	4.32	4.39667	241.333	247.333	-0.0260417	0.980502	0.896868	Plekhm2	2310034J19Rik+++AI854247+++mKIAA0842	mRNA	6	URS00009BB269+++URS00009BCDBF+++URS00009C5697+++XR_390780+++NM_001033150+++NM_001347237	coding	known	NC_000070.6	141625732	141664146	+	4|4 D3	69582	NO_INFO	NO_INFO	69582	NA	K15348	NA	NA
74525	74525	Fam234b	1.4	1.79	4.33	6.4	7.9	7.1	1.52	2.17	5.71	8.35	9.78	8.9	86	128	320	467	562	517	7.13333	2.50667	9.01	3.13333	515.333	178	1.57811	0.000279509	2.23607e-06	Fam234b	8430419L09Rik+++mKIAA1467	mRNA	7	NM_001362110+++NM_001362111+++NM_028982+++XM_006506715+++XM_030255645+++XM_030255646+++XM_030255647	coding	known	NC_000072.6	135196880	135236242	+	6|6 G1	74525	NO_INFO	NO_INFO	74525	NA	NO_INFO	Fam234b	NA
115487110	115487110	LOC115487110	0.04	0.03	0.06	0.07	0.04	0	0.05	0.04	0.07	0.09	0.05	0	1.25	1	1.94	2.49	1.23	0	0.0366667	0.0433333	0.0466667	0.0533333	1.24	1.39667	-0.0267482	0.999812	0.988735	LOC115487110	NA	mRNA	2	URS00009B5D93+++XM_030244452	coding	known	NC_000067.6	100224482	100231910	-	NO_INFO	115487110	NO_INFO	NO_INFO	115487110	NA	NO_INFO
100090	100090	Zbtb48	11.16	10.38	9.27	6.53	6.9	7.54	12.16	12.58	12.24	8.52	8.54	9.45	305	338	306	218	224	269	6.99	10.27	8.83667	12.3267	237	316.333	-0.431553	0.281854	0.025747	Zbtb48	0610011D15Rik+++AI327031+++Hkr3+++TZAP	mRNA	11	XR_003954857+++XR_003954858+++XR_003954859+++XR_003954860+++NM_133879+++XM_006538448+++XM_006538449+++XM_006538451+++XM_017319883+++XM_017319884+++XM_030253048	coding	known	NC_000070.6	152019773	152027675	-	4|4 E2	100090	NO_INFO	NO_INFO	100090	NA	NO_INFO	NA	NA
217069	217069	Trim25	8.34	8.72	15.26	14.83	9.8	8.87	9.08	10.57	20.14	19.35	12.13	11.12	688	835	1512	1451	932	865	11.1667	10.7733	14.2	13.2633	1082.67	1011.67	0.108499	0.952797	0.676611	Trim25	AA960166+++AL022677+++EFP+++Zfp147	mRNA	5	URS00009C0A7B+++URS00009C15EC+++NM_009546+++XM_017314476+++rna-NM_009546.2-2	coding	known	NT_187003.1	2139167	89020294	+	11|11 C	217069	NO_INFO	NO_INFO	217069	NA	K10652	Trim25	NA
381101	381101	Dnph1	5.1	3.89	3.76	2.23	2.7	3.46	5.55	4.71	4.96	2.91	3.34	4.34	68	60	60	35	41	54	2.79667	4.25	3.53	5.07333	43.3333	62.6667	-0.556445	0.512011	0.08873	Dnph1	C76683+++Rcl	mRNA	1	NM_207161	coding	known	NC_000083.6	46496789	46499618	+	17|17 C	381101	NO_INFO	NO_INFO	381101	NA	NO_INFO	Dnph1	NA
53318	53318	Pdlim3	0.05	0.43	0.19	0	0	0.12	0.05	0.52	0.25	0	0	0.15	1	11	5	0	0	3	0.04	0.223333	0.05	0.273333	1	5.66667	-2.42292	0.524467	0.0953235	Pdlim3	AI463105+++ALP+++Actn2lp	mRNA	3	URS00009AEB92+++NM_016798+++XM_006509465	coding	known	NC_000074.6	45885451	45922424	+	8|8 B1.1	53318	NO_INFO	NO_INFO	53318	NA	NO_INFO	Pdlim3	NA
18037	18037	Nfkbie	1.12	1.9	1.57	1.19	0.98	0.62	1.22	2.3	2.07	1.55	1.22	0.78	38	75	64	48	38	25	0.93	1.53	1.18333	1.86333	37	59	-0.658447	0.419832	0.0574356	Nfkbie	I-kappa-B-epsilon+++IKBE+++IkB-E+++NF-kappa-BIE+++ikB-epsilon	mRNA	3	URS00009B619A+++NM_001304956+++NM_008690	coding	known	NC_000083.6	45555700	45563169	+	17|17 B3	18037	NO_INFO	NO_INFO	18037	NA	K05872	Nfkbie	NA
18574	18574	Pde1b	0.52	0.6	0.62	0.48	0.43	0.42	0.57	0.73	0.82	0.63	0.54	0.53	23	31	33	23	22	21	0.443333	0.58	0.566667	0.706667	22	29	-0.396764	0.793472	0.313108	Pde1b	Pde1b1	mRNA	4	NM_001285890+++NM_001357980+++NM_008800+++XM_030248407	coding	known	NC_000081.6	103503034	103530056	+	15|15 F3	18574	NO_INFO	NO_INFO	18574	NA	K13755	Pde1b	NA
67367	67367	Paxbp1	5.26	3.96	3.55	3.69	3.56	3.99	5.72	4.79	4.69	4.81	4.41	5.01	291	254	236	242	227	261	3.74667	4.25667	4.74333	5.06667	243.333	260.333	-0.131946	0.933133	0.553572	Paxbp1	1810007M14Rik+++C21orf66+++Gcfc+++Gcfc1+++Pax3/7bp	mRNA	2	NR_152264+++NM_026110	coding	known	NC_000082.6	91014037	91044379	-	16|16 C3.3	67367	NO_INFO	NO_INFO	67367	NA	NO_INFO	Paxbp1	NA
68833	68833	Pdcl3	10.45	11.31	9.79	9.86	9.93	9.83	11.38	13.71	12.93	12.86	12.29	12.32	237	297	266	264	258	262	9.87333	10.5167	12.49	12.6733	261.333	266.667	-0.0361791	0.959049	0.831809	Pdcl3	1110061A19Rik+++C80025+++Viaf1	mRNA	2	URS00009C1FA2+++NM_026850	coding	known	NC_000067.6	38987814	38997236	+	1|1 B	68833	NO_INFO	NO_INFO	68833	NA	NO_INFO	NA	NA
268860	268860	Abat	34.68	48.18	60.74	47.09	62.18	53.68	37.77	58.39	80.19	61.45	76.96	67.31	2330	3804	4961	3793	4877	4310	54.3167	47.8667	68.5733	58.7833	4326.67	3698.33	0.255994	0.704093	0.216208	Abat	9630038C02Rik+++AI255750+++Gabaat+++Gabat+++Gm9851+++I54+++Laibat+++X61497	mRNA	3	URS00009AD688+++NM_001170978+++NM_172961	coding	known	NC_000082.6	8513429	8621568	+	16|16 A1	268860	NO_INFO	NO_INFO	268860	NA	K13524	NA	COG0160///NA
96957	96957	Tmem62	3.23	2.65	3.11	2.8	2.63	2.36	3.52	3.21	4.11	3.65	3.25	2.96	111	109	152	135	123	105	2.59667	2.99667	3.28667	3.61333	121	124	-0.0448245	0.964979	0.848671	Tmem62	B830009D23Rik+++C77355	mRNA	4	URS00009C047A+++XR_374546+++NM_175285+++XM_030252259	coding	known	NC_000068.7	120976478	121007849	+	2|2 E5	96957	NO_INFO	NO_INFO	96957	NA	NO_INFO	NA	NA
23997	23997	Psmd13	24.01	39.37	35.56	38.32	32.59	31.8	26.15	47.71	46.94	50	40.34	39.87	491	932	871	925	763	764	34.2367	32.98	43.4033	40.2667	817.333	764.667	0.116563	0.921041	0.526407	Psmd13	S11	mRNA	2	URS00009C352C+++NM_011875	coding	known	NC_000073.6	140882394	140898692	+	7|7 F5	23997	NO_INFO	NO_INFO	23997	NA	K03039	NA	NA
12493	12493	Cd37	2.64	4.24	2.89	2.4	2.93	2.32	2.88	5.14	3.81	3.13	3.63	2.91	45	80	59	46	57	47	2.55	3.25667	3.22333	3.94333	50	61.3333	-0.283771	0.824476	0.347481	Cd37	Tspan26	mRNA	5	NM_001290802+++NM_001290804+++NM_007645+++XM_006540592+++XM_006540593	coding	known	NC_000073.6	45233632	45239340	-	7 B3|7 29.2 cM	12493	NO_INFO	NO_INFO	12493	NA	K06475	Cd37	NA
71769	71769	Bbs10	2.95	2.77	1.8	1.86	1.25	1.48	3.22	3.35	2.37	2.43	1.55	1.86	115	125	84	86	56	68	1.53	2.50667	1.94667	2.98	70	108	-0.656665	0.274156	0.024367	Bbs10	1300007O09Rik+++AI452285	mRNA	1	NM_027914	coding	known	NC_000076.6	111298679	111301736	+	10|10 D1	71769	NO_INFO	NO_INFO	71769	NA	NO_INFO	NA	NA
319817	319817	Rc3h2	1.15	0.95	0.75	0.91	1	1.11	1.25	1.15	0.99	1.19	1.24	1.39	158	152	123	148	158	178	1.00667	0.95	1.27333	1.13	161.333	144.333	0.132563	0.943654	0.585296	Rc3h2	2900024N03Rik+++9430019J22Rik+++D930043C02Rik+++Mnab+++Rnf164	mRNA	6	URS00009B4769+++URS00009B5076+++URS00009BFD40+++NM_001100591+++NM_001290642+++XM_006498124	coding	known	NC_000068.7	37368861	37424370	-	2|2 B	319817	NO_INFO	NO_INFO	319817	NA	NO_INFO	Rc3h2	NA
24075	24075	Taf10	235.66	210.26	158.82	158.7	166.61	159.43	256.65	254.8	209.67	207.1	206.22	199.93	1858	1910	1487	1459	1479	1459	161.58	201.58	204.417	240.373	1465.67	1751.67	-0.286965	0.594911	0.133337	Taf10	30kDa+++AU041226+++TAFII30+++Taf2h	mRNA	2	NM_020024+++XM_006507814	coding	known	NC_000073.6	105742894	105744375	-	7|7 E3	24075	NO_INFO	NO_INFO	24075	NA	K03134	NA	NA
66141	66141	Ifitm3	1531.52	1396.48	1065.2	857.75	1070	922.71	1667.93	1692.27	1406.28	1119.35	1324.41	1157.07	9526	10003	7887	6215	7480	6633	950.153	1331.07	1200.28	1588.83	6776	9138.67	-0.457119	0.222385	0.0173633	Ifitm3	1110004C05Rik+++Cd225+++Cdw217+++DSPA2b+++Fgls+++IP15+++mil-1	mRNA	1	NM_025378	coding	known	NC_000073.6	141009590	141010744	-	7|7 F5	66141	NO_INFO	NO_INFO	66141	NA	NO_INFO	Ifitm3	NA
80286	80286	Tusc3	2.42	3.47	4.93	5.24	4.94	5.57	2.63	4.2	6.51	6.84	6.11	6.98	83	99	136	144	136	157	5.25	3.60667	6.64333	4.44667	145.667	106	0.462038	0.362625	0.0423007	Tusc3	AU022242+++BC003311+++N33	mRNA	13	URS00009AF8DE+++URS00009B5418+++URS00009BC7D7+++NM_001357304+++NM_001357305+++NM_001357306+++NM_030254+++XM_017313024+++XM_017313026+++XM_017313027+++XM_017313028+++XM_017313029+++XM_030243860	coding	known	NC_000074.6	39005351	39167050	+	8|8 A4	80286	NO_INFO	NO_INFO	80286	NA	K12669	Tusc3	NA
68441	68441	Rraga	21.53	23.31	22.06	24.38	20.44	19.24	23.45	28.25	29.12	31.81	25.3	24.13	457	573	561	611	497	480	21.3533	22.3	27.08	26.94	529.333	530.333	-0.0101884	0.999588	0.948097	Rraga	1300010C19Rik+++AI255374+++FIP-1+++RAGA	mRNA	1	NM_178376	coding	known	NC_000070.6	86575673	86577285	+	4|4 C4	68441	NO_INFO	NO_INFO	68441	NA	K16185	NA	NA
66771	66771	Gid4	5.82	7.96	7.79	7.74	6.23	7.14	6.34	9.65	10.29	10.1	7.71	8.95	376	596	604	592	463	544	7.03667	7.19	8.92	8.76	533	525.333	0.0311615	0.966843	0.853393	Gid4	4933439F18Rik	mRNA	2	URS00009BC07B+++NM_025757	coding	known	NC_000077.6	60417145	60448076	+	11|11 B2	66771	NO_INFO	NO_INFO	66771	NA	NO_INFO	NA	NA
217030	217030	Synrg	1.46	1.71	2.01	1.43	1.65	1.39	1.59	2.07	2.65	1.87	2.05	1.74	164	221	278	193	212.01	182	1.49	1.72667	1.88667	2.10333	195.67	221	-0.16586	0.861761	0.409998	Synrg	Ap1gbp1+++SYNG	mRNA	13	URS00009BDEBE+++NM_194341+++XM_006532979+++XM_006532980+++XM_006532981+++XM_006532982+++XM_006532984+++XM_006532985+++XM_006532986+++XM_006532988+++XM_017314469+++XM_017314470+++XM_030245844	coding	known	NC_000077.6	83964390	84044578	+	11|11 C	217030	NO_INFO	NO_INFO	217030	NA	NO_INFO	NA	NA
234686	234686	Fhod1	1.8	2.22	1.69	1.41	1.21	1.41	1.96	2.69	2.24	1.84	1.5	1.77	104	148	117	96	80	96	1.34333	1.90333	1.70333	2.29667	90.6667	123	-0.443615	0.408538	0.054497	Fhod1	BC017144+++FHOS+++FHOS1	mRNA	3	XR_003947263+++NM_177699+++XM_030243503	coding	known	NC_000074.6	105329160	105348062	-	8|8 D3	234686	NO_INFO	NO_INFO	234686	NA	K23938	NA	NA
69185	69185	Dtwd1	5.49	4.84	3.68	2.22	3.01	4.36	5.98	5.86	4.86	2.9	3.73	5.47	96	98	75	47	61	89	3.19667	4.67	4.03333	5.56667	65.6667	89.6667	-0.472259	0.613141	0.142591	Dtwd1	1810033A06Rik	mRNA	6	URS00009C1B49+++NM_001355583+++NM_026981+++XM_006500130+++XM_006500131+++XM_006500132	coding	known	NC_000068.7	126152085	126165277	+	2|2 F1	69185	NO_INFO	NO_INFO	69185	NA	NO_INFO	NA	NA
55948	55948	Sfn	1.08	1.02	0.94	0.72	0.74	0.68	1.18	1.23	1.25	0.94	0.92	0.85	23	25	24	18	18	17	0.713333	1.01333	0.903333	1.22	17.6667	24	-0.454085	0.779352	0.294203	Sfn	14-3-3+++Er+++Mme1+++Ywhas	mRNA	1	NM_018754	coding	known	NC_000070.6	133600556	133602168	-	4 D2.3|4 66.25 cM	55948	NO_INFO	NO_INFO	55948	NA	K06644	Sfn	NA
319149	319149	H3c4	0.5	1.18	0.63	0	0	0.22	0.55	1.43	0.84	0	0	0.28	2	5.41	3	0	0	1	0.0733333	0.77	0.0933333	0.94	0.333333	3.47	-3.19479	0.446061	0.0660976	H3c4	H3-b+++H3c13+++H3c14+++H3c15+++H3c2+++H3c3+++H3c6+++H3c7+++Hist1h3d	mRNA	1	NM_178204	coding	known	NC_000079.6	23575763	23576266	+	13|13 A3.1	319149	NO_INFO	NO_INFO	319149	NA	K11253	NA	NA
57170	57170	Dolpp1	6.5	5.96	6.42	5.91	6.27	6.41	7.08	7.22	8.48	7.71	7.76	8.03	184	215	238	219	223	235	6.19667	6.29333	7.83333	7.59333	225.667	212.333	0.0837516	0.952797	0.640634	Dolpp1	0610011H20Rik+++AB030189+++LSFR2	mRNA	6	NR_110963+++NM_001290508+++NM_001290509+++NM_020329+++XM_006498207+++XM_030251911	coding	known	NC_000068.7	30392254	30400529	+	2|2 B	57170	NO_INFO	NO_INFO	57170	NA	K07252	Dolpp1	NA
218820	218820	Zfp503	0.83	1.24	1.03	0.77	0.69	0.7	0.91	1.51	1.36	1.01	0.86	0.88	49	85	73	54	47	49	0.72	1.03333	0.916667	1.26	50	69	-0.45517	0.550765	0.107838	Zfp503	AI181838+++B830002A16Rik+++Nolz-1+++Nolz1+++Znf503	mRNA	2	NM_145459+++XM_030247747	coding	known	NC_000080.6	21983959	21989601	-	14 A3|14 12.0 cM	218820	NO_INFO	NO_INFO	218820	NA	NO_INFO	Zfp503	NA
115489986	115489986	LOC115489986	0.3	1.35	0.3	0.15	0.07	0.1	0.33	1.63	0.4	0.2	0.09	0.13	5	26	6	3	1.35	2	0.106667	0.65	0.14	0.786667	2.11667	12.3333	-2.58317	0.145073	0.00858789	LOC115489986	NA	mRNA	1	XM_030254000	coding	known	NC_000070.6	46583702	46585020	+	NO_INFO	115489986	NO_INFO	NO_INFO	115489986	NA	NO_INFO
16651	16651	Sspn	0.11	0.15	0.12	0.2	0.21	0.36	0.12	0.18	0.16	0.26	0.26	0.46	7	11	9	15	16	27	0.256667	0.126667	0.326667	0.153333	19.3333	9	1.10854	0.383629	0.0469051	Sspn	Krag	mRNA	9	URS0000763559+++URS00009B0FEE+++URS00009B4365+++URS00009C5382+++NM_001310837+++NM_010656+++XM_006506916+++rna-NM_001310837.1-2+++rna-NM_010656.3-2	coding	known	NT_166305.2	2443667	145965225	+	6 G3|6 77.7 cM	16651	NO_INFO	NO_INFO	16651	NA	NO_INFO	NA	NA
71913	71913	Tmem79	1.92	1.56	1.21	1.87	1.42	1.21	2.1	1.9	1.6	2.45	1.76	1.51	60	52	44	64	46	42	1.5	1.56333	1.90667	1.86667	50.6667	52	-0.0747361	0.956733	0.823954	Tmem79	2310042N02Rik+++2310074C17Rik+++Matt+++ma	mRNA	5	URS00009AE4F1+++URS00009B15F0+++NM_024246+++XM_006502124+++XM_006502125	coding	known	NC_000069.6	88328653	88334685	+	3|3 F1	71913	NO_INFO	NO_INFO	71913	NA	NO_INFO	NA	NA
67212	67212	Mrpl55	37.66	34.21	29.53	25.89	27.57	24.25	41.01	41.46	38.99	33.79	34.13	30.41	413	433	388	334	343	310	25.9033	33.8	32.7767	40.4867	329	411.333	-0.343167	0.434963	0.0625555	Mrpl55	2810038N09Rik+++L55mt+++MRP-L55	mRNA	13	NR_126101+++NM_001302334+++NM_001302335+++NM_001302336+++NM_001362908+++NM_001362909+++NM_026035+++XM_006533974+++XM_006533975+++XM_006533976+++XM_030246239+++XM_030246240+++XM_030246241	coding	known	NC_000077.6	59202486	59206138	+	11|11 B1.3	67212	NO_INFO	NO_INFO	67212	NA	NO_INFO	NA	NA
11435	11435	Chrna1	0	0.01	0	0	0	0.01	0	0.02	0	0	0	0.02	0	1	0	0	0	1	0.00333333	0.00333333	0.00666667	0.00666667	0.333333	0.333333	-0.0119435	0.999812	0.997383	Chrna1	AI385656+++AI608266+++Achr-1+++Acra	mRNA	1	NM_007389	coding	known	NC_000068.7	73563281	73580338	-	2 C3|2 43.76 cM	11435	NO_INFO	NO_INFO	11435	NA	K04803	Chrna1	NA
54150	54150	Rdh7	556.12	602.34	533.6	501.87	516.38	532.13	605.65	729.92	704.45	654.94	639.16	667.29	11570	14608	13390	12412	12387	13099	516.793	564.02	653.797	680.007	12632.7	13189.3	-0.0685315	0.944386	0.587716	Rdh7	AI194929+++CRAD2	mRNA	2	NM_001150749+++NM_017473	coding	known	NC_000076.6	127884027	127889247	-	10|10 D3	54150	NO_INFO	NO_INFO	54150	NA	K11154	Rdh7	NA
13088	13088	Cyp2b10	1.62	3.78	5.83	1.47	0.93	1.21	1.76	4.58	7.69	1.92	1.15	1.51	41	111	177	44	27	36	1.20333	3.74333	1.52667	4.67667	35.6667	109.667	-1.57066	0.00710408	0.000116309	Cyp2b10	Cyp2b+++Cyp2b20+++p16	mRNA	1	NM_009999	coding	known	NC_000073.6	25897658	25926624	+	7 A3|7 14.11 cM	13088	NO_INFO	NO_INFO	13088	NA	K07412	Cyp2b10	NA
74488	74488	Lrrc15	0	0	0	0	0.01	0	0	0	0	0	0.01	0	0	0	0	0	1	0	0.00333333	0	0.00333333	0	0.333333	0	0.949827	0.952797	0.815937	Lrrc15	5430427N11Rik+++LIB	mRNA	5	URS00009AD4EB+++URS00009AE9F9+++URS00009BDB61+++URS00009C313F+++NM_028973	coding	known	NC_000082.6	30259738	30283254	+	16|16 B2	74488	NO_INFO	NO_INFO	74488	NA	NO_INFO	Lrrc15	NA
12509	12509	Cd59a	45.59	38.68	35.87	26.77	28.96	33.15	49.65	46.87	47.36	34.94	35.85	41.56	1068.42	1050.2	1012.12	743.55	781.38	918.53	29.6267	40.0467	37.45	47.96	814.487	1043.58	-0.381736	0.347907	0.0386851	Cd59a	AA987121+++Cd59+++protectin	mRNA	6	URS00009C2019+++NM_001111060+++NM_007652+++XM_006498650+++XM_006498651+++XM_030247036	coding	known	NC_000068.7	104095753	104115410	+	2 E2|2 54.53 cM	12509	NO_INFO	NO_INFO	12509	NA	K04008	Cd59a	NA
66902	66902	Mtap	3.93	4.92	4.06	4.68	4.19	4.87	4.27	5.97	5.36	6.11	5.19	6.1	141	205	175	199	173	206	4.58	4.30333	5.8	5.2	192.667	173.667	0.149986	0.872172	0.435619	Mtap	1300019I21Rik+++MSAP	mRNA	3	URS00009B73DC+++URS00009BBC7D+++NM_024433	coding	known	NC_000070.6	89137370	89181090	+	4|4 C4	66902	NO_INFO	NO_INFO	66902	NA	K00772	Mtap	COG0005///NA
13404	13404	Dmc1	0	0	0	0.03	0	0	0	0	0	0.04	0	0	0	0	0	1	0	0	0.01	0	0.0133333	0	0.333333	0	0.949827	0.952797	0.815937	Dmc1	Dmc1h+++Lim15+++Mei11+++sgdp	mRNA	7	NR_103477+++URS00009C4FA0+++NM_001278226+++NM_010059+++XM_006520407+++XM_006520408+++XM_006520409	coding	known	NC_000081.6	79561497	79605159	-	15 E1|15 37.79 cM	13404	NO_INFO	NO_INFO	13404	NA	NO_INFO	NA	NA
106878	106878	Smim3	0.27	0.26	0.39	0.38	0.36	0.44	0.3	0.31	0.52	0.49	0.45	0.55	7	8	10	12	11	14	0.393333	0.306667	0.496667	0.376667	12.3333	8.33333	0.563647	0.826558	0.350316	Smim3	2010002N04Rik+++AI195350+++AW561905+++Nid67+++cI-41	mRNA	6	URS00009B7190+++NM_134133+++XM_006525481+++XM_006525482+++XM_011246797+++rna-NM_134133.2-2	coding	known	NT_187030.1	20931	60518949	+	18|18 D3	106878	NO_INFO	NO_INFO	106878	NA	NO_INFO	Smim3	NA
78913	78913	Ltn1	2.32	2.93	3.71	3.35	3.15	3.47	2.53	3.55	4.9	4.37	3.9	4.35	220	295	425	347	295	359	3.32333	2.98667	4.20667	3.66	333.667	313.333	0.10344	0.952797	0.620232	Ltn1	4930528H02Rik+++AV266914+++C87237+++Listerin+++Rnf160+++Zfp294	mRNA	6	URS00009AF19E+++URS00009C2665+++XR_384950+++XR_384951+++NM_001081068+++XM_006523111	coding	known	NC_000082.6	87371750	87432619	+	16|16 C3.3	78913	NO_INFO	NO_INFO	78913	NA	NO_INFO	NA	COG5219///NA
77877	77877	6030458C11Rik	2.36	2.33	3.22	2.47	2.18	2.54	2.57	2.83	4.26	3.22	2.7	3.19	129	141	200	169	138	166	2.39667	2.63667	3.03667	3.22	157.667	156.667	0.00686417	0.999812	0.975046	6030458C11Rik	NA	mRNA	4	NM_001166360+++NM_001357761+++NM_029998+++XM_011245382	coding	known	NC_000081.6	12808177	12824679	-	15|15 A1	77877	NO_INFO	NO_INFO	77877	NA	NO_INFO	NA	NA
115486886	115486886	LOC115486886	0	0.04	0	0	0	0	0	0.05	0	0	0	0	0	1	0	0	0	0	0	0.0133333	0	0.0166667	0	0.333333	-0.973727	0.952797	0.811392	LOC115486886	NA	mRNA	4	URS0000769B16+++URS00009AF7F9+++URS0001BBE5A0+++XM_030243889	coding	known	NC_000074.6	121947050	121954314	-	8 E1|8	115486886	NO_INFO	NO_INFO	115486886	NA	NO_INFO	NA	NA
50528	50528	Tmprss2	0.56	0.6	0.52	1.47	1.96	1.07	0.61	0.73	0.68	1.92	2.42	1.34	25	31	28	79	102	57	1.5	0.56	1.89333	0.673333	79.3333	28	1.49901	0.00103542	1.02097e-05	Tmprss2	D16Ertd61e	mRNA	5	URS00009B3A58+++URS00009C3F91+++NM_015775+++XM_006523064+++XM_006523065	coding	known	NC_000082.6	97564682	97659541	-	16 C4|16 57.53 cM	50528	NO_INFO	NO_INFO	50528	NA	K09633	Tmprss2	NA
109979	109979	Art3	0.98	1.57	1.16	1.53	1.45	1.91	1.07	1.91	1.54	1.99	1.8	2.4	19	34	27	35	31	44	1.63	1.23667	2.06333	1.50667	36.6667	26.6667	0.46846	0.698417	0.211626	Art3	4930569O04Rik+++ARTC3	mRNA	27	URS00009C4626+++NM_001310664+++NM_001310665+++NM_001370591+++NM_181728+++XM_006534706+++XM_006534707+++XM_006534708+++XM_006534709+++XM_006534710+++XM_006534711+++XM_006534712+++XM_006534713+++XM_006534714+++XM_006534716+++XM_006534718+++XM_006534719+++XM_006534720+++XM_006534721+++XM_011249389+++XM_030254048+++XM_030254049+++XM_030254050+++XM_030254051+++XM_030254052+++XM_030254053+++XM_030254054	coding	known	NC_000071.6	92331799	92414628	+	5 E2|5 46.54 cM	109979	NO_INFO	NO_INFO	109979	NA	NO_INFO	Art3	NA
67604	67604	Get4	11	11.78	12.09	11.52	12.17	9.2	11.98	14.27	15.96	15.03	15.07	11.54	307	393	416	391	402	309	10.9633	11.6233	13.88	14.07	367.333	372	-0.0186595	0.986199	0.914918	Get4	1110007L15Rik+++AW412535+++Cee	mRNA	5	URS00009B6CE2+++URS00009C4D94+++NM_001163316+++NM_001359238+++NM_026269	coding	known	NC_000071.6	139252324	139270050	+	5|5 G2	67604	NO_INFO	NO_INFO	67604	NA	NO_INFO	NA	NA
76560	76560	Prss8	5.1	3.82	4.18	5.38	3.36	4.69	5.55	4.63	5.52	7.01	4.15	5.88	121	106	121	156	94	134	4.47667	4.36667	5.68	5.23333	128	116	0.112666	0.952797	0.665821	Prss8	2410039E18Rik+++AI313909+++C79772+++CAP1+++fr+++mCAP1	mRNA	2	NM_133351+++XM_006508306	coding	known	NC_000073.6	127925717	127930149	-	7 F3|7 69.84 cM	76560	NO_INFO	NO_INFO	76560	NA	NO_INFO	Prss8	NA
69171	69171	Cnppd1	23.44	25.93	23.89	29.62	25.28	26.41	25.52	31.42	31.54	38.65	31.29	33.12	676	899	875	1070	878	938	27.1033	24.42	34.3533	29.4933	962	816.667	0.233354	0.519857	0.093268	Cnppd1	1810031K17Rik+++AU043960	mRNA	4	NM_001356264+++NM_026977+++XM_006496541+++XM_006496542	coding	known	NC_000067.6	75135762	75142744	-	1|1 C4	69171	NO_INFO	NO_INFO	69171	NA	NO_INFO	Cnppd1	NA
19244	19244	Ptp4a2	26.2	24.03	25.89	26.79	27.75	26.93	28.54	29.12	34.17	34.97	34.35	33.77	1284	1370	1524	1561	1567	1562	27.1567	25.3733	34.3633	30.61	1563.33	1392.67	0.154686	0.767176	0.277796	Ptp4a2	Prl-2	mRNA	11	URS00009B28BF+++URS00009B787E+++URS00009BA10D+++NM_001164745+++NM_008974+++XM_006502863+++XM_017320045+++XM_030253321+++XM_030253322+++rna-NM_001164745.1-2+++rna-NM_008974.4-2	coding	known	NT_187023.1	1420968	129850003	+	4|4 D2.2	19244	NO_INFO	NO_INFO	19244	NA	NO_INFO	NA	NA
269060	269060	Dagla	0.32	0.3	0.21	0.23	0.17	0.19	0.35	0.36	0.28	0.3	0.21	0.24	27	29	21	23	16	19	0.196667	0.276667	0.25	0.33	19.3333	25.6667	-0.432873	0.79923	0.320634	Dagla	Nsddr	mRNA	3	NM_198114+++XM_006527114+++XM_017318213	coding	known	NC_000085.6	10245265	10304877	-	19|19 A	269060	NO_INFO	NO_INFO	269060	NA	K13806	NA	NA
68053	68053	Ubxn2b	0.62	0.74	0.66	0.37	0.49	0.52	0.67	0.9	0.87	0.49	0.6	0.65	43	60	55	31	39	43	0.46	0.673333	0.58	0.813333	37.6667	52.6667	-0.480426	0.59109	0.131202	Ubxn2b	3110003A22Rik+++6430407D20Rik+++AI451665+++p37	mRNA	1	NM_026534	coding	known	NC_000070.6	6191105	6219788	+	4|4 A1	68053	NO_INFO	NO_INFO	68053	NA	NO_INFO	Ubxn2b	NA
74772	74772	Atp13a2	4	7.09	5.9	8.14	6.57	5.11	4.35	8.59	7.79	10.63	8.13	6.4	237	486.21	424	573	451	367	6.60667	5.66333	8.38667	6.91	463.667	382.403	0.299437	0.666715	0.182339	Atp13a2	1110012E06Rik+++AA589443	mRNA	7	XR_003955033+++NM_001164366+++NM_029097+++XM_006539236+++XM_006539237+++XM_017320424+++XM_030253864	coding	known	NC_000070.6	140986216	141007701	+	4|4 D3	74772	NO_INFO	NO_INFO	74772	NA	NO_INFO	Atp13a2	COG0474///NA
22757	22757	Zkscan5	6.7	5.31	5.66	5.31	6.25	5.72	7.29	6.44	7.47	6.92	7.73	7.17	253	234	275	253	268	266	5.76	5.89	7.27333	7.06667	262.333	254	0.0279928	0.977119	0.885716	Zkscan5	AI132486+++AI326970+++Zfp95+++hKraba1	mRNA	10	NM_001167944+++NM_001359187+++NM_001359188+++NM_001359189+++NM_001359190+++NM_001359191+++NM_001359192+++NM_016683+++XM_006504822+++XM_011241010	coding	known	NC_000071.6	145204559	145221752	+	5|5 G2	22757	NO_INFO	NO_INFO	22757	NA	NO_INFO	NA	NA
84544	84544	Cd96	0.18	0.28	0.17	0.03	0.14	0.12	0.19	0.34	0.22	0.04	0.18	0.15	5	9	6	1	5	4	0.0966667	0.21	0.123333	0.25	3.33333	6.66667	-0.982662	0.769721	0.281896	Cd96	1700109I12Rik+++Tactile	mRNA	3	URS00009B7E8F+++NM_032465+++XM_017317168	coding	known	NC_000082.6	46035652	46120248	-	16|16 B5	84544	NO_INFO	NO_INFO	84544	NA	NO_INFO	Cd96	NA
67966	67966	Zcchc10	2.17	2.04	1.28	2.16	2.4	2.39	2.36	2.47	1.69	2.82	2.97	3	34	37	24	40	43	44	2.31667	1.83	2.93	2.17333	42.3333	31.6667	0.398127	0.760056	0.269236	Zcchc10	2410141K03Rik+++AA675321+++D11Ertd416e	mRNA	1	NM_026479	coding	known	NC_000077.6	53324689	53333301	+	11 B1.3|11 31.92 cM	67966	NO_INFO	NO_INFO	67966	NA	NO_INFO	NA	NA
16334	16334	Ins2	0	0	1.68	0	0	0	0	0	2.21	0	0	0	0	0	7	0	0	0	0	0.56	0	0.736667	0	2.33333	-3.56672	0.67957	0.193356	Ins2	AA986540+++Ins-2+++InsII+++Mody+++Mody4	mRNA	3	NM_001185083+++NM_001185084+++NM_008387	coding	known	NC_000073.6	142678656	142679726	-	7 F5|7 88.0 cM	16334	NO_INFO	NO_INFO	16334	NA	K04526	Ins2	NA
74570	74570	Zkscan1	2.9	4.07	3.37	3.49	3.66	3.62	3.16	4.94	4.45	4.55	4.52	4.54	336	557	497	502	502	507	3.59	3.44667	4.53667	4.18333	503.667	463.333	0.132463	0.864029	0.414412	Zkscan1	5930429A01Rik+++9130423L19Rik+++9230118B16Rik+++AI646829+++AI788588+++C87323+++KOX18+++PHZ-37+++ZNF139	mRNA	5	URS00009B60BE+++NM_029869+++NM_133906+++XM_006504628+++XM_011240958	coding	known	NC_000071.6	138085050	138107822	+	5|5 G2	74570	NO_INFO	NO_INFO	74570	NA	NO_INFO	NA	NA
56325	56325	Abcb9	0.96	0.72	0.8	0.76	0.82	0.67	1.04	0.87	1.05	0.99	1.01	0.84	46	40	46	43	45	38	0.75	0.826667	0.946667	0.986667	42	44	-0.087514	0.952797	0.789367	Abcb9	TAPL+++mKIAA1520	mRNA	3	XR_001784728+++NM_019875+++XM_017321012	coding	known	NC_000071.6	124061857	124095955	-	5|5 F	56325	NO_INFO	NO_INFO	56325	NA	K05656	NA	NA
14084	14084	Faf1	4.35	5.62	6.13	6.48	6.76	6.12	4.74	6.81	8.09	8.45	8.37	7.68	283	424	478	499	506	470	6.45333	5.36667	8.16667	6.54667	491.667	395	0.328381	0.397759	0.0513818	Faf1	AA408698+++Dffrx+++Fam	mRNA	7	URS00009ADCF6+++URS00009B5721+++URS00009BACB6+++URS00009BB897+++URS00009BFB1D+++URS00009C2BC9+++NM_007983	coding	known	NC_000070.6	109676627	109963960	+	4 C7|4 51.33 cM	14084	NO_INFO	NO_INFO	14084	NA	K20703	NA	NA
12313	12313	Calm1	40.31	40.37	38.99	34.7	38.24	37.18	43.9	48.92	51.47	45.28	47.33	46.62	2430	2822	2821	2479	2654	2646	36.7067	39.89	46.41	48.0967	2593	2691	-0.0622835	0.952797	0.646875	Calm1	AI256814+++AI327027+++AI461935+++AL024000+++CaM+++Calm+++Cam1	mRNA	4	URS00009BF0FE+++URS00009C2D57+++NM_001313934+++NM_009790	coding	known	NC_000078.6	100199435	100209824	+	12|12 E	12313	NO_INFO	NO_INFO	12313	NA	K02183	Calm1	NA
93897	93897	Fzd10	0	0	0	0.02	0	0	0	0	0	0.03	0	0	0	0	0	1	0	0	0.00666667	0	0.01	0	0.333333	0	0.949827	0.952797	0.815937	Fzd10	Fz-10	mRNA	1	NM_175284	coding	known	NC_000071.6	128601106	128604093	+	5|5 G1.3	93897	NO_INFO	NO_INFO	93897	NA	K02842	Fzd10	NA
56248	56248	Ak3	94.67	102.88	109.8	103.62	122.9	122.8	103.1	124.67	144.96	135.23	152.12	153.99	3770	4739	5220	4882	5613	5755	116.44	102.45	147.113	124.243	5416.67	4576.33	0.245832	0.512011	0.0888919	Ak3	AA407498+++AI506714+++AK-3+++Ak3l+++Ak3l1+++Akl3l	mRNA	6	URS00009B09FA+++URS00009BBF46+++URS00009BDD80+++NM_001365071+++NM_021299+++XM_006527222	coding	known	NC_000085.6	28995053	29048080	+	19|19 C1	56248	NO_INFO	NO_INFO	56248	NA	K00944	Ak3	NA
52150	52150	Kcnk6	0.37	0.66	0.7	0.64	0.49	0.65	0.4	0.8	0.92	0.83	0.61	0.82	22	46	50	45	34	46	0.593333	0.576667	0.753333	0.706667	41.6667	39.3333	0.105389	0.952797	0.765462	Kcnk6	D7Ertd764e+++Toss+++Twik2	mRNA	1	NM_001033525	coding	known	NC_000073.6	29221928	29232522	-	7 B1|7 16.94 cM	52150	NO_INFO	NO_INFO	52150	NA	NO_INFO	NA	NA
20935	20935	Surf6	2.36	3.43	3.16	3.16	2.24	2.76	2.57	4.16	4.17	4.13	2.77	3.46	101	170	162	160	110	139	2.72	2.98333	3.45333	3.63333	136.333	144.333	-0.0730495	0.952797	0.747264	Surf6	D2Wsu129e+++Surf-6	mRNA	1	NM_009298	coding	known	NC_000068.7	26890418	26902887	-	2 A3|2 19.08 cM	20935	NO_INFO	NO_INFO	20935	NA	NO_INFO	NA	NA
115489289	115489289	LOC115489289	0	0	0	0.06	0	0	0	0	0	0.07	0	0	0	0	0	1	0	0	0.02	0	0.0233333	0	0.333333	0	0.949827	0.952797	0.815937	LOC115489289	NA	mRNA	1	XM_030251580	coding	known	NC_000087.7	39988161	39990502	-	Y|Y B	115489289	NO_INFO	NO_INFO	115489289	NA	NO_INFO	NA	NA
71103	71103	Glt6d1	0	0.07	0	0	0	0	0	0.08	0	0	0	0	0	1	0	0	0	0	0	0.0233333	0	0.0266667	0	0.333333	-0.973727	0.952797	0.811392	Glt6d1	4933411C14Rik+++GT6m7	mRNA	7	URS00009B25CC+++URS00009B6CA1+++URS00009BC9B0+++URS0000EF0ED8+++XR_003953720+++XR_374116+++NM_001039095	coding	known	NC_000068.7	25771136	25815896	-	2|2 A3	71103	NO_INFO	NO_INFO	71103	NA	NO_INFO	NA	NA
19157	19157	Cyth1	14.4	16.86	17.26	16.42	12.97	16.51	15.68	20.43	22.79	21.43	16.05	20.7	644	860	844	847	653	860	15.3	16.1733	19.3933	19.6333	786.667	782.667	0.00502836	0.999812	0.97455	Cyth1	CLM1+++CTH-1+++CYTIP+++Pscd1	mRNA	14	URS00009B42A2+++URS00009BB1E8+++XR_001779921+++XR_003949350+++XR_003949351+++NM_001112699+++NM_001112700+++NM_011180+++XM_006532519+++XM_011248803+++XM_011248805+++XM_030245671+++XM_030245672+++XM_030245673	coding	known	NC_000077.6	118164166	118248616	-	11|11 E2	19157	NO_INFO	NO_INFO	19157	NA	K18441	NA	NA
66383	66383	Iscu	250.47	228.29	169.43	153.95	170.12	158.42	272.78	276.64	223.68	200.9	210.57	198.66	2622	2775	2134	1897	2035	1957	160.83	216.063	203.377	257.7	1963	2510.33	-0.381884	0.367075	0.0432978	Iscu	2310020H20Rik+++AA407971+++ISCU2+++Nifu+++Nifun	mRNA	4	NM_001363317+++NM_025526+++XM_030254754+++XM_030254755	coding	known	NC_000071.6	113772418	113778288	+	5|5 F	66383	NO_INFO	NO_INFO	66383	NA	NO_INFO	NA	NA
216445	216445	Arhgap9	0.91	1.98	1.41	1.53	1.11	0.96	0.99	2.4	1.86	1.99	1.37	1.2	25	63	47	47	33	31	1.2	1.43333	1.52	1.75	37	45	-0.259835	0.897323	0.480147	Arhgap9	AU043488	mRNA	9	NM_001285785+++NM_001359656+++NM_001359657+++NM_146011+++XM_006513569+++XM_006513571+++XM_030245045+++XM_030245046+++XM_030245047	coding	known	NC_000076.6	127321913	127329947	+	10|10 D3	216445	NO_INFO	NO_INFO	216445	NA	NO_INFO	NA	NA
17069	17069	Ly6e	191.95	457.55	291.8	250.79	293.27	214.43	209.05	554.47	385.23	327.28	363	268.9	3634	10252	6899	5782	6568	4916	252.83	313.767	319.727	382.917	5755.33	6928.33	-0.224858	0.843846	0.372602	Ly6e	Ly67+++RIG-E+++Sca-2+++TSA-1+++Tsa1	mRNA	9	URS00009C0843+++NM_001164036+++NM_001164037+++NM_001164038+++NM_001164039+++NM_001164040+++NM_008529+++XM_030248359+++XM_030248360	coding	known	NC_000081.6	74955016	74959905	+	15 D3|15 34.29 cM	17069	NO_INFO	NO_INFO	17069	NA	NO_INFO	Ly6e	NA
72371	72371	2210408I21Rik	0.16	0.26	0.18	0.15	0.17	0.16	0.17	0.32	0.24	0.19	0.21	0.2	8	19	16	9	12	13	0.16	0.2	0.2	0.243333	11.3333	14.3333	-0.31237	0.941203	0.579898	2210408I21Rik	NA	mRNA	6	URS00009BDB05+++URS00009C39F7+++NM_001081353+++NM_001145676+++XM_006517397+++XM_017315609	coding	known	NC_000079.6	77135531	77613785	+	13|13 C1	72371	NO_INFO	NO_INFO	72371	NA	NO_INFO	NA	NA
105247180	105247180	Gm42323	0	0.08	0.09	0.08	0.03	0.06	0	0.1	0.12	0.11	0.04	0.08	0	1	3	1	1	2	0.0566667	0.0566667	0.0766667	0.0733333	1.33333	1.33333	0.0690119	0.999812	0.967899	Gm42323	NA	mRNA	12	URS00009B0AE3+++URS00009C2D96+++XR_881477+++XR_881481+++XR_881483+++XR_881485+++XR_881486+++XM_011250364+++XM_011250365+++XM_011250366+++XM_030253969+++XM_030253971	coding	known	NC_000070.6	133511968	133519860	-	4 D2.3|4	105247180	NO_INFO	NO_INFO	105247180	NA	NO_INFO	NA	NA
216350	216350	Tspan8	0.48	0.56	0.11	0.22	0.24	0.34	0.53	0.68	0.15	0.29	0.29	0.43	9	12	2	4	5	7	0.266667	0.383333	0.336667	0.453333	5.33333	7.66667	-0.552796	0.914415	0.51405	Tspan8	C76990+++E330007O21Rik+++Tm4sf3	mRNA	5	NM_001168679+++NM_001168680+++NM_146010+++XM_006513542+++XM_006513543	coding	known	NC_000076.6	115816817	115849893	+	10|10 D2	216350	NO_INFO	NO_INFO	216350	NA	NO_INFO	Tspan8	NA
242819	242819	Rundc3b	0.08	0.13	0.06	0.06	0.03	0.08	0.08	0.15	0.08	0.08	0.04	0.1	4	8	4	4	2	5	0.0566667	0.09	0.0733333	0.103333	3.66667	5.33333	-0.537148	0.937662	0.561319	Rundc3b	Gm440	mRNA	6	URS00009B3522+++URS00009B5182+++NM_001347311+++NM_001359961+++NM_198620+++XM_006503578	coding	known	NC_000071.6	8490336	8623084	-	5|5 A1	242819	NO_INFO	NO_INFO	242819	NA	NO_INFO	NA	NA
56807	56807	Scamp5	1.55	2.29	1.66	2.48	1.72	2.3	1.69	2.77	2.19	3.24	2.13	2.88	79	130	102	141	94	138	2.16667	1.83333	2.75	2.21667	124.333	103.667	0.265014	0.771609	0.285468	Scamp5	Sc5	mRNA	4	NM_001301634+++NM_001301635+++NM_020270+++XM_030244475	coding	known	NC_000075.6	57441327	57468060	-	9|9 B	56807	NO_INFO	NO_INFO	56807	NA	NO_INFO	NA	NA
58222	58222	Rab37	0	0.09	0.08	0.14	0.09	0.11	0	0.1	0.11	0.18	0.11	0.14	0	3	3	5	3	4	0.113333	0.0566667	0.143333	0.07	4	2	1.05322	0.845572	0.375214	Rab37	B230331O03Rik+++B230354I04Rik	mRNA	6	XR_003949483+++XR_388502+++NM_001163753+++NM_021411+++XM_006533856+++XM_006533857	coding	known	NC_000077.6	115091331	115162773	+	11|11 E2	58222	NO_INFO	NO_INFO	58222	NA	NO_INFO	NA	NA
22248	22248	Unc119	9.07	8.96	7.89	9.08	9.61	7.93	9.88	10.86	10.41	11.85	11.9	9.94	148	171	153	178	175	154	8.87333	8.64	11.23	10.3833	169	157.333	0.0907327	0.952797	0.653448	Unc119	D11Bhm52+++HRG4+++MRG4+++Rg4+++Rtg4+++Unc119h	mRNA	5	NM_001313985+++NM_001313986+++NM_001313987+++NM_001313988+++NM_011676	coding	known	NC_000077.6	78343495	78349164	+	11 B5|11 46.74 cM	22248	NO_INFO	NO_INFO	22248	NA	NO_INFO	NA	NA
72368	72368	Borcs8	12.61	13.64	11.75	12.16	11.28	9.6	13.73	16.52	15.51	15.87	13.96	12.04	334	433	397	391	363	312	11.0133	12.6667	13.9567	15.2533	355.333	388	-0.132425	0.865457	0.424318	Borcs8	2310045N01Rik+++Mef2bnb	mRNA	6	NR_132131+++NR_132132+++NR_132133+++NM_001145552+++NM_001309645+++NM_001309841	coding	known	NC_000074.6	70139499	70148635	+	8|8 B3.3	72368	NO_INFO	NO_INFO	72368	NA	NO_INFO	NA	NA
80914	80914	Uck2	7.46	10.82	11.2	10.99	8.82	8.03	8.12	13.11	14.79	14.34	10.92	10.07	198	319	334	310	255	263	9.28	9.82667	11.7767	12.0067	276	283.667	-0.0278312	0.976044	0.880483	Uck2	AA407809+++AI481316+++AU018180+++AU020720+++TSA903+++UK+++UMK+++Umpk	mRNA	14	URS00008118FA+++URS0000811E5E+++URS0000811FC9+++URS00009B3920+++URS00009BD3D1+++URS00009BFA04+++URS00009C41B6+++URS00009C4727+++NM_030724+++XM_006497040+++XM_017312968+++XM_030243724+++XM_030243727+++XM_030243728	coding	known	NC_000067.6	167222886	167289856	+	1|1 H2.3	80914	NO_INFO	NO_INFO	80914	NA	K00876	NA	COG0572///NA
22626	22626	Slc23a3	0.17	0.06	0.06	0.17	0.12	0.07	0.19	0.07	0.08	0.22	0.15	0.09	8	3	2	9	6	4	0.12	0.0966667	0.153333	0.113333	6.33333	4.33333	0.457666	0.952797	0.61402	Slc23a3	SVCT3+++Yspl1	mRNA	6	XR_373540+++NM_194333+++XM_006496479+++XM_006496480+++XM_006496481+++XM_030253070	coding	known	NC_000067.6	75125541	75135223	-	1|1 C4	22626	NO_INFO	NO_INFO	22626	NA	NO_INFO	NA	NA
67603	67603	Dusp6	8.58	10.88	18.7	8.18	6.78	8.62	9.34	13.19	24.68	10.68	8.39	10.81	340	500	889	384	309	403	7.86	12.72	9.96	15.7367	365.333	576.333	-0.629923	0.212157	0.0160384	Dusp6	1300019I03Rik+++MKP-3+++MKP3+++PYST1	mRNA	1	NM_026268	coding	known	NC_000076.6	99263231	99267489	+	10|10 D1	67603	NO_INFO	NO_INFO	67603	NA	K21946	Dusp6	NA
67405	67405	Nts	0	0.06	0	0	0	0.06	0	0.07	0	0	0	0.07	0	1	0	0	0	1	0.02	0.02	0.0233333	0.0233333	0.333333	0.333333	-0.0119435	0.999812	0.997383	Nts	5033428E16Rik+++NMN-125+++NN+++NT+++NT/N+++NTS1	mRNA	2	NM_024435+++XM_006513992	coding	known	NC_000076.6	102481756	102490418	-	10|10 D1	67405	NO_INFO	NO_INFO	67405	NA	K05235	Nts	NA
115488784	115488784	LOC115488784	2.28	1.76	1.1	1.82	1.38	1.22	2.48	2.13	1.45	2.38	1.7	1.53	95	85	55	90	66	60	1.47333	1.71333	1.87	2.02	72	78.3333	-0.168352	0.952069	0.610424	LOC115488784	545228	mRNA	5	URS00009ADB53+++URS00009AEB32+++URS00009B2CBE+++URS0001980EB0+++XM_030250172	coding	known	NC_000083.6	86155688	86168388	-	17|17 E4	115488784	NO_INFO	NO_INFO	115488784	NA	NO_INFO	NA	NA
319151	319151	H3c6	0.19	0.25	0.16	0.25	0.17	0	0.21	0.31	0.21	0.32	0.21	0	2	3	2	3	2	0	0.14	0.2	0.176667	0.243333	1.66667	2.33333	-0.497061	0.952797	0.723273	H3c6	H3-f+++H3.1+++H3c13+++H3c14+++H3c15+++H3c2+++H3c3+++H3c4+++H3c7+++Hist1h3e	mRNA	1	NM_178205	coding	known	NC_000079.6	23561475	23562385	-	13|13 A3.1	319151	NO_INFO	NO_INFO	319151	NA	K11253	NA	NA
14118	14118	Fbn1	0.09	0.24	0.2	0.15	0.22	0.2	0.1	0.29	0.27	0.19	0.27	0.26	14	41	36	26	38	36	0.19	0.176667	0.24	0.22	33.3333	30.3333	0.175369	0.952797	0.672616	Fbn1	AI536462+++B430209H23+++Fib-1+++Tsk	mRNA	9	URS00009B08D4+++URS00009B93B2+++URS00009BBC19+++URS00009BE464+++URS0000EEBDEF+++XR_866221+++NM_007993+++XM_006498747+++XM_011239290	coding	known	NC_000068.7	125300594	125507881	+	2 F1|2 61.38 cM	14118	NO_INFO	NO_INFO	14118	NA	K06825	Fbn1	NA
102639543	102639543	Ifi206	0.49	0.88	1.01	0.39	0.53	0.63	0.53	1.06	1.33	0.51	0.66	0.79	23	49	58	23	29	35	0.516667	0.793333	0.653333	0.973333	29	43.3333	-0.54683	0.638816	0.159983	Ifi206	EG240921+++Gm4955+++Pyblhin-C	mRNA	2	XM_006497078+++XM_011238893	coding	known	NC_000067.6	173468418	173491318	-	1|1 H3	102639543	NO_INFO	NO_INFO	102639543	NA	NO_INFO	NA	NA
381196	381196	Gm960	0.15	0.08	0.08	0.1	0.03	0.03	0.16	0.1	0.11	0.14	0.04	0.03	5	3	3	4	1	1	0.0533333	0.103333	0.07	0.123333	2	3.66667	-0.936874	0.867659	0.428256	Gm960	TOPOVIBL+++Top6bl	mRNA	7	NM_001033447+++XM_011248634+++XM_011248635+++XM_011248636+++XM_011248637+++XM_011248638+++XM_011248639	coding	known	NC_000085.6	4625734	4698713	-	19|19 A	381196	NO_INFO	NO_INFO	381196	NA	NO_INFO	NA	NA
50769	50769	Atp8a2	0	0.06	0.09	0.03	0.03	0	0	0.07	0.11	0.04	0.04	0	0	4	6	2	2	0	0.02	0.05	0.0266667	0.06	1.33333	3.33333	-1.23954	0.864531	0.415529	Atp8a2	AI415030+++Atpc1b+++agil+++wl	mRNA	2	URS00009B65B9+++NM_015803	coding	known	NC_000080.6	59647531	60086914	-	14|14 C3- D1	50769	NO_INFO	NO_INFO	50769	NA	NO_INFO	NA	NA
231842	231842	Amz1	0.08	0.2	0.26	0.2	0.16	0.13	0.09	0.25	0.35	0.26	0.2	0.17	3	9	12	9	7	6	0.163333	0.18	0.21	0.23	7.33333	8	-0.0903099	0.981369	0.901934	Amz1	5330426I05+++6530401C20Rik	mRNA	1	NM_173405	coding	known	NC_000071.6	140724127	140753312	+	5|5 G2	231842	NO_INFO	NO_INFO	231842	NA	NO_INFO	NA	COG1913///NA
214305	214305	Hhipl1	0.03	0.09	0.14	0.09	0	0.07	0.03	0.11	0.18	0.12	0	0.09	1	4	6	4	0	3	0.0533333	0.0866667	0.07	0.106667	2.33333	3.66667	-0.614169	0.952797	0.623979	Hhipl1	1600002O04Rik+++AK129450+++mKIAA1822	mRNA	6	URS00009AD632+++URS00009B1A64+++URS00009B3CB3+++URS00009C0F2D+++NM_001044380+++XM_006515665	coding	known	NC_000078.6	108305968	108330867	+	12|12 F1	214305	NO_INFO	NO_INFO	214305	NA	NO_INFO	NA	NA
22756	22756	Zfp94	0.92	0.59	0.43	0.55	0.37	0.36	1.01	0.72	0.56	0.71	0.45	0.45	40	28	20	24	18	20	0.426667	0.646667	0.536667	0.763333	20.6667	29.3333	-0.561858	0.712521	0.224415	Zfp94	NA	mRNA	6	NM_001199321+++NM_009568+++XM_011250487+++XM_011250491+++XM_030242400+++XM_030242402	coding	known	NC_000073.6	24301704	24316698	-	7 A3|7 10.27 cM	22756	NO_INFO	NO_INFO	22756	NA	K09228	NA	NA
77652	77652	Zfp955a	1.07	1.31	1.19	1.29	0.99	1.09	1.17	1.59	1.57	1.68	1.23	1.36	54.19	76.43	75.28	83.09	62.18	69.25	1.12333	1.19	1.42333	1.44333	71.5067	68.6333	0.0617587	0.952797	0.813829	Zfp955a	AI842447+++Zfp883a	mRNA	3	URS00009B4570+++NM_029952+++XM_006525122	coding	known	NC_000083.6	33235538	33255168	-	17|17 B1	77652	NO_INFO	NO_INFO	77652	NA	NO_INFO	NA	NA
791312	791312	Gm9997	0	0	0.02	0	0.02	0	0	0	0.03	0	0.03	0	0	0	1	0	1	0	0.00666667	0.00666667	0.01	0.01	0.333333	0.333333	-0.0119434	0.999812	0.997372	Gm9997	NA	mRNA	1	XM_030247034	coding	known	NC_000078.6	70107218	70113240	+	12 C2|12	791312	NO_INFO	NO_INFO	791312	NA	NO_INFO	NA	NA
114615	114615	Elac1	1.19	1.05	1.07	0.67	0.64	1.03	1.29	1.27	1.41	0.87	0.79	1.29	96	94	99	58	66	90	0.78	1.10333	0.983333	1.32333	71.3333	96.3333	-0.449321	0.547232	0.105747	Elac1	2610018O07Rik+++8430417G19Rik	mRNA	5	URS00009BBD0A+++XR_003952490+++XR_385970+++NM_053255+++XM_030250276	coding	known	NC_000084.6	73735038	73754519	-	18|18 E2	114615	NO_INFO	NO_INFO	114615	NA	NO_INFO	NA	COG1234///NA
71778	71778	Klhl5	5.05	6.27	5.27	4.56	4.75	5.29	5.5	7.6	6.95	5.95	5.88	6.63	227	333	290	245	249	284	4.86667	5.53	6.15333	6.68333	259.333	283.333	-0.124224	0.898543	0.484702	Klhl5	1300013C10Rik	mRNA	5	NM_001347355+++NM_001359401+++NM_175174+++XM_006504134+++XM_006504136	coding	known	NC_000071.6	65107551	65168173	+	5|5 C3.1	71778	NO_INFO	NO_INFO	71778	NA	NO_INFO	Klhl5	NA
67844	67844	Rab32	13	18.53	13.54	13.13	13.59	12.94	14.15	22.46	17.88	17.13	16.82	16.23	365	603	456	436	438	428	13.22	15.0233	16.7267	18.1633	434	474.667	-0.122046	0.897323	0.480631	Rab32	2810011A17Rik+++AU022057	mRNA	1	NM_026405	coding	known	NC_000076.6	10545039	10558207	-	10|10 A1	67844	NO_INFO	NO_INFO	67844	NA	NO_INFO	Rab32	NA
19216	19216	Ptger1	0.03	0.03	0.09	0	0	0.03	0.04	0.04	0.12	0	0	0.04	2	2	3	0	0	1	0.01	0.05	0.0133333	0.0666667	0.333333	2.33333	-2.70724	0.62201	0.14831	Ptger1	EP1+++Ptgerep1	mRNA	2	NM_013641+++XM_006530771	coding	known	NC_000074.6	83666644	83672756	+	8 C2|8 40.22 cM	19216	NO_INFO	NO_INFO	19216	NA	K04258	Ptger1	NA
12581	12581	Cdkn2d	1.39	1.96	2.15	1.71	1.98	2.2	1.51	2.37	2.84	2.23	2.45	2.76	22	36	41	32	36	41	1.96333	1.83333	2.48	2.24	36.3333	33	0.153917	0.952797	0.667277	Cdkn2d	INK4d+++p19+++p19INK4d	mRNA	2	NM_009878+++XM_006509968	coding	known	NC_000075.6	21288459	21291421	-	9|9 A3	12581	NO_INFO	NO_INFO	12581	NA	K06623	Cdkn2d	NA
238247	238247	Arid4a	2.26	2.91	2.76	3.33	2.65	2.81	2.46	3.53	3.64	4.35	3.28	3.52	189	263	285	322	237	257	2.93	2.64333	3.71667	3.21	272	245.667	0.148862	0.865457	0.424823	Arid4a	A630009N03+++A630067N03Rik+++Rbbp1	mRNA	7	URS00009C54A9+++NM_001081195+++XM_006515834+++XM_006515835+++XM_011244105+++XM_011244106+++XM_017315057	coding	known	NC_000078.6	71015081	71099351	+	12|12 C2	238247	NO_INFO	NO_INFO	238247	NA	NO_INFO	NA	NA
16149	16149	Cd74	154.36	443.76	238.75	92.39	97.04	79.17	168.11	537.75	315.2	120.56	120.12	99.28	2438	8197	4558	1723	1768	1490	89.5333	278.957	113.32	340.353	1660.33	5064.33	-1.56127	6.31073e-06	3.03623e-08	Cd74	CLIP+++DHLAG+++HLADG+++Ia-GAMMA+++Ii	mRNA	2	NM_001042605+++NM_010545	coding	known	NC_000084.6	60803849	60812652	+	18 E1|18 34.41 cM	16149	NO_INFO	NO_INFO	16149	NA	K06505	Cd74	NA
69256	69256	Zfp397	2.6	2.25	1.96	1.72	1.93	1.64	2.83	2.73	2.59	2.24	2.39	2.06	221	226	203	172	184	164	1.76333	2.27	2.23	2.71667	173.333	216.667	-0.343005	0.53392	0.100371	Zfp397	2810411K16Rik+++6720480F11Rik+++AI461664	mRNA	5	URS00009B0816+++URS00009BD3E8+++NM_027007+++XM_011246996+++XM_011246997	coding	known	NC_000084.6	23952741	23964671	+	18|18 A2	69256	NO_INFO	NO_INFO	69256	NA	NO_INFO	Zfp397	NA
223669	223669	Zfp7	0.98	0.84	0.75	0.94	0.8	0.7	1.07	1.01	0.99	1.23	1	0.88	36	36	33	45	37	31	0.813333	0.856667	1.03667	1.02333	37.6667	35	0.0848319	0.952797	0.809771	Zfp7	KRAB20+++KRAB7+++Krox-2+++Zfp-7+++Zfp65+++Zfp80+++Zfp86-rs1+++mszf73-2	mRNA	10	NM_001358816+++NM_001358817+++NM_001358818+++NM_145916+++XM_006520797+++XM_017316562+++XM_017316565+++XM_030248495+++XM_030248496+++XM_030248497	coding	known	NC_000081.6	76879253	76892395	+	15 D3|15 36.28 cM	223669	NO_INFO	NO_INFO	223669	NA	K09228	Zfp7	NA
14245	14245	Lpin1	86.48	114.89	101.21	34.82	86.43	132.21	94.19	139.22	133.62	45.43	106.98	165.79	7121	10981	9811	3386	8164	12813	84.4867	100.86	106.067	122.343	8121	9304.33	-0.175954	0.952797	0.745553	Lpin1	Lipin1+++fld	mRNA	21	URS00009B0BA1+++URS00009B17C8+++URS00009B8D72+++NM_001130412+++NM_001355598+++NM_015763+++NM_172950+++XM_006514975+++XM_006514976+++XM_006514977+++XM_006514978+++XM_006514982+++XM_006514983+++XM_006514984+++XM_006514986+++XM_006514987+++XM_011243815+++XM_030246557+++XM_030246558+++XM_030246559+++XM_030246560	coding	known	NC_000078.6	16535669	16653903	+	12 A1.1|12 7.9 cM	14245	NO_INFO	NO_INFO	14245	NA	K15728	Lpin1	NA
18386	18386	Oprd1	0	0	0	0	0.01	0	0	0	0	0	0.02	0	0	0	0	0	1	0	0.00333333	0	0.00666667	0	0.333333	0	0.949827	0.952797	0.815937	Oprd1	DOR+++DOR-1+++Nbor+++mDOR	mRNA	2	NM_013622+++XM_006538628	coding	known	NC_000070.6	132110188	132144486	-	4 D2.3|4 64.78 cM	18386	NO_INFO	NO_INFO	18386	NA	K04213	NA	NA
15469	15469	Prmt1	10.4	12.77	10.54	10.72	11.44	10.54	11.33	15.47	13.91	13.99	14.16	13.21	172	247	212	214	218	209	10.9	11.2367	13.7867	13.57	213.667	210.333	0.0236587	0.980091	0.896091	Prmt1	6720434D09Rik+++AW214366+++Hrmt1l2+++Mrmt1	mRNA	6	NR_045521+++NM_001252476+++NM_001252477+++NM_019830+++XM_030242157+++XM_030242158	coding	known	NC_000073.6	44976755	44986420	-	7 B3|7 29.07 cM	15469	NO_INFO	NO_INFO	15469	NA	K11434	NA	NA
269878	269878	Megf8	0.81	0.88	0.87	1.15	1.04	0.88	0.88	1.06	1.15	1.5	1.28	1.11	123	155	159	207	182	159	1.02333	0.853333	1.29667	1.03	182.667	145.667	0.322276	0.546013	0.105275	Megf8	AW049492+++Egfl4+++b2b1702.2Clo+++b2b1702Clo+++b2b288Clo+++m687Ddg+++mKIAA0817	mRNA	2	XR_003946483+++NM_001160400	coding	known	NC_000073.6	25316738	25365917	+	7|7 A3	269878	NO_INFO	NO_INFO	269878	NA	K23664	NA	NA
56030	56030	Tmem131	5.81	6.87	7.8	9.3	9.24	8.07	6.33	8.32	10.29	12.14	11.43	10.12	569	779	919	1081	1043	936	8.87	6.82667	11.23	8.31333	1020	755.667	0.440657	0.0981913	0.00472536	Tmem131	2610524E03Rik+++CC28+++D1Bwg0491e+++Neg+++RW1+++YR-23+++mKIAA0257	mRNA	8	URS0000811CC9+++URS00009AF02B+++URS00009BD1E5+++URS00009C28CE+++NM_018872+++XM_006496150+++XM_006496152+++XM_017321814	coding	known	NC_000067.6	36792189	36939614	-	1 B|1 15.42 cM	56030	NO_INFO	NO_INFO	56030	NA	NO_INFO	Tmem131	NA
71742	71742	Ulk3	1.72	1.38	1.43	1.73	1.82	1.78	1.87	1.67	1.89	2.25	2.26	2.23	69	64	69	82	84	84	1.77667	1.51	2.24667	1.81	83.3333	67.3333	0.289228	0.761892	0.270836	Ulk3	1200015E14Rik	mRNA	7	XR_001779012+++XR_379456+++XR_379457+++XR_379458+++XR_379459+++XR_870767+++NM_027895	coding	known	NC_000075.6	57589141	57596233	+	9|9 B	71742	NO_INFO	NO_INFO	71742	NA	NO_INFO	NA	NA
217371	217371	Rab40b	0	0.24	0.13	0.1	0.24	0.2	0	0.29	0.18	0.13	0.3	0.25	0	7	4	3	7	6	0.18	0.123333	0.226667	0.156667	5.33333	3.66667	0.621191	0.932118	0.551161	Rab40b	SEC4L+++rar	mRNA	2	URS00009B2D11+++NM_139147	coding	known	NC_000077.6	121356121	121388251	-	11|11 E2	217371	NO_INFO	NO_INFO	217371	NA	NO_INFO	NA	NA
73137	73137	Prrc1	5.14	6.31	6.8	5.92	5.2	5.13	5.6	7.65	8.97	7.73	6.44	6.43	366	519	578	499	426	429	5.41667	6.08333	6.86667	7.40667	451.333	487.667	-0.105251	0.914363	0.513589	Prrc1	1190002C06Rik+++2310058D16Rik+++3110038B19Rik+++9430085A19Rik	mRNA	8	URS00009AF695+++URS00009BCBEF+++NM_028447+++XM_006526287+++XM_006526288+++XM_006526289+++XM_030250617+++XM_030250618	coding	known	NC_000084.6	57354733	57395009	+	18|18 D3	73137	NO_INFO	NO_INFO	73137	NA	NO_INFO	Prrc1	NA
66367	66367	2310022A10Rik	1.86	2.29	2.19	1.97	1.64	1.67	2.03	2.78	2.89	2.57	2.03	2.09	68	92	91	83	62	70	1.76	2.11333	2.23	2.56667	71.6667	83.6667	-0.225469	0.84293	0.369826	2310022A10Rik	NA	mRNA	7	URS00009B66F1+++URS00009C095D+++XR_391092+++NM_001122767+++NM_175107+++XM_006540290+++XM_017312231	coding	known	NC_000073.6	27553243	27585746	+	7|7 A3	66367	NO_INFO	NO_INFO	66367	NA	NO_INFO	NA	NA
12802	12802	Cnr2	0.81	1	1.16	0.74	0.63	0.83	0.88	1.21	1.53	0.97	0.78	1.05	46	66	79	50	41	56	0.733333	0.99	0.933333	1.20667	49	63.6667	-0.36951	0.698676	0.212098	Cnr2	CB-2+++CB2+++CB2-R	mRNA	2	NM_001305278+++NM_009924	coding	known	NC_000070.6	135895189	135920219	+	4|4 D3	12802	NO_INFO	NO_INFO	12802	NA	K04278	NA	NA
77577	77577	Spns3	0.06	0.05	0	0.08	0.16	0	0.07	0.06	0	0.1	0.2	0	1	1	0	2	5	0	0.08	0.0366667	0.1	0.0433333	2.33333	0.666667	1.77468	0.814009	0.337132	Spns3	9830002I17Rik	mRNA	6	XR_388556+++XR_388557+++NM_029932+++XM_006534486+++XM_006534488+++XM_011249311	coding	known	NC_000077.6	72498153	72550509	-	11|11 B4	77577	NO_INFO	NO_INFO	77577	NA	NO_INFO	Spns3	NA
75210	75210	Prr3	4.32	3.31	3.19	3.31	3.36	3.73	4.71	4.01	4.21	4.32	4.16	4.68	114	100	93	106	90	116	3.46667	3.60667	4.38667	4.31	104	102.333	-0.0082226	0.999812	0.975016	Prr3	4930540G07Rik+++Cat56	mRNA	23	XR_001782124+++NM_001165892+++NM_001282012+++NM_001282013+++NM_001282024+++NM_001282025+++NM_145487+++XM_006525060+++XM_006525062+++XM_006525063+++XM_030250122+++rna-NM_001165892.1-2+++rna-NM_001165892.1-3+++rna-NM_001282012.1-2+++rna-NM_001282012.1-3+++rna-NM_001282013.1-2+++rna-NM_001282013.1-3+++rna-NM_001282024.1-2+++rna-NM_001282024.1-3+++rna-NM_001282025.1-2+++rna-NM_001282025.1-3+++rna-NM_…	coding	known	NT_187004.1	2282283	35980063	-	17|17 B1	75210	NO_INFO	NO_INFO	75210	NA	NO_INFO	Prr3	NA
12788	12788	Cnga1	0	0	0	0	0.02	0	0	0	0	0	0.03	0	0	0	0	0	1	0	0.00666667	0	0.01	0	0.333333	0	0.949827	0.952797	0.815937	Cnga1	Cncg	mRNA	2	NM_007723+++XM_006503709	coding	known	NC_000071.6	72603696	72642752	-	5 C3.2|5 38.44 cM	12788	NO_INFO	NO_INFO	12788	NA	K04948	NA	NA
57751	57751	Rnf25	19.61	15.85	14.49	13.73	13.7	12.02	21.36	19.2	19.13	17.92	16.96	15.07	375	351	332	310	300	270	13.15	16.65	16.65	19.8967	293.333	352.667	-0.294718	0.614036	0.143066	Rnf25	0610009H16Rik+++AO7	mRNA	5	URS00009BE9E6+++NM_001305230+++NM_021313+++XM_006496170+++XM_030255695	coding	known	NC_000067.6	74593748	74601397	-	1|1 C4	57751	NO_INFO	NO_INFO	57751	NA	NO_INFO	NA	NA
75292	75292	Prkd3	13.22	16.39	17.4	18.8	15.14	13.91	14.4	19.86	22.97	24.53	18.74	17.44	974	1339	1517	1576	1221	1151	15.95	15.67	20.2367	19.0767	1316	1276.67	0.0473895	0.952797	0.774034	Prkd3	4930557O20Rik+++5730497N19Rik+++PKD3+++Pkcnu+++Prkcn	mRNA	5	URS00009B40A3+++NM_001171004+++NM_001171005+++NM_029239+++XM_030250123	coding	known	NC_000083.6	78949405	79020816	-	17|17 E3	75292	NO_INFO	NO_INFO	75292	NA	K06070	NA	NA
66734	66734	Map1lc3a	55.84	87.04	70.45	82.26	67.94	64.92	60.81	105.47	93	107.35	84.09	81.41	692	1247	1044	1199	959	941	71.7067	71.11	90.95	86.4267	1033	994.333	0.0683296	0.952797	0.69672	Map1lc3a	1010001H21Rik+++4922501H04Rik+++LC3+++LC3a	mRNA	3	NR_046364+++URS00009B0EBD+++NM_025735	coding	known	NC_000068.7	155274636	155278073	+	2|2 H1	66734	NO_INFO	NO_INFO	66734	NA	K10435	Map1lc3a	NA
78796	78796	Zcchc4	2.2	1.58	2.1	1.45	1.53	1.36	2.4	1.91	2.77	1.89	1.9	1.7	76	70	89	68	68	58	1.44667	1.96	1.83	2.36	64.6667	78.3333	-0.291687	0.769721	0.281765	Zcchc4	4930449I23Rik	mRNA	9	URS00009B2229+++XR_001784758+++NM_001308144+++NM_001309445+++NM_030185+++XM_006504189+++XM_006504190+++XM_006504191+++XM_006504192	coding	known	NC_000071.6	52775409	52824666	+	5|5 C1	78796	NO_INFO	NO_INFO	78796	NA	NO_INFO	NA	NA
100129	100129	Gpr153	0.25	0.36	0.22	0.18	0.31	0.24	0.27	0.43	0.29	0.24	0.38	0.3	14	24	15	12	20	16	0.243333	0.276667	0.306667	0.33	16	17.6667	-0.135176	0.952797	0.787567	Gpr153	1110065N12Rik+++AI449320+++PGR1	mRNA	5	URS00009AEF49+++URS00009C19EF+++NM_178406+++XM_011250169+++XM_011250170	coding	known	NC_000070.6	152274106	152285342	+	4|4 E2	100129	NO_INFO	NO_INFO	100129	NA	NO_INFO	Gpr153	NA
108169013	108169013	Gm46894	512.53	496.16	450.56	177.27	126.18	215.97	558.18	601.25	594.83	231.33	156.18	270.82	18698	21295.7	19874.8	7761.2	5307.8	9452.78	173.14	486.417	219.443	584.753	7507.26	19956.1	-1.42823	2.80736e-09	5.3971e-12	Gm46894	NA	mRNA	4	XR_001784570+++XM_017320559+++XM_017320560+++XM_030253972	coding	known	NC_000070.6	134159786	134164375	+	4 D3|4	108169013	NO_INFO	NO_INFO	108169013	NA	NO_INFO	NA	NA
100303744	100303744	Sprr2a2	0.01	0.02	0	0.01	0.01	0	0.01	0.02	0	0.01	0.01	0	0.5	1	0	0.5	0.5	0	0.00666667	0.01	0.00666667	0.01	0.333333	0.5	-0.973727	0.952797	0.811392	Sprr2a2	Sprr2a+++Sprr2a1+++Sprr2a3	mRNA	1	NM_001164787	coding	known	NC_000069.6	92250647	92257304	+	3|3 F1	100303744	NO_INFO	NO_INFO	100303744	NA	NO_INFO	Sprr2a2	NA
101056232	101056232	Gm29804	2.13	0.95	0.68	0.74	0.45	1.06	2.32	1.16	0.9	0.97	0.56	1.33	110.87	57.52	42.45	45.61	27.09	64.95	0.75	1.25333	0.953333	1.46	45.8833	70.28	-0.710711	0.578061	0.124122	Gm29804	NA	mRNA	2	URS00009BFF77+++XM_006538400	coding	known	NC_000070.6	41886744	41893163	+	4 A5|4	101056232	NO_INFO	NO_INFO	101056232	NA	NO_INFO	NA	NA
245020	245020	Slc35g2	0.1	0.08	0.04	0.08	0.08	0	0.1	0.1	0.05	0.11	0.1	0	2	2	2	2	2	0	0.0533333	0.0733333	0.07	0.0833333	1.33333	2	-0.603901	0.952797	0.688314	Slc35g2	Gm519+++Tmem22	mRNA	3	URS00009B5CFB+++NM_001101483+++XM_030244387	coding	known	NC_000075.6	100549125	100571085	+	9|9 E3.3	245020	NO_INFO	NO_INFO	245020	NA	NO_INFO	Slc35g2	NA
68636	68636	Fahd1	59.81	51.82	37.48	49.72	37.31	41.6	65.14	62.8	49.49	64.88	46.18	52.16	1078	1081	809	1057	769	880	42.8767	49.7033	54.4067	59.1433	902	989.333	-0.171259	0.867278	0.427318	Fahd1	1110025H10Rik+++AV002085	mRNA	1	NM_023480	coding	known	NC_000083.6	24848896	24850302	-	17|17 A3.3	68636	NO_INFO	NO_INFO	68636	NA	K01557	NA	COG0179///NA
69556	69556	Bod1	11.42	16.42	16.94	17.1	19.98	16.85	12.44	19.9	22.36	22.32	24.73	21.13	205	341	364	362	410	355	17.9767	14.9267	22.7267	18.2333	375.667	303.333	0.327248	0.500609	0.0843818	Bod1	2310022M17Rik+++BOD2.1+++Bodq1+++Fam44b	mRNA	1	NM_001024919	coding	known	NC_000077.6	31665150	31671862	-	11 A4|11 18.55 cM	69556	NO_INFO	NO_INFO	69556	NA	NO_INFO	NA	NA
235505	235505	Cd109	0	0.02	0	0	0	0	0	0.02	0	0	0	0	0	2	0	0	0	0	0	0.00666667	0	0.00666667	0	0.666667	-1.75753	0.952797	0.664235	Cd109	9930012E15Rik+++AI480638+++GARP	mRNA	5	URS000076AF56+++URS00009B0F4C+++URS00009B746B+++URS00009BB516+++NM_153098	coding	known	NC_000075.6	78615546	78716260	+	9|9 E1	235505	NO_INFO	NO_INFO	235505	NA	NO_INFO	NA	NA
329065	329065	Scd4	0	0	0.02	0	0.06	0	0	0	0.02	0	0.07	0	0	0	0.99	0	3	0	0.02	0.00666667	0.0233333	0.00666667	1	0.33	2.46379	0.897323	0.481189	Scd4	ACOD4	mRNA	1	NM_183216	coding	known	NC_000085.6	44333326	44346743	+	19|19 C3	329065	NO_INFO	NO_INFO	329065	NA	K00507	NA	COG1398///NA
101490	101490	Inpp5f	3.48	3.65	3.58	5.23	3.48	3.84	3.79	4.42	4.72	6.82	4.3	4.82	185	246	300	350	245	291	4.18333	3.57	5.31333	4.31	295.333	243.667	0.280113	0.634166	0.15659	Inpp5f	5830435P03Rik+++AI115354+++AW561896+++SAC2+++cI-27+++hSAC2+++mKIAA0966	mRNA	6	URS00009B06C6+++URS00009B6048+++URS00009BC4FD+++XR_003946368+++NM_001346517+++NM_178641	coding	known	NC_000073.6	128611181	128696436	+	7|7 F3	101490	NO_INFO	NO_INFO	101490	NA	K21798	Inpp5f	NA
109077	109077	Ints5	4.16	4.77	4.38	4.17	4.02	3.95	4.53	5.78	5.78	5.44	4.98	4.96	197	262	249	234	219	221	4.04667	4.43667	5.12667	5.36333	224.667	236	-0.0728818	0.952797	0.670052	Ints5	1110055N21Rik+++mKIAA1698	mRNA	2	URS00009B636A+++NM_176843	coding	known	NC_000085.6	8892987	8897923	+	19|19 A	109077	NO_INFO	NO_INFO	109077	NA	NO_INFO	NA	NA
107321	107321	Lpxn	1.06	1.9	1.47	1.27	1.01	0.79	1.15	2.3	1.94	1.65	1.25	0.99	24	50	40	34	26	21	1.02333	1.47667	1.29667	1.79667	27	38	-0.478124	0.699779	0.213468	Lpxn	4933402K05Rik+++A530083L21Rik+++AV278559+++LDPL	mRNA	7	URS00009B3B1A+++URS00009BEE0F+++NM_001361971+++NM_134152+++XM_030250687+++XM_030250688+++XM_030250689	coding	known	NC_000085.6	12795887	12833813	+	19|19 A	107321	NO_INFO	NO_INFO	107321	NA	NO_INFO	NA	NA
67453	67453	Slc25a46	4.35	4.96	6.81	7.68	8.27	7.54	4.74	6.02	8.99	10.02	10.23	9.45	281	372	528	588	615	575	7.83	5.37333	9.9	6.58333	592.667	393.667	0.603847	0.0492449	0.00170471	Slc25a46	1200007B05Rik+++AI325987	mRNA	3	URS00009C0A52+++NM_001357461+++NM_026165	coding	known	NC_000084.6	31580164	31610532	-	18|18 B1	67453	NO_INFO	NO_INFO	67453	NA	NO_INFO	Slc25a46	NA
18053	18053	Ngfr	0.2	0.84	1.05	1.06	0.97	1.16	0.22	1.02	1.39	1.39	1.2	1.45	10	48	62	62	55	67	1.06333	0.696667	1.34667	0.876667	61.3333	40	0.678539	0.574798	0.122116	Ngfr	LNGFR+++Tnfrsf16+++p75+++p75NGFR+++p75NTR	mRNA	1	NM_033217	coding	known	NC_000077.6	95568818	95587698	-	11 D|11 59.01 cM	18053	NO_INFO	NO_INFO	18053	NA	K02583	Ngfr	NA
13875	13875	Erf	5.64	9.16	10.1	8.18	8.36	9.84	6.14	11.11	13.34	10.67	10.35	12.34	287	536	617	494	492	591	8.79333	8.3	11.12	10.1967	525.667	480	0.160302	0.880047	0.451566	Erf	NA	mRNA	4	NM_010155+++XM_030242128+++XM_030242129+++XM_030242130	coding	known	NC_000073.6	25242560	25251104	-	7 A3|7 13.73 cM	13875	NO_INFO	NO_INFO	13875	NA	NO_INFO	NA	NA
269902	269902	Vmn2r57	0.03	0	0	0.02	0.05	0.05	0.03	0	0	0.03	0.06	0.06	1	0	0	1	2	2	0.04	0.01	0.05	0.01	1.66667	0.333333	2.21341	0.76691	0.276977	Vmn2r57	D430014M15+++EG269902	mRNA	1	NM_177764	coding	known	NC_000073.6	41399732	41448641	-	7|7 B3	269902	NO_INFO	NO_INFO	269902	NA	NO_INFO	NA	NA
78816	78816	Gmip	1.68	1.72	1.6	1.27	1	1.02	1.82	2.08	2.11	1.66	1.24	1.28	94	113	106	85	65	67	1.09667	1.66667	1.39333	2.00333	72.3333	104.333	-0.539251	0.287912	0.0268539	Gmip	5031419I10Rik	mRNA	8	URS00009C3C0F+++XR_003947356+++NM_198101+++XM_006509797+++XM_006509798+++XM_006509799+++XM_030243856+++XM_030243857	coding	known	NC_000074.6	69808298	69821870	+	8|8 B3.3	78816	NO_INFO	NO_INFO	78816	NA	NO_INFO	Gmip	NA
214106	214106	4933430I17Rik	0.04	0	0.02	0.07	0	0.06	0.05	0	0.03	0.09	0	0.07	1	0	1	3	0	2	0.0433333	0.02	0.0533333	0.0266667	1.66667	0.666667	1.25597	0.918685	0.521007	4933430I17Rik	bN189G18.7	mRNA	13	XR_003954905+++NM_001356420+++NM_001356421+++NM_001356422+++NM_177607+++XM_006537736+++XM_006537739+++XM_006537740+++XM_011249971+++XM_030253384+++XM_030253385+++XM_030253386+++XM_030253387	coding	known	NC_000070.6	62525304	62553033	+	4|4 B3	214106	NO_INFO	NO_INFO	214106	NA	NO_INFO	NA	NA
68346	68346	Sirt5	7.01	5.36	7.53	5.99	6.04	6.01	7.64	6.5	9.94	7.82	7.48	7.53	125	115	167	135	127	132	6.01333	6.63333	7.61	8.02667	131.333	135.667	-0.0581123	0.952797	0.799831	Sirt5	0610012J09Rik+++1500032M05Rik+++AV001953	mRNA	11	NM_178848+++XM_006516951+++XM_006516952+++XM_006516953+++XM_006516954+++XM_011244412+++XM_011244413+++XM_030247387+++XM_030247388+++XM_030247389+++XM_030247390	coding	known	NC_000079.6	43365389	43395203	+	13|13 A4	68346	NO_INFO	NO_INFO	68346	NA	K11415	Sirt5	NA
11830	11830	Aqp5	0	0	0	0.08	0	0	0	0	0	0.11	0	0	0	0	0	2	0	0	0.0266667	0	0.0366667	0	0.666667	0	1.80281	0.952797	0.655556	Aqp5	NA	mRNA	1	NM_009701	coding	known	NC_000081.6	99591028	99594829	+	15 F1|15 56.13 cM	11830	NO_INFO	NO_INFO	11830	NA	K09867	Aqp5	NA
79233	79233	Zfp319	1.24	1.68	1.81	1.31	1.38	1.24	1.35	2.04	2.39	1.71	1.71	1.56	72	113	126	90	92	85	1.31	1.57667	1.66	1.92667	89	103.667	-0.207292	0.848144	0.387852	Zfp319	AI225750+++AI413472+++Znf319+++mKIAA1388	mRNA	1	NM_024467	coding	known	NC_000074.6	95326131	95331811	-	8|8 C5	79233	NO_INFO	NO_INFO	79233	NA	NO_INFO	Zfp319	NA
67693	67693	Hypk	146.85	119.47	101.62	95.58	93.2	93.42	159.93	144.78	134.16	124.73	115.35	117.15	813	761	669	615	578	596	94.0667	122.647	119.077	146.29	596.333	747.667	-0.3597	0.446097	0.0662298	Hypk	2310003F16Rik+++HSPC136	mRNA	1	NM_026318	coding	known	NC_000068.7	121457088	121458440	+	2|2 E5	67693	NO_INFO	NO_INFO	67693	NA	NO_INFO	NA	NA
269132	269132	Colgalt2	0.08	0.04	0.07	0.13	0.1	0.16	0.09	0.05	0.09	0.17	0.13	0.2	5	3	5	9	7	11	0.13	0.0633333	0.166667	0.0766667	9	4.33333	1.03023	0.666555	0.181551	Colgalt2	AI427652+++D730024P12+++Glt25d2	mRNA	3	URS00009BFBED+++XR_001784706+++NM_177756	coding	known	NC_000067.6	152399805	152510695	+	1|1 G2	269132	NO_INFO	NO_INFO	269132	NA	K11703	Colgalt2	NA
21936	21936	Tnfrsf18	0.41	0.21	0.69	0.07	0.43	0.56	0.45	0.26	0.91	0.09	0.54	0.71	5	3	10	1	6	8	0.353333	0.436667	0.446667	0.54	5	6	-0.252725	0.952797	0.786445	Tnfrsf18	AITR+++Gitr	mRNA	6	URS0000773665+++URS00009AE4DA+++URS00009B4399+++URS0000AD3889+++NM_009400+++NM_021985	coding	known	NC_000070.6	156025489	156031648	+	4|4 E2	21936	NO_INFO	NO_INFO	21936	NA	K05154	Tnfrsf18	NA
545812	545812	Pilrb2	2.1	3.09	2.03	1.92	2	1.44	2.28	3.75	2.68	2.51	2.47	1.8	32	53	39	36	35	25	1.78667	2.40667	2.26	2.90333	32	41.3333	-0.365598	0.78266	0.301852	Pilrb2	EG545812	mRNA	4	URS0000811803+++XR_868611+++NM_001024932+++XM_006504606	coding	known	NC_000071.6	137865821	137871914	+	5|5 G2	545812	NO_INFO	NO_INFO	545812	NA	K15411	Pilrb2	NA
269823	269823	Pon3	24.26	27.89	25.36	25.2	29.03	24.44	26.43	33.8	33.48	32.88	35.93	30.65	1573	2159	1941	2055	1993	1903	26.2233	25.8367	33.1533	31.2367	1983.67	1891	0.0678694	0.948117	0.596822	Pon3	2810004E20+++AI786302	mRNA	7	URS00009AF2E1+++URS00009B68B6+++NM_001363812+++NM_173006+++XM_006505089+++XM_011241062+++XM_030255426	coding	known	NC_000072.6	5216256	5256285	-	6 A1|6 1.99 cM	269823	NO_INFO	NO_INFO	269823	NA	NO_INFO	Pon3	NA
381404	381404	Pabpc1l	0	0.02	0	0	0.03	0	0	0.03	0	0	0.04	0	0	1	0	0	1	0	0.01	0.00666667	0.0133333	0.01	0.333333	0.333333	-0.0119435	0.999812	0.997374	Pabpc1l	1810053B01Rik+++Epab	mRNA	8	XR_374483+++NM_001114079+++XM_006499825+++XM_006499826+++XM_006499827+++XM_006499828+++XM_006499829+++XM_017319072	coding	known	NC_000068.7	164024770	164050538	+	2|2 H3	381404	NO_INFO	NO_INFO	381404	NA	K13126	Pabpc1l	NA
14156	14156	Fen1	0.95	1.24	1.62	1.43	0.73	1.04	1.03	1.5	2.14	1.86	0.91	1.31	28	46	61	50	30	37	1.06667	1.27	1.36	1.55667	39	45	-0.192609	0.944844	0.58866	Fen1	AW538437+++FEN-1	mRNA	9	URS00009B1D05+++URS00009B4B1E+++URS00009B6F13+++NM_001271614+++NM_001271615+++NM_007999+++XM_006526661+++XM_006526663+++XM_006526664	coding	known	NC_000085.6	10198368	10204393	+	19|19 A	14156	NO_INFO	NO_INFO	14156	NA	K04799	Fen1	COG0258///NA
195018	195018	Zzef1	5.34	6.11	5.52	5.63	6.48	4.79	5.82	7.4	7.29	7.35	8.01	6.01	355	536	622	562	559	458	5.63333	5.65667	7.12333	6.83667	526.333	504.333	0.0755913	0.952797	0.675605	Zzef1	8430405D05Rik+++BC051585+++C130099L13Rik+++C85424+++NSPA+++mKIAA0399	mRNA	8	URS00009B39BB+++NM_001045536+++XM_006532601+++XM_006532602+++XM_006532603+++XM_011248827+++XM_030245704+++rna-NM_001045536.2-2	coding	known	NT_166317.2	1218	72927120	+	11|11 B4	195018	NO_INFO	NO_INFO	195018	NA	NO_INFO	NA	NA
58992	58992	F12	217.26	327.96	326.98	408.63	369.82	330.99	236.61	397.42	431.68	533.26	457.74	415.06	5821	10179	10502	12943	11367	10438	369.813	290.733	468.687	355.237	11582.7	8834	0.410873	0.206111	0.0152235	F12	FXII+++HAF	mRNA	1	NM_021489	coding	known	NC_000079.6	55417958	55426804	-	13|13 B1	58992	NO_INFO	NO_INFO	58992	NA	K01328	NA	NA
73229	73229	Zfp983	0.93	0.98	0.79	0.94	0.98	0.74	1.01	1.18	1.05	1.23	1.22	0.93	61	76	64	75	76	59	0.886667	0.9	1.12667	1.08	70	67	0.0546351	0.962562	0.84007	Zfp983	3110052M02Rik+++mszf57+++mszf71	mRNA	18	URS00009ADA87+++URS00009B70D5+++URS00009B7A86+++URS00009B9845+++URS00009BD15A+++URS00009BF34E+++URS00009C0842+++URS00009C3D23+++URS00009C4F1B+++NM_001166497+++NM_001357098+++XM_017317669+++XM_017317670+++XM_030250066+++XM_030250067+++XM_030250068+++XM_030250069+++XM_030250070	coding	known	NC_000083.6	21650572	21664966	+	17|17 A3.3	73229	NO_INFO	NO_INFO	73229	NA	NO_INFO	NA	NA
207683	207683	Igsf11	2.27	2.35	3.06	3.98	2.86	2.55	2.48	2.84	4.05	5.19	3.54	3.19	112	134	181	232	162	148	3.13	2.56	3.97333	3.12333	180.667	142.333	0.342163	0.628157	0.151498	Igsf11	1700025L02Rik+++BT-IgSF+++Igsf13	mRNA	2	NM_170599+++XM_011245851	coding	known	NC_000082.6	38892476	39027159	+	16|16 B4	207683	NO_INFO	NO_INFO	207683	NA	K06791	Igsf11	NA
105785	105785	Kdelr3	0	0.24	0.18	0.05	0.14	0.38	0	0.29	0.24	0.06	0.18	0.47	0	5	4	1	3	8	0.19	0.14	0.236667	0.176667	4	3	0.500494	0.952797	0.681957	Kdelr3	AI173274	mRNA	1	NM_134090	coding	known	NC_000081.6	79516408	79527739	+	15|15 E1	105785	NO_INFO	NO_INFO	105785	NA	K10949	Kdelr3	NA
18946	18946	Pnliprp1	0	0	0.43	0	0	0	0	0	0.57	0	0	0	0	0	11	0	0	0	0	0.143333	0	0.19	0	3.66667	-4.21708	0.498364	0.083787	Pnliprp1	Plrp1	mRNA	2	URS00009C5D43+++NM_018874	coding	known	NC_000085.6	58728887	58744169	+	19 D2|19 54.49 cM	18946	NO_INFO	NO_INFO	18946	NA	K14074	NA	NA
54343	54343	Atf7ip	2.12	2.89	3.99	3.31	2.23	2.21	2.31	3.51	5.27	4.32	2.76	2.77	202	293	404	338	253	257	2.58333	3	3.28333	3.69667	282.667	299.667	-0.0707593	0.952797	0.74643	Atf7ip	2610204M12Rik+++5830415B17Rik+++AM+++Mcaf1	mRNA	12	URS00009B68A7+++URS00009BB4CC+++URS00009BDCDB+++NM_019426+++XM_006506388+++XM_006506389+++XM_006506390+++XM_006506391+++XM_006506392+++XM_017321681+++XM_030255502+++XM_030255503	coding	known	NC_000072.6	136518789	136610855	+	6|6 G1	54343	NO_INFO	NO_INFO	54343	NA	NO_INFO	Atf7ip	NA
75456	75456	Prps1l1	0	0	0	0	0.04	0	0	0	0	0	0.05	0	0	0	0	0	1	0	0.0133333	0	0.0166667	0	0.333333	0	0.949827	0.952797	0.815937	Prps1l1	1700011K15Rik	mRNA	1	NM_029294	coding	known	NC_000078.6	34984761	34986436	+	12|12 A3	75456	NO_INFO	NO_INFO	75456	NA	K00948	NA	COG0462///NA
14289	14289	Fpr2	0.98	1.01	0.82	0.47	0.64	0.31	1.07	1.22	1.08	0.61	0.8	0.39	16	19	16	9	12	6	0.473333	0.936667	0.6	1.12333	9	17	-0.926855	0.53392	0.100212	Fpr2	E330010I07Rik+++Fpr-rs2	mRNA	2	URS00009BABA5+++NM_008039	coding	known	NC_000083.6	17887824	17893952	+	17|17 A3.2	14289	NO_INFO	NO_INFO	14289	NA	K04173	NA	NA
70646	70646	Naa30	1.89	2.29	2.29	2.39	2.6	2.48	2.06	2.78	3.02	3.12	3.21	3.11	123	174	179	185	195	192	2.49	2.15667	3.14667	2.62	190.667	158.667	0.270515	0.631918	0.155192	Naa30	4930487N19Rik+++5730533P17Rik+++AI447922+++AW322455+++Nat12	mRNA	2	NM_027492+++XM_006519542	coding	known	NC_000080.6	49172246	49190889	+	14|14 C1	70646	NO_INFO	NO_INFO	70646	NA	NO_INFO	NA	COG0454///NA+++COG0456///NA
100041230	100041230	Hist1h4m	2.01	0.35	0.34	0.62	1.11	0	2.19	0.43	0.45	0.81	1.37	0	5	1	1	1.76	3	0	0.576667	0.9	0.726667	1.02333	1.58667	2.33333	-0.921508	0.933596	0.55441	Hist1h4m	Gm11275+++H4c1+++H4c11+++H4c12+++H4c14+++H4c2+++H4c3+++H4c4+++H4c6+++H4c8+++H4c9+++H4f16+++Hist1h4m	mRNA	1	NM_001195421	coding	known	NC_000079.6	21811746	21812150	+	13 A3.1|13	100041230	NO_INFO	NO_INFO	100041230	NA	K11254	NA	NA
69666	69666	Psmg4	34.21	34.19	25.19	28.68	29.31	25.8	37.25	41.43	33.26	37.43	36.28	32.35	146	165	127	141	137	119	27.93	31.1967	35.3533	37.3133	132.333	146	-0.161131	0.897721	0.48244	Psmg4	PAC-4+++mPAC4	mRNA	2	NM_001101430+++NM_001110515	coding	known	NC_000079.6	34162964	34178172	+	13|13 A3.3	69666	NO_INFO	NO_INFO	69666	NA	NO_INFO	NA	NA
26401	26401	Map3k1	1.1	1.14	0.89	1.21	1.08	0.95	1.2	1.38	1.18	1.57	1.33	1.19	112	134	109	140	119	111	1.08	1.04333	1.36333	1.25333	123.333	118.333	0.0451571	0.96299	0.842281	Map3k1	MAPKKK1+++MEKK1+++Mekk	mRNA	3	NM_011945+++XM_017315516+++XM_017315517	coding	known	NC_000079.6	111746428	111818269	-	13 D2.2|13 63.36 cM	26401	NO_INFO	NO_INFO	26401	NA	K04416	NA	NA
60315	60315	Myg1	16.08	16.77	11.94	11.61	11.92	11.34	17.51	20.32	15.76	15.15	14.75	14.21	306	371	274	261	260	252	11.6233	14.93	14.7033	17.8633	257.667	317	-0.315093	0.550818	0.108842	Myg1	0610023A07Rik+++2810433J21Rik+++5830429P19Rik+++AI325965+++Gamm1	mRNA	2	NM_021713+++XM_030248679	coding	known	NC_000081.6	102331709	102338139	+	15|15 F3	60315	NO_INFO	NO_INFO	60315	NA	NO_INFO	Myg1	NA
19058	19058	Ppp3r1	7.35	8.23	10.07	8.9	8.93	9.4	8	9.98	13.3	11.62	11.05	11.79	295	383	485	423	412	445	9.07667	8.55	11.4867	10.4267	426.667	387.667	0.145481	0.856483	0.400697	Ppp3r1	CaNB1+++Cnb1+++MCIP1	mRNA	1	NM_024459	coding	known	NC_000077.6	17159298	17200380	+	11|11 A2	19058	NO_INFO	NO_INFO	19058	NA	K06268	NA	COG5126///NA
60411	60411	Cenpk	0.84	0.46	0.65	0.61	0.8	0.78	0.92	0.56	0.85	0.8	1	0.97	11	9	13	13	14	16	0.73	0.65	0.923333	0.776667	14.3333	11	0.368732	0.910195	0.504288	Cenpk	B130045K24Rik+++BB232189+++C530004N04Rik+++Cenp-K+++Solt+++Solzt	mRNA	7	NR_075088+++URS00009B22FE+++NM_021790+++NM_181061+++XM_006517728+++XM_017315552+++XM_017315553	coding	known	NC_000079.6	104228542	104249622	+	13|13 D1	60411	NO_INFO	NO_INFO	60411	NA	NO_INFO	NA	NA
353025	353025	Caps2	0	0.02	0	0	0	0.05	0	0.03	0	0	0	0.07	0	1	0	0	0	1	0.0166667	0.00666667	0.0233333	0.01	0.333333	0.333333	-0.0119435	0.999812	0.997383	Caps2	D630005B03Rik	mRNA	15	URS00009B4DAC+++URS0000AA91BD+++XR_380413+++NM_001310675+++NM_178278+++XM_006513813+++XM_006513814+++XM_006513815+++XM_006513816+++XM_006513817+++XM_006513818+++XM_006513820+++XM_006513821+++XM_006513822+++XM_011243499	coding	known	NC_000076.6	112163349	112231141	+	10|10 D2	353025	NO_INFO	NO_INFO	353025	NA	NO_INFO	NA	NA
116852	116852	Akr1c20	69.63	66.19	71.83	49.32	63.02	62.52	75.83	80.2	94.82	64.36	78	78.4	1072	1159.93	1316	887	1106	1120	58.2867	69.2167	73.5867	83.6167	1037.67	1182.64	-0.195283	0.745071	0.254456	Akr1c20	2610528B18Rik	mRNA	4	NM_001311132+++XM_006516465+++XM_006516466+++XM_030247130	coding	known	NC_000079.6	4486856	4523354	-	13|13 A1	116852	NO_INFO	NO_INFO	116852	NA	NO_INFO	NA	NA
74252	74252	Armc1	6.01	7.03	6.49	8.03	7.47	7.47	6.54	8.52	8.57	10.48	9.25	9.36	294	402	398	475	426	437	7.65667	6.51	9.69667	7.87667	446	364.667	0.291099	0.406485	0.0534595	Armc1	2310016N05Rik+++2900046P06Rik+++3110009G21Rik+++AA409258+++AW048872+++Arcp+++C330014L16Rik	mRNA	5	URS00009B1D48+++URS00009C130B+++NM_001357689+++NM_028840+++XM_030252846	coding	known	NC_000069.6	19131402	19163095	-	3|3 A2	74252	NO_INFO	NO_INFO	74252	NA	NO_INFO	Armc1	NA
19701	19701	Ren1	0.05	0	0	0.05	0	0	0.06	0	0	0.06	0	0	1	0	0	1	0	0	0.0166667	0.0166667	0.02	0.02	0.333333	0.333333	-0.0119428	0.999812	0.997274	Ren1	D19352+++Ren+++Ren-1+++Ren-A+++Ren1c+++Ren1d+++Rn-1+++Rnr	mRNA	2	NM_031192+++rna-NM_031192.3-2	coding	known	NT_039192.2	129184	133360320	+	1 E4|1 57.91 cM	19701	NO_INFO	NO_INFO	19701	NA	K01380	NA	NA
53598	53598	Dctn3	42.06	41.09	32.87	33.95	38.19	35.16	45.81	49.79	43.4	44.3	47.27	44.1	469	529	438	445	483	458	35.7667	38.6733	45.2233	46.3333	462	478.667	-0.0683366	0.952797	0.703458	Dctn3	p24	mRNA	2	NM_001159565+++NM_016890	coding	known	NC_000070.6	41714798	41723163	-	4|4 A5	53598	NO_INFO	NO_INFO	53598	NA	K10425	NA	NA
66784	66784	Fam187a	0	0	0	0.04	0	0	0	0	0	0.05	0	0	0	0	0	1	0	0	0.0133333	0	0.0166667	0	0.333333	0	0.949827	0.952797	0.815937	Fam187a	4933439F11Rik	mRNA	1	NM_025766	coding	known	NC_000077.6	102885169	102886731	+	11|11 E1	66784	NO_INFO	NO_INFO	66784	NA	NO_INFO	NA	NA
20701	20701	Serpina1b	9474.5	10828.2	11187.2	6687.06	7216.85	7866.31	10318.4	13121.7	14769.3	8726.5	8932.74	9864.25	173405	229389	245204	144389	151097	169027	7256.74	10496.6	9174.5	12736.5	154837	215999	-0.4759	0.0203453	0.000484502	Serpina1b	D12Ucla2+++Dom2+++PI2+++Spi1-2	mRNA	2	NM_009244+++rna-NM_009244.4-2	coding	known	NT_114988.1	65479	103738189	+	12 E|12 52.98 cM	20701	NO_INFO	NO_INFO	20701	NA	K03984	NA	NA
239157	239157	Pnma2	0	0.01	0.01	0	0	0	0	0.02	0.02	0	0	0	0	1	1	0	0	0	0	0.00666667	0	0.0133333	0	0.666667	-1.76501	0.952797	0.628786	Pnma2	A830049P17Rik+++mKIAA0883	mRNA	4	URS00009B80C3+++NM_175498+++XM_006518989+++XM_006518990	coding	known	NC_000080.6	66901589	66920063	+	14|14 D1	239157	NO_INFO	NO_INFO	239157	NA	NO_INFO	NA	NA
209361	209361	Taf3	1.83	2.04	1.65	1.54	1.41	1.24	2	2.48	2.17	2	1.74	1.56	130	168	140	129	115	104	1.39667	1.84	1.76667	2.21667	116	146	-0.340298	0.556724	0.113972	Taf3	140kDa+++4933439M23Rik+++AW539625+++TAF140+++TAFII-140+++TAFII140+++mTAFII140	mRNA	5	URS00009B5550+++URS00009B7A0E+++URS00009BCE62+++URS00009BE19D+++NM_027748	coding	known	NC_000068.7	9914552	10048609	-	2|2 A1	209361	NO_INFO	NO_INFO	209361	NA	K14650	NA	NA
100040531	100040531	Dynlt1f	3.64	4.31	2.45	1.16	2.75	2.7	3.97	5.22	3.24	1.52	3.41	3.38	40.46	50.06	30.2	16.88	30.15	35.67	2.20333	3.46667	2.77	4.14333	27.5667	40.24	-0.57816	0.649529	0.168918	Dynlt1f	100040631+++AGS2+++Dynlt1+++Dynlt1e+++Tctel1+++Tctex-1+++Tctex1	mRNA	4	URS00009B8770+++NM_001166627+++NM_001199948+++XM_017317187	coding	known	NC_000083.6	6646602	6655965	-	17 A1|17	100040531	NO_INFO	NO_INFO	100040531	NA	K10420	Dynlt1f	NA
71923	71923	Borcs6	5.05	7.07	7.11	7.32	6.17	5.07	5.5	8.57	9.39	9.55	7.64	6.35	122	198	206	209	171	144	6.18667	6.41	7.84667	7.82	174.667	175.333	0.00519767	0.999812	0.981021	Borcs6	2310047M10Rik	mRNA	2	URS000076DFA2+++NM_028005	coding	known	NC_000077.6	69057718	69061576	+	11|11 B3	71923	NO_INFO	NO_INFO	71923	NA	NO_INFO	Borcs6	NA
66381	66381	Rnf113a2	7.9	8.06	8.83	10.46	8.55	8.04	8.61	9.76	11.66	13.65	10.59	10.08	139	164	186	217	172	166	9.01667	8.26333	11.44	10.01	185	163	0.176241	0.848072	0.378405	Rnf113a2	2310020H19Rik+++AI426758+++Rnf113a	mRNA	1	NM_025525	coding	known	NC_000078.6	84417200	84418578	+	12|12 D1	66381	NO_INFO	NO_INFO	66381	NA	NO_INFO	NA	NA
235587	235587	Parp3	12.32	16.76	12.28	9.61	8.87	8.01	13.41	20.31	16.21	12.53	10.98	10.05	428	682	528	397	357	325	8.83	13.7867	11.1867	16.6433	359.667	546	-0.5987	0.0240082	0.000597041	Parp3	A930002C11Rik+++ADPRT-3+++ARTD3+++AW990611+++Adprt3+++Adprtl3+++PARP-3+++pADPRT-3	mRNA	6	XR_001778888+++NM_001311150+++NM_145619+++XM_006511718+++XM_006511719+++XM_006511720	coding	known	NC_000075.6	106470322	106476949	-	9|9 F1	235587	NO_INFO	NO_INFO	235587	NA	K10798	Parp3	NA
26425	26425	Nubp1	8.91	10.85	10.08	9.56	9.31	9.48	9.71	13.15	13.31	12.47	11.53	11.89	261	368	354	331	313	327	9.45	9.94667	11.9633	12.0567	323.667	327.667	-0.0151879	0.989091	0.923532	Nubp1	NA	mRNA	2	XR_384565+++NM_011955	coding	known	NC_000082.6	10411884	10424453	+	16 A1|16 5.61 cM	26425	NO_INFO	NO_INFO	26425	NA	NO_INFO	NA	NA
21872	21872	Tjp1	3.14	4.05	5.77	4.65	4.73	4.71	3.42	4.9	7.62	6.07	5.85	5.9	327	488	724	577	567	582	4.69667	4.32	5.94	5.31333	575.333	513	0.188625	0.847862	0.377792	Tjp1	ZO1	mRNA	21	URS00009AD958+++URS00009AFEB0+++URS00009B3CEC+++URS00009BA15A+++URS00009BF8AF+++URS00009C1D98+++URS00009C4016+++URS00009C5E02+++NM_001163574+++NM_009386+++XM_006540778+++XM_006540779+++XM_006540780+++XM_006540781+++XM_006540782+++XM_006540783+++XM_006540784+++XM_006540785+++XM_006540786+++XM_011250843+++XM_030242356	coding	known	NC_000073.6	65296165	65527850	+	7 C|7 35.02 cM	21872	NO_INFO	NO_INFO	21872	NA	K05701	Tjp1	NA
115488807	115488807	LOC115488807	0.04	0.09	0.11	0.06	0.06	0.1	0.04	0.1	0.15	0.08	0.08	0.13	3	8	11	6	6	10	0.0733333	0.08	0.0966667	0.0966667	7.33333	7.33333	0.0363856	0.999812	0.961269	LOC115488807	NA	mRNA	2	URS00009AD360+++XM_030250193	coding	known	NC_000083.6	5487546	5493226	-	17 A1|17	115488807	NO_INFO	NO_INFO	115488807	NA	NO_INFO	NA	NA
320204	320204	Etfbkmt	27.11	35.28	22.74	43.55	39.72	36.31	29.53	42.76	30.03	56.83	49.16	45.54	740	1055	695	1222	1114	1066	39.86	28.3767	50.51	34.1067	1134	830	0.440902	0.216812	0.0166225	Etfbkmt	4833442J19Rik+++AI256744+++ETFB-KMT+++Mettl20	mRNA	14	URS00009B17DC+++URS00009C05C2+++NM_001252094+++NM_001252095+++NM_001252096+++NM_001252097+++NM_177101+++XM_017321637+++XM_030255456+++rna-NM_001252094.1-2+++rna-NM_001252095.1-2+++rna-NM_001252096.1-2+++rna-NM_001252097.1-2+++rna-NM_177101.5-2	coding	known	NT_166305.2	5529462	149151171	+	6|6 G3	320204	NO_INFO	NO_INFO	320204	NA	NO_INFO	NA	NA
14548	14548	Mrps33	50.76	33.68	25.33	30.82	35.06	33.41	55.28	40.82	33.44	40.22	43.39	41.89	633	485	378	453	499	486	33.0967	36.59	41.8333	43.18	479.333	498.667	-0.111053	0.952797	0.671882	Mrps33	AI841153+++CGI-139+++Gdap3+++MRP-S33+++PTD003	mRNA	3	URS00009BF0A6+++NM_001010930+++NM_010270	coding	known	NC_000072.6	39801804	39810936	-	6 B1|6	14548	NO_INFO	NO_INFO	14548	NA	NO_INFO	NA	NA
52570	52570	Ccdc69	0.66	0.47	0.64	0.28	0.48	0.33	0.72	0.57	0.85	0.36	0.59	0.41	12	10	14	6	10	7	0.363333	0.59	0.453333	0.713333	7.66667	12	-0.658462	0.780525	0.298207	Ccdc69	2210021E03Rik+++D11Ertd461e	mRNA	3	XR_003949477+++NM_177471+++XM_011249125	coding	known	NC_000077.6	55049733	55078666	-	11 B1.3|11 32.13 cM	52570	NO_INFO	NO_INFO	52570	NA	NO_INFO	NA	NA
75665	75665	Bicdl1	0.53	0.89	0.72	0.74	0.51	0.43	0.58	1.07	0.95	0.97	0.63	0.54	23	46	40	38	26	23	0.56	0.713333	0.713333	0.866667	29	36.3333	-0.311995	0.864349	0.414887	Bicdl1	2210403N09Rik+++BICDR-1+++Ccdc64	mRNA	13	NR_151598+++NR_151599+++NR_151600+++NR_151601+++NR_151602+++NR_151603+++URS00009AE96C+++XR_003955719+++NM_001080808+++XM_006530487+++XM_006530489+++XM_006530490+++XM_030254874	coding	known	NC_000071.6	115648174	115731844	-	5|5 F	75665	NO_INFO	NO_INFO	75665	NA	NO_INFO	NA	NA
321000	321000	Lrif1	4.99	3.54	2.85	2.98	3.11	2.05	5.44	4.29	3.76	3.88	3.85	2.57	144	138	122	117	127	96	2.71333	3.79333	3.43333	4.49667	113.333	134.667	-0.275002	0.76123	0.269841	Lrif1	2010012G17Rik+++4933421E11Rik+++AI450568	mRNA	12	URS00009BC21B+++XR_003954331+++XR_003954332+++NM_001039478+++NM_001039488+++NM_001286685+++NM_028081+++XM_006501581+++XM_006501584+++XM_011240140+++XM_017319616+++XM_030252644	coding	known	NC_000069.6	106684942	106736577	+	3|3 F2.3	321000	NO_INFO	NO_INFO	321000	NA	NO_INFO	NA	NA
20289	20289	Scx	0.43	0.06	0	0.06	0.13	0	0.47	0.08	0	0.08	0.16	0	6	1	0	1	2	0	0.0633333	0.163333	0.08	0.183333	1	2.33333	-1.39037	0.869338	0.430921	Scx	BB114693+++Bhlha41+++Scl	mRNA	2	NM_198885+++XM_006520660	coding	known	NC_000081.6	76457411	76459468	+	15 D3|15 35.92 cM	20289	NO_INFO	NO_INFO	20289	NA	NO_INFO	Scx	NA
98985	98985	Clp1	6.23	6.59	5.4	5.1	7.22	6.35	6.78	7.98	7.12	6.65	8.93	7.96	155	190	161	150	206	186	6.22333	6.07333	7.84667	7.29333	180.667	168.667	0.0929868	0.952797	0.673214	Clp1	AI462438+++Heab	mRNA	2	NR_156129+++NM_133840	coding	known	NC_000068.7	84723122	84727287	-	2|2 D	98985	NO_INFO	NO_INFO	98985	NA	K14399	NA	NA
69606	69606	Mtfmt	5.31	3.87	4.16	2.15	3.12	3.68	5.78	4.69	5.49	2.81	3.87	4.62	148	125	139	71	100	121	2.98333	4.44667	3.76667	5.32	97.3333	137.333	-0.520853	0.441975	0.0647973	Mtfmt	2310020P08Rik	mRNA	1	NM_027134	coding	known	NC_000075.6	65435782	65453054	+	9|9 C	69606	NO_INFO	NO_INFO	69606	NA	K00604	NA	COG0223///NA
67369	67369	Qpctl	3.78	6.08	5.42	6.55	5.14	5.9	4.12	7.37	7.15	8.55	6.37	7.4	109	203	187	223	170	200	5.86333	5.09333	7.44	6.21333	197.667	166.333	0.264282	0.707317	0.219762	Qpctl	1810019P04Rik+++BB101812+++gQC	mRNA	1	NM_026111	coding	known	NC_000073.6	19140217	19149196	-	7|7 A3	67369	NO_INFO	NO_INFO	67369	NA	NO_INFO	NA	COG2234///NA
235626	235626	Setd2	4.44	4.82	4.82	5.53	4.75	4.71	4.83	5.84	6.36	7.22	5.88	5.91	560	706	731	827	692	704	4.99667	4.69333	6.33667	5.67667	741	665.667	0.150178	0.778825	0.293474	Setd2	4921524K10Rik+++BC031601+++KMT3A	mRNA	9	URS00009AF410+++URS00009BF5F0+++XR_001778892+++XR_001778893+++NM_001081340+++XM_006512088+++XM_006512091+++XM_006512092+++XM_017313351	coding	known	NC_000075.6	110532500	110618633	+	9|9 F2	235626	NO_INFO	NO_INFO	235626	NA	K11423	NA	NA
229782	229782	Slc35a3	5.86	5.44	6.92	8.16	7.37	7.18	6.38	6.59	9.13	10.64	9.12	9	414	442	530	630	588	577	7.57	6.07333	9.58667	7.36667	598.333	462	0.36359	0.25307	0.0211872	Slc35a3	2310050P13Rik	mRNA	8	XR_001783689+++XR_003954320+++NM_001362374+++NM_144902+++XM_006501425+++XM_006501426+++XM_006501427+++XM_030252600	coding	known	NC_000069.6	116669469	116712708	-	3|3 G1	229782	NO_INFO	NO_INFO	229782	NA	NO_INFO	Slc35a3	NA
381884	381884	Slc6a16	0.79	0.23	0.27	0.29	0.76	0.81	0.86	0.27	0.36	0.38	0.94	1.02	36	12	15	16	40	44	0.62	0.43	0.78	0.496667	33.3333	21	0.584773	0.78682	0.30625	Slc6a16	Gm1084	mRNA	5	URS000076922E+++URS00009BB171+++URS00009BB3C5+++URS00009C19D2+++NM_001324535	coding	known	NC_000073.6	45240753	45273607	+	7|7 B3	381884	NO_INFO	NO_INFO	381884	NA	NO_INFO	NA	NA
12123	12123	Hrk	0	0.02	0.03	0.03	0.01	0.03	0	0.03	0.04	0.04	0.01	0.04	0	2	3	3	1	3	0.0233333	0.0166667	0.03	0.0233333	2.33333	1.66667	0.542442	0.952797	0.705232	Hrk	AI838259+++Bid3+++DP5+++harakiri	mRNA	1	NM_007545	coding	known	NC_000071.6	118169764	118189478	+	5|5 F	12123	NO_INFO	NO_INFO	12123	NA	K02512	Hrk	NA
107770	107770	Tm6sf2	26.36	18.87	28.42	24.16	18.06	22.68	28.7	22.87	37.52	31.53	22.36	28.44	491	407	634	531	385	496	21.6333	24.55	27.4433	29.6967	470.667	510.667	-0.138932	0.919468	0.52374	Tm6sf2	NA	mRNA	2	NM_001293795+++NM_181540	coding	known	NC_000074.6	70072924	70080066	+	8|8 B3.3	107770	NO_INFO	NO_INFO	107770	NA	NO_INFO	NA	NA
320407	320407	Klri2	0.11	0.08	0.04	0.01	0.03	0	0.11	0.09	0.06	0.02	0.04	0	6	5	3	1	2	0	0.0133333	0.0766667	0.02	0.0866667	1	4.66667	-2.26404	0.505941	0.0862218	Klri2	A530090P03Rik	mRNA	2	NM_177155+++rna-NM_177155.4-2	coding	known	NT_187002.1	80064	129740484	-	6|6 F3	320407	NO_INFO	NO_INFO	320407	NA	NO_INFO	NA	NA
26390	26390	Mapkbp1	0.76	0.69	0.56	0.56	0.53	0.64	0.83	0.83	0.74	0.73	0.65	0.81	79	83	70	68	63	79	0.576667	0.67	0.73	0.8	70	77.3333	-0.163287	0.931801	0.549703	Mapkbp1	2810483F24Rik+++AW123212+++JNKBP-1+++Jnkbp1+++mKIAA0596	mRNA	7	URS0000762A2C+++URS00009B4754+++URS00009B63DC+++NM_001355293+++NM_011941+++XM_017318653+++XM_030251566	coding	known	NC_000068.7	119972390	120027454	+	2|2 E5	26390	NO_INFO	NO_INFO	26390	NA	NO_INFO	NA	NA
108167848	108167848	Gm12258	0.58	0.54	0.29	0.35	0.44	0.15	0.63	0.66	0.38	0.45	0.55	0.19	35	38	21	25	31	11	0.313333	0.47	0.396667	0.556667	22.3333	31.3333	-0.517971	0.770266	0.28311	Gm12258	NA	mRNA	1	XM_017314865	coding	known	NC_000077.6	58847119	58861957	+	11|11 B1.3	108167848	NO_INFO	NO_INFO	108167848	NA	K09228	Gm12258	NA
72549	72549	Reep4	6.58	5.68	4.66	6.49	5.64	6.15	7.17	6.88	6.16	8.47	6.98	7.72	148	147	125	170	144	160	6.09333	5.64	7.72333	6.73667	158	140	0.148135	0.91495	0.51482	Reep4	2700029E10Rik	mRNA	2	NM_180588+++XM_006519598	coding	known	NC_000080.6	70545223	70548935	+	14|14 D2	72549	NO_INFO	NO_INFO	72549	NA	NO_INFO	Reep4	NA
74039	74039	Nfam1	1.14	1.55	1.66	1.27	0.93	0.85	1.24	1.87	2.19	1.66	1.15	1.07	66	103	115	87	62	58	1.01667	1.45	1.29333	1.76667	69	94.6667	-0.447793	0.528805	0.0971033	Nfam1	4921501M20Rik+++Cnaip	mRNA	6	NM_001271411+++NM_001271412+++NM_001271413+++NM_001271414+++NM_028728+++XM_006521486	coding	known	NC_000081.6	82996736	83033397	-	15|15 E1	74039	NO_INFO	NO_INFO	74039	NA	NO_INFO	NA	NA
66438	66438	Hamp2	1497.1	764.95	2354.77	692.61	622.38	892.73	1630.44	926.98	3108.76	903.85	770.36	1119.47	4435	2590	8234	2347	2022	2989	735.907	1538.94	931.227	1888.73	2452.67	5086.33	-1.06018	0.034047	0.000973376	Hamp2	1810073K19Rik+++HEPC2	mRNA	2	URS00009C6023+++NM_183257	coding	known	NC_000073.6	30916983	30926909	+	7 B1|7 19.27 cM	66438	NO_INFO	NO_INFO	66438	NA	K23106	NA	NA
81003	81003	Trim23	1.21	1.21	1.33	1.4	1.91	1.54	1.32	1.46	1.76	1.83	2.36	1.93	66	78	89	90	119	101	1.61667	1.25	2.04	1.51333	103.333	77.6667	0.412361	0.533043	0.0998213	Trim23	6330516O20Rik+++AI450195+++Arfd1	mRNA	3	URS00009AFF2C+++NM_001361538+++NM_001361539	coding	known	NC_000079.6	104178839	104204418	+	13|13 D1	81003	NO_INFO	NO_INFO	81003	NA	NO_INFO	NA	NA
70466	70466	Ckap2l	0.13	0.17	0.24	0.17	0.29	0.25	0.15	0.21	0.32	0.23	0.36	0.31	6	9	13	8	15	13	0.236667	0.18	0.3	0.226667	12	9.33333	0.382763	0.924444	0.537434	Ckap2l	2010016H04Rik+++2610318C08Rik+++AV070319+++radmis+++rdm	mRNA	5	URS000077532F+++URS00009B4CD7+++NM_181589+++XM_006500158+++XM_030252067	coding	known	NC_000068.7	129246376	129297228	+	2|2 F1	70466	NO_INFO	NO_INFO	70466	NA	NO_INFO	Ckap2l	NA
74098	74098	Czib	21.45	13.78	14.35	10.38	14.08	12.09	23.36	16.69	18.95	13.55	17.43	15.16	390	288	312	223	292	257	12.1833	16.5267	15.38	19.6667	257.333	330	-0.398875	0.55129	0.110429	Czib	0610037L13Rik+++1110008H16Rik	mRNA	6	NM_001347160+++NM_028754+++XM_006503437+++XM_006503439+++XM_006503440+++XM_030253839	coding	known	NC_000070.6	107889785	107897803	+	4|4 C7	74098	NO_INFO	NO_INFO	74098	NA	NO_INFO	NA	NA
217216	217216	BC030867	0.06	0.16	0.05	0.16	0.39	0.16	0.06	0.2	0.07	0.21	0.48	0.2	2	3	1	3	7	4	0.236667	0.09	0.296667	0.11	4.66667	2	1.21946	0.759342	0.267995	BC030867	NA	mRNA	5	NM_153544+++XM_006533040+++XM_017314483+++XM_030245876+++XM_030245878	coding	known	NC_000077.6	102248857	102265183	+	11|11 D	217216	NO_INFO	NO_INFO	217216	NA	NO_INFO	NA	NA
69930	69930	Zfp715	2.84	1.68	1.46	1.76	2.2	2.27	3.09	2.04	1.92	2.29	2.73	2.85	173	119	106	128	156	164	2.07667	1.99333	2.62333	2.35	149.333	132.667	0.118583	0.952797	0.692938	Zfp715	2610041B18Rik+++mszf15	mRNA	8	NM_001357811+++NM_001357812+++NM_027264+++XM_006541182+++XM_006541183+++XM_006541185+++XM_030242976+++XM_030242977	coding	known	NC_000073.6	43296522	43313300	-	7|7 B3	69930	NO_INFO	NO_INFO	69930	NA	K09228	NA	NA
243931	243931	Tshz3	0.16	0.24	0.19	0.24	0.12	0.17	0.18	0.29	0.25	0.31	0.15	0.22	12	21	17	21	10	15	0.176667	0.196667	0.226667	0.24	15.3333	16.6667	-0.118126	0.953675	0.81785	Tshz3	A630038G13Rik+++Tsh3+++Zfp537+++mKIAA1474+++teashirt3	mRNA	11	URS00009B071B+++URS00009B6189+++URS00009B8E61+++URS00009C115F+++NM_172298+++XM_006539961+++XM_006539963+++XM_006539964+++XM_006539965+++XM_006539966+++XM_017322238	coding	known	NC_000073.6	36698118	36773553	+	7|7 B2	243931	NO_INFO	NO_INFO	243931	NA	K09236	Tshz3	NA
102414	102414	Clk3	28.88	24.7	21.43	20.58	21.79	20.05	31.45	29.93	28.3	26.85	26.97	25.14	718	740	673	653	650	634	20.8067	25.0033	26.32	29.8933	645.667	710.333	-0.160495	0.826587	0.350539	Clk3	AI256811	mRNA	6	NM_007713+++XM_006510739+++XM_017313060+++XM_017313061+++XM_030243931+++XM_030243932	coding	known	NC_000075.6	57750709	57766235	-	9|9 B	102414	NO_INFO	NO_INFO	102414	NA	NO_INFO	NA	NA
75785	75785	Klhl24	3.06	3.97	4.89	5.58	5.87	4.84	3.34	4.81	6.46	7.28	7.26	6.07	373	544	665	784	805	675	5.43	3.97333	6.87	4.87	754.667	527.333	0.531261	0.0697027	0.0028443	Klhl24	1110046J11Rik+++4930429H24Rik+++6530402O20Rik+++C85082	mRNA	6	URS00009B3896+++URS00009B4170+++URS00009B6744+++URS00009C2B5F+++NM_029436+++XM_006522687	coding	known	NC_000082.6	20097553	20129226	+	16|16 A3	75785	NO_INFO	NO_INFO	75785	NA	NO_INFO	NA	NA
19183	19183	Psmc3ip	0.09	0.3	0.37	0.53	0.39	0.37	0.1	0.36	0.49	0.69	0.48	0.46	1	4	5	7	5	5	0.43	0.253333	0.543333	0.316667	5.66667	3.33333	0.798896	0.853076	0.394233	Psmc3ip	C79099+++GT198+++HOP2+++Tbpip	mRNA	3	NM_008949+++XM_006532524+++XM_030245675	coding	known	NC_000077.6	101092141	101095435	-	11|11 D	19183	NO_INFO	NO_INFO	19183	NA	NO_INFO	Psmc3ip	NA
70227	70227	Zfp619	0.12	0.14	0.16	0.14	0.17	0.18	0.13	0.16	0.21	0.19	0.21	0.23	11	14	17	15	17	19	0.163333	0.14	0.21	0.166667	17	14	0.284236	0.938832	0.568624	Zfp619	3000002G13Rik	mRNA	2	URS00009B0E95+++NM_001004139	coding	known	NC_000073.6	39517766	39540415	+	7|7 B3	70227	NO_INFO	NO_INFO	70227	NA	K09228	NA	NA
227210	227210	Ccnyl1	1.54	1.56	1.62	1.42	2.14	2.16	1.68	1.89	2.14	1.85	2.65	2.71	62	74	81	70	100	104	1.90667	1.57333	2.40333	1.90333	91.3333	72.3333	0.337513	0.699779	0.213456	Ccnyl1	9630037P07Rik+++AW554339	mRNA	4	URS00009B97D2+++NM_001097644+++XM_006495953+++XM_011238499	coding	known	NC_000067.6	64691041	64725646	+	1|1 C2	227210	NO_INFO	NO_INFO	227210	NA	NO_INFO	NA	NA
21418	21418	Tfap2a	0	0	0.02	0	0.02	0	0	0	0.02	0	0.02	0	0	0	1	0	1	0	0.00666667	0.00666667	0.00666667	0.00666667	0.333333	0.333333	-0.0119434	0.999812	0.997372	Tfap2a	AP-2+++AP2alpha+++Ap-2 (a)+++Ap2+++Ap2tf+++Tcfap2a	mRNA	10	URS00009C3501+++URS0000BCF651+++URS0000BD28EB+++NM_001122948+++NM_001301674+++NM_011547+++XM_006516902+++XM_006516903+++XM_017315479+++XM_030247224	coding	known	NC_000079.6	40713802	40739021	+	13 A3.3|13 20.01 cM	21418	NO_INFO	NO_INFO	21418	NA	NO_INFO	Tfap2a	NA
75695	75695	Rilpl1	1.8	2	1.92	2.36	2.04	1.8	1.96	2.42	2.54	3.08	2.53	2.26	56	72	70	87	73	66	2.06667	1.90667	2.62333	2.30667	75.3333	66	0.18601	0.895449	0.475267	Rilpl1	2900002H16Rik+++6330559I19Rik+++GOSPEL	mRNA	6	URS00009B2B65+++NM_021430+++XM_006530491+++XM_006530492+++XM_011248245+++XM_011248246	coding	known	NC_000071.6	124493080	124532496	+	5|5 F	75695	NO_INFO	NO_INFO	75695	NA	NO_INFO	Rilpl1	NA
100039707	100039707	Mthfsl	50.89	35.18	40.03	41.11	46.35	47.24	55.42	42.63	52.85	53.65	57.37	59.23	489.91	386.6	441.53	461.75	488.71	508.14	44.9	42.0333	56.75	50.3	486.2	439.347	0.112432	0.947851	0.596123	Mthfsl	Gm2382	mRNA	10	URS00009C5C89+++XR_379391+++XR_870748+++XR_870749+++XR_870750+++NM_001128601+++NM_001359992+++XM_006510728+++XM_006510730+++XM_011242646	coding	known	NC_000075.6	88682932	88720320	-	9 E3.1|9	100039707	NO_INFO	NO_INFO	100039707	NA	K01934	NA	COG0212///NA
22242	22242	Umod	0	0	0	0.02	0.02	0	0	0	0	0.03	0.03	0	0	0	0	1	1	0	0.0133333	0	0.02	0	0.666667	0	1.84118	0.94991	0.604724	Umod	THP+++Urehd1+++urehr4	mRNA	3	URS0000A7F4E8+++NM_001278605+++NM_009470	coding	known	NC_000073.6	119462708	119479262	+	7 F2|7 63.88 cM	22242	NO_INFO	NO_INFO	22242	NA	NO_INFO	NA	NA
245368	245368	Zfp300	0.07	0.12	0.16	0.08	0.15	0.1	0.07	0.15	0.21	0.11	0.19	0.13	6	13	16.99	9	16	11	0.11	0.116667	0.143333	0.143333	12	11.9967	0.0723996	0.981735	0.903775	Zfp300	D930016N04Rik	mRNA	3	NM_001358840+++NM_183185+++XM_006527628	coding	known	NC_000086.7	21078208	21089698	-	X|X A1.3	245368	NO_INFO	NO_INFO	245368	NA	K09228	NA	NA
671650	671650	Gm20783	0.04	0.04	0	0.03	0.03	0.07	0.04	0.05	0	0.04	0.04	0.09	3.89	4.78	0	3.82	3.83	8.85	0.0433333	0.0266667	0.0566667	0.03	5.5	2.89	0.968529	0.857601	0.404101	Gm20783	NA	mRNA	2	XM_017319036+++XM_030244774	coding	known	NC_000075.6	124423546	124434090	-	9|9 F4	671650	NO_INFO	NO_INFO	671650	NA	NO_INFO	NA	NA
666765	666765	Gm8279	0	0	0.02	0	0	0.02	0	0	0.03	0	0	0.03	0	0	1	0	0	1	0.00666667	0.00666667	0.01	0.01	0.333333	0.333333	-0.0119435	0.999812	0.99738	Gm8279	Gm10412	mRNA	1	XM_030248153	coding	known	NC_000080.6	5131582	5136704	+	14 A2|14	666765	NO_INFO	NO_INFO	666765	NA	NO_INFO	NA	NA
67154	67154	Mtdh	10.13	10.54	9.92	12.78	10.02	9.75	11.03	12.77	13.1	16.68	12.4	12.23	723	871	848	1080	822	820	10.85	10.1967	13.77	12.3	907.333	814	0.144622	0.836915	0.362982	Mtdh	2610103J23Rik+++3D3+++3D3/Lyric+++AEG-1+++AV353288+++D8Bwg1112e+++Lyric	mRNA	17	URS00009AFF22+++URS00009B1310+++URS00009B72A5+++URS00009BCA43+++URS00009BEE63+++URS00009BF271+++NM_001357925+++NM_001357926+++NM_026002+++XM_006520149+++XM_006520151+++XM_006520152+++XM_017316728+++XM_017316729+++XM_017316730+++XM_017316731+++XM_030248710	coding	known	NC_000081.6	34082442	34143595	+	15 B3.1|15 13.98 cM	67154	NO_INFO	NO_INFO	67154	NA	NO_INFO	NA	NA
234857	234857	Spire2	0.03	0.03	0.08	0.05	0	0	0.03	0.03	0.1	0.07	0	0	1	1	3	2	0	0	0.0166667	0.0466667	0.0233333	0.0533333	0.666667	1.66667	-1.32808	0.908562	0.500287	Spire2	BC026502+++Spir-2+++Spir2	mRNA	2	URS00009B32BD+++NM_172287	coding	known	NC_000074.6	123332713	123369518	+	8|8 E1	234857	NO_INFO	NO_INFO	234857	NA	K02098	Spire2	NA
21406	21406	Tcf12	2.9	3.27	3.74	3.83	3.46	3.3	3.15	3.96	4.94	5	4.28	4.14	176	248	311	310	263	270	3.53	3.30333	4.47333	4.01667	281	245	0.207212	0.768693	0.279715	Tcf12	A130037E08Rik+++ALF1+++HEB+++HEBAlt+++HTF-4+++HTF4+++ME1+++REB+++bHLHb20	mRNA	36	URS00009AD5F6+++URS00009AEC9E+++URS00009AEE97+++URS00009AFA08+++URS00009B019E+++URS00009B071C+++URS00009B2B10+++URS00009B77B0+++URS00009BA0FB+++URS00009BB15C+++URS00009BDA8E+++URS00009C04C4+++URS00009C0652+++URS00009C284E+++URS00009C28AD+++URS00009C393D+++URS00009C4A4D+++URS00009C55F5+++NM_001253862+++NM_001253863+++NM_001253864+++NM_001253865+++NM_011544+++XM_006510994+++XM_006510995+++XM_006510…	coding	known	NC_000075.6	71844252	72111893	-	9 D|9 39.85 cM	21406	NO_INFO	NO_INFO	21406	NA	NO_INFO	Tcf12	NA
14397	14397	Gabra4	0	0.02	0	0	0	0	0	0.02	0	0	0	0	0	1	0	0	0	0	0	0.00666667	0	0.00666667	0	0.333333	-0.973727	0.952797	0.811392	Gabra4	Gabra-4	mRNA	9	NM_001359041+++NM_001359043+++NM_001359044+++NM_001359045+++NM_001359046+++NM_001359047+++NM_001359048+++NM_001359050+++NM_010251	coding	known	NC_000071.6	71569734	71658308	-	5|5 C3.2	14397	NO_INFO	NO_INFO	14397	NA	K05175	NA	NA
381157	381157	Greb1l	0.03	0.04	0.04	0.02	0.01	0.04	0.03	0.05	0.05	0.02	0.01	0.05	4	6	6	2	1	6	0.0233333	0.0366667	0.0266667	0.0433333	3	5.33333	-0.822854	0.861761	0.410461	Greb1l	mKIAA4095	mRNA	9	URS00009B094A+++URS00009B5A0B+++URS00009B5B8B+++URS00009BC3A0+++NM_001083628+++XM_006526068+++XM_006526069+++XM_011246970+++XM_030250521	coding	known	NC_000084.6	10324933	10562945	+	18|18 A1	381157	NO_INFO	NO_INFO	381157	NA	NO_INFO	Greb1l	NA
12827	12827	Col4a2	2.33	3.1	3.13	3.58	3.3	2.29	2.54	3.76	4.13	4.67	4.09	2.87	225	347	362	409	367	261	3.05667	2.85333	3.87667	3.47667	345.667	311.333	0.160327	0.875847	0.441718	Col4a2	Col4a-2	mRNA	3	URS000078918C+++URS00009B4ADB+++NM_009932	coding	known	NC_000074.6	11312805	11449287	+	8 A1.1|8 5.62 cM	12827	NO_INFO	NO_INFO	12827	NA	K06237	Col4a2	NA
67097	67097	Rps10	706.61	792.15	634.92	602.85	617.04	682.2	769.55	959.94	838.22	786.71	763.75	855.47	3745	4809	3901	3678	3622	4020	634.03	711.227	801.977	855.903	3773.33	4151.67	-0.14725	0.801981	0.323092	Rps10	2210402A09Rik	mRNA	4	NM_001364934+++NM_025963+++rna-NM_001364934.1-2+++rna-NM_025963.4-2	coding	known	NT_187005.1	320358	27635244	-	17|17 A3.3	67097	NO_INFO	NO_INFO	67097	NA	K02947	Rps10	NA
14866	14866	Gstm5	21.24	12.93	13.23	11.16	14.6	13.05	23.13	15.67	17.47	14.56	18.07	16.37	219	154	163	135	171	157	12.9367	15.8	16.3333	18.7567	154.333	178.667	-0.255059	0.826652	0.350812	Gstm5	NA	mRNA	1	NM_010360	coding	known	NC_000069.6	107895854	107898685	+	3|3 F2.3	14866	NO_INFO	NO_INFO	14866	NA	K00799	Gstm5	COG0625///NA
433586	433586	Maml3	0.09	0.28	0.31	0.43	0.31	0.25	0.1	0.34	0.41	0.56	0.39	0.32	10	32	36	51	36	32	0.33	0.226667	0.423333	0.283333	39.6667	26	0.645484	0.594409	0.132926	Maml3	AV234550+++BC049812+++Mam-2+++mKIAA1816	mRNA	20	URS0000811CD9+++URS0000811ECF+++URS00009ACFDC+++URS00009ADCD9+++URS00009AE17A+++URS00009B08A2+++URS00009B12B5+++URS00009B3F5B+++URS00009B3F89+++URS00009B563B+++URS00009B7D33+++URS00009B97D5+++URS00009BE9CD+++URS00009BE9D0+++URS00009C0BCA+++URS00009C17E4+++URS00009C23EB+++URS00009C494C+++NM_001004176+++XM_006501645	coding	known	NC_000069.6	51685913	52105319	+	3|3 C	433586	NO_INFO	NO_INFO	433586	NA	K06061	Maml3	NA
66977	66977	Nuf2	0.06	0.28	0.25	0.03	0.15	0.08	0.06	0.34	0.33	0.03	0.19	0.1	2	11	10	1	6	3	0.0866667	0.196667	0.106667	0.243333	3.33333	7.66667	-1.1314	0.728694	0.239102	Nuf2	2410003C07Rik+++AU044112+++C85691+++Cdca1+++NUF2R	mRNA	2	NM_001355159+++NM_023284	coding	known	NC_000067.6	169497934	169531464	-	1|1 H2.3	66977	NO_INFO	NO_INFO	66977	NA	NO_INFO	Nuf2	NA
333315	333315	Frem3	0	0.01	0	0.01	0	0.02	0	0.01	0	0.01	0	0.02	0	1	0	1	0	2	0.01	0.00333333	0.01	0.00333333	1	0.333333	1.46264	0.938832	0.568658	Frem3	Gm795+++NV2	mRNA	1	NM_001167898	coding	known	NC_000074.6	80611039	80695557	+	8|8 C2	333315	NO_INFO	NO_INFO	333315	NA	NO_INFO	NA	NA
57783	57783	Tnip1	3.06	4.82	4.67	3.55	3.35	2.8	3.33	5.84	6.16	4.64	4.15	3.51	113	209	213	157	145	125	3.23333	4.18333	4.1	5.11	142.333	178.333	-0.305516	0.658639	0.176186	Tnip1	ABIN+++ABIN-1+++ABIN1+++AU018810+++Naf1+++Nef+++VAN	mRNA	16	URS00009BEC79+++NM_001199275+++NM_001199276+++NM_001271455+++NM_001271456+++NM_021327+++XM_006533846+++XM_006533847+++XM_006533848+++XM_011249162+++XM_011249163+++XM_011249164+++XM_030246196+++XM_030246197+++XM_030246198+++XM_030246199	coding	known	NC_000077.6	54910787	54962956	-	11|11 B1.3	57783	NO_INFO	NO_INFO	57783	NA	K23829	NA	NA
16772	16772	Lama1	0.25	0.34	0.51	0.46	0.41	0.49	0.28	0.41	0.67	0.6	0.51	0.61	36	56	88	77	68	82	0.453333	0.366667	0.573333	0.453333	75.6667	60	0.355558	0.739626	0.24853	Lama1	AA408497+++Lama	mRNA	6	URS00009B5240+++NM_008480+++XM_006523717+++XM_006523718+++XM_030249517+++XM_030249518	coding	known	NC_000083.6	67697127	67822645	+	17 E1.1|17 38.8 cM	16772	NO_INFO	NO_INFO	16772	NA	K05637	NA	NA
77057	77057	Ston1	1.66	2.11	2.69	1.83	1.57	2.1	1.81	2.56	3.55	2.39	1.95	2.63	116	173	217	150	122	171	1.83333	2.15333	2.32333	2.64	147.667	168.667	-0.178258	0.875847	0.442255	Ston1	4921524J06Rik+++C86231+++Salf+++Sblf	mRNA	6	URS00009AF3A0+++URS00009B4AEE+++NM_029858+++XM_006525111+++XM_006525112+++XM_006525113	coding	known	NC_000083.6	88597615	88647865	+	17|17 E4	77057	NO_INFO	NO_INFO	77057	NA	NO_INFO	NA	NA
319178	319178	H2bc3	0	0	0	0.23	0.24	0	0	0	0	0.3	0.3	0	0	0	0	1	1	0	0.156667	0	0.2	0	0.666667	0	1.84118	0.94991	0.604724	H2bc3	H2b-143+++Hist1h2bb	mRNA	1	NM_175664	coding	known	NC_000079.6	23746734	23747223	+	13|13 A3.1	319178	NO_INFO	NO_INFO	319178	NA	K11252	NA	NA
100043381	100043381	Gm14308	0.81	1.43	0.63	0.83	1.15	1.26	0.88	1.73	0.83	1.08	1.42	1.58	60.14	130.26	58.29	79.5	105.07	118.39	1.08	0.956667	1.36	1.14667	100.987	82.8967	0.300408	0.835777	0.36173	Gm14308	NA	mRNA	5	NM_001099349+++XM_030245965+++XM_030245967+++XM_030245968+++XM_030245971	coding	known	NC_000068.7	176619933	176636423	-	2 H4|2	100043381	NO_INFO	NO_INFO	100043381	NA	K09228	NA	NA
216198	216198	Tcp11l2	5.71	7.4	8.25	8.41	8.07	6.59	6.22	8.97	10.89	10.97	9.98	8.27	191	287	331	333	310	260	7.69	7.12	9.74	8.69333	301	269.667	0.17014	0.846741	0.376618	Tcp11l2	E430026E19Rik	mRNA	3	URS00009B6FAC+++URS00009BE69A+++NM_146008	coding	known	NC_000076.6	84575909	84614355	+	10|10 C1	216198	NO_INFO	NO_INFO	216198	NA	NO_INFO	Tcp11l2	NA
12773	12773	Ccr4	0	0	0	0	0.02	0	0	0	0	0	0.03	0	0	0	0	0	1	0	0.00666667	0	0.01	0	0.333333	0	0.949827	0.952797	0.815937	Ccr4	C-C CKR-4+++CHEMR1+++Cmkbr4+++LESTR+++Sdf1r	mRNA	5	NM_009916+++XM_006511932+++XM_006511933+++XM_006511934+++XM_011242933	coding	known	NC_000075.6	114490316	114505476	-	9 F3|9 64.49 cM	12773	NO_INFO	NO_INFO	12773	NA	K04179	Ccr4	NA
27393	27393	Mrpl39	45.33	38.75	27.75	30.88	28.2	33.2	49.37	46.96	36.63	40.3	34.9	41.63	913.62	940.71	708.59	792.69	724.44	865.75	30.76	37.2767	38.9433	44.32	794.293	854.307	-0.136324	0.910487	0.505941	Mrpl39	C21orf8+++MRP-L5+++ORF22+++Rpml5	mRNA	5	NM_017404+++XM_017317023+++XM_017317024+++XM_017317025+++XM_030249143	coding	known	NC_000082.6	84717580	84735383	-	16|16 C3.3	27393	NO_INFO	NO_INFO	27393	NA	NO_INFO	Mrpl39	NA
16333	16333	Ins1	0	0	0.15	0	0	0	0	0	0.2	0	0	0	0	0	1	0	0	0	0	0.05	0	0.0666667	0	0.333333	-0.973727	0.952797	0.811392	Ins1	Ins-1+++Ins2-rs1	mRNA	1	NM_008386	coding	known	NC_000085.6	52264297	52265015	+	19 D2|19 46.76 cM	16333	NO_INFO	NO_INFO	16333	NA	K04526	Ins1	NA
102634078	102634078	LOC102634078	0.71	0.86	0.41	0.48	0.37	0.42	0.77	1.04	0.55	0.63	0.46	0.53	20	28	14	16	12	14	0.423333	0.66	0.54	0.786667	14	20.6667	-0.577438	0.740636	0.250186	LOC102634078	NA	mRNA	3	URS00009BC672+++URS00009C5491+++XM_017316813	coding	known	NC_000081.6	8435112	8450300	+	15 A1	102634078	NO_INFO	NO_INFO	102634078	NA	NO_INFO	NA	NA
27632	27632	Nelfe	15.03	19.55	19.04	14.38	13.02	12.38	16.37	23.69	25.13	18.77	16.11	15.53	276	418	427	320	277	271	13.26	17.8733	16.8033	21.73	289.333	373.667	-0.36118	0.320978	0.0333202	Nelfe	D17H6S45+++NELF-E+++RD+++Rdbp	mRNA	12	NM_001045863+++NM_001045864+++NM_138580+++rna-NM_001045863.1-2+++rna-NM_001045863.1-3+++rna-NM_001045863.1-4+++rna-NM_001045864.1-2+++rna-NM_001045864.1-3+++rna-NM_001045864.1-4+++rna-NM_138580.2-2+++rna-NM_138580.2-3+++rna-NM_138580.2-4	coding	known	NT_187004.1	1099164	34856372	+	17 B1|17 18.4 cM	27632	NO_INFO	NO_INFO	27632	NA	NO_INFO	NA	NA
109264	109264	Me3	1.66	0.81	0.83	0.86	0.93	0.72	1.81	0.98	1.1	1.13	1.15	0.9	70.41	41	42.04	43.07	45	36.06	0.836667	1.1	1.06	1.29667	41.3767	51.15	-0.36095	0.823705	0.346101	Me3	1700020C08Rik+++B230207H15Rik	mRNA	12	URS00009B49D7+++URS00009BB5D0+++URS00009BC2D7+++URS0000A8F324+++XR_003946371+++NM_181407+++XM_006507189+++XM_006507190+++XM_006507192+++XM_006507194+++XM_017321926+++XM_017321927	coding	known	NC_000073.6	89632097	89854359	+	7|7 D3	109264	NO_INFO	NO_INFO	109264	NA	K00029	Me3	COG0280///NA+++COG0281///NA
52850	52850	Sgsm1	0.58	0.65	0.59	0.47	0.14	0.41	0.63	0.78	0.78	0.62	0.17	0.52	28	38	41	25	8	24	0.34	0.606667	0.436667	0.73	19	35.6667	-0.912333	0.366317	0.0430721	Sgsm1	2410098H20Rik+++AA408781+++D5Bwg1524e+++E130107M15+++NuIP+++Rutbc2	mRNA	6	NM_001162965+++NM_001254731+++NM_001309526+++NM_001309528+++NM_172718+++XM_006535122	coding	known	NC_000071.6	113243220	113310788	-	5 F|5 55.45 cM	52850	NO_INFO	NO_INFO	52850	NA	NO_INFO	Sgsm1	NA
102920	102920	Cenpi	0.11	0.05	0.04	0.04	0.02	0.09	0.12	0.07	0.05	0.05	0.02	0.11	5	3	2	2	1	5	0.05	0.0666667	0.06	0.08	2.66667	3.33333	-0.380572	0.952797	0.740325	Cenpi	CENP-I+++Fshprh1	mRNA	5	URS00009B02AB+++NM_001305631+++NM_145924+++XM_006528477+++XM_017318340	coding	known	NC_000086.7	134308084	134363980	+	X|X E3	102920	NO_INFO	NO_INFO	102920	NA	NO_INFO	NA	NA
15452	15452	Hprt	27.45	25.39	23.71	21.5	26.11	24.34	29.9	30.76	31.3	28.05	32.32	30.52	470	503	486	434	511	489	23.9833	25.5167	30.2967	30.6533	478	486.333	-0.0394751	0.955693	0.822518	Hprt	C81579+++HPGRT+++Hprt1	mRNA	1	NM_013556	coding	known	NC_000086.7	52988078	53021660	+	X A5|X 29.31 cM	15452	NO_INFO	NO_INFO	15452	NA	K00760	NA	COG0634///NA
239647	239647	Pced1b	1.27	1.31	1.65	1.45	1.09	1.17	1.39	1.59	2.18	1.89	1.35	1.47	48	59	67	65	42	48	1.23667	1.41	1.57	1.72	51.6667	58	-0.172246	0.938322	0.563336	Pced1b	Fam113b	mRNA	12	NM_172293+++XM_006520963+++XM_006520964+++XM_006520965+++XM_006520967+++XM_006520968+++XM_011245624+++XM_011245625+++XM_011245626+++XM_030248561+++XM_030248562+++XM_030248563	coding	known	NC_000081.6	97246973	97385693	+	15|15 F1	239647	NO_INFO	NO_INFO	239647	NA	NO_INFO	Pced1b	NA
67247	67247	2024-03-02	186.48	214.74	212.59	215.93	225.46	211.19	203.09	260.22	280.66	281.79	279.07	264.83	4916	6564	6720	6736	6825	6552	217.527	204.603	275.23	247.99	6704.33	6066.67	0.146454	0.710303	0.222779	2024-03-02	2810484M10Rik+++Marc2+++Mosc2+++mARC1	mRNA	3	NM_001368285+++NM_001368286+++NM_133684	coding	known	NC_000067.6	184813066	184846451	-	1|1 H5	67247	NO_INFO	NO_INFO	67247	NA	NO_INFO	NA	NA
12768	12768	Ccr1	0.05	0.19	0.02	0.06	0.11	0.02	0.05	0.23	0.03	0.08	0.13	0.03	2	9	1	3	5	1	0.0633333	0.0866667	0.08	0.103333	3	4	-0.378411	0.952797	0.7459	Ccr1	Cmkbr1+++Mip-1a-R	mRNA	1	NM_009912	coding	known	NC_000075.6	123962126	123968692	-	9 F4|9 75.05 cM	12768	NO_INFO	NO_INFO	12768	NA	K04176	Ccr1	NA
12224	12224	Klf5	0	0.15	0	0	0.04	0.04	0	0.18	0	0	0.05	0.05	0	4	0	0	1	1	0.0266667	0.05	0.0333333	0.06	0.666667	1.33333	-0.895364	0.952797	0.698832	Klf5	4930520J07Rik+++Bteb2+++CKLF+++IKLF	mRNA	4	URS00009AE9D3+++URS00009B40C9+++URS00009BC8C0+++NM_009769	coding	known	NC_000080.6	99298682	99313412	+	14|14 E2.2	12224	NO_INFO	NO_INFO	12224	NA	K09206	Klf5	NA
26381	26381	Esrrg	0.21	0.07	0.18	0.11	0.12	0.08	0.23	0.08	0.24	0.14	0.15	0.1	16	6	17	10	11	7	0.103333	0.153333	0.13	0.183333	9.33333	13	-0.517447	0.865457	0.423073	Esrrg	ERR3+++Errg+++NR3B3+++mKIAA0832	mRNA	21	URS00009AD42F+++URS00009B7E94+++URS00009BCEAF+++URS00009BD288+++URS00009BEAE4+++URS00009C20EE+++NM_001243792+++NM_001357534+++NM_001357535+++NM_001357536+++NM_011935+++XM_006497165+++XM_006497170+++XM_011238915+++XM_011238916+++XM_011238917+++XM_011238918+++XM_011238919+++XM_011238920+++XM_030254422+++XM_030254424	coding	known	NC_000067.6	187608510	188214885	+	1|1 H5- H6	26381	NO_INFO	NO_INFO	26381	NA	NO_INFO	Esrrg	NA
216453	216453	Rdh19	0.08	0	0	0	0	0.03	0.09	0	0	0	0	0.04	2	0	0	0	0	1	0.01	0.0266667	0.0133333	0.03	0.333333	0.666667	-1.10591	0.952797	0.71442	Rdh19	RDH-S+++RDH-S2+++Rdhs	mRNA	1	NM_147222	coding	known	NC_000076.6	127849928	127861176	+	10 D3|10 76.27 cM	216453	NO_INFO	NO_INFO	216453	NA	K11154	NA	NA
22412	22412	Wnt9b	0.2	0.08	0.19	0.15	0.09	0.1	0.21	0.09	0.25	0.2	0.11	0.13	13	6	15	12	7	8	0.113333	0.156667	0.146667	0.183333	9	11.3333	-0.368527	0.940099	0.572931	Wnt9b	Wnt14b+++Wnt15+++clf+++clf1+++wnt-14b+++wnt-15	mRNA	2	NM_011719+++XM_030245931	coding	known	NC_000077.6	103727362	103775272	-	11 E1|11 67.47 cM	22412	NO_INFO	NO_INFO	22412	NA	K01064	NA	NA
21960	21960	Tnr	0.14	0.07	0.05	0.06	0.06	0.08	0.15	0.09	0.07	0.08	0.08	0.1	82.96	49.87	39.01	46.19	44.06	57.81	0.0666667	0.0866667	0.0866667	0.103333	49.3533	57.28	-0.277112	0.897721	0.48257	Tnr	J1-tenascin+++TN-R+++janusin+++restrictin	mRNA	16	URS0000811E91+++URS00009B41E9+++URS00009BD44B+++URS0000A7BA2E+++URS0000A93DBC+++NM_022312+++XM_006496742+++XM_006496743+++XM_006496744+++XM_006496745+++XM_006496746+++XM_030252973+++XM_030252974+++XM_030252975+++XM_030252976+++XM_030252977	coding	known	NC_000067.6	159523729	159931729	+	1|1 H1	21960	NO_INFO	NO_INFO	21960	NA	K06252	Tnr	NA
67158	67158	Sft2d3	1.53	1.88	1.76	1.34	1.66	1.21	1.67	2.28	2.32	1.74	2.05	1.52	61	87	84	63	76	57	1.40333	1.72333	1.77	2.09	65.3333	77.3333	-0.238453	0.84293	0.370302	Sft2d3	2610206C24Rik+++AI847965+++AW046173	mRNA	2	URS00009AD684+++NM_026006	coding	known	NC_000084.6	31909094	31911903	-	18|18 B1	67158	NO_INFO	NO_INFO	67158	NA	NO_INFO	NA	NA
67563	67563	Ciao3	11.27	15.5	14.36	13.28	11.23	12.56	12.27	18.79	18.95	17.33	13.89	15.75	356	561	514	483	385	465	12.3567	13.71	15.6567	16.67	444.333	477	-0.0953637	0.938772	0.567025	Ciao3	9030612I22Rik+++AI504405+++Narfl+++PRN	mRNA	4	URS00009B0C7E+++NM_026238+++XM_006524828+++XM_006524829	coding	known	NC_000083.6	25773776	25783332	+	17|17 A3.3	67563	NO_INFO	NO_INFO	67563	NA	NO_INFO	Ciao3	NA
16571	16571	Kif4	0.13	0.09	0.14	0.1	0.14	0.17	0.14	0.11	0.19	0.13	0.17	0.21	9	7	12	8	11	14	0.136667	0.12	0.17	0.146667	11	9.33333	0.228648	0.952797	0.714962	Kif4	AI323435+++D330050K22Rik+++Kns4	mRNA	5	URS00009BDDB7+++NM_008446+++XM_006527855+++XM_011247528+++XM_017318397	coding	known	NC_000086.7	100626065	100727271	+	X C3|X 43.72 cM	16571	NO_INFO	NO_INFO	16571	NA	NO_INFO	Kif4	NA
20911	20911	Stxbp2	12.69	15.5	16.22	15.04	13.66	13.11	13.82	18.78	21.41	19.63	16.91	16.44	373	529	568	521	465	445	13.9367	14.8033	17.66	18.0033	477	490	-0.0331521	0.959049	0.83183	Stxbp2	C79054+++Munc-18-2+++Munc-18b+++Munc18b+++Sxtbp2+++Sxtp2+++Unc18-2+++Unc18b+++muSec1	mRNA	15	XR_001778417+++XR_001778418+++XR_001778419+++NM_001357168+++NM_011503+++XM_006508743+++XM_006508746+++XM_011242046+++XM_017312632+++XM_030243371+++XM_030243373+++XM_030243374+++XM_030243375+++XM_030243376+++XM_030243377	coding	known	NC_000074.6	3630960	3643998	+	8 A1.1|8 1.92 cM	20911	NO_INFO	NO_INFO	20911	NA	NO_INFO	NA	NA
209047	209047	Gipc3	0.49	0.51	0.4	0.48	0.33	0.42	0.53	0.62	0.53	0.63	0.41	0.53	25	31	25	30	20	26	0.41	0.466667	0.523333	0.56	25.3333	27	-0.104503	0.952797	0.793245	Gipc3	Ahl5+++Rgs19ip3	mRNA	6	NM_148951+++XM_030244977+++XM_030244978+++XM_030244979+++XM_030244980+++XM_030244981	coding	known	NC_000076.6	81335262	81343620	-	10|10 C1	209047	NO_INFO	NO_INFO	209047	NA	NO_INFO	NA	NA
71132	71132	Cabyr	4.16	2.56	1.44	2.16	3.56	9.01	4.53	3.1	1.91	2.82	4.41	11.29	118	93	46	80	123	312	4.91	2.72	6.17333	3.18	171.667	85.6667	0.941893	0.691975	0.203247	Cabyr	1700016C01Rik+++4933421A18Rik+++CBP86+++FSP-2	mRNA	7	URS00009ADFBE+++NM_001042418+++NM_001042419+++NM_001042420+++NM_027687+++NM_181731+++XM_017317979	coding	known	NC_000084.6	12740825	12755146	+	18|18 A1	71132	NO_INFO	NO_INFO	71132	NA	NO_INFO	NA	NA
115489141	115489141	LOC115489141	0.11	0.21	0.08	0.18	0.05	0.06	0.12	0.25	0.11	0.23	0.06	0.08	2.47	5.4	2.12	4.64	1.29	1.66	0.0966667	0.133333	0.123333	0.16	2.53	3.33	-0.585029	0.952797	0.641843	LOC115489141	NA	mRNA	1	XM_030251551	coding	known	NC_000086.7	89678057	89679736	+	NA	115489141	NO_INFO	NO_INFO	115489141	NA	NO_INFO	NA	NA
269389	269389	Tox2	0.15	0.23	0.08	0.24	0.14	0.33	0.16	0.28	0.11	0.32	0.17	0.41	6	11	4	12	6	16	0.236667	0.153333	0.3	0.183333	11.3333	7	0.689208	0.806581	0.328735	Tox2	AI851523+++AV026525+++BI987407+++Gcx1+++RxHMG1	mRNA	13	URS00009B12EB+++NM_001098799+++NM_001363063+++NM_001363064+++XM_006499608+++XM_006499609+++XM_006499610+++XM_006499611+++XM_006499612+++XM_006499615+++XM_030251667+++XM_030251668+++XM_030251669	coding	known	NC_000068.7	163203058	163324172	+	2 H3|2	269389	NO_INFO	NO_INFO	269389	NA	NO_INFO	Tox2	NA
11920	11920	Atm	0.51	0.58	0.62	0.64	0.61	0.6	0.55	0.7	0.82	0.84	0.75	0.76	92	122	135	139	128	130	0.616667	0.57	0.783333	0.69	132.333	116.333	0.187899	0.84293	0.369339	Atm	AI256621+++C030026E19Rik	mRNA	8	URS00009B4A10+++URS00009C09A2+++URS00009C1AF6+++URS00009C5C74+++XR_003947767+++XR_870525+++NM_007499+++XM_011242385	coding	known	NC_000075.6	53437122	53536828	+	9 A5.3|9 29.12 cM	11920	NO_INFO	NO_INFO	11920	NA	K04728	Atm	NA
80291	80291	Rilpl2	3.11	6.43	4.72	6.09	5.17	4.55	3.39	7.79	6.24	7.95	6.4	5.71	49	117	89	113	93	84	5.27	4.75333	6.68667	5.80667	96.6667	85	0.208859	0.884328	0.459415	Rilpl2	NA	mRNA	3	URS00009B13B6+++URS00009B7E93+++NM_030259	coding	known	NC_000071.6	124463265	124478235	+	5|5 F	80291	NO_INFO	NO_INFO	80291	NA	NO_INFO	NA	NA
14738	14738	Gpr12	0.27	0.26	0.1	0.16	0.13	0.1	0.29	0.31	0.13	0.21	0.17	0.12	9	11	4	8	5	3	0.13	0.21	0.166667	0.243333	5.33333	8	-0.618777	0.875308	0.440187	Gpr12	Gpcr01+++Gpcr12+++Gpcr20+++Gpcr21	mRNA	9	NM_001010941+++NM_001359055+++NM_001359056+++NM_001359057+++NM_001359058+++NM_008151+++XM_006504806+++XM_030254133+++XM_030254134	coding	known	NC_000071.6	146582150	146586465	-	5|5 G3	14738	NO_INFO	NO_INFO	14738	NA	NO_INFO	Gpr12	NA
217944	217944	Rapgef5	1.07	1.22	1.8	0.95	1.16	1.63	1.17	1.48	2.38	1.25	1.43	2.04	95	125	191	100	118	170	1.24667	1.36333	1.57333	1.67667	129.333	137	-0.0649124	0.954516	0.819848	Rapgef5	4932413M22+++C86120+++D030051B22Rik+++GFR+++Mrgef+++mKIAA0277+++mmr-gef	mRNA	11	URS00009B0B4B+++URS00009B2092+++URS00009BD29B+++URS00009BE26B+++URS00009C0518+++URS00009C162B+++URS00009C1CD9+++URS00009C254A+++NM_175930+++XM_006515781+++XM_030246682	coding	known	NC_000078.6	117516479	117759734	+	12|12 F2	217944	NO_INFO	NO_INFO	217944	NA	K08019	Rapgef5	NA
258692	258692	Olfr1442	0	0	0	0.07	0	0	0	0	0	0.09	0	0	0	0	0	1	0	0	0.0233333	0	0.03	0	0.333333	0	0.949827	0.952797	0.815937	Olfr1442	MOR202-9	mRNA	1	NM_146697	coding	known	NC_000085.6	12674179	12675243	+	19|19 A	258692	NO_INFO	NO_INFO	258692	NA	K04257	NA	NA
68499	68499	Mrpl53	63.79	89.82	59.72	68.06	60.57	61.13	69.47	108.84	78.85	88.82	74.97	76.66	369	598	411	458	393	408	63.2533	71.11	80.15	85.72	419.667	459.333	-0.129239	0.899887	0.487556	Mrpl53	1110007K17Rik	mRNA	1	NM_026744	coding	known	NC_000072.6	83109108	83109932	+	6|6 C3	68499	NO_INFO	NO_INFO	68499	NA	NO_INFO	NA	NA
93887	93887	Pcdhb16	0.06	0.01	0	0.01	0.02	0.02	0.07	0.01	0	0.01	0.03	0.03	5	1	0	1	2	2	0.0166667	0.0233333	0.0233333	0.0266667	1.66667	2	-0.4053	0.952797	0.791085	Pcdhb16	Pcdhb8+++PcdhbP	mRNA	1	NM_053141	coding	known	NC_000084.6	37477768	37483038	+	18|18 B3	93887	NO_INFO	NO_INFO	93887	NA	NO_INFO	NA	NA
11544	11544	Adprh	3.47	4.83	3.26	3.35	3.03	3.57	3.78	5.85	4.3	4.37	3.75	4.47	72	116	81	82	72	87	3.31667	3.85333	4.19667	4.64333	80.3333	89.6667	-0.157131	0.927433	0.542283	Adprh	Arh1	mRNA	5	URS00009B5123+++URS00009B8E83+++URS0000D6F34D+++URS0000D70DEC+++NM_007414	coding	known	NC_000082.6	38445399	38453494	+	16|16 B3- B4	11544	NO_INFO	NO_INFO	11544	NA	NO_INFO	Adprh	NA
105242430	105242430	Gm38699	0.48	0.91	0.59	0.2	0.2	0.16	0.52	1.1	0.77	0.27	0.25	0.2	4	8.79	5.85	2	1.9	1.58	0.186667	0.66	0.24	0.796667	1.82667	6.21333	-2.08097	0.453648	0.0688139	Gm38699	Gm21067	mRNA	1	XM_011243947	coding	known	NC_000078.6	23782246	23800955	-	12 A1.3|12	105242430	NO_INFO	NO_INFO	105242430	NA	NO_INFO	NA	NA
320080	320080	Zbtb39	1.83	1.33	1.52	1.52	1.47	1.34	2	1.61	2	1.98	1.82	1.68	163	137	162	160	151	141	1.44333	1.56	1.82667	1.87	150.667	154	-0.0579897	0.952797	0.798895	Zbtb39	7030401O21Rik+++mKIAA0352	mRNA	2	URS00009B5576+++NM_198035	coding	known	NC_000076.6	127739530	127747349	+	10|10 D3	320080	NO_INFO	NO_INFO	320080	NA	NO_INFO	Zbtb39	NA
218756	218756	Slc4a7	0.44	0.57	0.55	0.74	0.8	0.76	0.48	0.69	0.73	0.97	0.99	0.95	49	72	76	97	102	98	0.766667	0.52	0.97	0.633333	99	65.6667	0.599313	0.204413	0.0149539	Slc4a7	E430014N10Rik+++NBC3+++NBCn1+++NBCn1-G+++Tg(Thy1-SNCA)12Mjff	mRNA	21	URS00009C11BF+++XR_001781108+++NM_001033270+++NM_001360504+++NM_001360505+++NM_001360506+++NM_001360508+++NM_001360509+++NM_001360510+++NM_001360511+++NM_001360512+++NM_001360513+++NM_001360514+++NM_001360515+++NM_001360516+++NM_001360517+++NM_001360520+++XM_006517998+++XM_006517999+++XM_017315953+++XM_017315955	coding	known	NC_000080.6	14703011	14799944	+	14|14 A1	218756	NO_INFO	NO_INFO	218756	NA	NO_INFO	NA	NA
77480	77480	Kidins220	3.01	4.55	5.78	5.94	4.91	4.93	3.28	5.51	7.64	7.75	6.08	6.18	349	603	796	821	653	665	5.26	4.44667	6.67	5.47667	713	582.667	0.316302	0.615882	0.14426	Kidins220	3110039L19Rik+++AI194387+++AI316525+++C330002I19Rik+++mKIAA1250	mRNA	24	URS00009B601A+++URS00009B684A+++URS00009B85AA+++URS00009C09A8+++URS00009C3648+++URS0000BDC430+++NM_001081378+++XM_006515249+++XM_006515250+++XM_006515251+++XM_006515252+++XM_006515253+++XM_006515254+++XM_006515255+++XM_006515256+++XM_006515257+++XM_006515258+++XM_006515259+++XM_006515260+++XM_017315243+++XM_017315244+++XM_030246979+++XM_030246980+++XM_030246981	coding	known	NC_000078.6	24974903	25067478	+	12|12 A1.3	77480	NO_INFO	NO_INFO	77480	NA	K12460	NA	NA
102637087	102637087	Gm33989	0.69	0.69	0.59	1.09	0.99	0.84	0.76	0.84	0.79	1.42	1.23	1.06	170	196	175	317	280	244	0.973333	0.656667	1.23667	0.796667	280.333	180.333	0.62193	0.0410663	0.00132431	Gm33989	6230415J03Rik+++Gm37494+++Gm4790	mRNA	13	URS000076033E+++URS0000768287+++URS0000787B8B+++URS00009B3454+++URS00009B8126+++URS00009BA2E6+++URS00009C071F+++URS00009C0E69+++URS00009C1675+++URS00009C254C+++URS00009C6058+++URS00009C60FB+++XM_030243160	coding	known	NC_000073.6	39542537	39580814	+	7 B3|7	102637087	NO_INFO	NO_INFO	102637087	NA	NO_INFO	NA	NA
227743	227743	Mapkap1	10.91	13.67	12.59	13.46	12.99	12.11	11.89	16.56	16.63	17.56	16.08	15.19	427	597	592	566	525	536	12.8533	12.39	16.2767	15.0267	542.333	538.667	0.0125987	0.991762	0.929827	Mapkap1	AI591529+++D230039K05Rik+++Sin1	mRNA	37	URS00009AFFBF+++URS00009B03C3+++URS00009B4234+++URS00009B9F02+++URS00009C111E+++URS00009C330B+++URS00009C5B31+++NM_001290625+++NM_001290626+++NM_001362919+++NM_001362920+++NM_001362921+++NM_177345+++XM_006497975+++XM_006497978+++XM_006497980+++XM_006497983+++XM_011239083+++XM_011239084+++XM_017317446+++XM_030249979+++XM_030249981+++XM_030249984+++XM_030249988+++XM_030249991+++XM_030249994+++XM_03…	coding	known	NC_000068.7	34406771	34624958	+	2|2 B	227743	NO_INFO	NO_INFO	227743	NA	K20410	NA	NA
22110	22110	Tspyl1	4.31	6.73	8.13	7.19	6.88	5.9	4.69	8.16	10.73	9.38	8.52	7.4	164	297	371	324	301	265	6.65667	6.39	8.43333	7.86	296.667	277.333	0.123645	0.943654	0.584066	Tspyl1	Tspyl	mRNA	1	NM_009433	coding	known	NC_000076.6	34282190	34284885	+	10|10 B1	22110	NO_INFO	NO_INFO	22110	NA	NO_INFO	NA	NA
67741	67741	4930579F01Rik	0.1	0	0	0.04	0	0	0.11	0	0	0.06	0	0	2	0	0	1	0	0	0.0133333	0.0333333	0.02	0.0366667	0.333333	0.666667	-1.1064	0.952797	0.715391	4930579F01Rik	NA	mRNA	4	NM_001163385+++NM_001163386+++XM_006501945+++XM_006501946	coding	known	NC_000069.6	138164078	138193831	-	3|3 G3	67741	NO_INFO	NO_INFO	67741	NA	NO_INFO	NA	NA
70423	70423	Tspan15	1.01	1.51	1.12	0.84	1.7	1.5	1.1	1.83	1.48	1.1	2.1	1.88	31	60	62	52	67	54	1.34667	1.21333	1.69333	1.47	57.6667	51	0.200136	0.919116	0.522906	Tspan15	1110036D12Rik+++2700063A19Rik+++AW048364+++Tm4sf15	mRNA	6	URS00009BBBB2+++URS00009C58D4+++NM_197996+++XM_006514080+++XM_011243560+++XM_011243561	coding	known	NC_000076.6	62185396	62231276	-	10|10 B4	70423	NO_INFO	NO_INFO	70423	NA	NO_INFO	Tspan15	NA
140488	140488	Igf2bp3	0	0.06	0	0	0	0	0	0.07	0	0	0	0	0	4	0	0	0	0	0	0.02	0	0.0233333	0	1.33333	-2.75413	0.856483	0.400668	Igf2bp3	2610101N11Rik+++AA522010+++AL022933+++AU045931+++IMP-3+++IMP3+++Koc13+++Neilsen+++mimp3	mRNA	8	URS00009BEF8A+++URS00009BFBC3+++URS00009C3192+++XR_377421+++NM_023670+++XM_006505517+++XM_006505519+++XM_030255148	coding	known	NC_000072.6	49085218	49215469	+	6 B2.3|6 23.82 cM	140488	NO_INFO	NO_INFO	140488	NA	NO_INFO	NA	NA
232337	232337	Zfp637	17.54	17.45	16.42	15.53	13.49	14.85	19.11	21.15	21.68	20.26	16.7	18.62	255	295	288	271	228	254	14.6233	17.1367	18.5267	20.6467	251	279.333	-0.165874	0.815673	0.33851	Zfp637	AI646709+++BC021601+++Znf32	mRNA	14	URS00009C141E+++NM_001346647+++NM_001346648+++NM_001346649+++NM_001346650+++NM_001346651+++NM_001346652+++NM_001346653+++NM_177684+++XM_006506017+++XM_017321540+++XM_030255351+++XM_030255352+++XM_030255353	coding	known	NC_000072.6	117840583	117845957	+	6|6 F1	232337	NO_INFO	NO_INFO	232337	NA	NO_INFO	NA	NA
59057	59057	Zfp24	2.32	2.92	2.77	3.07	2.95	3.14	2.53	3.54	3.66	4	3.65	3.94	198	288	286	312	291	320	3.05333	2.67	3.86333	3.24333	307.667	257.333	0.263008	0.56259	0.116391	Zfp24	3526401F17Rik+++5033419P20Rik+++AI480505+++AI642085+++AL024422+++KOX17+++ZF-12+++Zfp191+++Znf24	mRNA	3	NM_001357447+++NM_001357448+++NM_021559	coding	known	NC_000084.6	24009717	24020813	-	18|18 A2	59057	NO_INFO	NO_INFO	59057	NA	NO_INFO	Zfp24	NA
110208	110208	Pgd	10.96	14.78	19.81	15.25	13.97	14.95	11.93	17.91	26.16	19.9	17.3	18.75	333	524	727	552	491	539	14.7233	15.1833	18.65	18.6667	527.333	528	0.0209876	0.988057	0.919986	Pgd	0610042A05Rik+++AU019875+++C78335	mRNA	6	NM_001081274+++NM_001356332+++XM_006538472+++XM_030253082+++rna-NM_001081274.2-2+++rna-NM_001356332.1-2	coding	known	NT_166299.2	2570477	149166705	-	4 E2|4 78.96 cM	110208	NO_INFO	NO_INFO	110208	NA	K00033	Pgd	COG0362///NA+++COG1023///NA
14089	14089	Fap	0.1	0.06	0.07	0	0	0.08	0.11	0.07	0.09	0	0	0.1	3	2	3	0	0	3	0.0266667	0.0766667	0.0333333	0.09	1	2.66667	-1.4388	0.84293	0.369822	Fap	SIMP	mRNA	5	NM_007986+++XM_006498746+++XM_011239289+++XM_017315507+++XM_017315512	coding	known	NC_000068.7	62500936	62575509	-	2 C1.3|2 35.85 cM	14089	NO_INFO	NO_INFO	14089	NA	NO_INFO	NA	NA
67467	67467	Gpalpp1	1.79	2.38	3.03	2.87	2.86	2.63	1.95	2.88	4	3.74	3.53	3.29	145	223	294	275	266	251	2.78667	2.4	3.52	2.94333	264	220.667	0.276854	0.674484	0.189148	Gpalpp1	1200011I18Rik+++Kiaa1704	mRNA	2	URS00009B645D+++NM_026177	coding	known	NC_000080.6	76086232	76110815	-	14|14 D3	67467	NO_INFO	NO_INFO	67467	NA	NO_INFO	NA	NA
56447	56447	Copz1	72.69	86.44	91.15	71.42	72.07	73.17	79.17	104.75	120.34	93.2	89.2	91.76	1638	2255	2459	1899	1859	1938	72.22	83.4267	91.3867	101.42	1898.67	2117.33	-0.150677	0.748245	0.257675	Copz1	5930435A22Rik+++AA407760+++D4Ertd360e	mRNA	3	URS00009AE93A+++NM_001357748+++NM_019817	coding	known	NC_000081.6	103272888	103299865	+	15 F3|15 58.74 cM	56447	NO_INFO	NO_INFO	56447	NA	NO_INFO	Copz1	COG5541///NA
15446	15446	Hpgd	65.45	70.4	90.29	64.91	66.07	70.6	71.27	85.32	119.21	84.71	81.78	88.53	1497	1865	2475	1754	1732	1899	67.1933	75.38	85.0067	91.9333	1795	1945.67	-0.108974	0.909607	0.502611	Hpgd	15-PGDH+++AV026552	mRNA	3	URS00009B112D+++URS00009C2699+++NM_008278	coding	known	NC_000074.6	56294537	56321046	+	8|8 B2	15446	NO_INFO	NO_INFO	15446	NA	K00069	Hpgd	NA
15077	15077	H3c14	0	9.08	6.8	0	3.3	6.66	0	11.01	8.97	0	4.09	8.36	0	67.69	52.34	0	24.05	49.87	3.32	5.29333	4.15	6.66	24.64	40.01	-0.570134	0.95321	0.816894	H3c14	BE691662+++H3-615+++H3c13+++H3c15+++H3c2+++H3c3+++H3c4+++H3c6+++H3c7+++H3f2+++Hist2h3c1+++Hist2h3ca1	mRNA	1	NM_178216	coding	known	NC_000069.6	96246685	96247348	+	3|3 F2.1	15077	NO_INFO	NO_INFO	15077	NA	K11253	H3c14	NA
22414	22414	Wnt2b	0	0.17	0.06	0.07	0	0.03	0	0.2	0.09	0.09	0	0.04	0	10	4	4	0	2	0.0333333	0.0766667	0.0433333	0.0966667	2	4.66667	-1.14916	0.861121	0.408852	Wnt2b	Wnt13	mRNA	3	URS0000811FC3+++URS00009B7641+++NM_009520	coding	known	NC_000069.6	104944805	104961709	+	3 F2.2|3 45.88 cM	22414	NO_INFO	NO_INFO	22414	NA	K00182	Wnt2b	NA
70238	70238	Rnf168	1.83	2.38	2.92	2.25	2	2.32	1.99	2.88	3.86	2.94	2.47	2.91	120	181	230	175	151	180	2.19	2.37667	2.77333	2.91	168.667	177	-0.0550165	0.952797	0.80151	Rnf168	3110001H15Rik	mRNA	4	URS00009B5D45+++URS00009BDFC1+++URS00009C4050+++NM_027355	coding	known	NC_000082.6	32277461	32304494	+	16|16 B2	70238	NO_INFO	NO_INFO	70238	NA	NO_INFO	NA	NA
94254	94254	Rcc1l	5.12	4.96	5.52	5.2	4.63	4.03	5.58	6	7.29	6.79	5.73	5.05	165	184	213	198	173	152	4.62	5.2	5.85667	6.29	174.333	187.333	-0.112168	0.940099	0.572782	Rcc1l	5730496C04Rik+++AU019812+++Wbscr16	mRNA	8	URS00009B05B2+++URS00009C21AF+++XR_377117+++NM_033572+++XM_006504537+++XM_006504538+++XM_006504539+++XM_011240917	coding	known	NC_000071.6	134148058	134179124	+	5|5 G2	94254	NO_INFO	NO_INFO	94254	NA	NO_INFO	NA	NA
14699	14699	Gngt1	1.42	0.21	1.35	0.15	0.08	0.81	1.55	0.25	1.78	0.2	0.1	1.02	12	2	9	2	1	8	0.346667	0.993333	0.44	1.19333	3.66667	7.66667	-1.1401	0.749712	0.259239	Gngt1	G(y)1+++Gng1+++Hg3g1	mRNA	5	NM_010314+++XM_006504986+++XM_017321387+++XM_017321388+++XM_017321389	coding	known	NC_000072.6	3989082	3997436	+	6|6 A1	14699	NO_INFO	NO_INFO	14699	NA	K04548	NA	NA
19883	19883	Rora	2.91	2.77	3.34	4.29	3.35	3.31	3.17	3.35	4.41	5.6	4.15	4.15	443	502	625	822	595	606	3.65	3.00667	4.63333	3.64333	674.333	523.333	0.357917	0.383776	0.0472254	Rora	9530021D13Rik+++Nr1f1+++ROR1+++ROR2+++ROR3+++nmf267+++sg+++staggerer+++tmgc26	mRNA	35	URS00009AE0B0+++URS00009B0974+++URS00009B118A+++URS00009B28C4+++URS00009B3BC7+++URS00009B5784+++URS00009B63BA+++URS00009B912D+++URS00009B97A7+++URS00009BB89D+++URS00009BBA9B+++URS00009BC0C5+++URS00009BD320+++URS00009BD7D5+++URS00009BD9F8+++URS00009C10CD+++URS00009C16C7+++URS00009C1E08+++URS00009C1F82+++URS00009C2767+++URS00009C366A+++URS00009C3BC5+++URS00009C405F+++URS00009C5506+++URS00009C564F++…	coding	known	NC_000075.6	68653404	69388246	+	9 C|9 37.45 cM	19883	NO_INFO	NO_INFO	19883	NA	K08532	Rora	NA
242418	242418	Dcaf10	1.38	1.99	2.69	3.01	2.61	2.43	1.51	2.41	3.56	3.93	3.23	3.05	150	250	352	389	328	315	2.68333	2.02	3.40333	2.49333	344	250.667	0.480703	0.346932	0.0385057	Dcaf10	AA959934+++Wdr32	mRNA	5	URS00009AFA38+++URS00009BFE12+++URS00009C45A7+++NM_153167+++XM_006537912	coding	known	NC_000070.6	45340976	45379732	+	4|4 B1	242418	NO_INFO	NO_INFO	242418	NA	NO_INFO	Dcaf10	NA
71972	71972	Dnmbp	9.93	10.4	10.9	16.65	17.07	14.45	10.81	12.6	14.39	21.73	21.13	18.13	619	777	894	1319	1266	1121	16.0567	10.41	20.33	12.6	1235.33	763.333	0.695156	0.000279509	2.23324e-06	Dnmbp	2410003L07Rik+++2410003M15Rik+++TUBA	mRNA	11	URS00009AF1CF+++URS00009B01E6+++URS00009B43C3+++URS00009C3605+++URS00009C4652+++NM_001306088+++NM_028029+++XM_006527350+++XM_006527351+++XM_006527352+++XM_006527354	coding	known	NC_000085.6	43846815	43940920	+	19|19 C3	71972	NO_INFO	NO_INFO	71972	NA	NO_INFO	NA	NA
13731	13731	Emp2	0.93	1.72	1.11	1.75	1.8	2.2	1.01	2.08	1.46	2.29	2.23	2.76	46	99	66	103	103	129	1.91667	1.25333	2.42667	1.51667	111.667	70.3333	0.684934	0.193675	0.0136563	Emp2	XMP	mRNA	1	NM_007929	coding	known	NC_000082.6	10281749	10313968	-	16 A1|16 5.54 cM	13731	NO_INFO	NO_INFO	13731	NA	NO_INFO	Emp2	NA
22751	22751	Zfp90	0.64	0.86	0.58	0.52	0.37	0.5	0.7	1.04	0.77	0.68	0.46	0.63	27	43	29	24	18	29	0.463333	0.693333	0.59	0.836667	23.6667	33	-0.480384	0.718905	0.229654	Zfp90	6430515L01Rik+++KRAB17+++NK10+++Zfp64+++Zfp83+++mKIAA1954	mRNA	7	URS0000A8D113+++NM_001368328+++NM_001368329+++NM_001368330+++NM_001368331+++NM_011764+++XM_006530849	coding	known	NC_000074.6	106415295	106426943	+	8 D3|8 53.14 cM	22751	NO_INFO	NO_INFO	22751	NA	K09228	NA	NA
15108	15108	Hsd17b10	434.65	283.49	278	200.89	310.91	292.23	473.37	343.53	367.01	262.15	384.83	366.46	4481	3376	3424	2431	3641	3515	268.01	332.047	337.813	394.637	3195.67	3760.33	-0.276474	0.759205	0.267689	Hsd17b10	17bHSD10+++Ads9+++ERAB+++Hadh2+++MHBD	mRNA	1	NM_016763	coding	known	NC_000086.7	152001896	152004442	+	X|X F3	15108	NO_INFO	NO_INFO	15108	NA	K08683	Hsd17b10	NA
241877	241877	Slc10a5	2.19	2.63	4.27	5.17	4.45	3.88	2.38	3.18	5.64	6.74	5.51	4.87	125	174	293	350	293	262	4.5	3.03	5.70667	3.73333	301.667	197.333	0.631307	0.181375	0.0122829	Slc10a5	Gm405+++mP5	mRNA	1	NM_001010834	coding	known	NC_000069.6	10331734	10335656	-	3|3 A1	241877	NO_INFO	NO_INFO	241877	NA	NO_INFO	NA	NA
381337	381337	Fam178b	0.11	0.2	0	0.09	0	0	0.12	0.24	0	0.12	0	0	1	2	0	1	0	0	0.03	0.103333	0.04	0.12	0.333333	1	-1.49671	0.934874	0.556964	Fam178b	1700024G10Rik+++Gm990	mRNA	14	NM_001126046+++NM_027957+++NM_201365+++XM_006496116+++XM_006496118+++XM_006496122+++XM_011238555+++XM_017321436+++XM_017321439+++XM_017321446+++XM_017321449+++XM_017321451+++XM_017321452+++XM_030255205	coding	known	NC_000067.6	36562696	36683190	-	1|1 B	381337	NO_INFO	NO_INFO	381337	NA	NO_INFO	Fam178b	NA
77721	77721	Mrps5	47.77	40.29	39.03	38.01	42.14	41.06	52.03	48.82	51.53	49.6	52.15	51.48	881	860	862	827	889	889	40.4033	42.3633	51.0767	50.7933	868.333	867.667	-0.0213933	0.981269	0.901307	Mrps5	1620401I16Rik+++AI850294	mRNA	1	NM_029963	coding	known	NC_000068.7	127587426	127603986	+	2|2 F1	77721	NO_INFO	NO_INFO	77721	NA	K02988	NA	COG0098///NA
19328	19328	Rab12	9.55	11.59	9.44	10.4	11	10.63	10.4	14.05	12.46	13.58	13.61	13.33	253	368	310	337	344	341	10.6767	10.1933	13.5067	12.3033	340.667	310.333	0.136094	0.862857	0.412549	Rab12	2900054P15Rik+++AW555448+++C77700	mRNA	4	URS00009BC7BF+++XR_876464+++NM_024448+++XM_006523889	coding	known	NC_000083.6	66494512	66519750	-	17|17 E1.1	19328	NO_INFO	NO_INFO	19328	NA	NO_INFO	NA	NA
210106	210106	Tent4a	3.07	4.38	4.73	6.22	4.87	4.55	3.35	5.31	6.25	8.11	6.03	5.71	183	307	355	445	341	324	5.21333	4.06	6.61667	4.97	370	281.667	0.409845	0.394428	0.0500463	Tent4a	LAK-1+++POLK+++Papd7+++Pols+++TRF4+++TRF4-1	mRNA	6	NM_001169131+++NM_198600+++XM_006517185+++XM_006517186+++XM_006517187+++XM_030247220	coding	known	NC_000079.6	69497952	69534236	-	13 B3|13 35.55 cM	210106	NO_INFO	NO_INFO	210106	NA	K03514	Tent4a	COG5260///NA
99633	99633	Adgrl2	5.97	6.5	11.5	7.6	5.42	5.83	6.5	7.88	15.19	9.92	6.71	7.31	503	620	1141	745	515	566	6.28333	7.99	7.98	9.85667	608.667	754.667	-0.295719	0.726173	0.23677	Adgrl2	AI450192+++CIRL-2+++Gm619+++Lec1+++Lphh1+++Lphn2+++mKIAA0786	mRNA	56	URS00009AD6DD+++URS00009BE383+++URS00009C1DF6+++URS00009C3815+++URS00009C4585+++NM_001081298+++XM_006502423+++XM_006502424+++XM_006502425+++XM_006502426+++XM_006502427+++XM_006502430+++XM_006502431+++XM_006502432+++XM_006502433+++XM_006502435+++XM_006502436+++XM_006502437+++XM_006502438+++XM_006502439+++XM_006502440+++XM_006502442+++XM_006502450+++XM_006502451+++XM_006502453+++XM_006502456+++XM_0…	coding	known	NC_000069.6	148815586	148989096	+	3|3 H3	99633	NO_INFO	NO_INFO	99633	NA	NO_INFO	Adgrl2	NA
23827	23827	Bpnt1	16.2	24.21	22.72	15.41	18.14	13.86	17.65	29.34	30	20.12	22.45	17.38	489	843	821	540	628	480	15.8033	21.0433	19.9833	25.6633	549.333	717.667	-0.365758	0.39657	0.0505182	Bpnt1	BPntase	mRNA	8	URS00009B1A32+++URS00009C2AB9+++NM_001347210+++NM_001347212+++NM_011794+++XM_006497160+++XM_006497161+++XM_030253921	coding	known	NC_000067.6	185329428	185357777	+	1|1 H5	23827	NO_INFO	NO_INFO	23827	NA	K01082	Bpnt1	COG1218///NA
16816	16816	Lcat	590.1	595.19	526.92	530.08	520.15	512.64	642.66	721.25	695.63	691.74	643.82	642.85	10222	11932	10929	10829	10302	10421	520.957	570.737	659.47	686.513	10517.3	11027.7	-0.0821988	0.924444	0.537341	Lcat	AI046659+++D8Wsu61e	mRNA	1	NM_008490	coding	known	NC_000074.6	105939551	105943402	-	8 D3|8 53.06 cM	16816	NO_INFO	NO_INFO	16816	NA	K00650	NA	NA
239652	239652	Zfp641	0	0.08	0.08	0.03	0.02	0.04	0	0.1	0.1	0.03	0.02	0.05	0	7	6	2	1	3	0.03	0.0533333	0.0333333	0.0666667	2	4.33333	-1.03357	0.864311	0.414816	Zfp641	9930016F01Rik+++Znf641	mRNA	10	XR_875298+++NM_001358068+++NM_173769+++XM_006520969+++XM_006520970+++XM_006520971+++XM_006520973+++XM_006520974+++XM_011245627+++XM_017316604	coding	known	NC_000081.6	98285585	98296515	-	15|15 F1	239652	NO_INFO	NO_INFO	239652	NA	K09228	NA	NA
65113	65113	Ndfip1	64.42	84.9	88.84	93.26	90.84	92.98	70.15	102.88	117.29	121.71	112.44	116.6	1552	2368	2564	2654	2508	2634	92.36	79.3867	116.917	96.7733	2598.67	2161.33	0.279218	0.408009	0.0543759	Ndfip1	0610010M22Rik+++N4wbp5	mRNA	3	URS00009BDC57+++NM_001355749+++NM_022996	coding	known	NC_000084.6	38418907	38465197	+	18|18 B3	65113	NO_INFO	NO_INFO	65113	NA	NO_INFO	NA	NA
319618	319618	Dcp1b	0.77	1.26	1.22	1.06	0.95	0.98	0.84	1.53	1.61	1.39	1.18	1.23	37	70	70	60	52	55	0.996667	1.08333	1.26667	1.32667	55.6667	59	-0.0669319	0.954673	0.82016	Dcp1b	B930050E02Rik	mRNA	9	URS00009AFFB8+++NM_001033379+++XM_006506238+++XM_017321621+++XM_017321622+++XM_030255440+++XM_030255441+++XM_030255442+++XM_030255443	coding	known	NC_000072.6	119175253	119221614	+	6|6 F1	319618	NO_INFO	NO_INFO	319618	NA	K12611	NA	NA
57260	57260	Ltb4r2	0.38	0.99	0.5	0.55	0.28	0.5	0.41	1.19	0.65	0.72	0.35	0.63	8	29	13	13	7	16	0.443333	0.623333	0.566667	0.75	12	16.6667	-0.442368	0.888884	0.465086	Ltb4r2	5830462O07Rik+++BLT2+++LTB4-R 2+++LTB4-R-2+++LTB4-R2	mRNA	3	NM_020490+++XM_006519323+++XM_006519326	coding	known	NC_000080.6	55757922	55764066	+	14|14 C3	57260	NO_INFO	NO_INFO	57260	NA	K04297	NA	NA
19326	19326	Rab11b	48.73	45	39.06	38.14	40.79	37.3	53.07	54.53	51.56	49.77	50.48	46.78	1366	1516	1391	1381	1397	1322.21	38.7433	44.2633	49.01	53.0533	1366.74	1424.33	-0.0763281	0.952797	0.613429	Rab11b	A730055L17Rik	mRNA	9	URS00009AD2BC+++URS00009B6B77+++URS00009BE927+++NM_008997+++XM_006523887+++XM_030249599+++rna-NM_008997.3-2+++rna-NM_008997.3-3+++rna-NM_008997.3-4	coding	known	NT_187004.1	1416	33760486	+	17 B1|17 17.98 cM	19326	NO_INFO	NO_INFO	19326	NA	K07905	Rab11b	NA
18576	18576	Pde3b	6.45	7.03	8.99	12.43	10.81	11.53	7.02	8.52	11.87	16.22	13.38	14.46	505	639	845	1154	975	1067	11.59	7.49	14.6867	9.13667	1065.33	663	0.689591	0.00301248	3.83661e-05	Pde3b	9830102A01Rik+++AI847709	mRNA	8	URS00009B518F+++URS00009B8FE5+++URS00009BFEC9+++URS00009C195E+++XR_001785490+++XR_003946416+++NM_011055+++XM_006507438	coding	known	NC_000073.6	114415222	114539041	+	7 F1|7 59.46 cM	18576	NO_INFO	NO_INFO	18576	NA	K13296	Pde3b	NA
20623	20623	Snrk	10.32	11.55	14.4	17.44	12.79	12.22	11.24	14	19.01	22.76	15.83	15.32	722	938	1233	1470	1042	1015	14.15	12.09	17.97	14.75	1175.67	964.333	0.289729	0.594911	0.133473	Snrk	2010012F07Rik+++AI448042+++AW547029+++E030034B15+++R74830+++mKIAA0096	mRNA	11	URS00009BB98E+++URS00009BDB87+++URS0000AAA65E+++NM_001164572+++NM_001357774+++NM_001357775+++NM_001357776+++NM_133741+++XM_006511999+++XM_006512000+++XM_006512002	coding	known	NC_000075.6	122117266	122169702	+	9|9 F4	20623	NO_INFO	NO_INFO	20623	NA	NO_INFO	Snrk	NA
13830	13830	Stom	13.77	17.35	15.45	13.45	12.26	11.53	15	21.02	20.39	17.56	15.18	14.46	550	803	740	636	563	543	12.4133	15.5233	15.7333	18.8033	580.667	697.667	-0.262137	0.470834	0.0739519	Stom	Epb7.2	mRNA	1	NM_013515	coding	known	NC_000068.7	35313990	35337009	-	2 B|2 23.53 cM	13830	NO_INFO	NO_INFO	13830	NA	NO_INFO	NA	NA
74121	74121	Acoxl	0	0.02	0.02	0.02	0.03	0	0	0.03	0.03	0.03	0.03	0	0	1	1	1	2	0	0.0166667	0.0133333	0.02	0.02	1	0.666667	0.653623	0.952797	0.766534	Acoxl	1200014P05Rik+++AV025673	mRNA	5	URS00009B2FBC+++URS00009BDA1A+++NM_028765+++XM_006500273+++XM_011239808	coding	known	NC_000068.7	127838797	128126252	+	2|2 F1	74121	NO_INFO	NO_INFO	74121	NA	NO_INFO	NA	NA
14687	14687	Gnaz	0.06	0.07	0	0	0.02	0	0.07	0.09	0	0	0.02	0	3	4	0	0	1	0	0.00666667	0.0433333	0.00666667	0.0533333	0.333333	2.33333	-2.75049	0.666555	0.18127	Gnaz	AI847979+++Gz	mRNA	5	URS00009BF823+++NM_001358848+++NM_010311+++XM_006513235+++XM_006513236	coding	known	NC_000076.6	74967177	75016907	+	10 B5.3|10 38.48 cM	14687	NO_INFO	NO_INFO	14687	NA	K04535	Gnaz	NA
245578	245578	Pcdh11x	0	0.03	0.01	0	0	0	0	0.03	0.02	0	0	0	0	4	1	0	0	0	0	0.0133333	0	0.0166667	0	1.66667	-3.08191	0.735853	0.244691	Pcdh11x	PCDHX+++PCDHX11+++Pcdh11	mRNA	23	NR_073451+++NR_073452+++URS00009AE155+++URS00009AF2B4+++URS00009B0719+++URS00009B2ED1+++URS00009B9F98+++URS00009BA235+++URS00009BA3A0+++URS00009BAABA+++URS00009BC04A+++URS00009C1E07+++XR_001782746+++XR_387044+++XR_387045+++NM_001271809+++NM_001271810+++XM_006528386+++XM_006528387+++XM_006528388+++XM_006528389+++XM_006528390+++XM_006528392	coding	known	NC_000086.7	120290238	120910622	+	X|X E2	245578	NO_INFO	NO_INFO	245578	NA	NO_INFO	Pcdh11x	NA
20818	20818	Srprb	9.59	11.85	8.5	9.82	6.95	5.76	10.44	14.36	11.22	12.82	8.61	7.23	409	586	435	496	341	290	7.51	9.98	9.55333	12.0067	375.667	476.667	-0.353852	0.550818	0.108661	Srprb	AA409543	mRNA	2	URS00009BA897+++NM_009275	coding	known	NC_000075.6	103188033	103202065	-	9|9 F1	20818	NO_INFO	NO_INFO	20818	NA	K12272	NA	NA
76976	76976	Arxes2	0	0	0	0.13	0.04	0.04	0	0	0	0.17	0.05	0.05	0	0	0	3	1	1	0.07	0	0.09	0	1.66667	0	3.15196	0.655758	0.173627	Arxes2	2900062L11Rik+++Spc22/23+++Spcs3	mRNA	1	NM_029823	coding	known	NC_000086.7	135993820	135995359	+	X|X F1	76976	NO_INFO	NO_INFO	76976	NA	K12948	Arxes2	NA
100710	100710	Pds5b	1.27	2.01	2.46	2.04	1.92	1.96	1.38	2.43	3.25	2.66	2.38	2.46	140	250	311	254	240	246	1.97333	1.91333	2.5	2.35333	246.667	233.667	0.103661	0.952797	0.641376	Pds5b	AI646570+++AS3+++AW212954+++Aprin+++Tg(Wap-ERBB2)229Wzw+++WAP-Her-2+++mKIAA0979	mRNA	11	URS00008C430E+++URS00009B618A+++URS00009C365F+++URS00009C3F7F+++NM_001346503+++NM_175310+++XM_006504901+++XM_006504903+++XM_006504904+++XM_006504905+++XM_030254020	coding	known	NC_000071.6	150673713	150810669	+	5|5 G3	100710	NO_INFO	NO_INFO	100710	NA	NO_INFO	NA	NA
23830	23830	Capn10	5.31	10.4	8.38	13.59	12.28	10.27	5.78	12.61	11.06	17.74	15.2	12.88	217	493	411	658	577	495	12.0467	8.03	15.2733	9.81667	576.667	373.667	0.654041	0.0743286	0.0031483	Capn10	AW049679+++Capn8+++mKIAA1845	mRNA	1	NM_011796	coding	known	NC_000067.6	92934408	92947948	+	1|1 D	23830	NO_INFO	NO_INFO	23830	NA	NO_INFO	NA	NA
78781	78781	Zc3hav1	6.02	7.98	7.28	7.9	6.85	6.47	6.56	9.67	9.62	10.3	8.48	8.11	450	695	664	719	592.6	578	7.07333	7.09333	8.96333	8.61667	629.867	603	0.0690663	0.952797	0.664092	Zc3hav1	1200014N16Rik+++2900058M19Rik+++9130009D18Rik+++9830115L13Rik+++ARTD13+++D6Bwg1452e+++PARP13+++ZAP	mRNA	6	URS00009C153C+++NM_001347122+++NM_028421+++NM_028864+++XM_006506780+++XM_006506781	coding	known	NC_000072.6	38305286	38355352	-	6 B1|6 17.72 cM	78781	NO_INFO	NO_INFO	78781	NA	NO_INFO	NA	NA
242773	242773	Slc45a1	0	0.03	0	0	0	0.02	0	0.03	0	0	0	0.03	0	1	0	0	0	1	0.00666667	0.01	0.01	0.01	0.333333	0.333333	-0.0119435	0.999812	0.997383	Slc45a1	C230078B22+++Dnb5	mRNA	6	NM_001355737+++NM_173774+++XM_006538860+++XM_030253576+++rna-NM_001355737.1-2+++rna-NM_173774.3-2	coding	known	NT_187025.1	936825	150652176	-	4|4 E2	242773	NO_INFO	NO_INFO	242773	NA	NO_INFO	NA	NA
75627	75627	Snapc1	1.53	1.55	1.38	1.41	1.3	1.44	1.67	1.88	1.83	1.83	1.6	1.8	53	66	59	65	57	55	1.38333	1.48667	1.74333	1.79333	59	59.3333	-0.0160607	0.999812	0.953598	Snapc1	2700033G17Rik+++9630050P21Rik	mRNA	6	URS00009B24BB+++URS00009C386B+++NM_178392+++XM_006516334+++XM_006516335+++XM_006516336	coding	known	NC_000078.6	73964457	73989065	+	12|12 C3	75627	NO_INFO	NO_INFO	75627	NA	NO_INFO	NA	NA
433926	433926	Lrrc8b	0.05	0.13	0.17	0.12	0.12	0.07	0.05	0.16	0.23	0.15	0.15	0.08	5	15	21	14	14	8	0.103333	0.116667	0.126667	0.146667	12	13.6667	-0.146334	0.952797	0.810722	Lrrc8b	2210408K08Rik+++R75581+++Ta-lrrp+++mKIAA0231	mRNA	8	URS0000811965+++URS00009B590A+++URS00009C2FC8+++NM_001033550+++XM_011249508+++XM_030254651+++XM_030254652+++XM_030254653	coding	known	NC_000071.6	105413286	105490079	+	5|5 E5	433926	NO_INFO	NO_INFO	433926	NA	NO_INFO	Lrrc8b	NA
244310	244310	Dlgap2	0	0	0	0	0.01	0	0	0	0	0	0.01	0	0	0	0	0	1	0	0.00333333	0	0.00333333	0	0.333333	0	0.949827	0.952797	0.815937	Dlgap2	6430596N04Rik+++Dap-2+++Dap2+++Sapap2	mRNA	14	URS00009ADDF0+++URS00009BAC4D+++URS00009C08D9+++URS00009C12E9+++URS00009C4667+++URS00009C52F1+++NM_001145965+++NM_172910+++XM_006508781+++XM_006508782+++XM_006508783+++XM_017312785+++XM_030243529+++XM_030243530	coding	known	NC_000074.6	14095776	14853426	+	8|8 A1.1	244310	NO_INFO	NO_INFO	244310	NA	NO_INFO	Dlgap2	NA
231128	231128	Fam193a	3.22	3.3	3.31	3.38	2.92	2.67	3.51	4	4.37	4.41	3.62	3.35	265	315	327	330	277	260	2.99	3.27667	3.79333	3.96	289	302.333	-0.073539	0.952797	0.669161	Fam193a	NA	mRNA	6	URS00009B51BE+++URS00009B7865+++URS00009B9277+++URS00009BC45A+++URS00009BE2C4+++NM_001243123	coding	known	NC_000071.6	34369933	34489722	+	5|5 B2	231128	NO_INFO	NO_INFO	231128	NA	NO_INFO	NA	NA
27267	27267	Cars	8.45	10.19	7.92	7.98	6.32	7.12	9.2	12.35	10.46	10.42	7.82	8.93	295	430	371	348	265	307	7.14	8.85333	9.05667	10.67	306.667	365.333	-0.253618	0.614107	0.143268	Cars	CA3+++Cars1	mRNA	7	XR_378611+++NM_001252593+++NM_013742+++XM_006508627+++XM_011242001+++XM_017322295+++XM_030242631	coding	known	NC_000073.6	143557230	143600090	-	7 F5|7 88.25 cM	27267	NO_INFO	NO_INFO	27267	NA	K01883	Cars	COG0215///NA
83768	83768	Dpp7	15.54	14.41	10.22	16.18	14.08	12.83	16.92	17.46	13.5	21.11	17.43	16.09	340	365	268	418	353	330	14.3633	13.39	18.21	15.96	367	324.333	0.149205	0.899763	0.486681	Dpp7	DPPII+++Dpp2+++QPP	mRNA	2	XR_374142+++NM_031843	coding	known	NC_000068.7	25352290	25356389	-	2|2 A3	83768	NO_INFO	NO_INFO	83768	NA	NO_INFO	NA	NA
13047	13047	Cux1	5.4	7.74	7.72	7.79	8.77	7.66	5.88	9.38	10.19	10.16	10.85	9.61	296	456	453	464	487	438	8.07333	6.95333	10.2067	8.48333	463	401.667	0.215626	0.671639	0.185533	Cux1	CDP+++Cutl1+++Cux+++Cux-1	mRNA	31	URS00009AF9B9+++URS00009B16A5+++URS00009B460E+++URS00009B4661+++URS00009B7FFA+++URS00009B8C67+++URS00009BEDC6+++URS00009C15AC+++URS00009C38B3+++NM_001291233+++NM_001291234+++NM_001291238+++NM_001291239+++NM_001291240+++NM_009986+++NM_198602+++XM_006504350+++XM_006504352+++XM_006504354+++XM_006504356+++XM_017320654+++XM_030254106+++XM_030254107+++XM_030254108+++XM_030254109+++XM_030254110+++XM_030…	coding	known	NC_000071.6	136248135	136567590	-	5 G2|5 75.96 cM	13047	NO_INFO	NO_INFO	13047	NA	NO_INFO	Cux1	NA
243819	243819	Ppp6r1	18.97	28.93	27.87	26.93	26.06	23.39	20.66	35.06	36.79	35.15	32.26	29.33	967	1751	1782	1700	1544	1449	25.46	25.2567	32.2467	30.8367	1564.33	1500	0.0825618	0.952797	0.637025	Ppp6r1	2010309P17Rik+++AI836219+++B430201G11Rik+++D030074N20Rik+++Pp6r1+++Saps1+++mKIAA1115	mRNA	3	URS00009B1D8C+++NM_172894+++XM_011250556	coding	known	NC_000073.6	4631495	4659954	+	7|7 A1	243819	NO_INFO	NO_INFO	243819	NA	NO_INFO	Ppp6r1	NA
268294	268294	Zbtb24	4.42	4.4	3.33	4.27	4.21	4.18	4.81	5.33	4.4	5.58	5.21	5.25	179	207	161	205	195	200	4.22	4.05	5.34667	4.84667	200	182.333	0.116192	0.940099	0.572447	Zbtb24	BC055367+++Bif1+++Bsg1+++ZNF450	mRNA	5	NR_102360+++NM_001277229+++NM_001277230+++NM_153398+++XM_006512748	coding	known	NC_000076.6	41450358	41465582	+	10|10 B1	268294	NO_INFO	NO_INFO	268294	NA	NO_INFO	Zbtb24	NA
192976	192976	Lrrc75a	0.35	0.38	0.4	0.49	0.27	0.04	0.38	0.46	0.53	0.63	0.33	0.05	8	10	13	15	7	1	0.266667	0.376667	0.336667	0.456667	7.66667	10.3333	-0.440486	0.941054	0.574904	Lrrc75a	Fam211a	mRNA	5	URS000076CB05+++URS00007831D8+++URS00009C106C+++NM_001357955+++NM_198861	coding	known	NC_000077.6	62604884	62648523	+	11|11 B2	192976	NO_INFO	NO_INFO	192976	NA	NO_INFO	Lrrc75a	NA
68966	68966	Ngdn	19.03	19.78	17.09	16.9	15.37	13.94	20.72	23.96	22.56	22.05	19.02	17.48	282	339	303	295	260	242	15.4033	18.6333	19.5167	22.4133	265.667	308	-0.225361	0.688986	0.200617	Ngdn	1500001L15Rik+++Ngd+++neuroguidin	mRNA	2	URS00009B6513+++NM_026890	coding	known	NC_000080.6	55015454	55024138	+	14|14 C3	68966	NO_INFO	NO_INFO	68966	NA	NO_INFO	NA	NA
68988	68988	Prpf31	3.6	4.68	3.41	3.86	2.53	2.96	3.92	5.67	4.5	5.04	3.13	3.71	162	244	184	206	131	157	3.11667	3.89667	3.96	4.69667	164.667	196.667	-0.261448	0.737914	0.245925	Prpf31	1500019O16Rik+++2810404O06Rik+++AW554706+++PRP31+++RP11	mRNA	2	NM_001159714+++NM_027328	coding	known	NC_000073.6	3629985	3642485	+	7|7 A1	68988	NO_INFO	NO_INFO	68988	NA	K12844	NA	COG1498///NA
12607	12607	Cebpz	6.45	6.75	6.65	7.19	6.03	6.22	7.02	8.18	8.78	9.38	7.46	7.8	378	466	475	507	413	437	6.48	6.61667	8.21333	7.99333	452.333	439.667	0.0342563	0.956769	0.824278	Cebpz	CBF2+++Cbf	mRNA	2	NM_001024806+++XM_006523558	coding	known	NC_000083.6	78919003	78937070	-	17|17 E3	12607	NO_INFO	NO_INFO	12607	NA	NO_INFO	NA	NA
21416	21416	Tcf7l2	2.68	2.46	2.63	3.11	2.72	2.34	2.92	2.98	3.48	4.06	3.37	2.93	152	163	181	214	180	155	2.72333	2.59	3.45333	3.12667	183	165.333	0.133407	0.917739	0.519591	Tcf7l2	TCF4B+++TCF4E+++Tcf-4+++Tcf4	mRNA	60	NR_138565+++URS0000763580+++URS00009B0BF7+++URS00009C1380+++URS00009C140D+++URS00009C1F49+++NM_001142918+++NM_001142919+++NM_001142920+++NM_001142921+++NM_001142922+++NM_001142923+++NM_001142924+++NM_001331135+++NM_001331136+++NM_001331137+++NM_001331138+++NM_001331139+++NM_001331140+++NM_001331141+++NM_001331142+++NM_001331143+++NM_001331144+++NM_001331145+++NM_001331146+++NM_001331147+++NM_0013…	coding	known	NC_000085.6	55741797	55933659	+	19 D2|19 51.59 cM	21416	NO_INFO	NO_INFO	21416	NA	K04491	Tcf7l2	NA
66114	66114	Dnajc30	31.1	27.01	26.64	23.41	22.06	22.15	33.87	32.73	35.17	30.56	27.31	27.78	441	443	452	391	357	368	22.54	28.25	28.55	33.9233	372	445.333	-0.280203	0.544962	0.104971	Dnajc30	1300007M11Rik+++Wbscr18	mRNA	1	NM_025362	coding	known	NC_000071.6	135064206	135065365	+	5|5 G2	66114	NO_INFO	NO_INFO	66114	NA	NO_INFO	NA	NA
109225	109225	Ms4a7	0.48	0.92	0.59	0.75	0.41	0.65	0.52	1.11	0.78	0.98	0.51	0.82	8	18	12	15	8	13	0.603333	0.663333	0.77	0.803333	12	12.6667	-0.0663991	0.983897	0.908693	Ms4a7	9130422I10Rik+++A430103C15Rik+++CD20l4+++CFFMA	mRNA	3	NM_001025610+++NM_001276398+++NM_027836	coding	known	NC_000085.6	11321039	11336146	-	19|19 A	109225	NO_INFO	NO_INFO	109225	NA	NO_INFO	Ms4a7	NA
246257	246257	Ovca2	4.53	3.72	2.48	2.97	2.57	3.11	4.93	4.51	3.27	3.87	3.18	3.91	168.67	160.41	110.72	130.78	109.96	136.67	2.88333	3.57667	3.65333	4.23667	125.803	146.6	-0.26238	0.812032	0.335421	Ovca2	9030414M07Rik	mRNA	1	NM_027136	coding	known	NC_000077.6	75175943	75178808	-	11|11 B5	246257	NO_INFO	NO_INFO	246257	NA	NO_INFO	NA	NA
233328	233328	Lrrk1	1.8	2.3	2.45	1.94	1.64	1.67	1.96	2.79	3.23	2.54	2.03	2.09	148	242	292	199	168	177	1.75	2.18333	2.22	2.66	181.333	227.333	-0.308614	0.62201	0.14838	Lrrk1	AW319595+++C230002E15Rik+++D130026O16Rik+++mKIAA1790	mRNA	10	URS00009B41E6+++URS00009B6524+++URS00009C5BDD+++URS0000A9F386+++XR_391340+++NM_146191+++XM_006540838+++XM_006540839+++XM_006540840+++XM_006540841	coding	known	NC_000073.6	66258745	66388341	+	7|7 C	233328	NO_INFO	NO_INFO	233328	NA	NO_INFO	NA	NA
22652	22652	Mkrn3	0.11	0.14	0.14	0.05	0.07	0.02	0.12	0.17	0.18	0.06	0.09	0.03	4	6	6	2	3	1	0.0466667	0.13	0.06	0.156667	2	5.33333	-1.40665	0.662664	0.179182	Mkrn3	D7H15S9-1+++Zfp127	mRNA	1	NM_011746	coding	known	NC_000073.6	62417593	62420153	-	7 C|7 34.37 cM	22652	NO_INFO	NO_INFO	22652	NA	NO_INFO	NA	NA
17859	17859	Mxi1	8.18	9.44	8.66	11.77	10.39	10.03	8.91	11.44	11.43	15.35	12.86	12.58	269	383	363	491	421	416	10.73	8.76	13.5967	10.5933	442.667	338.333	0.388882	0.194086	0.0137206	Mxi1	Gm10197+++Mad2+++bHLHc11	mRNA	15	URS00009B1013+++URS00009B650B+++NM_001008542+++NM_001008543+++NM_001360345+++NM_001360346+++NM_001360347+++NM_001360348+++NM_010847+++XM_006526735+++XM_006526739+++XM_006526741+++XM_030250763+++XM_030250764+++XM_030250765	coding	known	NC_000085.6	53310128	53375565	+	19 D2|19 47.53 cM	17859	NO_INFO	NO_INFO	17859	NA	NO_INFO	Mxi1	NA
270163	270163	Myo9a	0.34	0.38	0.55	0.32	0.38	0.3	0.37	0.46	0.73	0.42	0.47	0.38	61	79	119	67	79	63	0.333333	0.423333	0.423333	0.52	69.6667	86.3333	-0.296187	0.779671	0.296564	Myo9a	4732465J09Rik+++C130068I12Rik+++C230003M11	mRNA	23	URS00009B1391+++URS00009B301D+++URS00009B57DD+++URS00009B8112+++URS00009BC1C3+++URS00009BD91E+++URS00009BF526+++URS00009BF9A7+++URS00009C038B+++URS00009C553D+++NM_173018+++XM_006511208+++XM_006511209+++XM_006511210+++XM_006511211+++XM_006511212+++XM_006511213+++XM_006511215+++XM_006511216+++XM_006511217+++XM_006511220+++XM_017313399+++XM_017313400	coding	known	NC_000075.6	59750848	59928866	+	9 B|9 32.13 cM	270163	NO_INFO	NO_INFO	270163	NA	NO_INFO	NA	NA
12393	12393	Runx2	0.05	0.07	0.02	0.05	0.02	0.02	0.05	0.09	0.03	0.07	0.03	0.03	4	7	2	6	2	2	0.03	0.0466667	0.0433333	0.0566667	3.33333	4.33333	-0.398971	0.952797	0.699872	Runx2	AML3+++Cbf+++Cbfa-1+++Cbfa1+++LS3+++Osf2+++PEBP2aA+++Pebp2a1+++Pebpa2a	mRNA	16	NR_073392+++NR_073425+++URS0000776211+++URS000077FC09+++URS00009B422C+++URS00009B7629+++URS00009BDEB9+++URS00009BF40E+++URS00009C3B8C+++URS00009C5E86+++NM_001145920+++NM_001146038+++NM_001271627+++NM_001271630+++NM_001271631+++NM_009820	coding	known	NC_000083.6	44495987	44814797	+	17 B3|17 21.33 cM	12393	NO_INFO	NO_INFO	12393	NA	K09278	Runx2	NA
20893	20893	Bhlhe40	19.48	42.42	48.89	32.64	19.3	19.39	21.22	51.41	64.54	42.59	23.89	24.32	868	2191	2613	1722	989	1019	23.7767	36.93	30.2667	45.7233	1243.33	1890.67	-0.564714	0.403863	0.0528466	Bhlhe40	Bhlhb2+++C130042M06Rik+++CR8+++Clast5+++Dec1+++Sharp2+++Stra13+++Stra14	mRNA	1	NM_011498	coding	known	NC_000072.6	108660629	108666925	+	6|6 E2	20893	NO_INFO	NO_INFO	20893	NA	K03729	Bhlhe40	NA
71206	71206	Katnal2	0	0	0	0.02	0	0.02	0	0	0	0.03	0	0.02	0	0	0	1	0	1	0.0133333	0	0.0166667	0	0.666667	0	1.83041	0.94991	0.607943	Katnal2	3110023G01Rik+++4933439B08Rik	mRNA	7	URS00009B65A5+++URS00009BBC6D+++XR_001782393+++NM_001368655+++NM_001368656+++NM_001368657+++NM_027721	coding	known	NC_000084.6	76975072	77047311	+	18|18 E3	71206	NO_INFO	NO_INFO	71206	NA	NO_INFO	NA	NA
26934	26934	Racgap1	0.22	0.42	0.58	0.28	0.63	0.21	0.24	0.51	0.76	0.36	0.77	0.26	9	20	29	14	30	10	0.373333	0.406667	0.463333	0.503333	18	19.3333	-0.0591825	0.986891	0.917105	Racgap1	AI227039+++AI327394+++Band25+++GTPase+++MgcRacGAP+++gtl11+++mKIAA1478	mRNA	8	URS00009B7CEB+++NM_001253808+++NM_001253809+++NM_012025+++XM_006521019+++XM_006521020+++XM_011245646+++XM_030248592	coding	known	NC_000081.6	99620496	99651656	-	15|15 F1	26934	NO_INFO	NO_INFO	26934	NA	NO_INFO	Racgap1	NA
331474	331474	Rtl5	0.13	0.19	0.29	0.07	0.15	0.13	0.14	0.23	0.38	0.09	0.19	0.17	8	14	22	5	11	10	0.116667	0.203333	0.15	0.25	8.66667	14.6667	-0.726107	0.737914	0.245926	Rtl5	6430402L03Rik+++Mar5+++Mart5+++Rgag4+++mKIAA2001	mRNA	2	NM_001278534+++XM_006528101	coding	known	NC_000086.7	102066542	102071307	-	X|X D	331474	NO_INFO	NO_INFO	331474	NA	NO_INFO	Rtl5	NA
103161	103161	Apof	233.59	247.25	220.44	222.23	182.21	204.05	254.4	299.62	291.02	290.01	225.53	255.88	7551.69	9262.44	8545.92	8499.73	6764.77	7771.87	202.83	233.76	257.14	281.68	7678.79	8453.35	-0.150469	0.764548	0.274716	Apof	AI255964	mRNA	1	NM_133997	coding	known	NC_000076.6	128268699	128271250	+	10 D3|10 76.5 cM	103161	NO_INFO	NO_INFO	103161	NA	NO_INFO	NA	NA
67186	67186	Rplp2	539.17	398.66	417.92	437.22	445.02	435.52	587.19	483.1	551.74	570.57	550.83	546.14	1756.49	1488.19	1609.87	1635.14	1594.53	1610.49	439.253	451.917	555.847	540.677	1613.39	1618.18	-0.0379407	0.962217	0.839301	Rplp2	2700049I22Rik	mRNA	3	NM_001360657+++NM_001360658+++NM_026020	coding	known	NC_000073.6	141447651	141451359	+	7|7 F5	67186	NO_INFO	NO_INFO	67186	NA	K02943	Rplp2	COG2058///NA
68176	68176	Inka1	0.55	0.55	0.33	0.81	0.55	0.68	0.6	0.66	0.44	1.05	0.69	0.85	7	8	5	12	8	10	0.68	0.476667	0.863333	0.566667	10	6.66667	0.564307	0.857805	0.405211	Inka1	6230427J02Rik+++Fam212a	mRNA	1	NM_026597	coding	known	NC_000075.6	107984223	107985916	-	9|9 F1	68176	NO_INFO	NO_INFO	68176	NA	NO_INFO	Inka1	NA
333424	333424	A4gnt	0	0.05	0.09	0.02	0	0.05	0	0.06	0.13	0.03	0	0.06	0	2	4	1	0	2	0.0233333	0.0466667	0.03	0.0633333	1	2	-0.924322	0.94991	0.604267	A4gnt	AV080780+++Alpha4gnt+++Gm798	mRNA	3	NM_001077424+++XM_006511244+++XM_006511246	coding	known	NC_000075.6	99591179	99622367	+	9|9 E3.3	333424	NO_INFO	NO_INFO	333424	NA	NO_INFO	NA	NA
83603	83603	Elovl4	0	0	0	0	0	0.02	0	0	0	0	0	0.02	0	0	0	0	0	1	0.00666667	0	0.00666667	0	0.333333	0	0.949827	0.952797	0.815937	Elovl4	NA	mRNA	1	NM_148941	coding	known	NC_000075.6	83778692	83806305	-	9|9 E2	83603	NO_INFO	NO_INFO	83603	NA	K10249	Elovl4	NA
69527	69527	Mrps9	11.5	12.29	11.91	12.79	14.36	15.11	12.53	14.89	15.72	16.69	17.77	18.95	210	259	260	275	299	323	14.0867	11.9	17.8033	14.38	299	243	0.296353	0.514616	0.0911739	Mrps9	2310002A08Rik+++AW322516+++Mrp-S9+++S9mt+++mg637	mRNA	3	NM_023514+++XM_006496257+++XM_030242824	coding	known	NC_000067.6	42851233	42905683	+	1|1 B	69527	NO_INFO	NO_INFO	69527	NA	K02996	Mrps9	COG0103///NA
70461	70461	Crtc3	2.24	2.27	2.3	2.47	2.28	2.09	2.43	2.75	3.03	3.23	2.82	2.63	169	199	209	222	198	187	2.28	2.27	2.89333	2.73667	202.333	192.333	0.0657388	0.952797	0.720673	Crtc3	2610312F20Rik+++6332415K15Rik+++AI429792+++BC011210+++TORC3	mRNA	4	URS00009B4324+++NM_173863+++XM_006541195+++XM_030242981	coding	known	NC_000073.6	80586627	80688948	-	7|7 D2- D3	70461	NO_INFO	NO_INFO	70461	NA	K16334	NA	NA
20509	20509	Slc19a1	2.89	4.23	4.75	4.55	3.45	4.6	3.15	5.12	6.27	5.93	4.28	5.76	90	154	180	169	124	170	4.2	3.95667	5.32333	4.84667	154.333	141.333	0.144373	0.930754	0.547817	Slc19a1	AI323572+++RFC+++RFC-1+++RFC1	mRNA	14	XR_003948631+++XR_003948632+++XR_003948633+++XR_003948634+++XR_003948635+++XR_003948636+++NM_001199271+++NM_031196+++XM_006513414+++XM_006513415+++XM_006513416+++XM_006513417+++XM_006513419+++XM_030244971	coding	known	NC_000076.6	77032269	77050432	+	10 C1|10 39.72 cM	20509	NO_INFO	NO_INFO	20509	NA	K14609	Slc19a1	NA
13845	13845	Ephb3	0.1	0.14	0.11	0.07	0.13	0.1	0.11	0.17	0.15	0.09	0.16	0.12	6	10	8	5	9	7	0.1	0.116667	0.123333	0.143333	7	8	-0.181505	0.952797	0.797878	Ephb3	AW456895+++Cek10+++Etk2+++HEK2+++MDK5+++Sek4+++Tyro6	mRNA	2	NM_010143+++XM_006521788	coding	known	NC_000082.6	21204620	21223309	+	16|16 B1	13845	NO_INFO	NO_INFO	13845	NA	K05112	Ephb3	NA
211712	211712	Pcdh9	0.04	0.01	0	0.03	0.01	0.02	0.04	0.01	0	0.04	0.01	0.03	3	1	0	3	1	2	0.02	0.0166667	0.0266667	0.0166667	2	1.33333	0.465731	0.952797	0.764111	Pcdh9	NA	mRNA	41	URS00009ADCAF+++URS00009AEE7A+++URS00009AEF9B+++URS00009AF3CF+++URS00009B1044+++URS00009B183C+++URS00009B24A8+++URS00009B41C7+++URS00009B5356+++URS00009B71C4+++URS00009B7227+++URS00009B7A3C+++URS00009B84AC+++URS00009B9A54+++URS00009BA8E6+++URS00009BAA0B+++URS00009BB315+++URS00009BC6B7+++URS00009BDBD6+++URS00009BDDE6+++URS00009BDFDF+++URS00009BE1CA+++URS00009BE49B+++URS00009C017E+++URS00009C1946++…	coding	known	NC_000080.6	93013700	93892834	-	14 E2.1|14 45.8 cM	211712	NO_INFO	NO_INFO	211712	NA	NO_INFO	Pcdh9	NA
16992	16992	Lta	0	0.1	0	0	0.1	0	0	0.12	0	0	0.12	0	0	2	0	0	2	0	0.0333333	0.0333333	0.04	0.04	0.666667	0.666667	0.112029	0.999812	0.968967	Lta	LT+++LT-[a]+++LT-alpha+++LT[a]+++LTalpha+++Ltx+++TNF-beta+++TNFSF1+++Tnfb+++Tnfsf1b+++Tnlg1e+++hlb382	mRNA	5	NM_010735+++XM_006523731+++rna-NM_010735.2-2+++rna-NM_010735.2-3+++rna-NM_010735.2-4	coding	known	NT_187004.1	1452850	35205578	-	17 B1|17 18.59 cM	16992	NO_INFO	NO_INFO	16992	NA	K05468	NA	NA
19155	19155	Npepps	5.67	4.62	5	5.62	6.02	4.78	6.17	5.6	6.61	7.33	7.46	6	270	282	339	365	359	306	5.47333	5.09667	6.93	6.12667	343.333	297	0.198747	0.759935	0.268502	Npepps	AAP-S+++MP100+++Psa+++R74825+++goku	mRNA	6	XR_879535+++NM_008942+++XM_011248802+++XM_030245668+++XM_030245669+++XM_030245670	coding	known	NC_000077.6	97205842	97280660	-	11 D|11 60.95 cM	19155	NO_INFO	NO_INFO	19155	NA	NO_INFO	NA	NA
11863	11863	Arnt	3.74	6.11	7.37	6.92	6.33	6.31	4.07	7.41	9.73	9.02	7.84	7.91	231	451	566	516	458	474	6.52	5.74	8.25667	7.07	482.667	416	0.246524	0.767633	0.27823	Arnt	D3Ertd557e+++Drnt+++ESTM42+++Hif1b+++W08714+++bHLHe2+++mKIAA4051	mRNA	14	URS00009B5F86+++URS00009BBAD0+++URS0000ADE3CD+++URS0000B0FABE+++XR_001783643+++XR_001783644+++NM_001037737+++NM_009709+++XM_006500930+++XM_006500931+++XM_006500933+++XM_030252391+++XM_030252392+++XM_030252393	coding	known	NC_000069.6	95434367	95497240	+	3 F2.1|3 40.74 cM	11863	NO_INFO	NO_INFO	11863	NA	K09097	NA	NA
100169864	100169864	Gm44504	3.65	5.26	6.83	5.54	4.65	3.78	3.97	6.38	9.01	7.23	5.76	4.74	53.23	86.47	114.66	93.63	75.53	64.22	4.65667	5.24667	5.91	6.45333	77.7933	84.7867	-0.108266	0.952797	0.704847	Gm44504	Gm38419+++Slc10a3-ubl4+++SlcUbl4a+++Tu11	mRNA	3	NR_103489+++NM_001278271+++NM_001278272	coding	known	NC_000086.7	74367447	74373349	-	X A7.3|X	100169864	NO_INFO	NO_INFO	100169864	NA	NO_INFO	NA	NA
74122	74122	Tmem43	1.82	3.22	2.67	2.38	2.68	2.9	1.98	3.91	3.52	3.1	3.32	3.64	75	154	132	116	127	141	2.65333	2.57	3.35333	3.13667	128	120.333	0.112278	0.952797	0.647211	Tmem43	1200015A22Rik+++LUMA	mRNA	1	NM_028766	coding	known	NC_000072.6	91473707	91488463	+	6|6 D1	74122	NO_INFO	NO_INFO	74122	NA	NO_INFO	Tmem43	NA
232164	232164	Paip2b	1.67	3.71	4.09	2.95	3.02	2.91	1.82	4.5	5.4	3.85	3.73	3.64	80	206	235	167	166	164	2.96	3.15667	3.74	3.90667	165.667	173.667	-0.0242432	0.992416	0.931769	Paip2b	NA	mRNA	2	NM_146169+++XM_006505971	coding	known	NC_000072.6	83806058	83831741	-	6|6 C3	232164	NO_INFO	NO_INFO	232164	NA	NO_INFO	NA	NA
78923	78923	Chsy3	0.64	1.01	1.14	0.72	0.68	0.94	0.69	1.22	1.5	0.94	0.84	1.18	36	66	77	48	44	63	0.78	0.93	0.986667	1.13667	51.6667	59.6667	-0.185592	0.93762	0.561061	Chsy3	4833446K15Rik+++AI662215	mRNA	4	URS00009B68A8+++URS00009BF08F+++URS00009C0BAF+++NM_001081328	coding	known	NC_000084.6	59175340	59411336	+	18|18 D3	78923	NO_INFO	NO_INFO	78923	NA	K13499	NA	NA
235606	235606	Apeh	21.46	27.67	27.02	26.16	25.05	26.13	23.37	33.53	35.67	34.14	31	32.76	699	1069	1080	1032	959	1025	25.78	25.3833	32.6333	30.8567	1005.33	949.333	0.0930024	0.917739	0.519262	Apeh	NA	mRNA	4	NM_146226+++XM_006511723+++XM_030244343+++XM_030244344	coding	known	NC_000075.6	108085413	108094490	-	9 F1|9 59.07 cM	235606	NO_INFO	NO_INFO	235606	NA	NO_INFO	NA	NA
102637366	102637366	Gm10037	0.21	0.2	0.16	0.2	0.06	0.23	0.22	0.25	0.2	0.27	0.08	0.29	2	3	4	6	2	8	0.163333	0.19	0.213333	0.223333	5.33333	3	0.835434	0.85566	0.398088	Gm10037	EG328280+++Rslcan24	mRNA	5	NM_001309373+++NM_001309374+++XM_017315332+++XM_017315333+++XM_017315334	coding	known	NC_000079.6	67830938	67844879	+	13|13 B3	102637366	NO_INFO	NO_INFO	102637366	NA	NO_INFO	NA	NA
72634	72634	Tdrkh	1.4	1.5	1.05	0.84	0.67	1.17	1.52	1.82	1.39	1.1	0.82	1.47	29	33	27	28	18	27	0.893333	1.31667	1.13	1.57667	24.3333	29.6667	-0.30329	0.878143	0.448286	Tdrkh	2700091C21Rik+++Tdrd2	mRNA	15	URS0000811FA6+++URS00009B1933+++XR_003954402+++XR_003954403+++XR_003954404+++NM_001357711+++NM_001357712+++NM_001357713+++NM_001357714+++NM_028307+++XM_017319744+++XM_017319745+++XM_017319748+++XM_030252842+++XM_030252843	coding	known	NC_000069.6	94413243	94434854	+	3|3 F2.1	72634	NO_INFO	NO_INFO	72634	NA	NO_INFO	NA	NA
56185	56185	Hao2	0.11	0.03	0.32	0	0	0	0.12	0.04	0.42	0	0	0	3	1	10	0	0	0	0	0.153333	0	0.193333	0	4.66667	-4.64693	0.154115	0.00947788	Hao2	AI325478+++Hao-2+++Hao3+++Haox3	mRNA	2	NM_019545+++XM_011240169	coding	known	NC_000069.6	98874519	98895376	-	3 F2.2|3 42.9 cM	56185	NO_INFO	NO_INFO	56185	NA	K11517	Hao2	NA
574428	574428	Zmynd15	1.68	1.74	1.24	1.05	1.46	1.77	1.83	2.1	1.64	1.37	1.8	2.23	53	66	46	44	51	63	1.42667	1.55333	1.8	1.85667	52.6667	55	-0.0735735	0.952813	0.81614	Zmynd15	NA	mRNA	14	URS00009BB7E4+++NM_001029929+++NM_001348337+++XM_006533830+++XM_006533832+++XM_006533833+++XM_006533834+++XM_006533835+++XM_006533836+++XM_011249160+++XM_017314688+++XM_030246195+++rna-NM_001029929.3-2+++rna-NM_001348337.1-2	coding	known	NT_187026.1	563868	70466204	+	11|11 B3	574428	NO_INFO	NO_INFO	574428	NA	NO_INFO	Zmynd15	NA
26901	26901	Ss18l2	79.28	74.29	58.41	50.66	59.36	59.32	86.34	90.02	77.12	66.12	73.47	74.39	332	357	290	245	276	284	56.4467	70.66	71.3267	84.4933	268.333	326.333	-0.302952	0.603457	0.137832	Ss18l2	1110020I04Rik+++AI463209+++Deb1	mRNA	3	URS00009AF86C+++URS00009BAC3D+++NM_026794	coding	known	NC_000075.6	121710346	121712921	+	9|9 F4	26901	NO_INFO	NO_INFO	26901	NA	NO_INFO	NA	NA
70551	70551	Tmtc4	0.46	0.85	0.89	0.73	0.84	0.97	0.51	1.03	1.17	0.96	1.04	1.21	25	48	54	42	48	57	0.846667	0.733333	1.07	0.903333	49	42.3333	0.234576	0.899637	0.48648	Tmtc4	4930403J22Rik+++5730419O14Rik	mRNA	22	NR_153663+++URS0000780360+++URS00009AD14D+++URS00009B65B7+++URS00009B8ECC+++NM_001360598+++NM_001360599+++NM_028651+++XM_006519510+++XM_006519511+++XM_017316182+++XM_017316183+++XM_017316185+++XM_030248003+++XM_030248004+++XM_030248005+++XM_030248006+++XM_030248007+++XM_030248008+++XM_030248009+++XM_030248010+++XM_030248012	coding	known	NC_000080.6	122918971	122983285	+	14|14 E5	70551	NO_INFO	NO_INFO	70551	NA	NO_INFO	Tmtc4	NA
69190	69190	Dym	15.53	19.58	17.42	17.38	19.9	18.35	16.91	23.73	23	22.68	24.63	23.01	539	787	724	713	792	751	18.5433	17.51	23.44	21.2133	752	683.333	0.144165	0.811174	0.334586	Dym	1810041M12Rik+++4933427L07Rik+++C030019K18Rik	mRNA	8	URS00009AFC1F+++URS00009C19B4+++XR_386014+++NM_027727+++XM_006526216+++XM_006526218+++XM_030250593+++XM_030250594	coding	known	NC_000084.6	75018699	75286966	+	18|18 E3	69190	NO_INFO	NO_INFO	69190	NA	NO_INFO	NA	NA
666173	666173	Vps13b	1.04	1.62	2.47	2.71	2.92	2.42	1.13	1.97	3.27	3.53	3.61	3.04	219	397	626	677	709	604	2.68333	1.71	3.39333	2.12333	663.333	414	0.717808	0.108673	0.00547913	Vps13b	1810042B05Rik+++2310042E16Rik+++4732488H20+++C330002D13Rik+++C87206+++Coh1+++D230005K13	mRNA	10	URS00009B010E+++URS00009B4527+++URS00009BB486+++URS00009BC8D7+++URS00009BF461+++URS00009C1EDB+++URS00009C2044+++URS00009C4B60+++URS00009C5DEF+++NM_177151	coding	known	NC_000081.6	35371118	35931229	+	15|15 B3.1	666173	NO_INFO	NO_INFO	666173	NA	NO_INFO	NA	NA
227449	227449	Zcchc2	4.3	4.64	5.83	4.83	4.6	4.01	4.68	5.63	7.7	6.3	5.69	5.02	381	472	616	512	467	425	4.48	4.92333	5.67	6.00333	468	489.667	-0.0615605	0.952797	0.725005	Zcchc2	9930114B20Rik+++AW212015	mRNA	11	NM_001122675+++NM_001122676+++XM_006529512+++XM_006529513+++XM_006529514+++XM_006529515+++XM_006529516+++XM_006529517+++XM_006529518+++XM_030253835+++XM_030253840	coding	known	NC_000067.6	105990390	106034077	+	1|1 E2.1	227449	NO_INFO	NO_INFO	227449	NA	NO_INFO	Zcchc2	NA
76527	76527	Il34	1.44	2.45	1.43	1.37	1.65	1.81	1.57	2.97	1.89	1.79	2.04	2.27	34	67	40	38	44	50	1.61	1.77333	2.03333	2.14333	44	47	-0.0828873	0.952797	0.808493	Il34	2010004A03Rik+++AI593503	mRNA	10	NM_001135100+++NM_029646+++XM_006531479+++XM_006531480+++XM_006531483+++XM_006531484+++XM_006531485+++XM_006531486+++XM_030243837+++XM_030243838	coding	known	NC_000074.6	110741829	110805949	-	8|8 E1	76527	NO_INFO	NO_INFO	76527	NA	K22633	Il34	NA
108159	108159	Ubxn8	9.17	9.25	9.08	8.29	8.13	7.96	9.99	11.21	11.99	10.81	10.06	9.98	368	430	436	395	374	377	8.12667	9.16667	10.2833	11.0633	382	411.333	-0.115309	0.880628	0.453365	Ubxn8	D0H8S2298E+++Rep-8+++Rep8h+++Ubxd6	mRNA	3	URS00009BE14C+++NM_178648+++XM_006508980	coding	known	NC_000074.6	33619586	33645476	+	8|8 A4	108159	NO_INFO	NO_INFO	108159	NA	K24351	NA	NA
319195	319195	Rpl17	1130	891.51	627.11	549.92	664.45	723.4	1230.65	1080.34	827.91	717.64	822.43	907.13	9268	8438	6138	5281	6165	6899	645.923	882.873	815.733	1046.3	6115	7948	-0.419622	0.476031	0.0757204	Rpl17	NA	mRNA	4	NM_001002239+++XM_006525996+++XM_017317918+++XM_017317919	coding	known	NC_000084.6	74998978	75003381	+	18|18 E3	319195	NO_INFO	NO_INFO	319195	NA	K02880	Rpl17	NA
545814	545814	Smok3a	0	0.03	0.06	0	0	0.03	0	0.04	0.07	0	0	0.04	0	1	2	0	0	1	0.01	0.03	0.0133333	0.0366667	0.333333	1	-1.39853	0.944835	0.588226	Smok3a	Smok2b1	mRNA	2	NM_001126045+++NM_001168602	coding	known	NC_000071.6	138021276	138034665	+	5|5 G2	545814	NO_INFO	NO_INFO	545814	NA	NO_INFO	NA	NA
71148	71148	Mier1	2.71	3.29	3.22	3.24	3.45	3.23	2.95	3.99	4.25	4.22	4.28	4.05	186	262	266	264	274	263	3.30667	3.07333	4.18333	3.73	267	238	0.170777	0.797249	0.31885	Mier1	4933425I22Rik+++5830411K19Rik+++er1	mRNA	17	URS00009AD020+++URS00009B43D4+++URS00009BE06D+++URS00009C3D55+++NM_001039081+++NM_001286221+++NM_001286222+++NM_001286223+++NM_027696+++XM_006503398+++XM_006503399+++XM_006503401+++XM_006503402+++XM_030253776+++XM_030253777+++XM_030253778+++XM_030253779	coding	known	NC_000070.6	103114324	103165754	+	4|4 C6	71148	NO_INFO	NO_INFO	71148	NA	NO_INFO	NA	NA
381560	381560	Xkr8	0.93	1.48	1.42	1.39	0.69	1.14	1.02	1.79	1.88	1.82	0.86	1.43	58	105	106	101	50	82	1.07333	1.27667	1.37	1.56333	77.6667	89.6667	-0.195238	0.917739	0.518426	Xkr8	4931440N07Rik+++AI597014+++Gm1031+++XRG8+++mXkr8	mRNA	3	NM_201368+++XM_006538988+++XM_006538989	coding	known	NC_000070.6	132724901	132732614	-	4|4 D2.3	381560	NO_INFO	NO_INFO	381560	NA	NO_INFO	NA	NA
65019	65019	Rpl23	281.81	258.18	200.67	233.98	250.24	250.81	306.91	312.87	264.92	305.34	309.73	314.51	3567.05	3778.17	3037.58	3483.83	3608.67	3713.75	245.01	246.887	309.86	294.9	3602.08	3460.93	0.0317651	0.969022	0.859047	Rpl23	2810009A01Rik	mRNA	2	URS00009B08DC+++NM_022891	coding	known	NC_000077.6	97777526	97782439	-	11 D|11 61.1 cM	65019	NO_INFO	NO_INFO	65019	NA	K02894	Rpl23	COG0093///NA
14208	14208	Ppm1g	16.27	20.04	17.82	22.29	17.77	18.86	17.72	24.28	23.53	29.09	21.99	23.65	485	692	637	786	608	662	19.64	18.0433	24.91	21.8433	685.333	604.667	0.180048	0.73293	0.242719	Ppm1g	AI385652+++Fin13	mRNA	1	NM_008014	coding	known	NC_000071.6	31202668	31220545	-	5 B1|5 17.27 cM	14208	NO_INFO	NO_INFO	14208	NA	NO_INFO	Ppm1g	NA
64934	64934	Pes1	8.74	12.98	12.86	13.38	10.88	11.71	9.52	15.73	16.98	17.46	13.47	14.69	362	623	639	656	518	572	11.99	11.5267	15.2067	14.0767	582	541.333	0.120599	0.909031	0.501328	Pes1	NA	mRNA	1	NM_022889	coding	known	NC_000077.6	3963975	3980004	+	11|11 A1	64934	NO_INFO	NO_INFO	64934	NA	NO_INFO	NA	NA
14622	14622	Gjb5	0	0.04	0	0.04	0	0.04	0	0.05	0	0.05	0	0.05	0	1	0	1	0	1	0.0266667	0.0133333	0.0333333	0.0166667	0.666667	0.333333	0.870484	0.952797	0.759149	Gjb5	Cnx31.1+++Cx31.1+++Cxna+++Gjb-5	mRNA	1	NM_010291	coding	known	NC_000070.6	127354809	127358164	-	4 D2.2|4 61.51 cM	14622	NO_INFO	NO_INFO	14622	NA	NO_INFO	Gjb5	NA
73233	73233	Zfp942	3.4	3.22	2.44	2.27	2.71	2.3	3.71	3.91	3.22	2.96	3.36	2.89	152	166	136	125	143	125	2.42667	3.02	3.07	3.61333	131	151.333	-0.225905	0.799253	0.320693	Zfp942	3110048L19Rik	mRNA	11	URS00009B0E8E+++URS00009B9125+++URS00009C049C+++NM_001199048+++XM_030250072+++XM_030250073+++XM_030250074+++XM_030250075+++XM_030250076+++XM_030250077+++XM_030250078	coding	known	NC_000083.6	21926960	21962503	-	17|17 A3.3	73233	NO_INFO	NO_INFO	73233	NA	NO_INFO	NA	NA
26941	26941	Slc9a3r1	75.64	122.04	120.18	153.46	133.94	124.11	82.38	147.89	158.67	200.27	165.78	155.63	1969	3680	3750	4722	3999	3802	137.17	105.953	173.893	129.647	4174.33	3133	0.437476	0.214054	0.0162658	Slc9a3r1	EBP-50+++NHE-RF+++NHERF-1+++NHERF1	mRNA	1	NM_012030	coding	known	NC_000077.6	115163341	115181178	+	11|11 E2	26941	NO_INFO	NO_INFO	26941	NA	K13365	Slc9a3r1	NA
385674	385674	Zfp174	0.53	0.32	0.38	0.57	0.59	0.49	0.58	0.39	0.51	0.75	0.73	0.61	47	30	35	53	57	51	0.55	0.41	0.696667	0.493333	53.6667	37.3333	0.483788	0.650898	0.170196	Zfp174	Gm1754	mRNA	3	URS00009ADB2C+++NM_001081217+++XM_011245945	coding	known	NC_000082.6	3847190	3872455	+	16|16 A1	385674	NO_INFO	NO_INFO	385674	NA	NO_INFO	NA	NA
66834	66834	Acot13	169.88	102.95	91.45	101.17	118.09	120.95	185.01	124.75	120.73	132.02	146.16	151.67	1157	808	742	804	906	954	113.403	121.427	143.283	143.497	888	902.333	-0.0792645	0.952797	0.758195	Acot13	0610006O17Rik+++Them2	mRNA	1	NM_025790	coding	known	NC_000079.6	24817955	24831489	-	13|13 A3.1	66834	NO_INFO	NO_INFO	66834	NA	NO_INFO	Acot13	NA
117590	117590	Asb10	0	0	0.03	0	0	0.03	0	0	0.04	0	0	0.03	0	0	1	0	0	1	0.01	0.01	0.01	0.0133333	0.333333	0.333333	-0.0119435	0.999812	0.99738	Asb10	Asb-10+++BB137407	mRNA	2	NM_001310476+++NM_080444	coding	known	NC_000071.6	24532697	24540978	-	5|5 A3	117590	NO_INFO	NO_INFO	117590	NA	NO_INFO	NA	NA
18631	18631	Pex11a	45.36	44.89	49.57	76.41	68.47	61.72	49.4	54.39	65.44	99.71	84.75	77.39	1448	1655	1890	2874	2499	2311	68.8667	46.6067	87.2833	56.41	2561.33	1664.33	0.613679	0.0018297	2.06515e-05	Pex11a	PEX11alpha	mRNA	4	NR_153403+++URS00009C60C2+++NM_011068+++XM_011250824	coding	known	NC_000073.6	79735957	79743131	+	7|7 D2	18631	NO_INFO	NO_INFO	18631	NA	K13351	NA	NA
56195	56195	Ptbp2	2.44	1.46	0.92	1.46	1.94	1.86	2.65	1.77	1.21	1.91	2.4	2.33	118	82	54	84	108	108	1.75333	1.60667	2.21333	1.87667	100	84.6667	0.179619	0.952565	0.612773	Ptbp2	Ptb2+++brPTB+++nPTB	mRNA	13	URS000081189A+++URS00009BE7FB+++URS00009C23F6+++URS00009C3B05+++URS0000ADD840+++XR_001783718+++XR_001783719+++XR_375549+++XR_375550+++NM_001310711+++NM_019550+++XM_006501731+++XM_006501732	coding	known	NC_000069.6	119718741	119784647	-	3|3 G1	56195	NO_INFO	NO_INFO	56195	NA	NO_INFO	Ptbp2	NA
80797	80797	Clca3a2	0	0	0	0.03	0	0.03	0	0	0	0.04	0	0.04	0	0	0	1	0	1.02	0.02	0	0.0266667	0	0.673333	0	1.83041	0.94991	0.607943	Clca3a2	Clca2	mRNA	5	URS0000811971+++NM_030601+++XM_006502346+++XM_017319811+++XM_017319812	coding	known	NC_000069.6	144780581	144819623	+	3|3 H2	80797	NO_INFO	NO_INFO	80797	NA	K05030	NA	NA
110058	110058	Syt17	0	0.07	0.02	0	0	0.07	0	0.09	0.03	0	0	0.09	0	3	1	0	0	3	0.0233333	0.03	0.03	0.04	1	1.33333	-0.321998	0.976044	0.880681	Syt17	Bk+++sytXVII	mRNA	8	NM_001362179+++NM_001362180+++NM_138649+++XM_006507202+++XM_006507203+++XM_006507204+++XM_030241986+++XM_030241987	coding	known	NC_000073.6	118380713	118448583	-	7 F1|7 63.44 cM	110058	NO_INFO	NO_INFO	110058	NA	NO_INFO	NA	NA
72230	72230	Zfp558	0.2	0.11	0.06	0.11	0.03	0.13	0.21	0.14	0.08	0.14	0.04	0.16	11	7	4	7	2	8	0.09	0.123333	0.113333	0.143333	5.66667	7.33333	-0.441386	0.948286	0.598076	Zfp558	1700007A21Rik+++4932704I17Rik+++Zfp558-ps	mRNA	14	NM_028160+++NM_028935+++XM_011242609+++XM_011242610+++XM_017313602+++XM_017313603+++XM_017313604+++XM_030244624+++XM_030244625+++XM_030244626+++XM_030244627+++XM_030244628+++XM_030244629+++XM_030244630	coding	known	NC_000075.6	18453558	18478301	-	9|9 A2	72230	NO_INFO	NO_INFO	72230	NA	K09228	NA	NA
381104	381104	Prickle4	1.18	0.66	0.92	0.5	0.29	0.69	1.28	0.8	1.22	0.65	0.37	0.87	22	14	20	11	6	15	0.493333	0.92	0.63	1.1	10.6667	18.6667	-0.8449	0.599165	0.135641	Prickle4	Gm939	mRNA	2	NM_001290337+++XM_030249869	coding	known	NC_000083.6	47688474	47694910	-	17|17 C	381104	NO_INFO	NO_INFO	381104	NA	K04511	NA	NA
105244831	105244831	Gm40367	2.71	2.59	1.77	0.74	0.34	0.68	2.95	3.14	2.33	0.97	0.42	0.85	81.5	90.36	63.63	26.45	11.81	23.95	0.586667	2.35667	0.746667	2.80667	20.7367	78.4967	-1.99302	2.67176e-05	1.59063e-07	Gm40367	NA	mRNA	1	XM_030255697	coding	known	NC_000072.6	47662592	47665812	+	6 B2.3|6	105244831	NO_INFO	NO_INFO	105244831	NA	NO_INFO	NA	NA
223864	223864	Rapgef3	0.78	0.99	0.71	0.83	0.77	0.83	0.85	1.2	0.94	1.08	0.96	1.04	37	60	45	47	47	50	0.81	0.826667	1.02667	0.996667	48	47.3333	0.0242213	0.994709	0.937189	Rapgef3	2310016P22Rik+++9330170P05Rik+++Epac+++Epac1	mRNA	17	XR_001781519+++XR_003951370+++XR_875292+++XR_875293+++NM_001177810+++NM_001177811+++NM_001357630+++NM_144850+++XM_006520876+++XM_011245602+++XM_011245603+++XM_017316582+++XM_017316583+++XM_017316584+++XM_017316585+++XM_030248523+++XM_030248524	coding	known	NC_000081.6	97744770	97768419	-	15|15 F1	223864	NO_INFO	NO_INFO	223864	NA	K08014	NA	NA
102631705	102631705	Gm29975	0.01	0	0	0	0	0	0.01	0	0	0.01	0	0	4	0	0	2	0	1	0	0.00333333	0.00333333	0.00333333	1	1.33333	-0.643104	0.952797	0.759808	Gm29975	NA	mRNA	14	URS00009B9FC8+++XM_006520208+++XM_006520210+++XM_006520211+++XM_006520212+++XM_006520213+++XM_006520214+++XM_006520217+++XM_006520218+++XM_006520219+++XM_006520220+++XM_017316824+++XM_017316825+++XM_017316826	coding	known	NC_000081.6	27970010	27995082	-	15 B1|15	102631705	NO_INFO	NO_INFO	102631705	NA	NO_INFO	NA	NA
101206	101206	Tada3	10.64	10.77	8.33	6.4	6.95	5.87	11.59	13.05	11	8.36	8.6	7.36	278	338	276	205	212	189	6.40667	9.91333	8.10667	11.88	202	297.333	-0.569927	0.0662569	0.00262973	Tada3	1110004B19Rik+++ADA3+++AI987856+++Tada3l	mRNA	3	NM_133932+++XM_006505238+++XM_006505239	coding	known	NC_000072.6	113366640	113378005	-	6|6 E3	101206	NO_INFO	NO_INFO	101206	NA	K11315	NA	NA
69125	69125	Cnot8	14.13	12.4	10.66	10.95	12.01	10.91	15.39	15.02	14.07	14.29	14.87	13.68	323	388	361	360	385	360	11.29	12.3967	14.28	14.8267	368.333	357.333	0.0357125	0.957714	0.82709	Cnot8	1500015I04Rik+++1810022F04Rik+++AA536816+++AU015770+++AU043059	mRNA	20	URS00009ADB31+++URS00009AF437+++URS00009B037E+++URS00009B2730+++URS00009BA2E3+++URS00009BD4CA+++URS00009C08C9+++URS00009C1C6D+++URS00009C2C8A+++NM_001356477+++NM_001363084+++NM_001363085+++NM_001363086+++NM_026949+++XM_006534102+++rna-NM_001356477.2-2+++rna-NM_001363084.1-2+++rna-NM_001363085.1-2+++rna-NM_001363086.1-2+++rna-NM_026949.5-2	coding	known	NT_187029.1	183343	58118597	+	11|11 B1.3	69125	NO_INFO	NO_INFO	69125	NA	K12581	Cnot8	NA
16870	16870	Lhx2	2.9	2.37	2.49	2.19	1.8	2.22	3.16	2.87	3.29	2.86	2.22	2.78	85	84	96	87	65	89	2.07	2.58667	2.62	3.10667	80.3333	88.3333	-0.153343	0.932669	0.552619	Lhx2	LH2A+++Lh-2+++Lim2+++ap+++apterous	mRNA	8	NM_001290646+++NM_010710+++XM_006497733+++XM_006497734+++XM_006497735+++XM_006497736+++XM_006497738+++XM_006497739	coding	known	NC_000068.7	38339271	38369737	+	2|2 B	16870	NO_INFO	NO_INFO	16870	NA	NO_INFO	NA	NA
99526	99526	Usp53	0.99	1	1.32	1.01	1.41	1.46	1.07	1.21	1.75	1.32	1.74	1.83	76	90	111	91	121	126	1.29333	1.10333	1.63	1.34333	112.667	92.3333	0.290643	0.738999	0.246991	Usp53	AA939927+++Phxr3+++Sp6+++mKIAA1350+++mbo	mRNA	11	URS00009BE14F+++NM_133857+++XM_011240313+++XM_011240314+++XM_011240315+++XM_011240316+++XM_011240317+++XM_017319820+++XM_030252940+++XM_030252941+++XM_030252942	coding	known	NC_000069.6	122931486	122984900	-	3|3 G1	99526	NO_INFO	NO_INFO	99526	NA	NO_INFO	Usp53	NA
56438	56438	Rbx1	25.78	22.18	17.43	15.17	17.91	18.31	28.07	26.88	23.01	19.8	22.17	22.96	564	562	457	392	449	471	17.13	21.7967	21.6433	25.9867	437.333	527.667	-0.298545	0.630771	0.154326	Rbx1	1500002P15Rik+++AA517855+++ROC1	mRNA	1	NM_019712	coding	known	NC_000081.6	81466316	81476369	+	15|15 E1	56438	NO_INFO	NO_INFO	56438	NA	K03868	NA	COG5194///NA
67023	67023	Use1	87.45	84.59	57.28	49.23	59.86	54.73	95.24	102.5	75.62	64.25	74.1	68.64	853	956	668	565	664	632	54.6067	76.44	68.9967	91.12	620.333	825.667	-0.436064	0.340448	0.0373912	Use1	2010315L10Rik+++5730403H22Rik+++AV002165+++D12+++Ed2+++Q-snare+++p31	mRNA	3	NM_001145780+++NM_025917+++XM_006509726	coding	known	NC_000074.6	71366848	71369732	+	8|8 B3.3	67023	NO_INFO	NO_INFO	67023	NA	K08507	Use1	NA
102502	102502	Pls1	0.22	0.08	0.2	0.11	0.24	0.11	0.24	0.1	0.27	0.15	0.3	0.14	12	5	13	7	15	7	0.153333	0.166667	0.196667	0.203333	9.66667	10	-0.0769472	0.984664	0.911205	Pls1	AI427122	mRNA	4	NM_001033210+++XM_006510746+++XM_006510747+++XM_006510748	coding	known	NC_000075.6	95752642	95845306	-	9|9 E3.3	102502	NO_INFO	NO_INFO	102502	NA	NO_INFO	Pls1	NA
56407	56407	Trpc4ap	23.42	38.21	39.82	38.87	37.3	34.15	25.5	46.3	52.57	50.72	46.16	42.82	1074	2031	2191	2111	1967	1847	36.7733	33.8167	46.5667	41.4567	1975	1765.33	0.189288	0.795431	0.31615	Trpc4ap	4833429F06Rik+++D2Ertd113e+++Trrp4ap+++mFLJ00177+++truss	mRNA	2	NM_001163452+++NM_019828	coding	known	NC_000068.7	155634277	155692384	-	2 H1|2 77.26 cM	56407	NO_INFO	NO_INFO	56407	NA	NO_INFO	Trpc4ap	NA
68738	68738	Acss1	0.06	0.13	0.08	0.05	0.05	0.02	0.06	0.16	0.11	0.06	0.06	0.02	3	8	5	3	3	1	0.04	0.09	0.0466667	0.11	2.33333	5.33333	-1.17006	0.747779	0.257375	Acss1	1110032O15Rik+++AI788978+++Acas2+++Acas2l+++AceCS2	mRNA	2	URS00009BA866+++NM_080575	coding	known	NC_000068.7	150618111	150668240	-	2|2 G3	68738	NO_INFO	NO_INFO	68738	NA	K01895	Acss1	COG0365///NA
66707	66707	Nkapl	0.21	0.23	0.27	0	0.05	0.05	0.23	0.28	0.35	0	0.06	0.06	4	5	6	0	1	1	0.0333333	0.236667	0.04	0.286667	0.666667	5	-2.89808	0.358209	0.0410968	Nkapl	4921504I05Rik	mRNA	1	NM_025719	coding	known	NC_000079.6	21467047	21468501	-	13|13 A3.1	66707	NO_INFO	NO_INFO	66707	NA	NO_INFO	NA	NA
22704	22704	Zfp46	1.13	1.31	0.99	0.91	0.9	0.99	1.23	1.59	1.3	1.18	1.11	1.25	77	104	81	74	70	80	0.933333	1.14333	1.18	1.37333	74.6667	87.3333	-0.231772	0.831848	0.357865	Zfp46	AI426962+++Mlz-4+++Zfp-46+++Znf436	mRNA	6	NM_001356308+++NM_001370651+++NM_009557+++XM_006538728+++XM_006538732+++XM_011250229	coding	known	NC_000070.6	136284168	136293942	+	4 D3|4 68.34 cM	22704	NO_INFO	NO_INFO	22704	NA	K09228	Zfp46	NA
20747	20747	Spop	15.99	25.19	24.47	22.46	20.63	20.47	17.42	30.53	32.3	29.31	25.53	25.67	662	1221	1235	1114	992	1006	21.1867	21.8833	26.8367	26.75	1037.33	1039.33	0.0198739	0.984634	0.911115	Spop	AI315626+++Pcif1+++TEF2	mRNA	4	URS00009BB9E2+++URS00009BD7C5+++NM_001359107+++NM_025287	coding	known	NC_000077.6	95414083	95495749	+	11 D|11 59.01 cM	20747	NO_INFO	NO_INFO	20747	NA	K10523	Spop	NA
268780	268780	Egflam	0.08	0.14	0.03	0.09	0.14	0.1	0.09	0.17	0.04	0.11	0.17	0.13	4	9	2	6	10	7	0.11	0.0833333	0.136667	0.1	7.66667	5	0.624443	0.878143	0.448411	Egflam	5930412K08+++AU040377	mRNA	10	URS00009B02F7+++URS00009B0F0E+++URS00009B1C10+++URS00009BCA51+++NM_001289496+++NM_001289498+++NM_178748+++XM_006519991+++XM_017316628+++XM_017316629	coding	known	NC_000081.6	7206120	7411382	+	15|15 A1	268780	NO_INFO	NO_INFO	268780	NA	NO_INFO	Egflam	NA
74106	74106	Dcaf6	8.45	7.35	13.38	16.23	13.73	12.63	9.2	8.9	17.66	21.18	16.99	15.84	377	400	766	887	731	705	14.1967	9.72667	18.0033	11.92	774.333	514.333	0.598079	0.177322	0.0118462	Dcaf6	1200006M05Rik+++Iqwd1+++PC326	mRNA	16	URS0000811C24+++URS00009AF98D+++URS00009B13E4+++URS00009B17A7+++URS00009B3A73+++XR_001778389+++XR_373618+++XR_865654+++NM_028759+++XM_006497004+++XM_006497005+++XM_006497006+++XM_006497008+++XM_030243201+++XM_030243203+++XM_030243204	coding	known	NC_000067.6	165327327	165460906	+	1|1 H2.2- H2.3	74106	NO_INFO	NO_INFO	74106	NA	NO_INFO	NA	NA
14064	14064	F2rl2	0.03	0.03	0	0.02	0	0	0.03	0.03	0	0.03	0	0	1	1	0	1	0	0	0.00666667	0.02	0.01	0.02	0.333333	0.666667	-0.957773	0.952797	0.731372	F2rl2	F730031A08+++PAR3	mRNA	1	NM_010170	coding	known	NC_000079.6	95696920	95702768	+	13 D1|13 50.38 cM	14064	NO_INFO	NO_INFO	14064	NA	K04235	NA	NA
67305	67305	Gpx7	2.53	2.01	1.72	2.71	3.79	2.95	2.76	2.44	2.28	3.54	4.69	3.7	38	35	31	48	65	52	3.15	2.08667	3.97667	2.49333	55	34.6667	0.64536	0.418681	0.0570562	Gpx7	3110050F08Rik+++AI327032+++GPX6	mRNA	1	NM_024198	coding	known	NC_000070.6	108400217	108406713	-	4|4 C7	67305	NO_INFO	NO_INFO	67305	NA	K00432	NA	COG0386///NA
73132	73132	Slc25a16	9.66	12.63	14.21	15.02	13.99	13.91	10.52	15.3	18.76	19.59	17.32	17.45	426	656	766	793	717	734	14.3067	12.1667	18.12	14.86	748	616	0.295031	0.487359	0.0801439	Slc25a16	3110021G18Rik+++GDA+++GDC+++HGT.1+++ML7	mRNA	4	URS00009B564B+++URS00009C3005+++NM_175194+++XM_030245305	coding	known	NC_000076.6	62920632	62946494	+	10|10 B4	73132	NO_INFO	NO_INFO	73132	NA	NO_INFO	NA	NA
51869	51869	Rif1	0.57	0.57	0.66	0.59	0.4	0.48	0.63	0.69	0.88	0.77	0.49	0.61	108	121	157	126	86	102	0.49	0.6	0.623333	0.733333	104.667	128.667	-0.304101	0.688986	0.20089	Rif1	5730435J01Rik+++6530403D07Rik+++AU016181+++AW549474+++D2Ertd145e	mRNA	9	URS00009BDA23+++NM_001355414+++NM_001355415+++NM_175238+++XM_006498179+++XM_011239135+++XM_011239136+++XM_011239137+++XM_030251862	coding	known	NC_000068.7	52072815	52126769	+	2 C1.1|2 29.98 cM	51869	NO_INFO	NO_INFO	51869	NA	K11138	NA	NA
14377	14377	G6pc	159.86	159.02	149.82	256.89	307.63	286.43	174.1	192.7	197.8	335.24	380.78	359.18	4999	5762	5618	9503	11046	10551	283.65	156.233	358.4	188.2	10366.7	5459.67	0.915709	1.3016e-07	3.47093e-10	G6pc	AW107337+++G6Pase+++G6pc1+++G6pt+++Glc-6-Pase	mRNA	1	NM_008061	coding	known	NC_000077.6	101367716	101377903	+	11|11 D	14377	NO_INFO	NO_INFO	14377	NA	K01084	G6pc	NA
232536	232536	Mrps35	26.84	25.56	18.58	21.7	22.38	22.55	29.24	30.98	24.53	28.32	27.7	28.27	341	377	283	326	324	336	22.21	23.66	28.0967	28.25	328.667	333.667	-0.0446115	0.957046	0.82522	Mrps35	MDSO23+++MRP-S28+++MRPS28	mRNA	7	URS00009BBBED+++XR_869605+++NM_145573+++XM_006507035+++XM_006507037+++XM_017321561+++rna-NM_145573.2-2	coding	known	NT_166305.2	3537843	147073991	+	6|6 G3	232536	NO_INFO	NO_INFO	232536	NA	NO_INFO	NA	NA
239591	239591	Ttll8	1.44	0.85	1.25	2.34	1.78	1.77	1.57	1.03	1.65	3.05	2.2	2.22	80	55	85	155	116	116	1.96333	1.18	2.49	1.41667	129	73.3333	0.783383	0.108268	0.00539308	Ttll8	1700019P01Rik+++4933401B17	mRNA	12	URS0000773245+++URS000077A4E2+++URS0000781536+++URS00009B5CDA+++NM_001357736+++NM_172818+++XM_006520955+++XM_006520956+++XM_006520959+++XM_011245621+++XM_011245622+++XM_011245623	coding	known	NC_000081.6	88889778	88955051	+	15|15 E3	239591	NO_INFO	NO_INFO	239591	NA	NO_INFO	Ttll8	NA
12978	12978	Csf1r	13.63	23.21	24.69	17.51	16.5	13.86	14.85	28.13	32.59	22.85	20.42	17.39	769	1518	1671	1170	1071	923	15.9567	20.51	20.22	25.19	1054.67	1319.33	-0.29299	0.638179	0.159279	Csf1r	AI323359+++CD115+++CSF-1R+++Csfmr+++Fim-2+++Fim2+++Fms+++M-CSF-R+++M-CSFR	mRNA	1	NM_001037859	coding	known	NC_000084.6	61105572	61131139	+	18 E1|18 34.41 cM	12978	NO_INFO	NO_INFO	12978	NA	K05090	Csf1r	NA
56050	56050	Cyp39a1	4.95	6.16	9.54	12.75	10.47	10.51	5.39	7.46	12.59	16.64	12.96	13.18	220	317	508	671	535	551	11.2433	6.88333	14.26	8.48	585.667	348.333	0.769655	0.0319531	0.000879826	Cyp39a1	mCYP39A1	mRNA	3	NM_001285947+++NM_001285948+++NM_018887	coding	known	NC_000083.6	43667372	43751431	+	17|17 B3	56050	NO_INFO	NO_INFO	56050	NA	K07439	Cyp39a1	NA
20981	20981	Syt3	2.55	3.06	1.89	2.91	1.48	2.04	2.78	3.71	2.49	3.79	1.83	2.56	91	127	81	123	60	85	2.14333	2.5	2.72667	2.99333	89.3333	99.6667	-0.176005	0.938322	0.563811	Syt3	AI385753+++sytIII	mRNA	9	NM_001114116+++NM_016663+++XM_006540755+++XM_017322087+++XM_017322088+++XM_017322089+++XM_030242317+++XM_030242318+++XM_030242319	coding	known	NC_000073.6	44382773	44400030	+	7 B3|7 28.83 cM	20981	NO_INFO	NO_INFO	20981	NA	NO_INFO	Syt3	NA
18951	18951	2024-09-05	0.74	1.86	0.54	1.05	0.4	0.4	0.81	2.26	0.71	1.38	0.49	0.5	21.6	63	17.94	34.56	12.66	13	0.616667	1.04667	0.79	1.26	20.0733	34.18	-0.765344	0.664562	0.180349	2024-09-05	Cdcrel-1+++Cdcrel1+++Pnutl1+++Sept5	mRNA	2	NM_213614+++rna-NM_213614.2-2	coding	known	NT_187013.1	78914	18629938	-	16 A3|16 11.53 cM	18951	NO_INFO	NO_INFO	18951	NA	K04557	NA	NA
102641463	102641463	Gm17175	0.03	0	0	0	0	0	0.04	0	0	0	0	0	1	0	0	0	0	0	0	0.01	0	0.0133333	0	0.333333	-0.973727	0.952797	0.811392	Gm17175	NA	mRNA	1	XM_017316274	coding	known	NC_000080.6	51563960	51574053	-	14 C1|14 26.58 cM	102641463	NO_INFO	NO_INFO	102641463	NA	NO_INFO	NA	NA
20692	20692	Sparc	23.77	34.45	25.94	26.44	25.64	30.97	25.89	41.74	34.25	34.5	31.74	38.84	712	1209	935	936	880	1075	27.6833	28.0533	35.0267	33.96	963.667	952	0.0277898	0.97322	0.872041	Sparc	BM-40+++ON	mRNA	4	URS00009C31E6+++NM_001290817+++NM_009242+++XM_030245730	coding	known	NC_000077.6	55394159	55420080	-	11 B1.3|11 33.04 cM	20692	NO_INFO	NO_INFO	20692	NA	NO_INFO	Sparc	NA
71640	71640	Zfp949	1.5	1.38	1.33	2.03	1.68	1.74	1.63	1.67	1.76	2.65	2.09	2.18	75	79	78	120	96	102	1.81667	1.40333	2.30667	1.68667	106	77.3333	0.438771	0.457303	0.0702128	Zfp949	4930422I07Rik+++Nczf	mRNA	11	URS00009B24E1+++URS00009BE472+++NM_001142943+++NM_001163061+++XM_006511446+++XM_017313596+++XM_030244604+++XM_030244605+++XM_030244606+++XM_030244607+++XM_030244608	coding	known	NC_000075.6	88548020	88571086	+	9|9 E3.1	71640	NO_INFO	NO_INFO	71640	NA	K09228	NA	NA
67704	67704	1810037I17Rik	32.42	21.79	15.3	15.49	21.28	19.59	35.31	26.4	20.2	20.21	26.34	24.56	367	285	207	206	274	259	18.7867	23.17	23.7033	27.3033	246.333	286.333	-0.268916	0.829247	0.353686	1810037I17Rik	5730414I01Rik+++Aln	mRNA	1	NM_024461	coding	known	NC_000069.6	122924397	122926194	+	3|3 G1	67704	NO_INFO	NO_INFO	67704	NA	NO_INFO	1810037I17Rik	NA
74229	74229	Paqr8	0.06	0.08	0.02	0.05	0.03	0.06	0.07	0.09	0.03	0.07	0.04	0.08	5	7	2	5	3	6	0.0466667	0.0533333	0.0633333	0.0633333	4.66667	4.66667	-0.0229526	0.999812	0.980059	Paqr8	1700019B16Rik+++3110001D06Rik	mRNA	4	URS00009C26BB+++NM_001355122+++NM_028829+++XM_030243207	coding	known	NC_000067.6	20890548	20939650	+	1|1 A4	74229	NO_INFO	NO_INFO	74229	NA	K25040	Paqr8	NA
11776	11776	Ap3d1	11.22	14.89	14.4	14.9	12.26	11.15	12.22	18.05	19.01	19.45	15.17	13.98	796	1227	1227	1254	1002	935	12.77	13.5033	16.2	16.4267	1063.67	1083.33	-0.0186324	0.983922	0.909052	Ap3d1	AA407035+++Ap3d+++Bolvr+++mBLVR1+++mh+++mocha	mRNA	5	URS00009B6A26+++URS00009BAFD9+++XR_003948582+++NM_007460+++XM_030244850	coding	known	NC_000076.6	80706956	80742303	-	10 C1|10 39.72 cM	11776	NO_INFO	NO_INFO	11776	NA	K12396	NA	NA
75901	75901	Dcp1a	1.34	1.21	1.29	0.98	1.03	1.05	1.46	1.46	1.7	1.28	1.27	1.32	112	117	129	97	99	104	1.02	1.28	1.29	1.54	100	119.333	-0.266195	0.725746	0.236294	Dcp1a	1110066A22Rik+++4930568L04Rik+++AU019772+++D14Ertd817e+++Mitc1+++SMIF	mRNA	4	URS00009C5045+++NM_133761+++XM_006519655+++XM_006519656	coding	known	NC_000080.6	30479486	30527057	+	14 B|14 18.75 cM	75901	NO_INFO	NO_INFO	75901	NA	K12610	NA	NA
223739	223739	5031439G07Rik	4.05	5.83	7.21	7.5	7.68	6.88	4.41	7.07	9.52	9.79	9.51	8.63	414	691	884	909	904	831	7.35333	5.69667	9.31	7	881.333	663	0.435695	0.293794	0.0282224	5031439G07Rik	AW554572+++mKIAA0930	mRNA	4	URS00009AE7FC+++URS00009AF718+++NM_001033273+++NM_001368660	coding	known	NC_000081.6	84943936	84987971	-	15|15 E2	223739	NO_INFO	NO_INFO	223739	NA	NO_INFO	5031439G07Rik	NA
380660	380660	Acss3	2.65	1.49	3.62	2.2	2.18	2.8	2.89	1.8	4.78	2.87	2.7	3.51	173	116	302	179	174	224	2.39333	2.58667	3.02667	3.15667	192.333	197	-0.0414666	0.978826	0.893627	Acss3	8430416H19Rik+++Gm874	mRNA	7	URS00009B2E4B+++URS00009B816D+++URS00009BC5D0+++URS00009C1B65+++NM_001142804+++NM_198636+++XM_030245151	coding	known	NC_000076.6	106933514	107123761	-	10|10 D1	380660	NO_INFO	NO_INFO	380660	NA	K01908	NA	COG0365///NA
170748	170748	Smco4	5.92	5.97	4.45	4.08	3.7	5.02	6.45	7.23	5.88	5.32	4.58	6.29	69	81	62	57	49	68	4.26667	5.44667	5.39667	6.52	58	70.6667	-0.300594	0.781266	0.299483	Smco4	Fn5	mRNA	4	NM_001359604+++NM_133214+++XM_006510043+++XM_011242409	coding	known	NC_000075.6	15468440	15545260	+	9|9 A2	170748	NO_INFO	NO_INFO	170748	NA	NO_INFO	Smco4	NA
58238	58238	Fam181b	0	0	0.03	0.07	0.07	0.03	0	0	0.04	0.09	0.09	0.04	0	0	1	2	2	1	0.0566667	0.01	0.0733333	0.0133333	1.66667	0.333333	2.20438	0.770986	0.284453	Fam181b	A830059I20Rik+++AB041569	mRNA	6	URS00007630B4+++URS0000787361+++URS00009AEC50+++URS00009BB3DF+++URS0000AA70C7+++NM_021427	coding	known	NC_000073.6	93006982	93104790	+	7|7 E1	58238	NO_INFO	NO_INFO	58238	NA	NO_INFO	Fam181b	NA
233651	233651	Dchs1	0.36	0.27	0.39	0.27	0.37	0.29	0.4	0.33	0.51	0.35	0.46	0.36	59	51	76	52	69	55	0.31	0.34	0.39	0.413333	58.6667	62	-0.0899157	0.952797	0.768317	Dchs1	3110041P15Rik+++C130033F22Rik+++CDH25+++FIB1+++Gm165+++PCDH16	mRNA	4	URS00009B2294+++NM_001162943+++XM_006507655+++XM_030242498	coding	known	NC_000073.6	105752989	105863650	+	7|7 E3	233651	NO_INFO	NO_INFO	233651	NA	K16507	Dchs1	NA
108167415	108167415	Gm45978	8.52	10.24	7.91	9.89	9.34	7.87	9.28	12.41	10.44	12.91	11.56	9.87	223.33	311.1	248.49	306.51	280.9	242.77	9.03333	8.89	11.4467	10.71	276.727	260.973	0.0775679	0.952797	0.676392	Gm45978	NA	mRNA	1	XM_017312419	coding	known	NC_000073.6	29619477	29622580	+	7 B1|7	108167415	NO_INFO	NO_INFO	108167415	NA	NO_INFO	NA	NA
245886	245886	Ankrd27	4.9	5.32	5.21	6.48	6.4	5.29	5.34	6.45	6.87	8.46	7.93	6.63	292	360	381	457	441	378	6.05667	5.14333	7.67333	6.22	425.333	344.333	0.301159	0.435605	0.0632675	Ankrd27	AA408090+++BC016493+++D330003H11Rik+++Varp	mRNA	7	NR_152519+++NM_001358876+++NM_145633+++NM_178263+++XM_006539986+++XM_017322264+++XM_030242590	coding	known	NC_000073.6	35586226	35639237	+	7|7 B2	245886	NO_INFO	NO_INFO	245886	NA	NO_INFO	NA	NA
66065	66065	Hsd17b14	0.08	0	0	0	0	0	0.09	0	0	0	0	0	1	0	0	0	0	0	0	0.0266667	0	0.03	0	0.333333	-0.973727	0.952797	0.811392	Hsd17b14	0610039E24Rik+++Dhrs10+++retSDR3	mRNA	4	NM_025330+++XM_006541069+++XM_006541070+++XM_011250889	coding	known	NC_000073.6	45554920	45567321	+	7|7 B3	66065	NO_INFO	NO_INFO	66065	NA	NO_INFO	NA	NA
235344	235344	Sik2	1.27	1.69	2.09	1.94	1.49	1.54	1.38	2.05	2.76	2.53	1.85	1.94	137	220	264	229	183	201	1.65667	1.68333	2.10667	2.06333	204.333	207	-0.00338329	0.999812	0.987241	Sik2	G630080D20Rik+++Snf1lk2	mRNA	10	URS00009B05DA+++URS00009B7473+++URS00009BB75A+++URS00009BC30C+++URS00009C0F7E+++XR_379116+++NM_178710+++XM_006510266+++XM_006510267+++XM_017313332	coding	known	NC_000075.6	50885721	51009132	-	9|9 A5.3	235344	NO_INFO	NO_INFO	235344	NA	K16311	NA	NA
319909	319909	Ism1	0.02	0	0	0	0.06	0.04	0.03	0	0	0	0.08	0.05	1	0	0	0	3	2	0.0333333	0.00666667	0.0433333	0.01	1.66667	0.333333	2.22755	0.793711	0.314285	Ism1	5430433G21Rik+++Ism	mRNA	4	URS00009B24EC+++URS00009C53B3+++XR_374478+++NM_001276489	coding	known	NC_000068.7	139673241	139758581	+	2|2 F3	319909	NO_INFO	NO_INFO	319909	NA	NO_INFO	NA	NA
20739	20739	Spta1	0	0	0	0	0.01	0	0	0	0	0	0.02	0	0	0	0	0	2	0	0.00333333	0	0.00666667	0	0.666667	0	1.87844	0.952797	0.641538	Spta1	AF093576+++AI451697+++Spna-1+++Spna1+++ha+++ihj+++nmf4+++sph	mRNA	4	URS00009AE9DD+++XR_001783648+++XR_373600+++NM_011465	coding	known	NC_000067.6	174172739	174248449	+	1 H3|1 80.97 cM	20739	NO_INFO	NO_INFO	20739	NA	K06114	NA	NA
12558	12558	Cdh2	9.66	16.49	17.35	18.83	17.78	18.32	10.52	19.98	22.9	24.58	22.01	22.97	690	1367	1488	1598	1464	1546	18.31	14.5	23.1867	17.8	1536	1181.67	0.408894	0.353346	0.0396561	Cdh2	CDHN+++N-CAD+++Ncad	mRNA	14	URS0000761DD2+++URS00009AF759+++URS00009B04AA+++URS00009B0AD9+++URS00009B2110+++URS00009B393F+++URS00009B4ED5+++URS00009B8439+++URS00009B98D9+++URS00009BC7AF+++URS00009C027B+++URS00009C424A+++NM_007664+++XM_006525553	coding	known	NC_000084.6	16585388	16809246	+	18 A1|18 10.1 cM	12558	NO_INFO	NO_INFO	12558	NA	K06736	Cdh2	NA
68121	68121	Cep70	0.54	0.71	0.53	0.41	0.63	0.5	0.59	0.86	0.7	0.53	0.78	0.62	24	36	32	29	36	31	0.513333	0.593333	0.643333	0.716667	32	30.6667	0.0667937	0.966949	0.854393	Cep70	6720484E09Rik+++Bite+++C030018L16Rik	mRNA	26	URS00009B2847+++URS00009B28DA+++URS00009BC15F+++URS00009BCE7D+++URS00009C080D+++URS0000AF6F88+++XR_001779002+++XR_003947988+++XR_003947989+++XR_003947990+++XR_003947992+++XR_003947993+++NM_023873+++XM_006511391+++XM_006511393+++XM_017313546+++XM_030244533+++XM_030244534+++XM_030244535+++XM_030244536+++XM_030244537+++XM_030244538+++XM_030244539+++XM_030244540+++XM_030244541+++XM_030244542	coding	known	NC_000075.6	99183584	99325879	+	9|9 E3.3	68121	NO_INFO	NO_INFO	68121	NA	NO_INFO	NA	NA
30963	30963	Hacd1	6.48	6.03	7.41	11.05	9.23	8.7	7.05	7.31	9.78	14.42	11.43	10.91	65	70	89	130	105	101	9.66	6.64	12.2533	8.04667	112	74.6667	0.577404	0.232825	0.0185249	Hacd1	Ptpla	mRNA	4	URS00009BD06A+++URS00009BFDF4+++NM_001012396+++NM_013935	coding	known	NC_000068.7	13975563	14056035	-	2|2 A1- A2	30963	NO_INFO	NO_INFO	30963	NA	K10703	Hacd1	NA
12290	12290	Cacna1e	0.01	0.01	0	0	0.01	0.01	0.01	0.01	0	0	0.01	0.01	3	1	0	0	2	1	0.00666667	0.00666667	0.00666667	0.00666667	1	1.33333	-0.524172	0.952797	0.783564	Cacna1e	A430040I15+++BII+++Cach6+++Cacnl1a6+++Cav2.3+++Cchra1+++alpha1E	mRNA	29	URS00009ADFD3+++URS00009B8944+++URS00009BB274+++URS00009BCA30+++URS00009BD511+++URS00009BE8E4+++NM_009782+++XM_006529105+++XM_011247909+++XM_011247916+++XM_017312578+++XM_017312613+++XM_017312619+++XM_017312628+++XM_017312642+++XM_017312660+++XM_017312682+++XM_017312712+++XM_017312730+++XM_017312745+++XM_017312766+++XM_017312795+++XM_017312824+++XM_017312848+++XM_017312855+++XM_017312867+++XM_030…	coding	known	NC_000067.6	154390806	154884785	+	1 G3|1 66.14 cM	12290	NO_INFO	NO_INFO	12290	NA	K04852	Cacna1e	NA
76886	76886	Fam81a	0.13	0.27	0.41	0.12	0.36	0.41	0.14	0.33	0.54	0.16	0.45	0.52	5	14	20	6	17	20	0.296667	0.27	0.376667	0.336667	14.3333	13	0.193377	0.952797	0.763128	Fam81a	6430514L14Rik	mRNA	4	NM_029784+++XM_006511550+++XM_006511551+++XM_030244712	coding	known	NC_000075.6	70089304	70142558	-	9|9 D	76886	NO_INFO	NO_INFO	76886	NA	NO_INFO	Fam81a	NA
109267	109267	Ssc4d	0.68	0.96	0.48	0.35	0.47	0.38	0.74	1.17	0.63	0.46	0.59	0.48	26	43	22	16	21	18	0.4	0.706667	0.51	0.846667	18.3333	30.3333	-0.726723	0.533489	0.100048	Ssc4d	C330016E03Rik+++S4D-SRCRB+++SRCRB-S4D+++Srcrb4d	mRNA	4	NM_001160366+++XM_006504335+++XM_006504336+++XM_006504337	coding	known	NC_000071.6	135960220	135974535	-	5|5 G2	109267	NO_INFO	NO_INFO	109267	NA	NO_INFO	NA	NA
100216474	100216474	Ttll2	0	0	0.04	0.08	0	0	0	0	0.05	0.1	0	0	0	0	1	2	0	0	0.0266667	0.0133333	0.0333333	0.0166667	0.666667	0.333333	0.845147	0.952797	0.790895	Ttll2	EG625850	mRNA	7	URS00009C4B38+++XR_876321+++NM_001098267+++XM_011246171+++XM_011246172+++XM_011246174+++XM_011246175	coding	known	NC_000083.6	7347511	7364035	-	17|17 A1	100216474	NO_INFO	NO_INFO	100216474	NA	NO_INFO	NA	NA
242557	242557	Atg4c	2.58	3.14	3.12	3.79	3.32	3.01	2.81	3.81	4.12	4.95	4.11	3.77	107	150	158	188	157	144	3.37333	2.94667	4.27667	3.58	163	138.333	0.239	0.73861	0.246325	Atg4c	Apg4-C+++Apg4c+++Atg4cl+++Autl1	mRNA	23	URS00009AEC7F+++URS00009B0A23+++URS00009B0A39+++URS00009B5B2F+++URS00009B74FF+++URS00009B8B65+++URS00009BA2FB+++URS00009BB6C6+++URS00009BEA63+++XR_003954943+++XR_376316+++XR_867860+++XR_867862+++XR_867864+++XR_867865+++NM_001145967+++NM_175029+++XM_006503071+++XM_006503072+++XM_006503073+++XM_030253555+++XM_030253556+++XM_030253557	coding	known	NC_000070.6	99189159	99297258	+	4|4 C6	242557	NO_INFO	NO_INFO	242557	NA	K08342	Atg4c	NA
215814	215814	Ccdc28a	7.41	6.39	7.44	7.96	9.67	8.74	8.07	7.75	9.83	10.38	11.97	10.95	123	128	147	151	174	166	8.79	7.08	11.1	8.55	163.667	132.667	0.294163	0.643394	0.163332	Ccdc28a	1700009P13Rik+++AI480677	mRNA	8	URS00009AD597+++URS00009B52AE+++URS00009C3BFD+++URS0000AA55FD+++XR_003948656+++NM_001346751+++NM_144820+++XM_030245002	coding	known	NC_000076.6	18213676	18246019	+	10|10 A3	215814	NO_INFO	NO_INFO	215814	NA	NO_INFO	Ccdc28a	NA
98053	98053	Gtf2f1	19.68	19.02	12.54	14.64	9.87	11.57	21.43	23.04	16.55	19.1	12.21	14.51	453	508	347	402	262	315	12.0267	17.08	15.2733	20.34	326.333	436	-0.449898	0.408552	0.0545243	Gtf2f1	2810405L04Rik+++C76800+++RAP74	mRNA	2	NM_133801+++XM_006525194	coding	known	NC_000083.6	57003401	57011394	-	17|17 D	98053	NO_INFO	NO_INFO	98053	NA	K03138	NA	COG1675///NA
621893	621893	H2ac21	0	0	0	0.25	0	0	0	0	0	0.33	0	0	0	0	0	1	0	0	0.0833333	0	0.11	0	0.333333	0	0.949827	0.952797	0.815937	H2ac21	EG621893+++H2a-613a+++Hist2h2ab	mRNA	2	URS000076D5CD+++NM_178213	coding	known	NC_000069.6	96209627	96220354	+	3|3 F2.1	621893	NO_INFO	NO_INFO	621893	NA	K11251	H2ac21	NA
99712	99712	Cept1	18.1	17.98	20.73	22.51	20.85	18.36	19.71	21.79	27.37	29.37	25.81	23.03	652	665	697	748	711	667	20.5733	18.9367	26.07	22.9567	708.667	671.333	0.0594077	0.952797	0.711165	Cept1	9930118K05Rik+++mCEPT1	mRNA	15	URS00009AF8B8+++URS00009B031D+++URS00009B2A90+++URS00009B7EA5+++URS00009C377F+++XR_001783786+++XR_001783787+++XR_003954431+++XR_375610+++NM_001293694+++NM_001357818+++NM_001357819+++NM_133869+++XM_006502471+++XM_011240336	coding	known	NC_000069.6	106502260	106547802	-	3|3 F2.3	99712	NO_INFO	NO_INFO	99712	NA	K13644	Cept1	NA
76784	76784	Mtif2	7.02	6.94	5.39	5.91	4.94	6.58	7.64	8.41	7.11	7.71	6.11	8.25	271	314	263	277	227	311	5.81	6.45	7.35667	7.72	271.667	282.667	-0.0740307	0.952797	0.711937	Mtif2	2310038D14Rik+++2410112O06Rik+++IF-2(Mt)+++IF-2mt+++IF2(mt)	mRNA	11	URS00009AEBD7+++XR_003949529+++XR_380987+++NM_001282118+++NM_001282119+++NM_001282120+++NM_133767+++XM_006514891+++XM_006514892+++XM_030246423+++XM_030246424	coding	known	NC_000077.6	29525352	29545452	+	11|11 A3.3	76784	NO_INFO	NO_INFO	76784	NA	NO_INFO	NA	COG0532///NA
100503386	100503386	Tpbgl	4.33	6.31	6.27	4.87	4.33	5.18	4.72	7.64	8.27	6.35	5.36	6.5	188	317	326	250	216	265	4.79333	5.63667	6.07	6.87667	243.667	277	-0.169433	0.848144	0.383689	Tpbgl	EG245190+++Gm4980	mRNA	4	URS0000764F14+++URS0000772C9F+++URS00009B3C86+++NM_001195529	coding	known	NC_000073.6	99621796	99631711	+	7|7 E1	100503386	NO_INFO	NO_INFO	100503386	NA	NO_INFO	Tpbgl	NA
54607	54607	Socs6	1.36	1.49	1.34	1.17	1.4	1.14	1.48	1.8	1.77	1.52	1.74	1.42	122	155	146	125	148	121	1.23667	1.39667	1.56	1.68333	131.333	141	-0.105034	0.952797	0.621271	Socs6	1500012M23Rik+++5830401B18Rik+++AI447482+++Cis4+++Cish4+++HSPC060+++SOCS-4+++SOCS-6+++SSI4+++STAI4+++STATI4+++Socs4	mRNA	7	URS00009BA4F2+++URS00009BF2DC+++NM_018821+++XM_006526513+++XM_011247089+++XM_011247090+++XM_030250541	coding	known	NC_000084.6	88865169	88894364	-	18|18 E4	54607	NO_INFO	NO_INFO	54607	NA	K04699	NA	NA
217119	217119	Xylt2	4.21	6.13	4.88	6.2	5.76	5.34	4.59	7.43	6.44	8.1	7.12	6.69	208	351	289	363	327	311	5.76667	5.07333	7.30333	6.15333	333.667	282.667	0.247892	0.648826	0.167473	Xylt2	E030002B02Rik+++XT-II+++XT2+++xylT-II	mRNA	6	XR_003949393+++XR_003949394+++XR_003949395+++XR_388412+++XR_879601+++NM_145828	coding	known	NC_000077.6	94663845	94677518	-	11|11 D	217119	NO_INFO	NO_INFO	217119	NA	K00771	Xylt2	NA
272589	272589	Tbcel	5.61	5.68	6.25	5.51	4.98	5.07	6.11	6.88	8.25	7.19	6.16	6.36	401	472	547	476	413	434	5.18667	5.84667	6.57	7.08	441	473.333	-0.10662	0.90342	0.492393	Tbcel	D330014K23+++E130107N23Rik+++Lrrc35	mRNA	8	URS00009AE214+++URS00009B8745+++URS00009BD4FA+++NM_001357656+++NM_001357657+++NM_173038+++XM_006510395+++XM_006510396	coding	known	NC_000075.6	42412316	42472273	-	9|9 A5.1	272589	NO_INFO	NO_INFO	272589	NA	NO_INFO	Tbcel	NA
216724	216724	Rufy1	8.19	9.23	7.89	7.63	7.21	7.08	8.92	11.18	10.42	9.96	8.92	8.88	297	403	359	342	315	308	7.30667	8.43667	9.25333	10.1733	321.667	353	-0.136999	0.85129	0.391145	Rufy1	3000002E04Rik+++Rabip4+++ZFYVE12	mRNA	4	XR_001779949+++NM_172557+++XM_006532841+++XM_017314442	coding	known	NC_000077.6	50389286	50431274	-	11|11 B1.3	216724	NO_INFO	NO_INFO	216724	NA	K12482	Rufy1	NA
76900	76900	Ssbp4	5.37	7.54	5.5	5.85	4.27	4.64	5.85	9.14	7.26	7.63	5.29	5.82	116	186	139	144	105	114	4.92	6.13667	6.24667	7.41667	121	147	-0.280629	0.707183	0.219282	Ssbp4	1210002E11Rik+++AW743380+++Sspb4	mRNA	13	NM_133772+++XM_006509784+++XM_006509790+++XM_006509792+++XM_006509794+++XM_006509795+++XM_011242336+++XM_011242337+++XM_011242338+++XM_030243845+++XM_030243846+++XM_030243848+++XM_030243849	coding	known	NC_000074.6	70597485	70608434	-	8|8 B3.3	76900	NO_INFO	NO_INFO	76900	NA	NO_INFO	Ssbp4	NA
66926	66926	Trmt6	1.27	1.97	2.43	1.86	2.04	2.42	1.38	2.39	3.21	2.43	2.53	3.03	51	92	118	90	95	115	2.10667	1.89	2.66333	2.32667	100	87	0.226981	0.864682	0.416719	Trmt6	3300001M20Rik+++AU016412+++AW492787+++CGI-09+++mKIAA1153	mRNA	5	NM_001356442+++NM_001356443+++NM_001356444+++NM_175113+++XM_030251972	coding	known	NC_000068.7	132804207	132816054	-	2|2 F2	66926	NO_INFO	NO_INFO	66926	NA	NO_INFO	NA	NA
545123	545123	Cyp2d11	0.45	0.21	0.16	0.38	0.91	0.18	0.49	0.25	0.21	0.5	1.13	0.22	9.48	5.03	4.05	9.42	21.77	4.35	0.49	0.273333	0.616667	0.316667	11.8467	6.18667	0.868583	0.767117	0.27719	Cyp2d11	Cyp2d+++P450-2D	mRNA	1	NM_001104531	coding	known	NC_000081.6	82389154	82394022	-	15 E1|15 38.58 cM	545123	NO_INFO	NO_INFO	545123	NA	K07414	NA	NA
66691	66691	Gapvd1	3.55	3.42	4.56	4.19	3.71	3.95	3.86	4.15	6.02	5.46	4.59	4.96	354	396	544	494	429	472	3.95	3.84333	5.00333	4.67667	465	431.333	0.106945	0.929549	0.546488	Gapvd1	2010005B09Rik+++4432404J10Rik+++AW108497+++Gapex-5+++RAP6+++RME-6+++mKIAA1521	mRNA	21	NR_151469+++URS00009B15B7+++URS00009B4A13+++URS00009B4C3C+++URS00009B8502+++URS00009BF654+++URS00009C1E4E+++XR_003953692+++XR_003953693+++XR_003953694+++NM_001356441+++NM_025709+++XM_011239150+++XM_017319195+++XM_017319196+++XM_017319197+++XM_030251954+++XM_030251955+++XM_030251956+++XM_030251957+++XM_030251958	coding	known	NC_000068.7	34674597	34755285	-	2|2 B	66691	NO_INFO	NO_INFO	66691	NA	NO_INFO	NA	NA
77352	77352	Axdnd1	0.02	0	0.02	0	0.02	0	0.02	0	0.02	0	0.02	0	1	0	1	0	1	0	0.00666667	0.0133333	0.00666667	0.0133333	0.333333	0.666667	-0.960144	0.952797	0.729184	Axdnd1	9430070O13Rik+++Gm979	mRNA	8	URS00009B4C36+++URS00009B785C+++URS00009B8350+++URS00009BD349+++URS00009BDA6E+++NM_001346967+++XM_030243577+++XM_030243584	coding	known	NC_000067.6	156330415	156421176	+	1|1 G3	77352	NO_INFO	NO_INFO	77352	NA	NO_INFO	NA	NA
242607	242607	Slc1a7	0.03	0.05	0	0.05	0.05	0.02	0.03	0.06	0	0.06	0.06	0.03	1	2	0	2	2	1	0.04	0.0266667	0.05	0.03	1.66667	1	0.723955	0.952797	0.667657	Slc1a7	A930031E15Rik+++Eaat5	mRNA	5	XR_003954945+++NM_146255+++XM_006503088+++XM_006503090+++XM_030253567	coding	known	NC_000070.6	107968406	108013529	+	4|4 C7	242607	NO_INFO	NO_INFO	242607	NA	K05618	NA	NA
16973	16973	Lrp5	10.62	13.99	13.96	12.11	11.67	10.66	11.56	16.95	18.43	15.8	14.44	13.37	813	1242	1283	1099	1029	964	11.48	12.8567	14.5367	15.6467	1030.67	1112.67	-0.0996597	0.908549	0.50011	Lrp5	BMND1+++HBM+++LR3+++LRP7+++OPPG+++mKIAA4142	mRNA	5	URS00009BFD5C+++URS00009C1CC5+++URS00009C4C63+++XR_388250+++NM_008513	coding	known	NC_000085.6	3584825	3686585	+	19|19 A	16973	NO_INFO	NO_INFO	16973	NA	K03068	Lrp5	NA
24001	24001	Tiam2	0.89	1.46	1.17	1.81	1.76	1.87	0.97	1.77	1.54	2.37	2.18	2.35	32	67	55	86	80	87	1.81333	1.17333	2.3	1.42667	84.3333	51.3333	0.733338	0.152712	0.00932845	Tiam2	3000002F19Rik+++STEF+++mKIAA2016	mRNA	20	URS00009AEFD3+++URS00009B253B+++URS00009B9998+++URS00009BBE19+++URS00009BC53D+++URS00009BDF15+++URS00009C4CAD+++NM_001122998+++NM_001286757+++NM_001286758+++NM_011878+++XM_006523225+++XM_006523226+++XM_006523227+++XM_006523229+++XM_006523230+++XM_006523231+++XM_006523233+++XM_017317463+++XM_030249767	coding	known	NC_000083.6	3326313	3519397	+	17 A1|17 1.99 cM	24001	NO_INFO	NO_INFO	24001	NA	NO_INFO	Tiam2	NA
66931	66931	1700010I14Rik	0.04	0.1	0.04	0.21	0.18	0.14	0.05	0.12	0.05	0.28	0.23	0.18	1	3	1	6	5	4	0.176667	0.06	0.23	0.0733333	5	1.66667	1.59519	0.630771	0.154544	1700010I14Rik	NA	mRNA	4	XR_003952172+++XR_876377+++NM_001347544+++NM_025851	coding	known	NC_000083.6	8988320	9008319	+	17|17 A1	66931	NO_INFO	NO_INFO	66931	NA	NO_INFO	NA	NA
11981	11981	Atp9a	12.89	15.83	17.28	22.31	18.06	15.15	14.04	19.18	22.81	29.11	22.35	18.99	514	812	1041	1279	1012	868	18.5067	15.3333	23.4833	18.6767	1053	789	0.434164	0.340448	0.037386	Atp9a	IIa	mRNA	10	URS00009BAA6E+++NM_001289445+++NM_001289446+++NM_001354977+++NM_001354978+++NM_015731+++XM_006498603+++XM_017315066+++XM_017315067+++XM_030246882	coding	known	NC_000068.7	168634438	168742370	-	2|2 H3	11981	NO_INFO	NO_INFO	11981	NA	NO_INFO	Atp9a	NA
72310	72310	Nkg7	2.05	3.55	1.81	0.58	1.41	0.49	2.23	4.3	2.39	0.76	1.74	0.61	18	36	19	6	14	5	0.826667	2.47	1.03667	2.97333	8.33333	24.3333	-1.52993	0.145291	0.00862286	Nkg7	2500004F03Rik	mRNA	1	NM_024253	coding	known	NC_000073.6	43437138	43438246	+	7|7 B3	72310	NO_INFO	NO_INFO	72310	NA	NO_INFO	Nkg7	NA
319604	319604	Fam168a	2.69	4.17	3.93	3.78	3.13	3.39	2.93	5.06	5.19	4.94	3.87	4.26	265	480	468	445	354	396	3.43333	3.59667	4.35667	4.39333	398.333	404.333	-0.0039764	0.999812	0.983179	Fam168a	2610030B18Rik+++B930006L02Rik+++mKIAA0280	mRNA	11	URS00009AE632+++URS00009B4778+++URS00009B834F+++URS00009BD26F+++URS00009C0E86+++NM_001362169+++NM_001362170+++NM_178764+++XM_006507920+++XM_011241829+++XM_030242670	coding	known	NC_000073.6	100706628	100841646	+	7|7 E2	319604	NO_INFO	NO_INFO	319604	NA	NO_INFO	NA	NA
14960	14960	H2-Aa	63.87	170.93	75.93	29.61	36.08	30.15	69.56	207.14	100.24	38.64	44.65	37.8	874	2705	1243	477	563	483	31.9467	103.577	40.3633	125.647	507.667	1607.33	-1.62146	6.00203e-06	2.82886e-08	H2-Aa	Aalpha+++H-2Aa+++H2Aa+++I-Aalpha+++IAalpha+++Ia-1+++Ia1	mRNA	6	URS00009BD9C9+++URS00009BF988+++NM_010378+++rna-NM_010378.3-2+++rna-NM_010378.3-3+++rna-NM_010378.3-4	coding	known	NT_187004.1	531653	34287823	-	17 B1|17 17.98 cM	14960	NO_INFO	NO_INFO	14960	NA	K06752	H2-Aa	NA
74522	74522	Morc2a	3.98	3.49	3.58	3.02	2.73	2.66	4.33	4.23	4.73	3.94	3.38	3.34	278	298	321	264	230	232	2.80333	3.68333	3.55333	4.43	242	299	-0.318741	0.455892	0.0695469	Morc2a	8430403M08Rik+++Zcwcc1	mRNA	6	URS00009BA908+++NM_001159288+++NM_001363202+++NM_198162+++XM_006514871+++XM_011243775	coding	known	NC_000077.6	3649189	3690477	+	11|11 A1	74522	NO_INFO	NO_INFO	74522	NA	NO_INFO	NA	NA
73689	73689	Bloc1s2	15.51	13.78	10.78	11.59	12.16	12.88	16.89	16.69	14.23	15.12	15.05	16.15	164	165	142	140	146.99	163	12.21	13.3567	15.44	15.9367	149.997	157	-0.0917841	0.952797	0.686605	Bloc1s2	2410089B13Rik+++BLOS2+++Bloc1s2a	mRNA	3	URS00009B5584+++NM_028607+++XM_011247369	coding	known	NC_000085.6	44139246	44146470	-	19|19 C3	73689	NO_INFO	NO_INFO	73689	NA	NO_INFO	NA	NA
67610	67610	Rspry1	2.24	2.99	3.73	3.18	2.77	3.39	2.44	3.62	4.92	4.15	3.42	4.25	114	186	243	209	178	215	3.11333	2.98667	3.94	3.66	200.667	181	0.169069	0.884765	0.460197	Rspry1	4930470D19Rik+++AI608258	mRNA	6	URS00009B0289+++URS00009BA672+++URS00009C2329+++URS00009C58FC+++NM_001359093+++NM_026274	coding	known	NC_000074.6	94601941	94660276	+	8|8 C5	67610	NO_INFO	NO_INFO	67610	NA	NO_INFO	NA	NA
14004	14004	Chchd2	744.59	604.58	547.7	585.97	595.86	510.41	810.91	732.64	723.08	764.68	737.53	640.04	7664.75	7188.94	6735.67	7080.25	6967.27	6129.81	564.08	632.29	714.083	755.543	6725.78	7196.45	-0.129509	0.894754	0.47405	Chchd2	AL033347+++Etohi6	mRNA	1	NM_024166	coding	known	NC_000071.6	129881161	129887470	-	5|5 G1.3	14004	NO_INFO	NO_INFO	14004	NA	NO_INFO	NA	NA
13175	13175	Dclk1	0	0.06	0	0	0	0	0	0.07	0	0	0	0	0	7	0	0	0	0	0	0.02	0	0.0233333	0	2.33333	-3.55962	0.682035	0.194871	Dclk1	1700113D08Rik+++2810480F11Rik+++AI836758+++Click-I+++Cpg16+++Dcamkl1+++Dcl+++Dclk+++mKIAA0369	mRNA	35	URS00009AD9D5+++URS00009AF78D+++URS00009AF8A5+++URS00009B01F1+++URS00009B21B8+++URS00009B2344+++URS00009B344C+++URS00009B4308+++URS00009B8D9B+++URS00009BC4DB+++URS00009BE516+++URS00009C1E68+++URS00009C2FE8+++URS00009C44F8+++XR_003954278+++XR_003954279+++NM_001111051+++NM_001111052+++NM_001111053+++NM_001195538+++NM_001195539+++NM_001195540+++NM_001357466+++NM_001357468+++NM_001357469+++NM_0013574…	coding	known	NC_000069.6	55242303	55539068	+	3|3 C	13175	NO_INFO	NO_INFO	13175	NA	NO_INFO	Dclk1	NA
108689	108689	Stn1	1.98	1.48	1.68	1.35	1.17	1.24	2.15	1.79	2.22	1.76	1.45	1.55	48	43	52	39	32	39	1.25333	1.71333	1.58667	2.05333	36.6667	47.6667	-0.397536	0.715004	0.226983	Stn1	0610009H20Rik+++2310057J23Rik+++AAF-44+++AAF44+++AI413458+++Obfc1+++RPA-32	mRNA	4	URS00009BC890+++NM_175360+++XM_006526598+++XM_030250695	coding	known	NC_000085.6	47501031	47545845	-	19|19 C3	108689	NO_INFO	NO_INFO	108689	NA	NO_INFO	NA	NA
89867	89867	Sec16b	23.36	23.27	27.67	20.67	19.43	21.1	25.44	28.2	36.53	26.98	24.05	26.46	1491	1718	2120	1561	1429	1594	20.4	24.7667	25.83	30.0567	1528	1776.33	-0.22007	0.59109	0.131102	Sec16b	Lztr2+++Rgpr+++Rgpr-p117	mRNA	8	NR_027641+++NM_001159986+++NM_033354+++XM_006497049+++XM_017312983+++XM_017312984+++XM_017312986+++XM_017312987	coding	known	NC_000067.6	157506733	157568425	+	1|1 H1	89867	NO_INFO	NO_INFO	89867	NA	NO_INFO	NA	NA
67868	67868	Cela3b	0.1	0	2.07	0	0	0	0.11	0	2.74	0	0	0	1	0	25	0	0	0	0	0.723333	0	0.95	0	8.66667	-5.46486	0.64328	0.163058	Cela3b	0910001F22Rik+++2310074F01Rik+++AI504000+++Ela3+++Ela3b	mRNA	1	NM_026419	coding	known	NC_000070.6	137421008	137430520	-	4 D3|4 69.9 cM	67868	NO_INFO	NO_INFO	67868	NA	K01345	NA	NA
15223	15223	Foxj1	0.31	0.6	0.14	0.07	0.19	0.19	0.33	0.72	0.18	0.09	0.24	0.23	12	25	6	3	8	8	0.15	0.35	0.186667	0.41	6.33333	14.3333	-1.1703	0.551071	0.109619	Foxj1	FKHL-13+++HFH-4+++Hfh4	mRNA	2	NM_008240+++XM_006532269	coding	known	NC_000077.6	116330704	116335499	-	11 E2|11 81.16 cM	15223	NO_INFO	NO_INFO	15223	NA	NO_INFO	Foxj1	NA
223337	223337	Ugt3a2	63.19	75.71	87.79	83.02	94.51	87.59	68.81	91.74	115.9	108.34	116.97	109.83	1917	2660	3192	2978	3291	3129	88.3733	75.5633	111.713	92.15	3132.67	2589.67	0.287202	0.440109	0.0643582	Ugt3a2	AI313915	mRNA	3	NM_144845+++XM_006520049+++XM_011245349	coding	known	NC_000081.6	9335551	9370955	+	15|15 A1	223337	NO_INFO	NO_INFO	223337	NA	NO_INFO	Ugt3a2	NA
211556	211556	Ap1ar	5.88	7.66	8.26	7.58	6.01	6.41	6.41	9.29	10.9	9.89	7.44	8.04	213	335	374	339	261	285	6.66667	7.26667	8.45667	8.86667	295	307.333	-0.0473226	0.952797	0.803998	Ap1ar	AA407621+++C78909+++Gadkin	mRNA	12	URS00009AF98C+++NM_001346718+++NM_145964+++XM_006501240+++XM_006501241+++XM_006501242+++XM_006501243+++XM_006501244+++XM_006501245+++XM_030252524+++XM_030252525+++XM_030252526	coding	known	NC_000069.6	127807007	127837523	-	3|3 G2	211556	NO_INFO	NO_INFO	211556	NA	NO_INFO	NA	NA
72475	72475	Ssbp3	13.06	17.35	13.48	16.41	16.31	14.53	14.23	21.03	17.8	21.41	20.19	18.22	538	895	711	858	835	763	15.75	14.63	19.94	17.6867	818.667	714.667	0.20466	0.696561	0.207185	Ssbp3	2610021L12Rik+++2610200M23Rik+++5730488C10Rik+++AI854733+++AW551939+++LAST+++SSDP1	mRNA	12	URS00009BA3A2+++NM_001355532+++NM_023672+++NM_198438+++XM_006503411+++XM_006503412+++XM_006503413+++XM_006503414+++XM_006503415+++XM_006503416+++XM_006503417+++XM_006503420	coding	known	NC_000070.6	106911470	107049694	+	4|4 C7	72475	NO_INFO	NO_INFO	72475	NA	NO_INFO	Ssbp3	NA
11542	11542	Adora3	0.03	0	0.08	0	0.03	0	0.03	0	0.1	0	0.03	0	1	0	3	0	1	0	0.01	0.0366667	0.01	0.0433333	0.333333	1.33333	-1.89078	0.867713	0.428797	Adora3	A3AR+++A3R+++AA3R+++ARA3+++Gpcr2	mRNA	1	NM_009631	coding	known	NC_000069.6	105904421	105908928	+	3 F2.2|3 46.45 cM	11542	NO_INFO	NO_INFO	11542	NA	K04268	NA	NA
330671	330671	B4galnt4	0.06	0.02	0.08	0	0	0	0.06	0.02	0.1	0	0	0	3	1	5	0	0	0	0	0.0533333	0	0.06	0	3	-4.04808	0.332902	0.035716	B4galnt4	Gm1095+++NGalNAc-T1+++beta4GalNAcT4	mRNA	1	NM_177897	coding	known	NC_000073.6	141060978	141072400	+	7|7 F5	330671	NO_INFO	NO_INFO	330671	NA	K09657	NA	NA
69757	69757	Leng1	7.2	6.75	7.18	6.06	6.96	6.34	7.84	8.18	9.48	7.91	8.61	7.94	220	239	263	219	244	228	6.45333	7.04333	8.15333	8.5	230.333	240.667	-0.0718786	0.952797	0.695199	Leng1	1500001K17Rik	mRNA	1	NM_027203	coding	known	NC_000073.6	3660107	3665840	-	7|7 A1	69757	NO_INFO	NO_INFO	69757	NA	NO_INFO	NA	NA
110749	110749	Chaf1b	1.05	0.9	1.34	1.05	0.81	1.15	1.14	1.09	1.76	1.37	1	1.44	26	27	41	33	24	35	1.00333	1.09667	1.27	1.33	30.6667	31.3333	-0.0344824	0.991132	0.927978	Chaf1b	2600017H24Rik+++C76145+++CAF-I p60+++CAF-Ip60+++CAF1+++CAF1A+++CAF1P60+++MPHOSPH7	mRNA	5	URS00009B6C90+++URS0000D71BD4+++NM_028083+++XM_006522847+++XM_006522848	coding	known	NC_000082.6	93883900	93906115	+	16 C4|16 54.96 cM	110749	NO_INFO	NO_INFO	110749	NA	NO_INFO	NA	NA
497652	497652	Acd	10.68	14.01	12.05	10.46	13.35	12.34	11.63	16.98	15.91	13.65	16.52	15.47	189	294	274	238	286	278	12.05	12.2467	15.2133	14.84	267.333	252.333	0.0943005	0.952797	0.615257	Acd	NA	mRNA	10	NR_145824+++NR_145825+++NM_001012638+++NM_001348349+++XM_006531169+++XM_006531170+++XM_006531174+++XM_006531175+++XM_011248435+++XM_030243661	coding	known	NC_000074.6	105698155	105701228	-	8 D3|8 53.04 cM	497652	NO_INFO	NO_INFO	497652	NA	NO_INFO	NA	NA
192136	192136	Sugct	16.36	13.67	14.79	11.19	10.13	12.15	17.82	16.57	19.53	14.6	12.54	15.24	375	363	407	304	267	328	11.1567	14.94	14.1267	17.9733	299.667	381.667	-0.36862	0.387308	0.0481087	Sugct	5033411D12Rik+++D17907	mRNA	8	URS00009B4060+++URS00009B611E+++URS00009B9039+++URS00009BCADC+++URS00009C0E54+++URS0000BCEBE3+++NM_138654+++XM_011244290	coding	known	NC_000079.6	16857472	17694795	+	13|13 A2	192136	NO_INFO	NO_INFO	192136	NA	NO_INFO	Sugct	NA
12326	12326	Camk4	0.01	0.02	0.01	0	0	0.01	0.01	0.02	0.01	0	0	0.01	2	4	2	0	0	2	0.00333333	0.0133333	0.00333333	0.0133333	0.666667	2.66667	-1.98692	0.73925	0.247494	Camk4	A430110E23Rik+++AI666733+++CaMKIV+++CaMKIV/Gr+++D18Bwg0362e	mRNA	17	URS00009AD276+++URS00009AE562+++URS00009B2363+++URS00009B59F2+++URS00009B6420+++URS00009B9A1D+++URS00009BE16A+++URS00009BED1A+++URS00009C27B9+++URS00009C3204+++URS00009C5D5E+++NM_009793+++XM_006525543+++XM_006525544+++XM_006525546+++XM_030250297+++XM_030250298	coding	known	NC_000084.6	32934941	33195767	+	18 B1|18 18.15 cM	12326	NO_INFO	NO_INFO	12326	NA	K05869	Camk4	NA
71382	71382	Pex1	4.83	4.87	6.14	6.32	6.89	6.26	5.26	5.9	8.1	8.25	8.53	7.84	289	357	468	467	494	460	6.49	5.28	8.20667	6.42	473.667	371.333	0.356992	0.363523	0.0424504	Pex1	5430414H02Rik+++E330005K07Rik+++ZWS1	mRNA	9	URS00008118F4+++URS00008119FF+++URS00009C4D27+++XR_001784746+++NM_001293806+++NM_027777+++XM_006503607+++XM_017321100+++XM_017321101	coding	known	NC_000071.6	3596066	3637230	+	5|5 A1	71382	NO_INFO	NO_INFO	71382	NA	K13338	NA	COG0464///NA
54338	54338	Slc23a2	1.39	1.52	2.26	3.02	2.99	1.87	1.52	1.84	2.98	3.94	3.7	2.34	134	166	253	336	325	210	2.62667	1.72333	3.32667	2.11333	290.333	184.333	0.66451	0.139857	0.00814424	Slc23a2	AI844736+++NBTL1+++SVCT2+++Slc23a1+++YSPL2+++YSPL3+++mKIAA0238	mRNA	10	URS00009B992E+++URS00009C436E+++NM_001355430+++NM_001355431+++NM_018824+++XM_006499906+++XM_006499907+++XM_011239698+++XM_030251882+++XM_030251883	coding	known	NC_000068.7	132052496	132145320	-	2|2 F2	54338	NO_INFO	NO_INFO	54338	NA	NO_INFO	Slc23a2	NA
105245406	105245406	Gm5954	0.1	0.03	0	0.03	0	0.03	0.11	0.04	0	0.04	0	0.04	2.5	1	0	1	0	1	0.02	0.0433333	0.0266667	0.05	0.666667	1.16667	-0.698	0.952797	0.74672	Gm5954	EG546534	mRNA	3	URS00009C427D+++XM_017315315+++XM_030247062	coding	known	NC_000078.6	24012268	24043111	-	12|12 A1.3	105245406	NO_INFO	NO_INFO	105245406	NA	NO_INFO	NA	NA
17842	17842	Mup3	11396.2	8032.7	4855.71	5552.34	8113.24	8211.34	12411.3	9734.1	6410.48	7245.72	10042.3	10296.9	117843	95949.4	59987.6	67396.3	95303.2	99068.9	7292.31	8094.87	9194.97	9518.62	87256.1	91259.9	-0.119721	0.952797	0.680521	Mup3	MUP15+++MUPIII+++Mup-3+++Mup25	mRNA	4	NR_149826+++rna-NR_149826.1-2+++NM_001039544+++rna-NM_001039544.2-2	coding	known	NT_166294.1	149450	62087317	+	4|4 B3	17842	NO_INFO	NO_INFO	17842	NA	NO_INFO	Mup3	NA
67440	67440	Mtpap	2.92	3.33	3.7	3.85	3.25	3.6	3.18	4.03	4.88	5.02	4.02	4.52	177	232	269	278	225	258	3.56667	3.31667	4.52	4.03	253.667	226	0.168483	0.829972	0.355418	Mtpap	0610027A18Rik+++AW551379+++Papd1+++Tent6	mRNA	11	URS00009AF38A+++URS00009B96D7+++URS00009BFC0A+++URS00009C4084+++URS0000A9B6C3+++URS0000E01D01+++URS0000EF4585+++NM_001361008+++NM_001361009+++NM_026157+++XM_006526184	coding	known	NC_000084.6	4353644	4400910	+	18|18 A1	67440	NO_INFO	NO_INFO	67440	NA	NO_INFO	NA	NA
75388	75388	Boll	0	0	0	0	0.04	0	0	0	0	0	0.05	0	0	0	0	0	1	0	0.0133333	0	0.0166667	0	0.333333	0	0.949827	0.952797	0.815937	Boll	4930554P13Rik+++4930597B14Rik	mRNA	9	URS00009B36BC+++URS00009BC73D+++URS00009BD46C+++XR_373267+++NM_001113367+++NM_001367887+++NM_001368767+++NM_001368768+++NM_029267	coding	known	NC_000067.6	55242202	55363789	+	1|1 C1.2	75388	NO_INFO	NO_INFO	75388	NA	NO_INFO	NA	NA
54422	54422	Barhl1	0.25	0.15	0.05	0.12	0.1	0.1	0.28	0.18	0.06	0.16	0.12	0.12	9	6	2	5	4	4	0.106667	0.15	0.133333	0.173333	4.33333	5.66667	-0.457108	0.952797	0.615831	Barhl1	Dres115+++MBH2	mRNA	9	NM_001164186+++NM_001355434+++NM_001355435+++NM_019446+++XM_006498182+++XM_011239138+++XM_030251884+++XM_030251885+++XM_030251886	coding	known	NC_000068.7	28907680	28917984	-	2 A3|2 19.38 cM	54422	NO_INFO	NO_INFO	54422	NA	NO_INFO	Barhl1	NA
18715	18715	Pim2	2.08	3.03	2.3	2.7	2.41	2.19	2.27	3.68	3.04	3.52	2.98	2.75	58	98	77	89	77	72	2.43333	2.47	3.08333	2.99667	79.3333	77.6667	0.0361337	0.977524	0.888652	Pim2	DXCch3+++Pim-2	mRNA	1	NM_138606	coding	known	NC_000086.7	7878306	7883432	+	X A1.1|X 3.55 cM	18715	NO_INFO	NO_INFO	18715	NA	K08806	Pim2	NA
69090	69090	Ascc1	10.74	12.41	10	8.69	9.94	10.2	11.69	15.04	13.2	11.34	12.3	12.79	209.16	285.16	235.1	203	228	238	9.61	11.05	12.1433	13.31	223	243.14	-0.125905	0.910487	0.505495	Ascc1	1810015P09Rik+++AI550520+++ASC1p50+++CGI-18	mRNA	10	URS00009B890D+++NM_001199187+++NM_026937+++XM_006514039+++XM_006514040+++XM_006514041+++XM_006514042+++XM_017314074+++XM_017314075+++XM_030245250	coding	known	NC_000076.6	60002592	60099990	+	10|10 B4	69090	NO_INFO	NO_INFO	69090	NA	NO_INFO	NA	NA
104156	104156	Etv5	0.31	0.74	0.7	0.32	0.53	0.4	0.33	0.9	0.93	0.42	0.66	0.5	17	48	47	21	34	26	0.416667	0.583333	0.526667	0.72	27	37.3333	-0.424498	0.796173	0.317482	Etv5	1110005E01Rik+++8430401F14Rik+++ERM	mRNA	3	URS00009C0F22+++NM_001358428+++NM_023794	coding	known	NC_000082.6	22381310	22439570	-	16|16 B1	104156	NO_INFO	NO_INFO	104156	NA	K15593	Etv5	NA
11898	11898	Ass1	2700.78	2673.93	3051.49	3126.27	3528.95	3403.68	2941.34	3240.29	4028.56	4079.74	4368.01	4268.17	58082	66586	78626	79395	86933	86040	3352.97	2808.73	4238.64	3403.4	84122.7	67764.7	0.309209	0.288297	0.0269177	Ass1	AA408052+++ASS+++Ass-1+++fold	mRNA	1	NM_007494	coding	known	NC_000068.7	31470270	31520670	+	2 B|2 21.81 cM	11898	NO_INFO	NO_INFO	11898	NA	K01940	Ass1	COG0137///NA
12345	12345	Capzb	60.5	75.13	61.74	67.97	66.88	64.38	65.89	91.05	81.51	88.7	82.78	80.73	1344	1933	1643	1783	1702	1682	66.41	65.79	84.07	79.4833	1722.33	1640	0.0710331	0.948205	0.597558	Capzb	1700120C01Rik+++AI325129+++CPB1+++CPB2+++CPbeat2+++CPbeta1+++CPbeta2+++Cappb1	mRNA	5	URS00009BDE79+++NM_001037761+++NM_001271405+++NM_009798+++XM_006538504	coding	known	NC_000070.6	139192899	139291820	+	4 D3|4 70.59 cM	12345	NO_INFO	NO_INFO	12345	NA	K10365	NA	NA
319478	319478	Cxxc4	0.05	0.04	0.03	0.03	0.03	0.03	0.05	0.05	0.04	0.04	0.04	0.04	6	5	4	3	3	3	0.03	0.04	0.04	0.0466667	3	5	-0.769203	0.865282	0.420231	Cxxc4	9330210J02Rik+++C030003J12Rik+++Idax	mRNA	12	URS00009B043D+++URS00009B1F3A+++URS00009B2475+++URS00009B347D+++URS00009C5451+++NM_001004367+++XM_006501561+++XM_006501563+++XM_006501564+++XM_006501566+++XM_006501568+++XM_030252642	coding	known	NC_000069.6	134236144	134262163	+	3|3 G3	319478	NO_INFO	NO_INFO	319478	NA	K03344	NA	NA
71799	71799	Ptcd1	4.22	4.99	4.83	5.45	5.44	4.35	4.6	6.04	6.38	7.11	6.73	5.45	195	267	268	298	289	237	5.08	4.68	6.43	5.67333	274.667	243.333	0.176228	0.803162	0.325698	Ptcd1	1110069M14Rik	mRNA	2	NM_133735+++XM_011241013	coding	known	NC_000071.6	145147378	145167104	-	5|5 G2	71799	NO_INFO	NO_INFO	71799	NA	NO_INFO	Ptcd1	NA
245126	245126	Tarm1	0	0.14	0	0	0	0	0	0.17	0	0	0	0	0	2	0	0	0	0	0	0.0466667	0	0.0566667	0	0.666667	-1.75753	0.952797	0.664235	Tarm1	9930022N03Rik+++Gm9904+++OLT-2	mRNA	5	URS00009C5BA7+++NM_001362148+++NM_177363+++XM_006539980+++XM_006539983	coding	known	NC_000073.6	3486499	3502754	-	7|7 A1	245126	NO_INFO	NO_INFO	245126	NA	NO_INFO	NA	NA
18109	18109	Mycn	0.27	1.32	0.3	0.58	0.14	0.16	0.3	1.6	0.39	0.75	0.18	0.2	10	56	13	25	6	7	0.293333	0.63	0.376667	0.763333	12.6667	26.3333	-1.02023	0.6286	0.15176	Mycn	N-myc+++Nmyc+++Nmyc-1+++Nmyc1+++bHLHe37+++c-nmyc	mRNA	2	URS00009ADB97+++NM_008709	coding	known	NC_000078.6	12936093	12941836	-	12 A1.1|12 6.14 cM	18109	NO_INFO	NO_INFO	18109	NA	K09109	Mycn	NA
68911	68911	Pygo2	4.43	3.64	3.73	3.61	3.07	3.33	4.83	4.41	4.92	4.72	3.8	4.18	190	195	210	199	163	171	3.33667	3.93333	4.23333	4.72	177.667	198.333	-0.175654	0.843846	0.372885	Pygo2	1190004M21Rik	mRNA	9	URS00009B42E1+++URS00009BD177+++NM_001293763+++NM_001293766+++NM_001293767+++NM_001293768+++NM_026869+++XM_030252784+++XM_030252785	coding	known	NC_000069.6	89430114	89436271	+	3|3 F1	68911	NO_INFO	NO_INFO	68911	NA	NO_INFO	NA	NA
208285	208285	Cyp4f17	5.97	4.97	4.55	8.66	7.72	6.78	6.5	6.02	6.01	11.3	9.56	8.51	235	204	203	387	351	296	7.72	5.16333	9.79	6.17667	344.667	214	0.65449	0.0689017	0.00277743	Cyp4f17	EG208285	mRNA	9	XR_003952100+++NM_001101445+++XM_006523959+++XM_006523960+++XM_006523961+++XM_006523962+++XM_006523963+++XM_011246339+++XM_030249616	coding	known	NC_000083.6	32506192	32530158	+	17|17 B1	208285	NO_INFO	NO_INFO	208285	NA	NO_INFO	NA	NA
228536	228536	Bahd1	2.41	2.77	3	2.81	2.95	2.88	2.63	3.35	3.96	3.67	3.65	3.61	157	210	241	220	224	224	2.88	2.72667	3.64333	3.31333	222.667	202.667	0.141077	0.875847	0.44149	Bahd1	AL022997+++AW541238+++Gm117+++mKIAA0945	mRNA	7	NM_001045523+++XM_006499265+++XM_006499266+++XM_006499267+++XM_030250363+++XM_030250365+++XM_030250366	coding	known	NC_000068.7	118900336	118924528	+	2|2 E5	228536	NO_INFO	NO_INFO	228536	NA	NO_INFO	NA	NA
67480	67480	Cwc25	3.28	3.32	2.94	3.05	3.22	3.1	3.57	4.02	3.89	3.98	3.98	3.89	156	183	168	172	176	174	3.12333	3.18	3.95	3.82667	174	169	0.0322987	0.972521	0.867531	Cwc25	1300013D05Rik+++AA473636+++Ccdc49+++R75228	mRNA	1	NM_026186	coding	known	NC_000077.6	97745470	97766613	-	11|11 D	67480	NO_INFO	NO_INFO	67480	NA	NO_INFO	NA	NA
60409	60409	Trappc4	10.37	13.24	13.61	14.25	13.08	12.23	11.3	16.04	17.96	18.59	16.19	15.34	143	219	231	238	211	205	13.1867	12.4067	16.7067	15.1	218	197.667	0.150133	0.865457	0.425778	Trappc4	1500017G03Rik+++AI303617+++HSPC172+++PTD009+++Sbd+++Sbdn+++Sdcbp2+++TRS23	mRNA	2	NM_021789+++XM_017313498	coding	known	NC_000075.6	44403755	44407548	-	9|9 A5.2	60409	NO_INFO	NO_INFO	60409	NA	NO_INFO	NA	NA
20683	20683	Sp1	1.89	1.96	2.24	1.91	1.86	1.8	2.05	2.38	2.95	2.5	2.3	2.25	222	268	316	267	252	250	1.85667	2.03	2.35	2.46	256.333	268.667	-0.0689549	0.952797	0.689169	Sp1	1110003E12Rik+++AA450830+++AI845540+++Sp1-1	mRNA	3	URS00009AFC6D+++NM_013672+++XM_017316523	coding	known	NC_000081.6	102406316	102436404	+	15|15 F3	20683	NO_INFO	NO_INFO	20683	NA	K04684	NA	NA
223732	223732	Rtl6	0.06	0.12	0.09	0.05	0.04	0.04	0.07	0.14	0.12	0.07	0.05	0.05	4	9	7	4	3	3	0.0433333	0.09	0.0566667	0.11	3.33333	6.66667	-0.982699	0.753332	0.263127	Rtl6	BC058638+++Ldoc1l+++Mar6+++Mart6	mRNA	1	NM_177630	coding	known	NC_000081.6	84553398	84557823	-	15|15 E2	223732	NO_INFO	NO_INFO	223732	NA	NO_INFO	NA	NA
102634778	102634778	Gm32280	0	0	0	0	0.04	0	0	0	0	0	0.05	0	0	0	0	0	1	0	0.0133333	0	0.0166667	0	0.333333	0	0.949827	0.952797	0.815937	Gm32280	NA	mRNA	1	XM_030244764	coding	known	NC_000075.6	48670083	48674689	+	9 A5.3|9	102634778	NO_INFO	NO_INFO	102634778	NA	NO_INFO	NA	NA
22064	22064	Trpc2	0.5	0.23	0	0.16	0.14	0	0.54	0.28	0	0.21	0.18	0	24	13	0	9	8	0.12	0.1	0.243333	0.13	0.273333	5.70667	12.3333	-1.26801	0.932118	0.551371	Trpc2	3010009O07Rik+++AI115608+++TRPC2a+++TRPC2b+++Trrp2+++mTrp2+++smTRPC2+++trp2	mRNA	1	NM_001109897	coding	known	NC_000073.6	102083116	102096864	+	7 E2|7 54.71 cM	22064	NO_INFO	NO_INFO	22064	NA	NO_INFO	Trpc2	NA
67131	67131	Acbd4	15.45	17.01	11.98	19.62	14.66	15.87	16.83	20.62	15.81	25.6	18.15	19.91	439	560	408	659	478	531	16.7167	14.8133	21.22	17.7533	556	469	0.22785	0.73041	0.24116	Acbd4	2010009P05Rik+++2010015A21Rik+++AI849317	mRNA	1	NM_025988	coding	known	NC_000077.6	103101688	103112199	+	11|11 E1	67131	NO_INFO	NO_INFO	67131	NA	NO_INFO	NA	NA
216440	216440	Os9	67.71	84.2	71.2	73.08	73.21	69.03	73.74	102.03	94	95.36	90.61	86.56	3918	5678	4962	5016	4890	4732	71.7733	74.37	90.8433	89.9233	4879.33	4852.67	0.010157	0.994608	0.936479	Os9	4632413K17Rik+++AU022351	mRNA	5	URS00009C1216+++NM_001171026+++NM_177614+++XM_011243420+++XM_030245044	coding	known	NC_000076.6	127093643	127121160	-	10|10 D3	216440	NO_INFO	NO_INFO	216440	NA	K10088	NA	NA
14107	14107	Fat1	1.11	1.81	1.88	2.03	1.57	1.38	1.21	2.2	2.49	2.65	1.95	1.73	251	474	508	543	409	367	1.66	1.6	2.11	1.96667	439.667	411	0.119083	0.944844	0.588689	Fat1	2310038E12Rik+++AU023433+++Fath+++mFat1	mRNA	21	URS000076A582+++URS00009AD142+++URS00009B6C30+++URS00009BB74A+++URS00009C5A1D+++URS0000A90F45+++XR_001778405+++NM_001081286+++XM_006509267+++XM_006509268+++XM_006509270+++XM_006509271+++XM_006509272+++XM_006509273+++XM_006509274+++XM_006509276+++XM_006509277+++XM_011242173+++XM_017312564+++XM_030243287+++XM_030243288	coding	known	NC_000074.6	44933100	45052257	+	8 B1.1|8 24.81 cM	14107	NO_INFO	NO_INFO	14107	NA	NO_INFO	Fat1	NA
633640	633640	Tmem267	4.09	4.29	5.47	13.99	12.2	6.77	4.46	5.2	7.22	18.26	15.1	8.49	106	115	151	350	367	172	10.9867	4.61667	13.95	5.62667	296.333	124	1.25176	0.00126228	1.32295e-05	Tmem267	EG633640+++Gm7120	mRNA	5	URS0000BD4FB9+++NM_001039244+++NM_001177666+++NM_001370626+++NM_001370627	coding	known	NC_000079.6	119488086	119613472	+	13|13 D2.3	633640	NO_INFO	NO_INFO	633640	NA	NO_INFO	NA	NA
230996	230996	9430015G10Rik	2.04	1.99	1.31	1.15	1.19	1.28	2.22	2.41	1.73	1.51	1.47	1.6	73	81	57	49	48	53	1.20667	1.78	1.52667	2.12	50	70.3333	-0.513524	0.511515	0.0884406	9430015G10Rik	NA	mRNA	5	URS00009C0634+++NM_145557+++NM_177205+++XM_006538834+++XM_030253514	coding	known	NC_000070.6	156109998	156130499	+	4|4 E2	230996	NO_INFO	NO_INFO	230996	NA	NO_INFO	NA	NA
233870	233870	Tufm	35.58	68.48	76.3	66.93	67.1	60.66	38.75	82.98	100.73	87.34	83.06	76.06	798	1779	2049	1772	1724	1599	64.8967	60.12	82.1533	74.1533	1698.33	1542	0.179668	0.872183	0.435956	Tufm	2300002G02Rik+++C76308+++C76389+++EF-TuMT+++EFTU	mRNA	3	NM_001163713+++NM_172745+++XM_006507719	coding	known	NC_000073.6	126487271	126490731	+	7|7 F3	233870	NO_INFO	NO_INFO	233870	NA	NO_INFO	NA	COG0050///NA
237625	237625	Pla2g3	0.07	0	0	0.03	0	0	0.08	0	0	0.04	0	0	2	0	0	1	0	0	0.01	0.0233333	0.0133333	0.0266667	0.333333	0.666667	-1.1064	0.952797	0.715391	Pla2g3	sPLA2-III	mRNA	8	XR_003949433+++XR_872206+++NM_172791+++XM_006514689+++XM_006514690+++XM_006514691+++XM_017314512+++XM_030245957	coding	known	NC_000077.6	3488158	3499346	+	11|11 A1	237625	NO_INFO	NO_INFO	237625	NA	K01047	NA	NA
22201	22201	Uba1	41.93	53.12	54.33	52.37	46.55	46.77	45.66	64.37	71.73	68.35	57.62	58.65	2493	3664	3879	3693	3188	3286	48.5633	49.7933	61.54	60.5867	3389	3345.33	0.0271122	0.963066	0.843437	Uba1	A1S9+++Sbx+++Ube-1+++Ube1x	mRNA	5	NM_001136085+++NM_001276316+++NM_001276317+++NM_009457+++XM_030251302	coding	known	NC_000086.7	20658302	20683179	+	X A1.3|X 16.15 cM	22201	NO_INFO	NO_INFO	22201	NA	K03178	NA	COG0476///NA
12631	12631	Cfl1	286.16	237.65	189.19	192.91	198.06	188.83	311.65	287.99	249.77	251.75	245.15	236.79	4165	4001	3295	3307	3290	3220	193.267	237.667	244.563	283.137	3272.33	3820.33	-0.257769	0.664439	0.18002	Cfl1	AA959946+++Cof	mRNA	1	NM_007687	coding	known	NC_000085.6	5490455	5494031	+	19|19 A	12631	NO_INFO	NO_INFO	12631	NA	K05765	Cfl1	NA
13929	13929	Amz2	3.21	3.41	4.44	3.54	4.61	4.09	3.49	4.13	5.87	4.62	5.71	5.13	128	159	216	170	213	194	4.08	3.68667	5.15333	4.49667	192.333	167.667	0.207199	0.823785	0.34627	Amz2	AA408420+++ESTM12+++X83328	mRNA	3	URS0000787191+++NM_001252193+++NM_025275	coding	known	NC_000077.6	109425946	109438148	+	11 E1|11 71.89 cM	13929	NO_INFO	NO_INFO	13929	NA	NO_INFO	NA	COG1913///NA
16205	16205	Gimap1	2.4	2.21	1.92	1.39	1.43	1.7	2.62	2.68	2.54	1.81	1.77	2.13	47	50	45	32	32	39	1.50667	2.17667	1.90333	2.61333	34.3333	47.3333	-0.478601	0.624217	0.149403	Gimap1	IAP38+++Imap38+++imap	mRNA	5	URS0000779CE8+++URS00009AEF53+++URS00009B8A07+++NM_008376+++NM_175860	coding	known	NC_000072.6	48738346	48743795	+	6|6 B2.3	16205	NO_INFO	NO_INFO	16205	NA	NO_INFO	Gimap1	NA
225895	225895	Taf6l	2.3	2.33	2.08	1.59	1.32	1.64	2.51	2.82	2.74	2.07	1.63	2.06	70	82	76	57	46	59	1.51667	2.23667	1.92	2.69	54	76	-0.504078	0.438684	0.0640954	Taf6l	2810417N14Rik+++BB223262+++C530024J06Rik+++Paf65a	mRNA	3	URS00009B7E84+++NM_001177798+++NM_146092	coding	known	NC_000085.6	8774354	8786417	-	19|19 A	225895	NO_INFO	NO_INFO	225895	NA	K03131	NA	NA
18550	18550	Furin	25.59	50.55	54.07	54.73	44.48	41.36	27.87	61.26	71.38	71.42	55.05	51.87	1609	3719	4123	4125	3254	3106	46.8567	43.4033	59.4467	53.5033	3495	3150.33	0.188095	0.867713	0.428907	Furin	9130404I01Rik+++Fur+++PACE+++Pcsk3+++SPC1	mRNA	11	URS00009B4692+++NM_001081454+++NM_011046+++XM_011250818+++XM_011250819+++XM_011250820+++XM_011250821+++XM_011250822+++XM_011250823+++XM_030242209+++XM_030242210	coding	known	NC_000073.6	80389194	80405441	-	7 D2|7 45.65 cM	18550	NO_INFO	NO_INFO	18550	NA	NO_INFO	Furin	NA
239126	239126	C1qtnf9	0.31	0.27	0.24	0.18	0.11	0.2	0.34	0.33	0.32	0.23	0.13	0.25	8	8	7	5	3	6	0.163333	0.273333	0.203333	0.33	4.66667	7.66667	-0.738049	0.823705	0.346162	C1qtnf9	9130217G22Rik+++Adif1+++CTRP9+++Ciqtnf9	mRNA	3	NM_183175+++XM_006518983+++XM_006518984	coding	known	NC_000080.6	60768134	60780869	+	14|14 D1	239126	NO_INFO	NO_INFO	239126	NA	NO_INFO	NA	NA
71521	71521	Pds5a	3.44	4.68	5.29	5.16	4.52	4.75	3.75	5.67	6.98	6.73	5.6	5.95	356	521	602	579	526	535	4.81	4.47	6.09333	5.46667	546.667	493	0.159895	0.8069	0.329339	Pds5a	9030416H16Rik+++B230308N11Rik+++E230024D05Rik	mRNA	13	URS00009AE910+++URS00009AF3C7+++URS00009B0267+++URS00009B7300+++URS00009BC1B8+++URS00009BF205+++URS00009C0CDA+++URS00009C3956+++XR_001784747+++XR_001784748+++NM_001081321+++XM_006504115+++XM_030254809	coding	known	NC_000071.6	65605719	65698236	+	5|5 C3.1	71521	NO_INFO	NO_INFO	71521	NA	NO_INFO	Pds5a	NA
227659	227659	Slc2a6	0.15	0.36	0.14	0.28	0.15	0.1	0.16	0.43	0.19	0.37	0.18	0.12	4	11	5	9	5	3	0.176667	0.216667	0.223333	0.26	5.66667	6.66667	-0.222435	0.952797	0.787904	Slc2a6	A330096C23+++F630103L12Rik+++GLUT-6+++Glut6+++Glut9	mRNA	4	XR_374081+++NM_001177627+++NM_172659+++XM_006497917	coding	known	NC_000068.7	27021363	27028000	-	2|2 A3	227659	NO_INFO	NO_INFO	227659	NA	NO_INFO	Slc2a6	NA
227615	227615	Tmem203	9.37	11.79	7.19	7.57	8.76	8.52	10.2	14.28	9.5	9.88	10.84	10.69	97	141	89	92	103	103	8.28333	9.45	10.47	11.3267	99.3333	109	-0.138971	0.943654	0.586433	Tmem203	C730025P13Rik+++Hbebp1	mRNA	1	NM_177344	coding	known	NC_000068.7	25255439	25256352	+	2|2 A3	227615	NO_INFO	NO_INFO	227615	NA	NO_INFO	NA	NA
19744	19744	Rheb	25.66	21.12	17.63	18.15	21.14	20	27.95	25.59	23.27	23.68	26.16	25.08	508	484	418	424	479	465	19.7633	21.47	24.9733	25.6033	456	470	-0.0729154	0.952797	0.72255	Rheb	Rheb1	mRNA	1	NM_053075	coding	known	NC_000071.6	24802823	24842361	-	5|5 A3	19744	NO_INFO	NO_INFO	19744	NA	K07208	Rheb	NA
100121	100121	Tdrd7	4.5	5.68	5.73	5.36	6.57	5.32	4.9	6.89	7.57	6.99	8.13	6.67	211	332	364	336	400	332	5.75	5.30333	7.26333	6.45333	356	302.333	0.252458	0.673196	0.187069	Tdrd7	5730495N10Rik+++AI447470+++PCTAIRE2BP	mRNA	8	NM_001290475+++NM_001355189+++NM_146142+++XM_006537518+++XM_006537519+++XM_030253049+++XM_030253050+++XM_030253051	coding	known	NC_000070.6	45965027	46034766	+	4|4 B1	100121	NO_INFO	NO_INFO	100121	NA	NO_INFO	NA	NA
12343	12343	Capza2	11.26	14.11	16.38	13.38	15.69	15.37	12.26	17.09	21.62	17.46	19.42	19.27	396	575	691	557	634	637	14.8133	13.9167	18.7167	16.99	609.333	554	0.152765	0.850131	0.390077	Capza2	1110053K06Rik+++AW208808+++Cappa2	mRNA	2	URS00009C5A46+++NM_007604	coding	known	NC_000072.6	17637010	17666972	+	6 A2|6 7.96 cM	12343	NO_INFO	NO_INFO	12343	NA	K10364	NA	NA
117198	117198	Ivns1abp	20.04	34.58	32.47	24.77	32.48	30.95	21.83	41.9	42.86	32.33	40.21	38.81	1034	2055	1982	1487	1914	1879	29.4	29.03	37.1167	35.53	1760	1690.33	0.0906716	0.952797	0.659254	Ivns1abp	1190004M08Rik+++1700126I16Rik+++AA960440+++HSPC068+++ND1+++NS-1+++NS1-BP+++Nd1-L+++Nd1-S+++mKIAA0850	mRNA	7	NM_001039511+++NM_001039512+++NM_001359262+++NM_001359263+++NM_054102+++XM_006529089+++XM_030243144	coding	known	NC_000067.6	151344486	151364445	+	1|1 G1	117198	NO_INFO	NO_INFO	117198	NA	NO_INFO	Ivns1abp	NA
14569	14569	Gdi2	67.96	64.51	82.13	77.64	84.2	84.68	74.01	78.18	108.42	101.32	104.22	106.19	2571	2829	3727	3477	3661	3777	82.1733	71.5333	103.91	86.87	3638.33	3042.33	0.256351	0.53392	0.100253	Gdi2	GDI-B+++GDIB+++Gdi3	mRNA	3	URS00009B440B+++URS00009B60D6+++NM_008112	coding	known	NC_000079.6	3538075	3566261	+	13|13 A1	14569	NO_INFO	NO_INFO	14569	NA	NO_INFO	NA	NA
83770	83770	Tas1r2	0	0.02	0.02	0.08	0	0.06	0	0.02	0.03	0.1	0	0.07	0	1	1	4	0	3	0.0466667	0.0133333	0.0566667	0.0166667	2.33333	0.666667	1.84067	0.798147	0.319457	Tas1r2	Gpr71+++T1r2+++TR2	mRNA	1	NM_031873	coding	known	NC_000070.6	139653538	139670280	+	4 D3|4 70.82 cM	83770	NO_INFO	NO_INFO	83770	NA	K04625	NA	NA
242584	242584	Wdr78	0.22	0.08	0.08	0.17	0.19	0.07	0.24	0.09	0.1	0.22	0.23	0.09	12	5	5	11	12	4	0.143333	0.126667	0.18	0.143333	9	7.33333	0.222165	0.952797	0.771864	Wdr78	BC028975+++Wdr78	mRNA	13	URS00009B21F9+++XR_376318+++XR_376319+++NM_146254+++XM_006503077+++XM_006503078+++XM_017320216+++XM_017320218+++XM_030253558+++XM_030253559+++XM_030253560+++XM_030253561+++XM_030253562	coding	known	NC_000070.6	103038065	103114299	+	4|4 C6	242584	NO_INFO	NO_INFO	242584	NA	NO_INFO	Dnai4	NA
26407	26407	Map3k4	2.17	2.93	2.89	3.17	3	2.99	2.36	3.55	3.82	4.14	3.72	3.75	166	266	272	293	271	276	3.05333	2.66333	3.87	3.24333	280	234.667	0.266459	0.60565	0.138717	Map3k4	D17Rp17+++D17Rp17e+++MAPKKK4+++MEKK 4+++MTK1+++Mek4b+++Mekk4+++RP17+++Rp17a+++Tas+++mKIAA0213	mRNA	5	URS00009B7F66+++NM_001357722+++NM_011948+++XM_030249819+++XM_030249820	coding	known	NC_000083.6	12227621	12318796	-	17 8.42 cM|17 A1	26407	NO_INFO	NO_INFO	26407	NA	K04428	NA	NA
66513	66513	Tab1	1.14	1.5	1.29	1.49	1.35	0.85	1.25	1.82	1.71	1.94	1.67	1.06	49	73	66	74	65	42	1.23	1.31	1.55667	1.59333	60.3333	62.6667	-0.0535075	0.969074	0.859164	Tab1	2310012M03Rik+++Map3k7ip1+++b2b449Clo	mRNA	3	URS00009B310A+++NM_025609+++XM_006521259	coding	known	NC_000081.6	80133127	80161707	+	15|15 E1	66513	NO_INFO	NO_INFO	66513	NA	K04403	Tab1	NA
54367	54367	Zfp326	2.74	3.02	2.66	3.09	3.22	2.85	2.98	3.66	3.51	4.03	3.99	3.58	103	130	115	130	129	123	3.05333	2.80667	3.86667	3.38333	127.333	116	0.128157	0.928976	0.545806	Zfp326	5730470H14Rik+++ZAN75+++Znf326	mRNA	8	NR_030777+++URS00009B0C90+++URS00009BBD25+++URS00009C23AD+++NM_018759+++XM_006535128+++XM_006535131+++XM_030254703	coding	known	NC_000071.6	105876556	105917742	+	5|5 E5	54367	NO_INFO	NO_INFO	54367	NA	NO_INFO	Zfp326	NA
66912	66912	Bzw2	7.01	6.25	4.66	3.88	4.85	5.69	7.63	7.57	6.15	5.06	6	7.13	219.96	236	173.91	140.91	168.98	205.98	4.80667	5.97333	6.06333	7.11667	171.957	209.957	-0.314286	0.69668	0.20894	Bzw2	1110001I24Rik+++Bdm2+++HSPC028	mRNA	4	URS00009B057D+++URS00009BDBCA+++NM_025840+++XM_006515166	coding	known	NC_000078.6	36091835	36156841	-	12|12 A3	66912	NO_INFO	NO_INFO	66912	NA	NO_INFO	Bzw2	NA
232089	232089	Elmod3	21.02	18.02	18.36	27.11	22.57	21.9	22.89	21.83	24.23	35.38	27.93	27.46	648	646	681	993	800	790	23.86	19.1333	30.2567	22.9833	861	658.333	0.364258	0.321525	0.0334585	Elmod3	AI844780+++C330008I15Rik+++RBM29+++Rbed1	mRNA	7	NM_001253692+++NM_001364553+++NM_001364554+++NM_144917+++XM_030255333+++XM_030255334+++XM_030255335	coding	known	NC_000072.6	72565922	72598431	-	6|6 C1	232089	NO_INFO	NO_INFO	232089	NA	NO_INFO	NA	NA
108143	108143	Taf9	26.25	27.82	22.4	21.51	28.06	26.61	28.59	33.71	29.57	28.07	34.74	33.37	398	487.94	406.63	384.53	486	473	25.3933	25.49	32.06	30.6233	447.843	430.857	0.0486294	0.952797	0.79556	Taf9	2310012M09Rik+++AA673500+++AU045423+++TAFII31+++TAFII32+++Taf2g	mRNA	2	NM_001015889+++NM_027139	coding	known	NC_000079.6	100651343	100656060	+	13|13 D1	108143	NO_INFO	NO_INFO	108143	NA	K14535	NA	NA
170441	170441	Slc2a10	0.06	0.03	0	0.09	0.05	0.03	0.07	0.04	0	0.11	0.07	0.04	3	2	0	5	3	2	0.0566667	0.03	0.0733333	0.0366667	3.33333	1.66667	0.921994	0.897323	0.479142	Slc2a10	AA450473+++Glut10	mRNA	1	NM_130451	coding	known	NC_000068.7	165503897	165519917	+	2 H3|2 85.66 cM	170441	NO_INFO	NO_INFO	170441	NA	NO_INFO	Slc2a10	NA
105428	105428	Fam149b	11.64	12.4	12.41	10.64	11.57	12.2	12.68	15.03	16.39	13.88	14.32	15.3	272	381	390	346	359	373	11.47	12.15	14.5	14.7	359.333	347.667	0.0530124	0.952797	0.741631	Fam149b	AA536717+++AI428773+++Fam149b1+++mKIAA0974	mRNA	23	URS00009AD51D+++URS00009B96FF+++XR_001781072+++XR_001781074+++XR_001781075+++XR_001781076+++XR_001781077+++XR_003950809+++NM_001024512+++NM_001177633+++NM_001360364+++NM_001360365+++NM_172379+++XM_006518328+++XM_006518330+++XM_006518334+++XM_006518336+++XM_006518337+++XM_011244880+++XM_017315748+++XM_017315752+++XM_030247576+++XM_030247577	coding	known	NC_000080.6	20348158	20383491	+	14|14 A3	105428	NO_INFO	NO_INFO	105428	NA	NO_INFO	NA	NA
259300	259300	Ehd2	0.71	1.26	1.02	0.89	0.78	0.84	0.77	1.53	1.35	1.16	0.97	1.06	41	82	60	57	50	50	0.836667	0.996667	1.06333	1.21667	52.3333	61	-0.207711	0.901074	0.488905	Ehd2	BC027084+++C130052H20Rik	mRNA	2	NM_153068+++XM_011250582	coding	known	NC_000073.6	15946963	15967535	-	7 A2|7 8.65 cM	259300	NO_INFO	NO_INFO	259300	NA	K12469	Ehd2	NA
56046	56046	Uqcc1	9.33	11.83	10.57	11.09	11.22	12.1	10.17	14.34	13.96	14.48	13.89	15.17	350	518	477	495	485	537	11.47	10.5767	14.5133	12.8233	505.667	448.333	0.17898	0.738999	0.246999	Uqcc1	2310079L17Rik+++2410003P15Rik+++3110038N19Rik+++Bfzb+++Bfzp+++Cbp3+++Uqcc	mRNA	16	URS00009AD878+++URS00009B5B8E+++URS00009B6EF2+++URS00009B76AA+++URS00009BF826+++URS00009C1353+++XR_003953678+++XR_003953679+++NM_001355441+++NM_001355442+++NM_001355443+++NM_018888+++XM_006499922+++XM_011239705+++XM_011239706+++XM_030251889	coding	known	NC_000068.7	155842575	155930310	+	2|2 H1	56046	NO_INFO	NO_INFO	56046	NA	NO_INFO	Uqcc1	NA
18858	18858	Pmp22	2.16	2.83	1.99	2.68	2.44	2.04	2.35	3.43	2.62	3.49	3.02	2.56	54	82	59	79	70	60	2.38667	2.32667	3.02333	2.8	69.6667	65	0.0976216	0.952797	0.724782	Pmp22	22kDa+++Gas-3+++HNPP+++TRE002+++Tr+++trembler	mRNA	10	URS00009C3B12+++NM_001302255+++NM_001302257+++NM_001302258+++NM_001302259+++NM_001302260+++NM_001302261+++NM_008885+++XM_030245661+++XM_030245662	coding	known	NC_000077.6	63128982	63159547	+	11 B3|11 38.99 cM	18858	NO_INFO	NO_INFO	18858	NA	NO_INFO	Pmp22	NA
232210	232210	Hmces	4.93	3.45	3.47	3.76	3.78	3.31	5.37	4.18	4.58	4.91	4.68	4.15	89	72	75	80	78	70	3.61667	3.95	4.58	4.71	76	78.6667	-0.0814579	0.952797	0.771579	Hmces	8430410A17Rik+++C85376+++Srap1	mRNA	3	XR_001785121+++XR_377441+++NM_173737	coding	known	NC_000072.6	87913907	87936619	+	6|6 D1	232210	NO_INFO	NO_INFO	232210	NA	NO_INFO	NA	NA
114644	114644	Slc13a3	2.18	4.77	4.5	3.17	2.22	2.84	2.38	5.78	5.94	4.14	2.74	3.56	101	256	250	174	118	155	2.74333	3.81667	3.48	4.7	149	202.333	-0.406072	0.615882	0.144243	Slc13a3	NaDC-3+++NaDC3+++SDCT2	mRNA	1	NM_054055	coding	known	NC_000068.7	165405295	165473197	-	2|2 H3	114644	NO_INFO	NO_INFO	114644	NA	NO_INFO	Slc13a3	COG0471///NA
80733	80733	Car15	0.66	0.59	0.31	0.96	0.39	0.53	0.72	0.71	0.41	1.25	0.49	0.67	10	11	5	16	6	9	0.626667	0.52	0.803333	0.613333	10.3333	8.66667	0.215262	0.952797	0.753457	Car15	AI315043+++Ca15+++Cals2	mRNA	3	NM_030558+++XM_017317165+++rna-NM_030558.2-2	coding	known	NT_187007.1	92763	17838186	-	16 A3|16 11.05 cM	80733	NO_INFO	NO_INFO	80733	NA	K01672	NA	NA
211924	211924	Dsg1c	2.85	2.86	2.86	2.6	3.08	3.62	3.1	3.47	3.78	3.39	3.82	4.54	170	198	205	184	212	255	3.1	2.85667	3.91667	3.45	217	191	0.179442	0.848144	0.385255	Dsg1c	Dsg1gamma+++Dsg6+++dsg1g	mRNA	1	NM_181680	coding	known	NC_000084.6	20247340	20285031	+	18 A2|18 11.26 cM	211924	NO_INFO	NO_INFO	211924	NA	K07596	NA	NA
12955	12955	Cryab	5.23	10.27	4.26	4.58	4.54	6.27	5.7	12.44	5.62	5.97	5.62	7.87	64	136	72	69	65	90	5.13	6.58667	6.48667	7.92	74.6667	90.6667	-0.265858	0.85129	0.39111	Cryab	Crya-2+++Crya2+++HspB5+++P23	mRNA	7	URS00009BA2AA+++NM_001289782+++NM_001289784+++NM_001289785+++NM_009964+++XM_006509970+++XM_030244036	coding	known	NC_000075.6	50745951	50756636	+	9 A5.3|9 27.75 cM	12955	NO_INFO	NO_INFO	12955	NA	K09542	Cryab	NA
386454	386454	Rnf39	4.03	4.22	5.06	5.46	4.69	4.02	4.38	5.11	6.69	7.12	5.81	5.04	75	91	113	120	100	88	4.72333	4.43667	5.99	5.39333	102.667	93	0.141295	0.936666	0.559685	Rnf39	BC038661+++Gm1786+++Gm1787+++Gm320+++LIRF	mRNA	4	NM_001099632+++rna-NM_001099632.1-2+++rna-NM_001099632.1-3+++rna-NM_001099632.1-4	coding	known	NT_187004.1	897869	36947986	+	17|17 B1	386454	NO_INFO	NO_INFO	386454	NA	NO_INFO	NA	NA
69740	69740	Dph5	2.97	4.08	3.05	2.97	2.3	3.19	3.24	4.95	4.03	3.88	2.85	4.01	61	97	75	72	54	77	2.82	3.36667	3.58	4.07333	67.6667	77.6667	-0.197062	0.892709	0.47096	Dph5	2410012M04Rik+++AU045680+++C80186	mRNA	6	URS00009B6381+++URS00009BBDFD+++XR_003954378+++XR_003954379+++XR_003954380+++NM_027193	coding	known	NC_000069.6	115888116	115934361	+	3|3 G1	69740	NO_INFO	NO_INFO	69740	NA	NO_INFO	NA	COG1798///NA
212503	212503	Paox	20.99	19.17	23.75	15.96	17.93	18.59	22.86	23.22	31.35	20.83	22.19	23.31	358	420	589	383	420	444	17.4933	21.3033	22.11	25.81	415.667	455.667	-0.126498	0.910487	0.50505	Paox	2410012F02Rik+++AI118225+++Pao	mRNA	12	URS00009BDD2D+++XR_001785516+++NM_001346725+++NM_153783+++XM_006536166+++XM_006536167+++XM_006536168+++XM_011249839+++XM_011249841+++XM_017322102+++XM_017322103+++XM_030242334	coding	known	NC_000073.6	140115735	140137224	+	7|7 F4	212503	NO_INFO	NO_INFO	212503	NA	K00308	NA	NA
214158	214158	Trim38	0	0	0.04	0.04	0	0	0	0	0.06	0.06	0	0	0	0	1	1	0	0	0.0133333	0.0133333	0.02	0.02	0.333333	0.333333	-0.0119437	0.999812	0.997401	Trim38	Gm23	mRNA	3	NM_001029935+++XM_006516637+++XM_011244303	coding	known	NC_000079.6	23778500	23791731	+	13|13 A3.1	214158	NO_INFO	NO_INFO	214158	NA	NO_INFO	NA	NA
60599	60599	Trp53inp1	3.04	5.19	3.42	5.42	5.94	6.33	3.31	6.29	4.51	7.08	7.35	7.94	244	484	330	517	550	601	5.89667	3.88333	7.45667	4.70333	556	352.667	0.674818	0.0353485	0.00103251	Trp53inp1	2700057G22Rik+++SIP+++SIP18+++SIP27+++Stinp+++Teap+++Tp53inp1+++p53DINP1	mRNA	3	URS00009AE94B+++NM_001199105+++NM_021897	coding	known	NC_000070.6	11156441	11174379	+	4|4 A1	60599	NO_INFO	NO_INFO	60599	NA	NO_INFO	Trp53inp1	NA
21834	21834	Thrb	3.76	3.74	4.56	3.66	3.41	3.33	4.09	4.53	6.02	4.77	4.23	4.17	397	432	526	461	396	391	3.46667	4.02	4.39	4.88	416	451.667	-0.127433	0.876314	0.442967	Thrb	Nr1a2+++T3R[b]+++T3Rbeta+++Thrb1+++Thrb2+++c-erbAbeta	mRNA	28	URS00009B328D+++URS00009B5E3F+++URS00009B6599+++URS00009B8CC9+++URS00009BB066+++URS00009BCE26+++URS00009C2FCB+++URS00009C5CC9+++NM_001113417+++NM_009380+++XM_006517966+++XM_006517967+++XM_006517968+++XM_006517970+++XM_006517971+++XM_006517972+++XM_011244737+++XM_011244738+++XM_011244739+++XM_011244740+++XM_011244741+++XM_011244742+++XM_011244743+++XM_011244745+++XM_017315947+++XM_017315948+++XM_0…	coding	known	NC_000080.6	17658235	18040097	+	14|14 A1	21834	NO_INFO	NO_INFO	21834	NA	K08362	Thrb	NA
239833	239833	Lmln	0.19	0.4	0.41	0.25	0.22	0.31	0.2	0.48	0.55	0.32	0.27	0.39	16	41	37	26	19	28	0.26	0.333333	0.326667	0.41	24.3333	31.3333	-0.336732	0.865457	0.422992	Lmln	5330415H22Rik+++AI465495	mRNA	6	XR_384560+++XR_384561+++XR_384562+++XR_384563+++NM_172823+++XM_030249110	coding	known	NC_000082.6	33061870	33127695	+	16|16 B3	239833	NO_INFO	NO_INFO	239833	NA	NO_INFO	Lmln	NA
70361	70361	Lman1	32.46	51.29	71.73	59.55	49.66	42.96	35.35	62.15	94.7	77.71	61.47	53.88	1664	2951	3491	3103	2663	2537	50.7233	51.8267	64.3533	64.0667	2767.67	2702	0.0598263	0.952797	0.75592	Lman1	2610020P13Rik+++AI326273+++AU043785+++C730041J05+++ERGIC53+++F5F8D+++MCFD1+++MR60+++P58+++gp58	mRNA	3	URS00009C3883+++NM_001172062+++NM_027400	coding	known	NC_000084.6	65980739	66002635	-	18|18 E1	70361	NO_INFO	NO_INFO	70361	NA	K10080	NA	NA
121021	121021	Cspg4	0	0.04	0.01	0.01	0	0.01	0	0.04	0.01	0.02	0	0.01	0	5	1	2	0	1	0.00666667	0.0166667	0.01	0.0166667	1	2	-0.932359	0.95235	0.611748	Cspg4	4732461B14Rik+++AN2+++Cspg4a+++NG2	mRNA	1	NM_139001	coding	known	NC_000075.6	56865104	56899870	+	9|9 B	121021	NO_INFO	NO_INFO	121021	NA	NO_INFO	Cspg4	NA
68611	68611	Mrpl28	35.42	53.85	43.83	48.65	46.43	45.69	38.58	65.26	57.87	63.48	57.46	57.29	450	791	666	727	672	679	46.9233	44.3667	59.41	53.9033	692.667	635.667	0.137488	0.857601	0.40379	Mrpl28	1110015G04Rik+++L28mt+++MAAT1+++MRP-L28+++p15	mRNA	1	NM_024227	coding	known	NC_000083.6	26123503	26126613	+	17|17 A3.3	68611	NO_INFO	NO_INFO	68611	NA	K02902	NA	COG0227///NA
11481	11481	Acvr2b	0.67	0.41	0.49	0.65	0.68	0.76	0.73	0.5	0.64	0.85	0.84	0.95	108	79	95	123	124	145	0.696667	0.523333	0.88	0.623333	130.667	94	0.441917	0.528969	0.0972974	Acvr2b	4930516B21Rik+++AI047905+++ActRIIB	mRNA	10	URS00009B056A+++URS00009BE4E5+++URS00009BF53B+++URS00009C1B9E+++URS0000AA47E7+++XR_379846+++NM_001313757+++NM_007397+++XM_006511926+++XM_030244026	coding	known	NC_000075.6	119401583	119444831	+	9|9 F3	11481	NO_INFO	NO_INFO	11481	NA	K13596	NA	NA
76866	76866	Morn1	0.93	0.66	0.45	1.5	1.09	1.3	1.01	0.8	0.59	1.96	1.35	1.63	27	23	18	44	35	39	1.29667	0.68	1.64667	0.8	39.3333	22.6667	0.762776	0.398001	0.0514377	Morn1	2900057D20Rik+++4930417P05Rik+++AU042805	mRNA	46	URS00009B0170+++URS00009BA7F5+++URS00009C009C+++XR_001784216+++XR_003955037+++XR_003955038+++XR_003955039+++XR_003955040+++XR_003955041+++XR_003955042+++XR_003955043+++XR_003955044+++XR_003955045+++XR_003955046+++XR_003955047+++XR_003955048+++XR_003955049+++XR_003955050+++XR_003955051+++XR_003955052+++NM_001081100+++NM_001356327+++XM_006539261+++XM_006539262+++XM_006539263+++XM_006539267+++XM_006…	coding	known	NC_000070.6	155083643	155145507	+	4|4 E2	76866	NO_INFO	NO_INFO	76866	NA	NO_INFO	Morn1	NA
75578	75578	Fggy	37.67	29.64	29.73	27.95	38.28	33.36	41.03	35.92	39.25	36.47	47.38	41.84	737	817	898	825	1095	1000	33.1967	32.3467	41.8967	38.7333	973.333	817.333	0.24646	0.640126	0.161235	Fggy	2310009E04Rik	mRNA	29	URS00009B85DB+++URS00009BA0D8+++URS00009C4A54+++XR_001784213+++NM_001113412+++NM_029347+++XM_006503461+++XM_006503468+++XM_006503470+++XM_006503472+++XM_006503474+++XM_006503475+++XM_006503476+++XM_011240633+++XM_011240635+++XM_011240636+++XM_011240637+++XM_011240639+++XM_011240643+++XM_011240644+++XM_011240645+++XM_017320429+++XM_017320430+++XM_017320431+++XM_030253870+++XM_030253871+++XM_030253…	coding	known	NC_000070.6	95557480	95926939	+	4|4 C5	75578	NO_INFO	NO_INFO	75578	NA	NO_INFO	NA	NA
72515	72515	Wdr43	4.96	7	6.63	5.65	4.78	5.46	5.4	8.48	8.75	7.37	5.92	6.85	247	404	396	333	274	321	5.29667	6.19667	6.71333	7.54333	309.333	349	-0.162568	0.835432	0.361373	Wdr43	2610318G08Rik+++AU020887+++AV024208+++Wrd43+++mKIAA0007	mRNA	3	URS00009B1112+++XR_385368+++NM_175639	coding	known	NC_000083.6	71616178	71659031	+	17|17 E1.3	72515	NO_INFO	NO_INFO	72515	NA	K14546	NA	NA
140743	140743	Rem2	0	0	0	0.1	0.07	0	0	0	0	0.13	0.08	0	0	0	0	3	2	0	0.0566667	0	0.07	0	1.66667	0	3.15563	0.704392	0.216473	Rem2	AW411893	mRNA	2	URS00009AE36F+++NM_080726	coding	known	NC_000080.6	54476100	54483062	+	14|14 C2	140743	NO_INFO	NO_INFO	140743	NA	NO_INFO	NA	NA
56739	56739	Rec8	0.57	1.23	1.1	1.32	0.74	0.82	0.62	1.49	1.45	1.73	0.92	1.03	16	38	36	44	24	27	0.96	0.966667	1.22667	1.18667	31.6667	30	0.0983067	0.952797	0.812364	Rec8	Rec8L1+++mrec	mRNA	4	XR_001781136+++NM_001360389+++NM_001360390+++NM_020002	coding	known	NC_000080.6	55618002	55625395	+	14 C3|14 28.19 cM	56739	NO_INFO	NO_INFO	56739	NA	K13054	NA	NA
104799	104799	Vipas39	5.48	5.68	5.51	4.41	4.81	4.62	5.97	6.88	7.28	5.76	5.95	5.79	196	236	237	187	198	195	4.61333	5.55667	5.83333	6.71	193.333	223	-0.211044	0.730981	0.24153	Vipas39	6720456H09Rik+++9330175H22Rik+++AI413782+++SPE-39+++Spe39+++Vipar+++hSPE-39	mRNA	7	URS00009BCA90+++NM_001142580+++NM_001142581+++NM_134044+++XM_006515339+++XM_011243976+++XM_011243977	coding	known	NC_000078.6	87238875	87266378	-	12|12 D2	104799	NO_INFO	NO_INFO	104799	NA	NO_INFO	NA	NA
50849	50849	Rnf10	52.28	61.18	64.25	66.78	56.79	48.07	56.94	74.13	84.82	87.14	70.3	60.28	2018	3131	3426	3514	2899	2521	57.2133	59.2367	72.5733	71.9633	2978	2858.33	0.071271	0.952797	0.677864	Rnf10	AA675014+++RIE2+++mKIAA0262	mRNA	6	NM_001302448+++NM_001302449+++NM_016698+++XM_006530404+++XM_017320970+++XM_030254658	coding	known	NC_000071.6	115241770	115272921	-	5 F|5 56.01 cM	50849	NO_INFO	NO_INFO	50849	NA	NO_INFO	NA	NA
432613	432613	Trim80	3.59	1.58	2.52	1.52	1.76	1.36	3.91	1.92	3.32	1.98	2.18	1.71	94	48	79	47	53	42	1.54667	2.56333	1.95667	3.05	47.3333	73.6667	-0.687696	0.420657	0.0575789	Trim80	4933422H20Rik+++Trim47l	mRNA	1	NM_001033775	coding	known	NC_000077.6	115440545	115448268	+	11|11 E2	432613	NO_INFO	NO_INFO	432613	NA	NO_INFO	NA	NA
27366	27366	Txnl4a	41.41	53.04	49.48	46.38	42.6	42.34	45.09	64.27	65.32	60.52	52.73	53.09	690	1127	1171	1094	871	943	43.7733	47.9767	55.4467	58.2267	969.333	996	-0.0254644	0.975456	0.877638	Txnl4a	D18Wsu98e+++Dim1+++Txnl4+++U5-15kD+++U5-15kDa	mRNA	8	XR_386372+++NM_001038608+++NM_001042408+++NM_025299+++NM_178604+++XM_006526487+++XM_030250484+++XM_030250485	coding	known	NC_000084.6	80206798	80225851	+	18 E3|18 53.34 cM	27366	NO_INFO	NO_INFO	27366	NA	K12859	NA	COG0526///NA
14679	14679	Gnai3	13.37	14.06	14.92	16.24	13.03	14.33	14.56	17.04	19.7	21.2	16.13	17.96	629	767	842	905	705	795	14.5333	14.1167	18.43	17.1	801.667	746	0.0982992	0.913763	0.51233	Gnai3	AI158965+++AW537698+++Galphai3+++Gnai-3+++Hg1a	mRNA	1	NM_010306	coding	known	NC_000069.6	108107275	108146152	-	3 F2.3|3 46.83 cM	14679	NO_INFO	NO_INFO	14679	NA	K04630	NA	NA
13853	13853	Epm2a	0.08	0.74	1.23	0.92	0.95	0.46	0.08	0.89	1.62	1.2	1.18	0.58	1	11	19	14	14	7	0.776667	0.683333	0.986667	0.863333	11.6667	10.3333	0.24611	0.952797	0.744382	Epm2a	TG-B+++Tg(TcraK,TcrbK)TG-BFlv	mRNA	4	URS00009B6110+++URS00009BAEB9+++XR_003948588+++NM_010146	coding	known	NC_000076.6	11342691	11459664	+	10|10 A1	13853	NO_INFO	NO_INFO	13853	NA	NO_INFO	NA	NA
107392	107392	Brms1	20.65	20.18	15.59	15.93	15.83	15.86	22.49	24.45	20.59	20.78	19.6	19.89	366	414	331	333	321	330	15.8733	18.8067	20.09	22.51	328	370.333	-0.194406	0.780525	0.297743	Brms1	AV003220+++AW554636	mRNA	2	URS00009C5CD8+++NM_134155	coding	known	NC_000085.6	5041354	5049917	+	19|19 A	107392	NO_INFO	NO_INFO	107392	NA	NO_INFO	NA	NA
15369	15369	Hmox2	63.35	70.07	54.49	54.14	64.91	58.65	68.99	84.91	71.93	70.66	80.34	73.55	1001	1280	1035	1001	1163	1080	59.2333	62.6367	74.85	75.2767	1081.33	1105.33	-0.0393386	0.952797	0.81017	Hmox2	HO-2+++HO2	mRNA	10	URS000076A27A+++URS00009B0AED+++URS00009B718B+++URS00009B7E6F+++URS00009C0096+++URS00009C5762+++NM_001136066+++NM_001357050+++NM_010443+++XM_006521804	coding	known	NC_000082.6	4726361	4766741	+	16 A1|16 2.46 cM	15369	NO_INFO	NO_INFO	15369	NA	K21418	NA	COG5398///NA
233724	233724	Tmem41b	4.02	3.26	3.23	3.2	3.2	3.05	4.38	3.95	4.26	4.18	3.96	3.83	221	209	215	211	205	197	3.15	3.50333	3.99	4.19667	204.333	215	-0.0963245	0.952797	0.633107	Tmem41b	1500015G02Rik+++1500031M19Rik+++AU018901+++D7Ertd70e+++D7Ertd743e	mRNA	4	URS00009AE5E1+++URS00009C3DFF+++NM_153525+++XM_030242499	coding	known	NC_000073.6	109971215	109986804	-	7 E3|7 57.69 cM	233724	NO_INFO	NO_INFO	233724	NA	NO_INFO	NA	NA
57915	57915	Tbc1d1	1.99	2.08	2.1	2.05	1.67	1.31	2.17	2.52	2.78	2.68	2.07	1.65	92	127	140	120	105	86	1.67667	2.05667	2.13333	2.49	103.667	119.667	-0.203906	0.848058	0.378105	Tbc1d1	1110062G02Rik+++AI385682+++AW555803+++Nob1+++Nobq1+++Tbc1+++mKIAA1108	mRNA	15	URS00009AEE34+++URS00009B0826+++URS00009BB1EC+++URS00009BF150+++NM_001289514+++NM_001310611+++NM_019636+++XM_006504036+++XM_006504037+++XM_006504038+++XM_011240757+++XM_011240758+++XM_011240759+++XM_030254739+++XM_030254740	coding	known	NC_000071.6	64156305	64351486	+	5 C3.1|5 32.8 cM	57915	NO_INFO	NO_INFO	57915	NA	K18341	NA	NA
84036	84036	Kcnn1	1.9	2.27	1.59	1.57	1.53	1.88	2.06	2.75	2.09	2.05	1.89	2.36	48	71	79	77	73	78	1.66	1.92	2.1	2.3	76	66	0.211558	0.864531	0.416177	Kcnn1	AI854248+++KCa2.1+++SK1	mRNA	14	URS00009BDC84+++XR_003947357+++XR_379049+++XR_870467+++NM_001363407+++NM_001363408+++NM_032397+++XM_006509806+++XM_006509808+++XM_030243865+++XM_030243866+++rna-NM_001363407.1-2+++rna-NM_001363408.1-2+++rna-NM_032397.3-2	coding	known	NW_016097320.1	167439	70865691	+	8|8 B3.3	84036	NO_INFO	NO_INFO	84036	NA	K04942	NA	NA
233103	233103	4931406P16Rik	1.89	2.27	2.8	2.39	2.66	2.75	2.05	2.76	3.7	3.12	3.29	3.45	167	231	295	251	266	282	2.6	2.32	3.28667	2.83667	266.333	231	0.217514	0.761231	0.269895	4931406P16Rik	4931406P16Rik+++AA553327+++mKIAA0355	mRNA	12	NM_172741+++XM_006539893+++XM_006539894+++XM_006539895+++XM_006539896+++XM_006539897+++XM_006539899+++XM_030242458+++XM_030242459+++XM_030242460+++XM_030242461+++XM_030242462	coding	known	NC_000073.6	34236707	34313561	-	7|7 B1	233103	NO_INFO	NO_INFO	233103	NA	NO_INFO	Garre1	NA
19363	19363	Rad51b	2.47	0.79	0.85	2.57	1.07	1	2.68	0.96	1.13	3.35	1.32	1.26	54	20	23	67	27	26	1.54667	1.37	1.97667	1.59	40	32.3333	0.199584	0.952797	0.70813	Rad51b	AI553500+++R51H2+++Rad51l1+++mREC2	mRNA	35	URS00009AD0F3+++URS00009B36B1+++URS00009B5844+++URS00009BF02A+++URS00009BF936+++URS00009C0728+++URS00009C29A3+++URS00009C2E73+++URS00009C400D+++URS00009C5E98+++URS0000AE93C8+++XR_003950003+++XR_003950004+++XR_003950005+++XR_003950006+++XR_003950007+++XR_003950008+++XR_003950009+++XR_003950010+++XR_003950011+++XR_003950012+++XR_003950013+++XR_003950014+++XR_003950015+++XR_003950016+++XR_003950017+…	coding	known	NC_000078.6	79297282	79848260	+	12|12 C3	19363	NO_INFO	NO_INFO	19363	NA	K10869	NA	NA
14269	14269	Fnbp1	2.67	3.29	3.01	2.51	2.67	2.73	2.91	3.99	3.97	3.28	3.3	3.42	219	310	277	258	254	248	2.63667	2.99	3.33333	3.62333	253.333	268.667	-0.0839195	0.952797	0.61923	Fnbp1	1110057E06Rik+++2210010H06Rik+++FBP1+++Fbp17	mRNA	29	URS00009AFE9A+++URS00009BC8E5+++URS00009BD76E+++URS00009BDA46+++XR_374060+++NM_001038700+++NM_001177648+++NM_001177649+++NM_001177650+++NM_001355105+++NM_001355106+++NM_019406+++XM_006497684+++XM_006497685+++XM_006497686+++XM_006497687+++XM_006497688+++XM_006497689+++XM_006497690+++XM_006497691+++XM_006497692+++XM_006497693+++XM_006497694+++XM_006497695+++XM_017315551+++XM_030247489+++XM_03024749…	coding	known	NC_000068.7	31026206	31145454	-	2|2 B	14269	NO_INFO	NO_INFO	14269	NA	K20121	Fnbp1	NA
214240	214240	Disp2	0.29	0.27	0.54	0.76	0.58	0.63	0.31	0.33	0.71	0.99	0.72	0.79	28	29	63	83	64	70	0.656667	0.366667	0.833333	0.45	72.3333	40	0.862276	0.18274	0.012398	Disp2	AI840597+++B230210L08Rik+++DispB+++mKIAA1742	mRNA	5	NM_170593+++XM_006499107+++XM_017316979+++XM_030249308+++XM_030249309	coding	known	NC_000068.7	118779702	118795175	+	2|2 E5	214240	NO_INFO	NO_INFO	214240	NA	NO_INFO	Disp2	NA
13113	13113	Cyp3a13	34.27	38.17	40.2	48.56	51.07	55.69	37.32	46.25	53.07	63.37	63.21	69.83	1457.95	1874.8	2039	2432.15	2477	2781.13	51.7733	37.5467	65.47	45.5467	2563.43	1790.58	0.520357	0.00975676	0.000178989	Cyp3a13	IIIAm2	mRNA	4	URS00009B87A4+++XR_003955579+++NM_007819+++XM_030254121	coding	known	NC_000071.6	137892933	137925610	-	5 G2|5 76.89 cM	13113	NO_INFO	NO_INFO	13113	NA	K07424	Cyp3a13	NA
26409	26409	Map3k7	4.49	3.85	4.23	5.14	4.99	4.15	4.89	4.66	5.58	6.71	6.18	5.2	362	367	433	522	482	417	4.76	4.19	6.03	5.04333	473.667	387.333	0.275697	0.563637	0.116746	Map3k7	B430101B05+++C87327+++Tak1	mRNA	7	URS00009AF0C1+++URS00009AF8F6+++URS00009C39AC+++XR_390323+++NM_009316+++NM_172688+++XM_006537948	coding	known	NC_000070.6	31962569	32023470	+	4|4 A5	26409	NO_INFO	NO_INFO	26409	NA	K04427	NA	NA
244209	244209	Cyp2r1	5.76	4.16	5.34	5.74	7.25	6.51	6.28	5.04	7.05	7.49	8.97	8.16	94	92	115	134	148	137	6.5	5.08667	8.20667	6.12333	139.667	100.333	0.467135	0.351265	0.0392506	Cyp2r1	NA	mRNA	7	NR_110407+++NR_110408+++NM_177382+++XM_006507838+++XM_006507839+++XM_006507840+++XM_006507841	coding	known	NC_000073.6	114550123	114563048	-	7|7 F1	244209	NO_INFO	NO_INFO	244209	NA	K07419	NA	NA
74996	74996	Usp47	8.44	9.36	10.97	12.25	11.39	11.14	9.19	11.35	14.48	15.98	14.1	13.97	694	897	1088	1199	1082	1084	11.5933	9.59	14.6833	11.6733	1121.67	893	0.333201	0.282235	0.0258344	Usp47	4930502N04Rik+++A630020C16Rik	mRNA	7	URS00009B4451+++URS00009B9732+++NM_001357952+++NM_133758+++NM_177249+++XM_006508273+++XM_030243044	coding	known	NC_000073.6	112023476	112111386	+	7|7 F1	74996	NO_INFO	NO_INFO	74996	NA	NO_INFO	Usp47	NA
101351	101351	Eogt	0.98	0.93	0.76	1	0.85	0.81	1.06	1.13	1	1.31	1.05	1.01	53	65	55	62	58	51	0.886667	0.89	1.12333	1.06333	57	57.6667	-0.0265669	0.989687	0.925365	Eogt	A130022J15Rik+++AI447490+++AW214473+++AW259391+++Aer61	mRNA	5	URS00009B387D+++XR_377399+++NM_175313+++XM_006505258+++XM_011241108	coding	known	NC_000072.6	97110016	97153447	+	6|6 D3	101351	NO_INFO	NO_INFO	101351	NA	K18134	NA	NA
12869	12869	Cox8b	1.07	0.47	0	0	0.5	0.96	1.16	0.57	0	0	0.61	1.21	2	1	0	0	1	2	0.486667	0.513333	0.606667	0.576667	1	1	-0.0850232	0.999812	0.966148	Cox8b	Cox8h+++CoxVIII-H	mRNA	1	NM_007751	coding	known	NC_000073.6	140898942	140900446	-	7 F5|7 86.11 cM	12869	NO_INFO	NO_INFO	12869	NA	K02273	Cox8b	NA
194309	194309	Vps37d	0.31	0.3	0.5	0.5	0.43	0.05	0.34	0.36	0.66	0.66	0.54	0.07	5	7	12	12	8	1	0.326667	0.37	0.423333	0.453333	7	8	-0.183555	0.957046	0.825718	Vps37d	Wbscr24	mRNA	5	XR_001784645+++NM_001199677+++NM_177574+++XM_011240872+++XM_011240873	coding	known	NC_000071.6	135072899	135078326	-	5|5 G2	194309	NO_INFO	NO_INFO	194309	NA	K12185	NA	NA
21689	21689	Tekt1	0	0	0	0	0.06	0	0	0	0	0	0.07	0	0	0	0	0	1	0	0.02	0	0.0233333	0	0.333333	0	0.949827	0.952797	0.815937	Tekt1	MT14	mRNA	4	NM_001282006+++NM_001282007+++NM_011569+++XM_006532933	coding	known	NC_000077.6	72344717	72362442	-	11|11 B4	21689	NO_INFO	NO_INFO	21689	NA	NO_INFO	Tekt1	NA
64424	64424	Polr1e	1.15	1.66	1.1	1.25	0.83	0.97	1.25	2.02	1.46	1.63	1.03	1.22	59	99	68	76	49	59	1.01667	1.30333	1.29333	1.57667	61.3333	75.3333	-0.296988	0.789633	0.307773	Polr1e	53kDa+++AU042259+++D030019D19Rik+++Paf53+++Praf1	mRNA	2	NM_001285800+++NM_022811	coding	known	NC_000070.6	45018609	45034279	+	4|4 B1	64424	NO_INFO	NO_INFO	64424	NA	K03005	NA	NA
211228	211228	Lrrc25	5.65	8.35	7.6	4.63	5.27	3.58	6.15	10.12	10.03	6.04	6.53	4.5	90	154	145	87	96	67	4.49333	7.2	5.69	8.76667	83.3333	129.667	-0.62343	0.183179	0.0124811	Lrrc25	Mapa	mRNA	1	NM_153074	coding	known	NC_000074.6	70616844	70620850	+	8|8 B3.3	211228	NO_INFO	NO_INFO	211228	NA	NO_INFO	NA	NA
216516	216516	Ccdc157	2.29	2.51	2.41	4.65	2.57	3.19	2.49	3.04	3.19	6.07	3.18	4	166	216	212	404	220	268	3.47	2.40333	4.41667	2.90667	297.333	198	0.576486	0.183555	0.012533	Ccdc157	4930562D19Rik+++mKIAA1656	mRNA	8	NM_001164620+++NM_177616+++XM_006514618+++XM_011243673+++XM_011243674+++XM_011243675+++XM_011243677+++XM_030245781	coding	known	NC_000077.6	4141123	4160293	-	11|11 A1	216516	NO_INFO	NO_INFO	216516	NA	NO_INFO	Ccdc157	NA
14068	14068	F7	32.89	46.09	47.44	45.65	46.62	46.56	35.82	55.85	62.64	59.57	57.71	58.39	822	1334	1421	1348	1336	1369	46.2767	42.14	58.5567	51.4367	1351	1192.33	0.197687	0.698165	0.211333	F7	AI132620+++Cf7+++FVII	mRNA	2	XR_003947232+++NM_010172	coding	known	NC_000074.6	13025506	13035809	+	8 A1.1|8 5.73 cM	14068	NO_INFO	NO_INFO	14068	NA	K01320	NA	NA
21413	21413	Tcf4	1.17	1.24	1.09	1.06	1.06	0.96	1.28	1.5	1.43	1.39	1.32	1.21	124	160	141	143	133	125	1.02667	1.16667	1.30667	1.40333	133.667	141.667	-0.0899982	0.952797	0.659891	Tcf4	5730422P05Rik+++ASP-I2+++E2-2+++E2.2+++ITF-2+++ITF-2b+++ITF2+++ME2+++MITF-2A+++MITF-2B+++SEF-2+++SEF2+++SEF2-1+++TFE+++Tcf-4+++bHLHb19	mRNA	67	URS00009AE307+++URS00009B497E+++URS00009B560D+++URS00009B5FA3+++URS00009B837A+++URS00009B9407+++URS00009B95F7+++URS00009BA93B+++URS00009BB4A2+++URS00009BB7A9+++URS00009BBCD7+++URS00009BBEAD+++URS00009BC00B+++URS00009BC10B+++URS00009BE776+++URS00009C0D95+++URS00009C49D7+++NM_001083967+++NM_001361126+++NM_001361127+++NM_001361128+++NM_001361129+++NM_013685+++XM_006525746+++XM_006525748+++XM_0065257…	coding	known	NC_000084.6	69343429	69687967	+	18|18 E2	21413	NO_INFO	NO_INFO	21413	NA	NO_INFO	Tcf4	NA
16842	16842	Lef1	0.03	0.13	0.13	0.05	0.14	0.03	0.03	0.16	0.17	0.07	0.17	0.03	1	5	5	2	5	1	0.0733333	0.0966667	0.09	0.12	2.66667	3.66667	-0.401517	0.952797	0.728111	Lef1	3000002B05+++AI451430+++Lef-1	mRNA	15	URS0000811E75+++URS00009AFC91+++URS00009B847B+++URS00009BEB66+++URS00009C1ACC+++URS00009C545A+++NM_001276402+++NM_001276403+++NM_010703+++XM_006501068+++XM_006501069+++XM_006501070+++XM_030252440+++XM_030252441+++XM_030252442	coding	known	NC_000069.6	131109026	131224357	+	3 G3|3 60.78 cM	16842	NO_INFO	NO_INFO	16842	NA	K04492	Lef1	NA
22059	22059	Trp53	15.92	19.22	15.39	9.92	9.69	10.48	17.34	23.29	20.31	12.95	11.99	13.14	382	531	441	279	264	295	10.03	16.8433	12.6933	20.3133	279.333	451.333	-0.694813	0.00252129	2.98646e-05	Trp53	Tp53+++bbl+++bfy+++bhy+++p44+++p53	mRNA	6	NM_001127233+++NM_011640+++XM_006533157+++XM_030245922+++XM_030245923+++XM_030245924	coding	known	NC_000077.6	69580348	69591873	+	11 B3|11 42.83 cM	22059	NO_INFO	NO_INFO	22059	NA	K04451	NA	NA
108645	108645	Mat2b	11.7	14.49	14.21	13.65	15.68	16.11	12.74	17.56	18.76	17.81	19.41	20.2	298	427	435	409	455	482	15.1467	13.4667	19.14	16.3533	448.667	386.667	0.222584	0.665629	0.180803	Mat2b	1110064C04Rik+++2410018D16Rik+++AI182287+++AU022853+++MAT-II+++MATIIbeta+++TGR	mRNA	2	NM_001199274+++NM_134017	coding	known	NC_000077.6	40679314	40695203	-	11|11 A5	108645	NO_INFO	NO_INFO	108645	NA	K00789	NA	COG0192///NA+++COG1812///NA
58859	58859	Efemp2	2.02	2.69	2.39	2.17	2.68	3.31	2.19	3.26	3.15	2.83	3.32	4.15	42	65	60	54	64	83	2.72	2.36667	3.43333	2.86667	67	55.6667	0.27659	0.827028	0.35142	Efemp2	0610011K11Rik+++Fbln4+++MBP1	mRNA	10	URS00009B278E+++XR_001782605+++NM_001164352+++NM_021474+++XM_006531807+++XM_006531808+++XM_006531809+++XM_006531810+++XM_030251012+++XM_030251013	coding	known	NC_000085.6	5473959	5481854	+	19|19 A	58859	NO_INFO	NO_INFO	58859	NA	NO_INFO	Efemp2	NA
622127	622127	Cyp3a57	0.15	0.2	0.15	0.5	0.21	0.32	0.16	0.25	0.19	0.65	0.25	0.4	3	4	3	10	4	7	0.343333	0.166667	0.433333	0.2	7	3.33333	1.05641	0.718658	0.229519	Cyp3a57	EG622127	mRNA	4	NM_001100180+++XM_006504849+++XM_006504852+++XM_030254747	coding	known	NC_000071.6	145345149	145390926	+	5|5 G2	622127	NO_INFO	NO_INFO	622127	NA	NO_INFO	NA	NA
22350	22350	Ezr	1.57	3.72	2.09	2.12	1.7	2.18	1.71	4.5	2.76	2.76	2.11	2.74	69	189	110	110	86	113	2	2.46	2.53667	2.99	103	122.667	-0.223179	0.883768	0.458628	Ezr	AW146364+++R75297+++Vil2+++p81	mRNA	2	URS00009B1A3B+++NM_009510	coding	known	NC_000083.6	6738131	6782780	-	17|17 A1	22350	NO_INFO	NO_INFO	22350	NA	K08007	Ezr	NA
23806	23806	Arih1	4.94	6.08	7.34	6.98	6.7	6.52	5.38	7.37	9.69	9.11	8.29	8.17	399	570	720	675	630	642	6.73333	6.12	8.52333	7.48	649	563	0.218213	0.696561	0.20752	Arih1	AU021774+++Ari+++Ari1+++Hari+++Hhari+++Ubch7bp+++Uip77	mRNA	17	URS00009AD511+++URS00009B2C62+++URS00009B493E+++URS00009B8E37+++URS00009B9B14+++URS00009BA0D9+++URS00009BCA19+++URS00009BD1E1+++URS00009BD8DA+++URS00009BF4EE+++URS00009C02EA+++URS00009C1104+++URS00009C4961+++NM_019927+++XM_006511140+++XM_006511141+++XM_011242739	coding	known	NC_000075.6	59388553	59498736	+	9|9 B	23806	NO_INFO	NO_INFO	23806	NA	NO_INFO	Arih1	NA
108154	108154	Adamts6	0.39	0.27	0.27	0.13	0.15	0.2	0.42	0.33	0.36	0.17	0.18	0.25	34	27	29	13	13	21	0.16	0.31	0.2	0.37	15.6667	30	-0.966466	0.323559	0.0337321	Adamts6	A930019D11Rik+++ADAM-TS6+++b2b1879.1Clo+++b2b2029Clo+++b2b2182Clo+++b2b2187.1Clo+++b2b2228Clo	mRNA	12	NR_136938+++URS00009B0B78+++URS00009B0D89+++URS00009BC55A+++XR_003950407+++NM_001081020+++XM_006517516+++XM_006517517+++XM_011244611+++XM_030247120+++XM_030247121+++XM_030247122	coding	known	NC_000079.6	104286518	104496695	+	13|13 D1	108154	NO_INFO	NO_INFO	108154	NA	NO_INFO	NA	NA
73711	73711	Mvb12a	67.88	78.22	65.76	61.56	59.51	63.19	73.92	94.79	86.82	80.33	73.66	79.23	877	1166	1019	933	876	952	61.42	70.62	77.74	85.1767	920.333	1020.67	-0.153806	0.761892	0.270432	Mvb12a	1110012M11Rik+++Fam125a	mRNA	3	NM_028617+++XM_011242330+++XM_030243804	coding	known	NC_000074.6	71542907	71548026	+	8|8 B3.3	73711	NO_INFO	NO_INFO	73711	NA	K12186	Mvb12a	NA
27008	27008	Micall1	2.4	2.08	2.23	2.32	2.13	1.85	2.62	2.52	2.95	3.03	2.63	2.32	239	241	270	276	246	219	2.1	2.23667	2.66	2.69667	247	250	-0.0341274	0.968598	0.857646	Micall1	AI448246+++D15Mit260+++D15N2e+++EST573322+++EST820961+++MIRab13+++mKIAA1668	mRNA	5	XR_384014+++NM_177461+++XM_006521021+++XM_006521022+++XM_006521024	coding	known	NC_000081.6	79108550	79136900	+	15 E1|15 37.7 cM	27008	NO_INFO	NO_INFO	27008	NA	NO_INFO	NA	NA
381236	381236	Lipo3	0.94	0.93	1.01	0.79	1.04	0.92	1.02	1.13	1.33	1.03	1.28	1.15	34	40	48.88	37.82	48	41	0.916667	0.96	1.15333	1.16	42.2733	40.96	0.0476252	0.97698	0.884523	Lipo3	AI747699+++Lipo1	mRNA	8	URS00009B3BBC+++URS00009B3CE3+++NM_001013770+++XM_006527163+++XM_006527164+++XM_017318244+++XM_030250981+++XM_030250982	coding	known	NC_000085.6	33555160	33590999	+	19|19 C1	381236	NO_INFO	NO_INFO	381236	NA	NO_INFO	NA	NA
327762	327762	Dna2	1.66	1.75	1.18	1.98	1.2	1.41	1.81	2.12	1.55	2.58	1.48	1.76	100	122	85	141	83	100	1.53	1.53	1.94	1.82667	108	102.333	0.054889	0.96299	0.842246	Dna2	Dna2l+++E130315B21Rik	mRNA	3	NR_152862+++XR_380405+++NM_177372	coding	known	NC_000076.6	62946983	62974188	+	10|10 B4	327762	NO_INFO	NO_INFO	327762	NA	K10742	NA	NA
67471	67471	Gpatch1	3.69	3.77	3.84	3.68	3.16	3.15	4.02	4.56	5.07	4.8	3.91	3.95	165.99	192	204.1	193	164.36	164	3.33	3.76667	4.22	4.55	173.787	187.363	-0.114945	0.927692	0.543037	Gpatch1	1300003A17Rik+++ECGP+++Gpatc1	mRNA	5	URS00009AFEDD+++NM_026181+++XM_030242933+++XM_030242934+++XM_030242935	coding	known	NC_000073.6	35235016	35318748	-	7|7 B2	67471	NO_INFO	NO_INFO	67471	NA	NO_INFO	Gpatch1	NA
13388	13388	Dll1	1.03	0.76	0.9	0.52	0.4	0.37	1.12	0.92	1.19	0.68	0.5	0.47	52	45	55	31	23	22	0.43	0.896667	0.55	1.07667	25.3333	50.6667	-1.02363	0.0890876	0.00412151	Dll1	Delta1	mRNA	7	URS00009B3813+++URS00009B3FCF+++URS00009B5F34+++URS00009B6361+++NM_007865+++XM_011246267+++XM_030249466	coding	known	NC_000083.6	15367354	15379475	+	17 A2|17 8.95 cM	13388	NO_INFO	NO_INFO	13388	NA	K06051	Dll1	NA
68799	68799	Rgmb	0.63	0.65	0.78	0.73	0.6	0.59	0.68	0.79	1.03	0.96	0.74	0.74	33	39	46	41	33	38	0.64	0.686667	0.813333	0.833333	37.3333	39.3333	-0.0789717	0.952797	0.811431	Rgmb	1110059F19Rik+++DRAGON	mRNA	7	URS00009B8324+++URS00009BB9F4+++URS00009C557F+++NM_178615+++XM_006524863+++XM_006524864+++XM_006524865	coding	known	NC_000083.6	15803188	15831347	+	17|17 A2	68799	NO_INFO	NO_INFO	68799	NA	K06847	NA	NA
234797	234797	6430548M08Rik	1.23	1.43	1.39	1.04	1.21	0.9	1.34	1.73	1.83	1.35	1.5	1.12	96	136	137	101	102	87	1.05	1.35	1.32333	1.63333	96.6667	123	-0.343635	0.573096	0.121301	6430548M08Rik	AW049007+++Kiaa0513+++mKIAA0513	mRNA	5	NM_001163760+++NM_001163761+++NM_001163762+++NM_172286+++XM_006530934	coding	known	NC_000074.6	120114152	120165307	+	8|8 E1	234797	NO_INFO	NO_INFO	234797	NA	NO_INFO	6430548M08Rik	NA
215772	215772	Adgb	0.56	0.66	0.67	0.39	0.24	0.17	0.61	0.8	0.89	0.51	0.3	0.22	36	54	54	34	19	16	0.266667	0.63	0.343333	0.766667	23	48	-1.06107	0.112334	0.00575753	Adgb	9130014G24Rik	mRNA	11	NM_001127353+++XM_006512658+++XM_006512663+++XM_011243160+++XM_011243163+++XM_017313875+++XM_017313876+++XM_017313877+++XM_017313878+++XM_017313879+++XM_030244999	coding	known	NC_000076.6	10335703	10475093	-	10|10 A1	215772	NO_INFO	NO_INFO	215772	NA	NO_INFO	Adgb	NA
56488	56488	Nxt1	12.64	10.74	8.9	8.07	10.09	8.95	13.77	13.02	11.75	10.54	12.49	11.22	144	139	122	107	131	118	9.03667	10.76	11.4167	12.8467	118.667	135	-0.20975	0.852014	0.392059	Nxt1	1110001N02Rik	mRNA	2	NM_001110159+++NM_019761	coding	known	NC_000068.7	148672615	148676026	+	2|2 G3	56488	NO_INFO	NO_INFO	56488	NA	K14285	Nxt1	NA
72948	72948	Tppp	0.62	1.55	1.59	1.29	1.21	1.99	0.68	1.87	2.1	1.68	1.5	2.5	47	135	144	115	105	177	1.49667	1.25333	1.89333	1.55	132.333	108.667	0.331779	0.801981	0.32304	Tppp	2900041A09Rik+++AI849835+++TPPP/p25	mRNA	3	URS00009BD64A+++NM_182839+++XM_006517409	coding	known	NC_000079.6	74009419	74035753	+	13|13 C1	72948	NO_INFO	NO_INFO	72948	NA	NO_INFO	Tppp	NA
217980	217980	Larp4b	10.04	8.5	9.74	8.14	7.94	7.32	10.93	10.3	12.86	10.62	9.82	9.18	890	897	1061	879	815	769	7.8	9.42667	9.87333	11.3633	821	949.333	-0.22496	0.630771	0.154632	Larp4b	A630096F19+++AI256361+++D13Wsu64e+++Larp5	mRNA	12	URS00009B0B86+++URS00009B3D0C+++URS00009B9D8F+++URS00009BB30F+++URS00009BCE4E+++URS00009C0A51+++NM_001311117+++NM_172585+++XM_006516476+++XM_006516477+++XM_011244253+++XM_011244254	coding	known	NC_000079.6	9093653	9174451	+	13 A1|13 3.66 cM	217980	NO_INFO	NO_INFO	217980	NA	NO_INFO	NA	NA
67425	67425	Eps8l1	0.6	0.99	0.45	0.49	0.22	0.19	0.66	1.2	0.59	0.64	0.27	0.23	33	67	33	34	15	12	0.3	0.68	0.38	0.816667	20.3333	44.3333	-1.12624	0.214054	0.0163145	Eps8l1	2310051G19Rik+++4632407K17Rik+++AW060268+++DRC3+++EPS8R1	mRNA	14	URS0000811FD6+++URS00009B7C3E+++URS00009BD77D+++XR_003946548+++XR_003946549+++XR_391095+++XR_391096+++NM_001290416+++NM_026146+++XM_006540323+++XM_006540324+++XM_006540325+++XM_006540326+++XM_017312258	coding	known	NC_000073.6	4388658	4591114	+	7|7 A1	67425	NO_INFO	NO_INFO	67425	NA	NO_INFO	NA	NA
224630	224630	Bnip1	17.36	18.65	14.94	13.69	15.75	13.26	18.91	22.6	19.73	17.86	19.5	16.63	226	281	233	210	234	202	14.2333	16.9833	17.9967	20.4133	215.333	246.667	-0.204883	0.770986	0.284524	Bnip1	2010005M06Rik+++5930429G21Rik+++Sec20	mRNA	3	URS00009C1D88+++NM_172149+++XM_030249681	coding	known	NC_000083.6	26781069	26792521	+	17|17 A3.3	224630	NO_INFO	NO_INFO	224630	NA	K08497	NA	NA
12982	12982	Csf2ra	4.23	6.6	3.7	2.93	2.95	2.47	4.6	8	4.88	3.83	3.66	3.09	114	200.27	119	94	91	76	2.78333	4.84333	3.52667	5.82667	87	144.423	-0.726765	0.108673	0.00544318	Csf2ra	CD116+++Csfgmra+++GM-CSF-Ra+++GM-CSFR	mRNA	17	XR_003952743+++XR_003952744+++XR_003952745+++XR_003952746+++XR_003952747+++XR_003952748+++XR_003952749+++XR_877658+++XR_877659+++NM_009970+++XM_011247130+++XM_011247131+++XM_011247132+++XM_011247134+++XM_017318052+++XM_030250735+++XM_030250736	coding	known	NC_000085.6	61217191	61228461	-	19 D3|19 56.89 cM	12982	NO_INFO	NO_INFO	12982	NA	K05066	Csf2ra	NA
66603	66603	Gemin2	4.98	6.42	5.92	7.87	7.66	6.03	5.43	7.77	7.82	10.28	9.48	7.57	104	155	148	194	183	148	7.18667	5.77333	9.11	7.00667	175	135.667	0.37166	0.472015	0.0741861	Gemin2	Sip1+++gemin-2	mRNA	1	NM_025656	coding	known	NC_000078.6	59013391	59028470	+	12|12 C1	66603	NO_INFO	NO_INFO	66603	NA	NO_INFO	NA	NA
14733	14733	Gpc1	1.63	3.83	3.16	6.48	5.6	7.89	1.77	4.65	4.17	8.46	6.93	9.89	80	218	198	391	332	464	6.65667	2.87333	8.42667	3.53	395.667	165.333	1.29854	0.000161967	1.15511e-06	Gpc1	AI462976	mRNA	3	NM_016696+++XM_006529142+++XM_011247925	coding	known	NC_000067.6	92831645	92860211	+	1|1 D	14733	NO_INFO	NO_INFO	14733	NA	K08107	Gpc1	NA
56045	56045	Samhd1	3.36	6.8	5.88	3.76	3.79	3.83	3.66	8.24	7.76	4.91	4.69	4.8	187	441	389	247	242	254	3.79333	5.34667	4.8	6.55333	247.667	339	-0.418815	0.460631	0.0715013	Samhd1	E330031J07Rik+++Mg11+++mSAMHD1	mRNA	3	NM_001139520+++NM_001370610+++NM_018851	coding	known	NC_000068.7	157097534	157135096	-	2|2 H1	56045	NO_INFO	NO_INFO	56045	NA	K22544	Samhd1	NA
100041194	100041194	Ahnak2	0.03	0.09	0.05	0.02	0.01	0.04	0.03	0.11	0.07	0.03	0.01	0.06	5	18	11	4	2	9	0.0233333	0.0566667	0.0333333	0.07	5	11.3333	-1.14167	0.62201	0.148511	Ahnak2	AI450948+++Gm1185+++Gm72	mRNA	4	XM_030247046+++XM_030251791+++XM_030251792+++XM_030251793	coding	known	NW_019168521.1	70892	112802701	-	12|12 F1	100041194	NO_INFO	NO_INFO	100041194	NA	K23934	Ahnak2	NA
21817	21817	Tgm2	23.65	42.95	33.38	38.89	24.99	22.98	25.76	52.04	44.07	50.75	30.93	28.82	1214	2556	2056	2365	1476	1392	28.9533	33.3267	36.8333	40.6233	1744.33	1942	-0.13604	0.937129	0.560301	Tgm2	G[a]h+++TG2+++TGase2+++tTG+++tTGas	mRNA	2	URS00009B3DEB+++NM_009373	coding	known	NC_000068.7	158116405	158146392	+	2 H1|2 78.72 cM	21817	NO_INFO	NO_INFO	21817	NA	K05625	Tgm2	NA
170789	170789	Acot8	20.25	19.12	20.92	26.15	22.55	19.73	22.05	23.17	27.62	34.13	27.91	24.74	287	312	352	437	364	329	22.81	20.0967	28.9267	24.28	376.667	317	0.236473	0.670661	0.184916	Acot8	PTE-1+++PTE-2+++Pte1	mRNA	10	URS00009B28BE+++URS00009B5448+++XR_001781109+++NM_001362756+++NM_001362757+++NM_133240+++XM_006498829+++XM_006498831+++XM_011239318+++XM_011239319	coding	known	NC_000068.7	164792768	164821134	+	2|2 H3	170789	NO_INFO	NO_INFO	170789	NA	K11992	NA	NA
20318	20318	Sdf4	22.76	52.6	57.94	54.03	57.3	48.92	24.79	63.75	76.49	70.51	70.92	61.35	1126	1934	1931	1946	1900	1702	53.4167	44.4333	67.5933	55.01	1849.33	1663.67	0.171408	0.778537	0.292971	Sdf4	Cab45	mRNA	7	URS00009B6B84+++URS00009C4180+++URS00009C4DA3+++NM_001302467+++NM_001302468+++NM_001302469+++NM_011341	coding	known	NC_000070.6	155992843	156013614	+	4|4 E2	20318	NO_INFO	NO_INFO	20318	NA	NO_INFO	Sdf4	NA
17776	17776	Mast2	5.99	5.98	4.38	5.18	4.59	4.17	6.53	7.24	5.79	6.76	5.69	5.23	314	374	316	358	304	274	4.64667	5.45	5.89333	6.52	312	334.667	-0.116826	0.921074	0.527939	Mast2	MAST205+++Mtssk	mRNA	16	URS00009B867A+++URS00009B8969+++URS00009BB4C4+++URS00009BD471+++URS00009BE4FA+++URS00009C119A+++NM_001042743+++NM_001369061+++NM_001369062+++NM_008641+++XM_006502834+++XM_006502835+++XM_006502836+++XM_006502839+++XM_017320018+++XM_030253297	coding	known	NC_000070.6	116306760	116464223	+	4|4 D1	17776	NO_INFO	NO_INFO	17776	NA	NO_INFO	NA	NA
107589	107589	Mylk	13.36	9.47	10.43	7.97	8.97	8.91	14.55	11.48	13.77	10.4	11.11	11.17	1071	1061	1373	909	995	955	8.61667	11.0867	10.8933	13.2667	953	1168.33	-0.304394	0.452135	0.0684401	Mylk	9530072E15Rik+++A930019C19Rik+++AW489456+++KRP+++MLCK108+++MLCK210+++Mlck+++nmMlck+++smMLCK	mRNA	8	URS00009B17DB+++URS00009B2B86+++URS00009B9544+++NM_139300+++XM_006521702+++XM_006521703+++XM_006521705+++XM_017316849	coding	known	NC_000082.6	34745199	35002436	+	16|16 B3	107589	NO_INFO	NO_INFO	107589	NA	K00907	Mylk	NA
667103	667103	Gm13570	0.18	0	0	0	0.16	0	0.2	0	0	0	0.2	0	1	0	0	0	1	0	0.0533333	0.06	0.0666667	0.0666667	0.333333	0.333333	-0.0119426	0.999812	0.997249	Gm13570	NA	mRNA	1	NM_001370942	coding	known	NC_000068.7	60098135	60098735	-	2|2 C1.1	667103	NO_INFO	NO_INFO	667103	NA	K22138	NA	NA
106861	106861	Abhd3	24.91	23.07	26.78	25.58	21.32	21.86	27.12	27.95	35.35	33.38	26.39	27.41	608	616	727	701	567	599	22.92	24.92	29.06	30.14	622.333	650.333	-0.0799911	0.952797	0.629467	Abhd3	AA675331+++LABH3	mRNA	4	XR_385966+++NM_134130+++XM_011246793+++XM_011246794	coding	known	NC_000084.6	10644411	10706783	-	18|18 A1	106861	NO_INFO	NO_INFO	106861	NA	NO_INFO	Abhd3	NA
329910	329910	Acot11	0.37	0.91	1.14	0.33	0.5	0.5	0.4	1.1	1.5	0.43	0.62	0.63	31	89	115	33	48	50	0.443333	0.806667	0.56	1	43.6667	78.3333	-0.788251	0.370996	0.0441697	Acot11	1110020M10Rik+++2010309H15Rik+++AW060409+++BFIT+++BFIT1+++Thea+++Them1+++mKIAA0707	mRNA	4	URS00009B8B69+++NM_001347159+++NM_025590+++XM_011240556	coding	known	NC_000070.6	106744555	106805007	+	4|4 C7	329910	NO_INFO	NO_INFO	329910	NA	NO_INFO	Acot11	NA
320191	320191	Hook3	2.09	1.83	2.42	2.56	2.63	2.27	2.27	2.21	3.19	3.34	3.25	2.85	403	415	569	588	577	521	2.48667	2.11333	3.14667	2.55667	562	462.333	0.275179	0.570013	0.119871	Hook3	5830454D03Rik+++AI317159+++E330005F07Rik	mRNA	15	URS00009AED23+++URS00009B35D4+++URS00009B4B94+++URS00009B7110+++URS00009B8B9C+++URS00009B938E+++URS00009B9F08+++URS00009BDF30+++URS00009C32B8+++URS0000AAED50+++NM_207659+++XM_006509148+++XM_006509149+++XM_006509150+++XM_006509151	coding	known	NC_000074.6	26021421	26119618	+	8|8 A2	320191	NO_INFO	NO_INFO	320191	NA	NO_INFO	Hook3	NA
18476	18476	Pafah1b3	4.26	6.08	4.25	5.21	4.68	4.74	4.64	7.36	5.61	6.81	5.8	5.95	42	72	52	60	56	56	4.87667	4.86333	6.18667	5.87	57.3333	55.3333	0.0565265	0.964203	0.846019	Pafah1b3	Pafahg+++mus[g]	mRNA	3	NM_001357350+++NM_008776+++XM_017322027	coding	known	NC_000073.6	25295048	25297986	-	7|7 A3	18476	NO_INFO	NO_INFO	18476	NA	K16795	Pafah1b3	NA
22156	22156	Tuft1	1.43	2.21	1.27	1.22	1.1	1.75	1.55	2.68	1.68	1.6	1.36	2.19	53	94	56	53	47	76	1.35667	1.63667	1.71667	1.97	58.6667	67.6667	-0.200848	0.92331	0.533405	Tuft1	NA	mRNA	3	NM_001293728+++NM_011656+++XM_006501307	coding	known	NC_000069.6	94612753	94658872	-	3|3 F2.1	22156	NO_INFO	NO_INFO	22156	NA	NO_INFO	NA	NA
54604	54604	Pcnx	2.11	2.27	2.46	3	2.64	2.21	2.3	2.75	3.25	3.91	3.27	2.77	290	385	488	534	465	394	2.61667	2.28	3.31667	2.76667	464.333	387.667	0.266618	0.634046	0.156339	Pcnx	2900024E21Rik+++3526401J03Rik+++AF096286+++AI327143+++AI413187+++Pcnx1+++Pcnxl1	mRNA	15	URS00009AEBFE+++URS00009B090E+++URS00009B0A63+++URS00009C551D+++URS0000BCF5B4+++NM_018814+++XM_006516089+++XM_006516090+++XM_006516091+++XM_006516092+++XM_006516093+++XM_006516094+++XM_006516095+++XM_017315138+++XM_030246823	coding	known	NC_000078.6	81859913	82000924	+	12|12 D1	54604	NO_INFO	NO_INFO	54604	NA	NO_INFO	Pcnx	NA
23985	23985	Slc26a4	0.05	0.07	0.06	0.06	0.07	0.06	0.05	0.09	0.08	0.08	0.08	0.08	2	3	3	3	3	3	0.0633333	0.06	0.08	0.0733333	3	2.66667	0.175046	0.973937	0.873916	Slc26a4	Pds+++pendrin	mRNA	6	XR_003950047+++NM_011867+++XM_006515091+++XM_006515092+++XM_011243870+++XM_017315068	coding	known	NC_000078.6	31519814	31560055	-	12|12 A2	23985	NO_INFO	NO_INFO	23985	NA	K14702	Slc26a4	NA
54644	54644	Otud5	8.94	9.13	8.54	9.22	8.23	8.16	9.73	11.07	11.28	12.03	10.19	10.23	553	664	658	704	584	613	8.53667	8.87	10.8167	10.6933	633.667	625	0.0102746	0.997577	0.944311	Otud5	AA407879+++AI553596+++BB114028+++DUBA+++DXImx46e+++Sfc7	mRNA	8	NM_001290536+++NM_001290537+++NM_138604+++XM_006527665+++XM_006527666+++XM_017318564+++XM_030251397+++XM_030251398	coding	known	NC_000086.7	7839613	7876626	+	X A1.1|X 3.54 cM	54644	NO_INFO	NO_INFO	54644	NA	K12655	Otud5	NA
21930	21930	Tnfaip6	0.1	0	0.08	0.08	0	0.16	0.1	0	0.1	0.11	0	0.2	2	0	2	2	0	4	0.08	0.06	0.103333	0.0666667	2	1.33333	0.52082	0.952797	0.754962	Tnfaip6	TSG-6+++Tnfip6+++Tsg6	mRNA	2	URS00009B68B7+++NM_009398	coding	known	NC_000068.7	52038113	52056681	+	2|2 C1.1	21930	NO_INFO	NO_INFO	21930	NA	NO_INFO	Tnfaip6	NA
240283	240283	Dmxl1	1.07	0.77	1.04	1.04	1.1	0.93	1.16	0.94	1.37	1.36	1.37	1.17	198	164	226	224	232	202	1.02333	0.96	1.3	1.15667	219.333	196	0.141276	0.918088	0.520166	Dmxl1	C630007L23Rik+++D030030C22	mRNA	11	URS00009AD8DF+++URS00009ADFF7+++URS00009AECC2+++URS00009B2BB4+++URS00009B7104+++URS00009C44A9+++NM_001081371+++XM_006525916+++XM_006525917+++XM_006525918+++XM_030250455	coding	known	NC_000084.6	49832590	49965554	+	18|18 D1	240283	NO_INFO	NO_INFO	240283	NA	K24155	NA	NA
14373	14373	G0s2	983.46	562.46	468.75	1110.56	830.4	881.53	1071.06	681.59	618.84	1449.27	1027.83	1105.43	9099	6008	5178	12045	8711	9500	940.83	671.557	1194.18	790.497	10085.3	6761.67	0.5042	0.445552	0.0657898	G0s2	AI255151+++AV006465	mRNA	1	NM_008059	coding	known	NC_000067.6	193272160	193273188	-	1 H6|1 97.69 cM	14373	NO_INFO	NO_INFO	14373	NA	NO_INFO	G0s2	NA
271944	271944	C2cd4d	1.75	2.55	1.81	1.74	2.27	2	1.9	3.09	2.39	2.27	2.8	2.51	29	49	36	34	43	39	2.00333	2.03667	2.52667	2.46	38.6667	38	0.0330259	0.989091	0.923363	C2cd4d	Gm659	mRNA	1	NM_001136117	coding	known	NC_000069.6	94362444	94364567	+	3|3 F2.1	271944	NO_INFO	NO_INFO	271944	NA	NO_INFO	NA	NA
107733	107733	Mrpl41	19.57	15.28	12.28	12.22	14.26	13.27	21.32	18.52	16.21	15.95	17.65	16.64	662	599	498	489	554	529	13.25	15.71	16.7467	18.6833	524	586.333	-0.198058	0.837811	0.364844	Mrpl41	MRP-L27+++Rpml27	mRNA	1	NM_001031808	coding	known	NC_000068.7	24972470	24975098	-	2|2 A3	107733	NO_INFO	NO_INFO	107733	NA	NO_INFO	NA	NA
75079	75079	Zbtb49	0.93	0.53	0.63	0.5	0.53	0.38	1.01	0.64	0.83	0.65	0.66	0.47	24	26	28	20	23	19	0.47	0.696667	0.593333	0.826667	20.6667	26	-0.339158	0.861978	0.410817	Zbtb49	4930518A03Rik+++Zfp509+++Znf509	mRNA	9	NR_153116+++URS0000B12C80+++NM_001359466+++NM_029162+++XM_006504163+++XM_006504168+++XM_011240780+++XM_030254864+++XM_030254865	coding	known	NC_000071.6	38189732	38220499	-	5|5 B3	75079	NO_INFO	NO_INFO	75079	NA	NO_INFO	NA	NA
18679	18679	Phka1	2.27	1.82	1.75	1.82	1.86	2.09	2.47	2.2	2.31	2.38	2.3	2.62	319.29	288.68	296.69	307.15	307.8	355.61	1.92333	1.94667	2.43333	2.32667	323.52	301.553	0.0749196	0.952797	0.713167	Phka1	5330411D17+++9830108K24Rik+++Phka	mRNA	8	URS00009ADF67+++URS00009C06ED+++URS00009C073F+++NM_008832+++NM_173021+++XM_006527894+++XM_006527895+++XM_017318427	coding	known	NC_000086.7	102513975	102644301	-	X D|X 45.47 cM	18679	NO_INFO	NO_INFO	18679	NA	K07190	Phka1	NA
228961	228961	Npepl1	28.22	36.79	33.18	33.67	31.36	32.31	30.74	44.58	43.81	43.94	38.82	40.52	812	1226	1144	1145	1035	1094	32.4467	32.73	41.0933	39.71	1091.33	1060.67	0.047436	0.952797	0.730148	Npepl1	BC023239+++C85514+++mKIAA1974	mRNA	4	XR_374462+++XR_374463+++NM_213733+++XM_006499443	coding	known	NC_000068.7	174110336	174122702	+	2|2 H4	228961	NO_INFO	NO_INFO	228961	NA	NO_INFO	Npepl1	NA
210998	210998	Fam91a1	6.54	8.11	9.73	9.58	9.6	9.35	7.12	9.83	12.85	12.5	11.88	11.73	538	785	975	948	917	914	9.51	8.12667	12.0367	9.93333	926.333	766	0.28895	0.508264	0.087122	Fam91a1	AV220772+++BC033609+++D15Ertd621e+++SKIN+++mKIAA0493	mRNA	5	NM_145959+++XM_006520704+++XM_006520705+++XM_006520706+++rna-NM_145959.3-2	coding	known	NW_019168525.1	440389	58457801	+	15 D1|15 24.76 cM	210998	NO_INFO	NO_INFO	210998	NA	NO_INFO	NA	NA
217826	217826	Kcnk13	0.25	0.35	0.19	0.15	0.26	0.06	0.27	0.43	0.25	0.2	0.32	0.07	11	18	10	9	13	3	0.156667	0.263333	0.196667	0.316667	8.33333	13	-0.641231	0.815673	0.338474	Kcnk13	BB085247+++F730021E22Rik+++Gm1570+++Gm1685	mRNA	4	NM_001164426+++NM_001164427+++NM_146037+++XM_030246665	coding	known	NC_000078.6	99963149	100062682	+	12|12 E	217826	NO_INFO	NO_INFO	217826	NA	NO_INFO	Kcnk13	NA
23886	23886	Gdf15	3.24	8.05	5.75	22.53	6.55	6.02	3.52	9.76	7.59	29.41	8.11	7.54	57	164	121	478	134	127	11.7	5.68	15.02	6.95667	246.333	114	1.13236	0.526636	0.0960845	Gdf15	MIC-1+++NAG-1+++SBF	mRNA	3	NM_001330687+++NM_011819+++XM_011242304	coding	known	NC_000074.6	70629393	70632470	-	8|8 B3.3	23886	NO_INFO	NO_INFO	23886	NA	K05504	NA	NA
71881	71881	Apmap	7.95	9.31	9.74	9.66	10.41	8.84	8.66	11.28	12.86	12.61	12.88	11.09	242	333	361	353	369	322	9.63667	9	12.1933	10.9333	348	312	0.163167	0.807727	0.331392	Apmap	2310001A20Rik+++AI314817	mRNA	8	URS00009B4D75+++URS00009B9467+++URS00009C0AE6+++NM_001356491+++NM_001356492+++NM_027977+++XM_006500198+++XM_006500200	coding	known	NC_000068.7	150583080	150610255	+	2|2 G3	71881	NO_INFO	NO_INFO	71881	NA	NO_INFO	NA	NA
13138	13138	Dag1	5.37	9.22	14.08	16.96	14.31	14.44	5.84	11.17	18.59	22.13	17.71	18.11	436	863	1371	1632	1328	1375	15.2367	9.55667	19.3167	11.8667	1445	890	0.740007	0.112435	0.00578238	Dag1	D9Wsu13e+++DG+++Dp427+++Dp71	mRNA	12	URS00009BC280+++URS00009BE9DC+++NM_001276481+++NM_001276482+++NM_001276485+++NM_001276486+++NM_001276492+++NM_001276493+++NM_010017+++XM_006511636+++XM_030244040+++XM_030244041	coding	known	NC_000075.6	108204861	108263977	+	9 F1- F2|9 59.08 cM	13138	NO_INFO	NO_INFO	13138	NA	K06265	Dag1	NA
215160	215160	Rhbdd2	4.92	6.22	7.76	6.73	6.58	6.46	5.35	7.53	10.24	8.78	8.14	8.1	252	376	445	404	392	394	6.59	6.3	8.34	7.70667	396.667	357.667	0.162778	0.831233	0.356721	Rhbdd2	0610011L13Rik+++AI480532+++Rhbdl7+++Usmg1	mRNA	5	URS00009B41A8+++URS00009B459E+++NM_001357037+++NM_146002+++XM_030254359	coding	known	NC_000071.6	135632654	135656045	+	5|5 G2	215160	NO_INFO	NO_INFO	215160	NA	NO_INFO	NA	NA
68566	68566	Caly	0.09	0.08	0.05	0.15	0.15	0.07	0.1	0.09	0.07	0.19	0.19	0.09	1	1	1	2	2	1	0.123333	0.0733333	0.156667	0.0866667	1.66667	1	0.723515	0.952797	0.651863	Caly	0710001P07Rik+++1110004A22Rik+++Calcyon+++Drd1ip	mRNA	8	URS00009BDCF1+++NM_001190385+++NM_001190386+++NM_026769+++XM_006536235+++XM_006536236+++XM_006536237+++XM_011249853	coding	known	NC_000073.6	140069880	140082571	-	7|7 F4	68566	NO_INFO	NO_INFO	68566	NA	K15493	NA	NA
27096	27096	Trappc3	26.16	25.92	21.43	22.52	23.68	23.89	28.49	31.41	28.29	29.39	29.31	29.96	410	470	402	416	424	439	23.3633	24.5033	29.5533	29.3967	426.333	427.333	-0.0184861	0.986048	0.91447	Trappc3	1110058K12Rik+++AI835942+++AU019197+++Bet3	mRNA	2	URS00009ADBB5+++NM_013718	coding	known	NC_000070.6	126262405	126275883	+	4|4 D2.2	27096	NO_INFO	NO_INFO	27096	NA	NO_INFO	NA	NA
20379	20379	Sfrp4	0.04	0.04	0	0.04	0	0	0.05	0.04	0	0.05	0	0	1	1	0	1	0	0	0.0133333	0.0266667	0.0166667	0.03	0.333333	0.666667	-0.957773	0.952797	0.731372	Sfrp4	NA	mRNA	1	NM_016687	coding	known	NC_000079.6	19623175	19632825	+	13 A2|13 6.99 cM	20379	NO_INFO	NO_INFO	20379	NA	K02185	Sfrp4	NA
67231	67231	Tbc1d20	9.41	8.99	9.81	11.41	11.07	10.65	10.25	10.89	12.95	14.89	13.7	13.36	459	508	574	659	621	613	11.0433	9.40333	13.9833	11.3633	631	513.667	0.287869	0.409079	0.0548483	Tbc1d20	1110028I04Rik+++2810442O16Rik+++AI414693+++bs	mRNA	4	NR_156111+++URS00009B18E1+++XR_001783169+++NM_024196	coding	known	NC_000068.7	152293826	152313994	+	2|2 G3	67231	NO_INFO	NO_INFO	67231	NA	NO_INFO	NA	COG5210///NA
21934	21934	Tnfrsf11a	0.16	0.15	0.15	0.09	0.18	0.06	0.18	0.18	0.2	0.12	0.22	0.07	14	15	16	8	16	6	0.11	0.153333	0.136667	0.186667	10	15	-0.589639	0.798665	0.319858	Tnfrsf11a	Ly109+++ODFR+++OFE+++Rank+++TRANCE-R+++mRANK	mRNA	3	URS00009B970D+++NM_009399+++XM_006529381	coding	known	NC_000067.6	105780673	105849444	+	1|1 E2.1	21934	NO_INFO	NO_INFO	21934	NA	K05147	Tnfrsf11a	NA
11932	11932	Atp1b2	0.05	0.2	0.12	0.08	0.1	0.18	0.05	0.25	0.16	0.1	0.13	0.23	2	10	6	4	5	9	0.12	0.123333	0.153333	0.153333	6	6	0.047076	0.999812	0.955669	Atp1b2	Amog+++Atpb-2	mRNA	3	URS00009C403C+++NM_013415+++XM_017314232	coding	known	NC_000077.6	69596827	69605978	-	11 B3|11 42.86 cM	11932	NO_INFO	NO_INFO	11932	NA	K01540	Atp1b2	NA
78655	78655	Eif3j1	24.2	28.29	21.71	24.31	27.14	23.03	26.35	34.28	28.66	31.73	33.59	28.88	814.63	1103.52	876.59	968.44	1049.56	913.65	24.8267	24.7333	31.4	29.7633	977.217	931.58	0.064179	0.952797	0.688055	Eif3j1	1810016I04Rik+++2700079K05Rik+++AA409117+++AA409446+++C78575+++Eif3j+++Eif3j-1+++Eif3j-2+++Eif3j2+++Eif3s1+++eIF-3-alpha-A+++eIF-3-alpha-B+++eIF3-alpha+++eIF3-p35+++eIF3j-A+++eIF3j-B	mRNA	3	URS00009B8BAB+++URS00009BFDB2+++NM_144545	coding	known	NC_000068.7	122028580	122053632	+	2|2 E5	78655	NO_INFO	NO_INFO	78655	NA	NO_INFO	NA	NA
227526	227526	Cdnf	0.19	0.16	0.08	0.18	0.08	0.06	0.2	0.19	0.1	0.23	0.1	0.07	8	8	4	9	4	3	0.106667	0.143333	0.133333	0.163333	5.33333	6.66667	-0.365399	0.952797	0.660788	Cdnf	9330140G23+++Armetl1	mRNA	1	NM_177647	coding	known	NC_000068.7	3513065	3526376	+	2|2 A1	227526	NO_INFO	NO_INFO	227526	NA	NO_INFO	NA	NA
667370	667370	Ifit3b	1.27	2.1	1.54	1.02	1.48	1.11	1.39	2.55	2.03	1.33	1.83	1.4	34.97	66.89	51.53	33.01	46.6	36	1.20333	1.63667	1.52	1.99	38.5367	51.13	-0.375084	0.757293	0.266434	Ifit3b	I830012O16Rik	mRNA	2	NM_001005858+++XM_006527264	coding	known	NC_000085.6	34607530	34613403	+	19|19 C1	667370	NO_INFO	NO_INFO	667370	NA	NO_INFO	NA	NA
67949	67949	Nifk	11.68	18.38	14.99	14.97	11.82	12.85	12.72	22.28	19.79	19.54	14.63	16.11	299	545	460	453	347	387	13.2133	15.0167	16.76	18.2633	395.667	434.667	-0.122253	0.91495	0.51481	Nifk	AI852665+++C130020J04Rik+++Mki67ip	mRNA	1	NM_026472	coding	known	NC_000067.6	118321843	118333831	+	1|1 E2.3	67949	NO_INFO	NO_INFO	67949	NA	NO_INFO	NA	COG0724///NA
107146	107146	Glyat	253.3	221.62	230.5	309.06	329.85	308.19	275.86	268.56	304.3	403.32	408.27	386.47	4183	4235	4557	6017	6225	5970	315.7	235.14	399.353	282.907	6070.67	4325	0.471134	0.0454099	0.00152634	Glyat	A330009E03Rik+++ACGNAT+++AI195249+++AI315345+++CAT+++GAT	mRNA	1	NM_145935	coding	known	NC_000085.6	12633308	12651737	+	19|19 A	107146	NO_INFO	NO_INFO	107146	NA	K00628	Glyat	NA
26447	26447	Poli	3.39	2.85	2.65	2.64	2.27	2.35	3.7	3.45	3.5	3.45	2.81	2.95	124	123	121	115	98	99	2.42	2.96333	3.07	3.55	104	122.667	-0.259295	0.752742	0.262359	Poli	Rad30b	mRNA	17	URS00009B9646+++URS00009C3498+++URS00009C575E+++XR_001782369+++NM_001136090+++NM_001289515+++NM_001289516+++NM_011972+++XM_006525945+++XM_006525946+++XM_011246933+++XM_011246934+++XM_017317910+++XM_017317911+++XM_030250465+++XM_030250466+++XM_030250467	coding	known	NC_000084.6	70508680	70534956	+	18 44.48 cM|18 E2	26447	NO_INFO	NO_INFO	26447	NA	K03510	NA	NA
20296	20296	Ccl2	0.69	0.7	1.16	0.2	0.81	0	0.75	0.85	1.53	0.26	1.01	0	6	7	12	2	8	0	0.336667	0.85	0.423333	1.04333	3.33333	8.33333	-1.29911	0.674632	0.189232	Ccl2	AI323594+++HC11+++JE+++MCAF+++MCP-1+++MCP1+++SMC-CF+++Scya2+++Sigje	mRNA	1	NM_011333	coding	known	NC_000077.6	82035577	82037452	+	11 B5|11 49.82 cM	20296	NO_INFO	NO_INFO	20296	NA	K14624	Ccl2	NA
382265	382265	Cldn34c3	0	0	0	0	0.18	0	0	0	0	0	0.23	0	0	0	0	0	1	0	0.06	0	0.0766667	0	0.333333	0	0.949827	0.952797	0.815937	Cldn34c3	EG382265+++Gm5167	mRNA	6	URS00009C2844+++URS00009C39E8+++XM_006528431+++XM_006528432+++XM_006528433+++XM_011247721	coding	known	NC_000086.7	123636868	124079048	+	X|X E3	382265	NO_INFO	NO_INFO	382265	NA	NO_INFO	NA	NA
233549	233549	Mogat2	0.21	0.11	0.14	0	0.22	0.07	0.23	0.13	0.19	0	0.27	0.09	5	3	4	0	6	2	0.0966667	0.153333	0.12	0.183333	2.66667	4	-0.605763	0.94991	0.607499	Mogat2	DGAT2L5+++MGAT2+++Mgat1l	mRNA	6	URS00009B6225+++URS00009B7397+++URS00009C2CA8+++URS0000A7BBB6+++NM_177448+++XM_011241737	coding	known	NC_000073.6	99189586	99238611	+	7|7 E1	233549	NO_INFO	NO_INFO	233549	NA	K14457	Mogat2	NA
53374	53374	Chst3	0.03	0.04	0.03	0.06	0.04	0.03	0.04	0.05	0.04	0.07	0.05	0.03	3	4	3	6	4	3	0.0433333	0.0333333	0.05	0.0433333	4.33333	3.33333	0.367277	0.952797	0.705056	Chst3	C6ST+++C6ST-1+++GST-0	mRNA	6	URS00009B07AB+++NM_016803+++XM_011243510+++XM_011243512+++XM_011243513+++XM_017314030	coding	known	NC_000076.6	60181527	60222114	-	10|10 B4	53374	NO_INFO	NO_INFO	53374	NA	K01020	NA	NA
319277	319277	Washc4	1.55	2.34	2.02	2.05	1.79	1.72	1.68	2.84	2.66	2.67	2.21	2.15	123.01	220	206	207	170	173	1.85333	1.97	2.34333	2.39333	183.333	183.003	0.0166152	0.994608	0.936155	Washc4	A230046K03Rik+++AA589518+++Kiaa1033+++mKIAA1033	mRNA	9	URS00009B2F31+++URS00009B389D+++NM_001033375+++XM_006513737+++XM_006513738+++XM_006513739+++XM_017313963+++XM_030245113+++XM_030245114	coding	known	NC_000076.6	83543194	83596473	+	10|10 C1	319277	NO_INFO	NO_INFO	319277	NA	K18465	NA	NA
12986	12986	Csf3r	1.21	1.84	1.45	1.22	1.22	0.95	1.32	2.23	1.92	1.59	1.51	1.19	49	98	85	66	58	53	1.13	1.5	1.43	1.82333	59	77.3333	-0.372962	0.673203	0.187987	Csf3r	Cd114+++Csfgr+++G-CSF-R+++G-CSFR	mRNA	25	NR_045561+++NM_001252651+++NM_007782+++XM_006502708+++XM_006502709+++XM_006502710+++XM_006502711+++XM_006502712+++XM_006502713+++XM_006502714+++XM_006502716+++XM_006502717+++XM_006502718+++XM_006502719+++XM_011240421+++XM_011240422+++XM_011240423+++XM_017319944+++XM_017319945+++XM_030253157+++XM_030253158+++XM_030253159+++XM_030253160+++XM_030253161+++XM_030253162	coding	known	NC_000070.6	126023441	126044975	+	4 D2.2|4 59.77 cM	12986	NO_INFO	NO_INFO	12986	NA	K05061	Csf3r	NA
16158	16158	Il11ra2	0.06	0.12	0.13	0.11	0.11	0.05	0.07	0.14	0.17	0.15	0.13	0.07	1.38	3.13	3.96	4.01	2.81	1.39	0.09	0.103333	0.116667	0.126667	2.73667	2.82333	0.0217464	0.999812	0.98631	Il11ra2	Etl-2+++Etl2+++Il11ra-ps1	mRNA	2	NM_010550+++XM_006537625	coding	known	NC_000070.6	42655275	42665763	-	4 A5|4 22.73 cM	16158	NO_INFO	NO_INFO	16158	NA	K05056	NA	NA
208677	208677	Creb3l3	172.28	204.65	211.36	257.44	233.61	193.06	187.63	248	279.04	335.95	289.15	242.09	4790	6592	7045	8463	7453	6320	228.037	196.097	289.063	238.223	7412	6142.33	0.274499	0.446061	0.0661415	Creb3l3	BC010786+++CREB-H+++D10Bur1e	mRNA	2	NM_145365+++XM_030244976	coding	known	NC_000076.6	81084324	81098872	-	10 C1|10 39.72 cM	208677	NO_INFO	NO_INFO	208677	NA	K09048	Creb3l3	NA
74026	74026	Msl1	11.35	14.94	12.65	13.99	11.32	10.64	12.36	18.1	16.7	18.26	14.01	13.35	408	639	656	675	508	524	11.9833	12.98	15.2067	15.72	569	567.667	0.0122181	0.997363	0.943984	Msl1	2810017F12Rik+++4121402D02Rik+++4930463F05Rik+++AA682082+++Msl-1	mRNA	7	XR_388540+++NM_001361931+++NM_001361932+++NM_001361933+++NM_001361934+++NM_028722+++XM_011249283	coding	known	NC_000077.6	98793508	98807862	+	11|11 D	74026	NO_INFO	NO_INFO	74026	NA	NO_INFO	NA	NA
100862085	100862085	Gm16867	0.89	0.93	1.12	1.25	0.22	0.17	0.96	1.13	1.48	1.63	0.27	0.21	26.48	31.79	41.52	38.68	11.19	8.92	0.546667	0.98	0.703333	1.19	19.5967	33.2633	-0.797283	0.610361	0.140582	Gm16867	AA437542+++BB104597+++D530039A21Rik+++Gm21464+++Gm28049	mRNA	20	URS00009AF03E+++URS00009B3103+++URS00009B8CE0+++XR_001781314+++XR_001781315+++XR_003950916+++XR_874771+++XR_874773+++XM_011245290+++XM_011245291+++XM_011245293+++XM_011245294+++XM_011245296+++XM_011245297+++XM_011245298+++XM_011245299+++XM_011245300+++XM_011245301+++XM_011245302+++XM_030248111	coding	known	NC_000080.6	69363290	69504096	+	14 D2|14	100862085	NO_INFO	NO_INFO	100862085	NA	NO_INFO	NA	NA
67891	67891	Rpl4	658.81	684.89	544.91	539.21	592.31	565.27	717.49	829.96	719.39	703.67	733.13	708.84	12027	14472	11913	11613	12369	12115	565.597	629.537	715.213	755.613	12032.3	12804	-0.10334	0.906769	0.496488	Rpl4	2010004J23Rik	mRNA	1	NM_024212	coding	known	NC_000075.6	64173387	64178562	+	9|9 C	67891	NO_INFO	NO_INFO	67891	NA	K02930	Rpl4	COG0088///NA
224129	224129	Adcy5	0.18	0.21	0.19	0.18	0.21	0.21	0.2	0.25	0.25	0.23	0.26	0.27	14	24	20	19	20	21	0.2	0.193333	0.253333	0.233333	20	19.3333	0.0577038	0.980502	0.897052	Adcy5	AW121902+++Ac5	mRNA	5	URS00009B333E+++URS00009B9FCD+++URS00009BFAD7+++NM_001012765+++XM_030249085	coding	known	NC_000082.6	35154494	35305743	+	16|16 B3	224129	NO_INFO	NO_INFO	224129	NA	K08045	Adcy5	NA
433182	433182	Eno1b	0	0	0	0	0.12	0	0	0	0	0	0.15	0	0	0	0	0	3.32	0	0.04	0	0.05	0	1.10667	0	2.46379	0.897323	0.481189	Eno1b	EG433182+++Eno-1+++Eno1+++Gm5506+++NNE	mRNA	2	URS00009B2BF9+++NM_001025388	coding	known	NC_000084.6	48045335	48048379	+	18 C|18	433182	NO_INFO	NO_INFO	433182	NA	K01689	NA	COG0148///NA
320661	320661	D5Ertd579e	3.79	4.97	5.43	4.23	4.04	3.78	4.13	6.02	7.17	5.51	4.99	4.74	384	581	658	506	469	450	4.01667	4.73	5.08	5.77333	475	541	-0.175076	0.779472	0.295885	D5Ertd579e	9030221A05Rik+++A930018H20Rik+++Kiaa0232	mRNA	17	URS00009ADE53+++URS00009BF281+++URS00009BF871+++URS00009C3588+++URS00009C4501+++NM_001081232+++XM_006503992+++XM_011240742+++XM_011240743+++XM_011240744+++XM_011240745+++XM_011240746+++XM_011240747+++XM_011240748+++XM_011240749+++XM_011240750+++XM_030254575	coding	known	NC_000071.6	36600483	36696732	+	5 B3|5 19.18 cM	320661	NO_INFO	NO_INFO	320661	NA	NO_INFO	NA	NA
232413	232413	Clec12a	3.08	3.81	3.42	4.22	4.14	3.93	3.36	4.61	4.51	5.51	5.12	4.93	58	84	84	89	92	94	4.09667	3.43667	5.18667	4.16	91.6667	75.3333	0.288276	0.723095	0.232908	Clec12a	CLL-1+++D230024O04+++KLRL1+++Micl	mRNA	2	NM_177686+++XM_011241323	coding	known	NC_000072.6	129349783	129365303	+	6|6 F3	232413	NO_INFO	NO_INFO	232413	NA	NO_INFO	Clec12a	NA
100044193	100044193	Gm20939	0.52	0.22	0.29	0.19	0.23	0.19	0.56	0.27	0.38	0.25	0.28	0.24	19	15	16	12.79	12	9	0.203333	0.343333	0.256667	0.403333	11.2633	16.6667	-0.62868	0.734145	0.243968	Gm20939	NA	mRNA	4	URS0000E008DA+++URS0000E0378B+++NM_001024731+++XM_030249403	coding	known	NC_000083.6	94864804	94879737	+	17|17 E5	100044193	NO_INFO	NO_INFO	100044193	NA	NO_INFO	NA	NA
77727	77727	6030468B19Rik	0	0	0	0	0.09	0	0	0	0	0	0.11	0	0	0	0	0	1	0	0.03	0	0.0366667	0	0.333333	0	0.949827	0.952797	0.815937	6030468B19Rik	Il-40	mRNA	4	NM_029964+++XM_006534498+++XM_006534499+++XM_006534500	coding	known	NC_000077.6	117797634	117807308	+	11|11 E2	77727	NO_INFO	NO_INFO	77727	NA	NO_INFO	NA	NA
16854	16854	Lgals3	7.68	16.75	8.62	6.44	7.55	6.83	8.36	20.3	11.38	8.4	9.35	8.56	135	345	182	135	154	143	6.94	11.0167	8.77	13.3467	144	220.667	-0.586961	0.337458	0.0368954	Lgals3	GBP+++L-34+++Mac-2+++gal3	mRNA	2	NM_001145953+++NM_010705	coding	known	NC_000080.6	47373860	47386167	+	14|14 C1	16854	NO_INFO	NO_INFO	16854	NA	NO_INFO	Lgals3	NA
71707	71707	Ubiad1	3.25	3.8	3.61	3.64	3.34	2.63	3.54	4.6	4.76	4.75	4.13	3.3	138	187	184	183	163	132	3.20333	3.55333	4.06	4.3	159.333	169.667	-0.0917209	0.952797	0.654222	Ubiad1	1200002M06Rik+++AI426463+++AW320947+++Tere1	mRNA	2	NM_027873+++rna-NM_027873.3-2	coding	known	NT_166299.2	1846948	148444760	-	4|4 E2	71707	NO_INFO	NO_INFO	71707	NA	NO_INFO	NA	NA
12861	12861	Cox6a1	1601	1565.76	1233.91	1513.15	1445.45	1272.03	1743.6	1897.4	1629.01	1974.63	1789.13	1595.11	7944	8930	7272	8705	8008	7252	1410.21	1466.89	1786.29	1756.67	7988.33	8048.67	-0.0334843	0.962946	0.84085	Cox6a1	VIaL	mRNA	1	NM_007748	coding	known	NC_000071.6	115345623	115348958	-	5 F|5 56.06 cM	12861	NO_INFO	NO_INFO	12861	NA	K02266	Cox6a1	NA
56873	56873	Lmbr1	0.4	0.39	0.41	0.76	0.44	0.71	0.43	0.48	0.54	0.99	0.55	0.89	31	36	39	70	40	63	0.636667	0.4	0.81	0.483333	57.6667	35.3333	0.696526	0.335956	0.0363765	Lmbr1	1110048D14Rik+++AU017641	mRNA	14	URS00009AD794+++NM_020295+++XM_006535764+++XM_006535765+++XM_006535767+++XM_006535768+++XM_006535770+++XM_006535771+++XM_006535772+++XM_011249782+++XM_011249783+++XM_017321034+++XM_030254722+++XM_030254723	coding	known	NC_000071.6	29229802	29378421	-	5 B1|5 14.81 cM	56873	NO_INFO	NO_INFO	56873	NA	NO_INFO	Lmbr1	NA
67588	67588	Rnf41	1.79	1.6	2.12	2.05	1.81	1.94	1.95	1.94	2.8	2.68	2.24	2.43	115	119	159	156	134	147	1.93333	1.83667	2.45	2.23	145.667	131	0.145654	0.908948	0.501176	Rnf41	2210404G21Rik+++4930511A05Rik+++4933415P08Rik+++D10Ertd722e+++FLRF+++Nrdp1	mRNA	6	NR_104288+++NR_104289+++NR_104290+++URS00009C006F+++NM_001164237+++NM_026259	coding	known	NC_000076.6	128411616	128441441	+	10 D3|10 76.55 cM	67588	NO_INFO	NO_INFO	67588	NA	K11981	Rnf41	NA
17194	17194	Mbl1	233	192.24	150.99	165.18	159.24	144.31	253.76	232.96	199.33	215.56	197.1	180.96	3013	2990	2650	2908	2853	2524	156.243	192.077	197.873	228.683	2761.67	2884.33	-0.0916996	0.94991	0.606318	Mbl1	MBL-A+++MBP-A+++S-MBP	mRNA	2	NM_010775+++XM_006518669	coding	known	NC_000080.6	41151456	41163904	+	14 B|14 22.36 cM	17194	NO_INFO	NO_INFO	17194	NA	K03991	NA	NA
71514	71514	Sfpq	18.82	22.6	22.03	20.65	15.51	15.92	20.5	27.39	29.08	26.94	19.2	19.96	939	1307	1310	1220	890	932	17.36	21.15	22.0333	25.6567	1014	1185.33	-0.225728	0.630513	0.153696	Sfpq	1110004P21Rik+++2810416M14Rik+++5730453G22Rik+++9030402K04Rik+++AU021830+++D4Ertd314e+++Gm12940+++PSF+++REP1	mRNA	15	NR_045010+++URS00009B1E2A+++URS00009B46B4+++URS00009B7B12+++URS00009B8AFB+++URS00009BA223+++URS00009BA819+++URS00009BB10C+++URS00009C1B3E+++XR_001784200+++XR_001784201+++XR_867890+++XR_867891+++NM_023603+++XM_006503406	coding	known	NC_000070.6	127020716	127051101	+	4 D2.2|4 61.2 cM	71514	NO_INFO	NO_INFO	71514	NA	NO_INFO	NA	NA
208795	208795	Tmem63a	1.87	3.47	3.41	3.51	3.55	3.91	2.04	4.2	4.5	4.58	4.4	4.9	89	187	191	194	192	216	3.65667	2.91667	4.62667	3.58	200.667	155.667	0.394898	0.520429	0.0938506	Tmem63a	BC014795+++Tmem64a	mRNA	7	URS000076779A+++URS00009B8D49+++XR_001783670+++NM_144794+++XM_006496721+++XM_006496722+++XM_006496723	coding	known	NC_000067.6	180942286	180975106	+	1|1 H4	208795	NO_INFO	NO_INFO	208795	NA	NO_INFO	NA	NA
16322	16322	Inha	0.16	0.07	0	0.04	0.13	0.04	0.17	0.09	0	0.06	0.16	0.06	4	3	0	1	5	1	0.07	0.0766667	0.0933333	0.0866667	2.33333	2.33333	-0.0644863	0.999812	0.963564	Inha	AW555078	mRNA	3	NM_001329843+++NM_010564+++XM_011238675	coding	known	NC_000067.6	75507077	75510366	+	1 C4|1 39.16 cM	16322	NO_INFO	NO_INFO	16322	NA	K05500	Inha	NA
108153	108153	Adamts7	0.61	0.86	0.53	1.08	1.14	0.78	0.67	1.04	0.7	1.41	1.41	0.98	48	71	47	96	94	68	1	0.666667	1.26667	0.803333	86	55.3333	0.631223	0.3008	0.0294178	Adamts7	ADAM-TS7+++ADAMTS7B	mRNA	11	URS00009AE1BE+++XR_003947760+++NM_001003911+++NM_001311115+++NM_001326294+++NM_001326351+++XM_006510759+++XM_006510760+++XM_006510762+++XM_030244000+++XM_030244001	coding	known	NC_000075.6	90162904	90200102	+	9|9 E3.1	108153	NO_INFO	NO_INFO	108153	NA	NO_INFO	NA	NA
231413	231413	Grsf1	23.08	29.93	30.87	36.92	36.9	34.51	25.13	36.27	40.75	48.18	45.67	43.28	857	1341	1431	1689	1640	1552	36.11	27.96	45.71	34.05	1627	1209.67	0.441917	0.0808167	0.00353338	Grsf1	BB232551+++C80280+++D5Wsu31e	mRNA	2	NM_001098476+++NM_178700	coding	known	NC_000071.6	88659233	88676171	-	5 E1|5 43.85 cM	231413	NO_INFO	NO_INFO	231413	NA	NO_INFO	Grsf1	NA
209588	209588	Sectm1a	0.38	0.66	0.74	0.68	0.41	0.57	0.42	0.8	0.97	0.88	0.51	0.72	8	16	19	17	10	14	0.553333	0.593333	0.703333	0.73	13.6667	14.3333	-0.0508617	0.989816	0.92559	Sectm1a	BC010462	mRNA	8	URS0000770BD6+++URS00009AF6CF+++URS00009C536E+++NM_145373+++XM_006532748+++XM_006532750+++XM_017314413+++XM_017314414	coding	known	NC_000077.6	121067395	121097208	+	11|11 E2	209588	NO_INFO	NO_INFO	209588	NA	NO_INFO	NA	NA
217700	217700	Acot6	0.25	0.25	0.51	0.73	0.11	0.35	0.27	0.3	0.68	0.95	0.13	0.44	6	7.02	15	21.03	3.01	10	0.396667	0.336667	0.506667	0.416667	11.3467	9.34	0.278324	0.952797	0.708597	Acot6	4632408A20Rik+++A330054B07+++BE688602	mRNA	1	NM_172580	coding	known	NC_000078.6	84100654	84109783	+	12|12 D1	217700	NO_INFO	NO_INFO	217700	NA	NO_INFO	NA	NA
320558	320558	Sycp2	0	0.01	0	0	0	0	0	0.01	0	0	0	0	0	1	0	0	0	0	0	0.00333333	0	0.00333333	0	0.333333	-0.973727	0.952797	0.811392	Sycp2	3830402K23Rik+++4930518F03Rik	mRNA	11	URS00009AD973+++URS00009ADABC+++URS00009B99FA+++URS00009BE38B+++XR_003953467+++NM_177191+++XM_006500664+++XM_017319020+++XM_030251757+++XM_030251758+++XM_030251759	coding	known	NC_000068.7	178345295	178409292	+	2|2 H4	320558	NO_INFO	NO_INFO	320558	NA	NO_INFO	NA	NA
217664	217664	Mgat2	16	19.75	20.63	15.05	14.2	15.32	17.42	23.94	27.23	19.64	17.58	19.21	589	843	911	656	601	665	14.8567	18.7933	18.81	22.8633	640.667	781	-0.277942	0.43229	0.0616099	Mgat2	AA407964+++CDGS2+++GLCNACTII+++GNT-II+++GNT2	mRNA	1	NM_146035	coding	known	NC_000078.6	69184158	69186773	+	12|12 C2	217664	NO_INFO	NO_INFO	217664	NA	K00736	NA	NA
19348	19348	Kif20a	0.28	0.38	0.68	0.45	0.59	0.68	0.3	0.46	0.9	0.59	0.73	0.85	14	23	42	27	35	40	0.573333	0.446667	0.723333	0.553333	34	26.3333	0.398972	0.829469	0.354537	Kif20a	AA415432+++Rab6kifl	mRNA	3	NM_001166406+++NM_001166407+++NM_009004	coding	known	NC_000084.6	34624624	34633277	+	18 B1|18 18.69 cM	19348	NO_INFO	NO_INFO	19348	NA	NO_INFO	Kif20a	NA
77048	77048	Cep83	1.81	2.75	1.76	2.27	1.84	2.25	1.97	3.34	2.32	2.96	2.27	2.82	78	137	91	115	91	114	2.12	2.10667	2.68333	2.54333	106.667	102	0.0688575	0.952797	0.78498	Cep83	2600001G24Rik+++4921537D05Rik+++5730513H21Rik+++Ccdc41	mRNA	4	URS00009BB5D6+++URS0000A94DE0+++NM_029852+++XM_006514300	coding	known	NC_000076.6	94688624	94790336	+	10|10 C2	77048	NO_INFO	NO_INFO	77048	NA	NO_INFO	Cep83	NA
242700	242700	Ifnlr1	0.09	0	0	0.01	0	0	0.09	0	0	0.02	0	0	5	0	0	1	0	0	0.00333333	0.03	0.00666667	0.03	0.333333	1.66667	-2.44614	0.801981	0.322875	Ifnlr1	CRF2-12+++Il28ra	mRNA	1	NM_174851	coding	known	NC_000070.6	135686457	135708181	+	4|4 D3	242700	NO_INFO	NO_INFO	242700	NA	K05140	NA	NA
107508	107508	Eprs	21.25	22.58	20.63	20.3	17.45	18.2	23.14	27.36	27.24	26.49	21.61	22.83	1360	1791	1789	1725	1439	1557	18.65	21.4867	23.6433	25.9133	1573.67	1646.67	-0.067851	0.94991	0.601678	Eprs	2410081F06Rik+++3010002K18Rik+++C79379+++Eprs1+++Qprs	mRNA	9	URS0000811FD3+++URS0000811FE2+++URS00009BB395+++URS00009BC2E2+++NM_001357474+++NM_029735+++XM_011238908+++XM_017320653+++XM_030254860	coding	known	NC_000067.6	185359461	185428360	+	1|1 H5	107508	NO_INFO	NO_INFO	107508	NA	K14163	Eprs	NA
140484	140484	Pofut1	0.75	1.55	1.81	1.57	1.23	1.27	0.82	1.88	2.39	2.05	1.53	1.6	64	151	181	156	119	127	1.35667	1.37	1.72667	1.69667	134	132	0.0574018	0.96299	0.841931	Pofut1	O-FucT-1+++mKIAA0180	mRNA	2	NM_080463+++XM_011239283	coding	known	NC_000068.7	153241532	153271029	+	2|2 H1	140484	NO_INFO	NO_INFO	140484	NA	K03691	Pofut1	NA
654824	654824	Ankrd37	0.45	0.25	0.66	0.21	0.42	1.02	0.49	0.31	0.87	0.28	0.52	1.28	5	3	8	3	6	13	0.55	0.453333	0.693333	0.556667	7.33333	5.33333	0.456411	0.947051	0.592234	Ankrd37	NA	mRNA	3	NM_001039562+++XM_030243709+++XM_030243710	coding	known	NC_000074.6	45996908	46000414	-	8|8 B1.1	654824	NO_INFO	NO_INFO	654824	NA	NO_INFO	Ankrd37	NA
330173	330173	2610524H06Rik	0.18	0.48	0.15	0.16	0.73	0.24	0.2	0.58	0.2	0.21	0.9	0.3	2	6	2	2	9	3	0.376667	0.27	0.47	0.326667	4.66667	3.33333	0.518711	0.952797	0.621547	2610524H06Rik	NA	mRNA	1	NM_181075	coding	known	NC_000071.6	114821937	114823468	-	5|5 F	330173	NO_INFO	NO_INFO	330173	NA	NO_INFO	NA	NA
104252	104252	Cdc42ep2	3.05	2.99	4.06	3.24	3.84	4.27	3.32	3.63	5.36	4.23	4.76	5.36	59	67	94	74	85	97	3.78333	3.36667	4.78333	4.10333	85.3333	73.3333	0.2222	0.862201	0.411222	Cdc42ep2	1110008C05Rik+++Borg1+++Cep2+++D19Bwg1013e	mRNA	2	URS00009BB01C+++NM_026772	coding	known	NC_000085.6	5917556	5924816	-	19 A|19 4.34 cM	104252	NO_INFO	NO_INFO	104252	NA	NO_INFO	Cdc42ep2	NA
208104	208104	Mlxip	1.16	1.32	1.24	1.08	1.06	1.31	1.26	1.6	1.63	1.41	1.31	1.64	127	168	163	141	134	170	1.15	1.24	1.45333	1.49667	148.333	152.667	-0.0421781	0.961616	0.837897	Mlxip	AW228700+++Mir+++bHLHe36	mRNA	12	URS0000767BE7+++URS0000775F20+++URS0000811BA3+++URS00009AE7DD+++URS00009B3327+++URS00009B8DE5+++URS00009BC3F8+++URS00009BD58D+++URS00009C0B73+++NM_133917+++NM_177582+++XM_006530239	coding	known	NC_000071.6	123384170	123457932	+	5|5 F	208104	NO_INFO	NO_INFO	208104	NA	K09113	Mlxip	NA
23808	23808	Ash2l	3.27	3.93	4.32	4.07	4.54	4.8	3.56	4.76	5.71	5.32	5.63	6.02	133	186	225	214	223	234	4.47	3.84	5.65667	4.67667	223.667	181.333	0.31287	0.552601	0.111617	Ash2l	NA	mRNA	8	URS00009C3B06+++URS00009C52B5+++XR_001778438+++NM_001080793+++NM_001286207+++NM_001359012+++NM_011791+++XM_011242136	coding	known	NC_000074.6	25816000	25847694	+	8|8 A2	23808	NO_INFO	NO_INFO	23808	NA	K14964	NA	NA
16453	16453	Jak3	3.9	4.26	3.83	3.12	2.96	3.65	4.25	5.16	5.06	4.07	3.66	4.58	211.05	269.06	249.64	198.27	187.19	235.57	3.24333	3.99667	4.10333	4.82333	207.01	243.25	-0.23831	0.691975	0.203299	Jak3	fae+++wil	mRNA	2	NM_001190830+++NM_010589	coding	known	NC_000074.6	71676383	71690577	+	8 B3.3|8 34.43 cM	16453	NO_INFO	NO_INFO	16453	NA	K11218	NA	NA
76123	76123	Gpsm2	1.9	2.26	2.41	2.34	2.22	2.62	2.07	2.74	3.18	3.06	2.75	3.29	97	133	146	141	129	157	2.39333	2.19	3.03333	2.66333	142.333	125.333	0.187839	0.844888	0.374842	Gpsm2	6230410J09Rik+++LGN+++Pins	mRNA	4	URS0000811A52+++URS00009AF9CE+++NM_029522+++XM_006502256	coding	known	NC_000069.6	108678270	108722331	+	3|3 F3	76123	NO_INFO	NO_INFO	76123	NA	NO_INFO	Gpsm2	NA
72780	72780	Rspo3	2.24	2.07	2.3	1.37	1.59	2.01	2.44	2.5	3.03	1.78	1.97	2.52	75	80	92	54	61	79	1.65667	2.20333	2.09	2.65667	64.6667	82.3333	-0.355322	0.685062	0.197279	Rspo3	2810459H04Rik+++AW742308+++Cristin1+++Thsd2	mRNA	3	URS00009B076D+++URS0000AA02E2+++NM_028351	coding	known	NC_000076.6	29453106	29614471	+	10|10 A4	72780	NO_INFO	NO_INFO	72780	NA	K23098	NA	NA
544922	544922	Zkscan4	0.26	0.33	0.36	0.12	0.18	0.15	0.29	0.4	0.48	0.16	0.22	0.19	9	13	15	5	7	6	0.15	0.316667	0.19	0.39	6	12.3333	-1.02896	0.562081	0.116176	Zkscan4	AI841875+++Gm11272	mRNA	2	URS0000EECB53+++NM_001039115	coding	known	NC_000079.6	21478849	21485507	+	13 A3.1|13	544922	NO_INFO	NO_INFO	544922	NA	NO_INFO	NA	NA
67785	67785	Zmym4	0.88	0.86	0.84	0.8	0.81	0.76	0.96	1.04	1.11	1.04	1	0.96	89	102	105	99	97	94	0.79	0.86	1	1.03667	96.6667	98.6667	-0.0373892	0.973023	0.869131	Zmym4	6330503C17Rik+++AI480785+++AW493829+++CDIR+++D630001M21+++MYM+++Zfp262+++Znf262+++mKIAA0425	mRNA	13	URS00009B30AC+++URS00009B4E70+++URS00009B5408+++URS00009B93A9+++URS00009BB0AE+++URS00009C0864+++URS00009C3D85+++URS00009C3F26+++NM_001114399+++NM_001357201+++XM_006503343+++XM_006503344+++XM_030253729	coding	known	NC_000070.6	126861819	126969379	+	4|4 D2.2	67785	NO_INFO	NO_INFO	67785	NA	NO_INFO	NA	NA
66595	66595	Aste1	1.07	1.61	1.78	0.9	1.1	1.18	1.17	1.95	2.35	1.17	1.37	1.48	46	66	61	45	46	52	1.06	1.48667	1.34	1.82333	47.6667	57.6667	-0.271909	0.825435	0.348786	Aste1	1100001A21Rik+++AV006403	mRNA	13	NR_152139+++URS00009AF925+++URS00009B6477+++URS00009C08B5+++XR_871094+++NM_001164828+++NM_001357902+++NM_025651+++XM_006511784+++XM_006511787+++XM_006511789+++XM_030244493+++XM_030244494	coding	known	NC_000075.6	105395294	105410626	+	9|9 F1	66595	NO_INFO	NO_INFO	66595	NA	NO_INFO	NA	NA
12484	12484	Cd24a	1.48	2.51	0.89	0.97	1.9	1.15	1.61	3.05	1.17	1.27	2.35	1.44	36	71	26	28	53	33	1.34	1.62667	1.68667	1.94333	38	44.3333	-0.212894	0.952797	0.623458	Cd24a	Cd24+++HSA+++Ly-52+++nectadrin	mRNA	2	URS00009AFB67+++NM_009846	coding	known	NC_000076.6	43579169	43584265	+	10 B2|10 23.01 cM	12484	NO_INFO	NO_INFO	12484	NA	K06469	Cd24a	NA
73998	73998	Herc3	0.56	0.56	0.42	0.89	0.53	0.71	0.61	0.67	0.56	1.16	0.66	0.9	34	41	36	65	42	61	0.71	0.513333	0.906667	0.613333	56	37	0.585692	0.456569	0.0698516	Herc3	5730409F18Rik+++AI646603+++mKIAA0032	mRNA	17	URS00009B212D+++XR_001785176+++XR_001785177+++XR_001785178+++XR_003956257+++XR_377495+++XR_377496+++NM_001361966+++NM_001361967+++NM_028705+++XM_006506696+++XM_006506697+++XM_006506698+++XM_006506701+++XM_011241490+++XM_030255634+++XM_030255635	coding	known	NC_000072.6	58831455	58920398	+	6|6 B3	73998	NO_INFO	NO_INFO	73998	NA	K10614	Herc3	NA
66684	66684	Tceal8	13.87	11.41	8.63	6.58	6.86	7.94	15.1	13.83	11.39	8.59	8.49	9.96	433	413	323	243	246	292	7.12667	11.3033	9.01333	13.44	260.333	389.667	-0.615766	0.131759	0.0073556	Tceal8	3930402F23Rik	mRNA	2	NM_001168578+++NM_025703	coding	known	NC_000086.7	136168984	136172251	-	X|X F1	66684	NO_INFO	NO_INFO	66684	NA	NO_INFO	NA	NA
56334	56334	Tmed2	51.09	81.36	78.34	78.62	71.57	71.02	55.64	98.59	103.43	102.6	88.59	89.06	1372	2531	2522	2496	2205	2245	73.7367	70.2633	93.4167	85.8867	2315.33	2141.67	0.135145	0.871529	0.434148	Tmed2	1110032D12Rik+++1810020N21Rik+++Rnp24+++Sid394+++p24beta1	mRNA	1	NM_019770	coding	known	NC_000071.6	124540791	124550503	+	5|5 F	56334	NO_INFO	NO_INFO	56334	NA	NO_INFO	NA	NA
320528	320528	Vps13c	1.19	1.61	1.94	2.01	1.95	1.78	1.3	1.95	2.56	2.63	2.41	2.23	200	293	387	381	352	331	1.91333	1.58	2.42333	1.93667	354.667	293.333	0.289025	0.616626	0.144941	Vps13c	AI552542+++AV026040+++C230055H22Rik+++W51662+++chorein	mRNA	9	URS00009BE4EC+++URS00009C0E0F+++XR_001778932+++XR_379424+++NM_177184+++XM_006511224+++XM_006511225+++XM_006511226+++XM_006511228	coding	known	NC_000075.6	67840316	67997744	+	9|9 C	320528	NO_INFO	NO_INFO	320528	NA	NO_INFO	NA	COG5043///NA
56644	56644	Clec7a	3.89	5.02	3.81	2.23	2.68	2.15	4.23	6.08	5.03	2.91	3.32	2.7	115	172	135	78	91	75	2.35333	4.24	2.97667	5.11333	81.3333	140.667	-0.788131	0.0296178	0.000787972	Clec7a	BGR+++Clecsf12+++beta-GR	mRNA	2	NR_132130+++NM_001309637	coding	known	NC_000072.6	129461591	129472785	-	6|6 F3	56644	NO_INFO	NO_INFO	56644	NA	K10074	Clec7a	NA
226470	226470	Zbtb41	0.94	0.78	1	1.02	0.96	0.96	1.02	0.94	1.32	1.33	1.19	1.2	118	116	152	153	143	144	0.98	0.906667	1.24	1.09333	146.667	128.667	0.178383	0.861121	0.40882	Zbtb41	8430415N23Rik+++9430031N01+++9830132G07Rik+++AI316857	mRNA	9	URS00009AF6E4+++URS00009B1720+++URS00009B5CA1+++URS00009B6918+++URS00009BC842+++NM_172643+++XM_006529446+++XM_006529447+++XM_006529448	coding	known	NC_000067.6	139422000	139453007	+	1|1 F	226470	NO_INFO	NO_INFO	226470	NA	NO_INFO	NA	NA
243853	243853	Fkrp	3.14	4.71	4.55	4.29	3.83	4.99	3.42	5.7	6.01	5.6	4.74	6.26	125	217	217	202	175	234	4.37	4.13333	5.53333	5.04333	203.667	186.333	0.144537	0.908075	0.499324	Fkrp	A830029B19Rik+++AI842067+++AI847300+++LGMD1I+++MDC1C	mRNA	5	NM_001358846+++NM_173430+++XM_006539929+++XM_006539930+++XM_011250562	coding	known	NC_000073.6	16809267	16816732	-	7|7 A2	243853	NO_INFO	NO_INFO	243853	NA	K19873	NA	NA
381678	381678	Zcwpw1	1.47	1.74	1.56	1.62	1.24	1.39	1.6	2.11	2.05	2.11	1.54	1.74	45	62	58	61	44	50	1.41667	1.59	1.79667	1.92	51.6667	55	-0.0931924	0.952797	0.749328	Zcwpw1	Gm1053	mRNA	5	URS00009BAEC8+++NM_001005426+++NM_001360023+++XM_006504585+++XM_030254625	coding	known	NC_000071.6	137787157	137822621	+	5|5 G2	381678	NO_INFO	NO_INFO	381678	NA	NO_INFO	NA	NA
20670	20670	Sox15	0	0.19	0	0	0	0.06	0	0.23	0	0	0	0.08	0	3	0	0	0	1	0.02	0.0633333	0.0266667	0.0766667	0.333333	1	-1.38748	0.952797	0.632986	Sox15	NA	mRNA	1	NM_009235	coding	known	NC_000077.6	69655037	69656727	+	11 B3|11 42.86 cM	20670	NO_INFO	NO_INFO	20670	NA	NO_INFO	NA	NA
637515	637515	Nlrp1b	0.17	0.2	0.18	0.19	0.18	0.03	0.18	0.25	0.24	0.24	0.23	0.04	14.99	18.87	16.89	18.45	17	4.04	0.133333	0.183333	0.17	0.223333	13.1633	16.9167	-0.308206	0.94991	0.604551	Nlrp1b	Nalp1b	mRNA	16	URS00009C2BB6+++XR_001780036+++XR_001780037+++NM_001040696+++NM_001162414+++XM_006533907+++XM_017314698+++XM_017314699+++XM_017314700+++XM_017314701+++rna-NM_001040696.1-2+++rna-NM_001040696.1-3+++rna-NM_001040696.1-4+++rna-NM_001162414.1-2+++rna-NM_001162414.1-3+++rna-NM_001162414.1-4	coding	known	NT_187026.1	95524	71242514	-	11|11 B4	637515	NO_INFO	NO_INFO	637515	NA	K12798	NA	NA
67230	67230	Zfp329	0.38	0.27	0.3	0.26	0.19	0.19	0.41	0.32	0.4	0.34	0.23	0.24	45	37	41	33	24	26	0.213333	0.316667	0.27	0.376667	27.6667	41	-0.597156	0.54684	0.105536	Zfp329	2810439M05Rik+++4632409L22Rik+++ZNF329	mRNA	7	URS00009C468C+++XR_003946543+++XR_003946544+++NM_026046+++XM_006540315+++XM_011250682+++XM_030242923	coding	known	NC_000073.6	12803778	12818895	-	7|7 A1	67230	NO_INFO	NO_INFO	67230	NA	NO_INFO	NA	NA
170787	170787	Hdac10	3.8	3.39	3.24	2.51	3.92	2.42	4.13	4.11	4.28	3.27	4.85	3.03	128	132	131	100	151	96	2.95	3.47667	3.71667	4.17333	115.667	130.333	-0.185169	0.897323	0.479895	Hdac10	AW548891+++Hd10	mRNA	7	NR_028447+++NR_028448+++NR_028449+++XR_001781503+++NM_199198+++XM_006520537+++XM_006520543	coding	known	NC_000081.6	89123303	89128700	-	15|15 E3	170787	NO_INFO	NO_INFO	170787	NA	K18671	NA	NA
68481	68481	Mpzl1	0.97	1.3	0.76	1.59	1.35	0.71	1.05	1.57	1.01	2.07	1.67	0.89	30	49	30	61	50	27	1.21667	1.01	1.54333	1.21	46	36.3333	0.335965	0.848144	0.387031	Mpzl1	1110007A10Rik+++PZR	mRNA	5	URS00009AF46F+++URS00009B1B77+++NM_001001880+++NM_001083897+++NM_001347128	coding	known	NC_000067.6	165592176	165634541	-	1|1 H2.3	68481	NO_INFO	NO_INFO	68481	NA	K06770	Mpzl1	NA
60525	60525	Acss2	42.89	38.74	94.71	61.86	68.02	73.23	46.71	46.94	125.04	80.73	84.19	91.83	1724	1805	4567	2944	3143	3471	67.7033	58.78	85.5833	72.8967	3186	2698.67	0.264981	0.833022	0.359452	Acss2	1110017C11Rik+++ACAS+++ACS+++Acas1+++Acas2+++AceCS1+++Acs1+++aceCS	mRNA	3	URS00009B12E7+++URS00009B9198+++NM_019811	coding	known	NC_000068.7	155518043	155562743	+	2|2 H1	60525	NO_INFO	NO_INFO	60525	NA	K01895	NA	COG0365///NA
16004	16004	Igf2r	1.85	2.61	3.46	3.38	2.76	2.69	2.02	3.16	4.57	4.42	3.41	3.37	250	408	561	542	429	429	2.94333	2.64	3.73333	3.25	466.667	406.333	0.221925	0.795431	0.315784	Igf2r	AI661837+++CD222+++CI-MPR+++M6P/IGF2R+++Mpr300	mRNA	6	URS00009ADFEF+++URS00009B6269+++URS00009B6DB2+++URS00009BCB54+++NM_010515+++rna-NM_010515.2-2	coding	known	NT_097336.1	97811	12769706	+	17 A1|17 8.64 cM	16004	NO_INFO	NO_INFO	16004	NA	K06564	Igf2r	NA
12068	12068	Bet1	23.52	17.88	15.9	15.14	16.6	16.98	25.62	21.67	20.99	19.75	20.54	21.29	454	399	370	348	370	388	16.24	19.1	20.5267	22.76	368.667	407.667	-0.178882	0.856639	0.401772	Bet1	AW555236+++Bet-1	mRNA	2	NM_009748+++XM_006504971	coding	known	NC_000072.6	4076899	4086998	-	6|6 A1	12068	NO_INFO	NO_INFO	12068	NA	K08504	NA	NA
56369	56369	Apip	19.32	16.9	12.74	11.42	14.25	13.04	21.04	20.48	16.82	14.91	17.64	16.36	202	205	160	141	170	160	12.9033	16.32	16.3033	19.4467	157	189	-0.292744	0.705492	0.217838	Apip	APIP2+++CGI-29+++Mmrp19	mRNA	6	NM_001355473+++NM_001355474+++NM_019735+++rna-NM_001355473.1-2+++rna-NM_001355474.1-2+++rna-NM_019735.4-2	coding	known	NT_039223.3	90415	103092649	+	2|2 E2	56369	NO_INFO	NO_INFO	56369	NA	K08964	NA	COG0235///NA
70572	70572	Ipo5	8.65	11.58	12.21	13.29	11.68	11.56	9.43	14.04	16.13	17.35	14.46	14.5	585	908	991	1065	909	923	12.1767	10.8133	15.4367	13.2	965.667	828	0.234342	0.612109	0.142047	Ipo5	1110011C18Rik+++5730478E03Rik+++AA409333+++C76941+++IMB3+++Kpnb3+++Ranbp5+++imp5	mRNA	5	URS00009AD076+++NM_001360602+++NM_023579+++XM_030248018+++XM_030248019	coding	known	NC_000080.6	120896840	120948046	+	14|14 E4- E5	70572	NO_INFO	NO_INFO	70572	NA	K20222	Ipo5	COG5215///NA
227333	227333	Dgkd	1.67	2.1	2.92	2.91	2.66	2.26	1.82	2.54	3.85	3.79	3.3	2.83	150	213	297	299	264	233	2.61	2.23	3.30667	2.73667	265.333	220	0.284144	0.677172	0.192086	Dgkd	AI841987+++D330025K09+++DGKdelta+++dgkd-2	mRNA	9	URS00009B23C3+++URS00009C21EB+++XR_003955002+++NM_177646+++XM_006529471+++XM_006529472+++XM_011247988+++XM_017320352+++XM_030253733	coding	known	NC_000067.6	87853264	87945177	+	1|1 D	227333	NO_INFO	NO_INFO	227333	NA	K00901	Dgkd	COG0818///NA
226652	226652	Arhgap30	0.64	1.49	0.86	0.86	0.92	0.72	0.69	1.81	1.13	1.12	1.14	0.9	42	114	68	67	70	56	0.833333	0.996667	1.05333	1.21	64.3333	74.6667	-0.185838	0.938832	0.568422	Arhgap30	6030405P05Rik+++Gm102+++mFLJ00267	mRNA	1	NM_001005508	coding	known	NC_000067.6	171388960	171410240	+	1|1 H3	226652	NO_INFO	NO_INFO	226652	NA	NO_INFO	NA	NA
17921	17921	Myo7a	2.35	2.11	2.5	1.73	1.65	1.86	2.56	2.56	3.3	2.26	2.04	2.34	252	262	321	220	204	236	1.74667	2.32	2.21333	2.80667	220	278.333	-0.349069	0.431584	0.0610775	Myo7a	Hdb+++Myo7+++USH1B+++nmf371+++polka+++sh-1+++sh1	mRNA	11	NM_001256081+++NM_001256082+++NM_001256083+++NM_008663+++XM_006507427+++XM_006507428+++XM_006507429+++XM_011241688+++XM_011241689+++XM_011241690+++XM_011241691	coding	known	NC_000073.6	98051054	98119522	-	7 E1|7 53.57 cM	17921	NO_INFO	NO_INFO	17921	NA	NO_INFO	Myo7a	NA
276950	276950	Slfn8	0.66	1.13	0.92	0.82	0.77	0.48	0.72	1.37	1.22	1.07	0.96	0.61	32	71	57	48	43	33	0.69	0.903333	0.88	1.10333	41.3333	53.3333	-0.347288	0.78328	0.302462	Slfn8	mSLFN8	mRNA	9	NM_001167743+++NM_181545+++XM_030246054+++rna-NM_001167743.1-2+++rna-NM_001167743.1-3+++rna-NM_001167743.1-4+++rna-NM_181545.4-2+++rna-NM_181545.4-3+++rna-NM_181545.4-4	coding	known	NW_019168514.1	67608	83020810	-	11|11 C	276950	NO_INFO	NO_INFO	276950	NA	NO_INFO	NA	NA
75406	75406	Ndufs7	234.53	171.97	122.9	150.19	169.07	152.88	255.42	208.4	162.26	196	209.27	191.7	1882	1600	1186	1422	1541	1427	157.38	176.467	198.99	208.693	1463.33	1556	-0.13678	0.938832	0.568302	Ndufs7	1010001M04Rik+++CI-20kD	mRNA	4	NM_001364694+++NM_029272+++XM_006514270+++XM_030245344	coding	known	NC_000076.6	80249105	80256794	+	10 C1|10 39.72 cM	75406	NO_INFO	NO_INFO	75406	NA	K03940	NA	NA
14081	14081	Acsl1	350.25	281.47	353.45	549.42	548.82	476.28	381.45	341.09	466.63	716.99	679.31	597.25	19038	18100	24019	36484	35263	31339	524.84	328.39	664.517	396.39	34362	20385.7	0.737735	0.000796255	7.60454e-06	Acsl1	Acas+++Acas1+++Acs+++FACS+++Facl2+++LACS 1+++LACS1	mRNA	8	NM_001302163+++NM_007981+++XM_006509262+++XM_006509264+++XM_006509265+++XM_006509266+++XM_017312563+++XM_030243285	coding	known	NC_000074.6	46471037	46536051	+	8|8 B1.1	14081	NO_INFO	NO_INFO	14081	NA	K01897	Acsl1	COG0318///NA+++COG1022///NA
100043604	100043604	Vmn1r132	0.03	0	0	0	0	0	0.03	0	0	0	0	0	1	0	0	0	0	0	0	0.01	0	0.01	0	0.333333	-0.973727	0.952797	0.811392	Vmn1r132	EG667346+++Gm16448	mRNA	1	NM_001122682	coding	known	NC_000073.6	21612745	21615147	+	7|7 A3	100043604	NO_INFO	NO_INFO	100043604	NA	NO_INFO	NA	NA
16469	16469	Jrk	0.12	0.09	0.15	0.1	0.03	0.11	0.13	0.11	0.2	0.13	0.04	0.14	10	9	15	10	3	11	0.08	0.12	0.103333	0.146667	8	11.3333	-0.515344	0.878135	0.44778	Jrk	NA	mRNA	1	NM_008415	coding	known	NC_000081.6	74702412	74709322	-	15 D3|15 34.26 cM	16469	NO_INFO	NO_INFO	16469	NA	NO_INFO	NA	NA
194401	194401	Mical3	3.22	2.47	1.85	3.26	2.84	2.91	3.5	2.99	2.45	4.25	3.51	3.64	334	335	327	417	348	326	3.00333	2.51333	3.8	2.98	363.667	332	0.107525	0.939054	0.569314	Mical3	C130040D16Rik+++Mical-3+++mKIAA1364	mRNA	40	NR_138097+++URS00008C4301+++URS00009AEDC6+++URS00009B355D+++URS00009B7FA2+++URS00009BAAEC+++URS00009BD8A4+++URS00009C0874+++URS00009C4A97+++URS00009C4DAF+++rna-NR_138097.1-2+++NM_001270475+++NM_153396+++XM_006505800+++XM_011241258+++XM_030255246+++XM_030255247+++XM_030255248+++XM_030255249+++XM_030255250+++XM_030255251+++XM_030255252+++XM_030255253+++XM_030255254+++XM_030255255+++XM_030255257+++X…	coding	known	NT_039382.4	556177	121173757	+	6|6 F1	194401	NO_INFO	NO_INFO	194401	NA	NO_INFO	NA	NA
11889	11889	Asgr1	436.47	399.46	390.98	335.83	353.73	350.95	475.34	484.08	516.17	438.26	437.83	440.08	6833	7268	7379	6229	6350	6479	346.837	408.97	438.723	491.863	6352.67	7160	-0.188971	0.670448	0.184577	Asgr1	ASGPR1+++Asgr+++Asgr-1+++HL-1	mRNA	7	NM_001291131+++NM_001291132+++NM_009714+++XM_017314231+++rna-NM_001291131.1-2+++rna-NM_001291132.1-2+++rna-NM_009714.3-2	coding	known	NT_187026.1	158606	70057895	+	11 B3|11 42.98 cM	11889	NO_INFO	NO_INFO	11889	NA	K10063	Asgr1	NA
101056115	101056115	Gm17067	0	0	0	0	0.02	0	0	0	0	0	0.02	0	0	0	0	0	1	0	0.00666667	0	0.00666667	0	0.333333	0	0.949827	0.952797	0.815937	Gm17067	NA	mRNA	1	XM_030243145	coding	known	NC_000073.6	42705037	42711444	-	7 28.25 cM|7 B3	101056115	NO_INFO	NO_INFO	101056115	NA	NO_INFO	NA	NA
[truncated: 15,170 more rows]
[truncated: 15 more columns]
