# Supplementary material for: Hydrolyzing NAD to NMN and AMP by SelO is Required for Mitochondria Homeostasis
Source: Research Square preprint supplement (doi:10.21203/rs.3.rs-5137152/v1), 2024-10-17
Supplement: Supplementary file 3 [file 61a5fe574aa2cfcc5e798ff9.xlsx]

## Sheet: Sheet1
UniProt ID	Autodock4 Score	Vina Score	LeDock Score
A0A096LP55	-2.44	-6.38	-6.15
A0A0B4J2D5	-3.92	-5.81	-7.97
A1A4Y4	-6.63	-7.23	-8.76
A1XBS5	-2.06	-6.19	-7.98
A2RU30	-3.2	-6.41	-7.35
A3KMH1	-4.19	-10.04	-7.88
A6NDV4	-3.63	-8.01	-7.21
A6NFY7	-5.6	-8.76	-9.88
A6NJ78	-4.87	-9.73	-13.47
A6NK06	-3.6	-7.74	-9.31
A6NK58	-2.88	-7.59	-7.62
A8MTT3	-1.22	-5.93	-6.47
A8MUP2	-5.24	-9	-9.31
B7ZC32	-5.91	-8.95	-7.08
E9PQ53	-1.74	-6.16	-7.16
O00141	-4.05	-8.02	-9.74
O00142	-2.71	-10.78	-12.32
O00154	-3.52	-8.33	-8.34
O00264	-3.5	-7.55	-7.72
O00330	-5.53	-6.45	-7.5
O00408	-3.97	-9.09	-7.92
O00411	-2.64	-8.12	-9.12
O00429	-2.78	-9.2	-8.19
O00483	-2.85	-6.54	-7.6
O00571	-4.36	-8.42	-8.09
O00584	-4.48	-6.43	-9.38
O00743	-3.1	-7.8	-9.23
O00746	-6.45	-9.35	-10.26
O00763	-6.06	-10.7	-8.45
O14521	-3.17	-7.16	-7.31
O14548	-1.88	-6.12	-6.7
O14561	-3.09	-5.31	-6.86
O14786	-5.19	-8.68	-8.39
O14874	-3.65	-9.34	-9.43
O14879	-3.58	-7.69	-9.46
O14880	-2.9	-6.76	-7.32
O14929	-2.46	-8.74	-11.62
O14957	-1.49	-5.28	-6.18
O15091	-5.08	-9.04	-8.96
O15121	-3.68	-9.65	-10.54
O15164	-3.29	-7.42	-6.71
O15235	-3.84	-6.27	-7.71
O15239	-3.48	-6.89	-7.07
O15294	-3.6	-8.74	-7.92
O15382	-3.38	-8.16	-10.04
O15527	-3.4	-7.79	-9.59
O15528	-4.96	-9.35	-10.08
O43169	-3.86	-7.74	-7.83
O43181	-2.41	-6.68	-9.32
O43236	-2.83	-7.99	-9.6
O43272	-4.26	-10.2	-11.01
O43427	-4.71	-6.59	-8.8
O43464	-4.12	-7.58	-8.74
O43502	-4.46	-7.05	-7.1
O43524	-3.47	-6.41	-7
O43542	-4.65	-9.3	-7.14
O43572	-2.87	-7.26	-7.81
O43615	-4.64	-8.16	-9.45
O43674	-2.15	-7.46	-4.69
O43676	-0.64	-7.15	-6.94
O43678	-3.9	-5.18	-7.44
O43715	-2.96	-5.94	-6.88
O43716	-2.61	-6.85	-6.79
O43766	-5.02	-9.25	-10.91
O43772	-4.15	-7.42	-7.15
O43819	-2.17	-8.17	-8.91
O43822	-4.22	-7.42	-8.68
O43837	-3.84	-8.03	-10.26
O43847	-4.88	-8.99	-8.81
O43865	-2.42	-9.56	-12.01
O43900	-3	-8.89	-8.03
O43920	-3.11	-5.35	-7.56
O60239	-3.46	-6.62	-6.61
O60260	-4.03	-7.79	-8.27
O60313	-3.73	-8.55	-8.11
O60333	-5.69	-7.83	-7
O60427	-3	-6.38	-10.24
O60488	-4.3	-7.92	-7.95
O60522	-6.22	-8.09	-7.65
O60733	-3.19	-9.06	-9.01
O60783	-4.09	-7	-8.04
O60830	-3.64	-6.03	-6.48
O60936	-2.8	-6.68	-7.65
O75027	-3.43	-8.33	-7.46
O75127	-4.12	-7.78	-8.13
O75153	-3.84	-9.62	-8.26
O75208	-2.57	-6.12	-8.11
O75323	-3.84	-7.03	-7.49
O75380	-3.98	-5.59	-6.89
O75390	-4.02	-8.04	-10.39
O75394	-2.53	-5.25	-7.33
O75431	-3.57	-7.69	-10
O75439	-2.55	-8.01	-9.2
O75521	-4.64	-6.7	-8.83
O75570	-2.9	-7.42	-8.3
O75600	-4.32	-8.65	-11.11
O75616	-5.53	-7.36	-9.5
O75648	-3.6	-9.01	-10.36
O75746	-3.99	-9.18	-9.23
O75751	-6.54	-9.29	-7.17
O75807	-1.5	-5.26	-6.76
O75879	-4.23	-8.56	-7.3
O75880	-3.87	-6	-7.66
O75947	-3.68	-6.9	-6.35
O75964	-2.95	-5.63	-6.57
O76031	-2.99	-8.73	-10.1
O76095	-3.33	-6.13	-7.35
O94763	-4.09	-6.57	-6.95
O94778	-3.6	-7.17	-8.29
O94826	-3.36	-8.03	-7.27
O94925	-4.57	-8.24	-7.25
O95139	-4.19	-6.23	-7.02
O95140	-3.7	-7.03	-7.18
O95153	-4.52	-7.04	-6.01
O95167	-4.49	-6.07	-6.88
O95168	-2.41	-5.68	-6.28
O95169	-3.86	-6.98	-7.48
O95182	-3.42	-6.36	-6.67
O95202	-4.19	-7.06	-7.87
O95258	-4.24	-9.12	-11.72
O95292	-3.64	-7.17	-8.05
O95298	-1.88	-6.28	-7.02
O95299	-4.61	-7.81	-9.58
O95363	-3.73	-10.07	-10.64
O95389	-4.4	-7.15	-7.95
O95563	-2.52	-6.13	-6.78
O95571	-5.21	-8.25	-9.09
O95573	-5.43	-9.42	-8.23
O95822	-3.85	-8.36	-10.16
O95847	-4.41	-8.87	-9.7
O95865	-5.99	-8.58	-12.87
O95900	-1.92	-7.46	-8.97
O96000	-3.33	-7.4	-6.54
O96008	-4.32	-9.21	-8.88
P00156	-4.84	-10.85	-10.93
P00395	-2.32	-7.93	-9.69
P00403	-2.65	-7.47	-8.94
P00414	-2.26	-7.75	-8.4
P00441	-3.44	-7.01	-9.05
P00480	-4.14	-8.22	-11.25
P00519	-5.31	-8.18	-7.46
P00846	-3.05	-8.25	-7.42
P00973	-4.04	-8.4	-9.57
P02760	-4.06	-6.97	-7.12
P04049	-7.13	-8.35	-7.49
P04150	-4.53	-7.52	-7.75
P04179	-3.97	-6.17	-7.97
P04181	-4.11	-7.73	-9.96
P04637	-4.82	-7.3	-7.8
P04818	-4	-10.15	-10.06
P05108	-5.1	-10.44	-11.03
P05141	-4.41	-9.98	-9.67
P05165	-4.27	-10.07	-8.07
P05166	-3.91	-8.13	-9.84
P05186	-3.27	-8.73	-9.36
P05496	-1.93	-7.75	-7.34
P06401	-4.2	-7.93	-8.41
P06493	-3.97	-7.55	-8.9
P06576	-4.26	-6.36	-10.36
P07900	-2.55	-10.01	-7.15
P07919	-2.44	-5.4	-6.68
P07954	-3.31	-8.5	-7.28
P08253	-4.9	-9.1	-10.62
P08559	-2.79	-6.91	-8.01
P08574	-4.7	-7.77	-6.79
P09001	-3.14	-7.91	-8.04
P09211	-3.06	-8	-9.01
P09769	-3.98	-8.93	-9.9
P09936	-3.54	-8.42	-9.67
P0C0E4	-3.59	-7.45	-7.45
P0C7M7	-7.33	-9.89	-8.2
P0C7P0	-2.91	-6.88	-8.01
P0C869	-3.49	-7.96	-8.35
P0CG47	-3.02	-5.73	-6.43
P0CG48	-4.25	-6.53	-6.57
P0DPI2	-4.91	-7.22	-8.32
P10109	-2.25	-6.2	-7.99
P10415	-2.65	-8.21	-8.68
P10515	-4.23	-8.13	-7.23
P10606	-5.58	-7.95	-8.65
P10620	-2.29	-5.31	-6.95
P10809	-5.85	-9.45	-8.49
P10909	-4.23	-8.59	-7.66
P11177	-3.42	-7.05	-8.47
P11182	-5	-7	-8.67
P11233	-6.06	-8.99	-9.46
P11310	-4.2	-8.61	-8.9
P11498	-3.72	-8.99	-8.44
P12235	-3.36	-9.53	-10.07
P12236	-3.45	-9.03	-11.03
P12277	-4.44	-9.94	-12.03
P12532	-4.4	-9.39	-12.01
P12694	-2.13	-8.2	-9.26
P12931	-3.79	-9.85	-10.95
P13051	-2.81	-8	-7.98
P13073	-2.37	-6.46	-6.57
P13196	-2.38	-7.36	-10.13
P13804	-4.47	-8.63	-9.68
P14317	-2.76	-6.96	-7.84
P14373	-4.47	-7.93	-6.19
P14406	-3.17	-6.5	-6.01
P14555	-3.9	-7.62	-9.16
P14854	-3.71	-6.46	-7.28
P14927	-2.15	-6.38	-7.45
P15104	-3.87	-9.58	-8.8
P15538	-3.82	-10.01	-11.94
P16219	-4.36	-9.33	-10.13
P16260	-4.82	-8.49	-10.41
P16615	-5.21	-9	-7.89
P17152	-2.22	-6.55	-6.23
P17252	-4.92	-8.37	-8.19
P17540	-6.67	-11.03	-12.13
P17568	-4.16	-6.32	-9.03
P17612	-3.33	-8.68	-8.7
P19099	-4.27	-9.64	-11.86
P19367	-3.2	-8.64	-9.45
P19793	-4.91	-7.23	-7.55
P20674	-3.93	-7.04	-7.54
P21397	-4.31	-8.16	-9.81
P21554	-3.96	-8.24	-8.75
P21796	-5.27	-9.19	-8.59
P21912	-3.34	-7.83	-10.52
P21953	-4.95	-7.6	-8.09
P21980	-4.85	-8.11	-7.8
P22033	-5.74	-9.96	-11.07
P22307	-5.03	-8.1	-7.7
P22314	-3.97	-9.03	-10.02
P22557	-2.59	-8.68	-10.58
P22695	-4.08	-7.45	-8.76
P22736	-3.33	-8.37	-8.21
P22830	-4.46	-7.43	-8.9
P23297	-2.68	-5.4	-7.1
P23378	-4.31	-8.04	-8.85
P23396	-3.68	-7.13	-8.62
P23434	-2.77	-6.06	-7.62
P23443	-3.06	-8.75	-9.39
P23786	-2.68	-9.26	-10.96
P24310	-2.97	-5.86	-5.88
P24539	-1.9	-5.69	-5.23
P24752	-2.68	-7.43	-8.46
P25325	-2.51	-7.58	-10.06
P25705	-3.62	-9.43	-10.78
P25874	-2.35	-7.98	-7.07
P26440	-4.45	-7.66	-9.99
P27144	-5.13	-8.29	-10.55
P27338	-4.23	-10.76	-12
P27695	-2.97	-7.28	-9.57
P28330	-3.37	-10.01	-11.87
P29353	-4.48	-7.82	-7.83
P29372	-4.31	-8.25	-9.32
P29375	-6.18	-8.17	-7.02
P29590	-2.87	-7.78	-6.14
P29803	-2.97	-7.03	-7.76
P30044	-3.9	-7.1	-8.66
P30048	-2.49	-7.31	-7.09
P30049	-3.88	-5.6	-8.26
P30084	-5.83	-8.71	-9.84
P30405	-2.66	-8.46	-8.92
P30520	-4.23	-10.45	-12.7
P31040	-4.43	-8.7	-12.32
P31327	-5.09	-10.21	-10.89
P31415	-3.76	-8.9	-10.15
P31689	-3.42	-5.83	-7.19
P31930	-3.28	-7.93	-9.83
P32189	-2.9	-10.16	-10.95
P33121	-3.31	-9.21	-7.98
P33316	-3.49	-7.55	-7.03
P33897	-3.97	-7.01	-6.58
P34897	-2.98	-7.76	-10.1
P35218	-5.64	-7.68	-8.03
P35232	-2.7	-6.91	-8.52
P35557	-2.54	-8.85	-10.59
P35670	-4.44	-8.11	-6.58
P35914	-4.15	-8.87	-9.38
P36404	-3.58	-8.35	-8.07
P36542	-1.67	-7.26	-8.23
P36551	-4.63	-9.94	-11.67
P36639	-7.41	-9.41	-10.81
P36776	-3.36	-10.01	-8.79
P36873	-4.38	-7.06	-9.59
P36957	-3.63	-7.38	-7.49
P36969	-4.9	-7.31	-8.82
P38117	-3.25	-8.42	-7.66
P38646	-4.07	-7.36	-7.25
P39210	-3.48	-6.21	-7.83
P39748	-5.28	-8.89	-9.55
P41220	-4.59	-6.51	-7.7
P41247	-3.51	-10.86	-11.25
P41250	-5.02	-9.6	-8.2
P42126	-4.36	-7.94	-9.38
P42345	-3.55	-7.78	-7.21
P42704	-4.72	-9.02	-7.79
P42765	-3.58	-8.16	-9.49
P43155	-3.85	-10.21	-10.91
P43304	-3.62	-9.47	-7.6
P43897	-3.63	-7.54	-8.01
P45880	-4.08	-8.48	-8.54
P45954	-2.63	-9.98	-11.33
P46199	-4.86	-8.82	-7.13
P47985	-3.98	-6.77	-8.49
P48047	-3.54	-6.66	-7.6
P48201	-1.41	-7.44	-7.1
P48454	-5.02	-7.28	-8.79
P48651	-5.22	-9.11	-10.23
P48728	-5.56	-7.31	-10.96
P49281	-2.37	-6.72	-7.31
P49406	-5.75	-8.32	-9.32
P49411	-4.47	-7.48	-11.15
P49590	-3.79	-10.95	-7.63
P49662	-3.32	-7.69	-7.53
P49675	-4.05	-7	-8.59
P49748	-3.69	-9.94	-11.57
P49753	-4.48	-6.79	-8.31
P49789	-3.18	-8.65	-9.39
P49916	-5.69	-9.77	-7.6
P50336	-7.23	-8.19	-10.63
P50416	-4.1	-8.73	-10.41
P50440	-4.02	-7.93	-7.71
P50747	-4.53	-9.82	-8.95
P51149	-3.45	-9.42	-9.88
P51398	-4.32	-10.29	-10.16
P51530	-4.73	-8.95	-10.15
P51553	-3.88	-9.2	-9.69
P51572	-1.98	-6.95	-7.25
P51687	-3.69	-8.12	-7.72
P51970	-3.21	-6.8	-7.72
P52306	-3.3	-6.65	-7.59
P52758	-2.78	-7.01	-7.41
P52789	-4.04	-8.8	-8.93
P52815	-3.94	-5.5	-7.68
P53007	-3.8	-7.82	-6.79
P53370	-7.32	-7.71	-9.34
P53597	-4.9	-9.33	-9.92
P53618	-3.78	-7.1	-7.62
P53701	-3.57	-8.07	-9.99
P53778	-5.55	-8.08	-8.9
P53779	-3.66	-8.1	-9.68
P53816	-3.54	-6.66	-7.6
P54098	-3.81	-8.42	-8.39
P54819	-3.96	-12.58	-13.3
P54868	-4.98	-8.7	-8.68
P55084	-4.02	-6.09	-8.76
P55789	-3.14	-9.19	-10.33
P55809	-3.22	-8.62	-10.63
P55851	-1.89	-6.37	-5.57
P55916	-3.99	-6.92	-5.87
P55957	-3.83	-5.55	-8.05
P56277	-2.72	-6.66	-6.97
P56381	-3.29	-6.38	-7.63
P56556	-5.55	-7.97	-9.82
P56693	-4.89	-6.93	-8.64
P56962	-2.8	-7.48	-7.25
P57103	-4.05	-8.49	-6.64
P57105	-1.83	-7.17	-8.26
P57764	-5.06	-7.92	-10.69
P59047	-4.57	-8.32	-7.6
P61221	-6.36	-8.9	-8.37
P61604	-6.35	-5.46	-8.23
P63167	-4.58	-6.58	-8.01
P78540	-3.48	-7.58	-8.08
P78549	-3.61	-8.44	-10.95
P80404	-4.51	-7.77	-9.58
P82650	-3.54	-7.46	-8.63
P82663	-2.4	-7.35	-6.48
P82664	-3.99	-5.72	-7.61
P82673	-2.94	-7.38	-7.35
P82675	-5.53	-7.54	-7.26
P82912	-3.33	-6.14	-7.88
P82914	-2.67	-7.48	-6.97
P82921	-2.92	-6.28	-8.07
P82930	-4.05	-7.17	-8.81
P82932	-3.67	-7.16	-7.17
P82933	-3.69	-7.4	-7.57
P83111	-4.27	-8.76	-10.65
P86397	-4.61	-6.22	-8.2
P99999	-2.96	-7.36	-9.23
Q00005	-7.03	-10.48	-9.87
Q00059	-4.22	-7.27	-6.93
Q00325	-1.43	-8.95	-9.8
Q00G26	-3.51	-7.46	-5.81
Q02127	-3.76	-8.14	-11.16
Q02218	-4.27	-8.14	-8.82
Q02318	-5.18	-9.56	-10.33
Q02790	-4.42	-7.73	-6.38
Q02978	-3.15	-8.16	-10.09
Q04837	-2.9	-5.33	-7.68
Q05655	-4.25	-8.78	-7.13
Q05823	-4.5	-8.7	-8.9
Q05932	-4.45	-8.72	-10.91
Q06055	-1.67	-7.2	-6.93
Q06609	-4.36	-8.67	-8.51
Q07021	-5.06	-7.62	-9.81
Q07812	-2.41	-6.43	-8.24
Q07817	-4.24	-6.74	-8.84
Q07820	-3.36	-6.68	-7.47
Q07973	-4	-8.17	-10.21
Q08AH1	-4.06	-9.56	-7.58
Q08AH3	-3.26	-10.19	-7.5
Q08J23	-2.7	-8.31	-11.24
Q09013	-3.68	-10.2	-10.7
Q10713	-4.21	-9.06	-10.06
Q12849	-4	-7.43	-6.45
Q12887	-2.93	-9.97	-9.48
Q12931	-5.1	-9.1	-10.36
Q12981	-2.62	-7.09	-7.1
Q13011	-1.71	-7.4	-8.14
Q13057	-3.44	-10.24	-9.95
Q13084	-2.92	-8.61	-8.91
Q13114	-3.67	-8.21	-4.89
Q13148	-4.37	-7.01	-7.43
Q13268	-2.92	-9.94	-11.91
Q13405	-3.64	-7.1	-8.2
Q13472	-4.85	-9.26	-8.17
Q13505	-4.3	-7.04	-9.35
Q13637	-4.68	-7.85	-9.36
Q13686	-3.95	-7.69	-7.96
Q13825	-4.52	-8.48	-9.28
Q14142	-3.66	-7.76	-5.99
Q14154	-3.89	-6.5	-8.45
Q14197	-2.33	-6.28	-6.51
Q14249	-4.89	-7.99	-9.01
Q14296	-3.45	-8.12	-7.5
Q14318	-3.68	-6.36	-7.94
Q14397	-4.39	-8.65	-7.48
Q14409	-4.61	-10.42	-10.07
Q14410	-4.45	-9.48	-10.34
Q14457	-4.67	-6.71	-8.33
Q14653	-4.14	-7.8	-8.84
Q14667	-4.52	-8.39	-6.05
Q14689	-4.66	-9.12	-9.93
Q14CZ7	-2.24	-7.87	-8.1
Q15031	-7.16	-10.07	-8.14
Q15046	-3.41	-9.6	-9.24
Q15070	-3.15	-7.98	-8.46
Q15118	-4.95	-9.61	-10
Q15119	-4.27	-9.71	-10.04
Q15120	-2.65	-9.51	-11.36
Q15303	-5.94	-8.55	-8.57
Q15311	-3.4	-7.81	-7.35
Q15388	-2.83	-6.05	-6.93
Q15526	-3.6	-7.09	-9.78
Q15785	-3.71	-7.44	-7.54
Q15831	-2.19	-7.62	-9.58
Q16134	-3.4	-11.11	-12.76
Q16540	-4.69	-6.73	-8.2
Q16595	-5.26	-7.03	-8.14
Q16611	-1.86	-6.44	-7.96
Q16635	-5.4	-9.98	-12.63
Q16654	-4.57	-9.64	-9.59
Q16718	-3.61	-7.04	-7.3
Q16740	-3.45	-7.39	-6.98
Q16762	-2.32	-8.16	-7.78
Q16775	-4.18	-7.93	-10.21
Q16795	-3.82	-10.14	-11.37
Q16822	-4.27	-7.94	-9.87
Q16854	-4.16	-9.42	-10.37
Q16891	-3.26	-7.16	-7.45
Q2TB90	-4.08	-9.08	-9.11
Q2VYF4	-3.94	-6.6	-8.85
Q32NB8	-3.84	-9.71	-11.01
Q32P41	-4.7	-7.79	-8.76
Q330K2	-3.27	-8.95	-9.87
Q3KQZ1	-3.19	-7.56	-10.03
Q3KRB8	-3.03	-6.2	-8.92
Q3MIT2	-3.3	-8.44	-9.17
Q3SXM5	-3.89	-10.59	-11.71
Q3ZCQ8	-3.17	-7.26	-8.47
Q494U1	-3.81	-6.79	-7.45
Q49AM1	-2.61	-5.15	-7.79
Q49B96	-3.73	-5.37	-6.91
Q4G0S4	-4.42	-9.09	-10.16
Q4G176	-3.97	-8.96	-8.79
Q4U2R6	-3.96	-5.62	-8.06
Q53FZ2	-4.06	-9.82	-8.25
Q53H12	-5.22	-9.13	-8.21
Q53H82	-3.75	-6.82	-9.39
Q53R41	-3.71	-9.68	-9.96
Q53S33	-5.13	-7.53	-7.77
Q53S58	-3.71	-8.29	-8.55
Q562E7	-7.17	-9.55	-7.45
Q567V2	-2.47	-9.85	-12.07
Q587J8	-2.31	-6.93	-8.39
Q5BJD5	-4.88	-8.57	-9.22
Q5EBM0	-3.72	-10.04	-11.1
Q5H9E4	-3.86	-9.53	-11.28
Q5HYI7	-4.19	-7.24	-8.07
Q5HYK3	-2.62	-8.77	-7.62
Q5JPH6	-4.08	-9.35	-8.92
Q5JRX3	-3.83	-9.07	-8.98
Q5JTJ3	-1.98	-6.99	-6.59
Q5JTZ9	-4.63	-9.42	-7.66
Q5K4L6	-5.27	-9.57	-8.42
Q5S007	-5.25	-9.01	-7.19
Q5ST30	-2.73	-8.42	-9.49
Q5SVS4	-3.05	-7.52	-6.71
Q5SXM8	-3.01	-6.36	-7.13
Q5T160	-2.95	-8.23	-8.28
Q5T1C6	-3.89	-7.27	-9.46
Q5T2R2	-4.54	-8.53	-9.6
Q5T440	-4.87	-8.14	-9.09
Q5T653	-3.02	-6.84	-8.81
Q5T890	-2.49	-8.23	-8.19
Q5T9A4	-3.3	-7.47	-9.82
Q5T9G4	-5.88	-7.79	-8.35
Q5TC12	-4.07	-6.88	-9.27
Q5TEU4	-3.82	-8.48	-8.17
Q5TYM5	-3.9	-8.07	-10.08
Q5U5X0	-3.85	-8.63	-9.23
Q5VT66	-4.96	-8.65	-10.66
Q5VTU8	-3.23	-6.22	-8.27
Q63ZY3	-2.97	-7.45	-8.26
Q66K74	-3.26	-8.75	-8.31
Q68CK6	-4.57	-10.86	-12.43
Q68DD2	-3.2	-7.59	-9.09
Q6DKK2	-2.42	-7.64	-8.71
Q6FI81	-3.77	-7.4	-8.94
Q6GPH4	-2.67	-5.55	-6.09
Q6IB77	-3.85	-9.42	-9.69
Q6IC98	-4.87	-7.23	-7.75
Q6ICL3	-2.44	-9.1	-10.15
Q6IMN6	-3.03	-7	-6.39
Q6IN84	-4.99	-6.98	-8.57
Q6IPR1	-5.33	-8.85	-8.42
Q6J4K2	-3.45	-8.27	-8.07
Q6KCM7	-4.68	-9.81	-7.9
Q6L8Q7	-6.03	-9.07	-8.58
Q6NUI2	-4.62	-8.39	-10.5
Q6NUK1	-4.31	-8.38	-7.84
Q6NUN0	-5.35	-8.45	-10.14
Q6NVY1	-3.74	-7.65	-8.95
Q6P087	-4.43	-8.76	-11.35
Q6P161	-2.96	-6.06	-8.36
Q6P1L8	-5.02	-7.73	-9.52
Q6P1Q0	-3.84	-9.19	-9.66
Q6P444	-3.43	-6.95	-7.33
Q6P461	-4.9	-10.49	-10.17
Q6P4A7	-3.44	-7.11	-6.48
Q6P4F2	-3.81	-7.3	-7.69
Q6P4H8	-4.12	-7.24	-8.55
Q6P587	-4.85	-6.77	-9.62
Q6P597	-3.02	-7.51	-8.2
Q6PI48	-4.5	-10.2	-11.25
Q6PI78	-3.26	-6.87	-6.85
Q6PIV7	-4.71	-8.45	-9.56
Q6PML9	-3.63	-8.86	-8.33
Q6UB28	-5.25	-7.77	-9.05
Q6UB35	-5.89	-9.02	-9.7
Q6UX06	-3.91	-7.69	-8.18
Q6UXN7	-3.4	-6.38	-7.24
Q6UXV4	-2.92	-4.45	-6.01
Q6YFQ2	-3.4	-6.89	-7.19
Q6ZT89	-4.36	-8.11	-6.23
Q709F0	-4.08	-10.28	-10.45
Q70CQ3	-2.41	-8.49	-8.68
Q70HW3	-3.43	-8.6	-9.25
Q76B58	-4.21	-8.19	-8.1
Q7KZN9	-3.96	-9.89	-10.79
Q7L0Y3	-3.6	-8.42	-7.52
Q7L2E3	-4.35	-8.11	-7.19
Q7L311	-3.09	-6.46	-7.34
Q7L3T8	-4.46	-6.5	-7.69
Q7L3V2	-3.19	-6.47	-7.96
Q7L4E1	-4.49	-8.99	-10.13
Q7L592	-3.59	-9.12	-11.44
Q7L5Y1	-4.98	-8.16	-9.01
Q7L7V1	-4.8	-9.44	-9.66
Q7L8L6	-2.84	-6.97	-9.88
Q7Z2W9	-2.53	-6.84	-6.22
Q7Z3C6	-4.6	-9.2	-9.24
Q7Z3D6	-4.69	-9.24	-10.98
Q7Z419	-4.31	-7.92	-8.19
Q7Z434	-3.12	-6.05	-6.96
Q7Z4T9	-3.32	-6.31	-5.97
Q7Z4Y8	-1.93	-5.62	-5.91
Q7Z6M4	-2.95	-6.69	-7.95
Q7Z7F7	-4.3	-6.86	-7.84
Q7Z7H8	-4.01	-7.34	-8.09
Q7Z7K0	-1.91	-6.99	-7.12
Q86SH2	-3.8	-7.51	-8.88
Q86SX6	-2.91	-5.03	-7.31
Q86TL0	-2.81	-7.78	-8.1
Q86TS9	-2.41	-5.84	-5.81
Q86U28	-4.25	-7.31	-7.61
Q86U90	-4.93	-9.67	-11.34
Q86UB9	-4.67	-8.14	-8.85
Q86UD5	-2.24	-8.66	-8.2
Q86UT6	-4.26	-8.11	-7.79
Q86VD7	-3.04	-7.89	-9.43
Q86VP1	-3.12	-5.99	-6.99
Q86VP3	-3.4	-7.42	-7.88
Q86W56	-3.26	-7.85	-10.25
Q86WG3	-3.11	-7.86	-6.95
Q86WU2	-4.75	-8.27	-12.62
Q86WV6	-5.19	-8.29	-7.35
Q86X76	-3.6	-9.06	-10.43
Q86XE3	-4.99	-7.9	-10.47
Q86XE5	-3.04	-8.96	-9.84
Q86Y07	-4.15	-7.55	-9.09
Q86Y39	-3.01	-8.16	-7.88
Q86YB7	-3.81	-8.39	-9.85
Q86YH6	-3.58	-7.21	-8.27
Q86YT6	-5.12	-7.87	-6.82
Q8IUC6	-4.74	-8.61	-8.54
Q8IUX1	-1.88	-6.69	-6.06
Q8IUZ5	-3.93	-8.38	-9.9
Q8IVG5	-6.12	-10.49	-7.54
Q8IVH4	-3	-7.23	-7.37
Q8IVS2	-5.23	-7.94	-8.82
Q8IVS8	-4.61	-7.57	-8.41
Q8IW03	-4.89	-7.49	-8.85
Q8IWA4	-3.2	-9.71	-7.46
Q8IWA5	-3.36	-8.19	-7.87
Q8IWL3	-2.54	-7.47	-8.2
Q8IWW8	-5.15	-11.37	-12.84
Q8IXI1	-4.34	-7.01	-8.63
Q8IXI2	-5.07	-9.89	-9.64
Q8IXL7	-2.84	-7.56	-7.88
Q8IXM3	-2.78	-6.38	-6.83
Q8IXQ9	-4.17	-6.55	-10.45
Q8IYB8	-4.53	-9.72	-9.4
Q8IYU8	-4.35	-6.17	-8.77
Q8IZ52	-4.59	-8.84	-8.26
Q8IZJ6	-4.7	-8.91	-9.19
Q8N0V3	-3.72	-6.88	-8.6
Q8N0X4	-4.25	-8.81	-9.92
Q8N0Z6	-4.21	-8.44	-9.2
Q8N159	-4.15	-9.05	-8.23
Q8N183	-3.85	-6.63	-7.06
Q8N1Q8	-4.5	-7.98	-8.76
Q8N2A8	-2.49	-7.48	-8.09
Q8N2F6	-2.49	-7.1	-8.21
Q8N2H3	-3.46	-8.61	-12.17
Q8N357	-4.85	-8.99	-11
Q8N3J2	-4.69	-9.78	-9.95
Q8N3J5	-4.29	-7.65	-8.35
Q8N3R3	-4.76	-7.27	-7.51
Q8N413	-3.11	-7.44	-7.97
Q8N442	-3.97	-7.69	-9.48
Q8N465	-3.65	-8.87	-12.29
Q8N490	-5.04	-8.18	-10.09
Q8N4E7	-2.98	-7.21	-8.35
Q8N4Q1	-2.58	-6.11	-6.82
Q8N573	-5.41	-7.53	-7.44
Q8N5K1	-4.74	-7.92	-8.61
Q8N5M1	-4.38	-5.93	-7.97
Q8N5N7	-2.76	-6.07	-8.33
Q8N5S1	-3.08	-8.45	-9.88
Q8N5Z0	-3.33	-7.77	-8.18
Q8N6R0	-4.79	-8.91	-10.72
Q8N8Q8	-2.09	-8.72	-9.9
Q8N8R3	-2.87	-8.86	-9.03
Q8N8R5	-4.16	-7.93	-7.96
Q8N983	-5.04	-7.49	-7.46
Q8N9F0	-3.09	-9.9	-10.95
Q8NAN2	-5	-9.29	-10.14
Q8NAT2	-3.81	-8.81	-6.9
Q8NB90	-5.48	-7.57	-9.14
Q8NBQ7	-4.56	-10.16	-11.61
Q8NBU5	-3.13	-8.58	-11.2
Q8NC60	-5.43	-8.46	-10.28
Q8NCN5	-3.57	-10.21	-11.94
Q8NCR3	-2.45	-7.27	-7.91
Q8ND71	-6.02	-10.21	-9.98
Q8NE62	-3.32	-12.38	-13.7
Q8NE86	-5.01	-6.2	-7.07
Q8NEJ0	-4.84	-6.17	-8.63
Q8NEN9	-4.55	-7.82	-6.82
Q8NEW0	-3.22	-6.76	-7.19
Q8NFF5	-5.85	-7.72	-9.66
Q8NHU6	-4.25	-6.77	-6.76
Q8NI37	-4.66	-8.18	-8.03
Q8NI60	-4.38	-9.05	-7.89
Q8TAA5	-4.07	-6.51	-8.51
Q8TAE8	-1.7	-5.85	-5.63
Q8TB36	-3.88	-9.3	-10.34
Q8TBG4	-3.78	-8.1	-9.74
Q8TBP6	-4.72	-8.08	-9.85
Q8TC71	-4.61	-7.32	-6.17
Q8TCC3	-3.61	-7.04	-8.37
Q8TCG5	-3.27	-9.92	-10.32
Q8TCS8	-4.92	-8.84	-9.12
Q8TD22	-2.34	-6.9	-9.44
Q8TEB9	-4.33	-7.81	-9.26
Q8WUK0	-2.4	-7.04	-8.14
Q8WUT9	-3.69	-7.89	-8.25
Q8WV60	-4.43	-6.75	-8.44
Q8WV74	-4.95	-7.98	-10.51
Q8WV93	-2.76	-6.59	-7.81
Q8WVM0	-2.76	-6.5	-8.77
Q8WWC4	-5.68	-6.78	-9.54
Q8WWI5	-3.62	-8.91	-7.52
Q8WWR8	-5.12	-8.58	-10.76
Q8WWV3	-5.7	-9.86	-11.16
Q8WXG1	-4.92	-7.13	-10.83
Q8WXI4	-3.93	-8.12	-8.83
Q92499	-4.23	-7.99	-7.21
Q92523	-3.39	-8.29	-11.83
Q92552	-4.12	-8.36	-8.84
Q92665	-2.4	-6.39	-8.23
Q92667	-3.88	-7.22	-6.68
Q92843	-4.41	-6.48	-7.99
Q92876	-6.63	-8.34	-9.93
Q92947	-4.69	-9.2	-10.28
Q969M1	-3.18	-8.92	-8.19
Q969P6	-3.98	-8.21	-8.55
Q969S9	-3.27	-8.65	-7.57
Q969V5	-2.51	-6.76	-6.73
Q969Y2	-3.01	-7.66	-8.79
Q969Z0	-2.32	-8.71	-7.53
Q969Z3	-3.39	-6.72	-8.63
Q96A35	-3.17	-6.81	-6.73
Q96A46	-3.85	-7.79	-9.12
Q96AG3	-3.27	-8.81	-8.42
Q96AQ8	-2.03	-5.4	-5.1
Q96BP2	-3.96	-7.9	-6.68
Q96BR5	-3.49	-7.52	-8.04
Q96BW9	-4.58	-8.66	-10.09
Q96BY2	-5.03	-7.06	-7.12
Q96C03	-4.87	-8.68	-10.38
Q96CB9	-4.37	-8.1	-10.97
Q96CM3	-5.39	-8.71	-10.13
Q96CM8	-4.08	-8.78	-7.51
Q96CQ1	-3.98	-8.78	-9.7
Q96CU9	-4.6	-9.84	-12.06
Q96D53	-4.33	-9.7	-10.29
Q96DA6	-3.84	-7.08	-8.2
Q96DC8	-3.07	-8.31	-10.09
Q96DP5	-3.16	-8.48	-9.76
Q96DU9	-4.45	-8.48	-8.45
Q96DV4	-1.62	-7.61	-9.49
Q96DW6	-3.39	-7.01	-9.06
Q96DX5	-3.32	-8.44	-8.01
Q96E11	-4.07	-7.31	-8.89
Q96E29	-3.99	-6.58	-8.83
Q96E52	-4.06	-9.11	-9.71
Q96ED9	-3.82	-7.06	-7.75
Q96EH3	-4.1	-6.8	-8.86
Q96EL2	-3.08	-6.95	-8.29
Q96EL3	-3.43	-6.26	-7.14
Q96EY1	-4.28	-6.64	-7.25
Q96EY7	-2.61	-7.2	-8.6
Q96EY8	-5.12	-6.83	-7.69
Q96F15	-2.24	-9.25	-10
Q96GC5	-3.55	-6.68	-7.49
Q96GF1	-3.6	-5.97	-7.5
Q96GJ1	-2.97	-8.4	-10.11
Q96GW9	-4.8	-9.12	-10.73
Q96GZ6	-2.57	-7.51	-6.19
Q96H55	-4.24	-8.96	-6.37
Q96H78	-2.82	-9.41	-9.92
Q96H96	-4.18	-10.29	-10.42
Q96HJ9	-2.72	-6.29	-7.39
Q96HS1	-3.41	-7.61	-9.01
Q96HY7	-5.73	-9.48	-9.17
Q96I23	-3.57	-6.45	-8.01
Q96I51	-3.66	-9.64	-11.58
Q96I59	-4.1	-8.96	-8.66
Q96I99	-4.75	-9.6	-10.7
Q96IL0	-3.71	-8.45	-8.56
Q96IR7	-4.93	-7.45	-8.9
Q96JX3	-4.35	-9.1	-10.99
Q96KJ9	-2.48	-6.16	-6.07
Q96KR6	-2.48	-7.26	-6.71
Q96LL9	-2.53	-5.97	-7.75
Q96LU5	-3.05	-6.55	-8.39
Q96LW4	-4.53	-7.41	-7.4
Q96LW7	-3.32	-6.01	-7.71
Q96LZ3	-3.1	-6.71	-7.99
Q96MF6	-2.59	-10.38	-8.62
Q96N28	-1.9	-8.22	-9.53
Q96N66	-2.83	-9.3	-10.2
Q96NB2	-1.27	-8.13	-9.81
Q96ND0	-3.6	-7.29	-7.06
Q96NN9	-3.97	-8.95	-9.63
Q96P20	-4.84	-9.43	-7.89
Q96PE7	-5.77	-7.71	-9.75
Q96PN6	-5.63	-9.43	-7.45
Q96Q11	-4.72	-8.66	-8.31
Q96QE5	-5.59	-7.98	-7.36
Q96RP9	-3.38	-7.46	-7.92
Q96RQ3	-3.57	-10.16	-7.69
Q96RR1	-4.25	-8.93	-11.39
Q96S66	-3.28	-5.65	-7.34
Q96SZ6	-5.13	-9.7	-9.73
Q96T21	-3.08	-6.22	-8.55
Q96T52	-4.64	-7.68	-9.5
Q96T66	-2.31	-8.37	-10.52
Q96TA2	-4.48	-8.92	-8.33
Q96TC7	-3.85	-9	-10.46
Q99417	-1.24	-6.73	-5.99
Q99497	-2.99	-5.8	-8.12
Q99527	-3.14	-9.71	-6.45
Q99536	-4.14	-7.61	-8.62
Q99551	-2.49	-6.88	-8.05
Q99595	-1.73	-7.44	-8.03
Q99623	-2.52	-6.5	-7
Q99643	-3.98	-5.49	-6.48
Q99717	-4.06	-7.64	-9.07
Q99757	-4.68	-5.72	-7.53
Q99766	-3.51	-6.19	-8.21
Q99797	-3.88	-7.87	-9.46
Q99798	-3.95	-7.31	-9.35
Q99807	-2.36	-8.14	-8.11
Q99933	-3.65	-6.75	-8.06
Q99942	-3.62	-6.07	-7.3
Q99972	-3.51	-6.97	-6.68
Q9BPX6	-3.13	-8.9	-8.24
Q9BQ52	-3.4	-10.08	-9.24
Q9BQ95	-5.11	-7.72	-9.32
Q9BQC6	-2.67	-6.46	-6.02
Q9BQD7	-5.99	-8.8	-10.4
Q9BQP7	-4.42	-8.41	-9.32
Q9BQT8	-4.03	-7.45	-10.51
Q9BRI3	-4.68	-7.84	-7.53
Q9BRJ2	-4.91	-7.78	-8.64
Q9BRT2	-3.61	-6.45	-6.75
Q9BSE5	-4.44	-7.71	-7.86
Q9BSF4	-3.08	-7.66	-8.24
Q9BSH4	-4.12	-7.8	-9.5
Q9BSK2	-2.96	-9.14	-9.94
Q9BSK4	-4.45	-8.13	-7.82
Q9BSU1	-4.94	-8.44	-8.46
Q9BSY4	-2.51	-6.71	-7.69
Q9BT17	-3.37	-10.63	-11.47
Q9BT30	-3	-6.79	-7.54
Q9BTU6	-6.45	-8.23	-9.58
Q9BU61	-2.75	-5.88	-7.84
Q9BUB7	-2.96	-7.07	-7.03
Q9BUE6	-6.53	-8.27	-9.49
Q9BUK0	-4.29	-8.01	-9.22
Q9BUK6	-3.64	-7.77	-8.23
Q9BUP0	-2.01	-5.9	-7.67
Q9BV23	-2.92	-8.17	-10.01
Q9BV35	-3.68	-8.29	-8.36
Q9BVG9	-3.62	-8.35	-9.36
Q9BVL4	-5.6	-9.46	-10.79
Q9BVS5	-3.22	-7.9	-8.68
Q9BVV7	-3.36	-6.54	-7.26
Q9BW91	-4.92	-8.49	-10.24
Q9BW92	-4.66	-9.96	-10.43
Q9BWL3	-3.52	-6.26	-7.48
Q9BWM7	-3.83	-8.37	-10.2
Q9BX68	-2.63	-7.27	-8.08
Q9BXF6	-3.65	-6.31	-5.93
Q9BXF9	-2.41	-6.19	-6.72
Q9BXI2	-2.72	-8.41	-9.08
Q9BXK5	-3.38	-7.4	-7.77
Q9BXM7	-3.77	-7.7	-9.3
Q9BXR0	-4.64	-8.7	-9.17
Q9BYC2	-6.09	-8.34	-9.13
Q9BYC8	-3.08	-6.97	-5.9
Q9BYC9	-1.31	-6.04	-6.74
Q9BYD1	-3.68	-7.19	-6.98
Q9BYD2	-4.82	-7.45	-6.88
Q9BYD3	-3.76	-7.36	-7.92
Q9BYD6	-5.04	-6.96	-9.32
Q9BYJ4	-4.69	-6.93	-6.7
Q9BYN8	-1.17	-5.2	-5.11
Q9BYT8	-3.67	-9.03	-9.53
Q9BYV1	-4.88	-7.18	-10.76
Q9BYV7	-5.13	-10.29	-12.66
Q9BYX4	-6.84	-8.54	-8.7
Q9BZ23	-3.66	-7.88	-12.5
Q9BZD2	-4.26	-9.51	-10.79
Q9BZE1	-2.83	-8.06	-9.77
Q9BZJ4	-2.89	-8.57	-9.01
Q9BZY9	-3.19	-6.79	-6.04
Q9C0C7	-4.74	-10.08	-11.58
Q9GZQ8	-4.76	-8.8	-9.98
Q9GZT3	-4.73	-6.96	-7.86
Q9GZT6	-1.13	-4.95	-5.61
Q9GZY4	-2.39	-5.96	-7.41
Q9H015	-1.75	-8.94	-10.19
Q9H061	-2.01	-7.12	-7.21
Q9H078	-3.62	-7.87	-8.04
Q9H0C2	-3.59	-9.76	-10.18
Q9H0R6	-3.8	-8.22	-8.22
Q9H0U6	-4.45	-7.3	-6.88
Q9H1A3	-5.08	-8.06	-9.73
Q9H1K1	-3.84	-5.86	-7.81
Q9H1K4	-3.04	-8.59	-7.39
Q9H2D1	-5.04	-9.94	-10.32
Q9H2K0	-4.26	-7.6	-6.43
Q9H2U1	-4.17	-8.57	-7.82
Q9H2U2	-3.32	-8.44	-10.18
Q9H2V7	-2.8	-7.95	-10.73
Q9H2W6	-2.64	-6.58	-7.14
Q9H300	-4.97	-9.45	-9.1
Q9H3H1	-4.85	-10.86	-7.41
Q9H3J6	-2.39	-5.88	-7.04
Q9H3K2	-4.04	-7.77	-9.54
Q9H3L0	-6.19	-6.99	-7.69
Q9H3P7	-3.37	-6.8	-6.01
Q9H4A6	-4.09	-6.7	-8.57
Q9H4B0	-5.17	-9.63	-11.13
Q9H4K7	-2.85	-8.32	-8.16
Q9H596	-3.85	-6.36	-8.22
Q9H5Q4	-3.68	-7.64	-8.76
Q9H611	-3.87	-9.06	-7.93
Q9H649	-4.04	-8.41	-10.19
Q9H6R3	-4.77	-8.92	-8.3
Q9H6U6	-5.53	-10.3	-11.27
Q9H773	-3.36	-8.08	-6.99
Q9H7D7	-4.61	-9.18	-8.73
Q9H7H0	-3.05	-7.4	-8.98
Q9H825	-3.82	-9.06	-11.03
Q9H845	-4.01	-8.64	-8.34
Q9H8K7	-3.8	-6.55	-7.87
Q9H8M1	-2.21	-5.87	-7.49
Q9H8Y5	-4.85	-8	-6.96
Q9H936	-2.66	-9.24	-10.83
Q9H974	-5.17	-9.2	-9.65
Q9H9B4	-3.41	-8.73	-11.17
Q9H9J2	-3.02	-7.53	-8.05
Q9H9P8	-6.12	-11.78	-13.79
Q9HA77	-4.38	-8.78	-7.72
Q9HA92	-3.46	-8.51	-9.55
Q9HAC7	-4.84	-8	-7.85
Q9HAP2	-3.16	-7.59	-8.17
Q9HAV7	-2.74	-6.37	-6.9
Q9HB07	-2.59	-8.13	-9.45
Q9HBF4	-5.58	-8.54	-7.8
Q9HBH1	-4.26	-8.79	-9.85
Q9HC21	-4.67	-8.49	-8.73
Q9HC29	-3.72	-10.54	-8.77
Q9HC36	-2.71	-8.28	-7.89
Q9HC38	-3.18	-7.46	-8.72
Q9HCC0	-5.3	-8	-10.2
Q9HCL2	-6.07	-9.19	-10.86
Q9HCM9	-4.49	-6.99	-5.71
Q9HD23	-2.57	-7.08	-7.81
Q9HD33	-4.16	-8.14	-8.18
Q9HD34	-4.5	-9.57	-9.68
Q9HD36	-2.66	-7.19	-8.12
Q9NP58	-4.94	-8.83	-6.93
Q9NP80	-3.8	-8.75	-9.89
Q9NP81	-2.53	-7.9	-10.19
Q9NP92	-3.91	-8.8	-8.49
Q9NPB1	-4.8	-8.9	-9.53
Q9NPE2	-2.19	-6.89	-6.89
Q9NPG2	-3.92	-7.01	-8.24
Q9NPH0	-4.06	-9.33	-8.99
Q9NPJ3	-2.07	-6.35	-8.38
Q9NPL8	-2.68	-6.69	-8.66
Q9NQ88	-4.93	-8.24	-10
Q9NQG6	-2.63	-9.88	-12.43
Q9NQH7	-3.94	-7.35	-10.5
Q9NQP4	-2.46	-7.03	-6.88
Q9NQZ5	-6.25	-9.23	-10.74
Q9NR28	-1.84	-6.7	-7.47
Q9NR30	-4.4	-8.09	-8.67
Q9NR71	-3.65	-8.11	-9.6
Q9NRA0	-2.5	-7.97	-9.85
Q9NRI5	-2.72	-7.29	-6.64
Q9NRK6	-2.8	-8.48	-7.74
Q9NRP2	-3.67	-6.74	-8.25
Q9NRP4	-2.87	-7.52	-8.07
Q9NRX2	-5.25	-6.46	-7.88
Q9NRY6	-3.91	-7.83	-7.62
Q9NS18	-4.84	-6.8	-7.91
Q9NSE4	-4.77	-8.36	-8.32
Q9NU23	-4.63	-9.48	-10.25
Q9NUB1	-5.05	-9.47	-8.05
Q9NUJ1	-6.52	-10.37	-10.7
Q9NUL7	-4.23	-8.09	-9.27
Q9NUM3	-2.46	-7.83	-6.42
Q9NUQ2	-4.14	-7.68	-9.62
Q9NUQ9	-2.19	-8.14	-8.42
Q9NUT2	-4.05	-8.9	-6.77
Q9NVA1	-3.84	-7.44	-7.64
Q9NVH0	-4.63	-8.2	-6.67
Q9NVH1	-5.59	-8.06	-7.11
Q9NVH6	-4.38	-7.37	-7.64
Q9NVI7	-3.5	-7.49	-9.48
Q9NVS2	-5.22	-6.77	-8.69
Q9NVT9	-4.01	-7.15	-6.72
Q9NVV4	-4.01	-9.26	-10.86
Q9NW81	-3.19	-7.58	-7.8
Q9NWQ9	-2.72	-6.44	-7.1
Q9NWR8	-2.88	-6.28	-6.21
Q9NWS8	-3.32	-7.09	-8.12
Q9NWU1	-3.38	-7.61	-8.37
Q9NWU5	-3.71	-7.63	-7.51
Q9NWX6	-2.16	-8.95	-8.67
Q9NX00	-1.97	-7.46	-6.6
Q9NX09	-3.82	-7.81	-7.87
Q9NX14	-1.97	-5.29	-6.92
Q9NX18	-5.28	-8.2	-8.11
Q9NX20	-4.06	-8.06	-8.68
Q9NX46	-3.01	-7.67	-9.44
Q9NX47	-5.25	-7.18	-6.06
Q9NX63	-2.4	-5.58	-6.29
Q9NYJ1	-3.24	-5.74	-8.71
Q9NYK5	-2.98	-7.36	-8.4
Q9NYY8	-3.41	-7.04	-7.78
Q9NYZ2	-3.13	-7.23	-7.37
Q9NZ45	-6.19	-7.77	-9.78
Q9NZA1	-4.38	-7.71	-8.69
Q9NZC7	-3.77	-8.45	-9.2
Q9NZE8	-2.95	-7.55	-8.34
Q9NZJ6	-4.17	-9.75	-10.29
Q9NZJ7	-1.29	-8.77	-8.33
Q9P015	-3.45	-6.88	-7.75
Q9P032	-5	-6.32	-6.21
Q9P0J0	-4.2	-7.8	-6.6
Q9P0J1	-3.84	-8.06	-8.59
Q9P0M9	-3	-6.83	-6.91
Q9P0P8	-3.41	-6.3	-7.62
Q9P286	-4.35	-8.21	-8.54
Q9P291	-2.47	-7.29	-8.7
Q9P2E3	-5.16	-8.45	-8
Q9P2H5	-5.5	-7.22	-7.78
Q9P2J9	-5.24	-7.94	-8.66
Q9P2R7	-4.24	-8.91	-9.73
Q9UBF8	-4.77	-8.77	-8.95
Q9UBM1	-3.87	-10.29	-11.45
Q9UBX3	-2.27	-7.15	-7.18
Q9UBZ4	-5.82	-8.97	-8.73
Q9UDW1	-1.54	-5.77	-6.57
Q9UDX5	-2.76	-7.22	-7.72
Q9UG56	-2.64	-8.8	-8.2
Q9UGC7	-3.11	-7.63	-7.93
Q9UGM6	-4.38	-10.44	-10.93
Q9UH62	-2.58	-6.19	-7.83
Q9UHK6	-3.67	-8	-10.85
Q9UHN1	-3.01	-7.36	-9.01
Q9UHV9	-2.65	-5.76	-6.75
Q9UI09	-4.01	-8.13	-8.19
Q9UI17	-3.69	-10.08	-11.07
Q9UI32	-4.32	-9.13	-8.05
Q9UI43	-4.33	-8.94	-10.26
Q9UIF7	-3.6	-8.42	-9.41
Q9UIJ7	-3.56	-11.51	-11.22
Q9UJ68	-3.4	-6.31	-8.39
Q9UJA2	-4.25	-7.68	-8.83
Q9UJC3	-3.8	-6.64	-6.45
Q9UJS0	-3.99	-8.92	-9.56
Q9UJZ1	-2.23	-6.35	-6.89
Q9UKA2	-4.04	-10.55	-11.37
Q9UKL3	-3.73	-6.97	-7.9
Q9UKU0	-3.55	-8.45	-8.62
Q9UKU7	-5.04	-9.28	-9.51
Q9UL12	-4.95	-9.71	-10.12
Q9ULC5	-6.23	-9.24	-8.91
Q9ULC8	-4.05	-8.45	-9.49
Q9ULD0	-4.99	-7.76	-7.61
Q9ULD2	-1.37	-5.2	-5.69
Q9ULZ2	-5.59	-6.79	-7.66
Q9ULZ3	-2.28	-6.29	-6.31
Q9UMS0	-4.35	-6.08	-7.89
Q9UMX3	-2.35	-7.67	-8.49
Q9UMX5	-3.13	-6.98	-7.73
Q9UNQ0	-3.18	-8.78	-9.62
Q9UP65	-3.32	-6.78	-9.1
Q9UPI3	-1.83	-9.2	-9.46
Q9UPW5	-3.07	-7.86	-8.57
Q9UQ90	-4.07	-8.73	-7.98
Q9UQF2	-5.76	-8.62	-9.46
Q9Y234	-3.9	-8.65	-10.44
Q9Y237	-4.54	-7.35	-8.43
Q9Y255	-2.86	-9.89	-11.03
Q9Y267	-3.82	-9.29	-9.56
Q9Y276	-3.08	-8.84	-6.99
Q9Y277	-3.58	-7.85	-8.86
Q9Y291	-1.75	-5.51	-6.62
Q9Y2C4	-2.15	-9.74	-9.6
Q9Y2D0	-3.97	-6.8	-8.12
Q9Y2N7	-3.06	-7.27	-7.91
Q9Y2Q9	-4.76	-6.76	-7.51
Q9Y2R5	-2.7	-6.08	-7.6
Q9Y2R9	-6.48	-7.49	-7.87
Q9Y2S7	-6.47	-9.18	-10.74
Q9Y2W6	-3.12	-7.98	-9.38
Q9Y2Y0	-3.66	-6.69	-7.36
Q9Y2Z2	-3.71	-9.96	-10.83
Q9Y2Z4	-4.8	-10.13	-7.97
Q9Y2Z9	-3.75	-8.38	-10.41
Q9Y305	-2.84	-8.29	-8.37
Q9Y320	-5.09	-8.15	-9.95
Q9Y371	-3.91	-7.76	-7.2
Q9Y375	-3.67	-6.92	-8.71
Q9Y399	-3.71	-7.29	-8.07
Q9Y3A0	-3.54	-8.33	-10.38
Q9Y3B7	-2.87	-6.9	-7.64
Q9Y3B8	-3.9	-8.24	-9.1
Q9Y3D2	-3.06	-6.79	-8.11
Q9Y3D3	-4.45	-6.16	-6.97
Q9Y3D5	-2.69	-6.63	-7.19
Q9Y3D6	-3.66	-5.93	-8.16
Q9Y3D7	-3.47	-7.01	-8.08
Q9Y3D9	-3.94	-7.16	-7.26
Q9Y3E2	-2.46	-6.99	-8.59
Q9Y3E5	-4.11	-6.02	-7.96
Q9Y3I1	-3.93	-7.01	-6.97
Q9Y3M8	-3.95	-8.13	-7.4
Q9Y4E8	-5.4	-8.3	-8.72
Q9Y4P1	-4.75	-8.13	-8.42
Q9Y4W6	-5.48	-8.83	-8.35
Q9Y512	-2.53	-8.31	-9.31
Q9Y584	-2.76	-6.99	-7.14
Q9Y5R4	-3.52	-8.07	-8.23
Q9Y5T4	-4.44	-6.2	-7.69
Q9Y5U8	-2.02	-5.71	-5.74
Q9Y5Y0	-2.65	-7.73	-6.51
Q9Y5Z4	-4.51	-7.53	-8.54
Q9Y5Z9	-4.02	-7.77	-9.92
Q9Y606	-4.55	-8.62	-9.99
Q9Y619	-2.37	-7.76	-7.56
Q9Y676	-3.26	-6.94	-6.25
Q9Y696	-4.41	-7.68	-8.43
Q9Y697	-3.6	-8.18	-10.12
Q9Y6C9	-4.08	-7.92	-9.42
Q9Y6J8	-3.45	-8.38	-8.12
Q9Y6M9	-6.32	-8.81	-7.47
Q9Y6N1	-3.37	-7.12	-8.19
Q9Y6N5	-2.49	-10.78	-11.03
