# Supplementary material for: Hydrolyzing NAD to NMN and AMP by SelO is Required for Mitochondria Homeostasis
Source: Research Square preprint supplement (doi:10.21203/rs.3.rs-5137152/v1), 2024-10-17
Supplement: Supplementary file 4 [file 797eb3b6c03a0980be534b5d.docx]

**Figure Legends (more detailed)**

**Fig. 1: SelO hydrolyzes NAD**

1. Screening of potentially uncharacterized NAD+ binding proteins using reverse docking. AlphaFold2 modeled structures for all mitochondrial proteins, excluding known NAD+/NADH or NADP+/NADPH binding proteins, were compiled. Three different molecular docking tools were used to evaluate the interactions between NAD+ and each protein. The x,y,z axes represent normalized ranks of the protein binding scores, where 1.0 stands for the top rank among all evaluated proteins, and 0.0 stands for the lowest rank. Orange dots denote selected NAD+ binding candidates.
2. Knockdown of SelO increases cellular NAD levels in HepG2. HepG2 cells were transfected with siRNA targeting SelO. The total NAD concentration (NAD+ and NADH) was determined using a WST-8 based colorimetric assay 36 h after transfection. Error bars represent SEM. n=3.
3. Knockdown of SelO increases cellular NAD levels in HeLa cells. Doxycycline, a tetracycline-class antibiotic, was supplemented in the culture medium to induce expression of shRNA targeting SelO. The total NAD concentration (NAD+ and NADH) was determined using a WST-8 based colorimetric assay. The figure displays results from two single-cell clones stably expressing tetracycline inducible shSelO expressing HeLa cells. Error bars represent SEM. n=3
4. Surface plasmon Resonance (SPR) analysis of the binding of NAD+ to SelO. Recombinantly purified SelO was covalently immobilized on a CM5 sensor chip. Hepes buffer containing various concentrations of NAD+ was injected over the SelO-coated sensor chip. The rising phase of the response curve in the first 120 seconds following injection describes the binding of NAD+ to SelO and after 120 seconds, the response curve drops due to the dissociation of NAD+.
5. Validation the chemical identities of the enzymatic reaction products using LC-MS/MS. An HSS T3 column was employed for this analysis, operating in negative ion mode. Three Q1/Q3 channels were used for detection of AMP and NMN, respectively. The structure of the precursor ion and the inferred fragmented ion are depicted on the HPLC profiles.
6. Analysis of the products resulting from the enzymatic reaction of SelO with NAD+ as the substrate using HPLC coupled with UV-Vis. A reverse-phase C18 column was employed for this analysis. SelO hydrolyzed NAD+ into AMP and NMN. The alignment of the enzymatic reaction products with AMP and NMN standards was demonstrated.
7. Enzymatic activity of human SelO in the presence of various divalent cations. The activities were measured using HPLC. Error bars represent SD. n=3.
8. Enzymatic activity of human SelO in the presence of various concentrations of NMN. Error bars represent SD. n=3
9. Analysis of the products resulting from the enzymatic reaction of human SelO with NADH as the substrate using HPLC coupled with UV-Vis. A reverse-phase C18 column was employed for this analysis. SelO hydrolyzed NADH into AMP and NMNH. Note that only NADH and NMNH absorb light at 340 nm due to the presence of nicotinamide ring.
10. Knockdown of SelO increases mitochondrial NAD+ levels in HeLa cells. Tetracycline inducible SelO-knockdown HeLa cells were stably transfected with a mitochondrial localization sequence fused NAD+ sensor based on a circular-permuted fluorescent protein. The NAD+ sensor reports local NAD+ levels using a ratiometric method. A higher NAD+ level leads to lower fluorescence intensity at 488 nm excitation, whereas the fluorescent intensity remains unaffected at 405 nm excitation. Therefore, the ratio of the fluorescence signal at two excitation wavelengths is independent of the expression level of the reporter. Representative images are shown in the left panel. The scale bar represents 20 μm. Quantification is presented in the right panel. Error bars represent SEM. n=59, 66, 60 from left to right.
11. Michaelis–Menten plot for SelO hydrolyzing NAD+.

**Fig. 2: SelO attenuates NAD and lipid metabolism**

1. Volcano plot representation of differentially regulated metabolites in HeLa cells expressing shRNA targeting SelO versus control cells.
2. Metabolite set overrepresentation analysis for KEGG pathway-based metabolite sets overrepresented in significantly upregulated or downregulated metabolites. The analysis was performed with MetaboAnalyst. Note that nicotinate and nicotinamide metabolism in downregulated metabolite is the only pathway exceeding the significant threshold of p<0.05.
3. Metabolite enrichment analysis for lipid and lipid-like molecules. The log2FC was used as the ranking metric. The metabolite set was defined as molecules belonging to the lipid and lipid-like molecule ClassyFire superclass.
4. Quantification of NAD levels in HeLa cells expressing shRNA targeting SelO and control cells derived from the metabolomic data. Error bars represent SEM. n=6
5. Selo knockout increases NAD consumption rates in mitochondria. Mitochondria were isolated from liver tissue and allowed to incubate in mitochondrial respiration media (MiR05) for the indicated time. The remaining NAD in the mitochondria after the incubation was determined using a WST-8 based colorimetric assay. Error bars represent SD. n=3
6. SelO knockout mitochondria hydrolyze exogenously supplemented NAD+ at lower efficiency. Mitochondria were isolated from liver tissues, and isotope labeled NAD+ was supplemented to the buffer containing suspended mitochondria. The formation of isotope labeled NMNH was quantified using high-resolution LC-MS. Error bars represent SEM. n=3
7. Metabolic measurements were performed with *Selo*fl/fl (n=4, blue bar) and Selo liver-specific knockout mice *Selo*fl/fl Alb-Cre (n=3, pink bar) in metabolic cage. The mice are under a normal diet before the metabolic measurements. Error bars represent SEM. The kinetic data for respiratory exchange rate (RER) were depicted.
8. Average lipid oxidation levels (left panel) and carbohydrate oxidation levels (right panel) for wildtype and conditional knockout mice measured in metabolic cage. Error bars represent SEM. left panel: n=3; right panel: n=4 for *Selo*fl/fl, n=3 for *Selo*fl/fl Alb-Cre. Note that the original data included four replicates for *Selo*fl/fl, yet one sample produced a negative value for the lipid oxidation level was thus discarded as an outlier.
9. Oil red staining of liver tissue in *Selo*fl/fl Alb-Cre and Alb-Cre mice after 8 weeks of a high-fat diet. Representative images are shown in (**E**) and quantification of the oil red staining is presented in (**F**) Scale bar represents 100 μm. Error bars represent SEM. n=8
10. Quantification of acetyl-coA, butyryl-coA, hexanoyl-coA, and octanoyl-coA levels in mitochondria from mouse liver. Mitochondria were isolated from the livers of *Selo*fl/fl Alb-Cre and *Selo*fl/fl mice at 3 months under normal diet. Error bars represent SEM. n=3 for acetyl-coA and butyryl-coA; n=4 for hexanoyl-coA and octanoyl-coA.
11. Oil red staining of primary hepatocytes isolated from liver tissues of *Selo*fl/fl Alb-Cre and Alb-Cre mice under a normal diet. The cells were treated with a 1:1 mixture of palmitic acid (PA) and oleic acid (OA) for 24 h prior to the oil red staining. The nuclei were stained with Hematoxylin. Scale bar represents 20 μm. Error bars represent SEM. n=9
12. Oil red staining of tetracycline inducible SelO knockdown HeLa cells exposed to palmitic acid (PA) and oleic acid (OA). Cells were treated with doxycycline and infected with SelO overexpressing or control adenovirus prior to PA/OA treatment for 24 hours. Representative images and quantification of the oil red staining are presented. Scale bar represents 30 μm. Error bars represent SEM. n=6,5,7 from left to right.
13. BODIPY 493/503 staining of Tetracycline-inducible SELO knockdown HeLa cells exposed to palmitic acid (PA) and oleic acid (OA). Doxycycline, a tetracycline-class antibiotic, was supplemented in the culture medium to induce expression of shRNA targeting SELO. The cells were transfected with empty vector or SELO overexpressing plasmid prior to PA/OA treatment for one day. Quantification of the BODIPY 493/503 staining is presented in the left panel, and representative images are shown in the right panel. Scale bar represents 20 μm. Error bars represent SEM. n=259, 327, 271 from left to right in the right panel.
14. Gene set enrichment analysis (GSEA) of the pathways enriched in upregulated or downregulated genes. Mouse WikiPathways were used for the GSEA analysis. The bar chart displays the only five pathways with q-values <0.05
15. qPCR analysis of mRNA levels for genes related to fatty acid β-oxidation in liver tissues from either Selo knockout mice or control mice. Error bars represent SEM. n=3

**Fig. 3 SelO regulates mitochondrial homeostasis**

1. Analysis of the alanine aminotransferase (ALT) level and aspartate aminotransferase (AST) level in blood from *Selo*fl/fl Alb-Cre and *Selo*fl/fl mice under normal feed at 3 months old. The ALT and AST levels were determined using an automatic biochemistry and immunoassay analyzer (Mindary SAL 9000) based colorimetric enzymatic assays employing lactate dehydrogenase. Error bars represent SD. For ALT, n=5 for *Selo*fl/fl and n=4 for *Selo*fl/fl Alb-Cre; for AST, n=5 for *Selo*fl/fl and n=5 for *Selo*fl/fl Alb-Cre. Note that the original data included five replicates for *Selo*fl/fl Alb-Cre when measuring ALT, yet the analyzer failed to output any value for one of the samples.
2. Electron microscopy evaluation of the mitochondria in liver cells from *Selo*fl/fl Alb-Cre and *Selo*fl/fl mice at 3 months or 12 months old under a normal diet. Representative images are shown in the left panel. The scale bars represent 2 μm. The distribution of the projected mitochondrial area is displayed in the middle panel. The quantification of the number of mitochondria per field of view is displayed in the right panel. For quantification of mitochondrial area, n=249, 378, 64, 488 from left to right; for quantification of the number of mitochondria, n=10,10,6,9 from left to right. Error bars represent SEM for the quantification of mitochondrial number.
3. Quantification of the clarity of the mitochondrial double membrane or intermembrane space for 3-month-old mice (top panel) or 12-month-old mice (bottom panel).
4. Confocal microscopy evaluation of the colocalization of mitochondrial outer membrane marker (Tom20) and mitochondrial matrix marker (Hsp60) in liver cells derived from *Selo*fl/fl Alb-Cre and *Selo*fl/fl mice at 3 months old. Representative immunofluorescence images are shown in the left panels. Scale bars represent 2 μm. The fluorescence intensity profiles (middle panels) of Hsp60 and Tom20 illustrate the distribution of fluorescence across the semi-transparent white lines in the representative images. A pixel-wise colocalization analysis was performed for the representative immunofluorescent images. The intensity scatterplots are shown in the right panels for *Selo*fl/f and *Selo*fl/fl Alb-Cre, respectively.
5. Electron microscopy evaluation of the mitochondria in HepG2 cells following siRNA induced SelO knockdown. The cells were fixed 48 hours following SelO knockdown. Representative images are shown in the left panel. The scale bars represent 2 μm. The distribution of the projected mitochondrial area is displayed in the middle panel. The quantification of the number of mitochondria per field of view is displayed in the right panel. For mitochondria area, n=231 for siCont and n=629 for siSelO; for mitochondria number per field of view, n=14 for siCont and n=17 for siSelO. Error bars represent SEM.
6. Enzymatic activity of human SelO under various pH conditions. The activities were measured using HPLC. Error bars represent SD. n=3.
7. HeLa cells with tetracycline-inducible SelO knockdown were transfected with mitochondrially localized super ecliptic pHluorin, a genetically encoded, pH sensor to monitor pH levels in the mitochondrial matrix. A higher ratio of green fluorescence intensity to red fluorescence intensity indicates an elevated pH. Representative images are shown in the left panels. The scale bar represents 10 μm. Quantification is presented in the right panel. Error bars represent SEM. n=60, 73, 60 from left to right.
8. HeLa cells with tetracycline-inducible SelO knockdown were transfected with a genetically encoded, mitochondrially localized ratiometric pH sensor to monitor pH levels in the mitochondrial matrix. A higher ratio of green fluorescence intensity at 405 nm and 488 nm excitation indicates an elevated pH. Representative images are shown in the left panels. The scale bar represents 10 μm. Quantification is presented in the right panel. Error bars represent SEM. n=41, 64, 77 from left to right.

**Fig. 4 Investigation of the mechanistic basis for SelO catalysis and evaluation of SelO inhibitors**

1. AlphaFold3-predicted binding mode of SelO with NAD. The conformation with the highest prediction score is shown. A close-up diagram illustrates the steric relationships between NAD and Mn²⁺.
2. Enzymatic activity of wildtype and mutant SelO. The activities were measured using HPLC. Error bar represents SD. n=3.
3. Western blot analysis of AMPylation levels of wildtype and mutant SelO under different reaction conditions. Recombinant SelO was incubated with ATP for indicated time. AutoAMPylation was detected using a monoclonal anti-AMP antibody.
4. The SelO C667A mutant failed to rescue the NAD increase induced by SelO knockdown to the same extent as wildtype SelO. Total cellular NAD concentrations were measured using a WST-8-based colorimetric assay. Error bars represent the SEM. n=3
5. SelO C667A mutant failed to rescue the SelO knockdown induced increase in mitochondrial pH. HepG2 cells were first transfected with a mitochondrially localized ratiometric pH sensor. One day after transfection, the cells were co-transfected with indicated siRNA and overexpressing vectors again. A higher ratio of green fluorescence intensity at 405 nm and 488 nm excitation indicates an elevated pH. Representative images are shown in the left panels. Representative images are shown in the left panels. The scale bar represents 5 μm. Quantification is presented in the right panel. Error bars represent SEM. n=69, 83, 63, 69 from left to right.
6. BODIPY 493/503 staining of HepG2 cells exposed to palmitic acid (PA) and oleic acid (OA). Cells were transfected with siRNA and SelO overexpressing plasmid or control vector prior to PA/OA treatment for one day. Quantification of the BODIPY 493/503 staining is presented in the left panel, and representative images are shown in the right panel. Scale bar represents 20 μm. Error bars represent SEM. n=313,182, 384, 211 from left to right in the right panel.
7. Dose-response curves of recombinant SelO proteins in the presence of varying concentrations of scutellarein and ethyl gallate. SelO was used at a concentration of 2 μM, and NAD+ at 100 μM. The curves were fitted to a one-site binding model to derive the IC50 values.
8. Knockdown or inhibition of SelO increased mitochondrial NAD levels in HeLa cells. Tetracycline inducible SelO-knockdown HeLa cells were treated with indicated chemicals. The mitochondria from the cells were isolated and the total NAD concentrations were determined using a WST-8 based colorimetric assay 1.5 hr following the treatment. Error bar represents SEM. n=3
9. Surface plasmon Resonance (SPR) analysis of the binding of scutellarein to SelO. Recombinantly purified SelO was covalently immobilized on a CM5 sensor chip. Hepes buffer containing various concentrations of scutellarein was injected over the SelO-coated sensor chip. The rising phase of the response curve in the first 120 seconds following injection describes the binding of scutellarein to SelO and after 120 seconds, the response curve drops due to the dissociation of scutellarein.
10. Michaelis-Menten plot showing SelO activity in the absence and presence of Scutellarein. Each data point represents the mean of two replicates.
11. Oil red staining of HepG2 cells exposed to palmitic acid (PA) and oleic acid (OA). Cells were transfected with siRNA and SelO overexpressing plasmid or control vector prior to PA/OA treatment for 24 hours. Quantification of oil red staining is presented in the left panel, and representative images are shown in the right panel. Scale bar represents 100 μm. Error bars represent SEM. n=6.

**Fig. 5 SelO and its homolog in E. coli interacts with proteins involved in fatty acid β-oxidation**

1. Coimmunoprecipitation of Flag-tagged SelO with HA-tagged HADHA in HEK293T cells. Cells were collected 36 h after transfection.
2. Coimmunoprecipitation of Flag-tagged SelO with V5-tagged HADHB in HEK293T cells. Cells were collected 36 h after transfection.
3. Coimmunoprecipitation of Flag-tagged HADH with HA-tagged SelO in HEK293T cells. Cells were collected 36 h after transfection.
4. Coimmunoprecipitation of Flag-tagged ACAA2 with HA-tagged SelO in HEK293T cells. Cells were collected 36 h after transfection.
5. Coimmunoprecipitation of Flag-tagged ECHS1 with HA-tagged SelO in HEK293T cells. Cells were collected 36 h after transfection.
6. Schematic illustration of the relationship between human mitochondrial trifunctional enzyme subunits and *E. coli* trifunctional enzyme subunits. *E. coli* possesses two sets of trifunctional enzymes for fatty acid β-oxidation: one for aerobic fatty acid metabolism and another for anaerobic fatty acid metabolism.
7. Overexpression of SelO does not affect the interaction between HADHA and HADHB. Coimmunoprecipitation of Flag-tagged HADHB with endogenous HADHA upon overexpression of SelO in HEK293T cells
8. Knockdown of SelO does not affect the interaction between HADHA and HADHB. Coimmunoprecipitation of Flag-tagged HADHB with endogenous HADHA upon knockdown of SelO in HEK293T cells.
9. SelO directly interacts with the complex formed by HADHA and HADHB. Recombinant GST-HADHA and HADHB were co-purified from *E. coli*. The recombinant SelO protein was incubated with the recombinant HADHA and HADHB *in vitro*, and GST pulldown was performed.
10. SelO affects the activity of HADHA. Flag-tagged HADHA was isolated from transfected HEK293T cells through immunoprecipitation. Human SelO recombinantly purified from *E. coli*. The conversion of 2,3-enoylpalmitoyl-CoA to 3-ketopalmitoyl-CoA (forward reaction) was quantified using high-resolution LC-MS. 2,3-enoylpalmitoylCoA was generated from palmitoyl-CoA using recombinant human ACOX1 protein. Error bars represent SEM. n=3
11. SelO affects the activity of HADHA. Flag-tagged HADHA was isolated from transfected HEK293T cells through immunoprecipitation. Human SelO recombinantly purified from *E. coli*. The conversion of 3-ketopalmitoyl-CoA to 2,3-enoylpalmitoyl-CoA (reverse reaction) was quantified using high-resolution LC-MS. Error bars represent SEM. n=4
12. The SelO C667A mutant failed to inhibit HADHA to the same extent. Flag-tagged HADHA was isolated from transfected HEK293T cells through immunoprecipitation. Human SelO was recombinantly purified from *E. coli*. The conversion of 2,3-enoylpalmitoyl-CoA to 3-ketopalmitoyl-CoA (forward reaction) was quantified using high-resolution LC-MS. 2,3-enoylpalmitoylCoA was generated from palmitoyl-CoA using recombinant human ACOX1 protein. Error bars represent SEM. n=3
13. Scutellarein rescued the inhibitory effect of SelO on the activity of HADHA. Flag-tagged HADHA was isolated from transfected HEK293T cells through immunoprecipitation. Human SelO was recombinantly purified from *E. coli*. The conversion of 2,3-enoylpalmitoyl-CoA to 3-ketopalmitoyl-CoA (forward reaction) was quantified using high-resolution LC-MS. 2,3-enoylpalmitoylCoA was generated from palmitoyl-CoA using recombinant human ACOX1 protein. Error bars represent SEM. n=3
14. Surface plasmon Resonance (SPR) analysis of the binding of NAD+ to ydiU. Recombinantly purified ydiU was covalently immobilized on a CM5 sensor chip. Hepes buffer containing various concentrations of NAD+ was injected over the ydiU-coated sensor chip. The rising phase of the response curve in the first 120 seconds following injection describes the binding of NAD+ to ydiU and after 120 seconds, the response curve drops due to the dissociation of NAD+.
15. Enzymatic activity of *E. coli* ydiU in the presence of magnesium or manganese ion. The activities were measured using HPLC. Error bar represents SD. n=3.
16. Michaelis–Menten plot for ydiU hydrolyzing NAD+. For the left panel, each point represents the average of two replicates. For the right panel, each point represents the slope of each fitted line in the left panel.
17. ydiU interacts with fadB. Coimmunoprecipitation of Flag-tagged ydiU with HA-tagged fadB in *E. coli* cells. BL21(DE3) *E. coli.* was transformed with the corresponding expression plasmids, and protein expression was induced with IPTG.
18. The presence of fadB does not affect the interaction between fadA and ydiU. Similarly, the presence of fadA does not affect the interaction between fadB and ydiU. Flag pulldown was performed using Flag-tagged ydiU with recombinantly purified HA-tagged fadB or V5-tagged fadA.
19. ydiU coeluted with fadA and fadB in size exclusion chromatography (SEC). The proteins were separated on the Superdex 75 SEC column. Fractions were collected, and proteins in each fraction were precipitated with acetone and analyzed using silver stain.
20. *E. coli* growth curve for ydiU knockout or wildtype *E. coli* in M9 media with either glucose (top panel) or oleic acid (bottom panel) as sole carbon source. Error bars represent SD. n=3
