# Supplementary material for: Hydrolyzing NAD to NMN and AMP by SelO is Required for Mitochondria Homeostasis
Source: Research Square preprint supplement (doi:10.21203/rs.3.rs-5137152/v1), 2024-10-17
Supplement: Supplementary file 5 [file d411c6c167f9efea894838b0.xlsx]

## Sheet: Sheet1
Table S1. Primers for cloning
pet28a-His6-ydiU-Flag
Genomic DNA was extracted from e. coli. ydiU was PCR amplified from the genomic DNA using the following primers. Empty pet28a vector was linearized with EcoRI, and the product of PCR step 4 was used to prime a PCR reaction.
Step1	GCAGCCATCATCATCATCATCACAGCAGCGGCATGACCCTGTCTTTTGTTACCCGC
	GTAATCCTTGTCGTCATCGTCTTTGTAGTCACTCGAGCAGCTGACTTCCAG
Step2	GTTTAACTTTAAGAAGGAGATATACCATGGGCAGCAGCCATCATCATCATCATC
	CTTATCGTCGTCATCCTTGTAATCCTTGTCGTCATCGTCTTTGTAGTC
Step3	GTTTAACTTTAAGAAGGAGATATACCATGGGCAGCAGCCATCATCATCATCATC
	CTCAGCTTCCTTTCGGGCTTTGTTACTTATCGTCGTCATCCTTGTAATCCTTGTCG
Step4	GTTTAACTTTAAGAAGGAGATATACCATGGGCAGCAGCCATCATCATCATCATC
	ATGCTAGTTATTGCTCAGCGGTGGCAGCAGCCAACTCAGCTTCCTTTCGGGCTTTGTTA
pLKO-tet-shSELO
plKO-tet backbone vector was purchased from Addgene (21915). The vector was linearized with AgeI and EcoRI. The primers below were annealed to form dsDNA insert. The annealed oligonucleotides were ligated to the vector using the T4 ligase.
Step1	CCGGGCTTCCACTTTCATAAGGTTTCTCGAGAAACCTTATGAAAGTGGAAGCTTTTT
	AATTAAAAAGCTTCCACTTTCATAAGGTTTCTCGAGAAACCTTATGAAAGTGGAAGC
plenti-Selo-Flag (mouse)
Total RNA was extracted from mouse liver tissues using TRIzol. The cDNA was reverse-transcribed from the total mRNA. Mouse Selo was PCR amplified from the cDNA mixture using the following primers. Plenti-GFP-flag was linearized with EcoRI and BamHI to remove the GFP fragment and then the PCR product was cloned into the linearized lentiviral vector using recombinase.
Step1	ATGGCCTCTGTCAGGGCCGC
	TGTTACACAGAGTTCTGCTGCCCAGAGG
Step2	CTACCTCGAGCTCAAGCTTCGAATTCGCCACCATGGCCTCTGTCAGGGCCGC
	TGTCATCGTCATCCTTGTAGTCGGATCCTGTTACACAGAGTTCTGCTGCCCAGAGG
pet28a-fadA-V5
Genomic DNA was extracted from e. coli. fadA was PCR amplified from the genomic DNA using the following primers. Empty pet28a vector was linearized with EcoRI, and the product of PCR step 5 was used to prime a PCR reaction.
Step1	ATGGAACAGGTTGTCATTGTCGATGC
	AACCCGCTCAAACACCGTCG
Step2	GCAGCCATCATCATCATCATCACAGCAGCGGCATGGAACAGGTTGTCATTGTCGATGC
	GGAGAGGGTTAGGGATAGGCTTACCAACCCGCTCAAACACCGTCG
Step3	GTTTAACTTTAAGAAGGAGATATACCATGGGCAGCAGCCATCATCATCATCATC
	CGTAGAATCGAGACCGAGGAGAGGGTTAGGGATAGGCTTACC
Step4	GTTTAACTTTAAGAAGGAGATATACCATGGGCAGCAGCCATCATCATCATCATC
	CTCAGCTTCCTTTCGGGCTTTGTTACGTAGAATCGAGACCGAGGAGAG
Step5	GTTTAACTTTAAGAAGGAGATATACCATGGGCAGCAGCCATCATCATCATCATC
	ATGCTAGTTATTGCTCAGCGGTGGCAGCAGCCAACTCAGCTTCCTTTCGGGCTTTGTTA
pet28a-fadB-HA
Genomic DNA was extracted from e. coli. fadB was PCR amplified from the genomic DNA using the following primers. Empty pet28a vector was linearized with EcoRI, and the product of PCR step 4 was used to prime a PCR reaction.
Step1	ATGCTTTACAAAGGCGACACCCT
	AGCCGTTTTCAGGTCGCCAA
Step2	GCAGCCATCATCATCATCATCACAGCAGCGGCATGCTTTACAAAGGCGACACCCT
	AGCGTAATCTGGAACATCGTATGGGTAAGCCGTTTTCAGGTCGCCAA
Step3	GTTTAACTTTAAGAAGGAGATATACCATGGGCAGCAGCCATCATCATCATCATC
	CTCAGCTTCCTTTCGGGCTTTGTTAAGCGTAATCTGGAACATCGTATGGGTA
Step4	GTTTAACTTTAAGAAGGAGATATACCATGGGCAGCAGCCATCATCATCATCATC
	ATGCTAGTTATTGCTCAGCGGTGGCAGCAGCCAACTCAGCTTCCTTTCGGGCTTTGTTA
pet28a-yfcX-HA
Genomic DNA was extracted from e. coli. yfcX was PCR amplified from the genomic DNA using the following primers. Empty pet28a vector was linearized with EcoRI, and the product of PCR step 4 was used to prime a PCR reaction.
Step1	ATGGAAATGACATCAGCGTTTACCCT
	TTGCAGGTCAGTTGCAGTTGTTTT
Step2	GCAGCCATCATCATCATCATCACAGCAGCGGCATGGAAATGACATCAGCGTTTACCCT
	AGCGTAATCTGGAACATCGTATGGGTATTGCAGGTCAGTTGCAGTTGTTTT
Step3	GTTTAACTTTAAGAAGGAGATATACCATGGGCAGCAGCCATCATCATCATCATC
	CTCAGCTTCCTTTCGGGCTTTGTTAAGCGTAATCTGGAACATCGTATGGGTA
Step4	GTTTAACTTTAAGAAGGAGATATACCATGGGCAGCAGCCATCATCATCATCATC
	ATGCTAGTTATTGCTCAGCGGTGGCAGCAGCCAACTCAGCTTCCTTTCGGGCTTTGTTA
plenti-HADHB-V5
Total RNA was extracted from a mixture of HEK293T, HeLa and HepG2 cells using TRIzol. The cDNA was reverse-transcribed from the total mRNA. HADHB was PCR amplified from the cDNA mixture using the following primers. Plenti-GFP-V5 was linearized with EcoRI and BamHI to remove the GFP fragment, and then the PCR product was cloned into the linearized lentiviral vector using recombinase.
Step1	ATGACTATCTTGACTTACCCCTTTAAAAATCTTCCC
	TTTTGGATAAGCTTCCACTATCATAGCATGG
Step2	CTCGAGCTCAAGCTTCGAATTCGCCACCATGACTATCTTGACTTACCCCTTTAAAAATC
	GGAGAGGGTTAGGGATAGGCTTACCGGATCCTTTTGGATAAGCTTCCACTATCATAGCA
plenti-HADHA-HA
Total RNA was extracted from a mixture of HEK293T, HeLa and HepG2 cells using TRIzol. The cDNA was reverse transcribed from the total mRNA. HADHA was PCR amplified from the cDNA mixture using the following primers. Plenti-GFP-HA was linearized with EcoRI and BamHI to remove the GFP fragment and then the PCR product was cloned into the linearized lentiviral vector using recombinase.
Step1	ATGGTGGCCTGCCGGGCG
	CTGGTAGAACTTCTTGTTAGGGCTGTTAGCA
Step2	CTACCTCGAGCTCAAGCTTCGAATTCGCCACCATGGTGGCCTGCCGGGCG
	GCGTAATCTGGAACATCGTATGGGTAGGATCCCTGGTAGAACTTCTTGTTAGGGCTGTT
plenti-ACAA2-Flag
Total RNA was extracted from a mixture of HEK293T, HeLa and HepG2 cells using TRIzol. The cDNA was reverse-transcribed from the total mRNA. ACAA2 was PCR amplified from the cDNA mixture using the following primers. Plenti-GFP-Flag was linearized with EcoRI and BamHI to remove the GFP fragment, and then the PCR product was cloned into the linearized lentiviral vector using recombinase.
Step1	ATGGCTCTGCTCCGAGGTG
	GGCTGTGCTCTGAATGATGACAGC
Step2	CTCGAGCTCAAGCTTCGAATTCGCCACCATGGCTCTGCTCCGAGGTG
	CCTTGTCATCGTCATCCTTGTAGTCGGATCCGGCTGTGCTCTGAATGATGACAGC
plenti-HADH-Flag
Total RNA was extracted from a mixture of HEK293T, HeLa and HepG2 cells using TRIzol. The cDNA was reverse-transcribed from the total mRNA. HADH was PCR amplified from the cDNA mixture using the following primers. Plenti-GFP-Flag was linearized with EcoRI and BamHI to remove the GFP fragment, and then the PCR product was cloned into the linearized lentiviral vector using recombinase.
Step1	ATGGCCTTCGTCACCAGGCA
	CTTGTATTTGTAAAATCCTTCTCCAGTCTTCTTGC
Step2	CTCGAGCTCAAGCTTCGAATTCGCCACCATGGCCTTCGTCACCAGGCA
	TTGTCATCGTCATCCTTGTAGTCGGATCCCTTGTATTTGTAAAATCCTTCTCCAGTCTT
plenti-ECHS1-Flag
Total RNA was extracted from a mixture of HEK293T, HeLa and HepG2 cells using TRIzol. The cDNA was reverse-transcribed from the total mRNA. ECHS1 was PCR amplified from the cDNA mixture using the following primers. Plenti-GFP-Flag was linearized with EcoRI and BamHI to remove the GFP fragment, and then the PCR product was cloned into the linearized lentiviral vector using recombinase.
Step1	ATGGCCGCCCTGCGTGTC
	CTGGTCTTTGAAGTTGGCCTTTCTCT
Step2	CTCGAGCTCAAGCTTCGAATTCGCCACCATGGCCGCCCTGCGTGTC
	CCTTGTCATCGTCATCCTTGTAGTCGGATCCCTGGTCTTTGAAGTTGGCCTTTCTCT
plenti-SELO-HA
SELO was PCR amplified from pet28a-SUMO-SELO using the following primers. Plenti-GFP-HA was linearized with EcoRI and BamHI to remove the GFP fragment and then the PCR product was cloned into the linearized lentiviral vector with recombinase.
Step1	TAATCTGGAACATCGTATGGGTAGGATCCCGAAGAGCATGTCACGCACAGTTCTG
	CTACCTCGAGCTCAAGCTTCGAATTCGCCACCATGGCCGTATACAGGGCAGCGCT
pet28a-GST-ydiU-His6
ydiU was PCR amplified from pet28a-His6-ydiU-Flag using the following primers. Empty pGEX-4T-1 was linearized with EcoRI, and then the PCR product was cloned into the linearized pGEX vector with recombinase.
Step1	GATCTGGTTCCGCGTGGATCCCCGGAATTCATGACCCTGTCTTTTGTTACCCGTTG
	TCAGTGGTGGTGGTGGTGGTGACTCGAGCAGCTGACTTCCAG
Step2	GATCTGGTTCCGCGTGGATCCCCGGAATTCATGACCCTGTCTTTTGTTACCCGTTG
	ATGCGGCCGCTCGAGTCGACCCGGGAATTCTCAGTGGTGGTGGTGGTGGTG
pet28a-His6-ACOX1
Total RNA was extracted from a mixture of HEK293T, HeLa and HepG2 cells using TRIzol. The cDNA was reverse-transcribed from the total mRNA. ACOX1 was PCR amplified from the cDNA mixture using the following primers. Empty pet28a vector was linearized with EcoRI, and the product of PCR step 3 was used to prime a PCR reaction.
Step1	ATGAACCCGGACCTGCGCA
	GAGCTTGGACTGCAGTGACTTCA
Step2	GCAGCAGCCATCATCATCATCATCACAGCAGCGGCATGAACCCGGACCTGCGCA
	CTCAGCTTCCTTTCGGGCTTTGTTAGAGCTTGGACTGCAGTGACTTCA
Step3	GTTTAACTTTAAGAAGGAGATATACCATGGGCAGCAGCCATCATCATCATCATC
	ATGCTAGTTATTGCTCAGCGGTGGCAGCAGCCAACTCAGCTTCCTTTCGGGCTTTGTTA
mito-mCherry-SEpHluorin
A short fragment of mCherry fused to COX8A mitochondrial localization sequence was PCR amplified from the mCherry-SEpHluorin plasmid using the following primers. mCherry-SEpHluorin plasmid was linearized with EcoRI, and the product of PCR step 5 was used to prime a PCR reaction.
Step1	TCGTTGGGGGATCCACCGGTCGCCACCTGCGGCCGCATGGTGAGCAAGGGCGAGGAGG
	CTTCAGCTTGGCGGTCTG
Step2	TCGGCCCGGCGGCTCCCAGTGCCGCGCGCCAAGATCCATTCGTTGGGGGATCCACCGG
	CTTCAGCTTGGCGGTCTG
Step3	GTCCGTCCTGACGCCGCTGCTGCTGCGGGGCTTGACAGGCTCGGCCCGGCGGCTCCCA
	CTTCAGCTTGGCGGTCTG
Step4	GACTCAGATCTCGAGCTCAAGCTTCGACCATGCTCGAGATGTCCGTCCTGACGCCGCT
	CTTCAGCTTGGCGGTCTG
Step5	TTAGTGAACCGTCAGATCCGCTAGCGCTACCGGACTCAGATCTCGAGCTCAAGCTTCG
	CTTCAGCTTGGCGGTCTG
pet28a-SUMO-SELO (C667A)
Site directed mutageneis using the following primers and pet28a-SUMO-SELO as template.
Step1	GCAGAACTGTGCGTGACAGCTTCTTCGTAACTCGAGCA
	TGCTCGAGTTACGAAGAAGCTGTCACGCACAGTTCTGC
pet28a-SUMO-SELO (R253E)
Site directed mutageneis using the following primers and pet28a-SUMO-SELO as template.
Step1	GTTGCGTGTAGCTTCCACTTTCATAGAGTTTGGATCCTTTGAGATTTTTAAG
	CTTAAAAATCTCAAAGGATCCAAACTCTATGAAAGTGGAAGCTACACGCAAC
