# Supplementary material for: Hydrolyzing NAD to NMN and AMP by SelO is Required for Mitochondria Homeostasis
Source: Research Square preprint supplement (doi:10.21203/rs.3.rs-5137152/v1), 2024-10-17
Supplement: Supplementary file 6 [file fee7910ce1f986459ca2acc1.xlsx]

## Sheet: Sheet1
Gene ID	Gene Symbol	Type	Ctrl1 TPM	Ctrl2 TPM	Ctrl3 TPM	shSelo1 TPM	shSelo2 TPM	shSelo3 TPM	shSelo Average TPM	Ctrl Average TPM	Ctrl1 FPKM	Ctrl2 FPKM	Ctrl3 FPKM	shSelo1 FPKM	shSelo2 FPKM	shSelo3 FPKM	shSelo Average FPKM	Ctrl Average FPKM	Ctrl1 Read Count	Ctrl2 Read Count	Ctrl3 Read Count	shSelo1 Read Count	shSelo2 Read Count	shSelo3 Read Count	shSelo Average Read Count	Ctrl Average Read Count	log2 (shSelo / Ctrl)	Pvalue(shSelo / Ctrl)	Qvalue (shSelo / Ctrl)
1	'A1BG'	mRNA	0.03	0	0	0	0.06	0.03	0.03	0.01	0.02	0	0	0	0.04	0.02	0.02	0.00666667	1	0	0	0	2	1	1	0.333333	1.45492	0.542961	0.999443
100	'ADA'	mRNA	44.88	50.18	39.59	43.4	40.51	44.61	42.84	44.8833	32.54	37.31	29.07	30.74	29.59	32.61	30.98	32.9733	610	724	531	601	567	628	598.667	621.667	-0.0932324	0.399082	0.999443
1000	'CDH2'	mRNA	14.52	11.61	14.03	13.57	14.86	12.28	13.57	13.3867	10.53	8.63	10.3	9.61	10.85	8.98	9.81333	9.82	548	449	554	513	560	485	519.333	517	-0.0346463	0.761169	0.999443
10000	'AKT3'	mRNA	6.14	4.01	6.44	6.76	5.65	6.8	6.40333	5.53	4.45	2.98	4.73	4.79	4.12	4.97	4.62667	4.05333	360	284	376	372	346	337	351.667	340	0.00614991	0.961864	0.999443
10001	'MED6'	mRNA	11.1	8.22	9.49	10.39	9.85	10.11	10.1167	9.60333	8.05	6.11	6.97	7.36	7.19	7.39	7.31333	7.04333	256	201	213	245	233	242	240	223.333	0.0630935	0.653699	0.999443
10003	'NAALAD2'	mRNA	0	0	0.03	0	0	0	0	0.01	0	0	0.02	0	0	0	0	0.00666667	0	0	1	0	0	0	0	0.333333	-1.0023	0.805965	0.999443
100037417	'DDTL'	mRNA	5.01	5.55	4.72	4.3	4.76	5.91	4.99	5.09333	3.63	4.13	3.47	3.04	3.48	4.32	3.61333	3.74333	87.97	109.14	84.79	79.36	93.41	113.01	95.26	93.9667	-0.0115778	0.956997	0.999443
10004	'NAALADL1'	mRNA	0.05	0	0	0	0	0.03	0.01	0.0166667	0.04	0	0	0	0	0.02	0.00666667	0.0133333	1	0	0	0	0	1	0.333333	0.333333	-0.0405184	0.990083	0.999443
10005	'ACOT8'	mRNA	54.74	58.23	56.38	56.91	60.47	59.32	58.9	56.45	39.69	43.29	41.4	40.31	44.16	43.37	42.6133	41.46	530	601	540	566	603	597	588.667	557	0.0403923	0.683944	0.999443
10006	'ABI1'	mRNA	11.92	10.72	12.69	13.46	12.69	11.99	12.7133	11.7767	8.64	7.97	9.31	9.53	9.27	8.76	9.18667	8.64	421	409	449	478	454	440	457.333	426.333	0.059734	0.571348	0.999443
10007	'GNPDA1'	mRNA	37.83	29.54	33.36	39.49	33.77	32.65	35.3033	33.5767	27.43	21.96	24.49	27.96	24.66	23.87	25.4967	24.6267	843	702	737	902	774	755	810.333	760.667	0.0489821	0.618895	0.999443
10009	'ZBTB33'	mRNA	7.68	6.33	8.21	7.38	6.64	6.34	6.78667	7.40667	5.57	4.71	6.03	5.23	4.85	4.63	4.90333	5.43667	416	364	441	407	370	356	377.667	407	-0.150361	0.198564	0.999443
1001	'CDH3'	mRNA	0.19	0.17	0.06	0.12	0.14	0.06	0.106667	0.14	0.14	0.12	0.04	0.08	0.1	0.04	0.0733333	0.1	7	6	2	4	5	2	3.66667	5	-0.484859	0.598117	0.999443
10010	'TANK'	mRNA	21.62	18.92	21.09	22.56	23.57	20.04	22.0567	20.5433	15.67	14.07	15.49	15.98	17.21	14.65	15.9467	15.0767	428	402	422	462	483	415	453.333	417.333	0.0785089	0.469724	0.999443
100101267	'POM121C'	mRNA	33.33	30.93	32.57	36.65	35.13	33.29	35.0233	32.2767	24.17	22.99	23.91	25.95	25.65	24.34	25.3133	23.69	2064.47	2038.39	2003.96	2316.38	2243.87	2139.25	2233.17	2035.61	0.0928581	0.165065	0.999443
100101467	'ZSCAN30'	mRNA	1.16	1.12	1.52	0.9	1.02	1.04	0.986667	1.26667	0.84	0.84	1.11	0.63	0.74	0.76	0.71	0.93	49	51	64	39	45	43	42.3333	54.6667	-0.409604	0.140645	0.999443
10011	'SRA1'	mRNA	54.47	55.31	51.64	52.04	53.11	54.32	53.1567	53.8067	39.49	41.12	37.92	36.85	38.78	39.71	38.4467	39.51	823	905	753	804	847	847	832.667	827	-0.0290423	0.752357	0.999443
100113407	'TMEM170B'	mRNA	0.8	0.64	1.08	0.75	0.53	0.44	0.573333	0.84	0.58	0.48	0.79	0.53	0.39	0.33	0.416667	0.616667	76	65	102	73	52	44	56.3333	81	-0.570525	0.0283267	0.999443
100125288	'ZGLP1'	mRNA	1	0.84	0.8	0.98	0.97	0.81	0.92	0.88	0.73	0.63	0.59	0.7	0.71	0.59	0.666667	0.65	19	17	15	19	19	16	18	17	0.0419673	0.92491	0.999443
100127983	'C8orf88'	mRNA	0.25	0	0.12	0.23	0	0	0.0766667	0.123333	0.18	0	0.09	0.16	0	0	0.0533333	0.09	2	0	1	2	0	0	0.666667	1	-0.652157	0.767344	0.999443
100128071	'FAM229A'	mRNA	7.08	4.91	3	6.56	4.85	5.8	5.73667	4.99667	5.14	3.65	2.2	4.64	3.54	4.24	4.14	3.66333	34	25	14	32	24	29	28.3333	24.3333	0.179863	0.646206	0.999443
100128108	'LOC100128108'	mRNA	0.35	0.73	0.69	0.26	0.32	0.81	0.463333	0.59	0.25	0.55	0.51	0.19	0.24	0.59	0.34	0.436667	1	4	2	1	1	5	2.33333	2.33333	-0.0309077	0.98044	0.999443
100128327	'TRAPPC3L'	mRNA	1.31	1.83	2.42	2.79	1.74	1.91	2.14667	1.85333	0.95	1.36	1.77	1.98	1.27	1.4	1.55	1.36	35	52	64	76	48	53	59	50.3333	0.18319	0.524134	0.999443
100128553	'CTAGE4'	mRNA	0.09	0.25	0.39	0.1	0.2	0.13	0.143333	0.243333	0.06	0.19	0.28	0.07	0.15	0.1	0.106667	0.176667	2.26	7	10	2.76	5.42	3.63	3.93667	6.42	-0.965392	0.285947	0.999443
100128569	'C19orf71'	mRNA	0	0.26	0	0.22	0	0	0.0733333	0.0866667	0	0.19	0	0.16	0	0	0.0533333	0.0633333	0	1	0	1	0	0	0.333333	0.333333	-0.0405186	0.990168	0.999443
100128731	'OST4'	mRNA	1015.19	984.25	1477.25	958.02	1004.2	895.81	952.677	1158.9	736.09	731.77	1084.61	678.48	733.29	654.85	688.873	850.823	2019	2065	2781	1925	2054	1868	1949	2288.33	-0.273888	0.0116188	0.999443
100128908	'LMLN2'	mRNA	0	0	0	0	0.04	0.04	0.0266667	0	0	0	0	0	0.03	0.03	0.02	0	0	0	0	0	1	1	0.666667	0	1.83293	0.568707	0.999443
100128927	'ZBTB42'	mRNA	2.81	3.12	2.72	3.26	3.12	2.72	3.03333	2.88333	2.04	2.32	2	2.31	2.28	1.99	2.19333	2.12	105	123	102	125	119	105	116.333	110	0.0401009	0.82914	0.999443
100129128	'KHDC1L'	mRNA	0	0.41	0	0	0	0.42	0.14	0.136667	0	0.31	0	0	0	0.31	0.103333	0.103333	0	2	0	0	0	2	0.666667	0.666667	-0.0155859	0.99512	0.999443
100129239	'CXorf51A'	mRNA	0.51	0	0	0	0.5	0.49	0.33	0.17	0.37	0	0	0	0.36	0.36	0.24	0.123333	1	0	0	0	1	1	0.666667	0.333333	0.869133	0.743554	0.999443
100129250	'SMIM27'	mRNA	10.45	8.8	9.07	10.57	8.22	10.81	9.86667	9.44	7.58	6.54	6.66	7.48	6	7.91	7.13	6.92667	37	33	31	38	30	40	36	33.6667	0.055867	0.86204	0.999443
100129361	'SMIM10L1'	mRNA	12.72	11.54	12.85	11.63	13.24	13.75	12.8733	12.37	9.22	8.58	9.43	8.24	9.67	10.05	9.32	9.07667	641	619	643	598	688	719	668.333	634.333	0.0364033	0.723059	0.999443
100129396	'FAM106C'	mRNA	0	0.06	0.1	0	0	0	0	0.0533333	0	0.04	0.07	0	0	0	0	0.0366667	0	1	1.6	0	0	0	0	0.866667	-1.90011	0.552356	0.999443
100129480	'MKRN2OS'	mRNA	0.14	0	0.13	0	0	0.1	0.0333333	0.09	0.1	0	0.1	0	0	0.08	0.0266667	0.0666667	2	0	1.85	0	0	1	0.333333	1.28333	-1.52454	0.522676	0.999443
100129484	'LOC100129484'	mRNA	0.34	0.32	0.54	0.33	0.48	0.44	0.416667	0.4	0.25	0.24	0.39	0.24	0.35	0.32	0.303333	0.293333	9	9	14	9	13	12	11.3333	10.6667	0.0474426	0.933411	0.999443
100129528	'MUC8'	mRNA	0.09	0.13	0	0.18	0.18	0.13	0.163333	0.0733333	0.07	0.1	0	0.13	0.13	0.1	0.12	0.0566667	2	3	0	4	4	3	3.66667	1.66667	1.10208	0.359357	0.999443
100129583	'FAM47E'	mRNA	0	0.07	0	0	0	0.06	0.02	0.0233333	0	0.05	0	0	0	0.05	0.0166667	0.0166667	0	1	0	0	0	1	0.333333	0.333333	-0.0405185	0.990099	0.999443
100129654	'TCF24'	mRNA	0.04	0.04	0	0	0.2	0.08	0.0933333	0.0266667	0.03	0.03	0	0	0.15	0.06	0.07	0.02	1	1	0	0	5	2	2.33333	0.666667	1.78677	0.306276	0.999443
100129792	'CCDC152'	mRNA	0	0	0	0	0.03	0	0.01	0	0	0	0	0	0.02	0	0.00666667	0	0	0	0	0	1	0	0.333333	0	0.92125	0.82138	0.999443
100129842	'ZNF737'	mRNA	0.01	0	0.02	0.02	0	0.04	0.02	0.01	0.01	0	0.02	0.02	0	0.03	0.0166667	0.01	1	0	2	2	0	4	2	1	0.952024	0.565363	0.999443
100129924	'TMEM269'	mRNA	0.06	0	0.06	0.03	0.03	0.17	0.0766667	0.04	0.04	0	0.04	0.02	0.02	0.12	0.0533333	0.0266667	2	0	2	1	1	6	2.66667	1.33333	0.963252	0.500083	0.999443
10013	'HDAC6'	mRNA	28.74	29.3	28.44	26.78	27.71	28.92	27.8033	28.8267	20.84	21.79	20.88	18.97	20.23	21.14	20.1133	21.17	1223	1324	1192	1153	1211	1266	1210	1246.33	-0.0817654	0.320752	0.999443
100130274	'CCDC166'	mRNA	0.09	0	0	0	0	0	0	0.03	0.06	0	0	0	0	0	0	0.02	1	0	0	0	0	0	0	0.333333	-1.0023	0.805965	0.999443
100130302	'SUPT20HL1'	mRNA	0	0	0	0	0	0.02	0.00666667	0	0	0	0	0	0	0.01	0.00333333	0	0	0	0	0	0	1	0.333333	0	0.92125	0.82138	0.999443
100130311	'C17orf107'	mRNA	0.15	0.43	0.22	0.3	0.21	0.06	0.19	0.266667	0.11	0.32	0.16	0.21	0.15	0.04	0.133333	0.196667	5	15	7	10	7	2	6.33333	9	-0.55105	0.454168	0.999443
100130519	'TMEM221'	mRNA	0.28	0.23	0.14	0.32	0.1	0.05	0.156667	0.216667	0.2	0.17	0.1	0.23	0.07	0.04	0.113333	0.156667	4	4	2	5	2	1	2.66667	3.33333	-0.369675	0.735831	0.999443
100130705	'ATP6V1FNB'	mRNA	0.12	0	0.13	0.07	0.1	0.12	0.0966667	0.0833333	0.09	0	0.09	0.05	0.07	0.09	0.07	0.06	5	0	5	3	4	5	4	3.33333	0.220401	0.831047	0.999443
100130733	'LRRC70'	mRNA	0.24	0.09	0.05	0.09	0.32	0.14	0.183333	0.126667	0.17	0.07	0.04	0.07	0.24	0.1	0.136667	0.0933333	5	2	1	2	7	3	4	2.66667	0.553889	0.604283	0.999443
100130742	'LRRC69'	mRNA	0	0	0.17	0	0	0.08	0.0266667	0.0566667	0	0	0.13	0	0	0.06	0.02	0.0433333	0	0	2	0	0	1	0.333333	0.666667	-0.952451	0.734661	0.999443
100130827	'SBK3'	mRNA	0.99	1.42	1.64	1.86	1.62	1.39	1.62333	1.35	0.72	1.06	1.2	1.32	1.18	1.01	1.17	0.993333	12	20	20	25	22	19	22	17.3333	0.301372	0.484594	0.999443
100130890	'TSTD3'	mRNA	2.8	6.25	7.11	6.18	4.29	3.32	4.59667	5.38667	2.03	4.65	5.22	4.38	3.13	2.43	3.31333	3.96667	22	38	34	34	31	21	28.6667	31.3333	-0.170983	0.636903	0.999443
100130933	'SMIM6'	mRNA	0.1	0	0	0	0.1	0.3	0.133333	0.0333333	0.07	0	0	0	0.07	0.22	0.0966667	0.0233333	1	0	0	0	1	3	1.33333	0.333333	1.87001	0.401544	0.999443
100130958	'SYCE1L'	mRNA	0	0.11	0	0	0	0.26	0.0866667	0.0366667	0	0.08	0	0	0	0.19	0.0633333	0.0266667	0	1	0	0	0	2	0.666667	0.333333	0.869422	0.758501	0.999443
100131017	'ZNF316'	mRNA	12.29	13.88	11.45	12.84	14.09	13.73	13.5533	12.54	8.91	10.32	8.41	9.09	10.29	10.04	9.80667	9.21333	727	861	668	780	829	835	814.667	752	0.0771059	0.443817	0.999443
100131211	'NEMP2'	mRNA	3.58	2.89	3.54	3.37	3.26	3.07	3.23333	3.33667	2.6	2.15	2.6	2.39	2.38	2.25	2.34	2.45	129	114	129	142	124	122	129.333	124	0.0185906	0.915779	0.999443
100131244	'ANKRD63'	mRNA	0.34	0.26	0.14	0.49	0.27	0.29	0.35	0.246667	0.25	0.19	0.1	0.35	0.19	0.21	0.25	0.18	15	12	6	22	12	13	15.6667	11	0.466981	0.388019	0.999443
100131378	'C11orf91'	mRNA	0.13	0.4	0.29	0.42	0.57	0.26	0.416667	0.273333	0.1	0.3	0.21	0.3	0.42	0.19	0.303333	0.203333	2	3	2	3	5	3	3.66667	2.33333	0.615323	0.566683	0.999443
100131390	'SP9'	mRNA	0	0.04	0.08	0.04	0.04	0	0.0266667	0.04	0	0.03	0.06	0.03	0.03	0	0.02	0.03	0	1	2	1	1	0	0.666667	1	-0.636684	0.761396	0.999443
100131539	'ZNF705E'	mRNA	0.09	0.03	0	0.03	0	0.03	0.02	0.04	0.06	0.02	0	0.02	0	0.02	0.0133333	0.0266667	3	1	0	1	0	1	0.666667	1.33333	-1.04052	0.598901	0.999443
100131801	'PET100'	mRNA	67.47	66.62	75.58	65.92	71.19	68.17	68.4267	69.89	48.92	49.53	55.49	46.68	51.99	49.83	49.5	51.3133	297	311	323	295	323	313	310.333	310.333	-0.040001	0.742315	0.999443
100131827	'ZNF717'	mRNA	3.27	3.73	3.45	3.91	3.22	4.18	3.77	3.48333	2.37	2.78	2.54	2.77	2.35	3.05	2.72333	2.56333	76	78	75	80	73	90	81	76.3333	0.0454302	0.834759	0.999443
100132015	'TEX13D'	mRNA	0	0	0	0.02	0	0	0.00666667	0	0	0	0	0.02	0	0	0.00666667	0	0	0	0	1	0	0	0.333333	0	0.92125	0.82138	0.999443
100132074	'FOXO6'	mRNA	25.17	26.74	24.2	24.6	26.41	28.01	26.34	25.37	18.25	19.88	17.77	17.42	19.29	20.47	19.06	18.6333	729	824	695	727	789	842	786	749.333	0.0305962	0.75708	0.999443
100132247	'NPIPB5'	mRNA	23.6	31.32	29.63	27.22	24.94	24.41	25.5233	28.1833	17.11	23.29	21.76	19.28	18.21	17.85	18.4467	20.72	926.84	1308.92	1155.09	1090.74	1010.09	994.87	1031.9	1130.28	-0.172326	0.103889	0.999443
100132406	'NBPF10'	mRNA	3.03	2.32	2.66	2.62	2.59	2.8	2.67	2.67	2.19	1.73	1.95	1.86	1.89	2.05	1.93333	1.95667	420.26	345.5	367.34	373.67	369.69	404.55	382.637	377.7	-0.0224533	0.849315	0.999443
100132565	'GOLGA8F'	mRNA	0	0	0.04	0.04	0	0.04	0.0266667	0.0133333	0	0	0.03	0.03	0	0.03	0.02	0.01	0	0	1	1	0	1	0.666667	0.333333	0.84846	0.750029	0.999443
100132911	'DPH3P1'	mRNA	0.33	0.19	0.2	0.46	0.32	0.32	0.366667	0.24	0.24	0.14	0.15	0.32	0.24	0.23	0.263333	0.176667	5	3	3	7	5	5	5.66667	3.66667	0.585054	0.499083	0.999443
100133053	'CXorf51B'	mRNA	0	0	0	0.95	0	0	0.316667	0	0	0	0	0.67	0	0	0.223333	0	0	0	0	2	0	0	0.666667	0	1.78442	0.614213	0.999443
100133093	'FAM25G'	mRNA	0	1.03	0	0	1.06	1.03	0.696667	0.343333	0	0.77	0	0	0.77	0.75	0.506667	0.256667	0	1	0	0	1	1	0.666667	0.333333	0.869145	0.743771	0.999443
100133204	'C9orf147'	mRNA	0.09	0.17	0.15	0.09	0.17	0.14	0.133333	0.136667	0.06	0.12	0.11	0.06	0.12	0.1	0.0933333	0.0966667	3	6	5	3	6	5	4.66667	4.66667	-0.0358412	0.966893	0.999443
100133220	'GOLGA6L3'	mRNA	0.08	0.24	0.08	0.2	0	0.18	0.126667	0.133333	0.06	0.18	0.06	0.14	0	0.13	0.09	0.1	1.36	4.17	1.24	3.23	0	3.1	2.11	2.25667	-0.0414002	0.976176	0.999443
100133315	'LOC100133315'	mRNA	0.82	0.86	0.56	0.69	0.8	0.66	0.716667	0.746667	0.6	0.64	0.41	0.49	0.58	0.48	0.516667	0.55	13	10	13	13	20	15	16	12	0.376175	0.456978	0.999443
100133941	'CD24'	mRNA	56.92	42.29	60.06	51.24	46.48	43.12	46.9467	53.09	41.27	31.44	44.09	36.29	33.94	31.52	33.9167	38.9333	1256	998	1306	1139	1057	993.09	1063.03	1186.67	-0.201777	0.0494087	0.999443
100134444	'KCNJ18'	mRNA	0.23	0.33	0.36	0.15	0.37	0.28	0.266667	0.306667	0.17	0.24	0.27	0.1	0.27	0.21	0.193333	0.226667	8.79	12.44	13.69	5.73	14.59	11.22	10.5133	11.64	-0.172582	0.773576	0.999443
100134934	'TEN1'	mRNA	35.84	34.58	27.68	39.32	33.4	34.21	35.6433	32.7	25.99	25.71	20.32	27.85	24.39	25	25.7467	24.0067	281	288	213	314	270	279	287.667	260.667	0.101925	0.457816	0.999443
100134938	'UPK3BL1'	mRNA	20.49	27.06	23.18	24.52	18.98	21.61	21.7033	23.5767	14.85	20.12	17.02	17.37	13.86	15.8	15.6767	17.33	243.96	342.56	272.2	297.64	233.09	267.44	266.057	286.24	-0.145938	0.312159	0.999443
100137047	'JMJD7'	mRNA	10.37	7.01	7.11	6.58	7.1	7.21	6.96333	8.16333	7.52	5.21	5.22	4.66	5.19	5.27	5.04	5.98333	131.12	94.21	88.75	84.79	92.64	94.71	90.7133	104.693	-0.252118	0.233139	0.999443
100137049	'PLA2G4B'	mRNA	4.12	3.51	1.56	3.66	4.41	2.83	3.63333	3.06333	2.99	2.61	1.14	2.59	3.22	2.07	2.62667	2.24667	112.52	101.95	42.15	102.06	124.08	80.3	102.147	85.54	0.226898	0.407725	0.999443
10014	'HDAC5'	mRNA	21.04	20.91	20.15	21.13	20.65	21.5	21.0933	20.7	15.25	15.54	14.8	14.96	15.08	15.72	15.2533	15.1967	1179	1244	1120	1208	1193	1249	1216.67	1181	0.00319032	0.967546	0.999443
100141515	'C17orf99'	mRNA	0	0	0	0	0.08	0	0.0266667	0	0	0	0	0	0.06	0	0.02	0	0	0	0	0	1	0	0.333333	0	0.92125	0.82138	0.999443
100142659	'CTAGE8'	mRNA	0.12	0	0	0.13	0.05	0	0.06	0.04	0.09	0	0	0.09	0.04	0	0.0433333	0.03	3.74	0	0	4.24	1.58	0	1.94	1.24667	0.679155	0.713276	0.999443
100144748	'KLLN'	mRNA	0.68	0.49	0.57	0.77	0.66	0.7	0.71	0.58	0.49	0.36	0.42	0.55	0.48	0.51	0.513333	0.423333	30	23	25	35	30	32	32.3333	26	0.272928	0.434612	0.999443
10015	'PDCD6IP'	mRNA	25.21	22.2	26.81	25.92	23.86	23.91	24.5633	24.74	18.28	16.51	19.69	18.36	17.42	17.48	17.7533	18.16	1520	1435	1614	1561	1534	1533	1542.67	1523	-0.0227374	0.770349	0.999443
10016	'PDCD6'	mRNA	338.84	328.09	300.43	316.36	317.83	310.41	314.867	322.453	245.68	243.93	220.58	224.05	232.09	226.91	227.683	236.73	3133	3224	2734	2985	3033	2982	3000	3030.33	-0.0537397	0.45904	0.999443
10017	'BCL2L10'	mRNA	0	0	0	0.09	0	0	0.03	0	0	0	0	0.06	0	0	0.02	0	0	0	0	1	0	0	0.333333	0	0.92125	0.82138	0.999443
100170229	'SRRM5'	mRNA	0.17	0.2	0.47	0.25	0.33	0.28	0.286667	0.28	0.12	0.15	0.34	0.18	0.24	0.21	0.21	0.203333	4	5	11	6	8	7	7	6.66667	0.0275116	0.96992	0.999443
100170841	'EPOP'	mRNA	17.91	19.08	18.08	19.42	19.95	18.77	19.38	18.3567	12.98	14.18	13.28	13.75	14.57	13.72	14.0133	13.48	592	671	593	655	680	644	659.667	618.667	0.0528279	0.57822	0.999443
10018	'BCL2L11'	mRNA	14.32	14.5	12.72	15.43	14.96	14.77	15.0533	13.8467	10.38	10.78	9.34	10.93	10.93	10.8	10.8867	10.1667	443	495	494	512	463	478	484.333	477.333	-0.0203655	0.843837	0.999443
100188893	'TOMM6'	mRNA	181.32	154.58	185.42	175.1	168.59	160.16	167.95	173.773	131.47	114.93	136.14	124.01	123.11	117.08	121.4	127.513	1181	1069	1182	1161	1132	1086	1126.33	1144	-0.0638132	0.436674	0.999443
10019	'SH2B3'	mRNA	6.38	6.63	6.42	6.53	6.69	5.64	6.28667	6.47667	4.63	4.93	4.72	4.63	4.89	4.13	4.55	4.76	364	368	350	358	369	327	351.333	360.667	-0.0782652	0.490774	0.999443
100191040	'C2CD4D'	mRNA	0.06	0.12	0	0.06	0.09	0.18	0.11	0.06	0.05	0.09	0	0.04	0.07	0.13	0.08	0.0466667	1	2	0	1	2	4	2.33333	1	1.19616	0.433834	0.999443
10020	'GNE'	mRNA	17.03	13.42	14.42	16.83	13.94	14.57	15.1133	14.9567	12.34	9.97	10.58	11.92	10.18	10.65	10.9167	10.9633	810	653	743	813	701	688	734	735.333	-0.0452212	0.658295	0.999443
10021	'HCN4'	mRNA	0	0	0	0	0.01	0	0.00333333	0	0	0	0	0	0.01	0	0.00333333	0	0	0	0	0	1	0	0.333333	0	0.92125	0.82138	0.999443
10023	'FRAT1'	mRNA	4.41	4.36	3.34	4.84	4.27	5.05	4.72	4.03667	3.2	3.24	2.45	3.43	3.12	3.69	3.41333	2.96333	116	122	87	130	116	138	128	108.333	0.201489	0.28754	0.999443
10024	'TROAP'	mRNA	264.53	290.33	269.36	248.53	260.01	247.96	252.167	274.74	191.8	215.86	197.76	176.02	189.86	181.26	182.38	201.807	2164	2571	2137	2188	2283	2219	2230	2290.67	-0.0777347	0.333593	0.999443
10025	'MED16'	mRNA	8.09	8.32	7.52	9.56	7.82	7.43	8.27	7.97667	5.87	6.19	5.52	6.77	5.71	5.43	5.97	5.86	233	254	214	282	233	224	246.333	233.667	0.0344936	0.803108	0.999443
10026	'PIGK'	mRNA	11.79	9.53	12.35	12.49	10.48	11.68	11.55	11.2233	8.55	7.08	9.07	8.85	7.65	8.54	8.34667	8.23333	565	486	588	611	518	581	570	546.333	0.0187318	0.862227	0.999443
100271715	'ARHGEF33'	mRNA	0.08	0.2	0.11	0.16	0.17	0.25	0.193333	0.13	0.06	0.15	0.08	0.11	0.12	0.18	0.136667	0.0966667	4	10	5	8	8	14	10	6.33333	0.623571	0.36002	0.999443
100271846	'ERVV-2'	mRNA	0.38	0.4	0.4	0.1	0.3	0.36	0.253333	0.393333	0.28	0.3	0.29	0.07	0.22	0.26	0.183333	0.29	11.63	12.99	12.01	3.23	9.47	11.31	8.00333	12.21	-0.63943	0.307952	0.999443
100271849	'MEF2B'	mRNA	3.81	5.65	3.13	3.24	2.76	4.68	3.56	4.19667	2.76	4.2	2.29	2.3	2.01	3.42	2.57667	3.08333	48.81	77.06	39.56	42.39	36.48	62.38	47.0833	55.1433	-0.264284	0.393432	0.999443
100271927	'RASA4B'	mRNA	18.47	22.49	17.15	18.01	20.57	25.19	21.2567	19.37	13.4	16.72	12.59	12.75	15.02	18.41	15.3933	14.2367	675.92	875.15	665.39	675.4	803	951.01	809.803	738.82	0.0970732	0.450281	0.999443
100272147	'CMC4'	mRNA	13.83	15.29	12.57	12.49	18.6	16.5	15.8633	13.8967	10.03	11.37	9.23	8.84	13.59	12.06	11.4967	10.21	94.19	110.61	83.89	86.6	130.64	116.99	111.41	96.23	0.174116	0.411528	0.999443
100287036	'LOC100287036'	mRNA	0	0.22	0	0.11	0.33	0.22	0.22	0.0733333	0	0.16	0	0.08	0.24	0.16	0.16	0.0533333	0	3	0	1	3	3	2.33333	1	1.19927	0.450153	0.999443
100287045	'FAM90A26'	mRNA	0.16	0.08	0	0	0.16	0.08	0.08	0.08	0.12	0.06	0	0	0.11	0.06	0.0566667	0.06	2	1	0	0	2	0.98	0.993333	1	-0.607111	0.782139	0.999443
100287171	'WASHC1'	mRNA	102.5	109.56	100.6	100.97	107.37	111.07	106.47	104.22	74.32	81.46	73.86	71.51	78.41	81.2	77.04	76.5467	2708	2900	2546	2617	2614	2783	2671.33	2718	-0.0642398	0.372022	0.999443
100287178	'USP17L11'	mRNA	0	0.02	0	0	0.04	0	0.0133333	0.00666667	0	0.02	0	0	0.03	0	0.01	0.00666667	0	0.33	0	0	0.67	0	0.223333	0.11
100287284	'MANSC4'	mRNA	0.14	0.12	0.46	0.58	0.25	0.43	0.42	0.24	0.1	0.09	0.34	0.41	0.19	0.32	0.306667	0.176667	2	2	7	9	4	7	6.66667	3.66667	0.811739	0.349864	0.999443
100287364	'USP17L18'	mRNA	0	0.02	0	0	0.04	0	0.0133333	0.00666667	0	0.02	0	0	0.03	0	0.01	0.00666667	0	0.33	0	0	0.67	0	0.223333	0.11
100287441	'USP17L20'	mRNA	0	0.02	0	0	0.04	0	0.0133333	0.00666667	0	0.02	0	0	0.03	0	0.01	0.00666667	0	0.33	0	0	0.67	0	0.223333	0.11
100287482	'SMKR1'	mRNA	1.54	1.45	1.05	1.82	0.75	2.23	1.6	1.34667	1.12	1.08	0.77	1.29	0.55	1.63	1.15667	0.99	12	12	8	14	6	18	12.6667	10.6667	0.207685	0.718134	0.999443
100287718	'ANKRD66'	mRNA	0.15	0.21	0.15	0.22	0.22	0.11	0.183333	0.17	0.11	0.16	0.11	0.16	0.16	0.08	0.133333	0.126667	2	2	2	2	2	1	1.66667	2	-0.305664	0.820198	0.999443
100287896	'LOC100287896'	mRNA	0.82	1.04	1.67	1.2	1.45	1.38	1.34333	1.17667	0.59	0.77	1.22	0.85	1.06	1.01	0.973333	0.86	20	27	38	30	33	35	32.6667	28.3333	0.163902	0.646097	0.999443
100287898	'TTC34'	mRNA	0.05	0	0	0.02	0.03	0	0.0166667	0.0166667	0.04	0	0	0.01	0.02	0	0.01	0.0133333	3	0	0	1	2	0	1	1	-0.0370987	0.985482	0.999443
100287932	'TIMM23'	mRNA	188.43	158.39	188.69	183.4	160.11	163.2	168.903	178.503	136.62	117.76	138.54	129.89	116.92	119.3	122.037	130.973	1927.24	1721.67	1900.42	1911.55	1688.47	1735.26	1778.43	1849.78	-0.0988933	0.203279	0.999443
100288142	'NBPF20'	mRNA	1.92	1.58	1.6	2.11	1.62	1.86	1.86333	1.7	1.39	1.18	1.18	1.49	1.19	1.36	1.34667	1.25	385.84	338.7	320.7	432.33	336.87	388.55	385.917	348.413	0.106589	0.384661	0.999443
100288332	'NPIPA5'	mRNA	19.89	20.78	17.25	23.41	19.18	19.53	20.7067	19.3067	14.42	15.45	12.66	16.58	14.01	14.27	14.9533	14.1767	204.26	227.78	173.76	235.27	199.4	206.38	213.683	201.933	0.0429133	0.771256	0.999443
100288695	'LIMS4'	mRNA	0.76	1.05	1.05	1.18	0.96	0.77	0.97	0.953333	0.55	0.78	0.77	0.83	0.7	0.56	0.696667	0.7	11.42	13.83	15.06	15.06	15.14	15.97	15.39	13.4367	0.165195	0.73975	0.999443
100288797	'TMEM239'	mRNA	0.21	0.07	0.07	0.07	0.13	0.15	0.116667	0.116667	0.15	0.05	0.05	0.05	0.1	0.11	0.0866667	0.0833333	3	3	2	2	3	3	2.66667	2.66667	-0.0359728	0.974365	0.999443
100288801	'FRG2C'	mRNA	0.05	0.17	0.05	0	0	0	0	0.09	0.03	0.12	0.03	0	0	0	0	0.06	1	3.85	1	0	0	0	0	1.95	-3.21478	0.137667	0.999443
100289187	'TMEM225B'	mRNA	0.22	0.11	0.12	0.24	0.03	0.2	0.156667	0.15	0.16	0.08	0.09	0.17	0.02	0.15	0.113333	0.11	4.11	8.3	1	4.26	2.09	4.45	3.6	4.47	-0.41452	0.677617	0.999443
100289279	'CNTNAP3C'	mRNA	0.2	0.23	0.13	0.2	0.27	0.3	0.256667	0.186667	0.14	0.17	0.1	0.14	0.2	0.22	0.186667	0.136667	2.82	3.56	1.87	2.88	4	5.65	4.17667	2.75	0.843351	0.455488	0.999443
100289561	'LOC100289561'	mRNA	13.98	18.07	13.21	14.74	14.36	15.83	14.9767	15.0867	10.14	13.44	9.7	10.44	10.48	11.57	10.83	11.0933	128.73	178.62	117.83	137.47	135.19	152.66	141.773	141.727	-0.0347477	0.849984	0.999443
100289635	'ZNF605'	mRNA	0.84	0.82	0.71	0.81	0.83	0.72	0.786667	0.79	0.61	0.61	0.52	0.57	0.61	0.53	0.57	0.58	84.03	87.88	70.95	82.76	86	74.88	81.2133	80.9533	-0.0337281	0.876214	0.999443
100289678	'ZNF783'	mRNA	2.98	2.68	2.86	3.44	3.11	3.29	3.28	2.84	2.16	2	2.1	2.44	2.27	2.41	2.37333	2.08667	137	131	130	161	147	157	155	132.667	0.183581	0.261443	0.999443
100293516	'ZNF587B'	mRNA	1.93	1.93	1.82	2.28	1.58	1.81	1.89	1.89333	1.4	1.43	1.34	1.61	1.15	1.33	1.36333	1.39	117.71	123.66	110.69	142.1	99.63	109.98	117.237	117.353	-0.0428316	0.82064	0.999443
100293534	'C4B_2'	mRNA	0.23	0.28	0.15	0	0	0.57	0.19	0.22	0.17	0.21	0.11	0	0	0.42	0.14	0.163333	13.09	17.02	8.69	0	0	33.85	11.2833	12.9333	-0.220749	0.922794	0.999443
1003	'CDH5'	mRNA	6.15	5.36	5.36	7.06	6.31	6.67	6.68	5.62333	4.46	3.99	3.93	5	4.61	4.88	4.83	4.12667	258	239	223	302	273	290	288.333	240	0.224011	0.0806401	0.999443
100302652	'GPR75-ASB3'	mRNA	0.58	0.71	1.34	0	0.65	0	0.216667	0.876667	0.42	0.53	0.98	0	0.47	0	0.156667	0.643333	11.12	14.46	25.18	0	12.72	0	4.24	16.92	-2.08592	0.270136	0.999443
100302736	'TMED7-TICAM2'	mRNA	2.72	2.44	3.04	2.62	2.52	2.52	2.55333	2.73333	1.97	1.81	2.23	1.86	1.84	1.84	1.84667	2.00333	104.98	100.75	116.21	102.71	100.19	100.61	101.17	107.313	-0.124826	0.51408	0.999443
100303755	'PET117'	mRNA	15.65	19.52	12.91	13.35	17.19	14.63	15.0567	16.0267	11.35	14.51	9.48	9.45	12.55	10.69	10.8967	11.78	153.32	203.2	124.48	133.26	173.66	149	151.973	160.333	-0.113386	0.546643	0.999443
100310812	'SPDYE2B'	mRNA	0.03	0.04	0	0	0.03	0	0.01	0.0233333	0.02	0.03	0	0	0.02	0	0.00666667	0.0166667	0.5	2	0	0	1.64	0	0.546667	0.833333	-0.923749	0.74387	0.999443
100310846	'ANKRD61'	mRNA	0.23	0.15	0.08	0.15	0	0.08	0.0766667	0.153333	0.17	0.11	0.06	0.11	0	0.05	0.0533333	0.113333	3	2	1	2	0	1	1	2	-1.04772	0.506038	0.999443
100316904	'SAP25'	mRNA	0.69	0.72	0.78	1.2	0.34	0.84	0.793333	0.73	0.5	0.53	0.58	0.85	0.25	0.61	0.57	0.536667	8	8	8	13	4	10	9	8	0.123778	0.851046	0.999443
10036	'CHAF1A'	mRNA	50.99	53.13	50.67	53.41	54.53	56.53	54.8233	51.5967	36.98	39.5	37.2	37.82	39.82	41.32	39.6533	37.8933	1748	1938	1723	1868	1928	2011	1935.67	1803	0.0632741	0.408691	0.999443
10038	'PARP2'	mRNA	43.37	39.66	36.78	42.61	38.37	37.97	39.65	39.9367	31.45	29.49	27	30.18	28.02	27.76	28.6533	29.3133	760	739	638	760	693	691	714.667	712.333	-0.0358198	0.703018	0.999443
100381270	'ZBED6'	mRNA	6.41	4.76	7.15	6.69	6.06	6.36	6.37	6.10667	4.65	3.54	5.25	4.74	4.42	4.65	4.60333	4.48	233	184	258	248	227	240	238.333	225	0.040521	0.785856	0.999443
10039	'PARP3'	mRNA	14.14	16.28	15.09	17.37	15.38	15.18	15.9767	15.17	10.25	12.11	11.08	12.3	11.23	11.09	11.54	11.1467	337	413	356	424	379	375	392.667	368.667	0.0499997	0.666855	0.999443
1004	'CDH6'	mRNA	0.03	0	0	0	0	0	0	0.01	0.02	0	0	0	0	0	0	0.00666667	1	0	0	0	0	0	0	0.333333	-1.0023	0.805965	0.999443
10040	'TOM1L1'	mRNA	57.24	53.58	60.5	60.57	56.27	53.97	56.9367	57.1067	41.5	39.84	44.42	42.9	41.09	39.45	41.1467	41.92	1196	1190	1255	1297	1215	1174	1228.67	1213.67	-0.0238786	0.75909	0.999443
10042	'HMGXB4'	mRNA	13.81	11.1	12.92	13.65	14.4	13.8	13.95	12.61	10.01	8.25	9.49	9.67	10.52	10.09	10.0933	9.25	584	504	544	590	629	611	610	544	0.125061	0.21516	0.999443
10043	'TOM1'	mRNA	25.52	26.97	23.35	28.21	28.22	27.88	28.1033	25.28	18.5	20.05	17.14	19.98	20.61	20.38	20.3233	18.5633	573	646	522	646	656	648	650	580.333	0.124299	0.211495	0.999443
10044	'SH2D3C'	mRNA	0.48	0.45	0.43	0.3	0.38	0.67	0.45	0.453333	0.35	0.33	0.31	0.21	0.28	0.49	0.326667	0.33	12	12	11	8	10	18	12	11.6667	0.00460542	0.993408	0.999443
10045	'SH2D3A'	mRNA	21.72	24.92	23.4	21.86	21.74	24.02	22.54	23.3467	15.75	18.53	17.18	15.48	15.88	17.56	16.3067	17.1533	424	534	435	427	445	478	450	464.333	-0.0839505	0.468296	0.999443
10046	'MAMLD1'	mRNA	11.29	11.08	12.77	14.71	14.33	12.47	13.8367	11.7133	8.19	8.24	9.38	10.42	10.46	9.11	9.99667	8.60333	553	570	621	742	731	629	700.667	581.333	0.227528	0.0233791	0.999443
100462977	'MTRNR2L1'	mRNA	298.78	321.03	241.82	280.25	294.19	305.54	293.327	287.21	216.64	238.68	177.55	198.47	214.82	223.35	212.213	210.957	4261.54	4868.56	3406.82	4075.38	4326.77	4527.33	4309.83	4178.97	0.00749254	0.939477	0.999443
100462981	'MTRNR2L2'	mRNA	17745.6	18239.5	22974.8	16995	19015	16615.6	17541.9	19653.3	12866.9	13560.7	16868.3	12036.1	13885.3	12146.3	12689.2	14431.9	145992	159404	185640	142416	161281	142195	148630	163679	-0.179931	0.0436404	0.999443
100462983	'MTRNR2L3'	mRNA	131.43	116.79	122.45	103.2	136.14	131.58	123.64	123.557	95.3	86.83	89.91	73.09	99.42	96.18	89.5633	90.68	1143.74	1079.8	1047.39	914.86	1221.49	1190.87	1109.07	1090.31	-0.0125005	0.908425	0.999443
100463285	'MTRNR2L4'	mRNA	0	0	0	0	0	0.06	0.02	0	0	0	0	0	0	0.04	0.0133333	0	0	0	0	0	0	1	0.333333	0	0.92125	0.82138	0.999443
100463289	'MTRNR2L5'	mRNA	0	0	0	0.06	0	0	0.02	0	0	0	0	0.04	0	0	0.0133333	0	0	0	0	0.99	0	0	0.33	0
100463482	'MTRNR2L6'	mRNA	30.49	31.14	24.41	24.01	31.48	31.84	29.11	28.68	22.11	23.15	17.92	17	22.99	23.28	21.09	21.06	380.92	413.56	300.85	305.8	405.57	413.45	374.94	365.11	0.00341504	0.981088	0.999443
100463486	'MTRNR2L8'	mRNA	15244.9	14766.5	19846.2	13442.3	14749.2	12955.7	13715.8	16619.2	11053.7	10978.6	14571.2	9520.05	10770.3	9470.82	9920.39	12201.2	173285	178407	222379	155732	172862	153057	160550	191357	-0.294694	0.00142389	0.44528
100463487	'MTRNR2L9'	mRNA	312.35	303.33	200.49	254.55	291.52	267.45	271.173	272.057	226.48	225.52	147.2	180.28	212.88	195.51	196.223	199.733	818.92	840.94	502.49	676.28	787.05	733.88	732.403	720.783	-0.0117301	0.960363	0.999443
100463488	'MTRNR2L10'	mRNA	51.37	45.04	39.93	42.97	47.23	41.44	43.88	45.4467	37.25	33.49	29.31	30.43	34.49	30.29	31.7367	33.35	446.47	415.89	341.07	380.44	423.19	374.57	392.733	401.143	-0.0691155	0.569956	0.999443
10048	'RANBP9'	mRNA	40	36.13	39.73	45.5	40.05	39.94	41.83	38.62	29	26.86	29.17	32.23	29.25	29.2	30.2267	28.3433	1255	1195	1214	1450	1304	1288	1347.33	1221.33	0.0999883	0.193754	0.999443
10049	'DNAJB6'	mRNA	95.48	85.03	95.88	99.54	93.24	91.73	94.8367	92.13	69.23	63.22	70.4	70.5	68.09	67.05	68.5467	67.6167	1415	1312	1380	1480	1417	1426	1441	1369	0.0329073	0.659965	0.999443
100499483	'CCDC180'	mRNA	0.85	1	0.88	0.74	0.76	0.81	0.77	0.91	0.61	0.74	0.65	0.52	0.55	0.59	0.553333	0.666667	31	44	31	28	27	34	29.6667	35.3333	-0.290647	0.389641	0.999443
1005	'CDH7'	mRNA	0	0.01	0	0	0	0	0	0.00333333	0	0.01	0	0	0	0	0	0.00333333	0	1	0	0	0	0	0	0.333333	-1.0023	0.805965	0.999443
100505385	'IQCJ-SCHIP1'	mRNA	9.3	9.87	10.18	9.15	9.55	9.93	9.54333	9.78333	6.74	7.34	7.47	6.48	6.97	7.26	6.90333	7.18333	217.93	245.93	236.24	218.72	230.61	241.48	230.27	233.367	-0.0584294	0.669246	0.999443
100505478	'TEX48'	mRNA	0	0	0.16	0	0	0	0	0.0533333	0	0	0.12	0	0	0	0	0.04	0	0	1	0	0	0	0	0.333333	-1.0023	0.805965	0.999443
100505573	'INAFM2'	mRNA	7.08	6.67	7.27	6.32	7.02	6.82	6.72	7.00667	5.13	4.96	5.34	4.47	5.13	4.99	4.86333	5.14333	216	208	215	194	215	216	208.333	213	-0.0716277	0.612344	0.999443
100505679	'UBE2Q2L'	mRNA	0	0	0	0	0.04	0.04	0.0266667	0	0	0	0	0	0.03	0.03	0.02	0	0	0	0	0	1	1	0.666667	0	1.83293	0.568707	0.999443
100505741	'SPATA1'	mRNA	0	0	0.11	0	0	0	0	0.0366667	0	0	0.08	0	0	0	0	0.0266667	0	0	1	0	0	0	0	0.333333	-1.0023	0.805965	0.999443
100505767	'SPDYE18'	mRNA	0	0.35	0.19	0.18	0.45	0	0.21	0.18	0	0.26	0.14	0.13	0.33	0	0.153333	0.133333	0	4	1.99	2	5	0	2.33333	1.99667	0.453442	0.758822	0.999443
100505876	'CEBPZOS'	mRNA	55.83	42.14	103.21	80.82	55.5	55.5	63.94	67.06	40.48	31.33	75.78	57.24	40.53	40.57	46.1133	49.1967	686.14	537	720	709.08	638	592.98	646.687	647.713	-0.0464065	0.688493	0.999443
100505989	'SMIM31'	mRNA	0.03	0.11	0	0	0	0.03	0.01	0.0466667	0.02	0.09	0	0	0	0.02	0.00666667	0.0366667	0.8	3.86	0	0	0	1	0.333333	1.55333	-1.50812	0.554419	0.999443
100506012	'PPP5D1'	mRNA	0	0.37	0.5	0.35	1.13	0.07	0.516667	0.29	0	0.27	0.37	0.25	0.82	0.05	0.373333	0.213333	0	1	2	2	3	1	2	1	0.955199	0.544286	0.999443
100506084	'ARL17B'	mRNA	9.03	6.85	12.76	6.22	10.41	11.11	9.24667	9.54667	6.55	5.09	9.37	4.4	7.61	8.12	6.71	7.00333	338.04	300.64	420.17	293.45	361.1	341.74	332.097	352.95	-0.129022	0.367184	0.999443
100506115	'PELATON'	mRNA	0.05	0.15	0.1	0.3	0	0.1	0.133333	0.1	0.04	0.11	0.08	0.22	0	0.07	0.0966667	0.0766667	1	3	2	6	0	2	2.66667	2	0.358981	0.784037	0.999443
100506127	'GVQW3'	mRNA	2.14	1.92	2.22	2.26	1.86	2.27	2.13	2.09333	1.55	1.43	1.63	1.6	1.36	1.66	1.54	1.53667	197	183	200	166	175	212	184.333	193.333	-0.108266	0.485945	0.999443
100506144	'TMEM35B'	mRNA	28.91	28	26.55	24.89	28.31	23.44	25.5467	27.82	20.96	20.81	19.49	17.63	20.67	17.13	18.4767	20.42	211	217	190	185	213	178	192	206	-0.140848	0.339899	0.999443
100506164	'HSFX1'	mRNA	0.37	0.55	0.54	0.37	0.26	0.1	0.243333	0.486667	0.27	0.41	0.4	0.26	0.19	0.07	0.173333	0.36	7	11	10	7	5	2	4.66667	9.33333	-1.0455	0.155633	0.999443
100506540	'SPTY2D1OS'	mRNA	0	0	0.49	0	0	0	0	0.163333	0	0	0.36	0	0	0	0	0.12	0	0	1	0	0	0	0	0.333333	-1.0023	0.805965	0.999443
100506581	'C16orf95'	mRNA	5.68	4.37	4.91	4.68	4.79	4.69	4.72	4.98667	4.12	3.25	3.61	3.32	3.5	3.43	3.41667	3.66	45	37	37	38	38	38	38	39.6667	-0.102213	0.735556	0.999443
100506658	'OCLN'	mRNA	0.3	0.54	0.45	0.6	0.71	0.47	0.593333	0.43	0.22	0.4	0.33	0.42	0.52	0.34	0.426667	0.316667	13	21	17	24	29	19	24	17	0.457704	0.282524	0.999443
100506736	'SLFN12L'	mRNA	0	0	0	0.02	0	0.02	0.0133333	0	0	0	0	0.02	0	0.02	0.0133333	0	0	0	0	1	0	1	0.666667	0	1.80924	0.576566	0.999443
100507003	'GFY'	mRNA	0.11	0.07	0.21	0	0.05	0	0.0166667	0.13	0.08	0.05	0.16	0	0.04	0	0.0133333	0.0966667	2	1	3	0	1	0	0.333333	2	-2.52625	0.183144	0.999443
100507290	'ZNF865'	mRNA	12.75	14.05	13.42	14.58	15	15.32	14.9667	13.4067	9.25	10.45	9.86	10.32	10.96	11.2	10.8267	9.85333	661	775	691	771	802	824	799	709	0.133046	0.156528	0.999443
100507421	'TMEM178B'	mRNA	0	0	0	0	0.04	0	0.0133333	0	0	0	0	0	0.03	0	0.01	0	0	0	0	0	1	0	0.333333	0	0.92125	0.82138	0.999443
100507436	'MICA'	mRNA	58.04	52.67	53.36	50.36	51.53	49.18	50.3567	54.69	42.08	39.16	39.18	35.67	37.63	35.95	36.4167	40.14	699	672.09	635	615	637	615	622.333	668.697	-0.143494	0.120521	0.999443
100507588	'TGFBR3L'	mRNA	24.79	27.8	21.57	21.94	27	26.1	25.0133	24.72	17.97	20.67	15.84	15.54	19.72	19.08	18.1133	18.16	299	365	272	277	343	335	318.333	312	-0.00799481	0.954104	0.999443
100507607	'NPIPB9'	mRNA	1.39	1.94	1.14	1	1.06	1.53	1.19667	1.49	1.01	1.44	0.83	0.71	0.77	1.12	0.866667	1.09333	25.62	33.23	22.13	19.7	19.74	28.11	22.5167	26.9933	-0.31477	0.421847	0.999443
100507679	'MUC22'	mRNA	0	0.01	0	0	0	0	0	0.00333333	0	0.01	0	0	0	0	0	0.00333333	0	1	0	0	0	0	0	0.333333	-1.0023	0.805965	0.999443
100507747	'C13orf46'	mRNA	0.26	0.1	0.09	0.55	0.33	0.15	0.343333	0.15	0.19	0.07	0.07	0.39	0.24	0.11	0.246667	0.11	10	4	2	18	10	6	11.3333	5.33333	1.04112	0.152236	0.999443
100509620	'LOC100509620'	mRNA	0	0	0	0.07	0	0	0.0233333	0	0	0	0	0.05	0	0	0.0166667	0	0	0	0	1	0	0	0.333333	0	0.92125	0.82138	0.999443
10051	'SMC4'	mRNA	31.23	29.65	33.34	35.37	29.24	30.63	31.7467	31.4067	22.65	22.04	24.48	25.05	21.35	22.39	22.93	23.0567	1683	1697	1781	1943	1624	1706	1757.67	1720.33	-0.0115479	0.882566	0.999443
100510707	'TBC1D3J'	mRNA	0	0.06	0	0	0	0	0	0.02	0	0.04	0	0	0	0	0	0.0133333	0	1.06	0	0	0	0	0	0.353333	-1.0023	0.805965	0.999443
10052	'GJC1'	mRNA	3.62	3.05	4.01	3.44	3.18	3.25	3.29	3.56	2.62	2.27	2.94	2.44	2.32	2.38	2.38	2.61	295	262	319	288	265	277	276.667	292	-0.119734	0.353403	0.999443
100526693	'ARPC4-TTLL3'	mRNA	4.01	5.89	3.97	3.71	3.96	5.5	4.39	4.62333	2.91	4.38	2.91	2.63	2.89	4.02	3.18	3.4	165.05	257.7	162.04	155.95	167.93	234.96	186.28	194.93	-0.106428	0.585201	0.999443
100526694	'MSANTD3-TMEFF1'	mRNA	0.88	1.1	0.8	1.01	0.73	0.95	0.896667	0.926667	0.64	0.82	0.59	0.71	0.53	0.69	0.643333	0.683333	21.08	28.15	19.12	24.64	18.04	23.57	22.0833	22.7833	-0.105379	0.793481	0.999443
100526737	'RBM14-RBM4'	mRNA	6.17	3.49	4.78	4.74	6.69	4.22	5.21667	4.81333	4.47	2.6	3.51	3.36	4.88	3.08	3.77333	3.52667	54.08	26.97	37.17	41.94	54.2	31.94	42.6933	39.4067	0.0662243	0.84356	0.999443
100526739	'CENPS-CORT'	mRNA	9.17	9.72	8.99	8.26	8.43	7.59	8.09333	9.29333	6.65	7.23	6.6	5.85	6.16	5.55	5.85333	6.82667	125.85	141.4	120.93	115.8	119.45	106.62	113.957	129.393	-0.223042	0.212446	0.999443
100526740	'ATP5MF-PTCD1'	mRNA	0.24	0	0.15	0	0	0	0	0.13	0.18	0	0.11	0	0	0	0	0.0966667	14.14	0	8.82	0	0	0	0	7.65333	-5.36267	0.14846	0.999443
100526760	'ABHD14A-ACY1'	mRNA	0	0	0	0.29	0	0	0.0966667	0	0	0	0	0.21	0	0	0.07	0	0	0	0	5.19	0	0	1.73	0	3.10568	0.218955	0.999443
100526761	'CCDC169-SOHLH2'	mRNA	0	0	0	0	0	0.1	0.0333333	0	0	0	0	0	0	0.08	0.0266667	0	0	0	0	0	0	2.81	0.936667	0	1.83302	0.598899	0.999443
100526772	'STIMATE-MUSTN1'	mRNA	3.52	0.48	0	1.45	1.6	1.3	1.45	1.33333	2.55	0.36	0	1.03	1.17	0.95	1.05	0.97	44.96	6.49	0	18.88	21.13	17.19	19.0667	17.15	0.129875	0.933109	0.999443
100526783	'ARPIN-AP3S2'	mRNA	8.09	7	6.91	7.24	7.11	7.95	7.43333	7.33333	5.87	5.2	5.07	5.13	5.19	5.81	5.37667	5.38	532.38	490.14	451.97	486.31	482.85	542.7	503.953	491.497	-0.00358802	0.973319	0.999443
100526794	'NT5C1B-RDH14'	mRNA	0.07	0.06	0	0	0	0	0	0.0433333	0.05	0.04	0	0	0	0	0	0.03	1.64	1.48	0	0	0	0	0	1.04	-1.88953	0.555899	0.999443
100526832	'PHOSPHO2-KLHL23'	mRNA	0	0.8	0	0	0.81	0	0.27	0.266667	0	0.6	0	0	0.59	0	0.196667	0.2	0	36.97	0	0	35.99	0	11.9967	12.3233	-0.043518	0.990718	0.999443
100526835	'FPGT-TNNI3K'	mRNA	0.05	0	0	0	0.13	0	0.0433333	0.0166667	0.03	0	0	0	0.09	0	0.03	0.01	1.29	0	0	0	3.73	0	1.24333	0.43	1.45599	0.568097	0.999443
100526842	'RPL17-C18orf32'	mRNA	13.17	10.13	11.51	12.56	11.23	10.55	11.4467	11.6033	9.55	7.53	8.45	8.89	8.2	7.72	8.27	8.51	243.47	199.56	210.64	236.29	214.64	202.63	217.853	217.89	-0.0416447	0.770724	0.999443
100527943	'TGIF2-RAB5IF'	mRNA	0.42	0.21	0.33	0.33	0.67	0	0.333333	0.32	0.3	0.16	0.25	0.24	0.49	0	0.243333	0.236667	3.97	2.14	3.15	3.25	6.58	0	3.27667	3.08667	0.128382	0.912746	0.999443
100527963	'PMF1-BGLAP'	mRNA	4.84	9.22	7.39	7.48	7.19	6.59	7.08667	7.15	3.51	6.85	5.42	5.3	5.25	4.82	5.12333	5.26	38.38	77.31	57.59	60.87	57.35	51.94	56.72	57.76	-0.0742945	0.789991	0.999443
100527978	'TLCD4-RWDD3'	mRNA	0.39	0.12	0.49	0.37	0.33	0.41	0.37	0.333333	0.28	0.09	0.36	0.26	0.24	0.3	0.266667	0.243333	5.25	1.78	6.6	5.05	4.65	5.78	5.16	4.54333	0.176414	0.847517	0.999443
100528021	'ST20-MTHFS'	mRNA	0.36	0	0	0.38	0.36	0.16	0.3	0.12	0.26	0	0	0.27	0.26	0.12	0.216667	0.0866667	8.12	0	0	8.7	8.27	3.7	6.89	2.70667	1.20639	0.264318	0.999443
100528030	'POC1B-GALNT4'	mRNA	0.45	0.31	0.54	0.55	0.85	0.52	0.64	0.433333	0.32	0.23	0.4	0.39	0.62	0.38	0.463333	0.316667	24.7	18.32	28.26	29.74	47.13	29.67	35.5133	23.76	0.545303	0.14314	0.999443
100528062	'ARMCX5-GPRASP2'	mRNA	0.45	0.29	0.63	0.54	0.87	0.28	0.563333	0.456667	0.32	0.22	0.47	0.38	0.63	0.2	0.403333	0.336667	21.26	19.2	34.34	26.79	43.89	16.37	29.0167	24.9333	0.157837	0.705788	0.999443
100528064	'NEDD8-MDP1'	mRNA	1.21	2.63	2.07	2.14	1.7	1.42	1.75333	1.97	0.88	1.96	1.52	1.52	1.24	1.04	1.26667	1.45333	7	16.14	11.65	12.59	10.13	8.56	10.4267	11.5967	-0.22213	0.704197	0.999443
100529063	'BCL2L2-PABPN1'	mRNA	14.43	16.56	13.94	10.87	14.38	18.72	14.6567	14.9767	10.47	12.31	10.24	7.7	10.5	13.68	10.6267	11.0067	286.32	349.33	273.77	219.89	294.23	385.52	299.88	303.14	-0.0506849	0.766731	0.999443
100529097	'RPL36A-HNRNPH2'	mRNA	8.32	5.71	6.47	8.03	9.51	6.02	7.85333	6.83333	6.03	4.24	4.75	5.69	6.95	4.4	5.68	5.00667	206.39	150.42	158.47	203.29	244.16	155.98	201.143	171.76	0.187606	0.29814	0.999443
100529144	'CORO7-PAM16'	mRNA	0.38	0	0	0	0.22	0.39	0.203333	0.126667	0.28	0	0	0	0.16	0.29	0.15	0.0933333	12.8	0	0	0	7.75	13.72	7.15667	4.26667	0.720059	0.815101	0.999443
100529215	'ZNF559-ZNF177'	mRNA	0	0	0	0	0.11	0	0.0366667	0	0	0	0	0	0.08	0	0.0266667	0	0	0	0	0	3.06	0	1.02	0	2.41918	0.416598	0.999443
100529239	'RPS10-NUDT3'	mRNA	15.95	12.38	14.4	13.81	12.25	12.75	12.9367	14.2433	11.56	9.21	10.57	9.78	8.94	9.32	9.34667	10.4467	399.23	329.76	357.12	352.75	316.13	331.25	333.377	362.037	-0.160584	0.179199	0.999443
100529240	'ZNF816-ZNF321P'	mRNA	0.84	0.84	0.91	1.03	0.84	1.01	0.96	0.863333	0.61	0.63	0.67	0.73	0.61	0.74	0.693333	0.636667	22.37	23.97	24	28	23	28	26.3333	23.4467	0.153769	0.683068	0.999443
100529241	'HSPE1-MOB4'	mRNA	0	0	0.21	0	0	0.19	0.0633333	0.07	0	0	0.16	0	0	0.14	0.0466667	0.0533333	0	0	8.48	0	0	8.07	2.69	2.82667	-0.0432693	0.990899	0.999443
100529251	'CKLF-CMTM1'	mRNA	0.63	0	0	0.39	0	0	0.13	0.21	0.45	0	0	0.28	0	0	0.0933333	0.15	3.1	0	0	2.26	0	0	0.753333	1.03333	-0.647601	0.782894	0.999443
100529257	'SYNJ2BP-COX16'	mRNA	0.32	0	0.12	0	0.09	0	0.03	0.146667	0.23	0	0.09	0	0.06	0	0.02	0.106667	5.8	0	2.15	0	1.58	0	0.526667	2.65	-2.74617	0.154666	0.999443
100529261	'CHURC1-FNTB'	mRNA	2.07	0.64	0.82	1.92	1.4	2.63	1.98333	1.17667	1.5	0.48	0.6	1.36	1.02	1.92	1.43333	0.86	59.09	19.12	22.81	55.84	40.94	75.63	57.47	33.6733	0.726371	0.0526268	0.999443
10053	'AP1M2'	mRNA	11.47	11.18	13.51	10.23	10.59	10.28	10.3667	12.0533	8.31	8.31	9.92	7.24	7.73	7.51	7.49333	8.84667	188	195	219	171	179	175	175	200.667	-0.238248	0.111005	0.999443
100532726	'NDUFC2-KCTD14'	mRNA	5.97	7.72	5.44	7.19	3.39	7.12	5.9	6.37667	4.33	5.74	4	5.09	2.47	5.2	4.25333	4.69	113.56	155.97	102.34	139.32	66.42	140.51	115.417	123.957	-0.142589	0.5525	0.999443
100532731	'COMMD3-BMI1'	mRNA	3.86	1.07	1.87	1.38	1.62	2.15	1.71667	2.26667	2.8	0.8	1.37	0.98	1.18	1.57	1.24333	1.65667	133.18	39.46	63.92	48.61	57.65	77.12	61.1267	78.8533	-0.405723	0.462135	0.999443
100532736	'MICOS10-NBL1'	mRNA	1.12	0.63	0.92	1.3	0.72	0.62	0.88	0.89	0.81	0.47	0.67	0.92	0.52	0.45	0.63	0.65	23.37	13.92	18.52	27.97	15.38	13.7	19.0167	18.6033	-0.0207967	0.964294	0.999443
100533105	'C8orf44-SGK3'	mRNA	1.31	1.06	0.36	0.86	0.75	1.31	0.973333	0.91	0.95	0.79	0.26	0.61	0.55	0.96	0.706667	0.666667	61.84	53.02	16.78	41.28	36.28	64	47.1867	43.88	0.0837556	0.823243	0.999443
100533106	'ZHX1-C8orf76'	mRNA	2.18	0.91	1.81	2.07	1.95	1.01	1.67667	1.63333	1.58	0.67	1.33	1.46	1.42	0.73	1.20333	1.19333	25.52	11.28	20.93	24.66	23.49	12.23	20.1267	19.2433	0.030447	0.947444	0.999443
100533183	'ZNF664-RFLNA'	mRNA	0.07	0.11	0.28	0.05	0.09	0.13	0.09	0.153333	0.05	0.08	0.21	0.03	0.07	0.09	0.0633333	0.113333	1.57	2.65	6.62	1.13	2.24	3.1	2.15667	3.61333	-0.626751	0.606607	0.999443
100533467	'BIVM-ERCC5'	mRNA	2.82	1.17	3.37	2.42	1.95	2.88	2.41667	2.45333	2.04	0.87	2.48	1.72	1.42	2.11	1.75	1.79667	151.79	67.09	180.42	133.24	108.35	161.16	134.25	133.1	-0.0308777	0.94484	0.999443
100533496	'TVP23C-CDRT4'	mRNA	2.37	2.51	3.36	4.68	2.97	1.56	3.07	2.74667	1.72	1.87	2.47	3.32	2.17	1.14	2.21	2.02	65.37	73.77	91.93	131.86	84.5	44.6	86.9867	77.0233	0.127568	0.658702	0.999443
100533952	'RBAK-RBAKDN'	mRNA	0	0.16	0	0	0.17	0.16	0.11	0.0533333	0	0.12	0	0	0.12	0.12	0.08	0.04	0	1.03	0	0	1.05	1.03	0.693333	0.343333	0.869145	0.743771	0.999443
100534012	'TNFAIP8L2-SCNM1'	mRNA	0	0.43	0	0	0	0	0	0.143333	0	0.32	0	0	0	0	0	0.106667	0	8.47	0	0	0	0	0	2.82333	-3.88133	0.324608	0.999443
100534592	'URGCP-MRPS24'	mRNA	0.78	0.86	1.89	1.87	1.07	1.91	1.61667	1.17667	0.57	0.64	1.39	1.32	0.78	1.4	1.16667	0.866667	4.66	5.4	10.96	11.28	6.55	11.84	9.89	7.00667	0.513101	0.458228	0.999443
100534599	'ISY1-RAB43'	mRNA	12.9	12.1	13.53	14.1	13.62	13.6	13.7733	12.8433	9.36	9	9.93	9.98	9.95	9.94	9.95667	9.43	685.18	683.69	713.69	763.91	746.08	749.41	753.133	694.187	0.0769129	0.381735	0.999443
10054	'UBA2'	mRNA	65.61	53.87	65.51	66.05	63.71	62.66	64.14	61.6633	47.57	40.05	48.1	46.77	46.52	45.8	46.3633	45.24	1709	1482	1696	1734	1711	1699	1714.67	1629	0.0327181	0.683776	0.999443
10055	'SAE1'	mRNA	88.12	84.11	83.83	89.31	84.11	82.41	85.2767	85.3533	63.9	62.54	61.55	63.25	61.42	60.24	61.6367	62.6633	2192	2224	2062	2265	2150	2121	2178.67	2159.33	-0.027738	0.678002	0.999443
10056	'FARSB'	mRNA	71.23	67.62	81.79	73.74	69.33	63.44	68.8367	73.5467	51.64	50.27	60.05	52.22	50.63	46.38	49.7433	53.9867	1495	1495	1687	1568	1516.47	1398	1494.16	1559	-0.10344	0.209279	0.999443
10057	'ABCC5'	mRNA	7.2	6.78	6.78	7.45	7.49	7.37	7.43667	6.92	5.22	5.04	4.98	5.28	5.47	5.39	5.38	5.08	411	393	382	439	431	425	431.667	395.333	0.0863691	0.413936	0.999443
10058	'ABCB6'	mRNA	17.03	18.86	17.09	15.81	15.83	17.07	16.2367	17.66	12.35	14.02	12.55	11.19	11.56	12.48	11.7433	12.9733	503	592	496	479	485	527	497	530.333	-0.13272	0.214703	0.999443
10059	'DNM1L'	mRNA	26.96	23.17	26.56	28.38	24.5	23.75	25.5433	25.5633	19.55	17.22	19.5	20.1	17.89	17.36	18.45	18.7567	1267.08	1164	1244	1360.19	1190	1161	1237.06	1225.03	-0.0282556	0.732406	0.999443
1006	'CDH8'	mRNA	0.02	0.07	0.04	0.06	0.05	0.04	0.05	0.0433333	0.01	0.05	0.03	0.04	0.04	0.03	0.0366667	0.03	2	7	4	6	5	4	5	4.33333	0.165511	0.849849	0.999443
10060	'ABCC9'	mRNA	1.68	2.04	1.81	2.03	1.89	2.08	2	1.84333	1.22	1.52	1.33	1.44	1.38	1.52	1.44667	1.35667	153.84	196.14	164.06	188.16	176.41	195.58	186.717	171.347	0.0839753	0.588878	0.999443
10061	'ABCF2'	mRNA	16.36	16.71	16.31	15.81	15.57	15.89	15.7567	16.46	11.86	12.42	11.98	11.2	11.37	11.62	11.3967	12.0867	770.76	837.67	763.22	760.13	756.4	776.9	764.477	790.55	-0.0881948	0.311623	0.999443
10062	'NR1H3'	mRNA	40.18	39.59	41.92	42.9	44.28	43.69	43.6233	40.5633	29.13	29.43	30.78	30.38	32.33	31.94	31.55	29.78	593	636	604	659	676	686	673.667	611	0.100973	0.274582	0.999443
10063	'COX17'	mRNA	169.88	155.91	172.46	181.12	141.37	158.72	160.403	166.083	123.17	115.91	126.62	128.27	103.23	116.03	115.843	121.9	304	294	291	327	260	298	295	296.333	-0.0483767	0.69915	0.999443
100652748	'TIMM23B'	mRNA	10.01	8.87	10.08	8.91	8.86	7.97	8.58	9.65333	7.26	6.59	7.4	6.31	6.47	5.83	6.20333	7.08333	243.76	231.33	244.58	222.45	222.53	202.74	215.907	239.89	-0.193516	0.152491	0.999443
100652777	'LOC100652777'	mRNA	0.12	0	0	0	0.23	0	0.0766667	0.04	0.09	0	0	0	0.17	0	0.0566667	0.03	1	0	0	0	2	0	0.666667	0.333333	0.870338	0.75798	0.999443
100653049	'LOC100653049'	mRNA	0.31	0	0	0	0	0	0	0.103333	0.22	0	0	0	0	0	0	0.0733333	4.99	0	0	0	0	0	0	1.66333	-2.89441	0.279418	0.999443
100653133	'LOC100653133'	mRNA	0	0.07	0	0	0	0	0	0.0233333	0	0.05	0	0	0	0	0	0.0166667	0	1	0	0	0	0	0	0.333333	-1.0023	0.805965	0.999443
100653515	'CEP295NL'	mRNA	0.2	0.19	0.3	0.19	0.24	0.24	0.223333	0.23	0.14	0.14	0.22	0.14	0.18	0.17	0.163333	0.166667	4	4	6	4	5	5	4.66667	4.66667	-0.0406694	0.961958	0.999443
10066	'SCAMP2'	mRNA	19.21	22.22	23.35	21.83	21.69	20.27	21.2633	21.5933	13.93	16.52	17.15	15.46	15.84	14.82	15.3733	15.8667	465	572	560	539	541	509	529.667	532.333	-0.0480289	0.653819	0.999443
10067	'SCAMP3'	mRNA	113.27	111.6	112.66	110.28	113.5	100.42	108.067	112.51	82.13	82.97	82.72	78.11	82.88	73.41	78.1333	82.6067	1573	1652	1542	1561	1624	1450	1545	1589	-0.0806866	0.286577	0.999443
10068	'IL18BP'	mRNA	3.31	3.21	4.46	4.05	3.57	3.1	3.57333	3.66	2.4	2.38	3.28	2.87	2.61	2.26	2.58	2.68667	77	72	87	88	82	77	82.3333	78.6667	0.0235907	0.91305	0.999443
10069	'RWDD2B'	mRNA	19.17	16.37	19.12	20	21.34	19.37	20.2367	18.22	13.9	12.17	14.04	14.16	15.58	14.16	14.6333	13.37	414	356	382	420	462	440	440.667	384	0.158673	0.160183	0.999443
10071	'MUC12'	mRNA	0.01	0.02	0.01	0	0	0.01	0.00333333	0.0133333	0	0.01	0	0	0	0.01	0.00333333	0.00333333	1	3	1	0	0	2	0.666667	1.66667	-1.34809	0.469003	0.999443
10072	'DPP3'	mRNA	26.38	26.15	26.27	28.9	28.03	25.86	27.5967	26.2667	19.13	19.44	19.28	20.47	20.47	18.91	19.95	19.2833	698	735	689	779	764	710	751	707.333	0.0457571	0.603703	0.999443
10073	'SNUPN'	mRNA	19.44	17.41	17.15	21.48	19.4	20.48	20.4533	18	14.1	12.94	12.59	15.21	14.17	14.97	14.7833	13.21	250	238	219	281	257	274	270.667	235.667	0.159245	0.219646	0.999443
10075	'HUWE1'	mRNA	46.11	42.95	47.1	50.66	45.94	44.59	47.0633	45.3867	33.43	31.94	34.58	35.88	33.55	32.6	34.01	33.3167	7154	7096	7249	8024	7351	7169	7514.67	7166.33	0.0267229	0.658399	0.999443
10076	'PTPRU'	mRNA	56.35	60.87	57.93	65.29	63.07	62.07	63.4767	58.3833	40.86	45.25	42.53	46.24	46.06	45.37	45.89	42.88	3305	3799	3375	3908	3815	3776	3833	3493	0.0939129	0.171293	0.999443
10077	'TSPAN32'	mRNA	0	0	0	0	0	0.11	0.0366667	0	0	0	0	0	0	0.08	0.0266667	0	0	0	0	0	0	2	0.666667	0	1.83302	0.598899	0.999443
10078	'TSSC4'	mRNA	26.91	28.66	25.45	23.71	28.1	27.52	26.4433	27.0067	19.51	21.31	18.69	16.79	20.52	20.12	19.1433	19.8367	367	427	351	333	398	388	373	381.667	-0.0710221	0.564751	0.999443
10079	'ATP9A'	mRNA	11.07	8.77	10.47	10.56	9.94	9.53	10.01	10.1033	8.03	6.52	7.69	7.48	7.26	6.96	7.23333	7.41333	924	779	873	904	851	827	860.667	858.667	-0.0382836	0.676199	0.999443
10081	'PDCD7'	mRNA	17.64	15.72	14.98	17.4	18.14	18.67	18.07	16.1133	12.79	11.69	11	12.32	13.24	13.65	13.07	11.8267	499	473	420	502	529	548	526.333	464	0.142815	0.179038	0.999443
100820829	'MYZAP'	mRNA	2.19	2.07	1.5	2.54	2.3	3.4	2.74667	1.92	1.59	1.54	1.1	1.8	1.68	2.48	1.98667	1.41	51	52	35	61	56	83	66.6667	46	0.497699	0.0691091	0.999443
10083	'USH1C'	mRNA	10.58	12.8	10.92	13.53	12.12	12.26	12.6367	11.4333	7.67	9.51	8.02	9.58	8.85	8.97	9.13333	8.4	236	300	241	307	278	283	289.333	259	0.119387	0.367239	0.999443
10084	'PQBP1'	mRNA	93.47	107.06	85.59	92.35	91.22	102.19	95.2533	95.3733	67.77	79.6	62.84	65.4	66.61	74.7	68.9033	70.07	769	899	687	756	766	830	784	785	-0.0402187	0.694689	0.999443
10085	'EDIL3'	mRNA	1.15	1.2	1.03	1.25	1.06	0.86	1.05667	1.12667	0.83	0.89	0.76	0.88	0.77	0.63	0.76	0.826667	57	63	51	63	54	44	53.6667	57	-0.128642	0.622071	0.999443
100861412	'FSBP'	mRNA	0.27	0.26	0	0.24	0.15	0.29	0.226667	0.176667	0.19	0.19	0	0.17	0.11	0.21	0.163333	0.126667	15.19	15.73	0	14.14	8.77	16.92	13.2767	10.3067	0.306882	0.657417	0.999443
100862671	'TMEM265'	mRNA	1.96	1.29	1.98	1.79	0.82	1.64	1.41667	1.74333	1.42	0.96	1.46	1.27	0.6	1.2	1.02333	1.28	30	21	30	28	13	26	22.3333	27	-0.318764	0.427683	0.999443
10087	'CERT1'	mRNA	7.27	5.53	6.48	7.05	6.11	5.32	6.16	6.42667	5.27	4.11	4.76	4.99	4.46	3.89	4.44667	4.71333	295	234	272	298	259	227	261.333	267	-0.0739005	0.599228	0.999443
100873985	'MED14OS'	mRNA	0	0.27	0.14	0	0.14	0	0.0466667	0.136667	0	0.2	0.11	0	0.1	0	0.0333333	0.103333	0	2	1	0	1	0	0.333333	1	-1.51834	0.524856	0.999443
100874261	'CCDC200'	mRNA	0	0.37	0.6	0	0.38	0	0.126667	0.323333	0	0.27	0.44	0	0.28	0	0.0933333	0.236667	0	2	3	0	2	0	0.666667	1.66667	-1.35633	0.483551	0.999443
100885848	'PTGES3L'	mRNA	1.01	0.23	0.59	0.35	0.58	0.15	0.36	0.61	0.73	0.17	0.44	0.24	0.42	0.11	0.256667	0.446667	13	3.42	8.27	4.97	8.45	2.23	5.21667	8.23	-0.818189	0.312202	0.999443
100885850	'PTGES3L-AARSD1'	mRNA	0.87	0.86	0.34	0.71	1.3	0.72	0.91	0.69	0.63	0.64	0.25	0.51	0.95	0.53	0.663333	0.506667	18.36	17.79	7.03	15.38	23.52	14.96	17.9533	14.3933	0.272885	0.587697	0.999443
10089	'KCNK7'	mRNA	0.78	0.92	0.49	1.04	0	0.51	0.516667	0.73	0.56	0.68	0.36	0.73	0	0.37	0.366667	0.533333	8	10	5	10	0	5	5	7.66667	-0.66659	0.427189	0.999443
1009	'CDH11'	mRNA	0.03	0.02	0	0	0.03	0.02	0.0166667	0.0166667	0.02	0.02	0	0	0.02	0.02	0.0133333	0.0133333	1	1	0	0	1	1	0.666667	0.666667	-0.0218737	0.992383	0.999443
10090	'UST'	mRNA	9.41	8.83	9.87	9.66	9.9	8.93	9.49667	9.37	6.82	6.56	7.25	6.84	7.23	6.52	6.86333	6.87667	430	423	433	453	429	410	430.667	428.667	-0.034541	0.741147	0.999443
10092	'ARPC5'	mRNA	32.54	28.94	33.11	35.25	33	31.83	33.36	31.53	23.6	21.52	24.31	24.97	24.09	23.27	24.11	23.1433	2519	2384	2546.77	2785	2634	2555.95	2658.32	2483.26	0.056705	0.406631	0.999443
10093	'ARPC4'	mRNA	79.32	74.21	78.52	84.01	85.02	69.39	79.4733	77.35	57.51	55.18	57.65	59.5	62.09	50.72	57.4367	56.78	1204.3	1187.85	1201.06	1310.76	1308.63	1086.64	1235.34	1197.74	0.00286774	0.973484	0.999443
10094	'ARPC3'	mRNA	427.38	395.01	413.44	458.9	429.47	421.45	436.607	411.943	309.88	293.68	303.55	325	313.61	308.09	315.567	302.37	3219	3160	3055	3520	3335	3303	3386	3144.67	0.0658538	0.287591	0.999443
10095	'ARPC1B'	mRNA	217.9	242.08	197.64	232.29	222.7	231.81	228.933	219.207	157.99	179.98	145.11	164.51	162.62	169.46	165.53	161.027	3040	3581	2710	3295	3192	3352	3279.67	3110.33	0.0377162	0.659516	0.999443
10096	'ACTR3'	mRNA	40.05	33.09	43.25	40.96	38.58	36.32	38.62	38.7967	29.04	24.6	31.75	29.01	28.17	26.55	27.91	28.4633	2748	2452	2932	2923	2744	2634	2767	2710.67	-0.0127484	0.873918	0.999443
10097	'ACTR2'	mRNA	67.14	49.06	67.88	67.93	56.38	56.24	60.1833	61.36	48.68	36.47	49.84	48.11	41.17	41.11	43.4633	44.9967	2622	2040	2635	2712	2272	2281	2421.67	2432.33	-0.0502681	0.611071	0.999443
10099	'TSPAN3'	mRNA	42.52	32.83	41.3	40.35	40.07	39.51	39.9767	38.8833	30.83	24.41	30.32	28.58	29.26	28.88	28.9067	28.52	745	642	703	696	714	718	709.333	696.667	-0.0144501	0.879071	0.999443
100996259	'FAM106B'	mRNA	0	0	0.13	0.07	0.21	0	0.0933333	0.0433333	0	0	0.09	0.05	0.15	0	0.0666667	0.03	0	0	1.74	1	2.98	0	1.32667	0.58	1.44081	0.547454	0.999443
100996379	'LOC100996379'	mRNA	0.78	0.21	0.57	0.22	0.33	0.21	0.253333	0.52	0.57	0.16	0.42	0.16	0.24	0.16	0.186667	0.383333	7	2	5	2	3	2	2.33333	4.66667	-1.04113	0.311426	0.999443
100996598	'LOC100996598'	mRNA	0	0	0	0.25	0	0	0.0833333	0	0	0	0	0.17	0	0	0.0566667	0	0	0	0	1	0	0	0.333333	0	0.92125	0.82138	0.999443
100996693	'SPEGNB'	mRNA	0.33	0.62	0.34	0	0.16	0.79	0.316667	0.43	0.24	0.46	0.25	0	0.12	0.58	0.233333	0.316667	2	4	2	0	1	5	2	2.66667	-0.440806	0.733999	0.999443
100996709	'LOC100996709'	mRNA	6.49	4.26	4.5	6.62	4.19	4.57	5.12667	5.08333	4.7	3.17	3.31	4.69	3.06	3.34	3.69667	3.72667	110.71	77.59	75.9	115.59	60.95	83.47	86.67	88.0667	-0.0669902	0.784445	0.999443
100996717	'NOTCH2NLC'	mRNA	9.53	6.35	6.57	8.1	7.96	7.92	7.99333	7.48333	6.91	4.72	4.83	5.74	5.81	5.79	5.78	5.48667	240.87	170.11	163.84	195.51	192.86	204.56	197.643	191.607	0.00494553	0.975942	0.999443
100996746	'SPDYE11'	mRNA	0	0	0	0.04	0	0	0.0133333	0	0	0	0	0.03	0	0	0.01	0	0	0	0	1	0	0	0.333333	0	0.92125	0.82138	0.999443
100996747	'LOC100996747'	mRNA	3.58	4.41	5.25	0	5.52	3.11	2.87667	4.41333	2.6	3.28	3.85	0	4.03	2.27	2.1	3.24333	9.66	12.58	13.55	0	15.34	8.78	8.04	11.93	-0.591714	0.414745	0.999443
100996758	'NPY4R2'	mRNA	11.17	10.12	8.29	12.02	9.35	11.02	10.7967	9.86	8.1	7.52	6.09	8.51	6.83	8.06	7.8	7.23667	413.33	402.78	387.36	466.42	355.34	450.23	423.997	401.157	0.0388106	0.741585	0.999443
100996763	'NOTCH2NLB'	mRNA	8.42	9.74	6.32	7.07	9.09	9.72	8.62667	8.16	6.11	7.24	4.64	5.01	6.64	7.11	6.25333	5.99667	203.84	234.52	144.57	190.13	213.35	241.51	214.997	194.31	0.11227	0.513121	0.999443
100996842	'LOC100996842'	mRNA	8.29	8.9	7.2	7.92	10.44	10.81	9.72333	8.13	6.01	6.62	5.29	5.61	7.62	7.9	7.04333	5.97333	71	85	67	69	89	97	85	74.3333	0.156491	0.4923	0.999443
100996928	'FMC1-LUC7L2'	mRNA	2.97	2.61	2.75	5.17	3.8	3.18	4.05	2.77667	2.15	1.94	2.02	3.66	2.78	2.32	2.92	2.03667	81.45	76.25	74.8	144.81	107.66	90.54	114.337	77.5	0.517888	0.0157701	0.999443
100996939	'PYURF'	mRNA	43	45.94	51.16	36.9	50.45	43.22	43.5233	46.7	31.18	34.15	37.56	26.13	36.84	31.59	31.52	34.2967	497.29	564.75	583.35	434.99	601.6	519.51	518.7	548.463	-0.119307	0.34211	0.999443
101	'ADAM8'	mRNA	0.92	1.01	0.53	0.87	0.86	0.7	0.81	0.82	0.66	0.75	0.39	0.62	0.63	0.51	0.586667	0.6	30	35	17	29	29	24	27.3333	27.3333	-0.038278	0.919028	0.999443
1010	'CDH12'	mRNA	0.93	0.76	1.19	1	0.92	1.07	0.996667	0.96	0.67	0.57	0.87	0.71	0.67	0.78	0.72	0.703333	33	34	47	43	41	46	43.3333	38	0.147541	0.626463	0.999443
10101	'NUBP2'	mRNA	112.11	120.3	97.92	111.95	119.54	122.24	117.91	110.11	81.29	89.44	71.9	79.29	87.29	89.36	85.3133	80.8767	1322	1514	1127	1352	1413	1485	1416.67	1321	0.0630154	0.515647	0.999443
10102	'TSFM'	mRNA	40.79	36.23	36.61	37.25	40.89	42.74	40.2933	37.8767	29.58	26.93	26.88	26.38	29.86	31.24	29.16	27.7967	639	603	537	608	660	697	655	593	0.104896	0.308718	0.999443
10103	'TSPAN1'	mRNA	20.33	20.03	19.15	16.48	18.18	18.57	17.7433	19.8367	14.74	14.89	14.06	11.67	13.27	13.58	12.84	14.5633	294	306	271	240	267	278	261.667	290.333	-0.188722	0.144961	0.999443
10105	'PPIF'	mRNA	82.81	76.66	83.08	76.95	71.05	72.69	73.5633	80.85	60.05	57	61	54.5	51.88	53.14	53.1733	59.35	1770	1744	1759	1678	1566	1614	1619.33	1757.67	-0.159287	0.0222929	0.999443
101059906	'LOC101059906'	mRNA	0	0.22	0.05	0.09	0.05	0.09	0.0766667	0.09	0	0.17	0.04	0.07	0.03	0.07	0.0566667	0.07	0	5	1	2	1	2	1.66667	2	-0.29885	0.836967	0.999443
101059918	'GOLGA8R'	mRNA	0.1	0.14	0.11	0.07	0.18	0.03	0.0933333	0.116667	0.07	0.1	0.08	0.05	0.13	0.02	0.0666667	0.0833333	5.18	8.02	5.67	3.98	9.93	1.72	5.21	6.29	-0.504054	0.56563	0.999443
101059938	'NPIPA7'	mRNA	26.73	29.7	30.6	24.11	24.91	28.66	25.8933	29.01	19.38	22.08	22.47	17.08	18.19	20.95	18.74	21.31	255.78	297.64	286.29	237.11	241.38	283.58	254.023	279.903	-0.178563	0.186508	0.999443
101059949	'LOC101059949'	mRNA	0.75	0.53	0.92	0.92	0.73	0.87	0.84	0.733333	0.55	0.39	0.68	0.65	0.54	0.64	0.61	0.54	6.06	4.52	7.32	7.56	6.1	7.29	6.98333	5.96667	0.191448	0.797642	0.999443
101059953	'NPIPA8'	mRNA	1.08	2.08	1.01	1.52	1.25	1.22	1.33	1.39	0.78	1.54	0.74	1.08	0.91	0.89	0.96	1.02	23.47	48.21	21.78	33.9	28.14	27.71	29.9167	31.1533	-0.102673	0.786042	0.999443
10106	'CTDSP2'	mRNA	56.26	50.4	57.99	59.37	60.91	58.47	59.5833	54.8833	40.79	37.47	42.58	42.04	44.48	42.74	43.0867	40.28	2819	2695	2884	3043	3149	3042	3078	2799.33	0.096369	0.160935	0.999443
101060017	'LOC101060017'	mRNA	0	0	0	0	0	0.08	0.0266667	0	0	0	0	0	0	0.06	0.02	0	0	0	0	0	0	1	0.333333	0	0.92125	0.82138	0.999443
101060179	'LOC101060179'	mRNA	4.33	3.86	3.55	3.72	3.72	5.3	4.24667	3.91333	3.14	2.87	2.61	2.63	2.72	3.88	3.07667	2.87333	96	91	78	84	85	122	97	88.3333	0.0971619	0.655987	0.999443
101060200	'ZNF891'	mRNA	1.49	1.8	1.56	2.35	2.06	1.38	1.93	1.61667	1.08	1.34	1.15	1.67	1.5	1.01	1.39333	1.19	30	38	31	48	45	31	41.3333	33	0.283067	0.375402	0.999443
101060226	'NBPF19'	mRNA	2.8	1.89	2.34	2.98	2.39	2.43	2.6	2.34333	2.03	1.4	1.72	2.11	1.75	1.78	1.88	1.71667	399.44	286.8	332.44	434.29	352.29	360.19	382.257	339.56	0.129372	0.333261	0.999443
101060301	'HNRNPCL4'	mRNA	0	0	0.06	0	0	0	0	0.02	0	0	0.05	0	0	0	0	0.0166667	0	0	1	0	0	0	0	0.333333	-1.0023	0.805965	0.999443
101060321	'TBC1D3G'	mRNA	0.84	1.02	0.77	0.62	0.82	0.8	0.746667	0.876667	0.61	0.76	0.56	0.44	0.6	0.58	0.54	0.643333	33.81	43.49	30.57	25.41	33.88	33.23	30.84	35.9567	-0.257025	0.445499	0.999443
101060341	'LOC101060341'	mRNA	20.8	19.24	21.42	17.65	18.8	17.34	17.93	20.4867	15.08	14.3	15.72	12.5	13.73	12.67	12.9667	15.0333	357.75	352.5	364.13	310.14	335.33	313.12	319.53	358.127	-0.203757	0.0793002	0.999443
101060351	'TBC1D3K'	mRNA	0.59	0.57	0.4	0.67	0	0.44	0.37	0.52	0.43	0.42	0.29	0.48	0	0.32	0.266667	0.38	24.43	26.49	17.12	27.51	0	19.46	15.6567	22.68	-0.594652	0.647643	0.999443
101060376	'TBC1D3L'	mRNA	15.65	18.06	13.15	14.15	16.37	18.73	16.4167	15.62	11.35	13.43	9.65	10.02	11.95	13.69	11.8867	11.4767	368.65	437.81	303.44	326.44	389.24	440.74	385.473	369.967	0.023957	0.867274	0.999443
101060389	'TBC1D3D'	mRNA	3.18	4.48	2.93	2.33	2.75	2.29	2.45667	3.53	2.31	3.33	2.15	1.65	2.01	1.68	1.78	2.59667	66.49	105.2	64.08	50.91	60.5	49.22	53.5433	78.59	-0.601149	0.0206946	0.999443
101060684	'NBPF26'	mRNA	2.5	2.55	2.12	2.57	2.34	2.71	2.54	2.39	1.81	1.9	1.56	1.82	1.71	1.98	1.83667	1.75667	149.25	162.22	125.9	156.48	143.95	167.75	156.06	145.79	0.0566279	0.734997	0.999443
10107	'TRIM10'	mRNA	0.12	0.18	0	0.05	0.06	0.07	0.06	0.1	0.09	0.13	0	0.03	0.04	0.05	0.04	0.0733333	4	7	0	2	2	3	2.33333	3.66667	-0.682042	0.557423	0.999443
10109	'ARPC2'	mRNA	335.03	323.74	310.46	348.06	341.39	333.87	341.107	323.077	242.92	240.7	227.94	246.5	249.29	244.06	246.617	237.187	4294	4406	3948	4535	4514	4443	4497.33	4216	0.0533834	0.399893	0.999443
10110	'SGK2'	mRNA	0.29	0.32	0.52	0.11	0.38	0.33	0.273333	0.376667	0.21	0.24	0.38	0.08	0.28	0.24	0.2	0.276667	6	7	10	2	8	6	5.33333	7.66667	-0.558911	0.461354	0.999443
10111	'RAD50'	mRNA	8.4	8.16	8.94	9.53	8.81	8.66	9	8.5	6.09	6.07	6.57	6.75	6.43	6.33	6.50333	6.24333	744	769	787	861	804	795	820	766.667	0.055686	0.516564	0.999443
10112	'KIF20A'	mRNA	77.02	70.41	77.4	75.46	60.68	61.71	65.95	74.9433	55.85	52.35	56.83	53.44	44.31	45.11	47.62	55.01	2410	2344	2402	2409	1958	2004	2123.67	2385.33	-0.210502	0.00715907	0.999443
10113	'PREB'	mRNA	47.67	47.5	45.4	47.48	43.44	45.05	45.3233	46.8567	34.56	35.32	33.34	33.63	31.72	32.93	32.76	34.4067	980	1037	922	994	919	960	957.667	979.667	-0.0731611	0.372776	0.999443
10114	'HIPK3'	mRNA	7.16	5.29	7.83	7.9	6.52	6.77	7.06333	6.76	5.19	3.93	5.75	5.59	4.76	4.95	5.1	4.95667	577	452	622	649	537	566	584	550.333	0.0418301	0.729929	0.999443
10116	'FEM1B'	mRNA	5.26	3.96	5.17	5.22	4.21	4.31	4.58	4.79667	3.81	2.94	3.8	3.7	3.08	3.15	3.31	3.51667	402	322	393	407	332	342	360.333	372.333	-0.090443	0.471792	0.999443
1012	'CDH13'	mRNA	6.47	7.55	6.57	6.05	5.89	5.98	5.97333	6.86333	4.69	5.62	4.82	4.29	4.3	4.37	4.32	5.04333	70	69	62	60	60	60	60	67	-0.199182	0.402759	0.999443
10120	'ACTR1B'	mRNA	62.35	65.01	56.99	61	62.47	62.39	61.9533	61.45	45.21	48.33	41.84	43.2	45.62	45.61	44.81	45.1267	1336	1484	1208	1327	1381	1390	1366	1342.67	-0.013889	0.870758	0.999443
10121	'ACTR1A'	mRNA	74.79	73.98	72.13	69.06	74.78	72.74	72.1933	73.6333	54.23	55	52.96	48.91	54.61	53.17	52.23	54.0633	2121	2232	2028	1998	2187	2141	2108.67	2127	-0.0513923	0.494219	0.999443
10123	'ARL4C'	mRNA	0.19	0.19	0.1	0.14	0.05	0.07	0.0866667	0.16	0.14	0.14	0.07	0.1	0.04	0.05	0.0633333	0.116667	8	8	4	6	2	3	3.66667	6.66667	-0.906771	0.286116	0.999443
10124	'ARL4A'	mRNA	18.77	15.24	19.32	18.74	15.88	16.72	17.1133	17.7767	13.61	11.33	14.18	13.27	11.6	12.22	12.3633	13.04	561.9	482.95	569	568.79	489.24	515.88	524.637	537.95	-0.0786933	0.46042	0.999443
10125	'RASGRP1'	mRNA	0	0	0.02	0	0	0	0	0.00666667	0	0	0.02	0	0	0	0	0.00666667	0	0	1	0	0	0	0	0.333333	-1.0023	0.805965	0.999443
10126	'DNAL4'	mRNA	10.17	9.43	10.84	9.83	12.55	11.02	11.1333	10.1467	7.38	7.01	7.96	6.96	9.16	8.05	8.05667	7.45	136	134	143	134	173	153	153.333	137.667	0.116479	0.497039	0.999443
10127	'ZNF263'	mRNA	14.89	14.66	12.97	15.61	14.93	15.74	15.4267	14.1733	10.8	10.9	9.52	11.06	10.91	11.51	11.16	10.4067	482	508	419	516	503	534	517.667	469.667	0.100972	0.336702	0.999443
10128	'LRPPRC'	mRNA	99.96	85.18	104.1	111.17	94.4	94.68	100.083	96.4133	72.48	63.33	76.43	78.73	68.93	69.22	72.2933	70.7467	5161	4739	5380	5722	5010	5035	5255.67	5093.33	0.00249098	0.972902	0.999443
10129	'FRY'	mRNA	0.65	0.42	0.53	0.47	0.51	0.43	0.47	0.533333	0.47	0.31	0.39	0.33	0.37	0.32	0.34	0.39	90	56	73	64	72	62	66	73	-0.186153	0.446962	0.999443
1013	'CDH15'	mRNA	0.14	0.16	0.14	0.17	0.1	0.07	0.113333	0.146667	0.1	0.12	0.1	0.12	0.07	0.05	0.08	0.106667	4	5	4	5	3	2	3.33333	4.33333	-0.423692	0.655418	0.999443
10130	'PDIA6'	mRNA	184.7	161.91	164.11	183.71	166.25	172.7	174.22	170.24	133.93	120.37	120.49	130.11	121.4	126.24	125.917	124.93	4114	3836	3620	4173	3820	3992	3995	3856.67	0.0101447	0.879804	0.999443
10131	'TRAP1'	mRNA	241.59	260.15	228.62	247	242.25	250.1	246.45	243.453	175.17	193.42	167.86	174.93	176.9	182.83	178.22	178.817	5229	5988	4901	5454	5408	5621	5494.33	5372.67	-0.00670078	0.927953	0.999443
10133	'OPTN'	mRNA	30.47	31.23	28.76	34.05	32.27	34.5	33.6067	30.1533	22.1	23.22	21.12	24.12	23.57	25.22	24.3033	22.1467	1066	1164	997	1213	1164	1252	1209.67	1075.67	0.129747	0.117151	0.999443
10134	'BCAP31'	mRNA	120.97	118.04	115.07	122.63	119.57	115.89	119.363	118.027	87.72	87.76	84.49	86.84	87.32	84.72	86.2933	86.6567	1409	1457	1310	1448	1424	1404	1425.33	1392	-0.00591715	0.936433	0.999443
10135	'NAMPT'	mRNA	19.33	16.4	21.89	18.01	17.78	17.07	17.62	19.2067	14.01	12.19	16.07	12.75	12.98	12.48	12.7367	14.09	875	790	984	832	830	802	821.333	883	-0.146275	0.135273	0.999443
10137	'RBM12'	mRNA	25.98	20.76	24.42	26.65	22.02	21.75	23.4733	23.72	18.84	15.43	17.93	18.87	16.08	15.9	16.95	17.4	1831.43	1555.98	1709.66	1915.94	1600.03	1589.62	1701.86	1699.02	-0.0404077	0.643777	0.999443
10138	'YAF2'	mRNA	11.59	8.59	10.68	12.62	10.26	10.1	10.9933	10.2867	8.4	6.39	7.84	8.94	7.49	7.38	7.93667	7.54333	406	343	381	425	393	403	407	376.667	0.0703263	0.533598	0.999443
10139	'ARFRP1'	mRNA	30.16	32.04	25.6	30.91	33.02	33.76	32.5633	29.2667	21.87	23.82	18.8	21.89	24.11	24.68	23.56	21.4967	513	583	447	536	582	610	576	514.333	0.125431	0.262926	0.999443
1014	'CDH16'	mRNA	0.04	0.07	0	0.19	0.08	0.11	0.126667	0.0366667	0.03	0.05	0	0.14	0.06	0.08	0.0933333	0.0266667	1	2	0	5	2	3	3.33333	1	1.6951	0.222791	0.999443
10140	'TOB1'	mRNA	90.17	73.81	97.78	88.23	79.88	78.83	82.3133	87.2533	65.38	54.88	71.79	62.49	58.33	57.63	59.4833	64.0167	1962	1710	2106	1953	1790	1777	1840	1926	-0.108546	0.21067	0.999443
101410538	'MMP24OS'	mRNA	36.21	38.21	39.17	35.5	33.78	32.6	33.96	37.8633	26.25	28.41	28.76	25.14	24.66	23.83	24.5433	27.8067	561	629	600	560	539	524	541	596.667	-0.182094	0.0591614	0.999443
10142	'AKAP9'	mRNA	1.72	1.9	2.22	2.26	2.21	2.05	2.17333	1.94667	1.25	1.41	1.63	1.6	1.61	1.5	1.57	1.43	236	268	286	306	304	287	299	263.333	0.14203	0.269413	0.999443
10144	'FAM13A'	mRNA	17.02	14.66	15.48	17.63	14.79	16.75	16.39	15.72	12.34	10.9	11.36	12.49	10.8	12.25	11.8467	11.5333	957	853	852	990	843	949	927.333	887.333	0.0222604	0.805003	0.999443
10146	'G3BP1'	mRNA	18.34	14.94	18.93	19.36	16.28	15.76	17.1333	17.4033	13.3	11.1	13.9	13.71	11.89	11.52	12.3733	12.7667	2019	1750	2072	2176	1848	1799	1941	1947	-0.0478958	0.588238	0.999443
10147	'SUGP2'	mRNA	28.94	30.26	26.96	33.61	28.68	32.81	31.7	28.72	20.99	22.5	19.8	23.8	20.94	23.98	22.9067	21.0967	1791	2004.08	1685	2002	1803	2047	1950.67	1826.69	0.0548755	0.497073	0.999443
10148	'EBI3'	mRNA	14.99	14.4	18.01	13.73	14.74	13.47	13.98	15.8	10.87	10.7	13.22	9.73	10.76	9.84	10.11	11.5967	152	154	182	147	154	146	149	162.667	-0.167751	0.303795	0.999443
10149	'ADGRG2'	mRNA	1.72	1.26	1.63	1.54	1.66	1.28	1.49333	1.53667	1.25	0.94	1.2	1.09	1.21	0.94	1.08	1.13	83	65	79	76	84	65	75	75.6667	-0.0540065	0.812894	0.999443
10150	'MBNL2'	mRNA	19.35	17.58	23.38	22.08	21.09	19.91	21.0267	20.1033	14.03	13.07	17.16	15.63	15.4	14.56	15.1967	14.7533	901	876	1094	1053	1014	970	1012.33	957	0.038647	0.694151	0.999443
10152	'ABI2'	mRNA	17.11	13.75	17.52	16.86	17.37	14.93	16.3867	16.1267	12.4	10.22	12.86	11.94	12.68	10.91	11.8433	11.8267	964	782	997	925	992	905.41	940.803	914.333	-0.00034	0.997362	0.999549
10153	'CEBPZ'	mRNA	23.9	22.65	25.36	26.9	23.26	23.28	24.48	23.97	17.33	16.84	18.62	19.05	16.98	17.02	17.6833	17.5967	814	821	857	935	817	823	858.333	830.667	0.00521413	0.952248	0.999443
10155	'TRIM28'	mRNA	138.16	149.93	136.69	150.62	140.74	146.06	145.807	141.593	100.18	111.47	100.36	106.67	102.77	106.77	105.403	104.003	4682	5423	4612	5171	4920	5129	5073.33	4905.67	0.00869417	0.902011	0.999443
10156	'RASA4'	mRNA	12.02	12.12	11.6	12.8	15.05	14.12	13.99	11.9133	8.72	9.01	8.51	9.07	10.99	10.32	10.1267	8.74667	680.08	740.85	663.61	705.6	830	842.99	792.863	694.847	0.152437	0.132829	0.999443
10157	'AASS'	mRNA	0	0	0	0.02	0.02	0.02	0.02	0	0	0	0	0.01	0.01	0.01	0.01	0	0	0	0	1	1.04	1	1.01333	0	2.40231	0.353855	0.999443
10158	'PDZK1IP1'	mRNA	0.16	0	0	0	0	0	0	0.0533333	0.11	0	0	0	0	0	0	0.0366667	1	0	0	0	0	0	0	0.333333	-1.0023	0.805965	0.999443
10159	'ATP6AP2'	mRNA	64.87	53.2	66.2	67.14	63.79	61.6	64.1767	61.4233	47.04	39.56	48.6	47.55	46.58	45.03	46.3867	45.0667	1418	1237	1433	1497	1438	1398	1444.33	1362.67	0.0422472	0.611087	0.999443
1016	'CDH18'	mRNA	0	0.03	0	0	0	0	0	0.01	0	0.02	0	0	0	0	0	0.00666667	0	1	0	0	0	0	0	0.333333	-1.0023	0.805965	0.999443
10160	'FARP1'	mRNA	21.47	22.39	19.3	22.88	19.84	21.61	21.4433	21.0533	15.57	16.65	14.17	16.2	14.49	15.8	15.4967	15.4633	1070	1189	978	1168	1031	1113	1104	1079	-0.00725735	0.933688	0.999443
10161	'LPAR6'	mRNA	0.09	0	0	0	0.09	0	0.03	0.03	0.07	0	0	0	0.06	0	0.02	0.0233333	1	0	0	0	1	0	0.333333	0.333333	-0.0405184	0.990082	0.999443
10162	'LPCAT3'	mRNA	59.22	52.55	64.09	62.69	55.69	52.01	56.7967	58.62	42.94	39.07	47.06	44.4	40.66	38.02	41.0267	43.0233	1294	1223	1393	1399	1255	1180	1278	1303.33	-0.0710383	0.409457	0.999443
10163	'WASF2'	mRNA	97.63	91.9	98.79	92.96	96.92	90.81	93.5633	96.1067	70.79	68.32	72.53	65.84	70.77	66.38	67.6633	70.5467	5846	5856	5877	5681	5985	5641	5769	5859.67	-0.0625865	0.31727	0.999443
10165	'SLC25A13'	mRNA	35.24	28.11	32.75	36.34	31.78	29.48	32.5333	32.0333	25.55	20.9	24.04	25.74	23.21	21.55	23.5	23.4967	1118	940	1027	1170	1034	963	1055.67	1028.33	-0.00464051	0.960261	0.999443
10166	'SLC25A15'	mRNA	4.81	4.28	4.74	5.83	4.66	4.27	4.92	4.61	3.49	3.18	3.48	4.13	3.4	3.12	3.55	3.38333	189	178.96	185	234	189	174	199	184.32	0.0700915	0.645161	0.999443
10168	'ZNF197'	mRNA	3	2.6	2.75	2.51	2.47	2.3	2.42667	2.78333	2.17	1.93	2.02	1.78	1.81	1.68	1.75667	2.04	186	166	165	160	157	167	161.333	172.333	-0.135376	0.381945	0.999443
10169	'SERF2'	mRNA	298.55	311.46	325.88	296.04	311.42	306.53	304.663	311.963	216.47	231.56	239.27	209.66	227.41	224.08	220.383	229.1	7618	8435	8237	7688	8186	8093	7989	8096.67	-0.0589214	0.387253	0.999443
1017	'CDK2'	mRNA	121.84	112.8	123.37	117.45	112.63	106.57	112.217	119.337	88.34	83.87	90.58	83.18	82.25	77.9	81.11	87.5967	2658	2617	2666	2609	2532	2412	2517.67	2647	-0.113364	0.0835898	0.999443
10171	'RCL1'	mRNA	19.49	17.84	19.22	21.25	19.71	19.82	20.26	18.85	14.13	13.26	14.11	15.05	14.4	14.49	14.6467	13.8333	387	378	377	431	401	408	413.333	380.667	0.0777846	0.466859	0.999443
10174	'SORBS3'	mRNA	76.04	86.4	78.23	81.02	84.47	79.86	81.7833	80.2233	55.14	64.24	57.43	57.38	61.68	58.38	59.1467	58.9367	1601	1935	1630	1747	1830	1741	1772.67	1722	0.00261503	0.974988	0.999443
10175	'CNIH1'	mRNA	17.08	11.77	18.17	16.18	14.66	13.03	14.6233	15.6733	12.38	8.75	13.34	11.46	10.7	9.52	10.56	11.49	844	619	892	816	747	668	743.667	785	-0.121948	0.322006	0.999443
10178	'TENM1'	mRNA	0	0.02	0.04	0.03	0.06	0.03	0.04	0.02	0	0.01	0.03	0.02	0.04	0.02	0.0266667	0.0133333	0	1	5	4	5	3	4	2	0.951187	0.414841	0.999443
10179	'RBM7'	mRNA	11.46	10.47	11.59	11.42	11.03	10.66	11.0367	11.1733	8.31	7.78	8.51	8.09	8.05	7.79	7.97667	8.2	441	429	443	449	438	426	437.667	437.667	-0.0409301	0.692494	0.999443
1018	'CDK3'	mRNA	9.56	8.6	7.37	9.58	7.8	8.94	8.77333	8.51	6.93	6.4	5.41	6.79	5.69	6.53	6.33667	6.24667	138	132	105	141	116	134	130.333	125	0.0198252	0.91247	0.999443
10180	'RBM6'	mRNA	34.77	36.81	32.7	37.62	33.05	36.92	35.8633	34.76	25.21	27.36	24.01	26.64	24.14	26.99	25.9233	25.5267	959	1061	909	1071	947	1069	1029	976.333	0.0355227	0.684691	0.999443
10181	'RBM5'	mRNA	34.14	34.1	32.48	37.91	36.05	36.45	36.8033	33.5733	24.76	25.35	23.85	26.85	26.33	26.64	26.6067	24.6533	1235	1272	1170	1370	1320	1354	1348	1225.67	0.0970436	0.194075	0.999443
10184	'LHFPL2'	mRNA	6.37	5.26	7.77	7.13	6.1	5.83	6.35333	6.46667	4.62	3.91	5.7	5.05	4.45	4.26	4.58667	4.74333	333	292	402	379	328	316	341	342.333	-0.0494398	0.713933	0.999443
10186	'LHFPL6'	mRNA	5.57	5.24	5.97	5.27	5.83	5.69	5.59667	5.59333	4.04	3.89	4.38	3.73	4.25	4.16	4.04667	4.10333	114	115	122	111	124	122	119	117	-0.0154389	0.931978	0.999443
10188	'TNK2'	mRNA	19	23.19	17.59	19.77	21.4	21.6	20.9233	19.9267	13.77	17.24	12.92	14	15.63	15.79	15.14	14.6433	845	1083	769	904	966	994	954.667	899	0.0491046	0.655043	0.999443
10189	'ALYREF'	mRNA	199.24	229.66	207	253.07	239.74	241.15	244.653	211.967	144.47	170.75	151.98	179.22	175.07	176.28	176.857	155.733	1833	2245	1873	2372	2274	2307	2317.67	1983.67	0.184666	0.0222451	0.999443
1019	'CDK4'	mRNA	151.15	144.33	137.95	145.06	151.63	142.56	146.417	144.477	109.6	107.3	101.28	102.73	110.72	104.21	105.887	106.06	2674	2715.34	2414	2617	2766	2619	2667.33	2601.11	-0.00295096	0.967055	0.999443
10190	'TXNDC9'	mRNA	50.87	44.41	54.19	56.92	48.45	46.11	50.4933	49.8233	36.89	33.02	39.78	40.31	35.38	33.71	36.4667	36.5633	694	647	732	795	683	655	711	691	-0.00172976	0.98598	0.999443
101927345	'LOC101927345'	mRNA	14.98	11.81	21.6	14.59	13.03	14.59	14.07	16.13	10.86	8.78	15.86	10.33	9.52	10.67	10.1733	11.8333	38.94	32.48	53.68	38.44	34.9	39.71	37.6833	41.7	-0.191237	0.544186	0.999443
101927375	'LOC101927375'	mRNA	0.49	1.05	0.82	0.42	1.23	0.53	0.726667	0.786667	0.36	0.78	0.6	0.3	0.9	0.39	0.53	0.58	5	11	7	4	12	5	7	7.66667	-0.164554	0.819983	0.999443
101927423	'PANO1'	mRNA	0.83	0.9	0.58	0.75	1.06	0.68	0.83	0.77	0.6	0.67	0.43	0.53	0.77	0.5	0.6	0.566667	13	15	9	12	17	11	13.3333	12.3333	0.0753116	0.886732	0.999443
101927509	'LOC101927509'	mRNA	0.29	0.42	0.29	0.45	0.37	0.43	0.416667	0.333333	0.21	0.31	0.21	0.32	0.27	0.31	0.3	0.243333	15	23	15	24	20	23	22.3333	17.6667	0.298296	0.482253	0.999443
101927572	'LOC101927572'	mRNA	4.78	4.69	6.28	6.22	5.29	5.66	5.72333	5.25	3.47	3.49	4.61	4.4	3.86	4.14	4.13333	3.85667	21	22	27	28	24	26	26	23.3333	0.113732	0.76357	0.999443
101928095	'LOC101928095'	mRNA	0.09	0	0	0.08	0.03	0	0.0366667	0.03	0.07	0	0	0.06	0.02	0	0.0266667	0.0233333	2	0	0	2	1	0	1	0.666667	0.533728	0.808896	0.999443
101928120	'LOC101928120'	mRNA	2.34	2.87	2.68	2.89	3.06	2.74	2.89667	2.63	1.69	2.13	1.97	2.05	2.23	2	2.09333	1.93	23	30	26	29	31	28	29.3333	26.3333	0.115762	0.745149	0.999443
101928212	'LOC101928212'	mRNA	0	0.04	0.02	0.02	0.03	0.03	0.0266667	0.02	0	0.03	0.02	0.01	0.02	0.02	0.0166667	0.0166667	0	2	1	1	1	1	1	1	-0.0379192	0.983666	0.999443
101928436	'LOC101928436'	mRNA	0.07	0	0	0	0	0	0	0.0233333	0.05	0	0	0	0	0	0	0.0166667	1	0	0	0	0	0	0	0.333333	-1.0023	0.805965	0.999443
101928527	'PIGBOS1'	mRNA	31.14	28.5	31.58	32.28	30.31	31.22	31.27	30.4067	22.58	21.19	23.18	22.86	22.13	22.82	22.6033	22.3167	224	216	218	236	225	231	230.667	219.333	0.0319202	0.811934	0.999443
101928548	'LOC101928548'	mRNA	0.58	2.06	1.34	1.15	0.85	1.54	1.18	1.32667	0.42	1.53	0.99	0.81	0.62	1.13	0.853333	0.98	4	15	9	8	6	11	8.33333	9.33333	-0.201634	0.761312	0.999443
101928589	'LOC101928589'	mRNA	0	0.31	1.98	0	0.14	2.13	0.756667	0.763333	0	0.23	1.46	0	0.1	1.56	0.553333	0.563333	0	6.06	35.83	0	2.59	40.44	14.3433	13.9633	-0.00286325	0.999132	0.999579
101928764	'LOC101928764'	mRNA	0	0.03	0.02	0.02	0.03	0	0.0166667	0.0166667	0	0.02	0.02	0.01	0.02	0	0.01	0.0133333	0	1	1	1	1	0	0.666667	0.666667	-0.0476527	0.983433	0.999443
101928841	'LOC101928841'	mRNA	1.62	1.78	1.56	1.22	1.4	1.27	1.29667	1.65333	1.17	1.32	1.15	0.87	1.02	0.93	0.94	1.21333	152	178	146	117	135.9	123	125.3	158.667	-0.382882	0.0248239	0.999443
101928991	'CCDC92B'	mRNA	0.17	0.27	0.31	0.43	0.26	0.52	0.403333	0.25	0.12	0.2	0.23	0.3	0.19	0.38	0.29	0.183333	8	14	15	21	13	26	20	12.3333	0.655469	0.18381	0.999443
101929400	'LOC101929400'	mRNA	0.12	0.11	0.05	0	0	0	0	0.0933333	0.09	0.08	0.04	0	0	0	0	0.07	1	1	1	0	0	0	0	1	-2.48324	0.333646	0.999443
101929601	'LOC101929601'	mRNA	0	0	0	0	0.05	0	0.0166667	0	0	0	0	0	0.04	0	0.0133333	0	0	0	0	0	1	0	0.333333	0	0.92125	0.82138	0.999443
101929692	'LOC101929692'	mRNA	0.08	0	0.07	0.32	0	0.19	0.17	0.05	0.06	0	0.05	0.23	0	0.14	0.123333	0.0366667	1.19	0	1	5	0	3.06	2.68667	0.73	1.9427	0.251249	0.999443
101929726	'MYMX'	mRNA	0.16	0.15	0.33	0.32	0.16	0	0.16	0.213333	0.12	0.11	0.24	0.22	0.11	0	0.11	0.156667	1	1	2	2	1	0	1	1.33333	-0.470067	0.786427	0.999443
101929937	'LOC101929937'	mRNA	0.07	0.13	0	0	0	0.07	0.0233333	0.0666667	0.05	0.1	0	0	0	0.05	0.0166667	0.05	1	2	0	0	0	1	0.333333	1	-1.51189	0.52711	0.999443
101929959	'LOC101929959'	mRNA	7.34	5.09	7.05	5.71	6.72	6.07	6.16667	6.49333	5.32	3.78	5.17	4.05	4.91	4.44	4.46667	4.75667	84.83	63.74	76.72	60.29	72.14	68.2	66.8767	75.0967	-0.196816	0.402649	0.999443
101929989	'LITAFD'	mRNA	0	0.31	0	0	0	0	0	0.103333	0	0.23	0	0	0	0	0	0.0766667	0	1	0	0	0	0	0	0.333333	-1.0023	0.805965	0.999443
10193	'RNF41'	mRNA	23	21.91	21.97	22.78	21.61	20.87	21.7533	22.2933	16.68	16.29	16.13	16.14	15.78	15.25	15.7233	16.3667	885.46	902.49	840.06	891.6	853.95	821.03	855.527	876.003	-0.0751263	0.364739	0.999443
101930047	'LOC101930047'	mRNA	0.11	0.11	0	0	0	0.11	0.0366667	0.0733333	0.08	0.08	0	0	0	0.08	0.0266667	0.0533333	1	1	0	0	0	1	0.333333	0.666667	-0.928856	0.72663	0.999443
101930307	'LOC101930307'	mRNA	2.2	2.25	1.84	1.49	2.24	1.88	1.87	2.09667	1.59	1.68	1.35	1.06	1.63	1.37	1.35333	1.54	52	60	49	37	54	48	46.3333	53.6667	-0.249126	0.368542	0.999443
101930420	'LOC101930420'	mRNA	0.08	0	0.08	0	0	0	0	0.0533333	0.06	0	0.06	0	0	0	0	0.04	1.09	0	1.05	0	0	0	0	0.713333	-1.90516	0.550665	0.999443
101930434	'LOC101930434'	mRNA	0.04	0.04	0.09	0.05	0	0.13	0.06	0.0566667	0.03	0.03	0.07	0.03	0	0.1	0.0433333	0.0433333	1	1	2	1	0	3	1.33333	1.33333	-0.0411143	0.980009	0.999443
10194	'TSHZ1'	mRNA	9.37	9.47	10.18	10.81	11	10.38	10.73	9.67333	6.79	7.04	7.47	7.66	8.04	7.59	7.76333	7.1	503	545	544	595	609	582	595.333	530.667	0.125411	0.195872	0.999443
10195	'ALG3'	mRNA	66.02	64.32	73.46	69.54	67.46	60.72	65.9067	67.9333	47.87	47.82	53.93	49.25	49.26	44.39	47.6333	49.8733	937	972	1032	1009	987	896	964	980.333	-0.0657771	0.444875	0.999443
10196	'PRMT3'	mRNA	24.09	20.62	22.86	23.36	22.78	22.79	22.9767	22.5233	17.47	15.33	16.78	16.54	16.63	16.66	16.61	16.5267	606	552	572	600	591	596	595.667	576.667	0.00615442	0.948434	0.999443
10197	'PSME3'	mRNA	58.23	49.88	59.94	60.47	54.95	51.58	55.6667	56.0167	42.22	37.08	44.01	42.82	40.12	37.71	40.2167	41.1033	1883	1715	1920	1994	1834	1731	1853	1839.33	-0.0316016	0.687961	0.999443
10198	'MPHOSPH9'	mRNA	7.95	7.15	8.78	8.34	7.26	6.82	7.47333	7.96	5.76	5.31	6.45	5.91	5.3	4.98	5.39667	5.84	437	433	493	490	437	408	445	454.333	-0.0725724	0.513306	0.999443
10199	'MPHOSPH10'	mRNA	25.86	27.31	28.38	29.56	25.54	25.83	26.9767	27.1833	18.75	20.31	20.84	20.93	18.65	18.88	19.4867	19.9667	543	610	590	633	553	563	583	581	-0.0366832	0.708445	0.999443
102	'ADAM10'	mRNA	20.11	15.18	20.38	21.03	17.97	17.3	18.7667	18.5567	14.58	11.29	14.97	14.89	13.12	12.64	13.55	13.6133	1023	845	1035	1100	954	919	991	967.667	-0.00885771	0.929055	0.999443
1020	'CDK5'	mRNA	56.86	59.81	58.51	67.91	61.05	59.58	62.8467	58.3933	41.22	44.47	42.96	48.09	44.58	43.55	45.4067	42.8833	532	597	542	651	593	580	608	557	0.0853314	0.37727	0.999443
10200	'MPHOSPH6'	mRNA	22.39	20.16	18.81	21.98	17.99	16.33	18.7667	20.4533	16.24	14.99	13.81	15.57	13.14	11.94	13.55	15.0133	207	198	171	207	172	157	178.667	192	-0.145636	0.348067	0.999443
10201	'NME6'	mRNA	8.54	8.05	8.33	9.73	10.51	9.25	9.83	8.30667	6.19	5.99	6.12	6.89	7.68	6.76	7.11	6.1	327	322.99	305	374	401	357.62	377.54	318.33	0.206814	0.0737029	0.999443
10202	'DHRS2'	mRNA	1.6	2.21	1.88	1.7	1.01	1.32	1.34333	1.89667	1.16	1.64	1.38	1.2	0.74	0.96	0.966667	1.39333	25	36	29	27	16	21	21.3333	30	-0.534674	0.162099	0.999443
10203	'CALCRL'	mRNA	0.02	0.05	0.02	0.06	0.02	0	0.0266667	0.03	0.01	0.04	0.01	0.04	0.01	0	0.0166667	0.02	1	3	1	4	1	0	1.66667	1.66667	-0.0535771	0.971792	0.999443
10204	'NUTF2'	mRNA	101.15	101.35	109.13	106.55	101.31	97.09	101.65	103.877	73.34	75.35	80.13	75.46	73.98	70.97	73.47	76.2733	2107	2243	2243	2260	2172	2101	2177.67	2197.67	-0.0542927	0.429618	0.999443
10205	'MPZL2'	mRNA	11.26	8.69	10.39	10.88	10.65	9.07	10.2	10.1133	8.16	6.46	7.63	7.7	7.78	6.63	7.37	7.41667	230	186	210	245	224	199	222.667	208.667	0.0515106	0.723965	0.999443
10206	'TRIM13'	mRNA	2.22	2.24	2.29	2.64	2.48	2.19	2.43667	2.25	1.61	1.67	1.68	1.87	1.81	1.6	1.76	1.65333	163.46	176	168	198	186.8	166	183.6	169.153	0.0761097	0.615418	0.999443
10207	'PATJ'	mRNA	6.3	4.8	5.49	5.89	4.83	5.42	5.38	5.53	4.57	3.57	4.03	4.17	3.53	3.96	3.88667	4.05667	419	368.08	375	406.03	347	383	378.677	387.36	-0.0740704	0.515906	0.999443
10208	'USPL1'	mRNA	4.12	3.11	3.88	4.11	3.36	3.48	3.65	3.70333	2.99	2.31	2.85	2.91	2.46	2.54	2.63667	2.71667	206	157	196	213	170	178	187	186.333	-0.0380369	0.811249	0.999443
10209	'EIF1'	mRNA	204.45	211.28	200.23	217.8	240.53	236.69	231.673	205.32	148.24	157.08	147.01	154.25	175.64	173.03	167.64	150.777	4686	5151	4546	5092	5685	5632	5469.67	4794.33	0.151814	0.0433078	0.999443
1021	'CDK6'	mRNA	5.41	3.74	5.83	5.19	4.73	4.53	4.81667	4.99333	3.92	2.78	4.28	3.68	3.45	3.31	3.48	3.66	681	502	730	668	614	592	624.667	637.667	-0.0731523	0.5549	0.999443
10210	'TOPORS'	mRNA	11	8.86	12.11	13	11.55	10.96	11.8367	10.6567	7.97	6.59	8.89	9.2	8.43	8.01	8.54667	7.81667	470	402	514	566	508	485	519.667	462	0.126694	0.269513	0.999443
10211	'FLOT1'	mRNA	358.6	381.48	337.48	370.34	389.36	392.46	384.053	359.187	260.01	283.63	247.78	262.28	284.32	286.9	277.833	263.807	6117	6911	5782	6473	6880	6938	6763.67	6270	0.0708925	0.340541	0.999443
10212	'DDX39A'	mRNA	111.96	122.6	97.52	135.07	114.76	121.52	123.783	110.693	81.18	91.15	71.6	95.66	83.8	88.83	89.43	81.31	1549	1803	1323	1898	1630	1737	1755	1558.33	0.13145	0.168448	0.999443
10213	'PSMD14'	mRNA	69.19	54.36	63.08	61.05	58.47	57.91	59.1433	62.21	50.17	40.41	46.31	43.23	42.7	42.33	42.7533	45.63	996	832	897	896	868	866	876.667	908.333	-0.092149	0.308931	0.999443
102157402	'AK6'	mRNA	11.52	9.81	11.79	11.39	10.72	10.03	10.7133	11.04	8.35	7.29	8.65	8.07	7.83	7.33	7.74333	8.09667	176.36	159.19	176.67	178.23	170.35	159.54	169.373	170.74	-0.0528532	0.731042	0.999443
10216	'PRG4'	mRNA	0.22	0.32	0.27	0.14	0.2	0.22	0.186667	0.27	0.16	0.24	0.2	0.1	0.14	0.16	0.133333	0.2	11	16	13	7	9	10	8.66667	13.3333	-0.659244	0.246087	0.999443
10217	'CTDSPL'	mRNA	3.42	3.23	3.38	3.69	3.18	3.59	3.48667	3.34333	2.48	2.4	2.48	2.61	2.32	2.62	2.51667	2.45333	162	159	157	181	151	171	167.667	159.333	0.0321238	0.83691	0.999443
10219	'KLRG1'	mRNA	1.18	1.24	1.07	0.65	1.02	1.2	0.956667	1.16333	0.85	0.92	0.78	0.46	0.74	0.88	0.693333	0.85	21	23	19	12	18	22	17.3333	21	-0.31292	0.474126	0.999443
1022	'CDK7'	mRNA	45.96	40.11	45.01	48.62	44.1	46.6	46.44	43.6933	33.32	29.82	33.05	34.43	32.2	34.06	33.5633	32.0633	589	545	568	634	583	619	612	567.333	0.0682445	0.472608	0.999443
10220	'GDF11'	mRNA	19.91	21.61	21.43	24.61	23.53	21.81	23.3167	20.9833	14.44	16.06	15.73	17.43	17.18	15.95	16.8533	15.41	711	760	761	849	794	713	785.333	744	0.0362641	0.692837	0.999443
10221	'TRIB1'	mRNA	7.74	6.56	8.22	7.45	7.77	7.72	7.64667	7.50667	5.61	4.88	6.04	5.28	5.67	5.64	5.53	5.51	285	257	298	280	295	295	290	280	0.0100253	0.937268	0.999443
10223	'GPA33'	mRNA	0.04	0	0	0	0	0	0	0.0133333	0.03	0	0	0	0	0	0	0.01	1	0	0	0	0	0	0	0.333333	-1.0023	0.805965	0.999443
10224	'ZNF443'	mRNA	0.72	1.03	1.12	0.86	0.76	0.78	0.8	0.956667	0.52	0.76	0.82	0.61	0.56	0.57	0.58	0.7	18.33	27.83	28.26	22.43	20.02	20.66	21.0367	24.8067	-0.277421	0.488594	0.999443
10225	'CD96'	mRNA	0.11	0.05	0.1	0.02	0.05	0.04	0.0366667	0.0866667	0.08	0.04	0.07	0.02	0.03	0.03	0.0266667	0.0633333	4.84	2.43	3.62	1	2.06	1.87	1.64333	3.63	-1.20903	0.349187	0.999443
10226	'PLIN3'	mRNA	50.31	53.83	45.28	49.42	42.09	50.01	47.1733	49.8067	36.47	40.02	33.24	35	30.74	36.56	34.1	36.5767	1094	1245	975	1096	944	1129	1056.33	1104.67	-0.10422	0.285521	0.999443
10227	'MFSD10'	mRNA	36.12	33.73	33.74	34.95	33.81	37.89	35.55	34.53	26.19	25.08	24.77	24.75	24.69	27.7	25.7133	25.3467	599	602	559	595	583	660	612.667	586.667	0.0229612	0.81482	0.999443
10228	'STX6'	mRNA	14.15	13.22	14.78	14.26	12.29	13.51	13.3533	14.05	10.26	9.83	10.85	10.1	8.97	9.88	9.65	10.3133	706	701	727	725	632	699	685.333	711.333	-0.0952206	0.297605	0.999443
102288414	'C11orf98'	mRNA	150.95	169.13	144.32	167.2	163.39	150.71	160.433	154.8	109.45	125.74	105.96	118.41	119.31	110.17	115.963	113.717	636.17	755.68	589.85	716.21	709.64	662.67	696.173	660.567	0.0363306	0.719794	0.999443
10229	'COQ7'	mRNA	5.12	4.35	4.61	5.87	5.81	5.71	5.79667	4.69333	3.71	3.23	3.38	4.16	4.25	4.17	4.19333	3.44	135	122	120	158	158	156	157.333	125.667	0.283896	0.0866009	0.999443
10231	'RCAN2'	mRNA	0	0	0	0.03	0.06	0	0.03	0	0	0	0	0.02	0.04	0	0.02	0	0	0	0	1	2	0	1	0	2.40266	0.384663	0.999443
10232	'MSLN'	mRNA	227.11	248.87	211.88	227.22	249.13	262.97	246.44	229.287	164.67	185.03	155.57	160.92	181.92	192.24	178.36	168.423	4834	5632	4469	4932	5469	5808	5403	4978.33	0.0808209	0.362078	0.999443
10233	'LRRC23'	mRNA	20.04	20.3	17.16	18.7	19.69	23.88	20.7567	19.1667	14.53	15.09	12.6	13.24	14.38	17.46	15.0267	14.0733	266	283	228	259	277	325	287	259	0.110151	0.427642	0.999443
10234	'LRRC17'	mRNA	0	0	0	0	0	0.05	0.0166667	0	0	0	0	0	0	0.03	0.01	0	0	0	0	0	0	1	0.333333	0	0.92125	0.82138	0.999443
10235	'RASGRP2'	mRNA	0.05	0	0	0.05	0.04	0.2	0.0966667	0.0166667	0.03	0	0	0.03	0.03	0.15	0.07	0.01	1	0	0	1	1	5	2.33333	0.333333	2.67113	0.153913	0.999443
10236	'HNRNPR'	mRNA	128.14	110.07	133.8	137.1	131.85	116.88	128.61	124.003	92.91	81.83	98.24	97.1	96.28	85.44	92.94	90.9933	3404	3107	3488	3717	3579	3217	3504.33	3333	0.0302158	0.689445	0.999443
10237	'SLC35B1'	mRNA	55.76	51.25	60.34	54.85	50.15	50.92	51.9733	55.7833	40.43	38.1	44.3	38.84	36.62	37.22	37.56	40.9433	825	807	882	826	762	782	790	838	-0.126702	0.147835	0.999443
10238	'DCAF7'	mRNA	37.07	33.37	38.84	37.24	35.74	33.7	35.56	36.4267	26.88	24.81	28.51	26.37	26.1	24.63	25.7	26.7333	2483.25	2379.01	2585	2546	2469	2341.79	2452.26	2482.42	-0.0592567	0.400321	0.999443
10239	'AP3S2'	mRNA	2.92	3.89	5.08	5.6	5.04	3.14	4.59333	3.96333	2.11	2.89	3.73	3.96	3.68	2.29	3.31	2.91	170.12	241.6	294.44	333.29	303.15	189.96	275.467	235.387	0.180533	0.581425	0.999443
1024	'CDK8'	mRNA	11.27	9.8	11.93	12.77	11.59	11.11	11.8233	11	8.17	7.29	8.76	9.05	8.47	8.12	8.54667	8.07333	330	299	348	376	370	357	367.667	325.667	0.133588	0.255609	0.999443
10240	'MRPS31'	mRNA	17.7	15.12	17.86	17.66	14.3	16.61	16.19	16.8933	12.84	11.24	13.11	12.5	10.44	12.14	11.6933	12.3967	239	217	238	243	199	233	225	231.333	-0.0819559	0.555818	0.999443
10241	'CALCOCO2'	mRNA	26.38	22.47	27.63	27.98	25.87	25.88	26.5767	25.4933	19.13	16.71	20.29	19.81	18.89	18.92	19.2067	18.71	983	891	1022	1064	994	1001	1019.67	965.333	0.0372101	0.667189	0.999443
10243	'GPHN'	mRNA	7.1	6.44	6.32	6.56	7.21	7.31	7.02667	6.62	5.15	4.79	4.64	4.64	5.27	5.34	5.08333	4.86	263	252	235	250	276	281	269	250	0.0665987	0.61208	0.999443
10244	'RABEPK'	mRNA	45.73	51.49	41.42	45.54	46.11	50.31	47.32	46.2133	33.16	38.28	30.41	32.25	33.67	36.78	34.2333	33.95	550	665	497	572	564	623	586.333	570.667	0.000541	0.996129	0.999443
10245	'TIMM17B'	mRNA	176.73	165.24	157.26	167.01	179.71	167.52	171.413	166.41	128.14	122.85	115.46	118.28	131.23	122.46	123.99	122.15	1390	1384	1207	1337	1448	1363	1382.67	1327	0.0203068	0.806312	0.999443
10247	'RIDA'	mRNA	18.91	15.8	19.14	18.32	18.95	18.9	18.7233	17.95	13.71	11.75	14.05	12.98	13.84	13.82	13.5467	13.17	151	134	150	149	156	157	154	145	0.0464399	0.775871	0.999443
10248	'POP7'	mRNA	105.58	111.53	95.41	103.11	103.47	102.3	102.96	104.173	76.55	82.92	70.05	73.02	75.55	74.78	74.45	76.5067	683	766	604	679	690	689	686	684.333	-0.035502	0.719897	0.999443
1025	'CDK9'	mRNA	44.53	49.37	45.52	43.53	45.51	45.41	44.8167	46.4733	32.29	36.71	33.42	30.83	33.24	33.2	32.4233	34.14	1092	1288	1106	1089	1151	1156	1132	1162	-0.0767446	0.380314	0.999443
10250	'SRRM1'	mRNA	47.77	55.51	54.77	51.61	51.35	53.77	52.2433	52.6833	34.64	41.27	40.21	36.55	37.5	39.31	37.7867	38.7067	2014	2412	2276	2185	2195	2333	2237.67	2234	-0.0374369	0.643989	0.999443
10251	'SPRY3'	mRNA	0.05	0.05	0.01	0.06	0.05	0.04	0.05	0.0366667	0.04	0.04	0.01	0.04	0.04	0.03	0.0366667	0.03	5	5	1	6	5	4	5	3.66667	0.409094	0.655602	0.999443
10252	'SPRY1'	mRNA	0.43	0.28	0.39	0.41	0.21	0.3	0.306667	0.366667	0.31	0.21	0.29	0.29	0.15	0.22	0.22	0.27	14	10	12	14	5	10	9.66667	12	-0.358258	0.540587	0.999443
10253	'SPRY2'	mRNA	6.85	5.38	6.66	6.27	7.14	6.43	6.61333	6.29667	4.97	4	4.89	4.44	5.21	4.7	4.78333	4.62	153	129	149	141	163	149	151	143.667	0.0317614	0.850145	0.999443
10254	'STAM2'	mRNA	2.95	2.4	3.04	3.15	2.83	2.9	2.96	2.79667	2.14	1.78	2.23	2.23	2.07	2.12	2.14	2.05	170	147	174	185	168	173	175.333	163.667	0.0575048	0.712055	0.999443
10256	'CNKSR1'	mRNA	12.5	13.35	12.9	14.82	14.01	13.64	14.1567	12.9167	9.06	9.92	9.47	10.5	10.23	9.97	10.2333	9.48333	314	357	321	380	363	356	366.333	330.667	0.10724	0.348991	0.999443
10257	'ABCC4'	mRNA	8.67	6.36	8.24	9.39	7.5	7.65	8.18	7.75667	6.29	4.73	6.05	6.65	5.48	5.59	5.90667	5.69	513	411	502	572	467	480	506.333	475.333	0.04785	0.681753	0.999443
1026	'CDKN1A'	mRNA	144.49	142.17	142.48	131.8	126.46	124.11	127.457	143.047	104.77	105.7	104.61	93.34	92.35	90.72	92.1367	105.027	2971	3109	2899	2762	2680	2649	2697	2993	-0.190636	0.00266085	0.67105
10260	'DENND4A'	mRNA	2.92	1.79	3.35	2.78	2.46	2.58	2.60667	2.68667	2.12	1.33	2.46	1.97	1.8	1.88	1.88333	1.97	227	161	257	231	210	205	215.333	215	-0.0414308	0.802693	0.999443
10262	'SF3B4'	mRNA	156.35	155.56	159.09	171.45	156.15	146.21	157.937	157	113.36	115.66	116.8	121.42	114.03	106.88	114.11	115.273	2211	2339	2222	2472	2277	2148	2299	2257.33	-0.0150225	0.829985	0.999443
10263	'CDK2AP2'	mRNA	89.25	93.97	85.74	87.34	88.63	89.95	88.64	89.6533	64.72	69.86	62.95	61.86	64.72	65.75	64.11	65.8433	650	729	609	645	663	679	662.333	662.667	-0.0398496	0.680132	0.999443
10265	'IRX5'	mRNA	9.16	8.65	9.07	10.72	9.82	10.61	10.3833	8.96	6.64	6.43	6.66	7.59	7.17	7.76	7.50667	6.57667	216	217	212	258	239	260	252.333	215	0.190346	0.15172	0.999443
10267	'RAMP1'	mRNA	0	0	0.17	0	0	0	0	0.0566667	0	0	0.12	0	0	0	0	0.04	0	0	1	0	0	0	0	0.333333	-1.0023	0.805965	0.999443
10269	'ZMPSTE24'	mRNA	15.22	10.57	15.65	17.08	13.53	14.89	15.1667	13.8133	11.04	7.86	11.49	12.09	9.88	10.88	10.95	10.13	456	337	465	522	418	463	467.667	419.333	0.11362	0.384764	0.999443
1027	'CDKN1B'	mRNA	62.92	58.44	63.94	66.19	70.38	65.97	67.5133	61.7667	45.62	43.45	46.94	46.88	51.39	48.23	48.8333	45.3367	1493	1475	1503	1602	1722	1625	1649.67	1490.33	0.106551	0.157854	0.999443
10270	'AKAP8'	mRNA	16.31	16.6	13.99	16.69	15.81	17.07	16.5233	15.6333	11.82	12.34	10.27	11.82	11.55	12.48	11.95	11.4767	613	664	522	640	613	666	639.667	599.667	0.0539947	0.599166	0.999443
10272	'FSTL3'	mRNA	114.84	123.05	107.24	117.02	100.92	104.82	107.587	115.043	83.27	91.48	78.73	82.87	73.7	76.62	77.73	84.4933	2839	3236	2627	2951	2573	2690	2738	2900.67	-0.123809	0.11822	0.999443
102723360	'LOC102723360'	mRNA	3.52	1.9	0.61	0.13	1.19	1.86	1.06	2.01	2.55	1.41	0.45	0.09	0.87	1.36	0.773333	1.47	124.99	97.38	28.2	8.2	71.59	70.21	50	83.5233	-0.758676	0.443124	0.999443
102723475	'KCNE1B'	mRNA	0	0.06	0	0	0	0.03	0.01	0.02	0	0.04	0	0	0	0.02	0.00666667	0.0133333	0	2	0	0	0	1	0.333333	0.666667	-0.923748	0.743894	0.999443
102723553	'SMIM11B'	mRNA	1.74	24.34	15.94	18.73	9.42	3.66	10.6033	14.0067	1.26	18.1	11.7	13.26	6.88	2.67	7.60333	10.3533	25.7	189.49	114.17	141.49	80.59	47.29	89.79	109.787	-0.340217	0.686449	0.999443
102723555	'SPDYE16'	mRNA	0.12	0	0.06	0	0	0.12	0.04	0.06	0.09	0	0.05	0	0	0.09	0.03	0.0466667	2	0	0.98	0	0	0.94	0.313333	0.993333	-1.89447	0.585096	0.999443
102723655	'LOC102723655'	mRNA	0	0	0	0.04	0	0.03	0.0233333	0	0	0	0	0.03	0	0.02	0.0166667	0	0	0	0	2	0	1.4	1.13333	0	2.38627	0.390142	0.999443
102723722	'LOC102723722'	mRNA	2.21	0.69	1.81	2.63	1.61	3.05	2.43	1.57	1.6	0.51	1.33	1.86	1.17	2.23	1.75333	1.14667	13.56	4.5	10.89	16.45	10.19	19.52	15.3867	9.65	0.693589	0.23089	0.999443
102723728	'LOC102723728'	mRNA	25.2	30.14	29.34	24.76	29.1	25.4	26.42	28.2267	18.27	22.41	21.54	17.54	21.25	18.57	19.12	20.74	361.04	459.28	415.27	361.78	430.01	378.12	389.97	411.863	-0.11819	0.338362	0.999443
102723750	'LOC102723750'	mRNA	0	0	0.02	0	0	0.04	0.0133333	0.00666667	0	0	0.01	0	0	0.03	0.01	0.00333333	0	0	1	0	0	2	0.666667	0.333333	0.869389	0.757806	0.999443
102723859	'TBC1D3E'	mRNA	5.37	5.5	4.56	6.43	5.4	6.08	5.97	5.14333	3.89	4.09	3.35	4.56	3.94	4.44	4.31333	3.77667	129.46	141.07	109.03	158.23	134.25	152.16	148.213	126.52	0.188102	0.276997	0.999443
102723996	'LOC102723996'	mRNA	1.35	1.51	1.48	1.6	1.49	1.12	1.40333	1.44667	0.98	1.12	1.09	1.14	1.09	0.82	1.01667	1.06333	38.57	44.4	42.5	51.49	44.92	36.24	44.2167	41.8233	0.0367882	0.90021	0.999443
102724023	'GATD3B'	mRNA	48.56	53.51	40.91	56.15	46.18	57.97	53.4333	47.66	35.21	39.78	30.04	39.77	33.72	42.38	38.6233	35.01	705.5	826.85	588.28	834.59	691.2	875.16	800.317	706.877	0.140403	0.229263	0.999443
102724127	'TP53TG3F'	mRNA	0	0	0.17	0	0	0.05	0.0166667	0.0566667	0	0	0.12	0	0	0.03	0.01	0.04	0	0	2.11	0	0	0.6	0.2	0.703333	-1.91633	0.578101	0.999443
102724151	'LOC102724151'	mRNA	0	0	0	0	0.05	0	0.0166667	0	0	0	0	0	0.04	0	0.0133333	0	0	0	0	0	1	0	0.333333	0	0.92125	0.82138	0.999443
102724159	'LOC102724159'	mRNA	13.15	15.7	13.7	15.6	16.41	12.48	14.83	14.1833	9.53	11.67	10.06	11.05	11.99	9.12	10.72	10.42	424.96	539.74	439.28	514.25	547.01	418.46	493.24	467.993	0.0370632	0.76322	0.999443
102724197	'LOC102724197'	mRNA	0.79	0.85	0.68	0.87	1.48	0.68	1.01	0.773333	0.57	0.63	0.5	0.62	1.08	0.5	0.733333	0.566667	15.13	15.98	13.05	15.82	28.45	13.09	19.12	14.72	0.343969	0.47663	0.999443
102724200	'LOC102724200'	mRNA	0.26	0.07	0.4	0.51	0.7	0.28	0.496667	0.243333	0.19	0.05	0.29	0.36	0.51	0.2	0.356667	0.176667	8.46	2.55	13	17.1	23.51	9.42	16.6767	8.00333	1.04481	0.0940271	0.999443
102724219	'LOC102724219'	mRNA	0.03	0.97	1.04	3	0.38	1.15	1.51	0.68	0.02	0.72	0.77	2.13	0.28	0.84	1.08333	0.503333	2.21	42.98	66.63	147.66	10.12	38.99	65.59	37.2733	0.754401	0.59122	0.999443
102724250	'LOC102724250'	mRNA	5.46	4.9	5	6.51	5.29	5.2	5.66667	5.12	3.96	3.65	3.67	4.61	3.87	3.8	4.09333	3.76	256.21	244.91	233.42	308.91	257.98	254.16	273.683	244.847	0.118119	0.368245	0.999443
102724265	'LOC102724265'	mRNA	0	0.04	0	0	0	0	0	0.0133333	0	0.03	0	0	0	0	0	0.01	0	1	0	0	0	0	0	0.333333	-1.0023	0.805965	0.999443
102724398	'CH507-42P11.6'	mRNA	4.06	4.52	4.33	4.71	4.51	4.94	4.72	4.30333	2.94	3.36	3.18	3.33	3.29	3.61	3.41	3.16	488	580	518	579	559	616	584.667	528.667	0.105426	0.304271	0.999443
102724428	'SIK1B'	mRNA	83.81	86.12	82.1	84.51	86.8	88.66	86.6567	84.01	60.77	64.02	60.28	59.85	63.38	64.81	62.68	61.69	4151.26	4539.86	4039.29	4269.93	4434.39	4558.04	4420.79	4243.47	0.0200157	0.772478	0.999443
102724474	'LOC102724474'	mRNA	1.31	1.81	1.77	2.31	2.03	2.02	2.12	1.63	0.95	1.34	1.3	1.64	1.49	1.48	1.53667	1.19667	15	22	20	27	24	24	25	19	0.354591	0.378389	0.999443
102724488	'LOC102724488'	mRNA	0.17	0.11	0.23	0.19	0.14	0.14	0.156667	0.17	0.12	0.08	0.17	0.13	0.1	0.11	0.113333	0.123333	18.63	14.1	28.26	23.77	16.48	19	19.75	20.33	-0.0948638	0.829376	0.999443
102724560	'CBSL'	mRNA	28.56	27.02	29.5	23.28	29.28	18.96	23.84	28.36	20.71	20.09	21.66	16.49	21.38	13.86	17.2433	20.82	733.7	733.09	743.49	611.69	776.38	505.63	631.233	736.76	-0.263348	0.0347696	0.999443
102724594	'U2AF1L5'	mRNA	193.79	141.28	178.03	153.57	123.18	142.82	139.857	171.033	140.52	105.04	130.71	108.76	89.95	104.41	101.04	125.423	1465.24	1131.03	1316.34	1180.36	955.28	1119.02	1084.89	1304.2	-0.308207	0.00264501	0.67105
102724631	'POTEB3'	mRNA	0	0	0	0	0	0.02	0.00666667	0	0	0	0	0	0	0.01	0.00333333	0	0	0	0	0	0	1	0.333333	0	0.92125	0.82138	0.999443
102724642	'LOC102724642'	mRNA	0.81	0.82	0.52	0.65	0.84	0.77	0.753333	0.716667	0.59	0.61	0.38	0.46	0.62	0.56	0.546667	0.526667	20.33	21.8	12.89	16.56	21.85	20.1	19.5033	18.34	0.0687139	0.877634	0.999443
102724646	'LOC102724646'	mRNA	0.02	0	0.1	0.02	0	0.07	0.03	0.04	0.02	0	0.07	0.02	0	0.05	0.0233333	0.03	1	0	4	1	0	3	1.33333	1.66667	-0.370997	0.822312	0.999443
102724652	'CRYAA2'	mRNA	0	0	0	0	0.11	0	0.0366667	0	0	0	0	0	0.08	0	0.0266667	0	0	0	0	0	1	0	0.333333	0	0.92125	0.82138	0.999443
102724751	'LOC102724751'	mRNA	1.3	1.18	0.79	0.58	2.14	1.81	1.51	1.09	0.94	0.88	0.58	0.41	1.56	1.32	1.09667	0.8	11.38	10.25	6.97	6.08	18.81	14.92	13.27	9.53333	0.461798	0.44464	0.999443
102724770	'LOC102724770'	mRNA	24.14	26.15	21.83	19.45	22.92	22.66	21.6767	24.04	17.5	19.44	16.03	13.77	16.74	16.56	15.69	17.6567	227.43	261.78	202.35	186.7	222.61	221.95	210.42	230.52	-0.171199	0.25048	0.999443
102724788	'LOC102724788'	mRNA	2.83	3.33	2.23	2.62	2.53	2.71	2.62	2.79667	2.05	2.48	1.64	1.85	1.84	1.98	1.89	2.05667	62	73	48	60	54	62	58.6667	61	-0.0952674	0.707916	0.999443
102724813	'LOC102724813'	mRNA	2.67	2.07	1.89	4.07	3.08	1.41	2.85333	2.21	1.94	1.54	1.39	2.88	2.25	1.03	2.05333	1.62333	9	7.14	6.02	12	9	6	9	7.38667	0.251717	0.702526	0.999443
102724843	'LOC102724843'	mRNA	10.59	9.18	10.77	9.34	10.54	8.6	9.49333	10.18	7.68	6.83	7.91	6.62	7.7	6.28	6.86667	7.47333	451.65	429.28	460.78	381.9	428.2	409.54	406.547	447.237	-0.177592	0.106634	0.999443
102724862	'TBC1D3I'	mRNA	0.08	0	0.22	0.15	0	0.11	0.0866667	0.1	0.06	0	0.16	0.11	0	0.08	0.0633333	0.0733333	2.37	0	6.22	4.89	0	3.37	2.75333	2.86333	-0.253511	0.848701	0.999443
102724877	'LOC102724877'	mRNA	0	0.05	0	0	0.11	0	0.0366667	0.0166667	0	0.04	0	0	0.08	0	0.0266667	0.0133333	0	1	0	0	2	0	0.666667	0.333333	0.87035	0.758205	0.999443
102724951	'LOC102724951'	mRNA	0.72	1.08	2.97	0.74	0	0.73	0.49	1.59	0.52	0.81	2.18	0.53	0	0.53	0.353333	1.17	16.68	29.4	99.54	19.45	0	43.86	21.1033	48.54	-1.26596	0.434511	0.999443
102724965	'LOC102724965'	mRNA	1.13	0.58	0.96	1	0.43	0.84	0.756667	0.89	0.82	0.43	0.7	0.71	0.31	0.62	0.546667	0.65	31	17	26	28	12	24	21.3333	24.6667	-0.255229	0.547557	0.999443
102725035	'LOC102725035'	mRNA	0	0	0	0.09	0	0	0.03	0	0	0	0	0.06	0	0	0.02	0	0	0	0	2	0	0	0.666667	0	1.78442	0.614213	0.999443
102725180	'LOC102725180'	mRNA	0	0.07	0.04	0.11	0	0	0.0366667	0.0366667	0	0.05	0.03	0.08	0	0	0.0266667	0.0266667	0	2	1	3	0	0	1	1	-0.0640616	0.975031	0.999443
10273	'STUB1'	mRNA	139.31	146.39	117.72	128.18	136.77	144.45	136.467	134.473	101.01	108.84	86.43	90.78	99.88	105.6	98.7533	98.76	1659	1853	1381	1555	1677	1786	1672.67	1631	-0.000939	0.992379	0.999443
10274	'STAG1'	mRNA	7.08	5.96	5.98	9.48	6.95	6.53	7.65333	6.34	5.13	4.43	4.39	6.72	5.08	4.77	5.52333	4.65	429	364	367	563	414	399	458.667	386.667	0.202463	0.117424	0.999443
10276	'NET1'	mRNA	15.59	12.59	15.14	14.46	14.06	13.15	13.89	14.44	11.31	9.36	11.12	10.24	10.27	9.61	10.04	10.5967	636	551	614	604	594	559	585.667	600.333	-0.0769863	0.436847	0.999443
10277	'UBE4B'	mRNA	30.14	28.28	32.48	34.91	30.27	30.59	31.9233	30.3	21.85	21.03	23.85	24.72	22.1	22.36	23.06	22.2433	1745	1747	1874	2068	1813	1836	1905.67	1788.67	0.0491129	0.515848	0.999443
10279	'PRSS16'	mRNA	0.45	0.45	0.29	0.36	0.46	0.46	0.426667	0.396667	0.33	0.34	0.21	0.26	0.34	0.34	0.313333	0.293333	10	11	7	8	12	12	10.6667	9.33333	0.157015	0.791408	0.999443
1028	'CDKN1C'	mRNA	96.86	100.84	86.31	93.36	88.1	100.15	93.87	94.67	70.23	74.97	63.37	66.12	64.33	73.21	67.8867	69.5233	1542	1719	1352	1543	1462	1674	1559.67	1537.67	-0.0183075	0.83982	0.999443
10280	'SIGMAR1'	mRNA	330.99	331.11	344.28	317.62	319.38	309.43	315.477	335.46	239.99	246.17	252.77	224.94	233.22	226.2	228.12	246.31	5137	5461	5280	5018	5108	4985	5037	5292.67	-0.11157	0.0693425	0.999443
102800317	'TPTEP2-CSNK1E'	mRNA	1.09	2.6	1.44	1.06	1.5	0.98	1.18	1.71	0.79	1.93	1.06	0.75	1.1	0.72	0.856667	1.26	37.52	95.65	49.49	37.53	53.5	35.13	42.0533	60.8867	-0.569645	0.0857557	0.999443
10282	'BET1'	mRNA	33.25	26.16	33.56	31.23	31.74	27.92	30.2967	30.99	24.11	19.45	24.64	22.11	23.18	20.41	21.9	22.7333	447	374	442	428	440	390	419.333	421	-0.0471247	0.682539	0.999443
10283	'CWC27'	mRNA	28.62	26.81	31.68	27	30.59	27.4	28.33	29.0367	20.75	19.93	23.26	19.12	22.34	20.03	20.4967	21.3133	538	546	531	528	580	562	556.667	538.333	0.00878802	0.929248	0.999443
10284	'SAP18'	mRNA	64.02	61.15	63.21	64.87	65.86	72.26	67.6633	62.7933	46.42	45.46	46.41	45.94	48.1	52.82	48.9533	46.0967	1444	1468	1413	1493	1534	1693	1573.33	1441.67	0.086773	0.279706	0.999443
10285	'SMNDC1'	mRNA	20.98	15.38	20.09	20.52	18.82	19.19	19.51	18.8167	15.21	11.43	14.75	14.53	13.75	14.03	14.1033	13.7967	542	432	497	542	502	511	518.333	490.333	0.038525	0.723541	0.999443
10286	'BCAS2'	mRNA	57.22	50.55	58.6	63.52	49.5	57.72	56.9133	55.4567	41.49	37.58	43.02	44.99	36.15	42.2	41.1133	40.6967	639	600	645	723	570	670	654.333	628	0.0168461	0.868334	0.999443
10287	'RGS19'	mRNA	47.05	47.72	47.12	45.31	42.91	41.17	43.13	47.2967	34.12	35.48	34.59	32.09	31.33	30.09	31.17	34.73	666	722	648	647	624	601	624	678.667	-0.161608	0.0778677	0.999443
10288	'LILRB2'	mRNA	0.04	0	0	0	0	0	0	0.0133333	0.03	0	0	0	0	0	0	0.01	1	0	0	0	0	0	0	0.333333	-1.0023	0.805965	0.999443
10289	'EIF1B'	mRNA	41.46	30.78	43	35.05	37.78	35.04	35.9567	38.4133	30.06	22.88	31.57	24.82	27.59	25.61	26.0067	28.17	331	261	337	285	311	291	295.667	309.667	-0.107726	0.421924	0.999443
1029	'CDKN2A'	mRNA	511.67	528.76	527.1	501.93	561.05	508.79	523.923	522.51	371	393.12	387	355.47	409.7	371.93	379.033	383.707	4952	5427	4804	4752	5382	5078	5070.67	5061	-0.0356847	0.633443	0.999443
10290	'SPEG'	mRNA	7.79	8.64	6.65	7.24	7.06	8.03	7.44333	7.69333	5.65	6.42	4.88	5.12	5.15	5.87	5.38	5.65	402	465	332	372	379	421	390.667	399.667	-0.0708208	0.577156	0.999443
10291	'SF3A1'	mRNA	45.33	45.36	47.56	48.31	47.5	43.74	46.5167	46.0833	32.87	33.72	34.92	34.21	34.68	31.98	33.6233	33.8367	2418	2575	2520	2630	2613	2421	2554.67	2504.33	-0.012108	0.858917	0.999443
10293	'TRAIP'	mRNA	14.7	17.51	17.16	18.02	19.02	16.64	17.8933	16.4567	10.66	13.02	12.6	12.76	13.89	12.16	12.9367	12.0933	287	363	331	359	381	337	359	327	0.094556	0.444712	0.999443
10294	'DNAJA2'	mRNA	38.22	33.26	37.64	42.31	36.99	38.19	39.1633	36.3733	27.71	24.72	27.63	29.96	27.01	27.92	28.2967	26.6867	1159	1073	1132	1309	1157	1202	1222.67	1121.33	0.0830528	0.299988	0.999443
10295	'BCKDK'	mRNA	95.06	104.16	97.09	96.04	91.67	90.38	92.6967	98.77	68.93	77.44	71.29	68.02	66.94	66.07	67.01	72.5533	1881	2187	1892	1957	1879	1873	1903	1986.67	-0.10219	0.177001	0.999443
10296	'MAEA'	mRNA	30.96	29.49	28.09	37.64	31.96	35.45	35.0167	29.5133	22.45	21.93	20.62	26.66	23.34	25.92	25.3067	21.6667	652	662	582	812	695	774	760.333	632	0.225917	0.0166966	0.999443
10297	'APC2'	mRNA	0.07	0.04	0.04	0.06	0.05	0.06	0.0566667	0.05	0.05	0.03	0.03	0.04	0.03	0.05	0.04	0.0366667	7	4	4	7	5	7	6.33333	5	0.29976	0.702057	0.999443
10298	'PAK4'	mRNA	39.23	40.27	33.16	35.15	36.23	38.3	36.56	37.5533	28.44	29.94	24.35	24.9	26.46	28	26.4533	27.5767	1148	1260	983	1046	1102	1177	1108.33	1130.33	-0.0663601	0.489481	0.999443
10299	'MARCHF6'	mRNA	74.97	57.55	70.12	71.78	70.95	65.96	69.5633	67.5467	54.36	42.79	51.48	50.84	51.81	48.22	50.29	49.5433	3612	2938	3536	3508	3371	3221	3366.67	3362	-0.0400638	0.631951	0.999443
103	'ADAR'	mRNA	44.72	40.75	45.4	47.79	41.71	41.85	43.7833	43.6233	32.42	30.29	33.33	33.84	30.46	30.59	31.63	32.0133	3096	3005	3126	3386	2984	3009	3126.33	3075.67	-0.0184955	0.784835	0.999443
1030	'CDKN2B'	mRNA	4.48	4.79	4.87	3.85	3.96	5.12	4.31	4.71333	3.25	3.56	3.58	2.73	2.89	3.74	3.12	3.46333	178	203	192	156	162	211	176.333	191	-0.153985	0.34243	0.999443
10300	'KATNB1'	mRNA	27.14	31.91	26.45	29.2	27.51	30.51	29.0733	28.5	19.68	23.72	19.42	20.68	20.09	22.31	21.0267	20.94	706	883	682	775	738	824	779	757	0.00232909	0.982123	0.999443
10302	'SNAPC5'	mRNA	23.72	24.75	25.63	25.87	26.69	22.28	24.9467	24.7	17.2	18.4	18.82	18.32	19.49	16.29	18.0333	18.14	274	305	293	303	318	267	296	290.667	-0.0144107	0.908962	0.999443
10307	'APBB3'	mRNA	7.28	7.67	6.64	7.22	6.65	8.55	7.47333	7.19667	5.28	5.7	4.87	5.12	4.85	6.25	5.40667	5.28333	151	169	137	153	142	184	159.667	152.333	0.0288535	0.864084	0.999443
10308	'ZNF267'	mRNA	3.01	2.58	3.46	3.66	2.89	3.31	3.28667	3.01667	2.18	1.92	2.54	2.59	2.11	2.42	2.37333	2.21333	100	91	114	124	99	114	112.333	101.667	0.10112	0.602512	0.999443
10309	'CCNO'	mRNA	14.28	17.78	13.05	13.92	14.57	16.68	15.0567	15.0367	10.35	13.22	9.58	9.86	10.64	12.19	10.8967	11.05	173	229	156	172	182	210	188	186	-0.0220026	0.895343	0.999443
1031	'CDKN2C'	mRNA	87.06	84.28	80.77	100.46	92.46	85.24	92.72	84.0367	63.12	62.66	59.3	71.15	67.52	62.32	66.9967	61.6933	1516	1612	1426	1833	1749	1630	1737.33	1518	0.15408	0.0408143	0.999443
10311	'VPS26C'	mRNA	17.03	16.95	18.15	17.94	17.55	15.95	17.1467	17.3767	12.35	12.6	13.32	12.71	12.81	11.66	12.3933	12.7567	540	569	566	580	571	526	559	558.333	-0.0392672	0.684256	0.999443
10312	'TCIRG1'	mRNA	31.13	34.28	26.32	27.6	30.06	32.19	29.95	30.5767	22.57	25.48	19.33	19.55	21.95	23.53	21.6767	22.46	867	1024	729	788	865	932	861.667	873.333	-0.0563885	0.617146	0.999443
10313	'RTN3'	mRNA	89.5	72.51	90.74	87.87	83.14	77.33	82.78	84.25	64.9	53.91	66.62	62.23	60.71	56.53	59.8233	61.81	2250	1947	2266	2263	2170	2027	2153.33	2154.33	-0.0427181	0.597853	0.999443
10314	'LANCL1'	mRNA	58.72	43.71	58.81	56.46	50.42	48.21	51.6967	53.7467	42.58	32.5	43.18	39.99	36.82	35.25	37.3533	39.42	2810	2226	2794	2757	2488	2393	2546	2610	-0.0788728	0.391701	0.999443
10316	'NMUR1'	mRNA	0	0	0	0	0.03	0	0.01	0	0	0	0	0	0.02	0	0.00666667	0	0	0	0	0	1	0	0.333333	0	0.92125	0.82138	0.999443
10318	'TNIP1'	mRNA	58.59	62	53.51	61.29	57.9	63.17	60.7867	58.0333	42.48	46.1	39.29	43.41	42.28	46.18	43.9567	42.6233	1639	1843	1481	1750	1651	1845	1748.67	1654.33	0.0408587	0.632303	0.999443
10319	'LAMC3'	mRNA	41.16	44.65	36.96	42.61	44.16	43.59	43.4533	40.9233	29.85	33.19	27.13	30.17	32.24	31.86	31.4233	30.0567	2482	3003	2275	2689	2745	2778	2737.33	2586.67	0.0432846	0.622833	0.999443
1032	'CDKN2D'	mRNA	10.32	10.68	8.35	7.69	7.91	9.69	8.43	9.78333	7.48	7.94	6.13	5.45	5.77	7.09	6.10333	7.18333	106	116	85	81	90	101	90.6667	102.333	-0.212337	0.304333	0.999443
10322	'SMYD5'	mRNA	32.76	32.39	33.73	33.27	32.45	31.97	32.5633	32.96	23.75	24.08	24.77	23.56	23.7	23.37	23.5433	24.2	829	872	846	859	847	840	848.667	849	-0.0410533	0.620823	0.999443
10324	'KLHL41'	mRNA	0	0.04	0.04	0	0.04	0	0.0133333	0.0266667	0	0.03	0.03	0	0.03	0	0.01	0.02	0	1	1	0	1	0	0.333333	0.666667	-0.938064	0.72349	0.999443
10325	'RRAGB'	mRNA	3.04	3.71	3.82	3.76	3	4.24	3.66667	3.52333	2.2	2.76	2.81	2.66	2.19	3.1	2.65	2.59	60	77	70	74	61	87	74	69	0.0606672	0.797709	0.999443
10326	'SIRPB1'	mRNA	0.09	0.05	0	0	0	0	0	0.0466667	0.06	0.04	0	0	0	0	0	0.0333333	1	2.9	0	0	0	0	0	1.3	-2.47271	0.367882	0.999443
10327	'AKR1A1'	mRNA	149.56	152.53	128.15	142.55	138.64	135.61	138.933	143.413	108.44	113.4	94.09	100.96	101.24	99.13	100.443	105.31	1912	2076	1625	1864	1827	1812	1834.33	1871	-0.0677401	0.419654	0.999443
10328	'EMC8'	mRNA	74.34	78.4	70.38	75.06	76.61	76.68	76.1167	74.3733	53.91	58.29	51.68	53.16	55.94	56.06	55.0533	54.6267	866	940	715	920	919	951	930	840.333	0.107579	0.272035	0.999443
10329	'RXYLT1'	mRNA	8.5	7.39	7.77	7.77	7.41	6.6	7.26	7.88667	6.16	5.5	5.7	5.5	5.41	4.82	5.24333	5.78667	159	143	143	147	143	125	138.333	148.333	-0.141825	0.393673	0.999443
1033	'CDKN3'	mRNA	97.59	95.02	104.47	101	88.09	85.74	91.61	99.0267	70.76	70.65	76.7	71.53	64.33	62.68	66.18	72.7033	630	652	664	663	590	574	609	648.667	-0.132904	0.15834	0.999443
10330	'CNPY2'	mRNA	239.12	258.5	212.05	234.62	236.13	251.26	240.67	236.557	173.38	192.19	155.69	166.16	172.43	183.67	174.087	173.753	3003	3454	2616	3017	3058	3288	3121	3024.33	0.00734765	0.933802	0.999443
10331	'B3GNT3'	mRNA	16.1	13.29	15.32	12.84	12.38	11.98	12.4	14.9033	11.67	9.88	11.25	9.09	9.04	8.76	8.96333	10.9333	392	351	391	317	318	320	318.333	378	-0.288685	0.0129902	0.999443
10333	'TLR6'	mRNA	0.75	0.63	0.96	0.85	0.56	0.68	0.696667	0.78	0.54	0.47	0.71	0.6	0.41	0.5	0.503333	0.573333	47	42	59.91	53.97	36	44	44.6567	49.6367	-0.198659	0.49067	0.999443
103344718	'HOTS'	mRNA	0.75	0.71	0.56	0.7	0.38	0.7	0.593333	0.673333	0.55	0.53	0.41	0.5	0.28	0.51	0.43	0.496667	30.19	30.18	22.34	28.79	15.65	29	24.48	27.57	-0.228826	0.555527	0.999443
10336	'PCGF3'	mRNA	5.52	5.37	5.64	6.53	5.97	5.96	6.15333	5.51	4.01	4	4.14	4.62	4.36	4.36	4.44667	4.05	348	360	353	420	388	390	399.333	353.667	0.134113	0.219627	0.999443
10342	'TFG'	mRNA	206.09	190.69	231.22	193.63	202.33	186.58	194.18	209.333	149.43	141.77	169.77	137.13	147.75	136.39	140.423	153.657	3714	3670	4087	3567	3749	3503	3606.33	3823.67	-0.125304	0.0873577	0.999443
10343	'PKDREJ'	mRNA	0	0	0.01	0	0.02	0	0.00666667	0.00333333	0	0	0.01	0	0.02	0	0.00666667	0.00333333	0	0	1	0	2	0	0.666667	0.333333	0.870315	0.75751	0.999443
10344	'CCL26'	mRNA	5.89	2.45	3.83	4.81	4.04	4.55	4.46667	4.05667	4.27	1.82	2.81	3.41	2.95	3.33	3.23	2.96667	23	9	13	17	15	17	16.3333	15	0.0815298	0.86912	0.999443
10345	'TRDN'	mRNA	0.03	0	0	0	0	0	0	0.01	0.02	0	0	0	0	0	0	0.00666667	1	0	0	0	0	0	0	0.333333	-1.0023	0.805965	0.999443
10346	'TRIM22'	mRNA	0.07	0.13	0.17	0.37	0.07	0.23	0.223333	0.123333	0.05	0.1	0.13	0.26	0.05	0.17	0.16	0.0933333	2	4	5	11	2	7	6.66667	3.66667	0.811399	0.356888	0.999443
10347	'ABCA7'	mRNA	13.47	14.78	12.06	14.18	13.66	14.42	14.0867	13.4367	9.77	10.99	8.86	10.04	9.97	10.54	10.1833	9.87333	950	1089	863	1018	989	1026	1011	967.333	0.0244279	0.788558	0.999443
10349	'ABCA10'	mRNA	0.08	0.1	0.05	0.05	0.05	0.14	0.08	0.0766667	0.06	0.08	0.03	0.03	0.03	0.1	0.0533333	0.0566667	5	7	3	3	3	9	5	5	-0.0323523	0.970099	0.999443
10350	'ABCA9'	mRNA	0.03	0.04	0.02	0.15	0.05	0.11	0.103333	0.03	0.02	0.03	0.01	0.1	0.03	0.08	0.07	0.02	2	2.83	1	10	2.86	6	6.28667	1.94333	1.7998	0.0934239	0.999443
10351	'ABCA8'	mRNA	0.48	0.28	0.59	0.55	0.56	0.62	0.576667	0.45	0.34	0.21	0.44	0.39	0.41	0.45	0.416667	0.33	25	18	31	22	25	30	25.6667	24.6667	0.0164858	0.966021	0.999443
10352	'WARS2'	mRNA	13.79	11.41	13.45	13.93	13.39	11.72	13.0133	12.8833	10	8.48	9.87	9.86	9.78	8.57	9.40333	9.45	387	337	374	396	386	339	373.667	366	-0.0117468	0.920018	0.999443
10360	'NPM3'	mRNA	84.96	80.99	81.02	70.97	80.12	86.59	79.2267	82.3233	61.6	60.21	59.49	50.26	58.51	63.3	57.3567	60.4333	575	582	537	489	559	610	552.667	564.667	-0.0691717	0.525306	0.999443
10361	'NPM2'	mRNA	0.14	0.34	0.24	0.13	0.12	0.08	0.11	0.24	0.1	0.25	0.18	0.09	0.08	0.06	0.0766667	0.176667	1	3	2	1	1	1	1	2	-1.03915	0.496334	0.999443
10362	'HMG20B'	mRNA	993.25	1117.84	931.83	1040.68	1090.81	1123.6	1085.03	1014.31	720.18	831.09	684.15	737.03	796.54	821.37	784.98	745.14	14986	17938	13894	16009	16876	17528	16804.3	15606	0.0689036	0.409231	0.999443
10363	'HMG20A'	mRNA	22.35	20.09	20.2	21.46	21.91	19.44	20.9367	20.88	16.21	14.93	14.83	15.2	16	14.21	15.1367	15.3233	620	527	583	576	600	525	567	576.667	-0.0653855	0.528682	0.999443
10365	'KLF2'	mRNA	2.05	2.89	2.25	2.67	2.75	2.83	2.75	2.39667	1.49	2.15	1.65	1.89	2.01	2.07	1.99	1.76333	58	87	63	77	80	83	80	69.3333	0.167715	0.47045	0.999443
10367	'MICU1'	mRNA	79.37	76.41	82.01	81.8	80.87	77.39	80.02	79.2633	57.55	56.81	60.21	57.93	59.06	56.57	57.8533	58.19	1859	1901	1913	1962	1956	1885	1934.33	1891	-0.00800068	0.907347	0.999443
10368	'CACNG3'	mRNA	0.11	0	0.11	0	0	0.16	0.0533333	0.0733333	0.08	0	0.08	0	0	0.12	0.04	0.0533333	2	0	2	0	0	3	1	1.33333	-0.449496	0.812679	0.999443
10370	'CITED2'	mRNA	44.52	44.63	46.6	40.87	41.76	42.18	41.6033	45.25	32.28	33.18	34.21	28.95	30.5	30.84	30.0967	33.2233	1027	1104	1048	974	1008	1025	1002.33	1059.67	-0.119993	0.142233	0.999443
10371	'SEMA3A'	mRNA	0.28	0.3	0.28	0.18	0.32	0.23	0.243333	0.286667	0.2	0.22	0.21	0.13	0.24	0.17	0.18	0.21	21	25	23	14	26	18	19.3333	23	-0.287433	0.49268	0.999443
10376	'TUBA1B'	mRNA	1742.29	1647.88	1822.3	1829.22	1521.18	1470.4	1606.93	1737.49	1263.29	1225.17	1337.95	1295.48	1110.81	1074.89	1160.39	1275.47	26237.7	26387	27116.3	28087.3	23621.8	23001.6	24903.5	26580.3	-0.137052	0.0494816	0.999443
10379	'IRF9'	mRNA	7.44	7	6.73	5.41	7.02	8	6.81	7.05667	5.4	5.2	4.94	3.83	5.13	5.85	4.93667	5.18	112	112	100	83	109	125	105.667	108	-0.068518	0.736244	0.999443
10380	'BPNT1'	mRNA	32.4	27.79	35	32.83	30.45	30.37	31.2167	31.73	23.49	20.66	25.7	23.25	22.23	22.2	22.56	23.2833	756	692	810	784	733	740	752.333	752.667	-0.0425139	0.650458	0.999443
10381	'TUBB3'	mRNA	12.87	13.7	11.69	11.22	12.44	10.84	11.5	12.7533	9.33	10.19	8.58	7.95	9.08	7.93	8.32	9.36667	208.75	235	188	185.72	206.74	183	191.82	210.583	-0.175578	0.235535	0.999443
10382	'TUBB4A'	mRNA	1.75	1.33	2.11	1.15	1.26	1.3	1.23667	1.73	1.27	0.99	1.55	0.81	0.92	0.95	0.893333	1.27	40	32	49	26	29	31	28.6667	40.3333	-0.533885	0.107218	0.999443
10383	'TUBB4B'	mRNA	667.39	685.34	639.25	690.81	569.79	593.59	618.063	663.993	483.91	509.54	469.34	489.24	416.08	433.92	446.413	487.597	9578.25	10458	9062	10108.3	8432.25	8849.99	9130.17	9699.42	-0.128831	0.071823	0.999443
10384	'BTN3A3'	mRNA	10.35	8.87	9.32	10.12	9.04	10.01	9.72333	9.51333	7.5	6.59	6.84	7.17	6.6	7.31	7.02667	6.97667	278.44	248.48	251.32	280.27	251.09	279.56	270.307	259.413	0.0191094	0.882057	0.999443
10385	'BTN2A2'	mRNA	9	8.86	8.32	8.42	9.1	8.76	8.76	8.72667	6.52	6.59	6.11	5.96	6.65	6.4	6.33667	6.40667	242.03	264	234	238	257	251	248.667	246.677	-0.0277039	0.833626	0.999443
10388	'SYCP2'	mRNA	0.06	0	0	0.02	0.03	0.06	0.0366667	0.02	0.05	0	0	0.01	0.02	0.04	0.0233333	0.0166667	2	0	0	1	1	2	1.33333	0.666667	0.965261	0.622552	0.999443
10389	'SCML2'	mRNA	4.63	3.36	3.69	3.13	3.12	3.18	3.14333	3.89333	3.36	2.5	2.71	2.22	2.28	2.33	2.27667	2.85667	159	124	145	118	118	115	117	142.667	-0.327194	0.0648873	0.999443
1039	'CDR2'	mRNA	12.97	13.28	13.77	13.91	12.96	14.11	13.66	13.34	9.41	9.87	10.11	9.85	9.47	10.31	9.87667	9.79667	348	379	365	382	359	394	378.333	364	0.0152408	0.891771	0.999443
10390	'CEPT1'	mRNA	16.38	12.71	18.65	14.47	16.04	13.27	14.5933	15.9133	11.88	9.45	13.69	10.25	11.71	9.7	10.5533	11.6733	353	291	398	318	356	296	323.333	347.333	-0.144998	0.290196	0.999443
103910	'MYL12B'	mRNA	469.5	418.04	458.32	496.13	442.84	432.69	457.22	448.62	340.42	310.8	336.5	351.37	323.37	316.31	330.35	329.24	4654.55	4403	4478	5012.95	4527	4450	4663.32	4511.85	0.0058406	0.927521	0.999443
10392	'NOD1'	mRNA	6	6.72	6.26	5.9	6.95	6.93	6.59333	6.32667	4.35	5	4.59	4.18	5.08	5.07	4.77667	4.64667	244	276	239	262	281	282	275	253	0.0811078	0.532689	0.999443
10393	'ANAPC10'	mRNA	12.66	16.45	13.18	15.88	14.25	10.83	13.6533	14.0967	9.18	12.23	9.67	11.24	10.41	7.91	9.85333	10.36	121	127	124	127	128	94	116.333	124	-0.133613	0.471111	0.999443
10395	'DLC1'	mRNA	2.15	1.85	1.96	1.96	2.33	1.72	2.00333	1.98667	1.56	1.38	1.44	1.39	1.7	1.26	1.45	1.46	136	125	124	127	152	113	130.667	128.333	-0.0139113	0.93848	0.999443
10396	'ATP8A1'	mRNA	0.82	0.62	0.87	0.87	0.8	0.69	0.786667	0.77	0.59	0.46	0.64	0.62	0.59	0.51	0.573333	0.563333	72	58	76	78	73	63	71.3333	68.6667	0.0123109	0.958156	0.999443
10397	'NDRG1'	mRNA	550.23	542.86	583.26	424.97	423.94	495.16	448.023	558.783	398.96	403.6	428.23	300.97	309.57	361.97	324.17	410.263	16812	17641	17674	13243	13356	15698	14099	17375.7	-0.340763	1.06e-05	0.0165746
10398	'MYL9'	mRNA	30.46	33.92	29.13	32.59	30.89	30.27	31.25	31.17	22.09	25.22	21.39	23.08	22.55	22.13	22.5867	22.9	838	993	795	916	877	862	885	875.333	-0.0239769	0.796494	0.999443
10399	'RACK1'	mRNA	6634.98	6564.48	6272.05	6535.77	6605.78	6583.15	6574.9	6490.5	4810.86	4880.56	4604.99	4628.72	4823.73	4812.38	4754.94	4765.47	64195	67491	59720	64432	65896	66225	65517.7	63802	-0.000917	0.988038	0.999443
104	'ADARB1'	mRNA	58.59	53.75	56.2	61.62	59.57	59.13	60.1067	56.18	42.48	39.96	41.26	43.64	43.5	43.23	43.4567	41.2333	2984	2995	2997	3276	3159	3164	3199.67	2992	0.0560125	0.365864	0.999443
1040	'CDS1'	mRNA	1.07	0.77	1.28	0.99	0.86	1.08	0.976667	1.04	0.78	0.57	0.94	0.7	0.63	0.79	0.706667	0.763333	48	37	57	46	40	50	45.3333	47.3333	-0.104742	0.717144	0.999443
10400	'PEMT'	mRNA	76.11	78.95	86.93	79.18	76.92	76.38	77.4933	80.6633	55.18	58.7	63.83	56.08	56.17	55.84	56.03	59.2367	627	692	705	668	659	651	659.333	674.667	-0.0740027	0.427558	0.999443
10401	'PIAS3'	mRNA	22.4	21.08	23.24	22.02	21.72	19.89	21.21	22.24	16.24	15.68	17.07	15.6	15.86	14.54	15.3333	16.33	653	654	672	655	653	602	636.667	659.667	-0.0921866	0.315615	0.999443
10402	'ST3GAL6'	mRNA	0.06	0.03	0.03	0.03	0.03	0.03	0.03	0.04	0.04	0.02	0.02	0.02	0.02	0.02	0.02	0.0266667	2	1	1	1	1	1	1	1.33333	-0.454851	0.786212	0.999443
10403	'NDC80'	mRNA	30.81	29.88	32.15	36.64	34.45	31.03	34.04	30.9467	22.34	22.22	23.61	25.95	25.16	22.69	24.6	22.7233	634	654	655	769	731	663	721	647.667	0.113296	0.218136	0.999443
10404	'CPQ'	mRNA	0.11	0.31	0.22	0.21	0	0.21	0.14	0.213333	0.08	0.23	0.16	0.15	0	0.15	0.1	0.156667	2	6	4	4	0	4	2.66667	4	-0.630026	0.562935	0.999443
10406	'WFDC2'	mRNA	0	0	0	0	0	0.29	0.0966667	0	0	0	0	0	0	0.21	0.07	0	0	0	0	0	0	1	0.333333	0	0.92125	0.82138	0.999443
10409	'BASP1'	mRNA	788.57	832.78	842.01	866	875.23	837.1	859.443	821.12	571.77	619.16	618.21	613.31	639.12	611.93	621.453	603.047	13443	15097	14194	15049	15385	14821	15085	14244.7	0.0426847	0.498035	0.999443
1041	'CDSN'	mRNA	0.08	0	0	0.04	0	0.08	0.04	0.0266667	0.06	0	0	0.03	0	0.06	0.03	0.02	2	0	0	1	0	2	1	0.666667	0.546991	0.803815	0.999443
10410	'IFITM3'	mRNA	1850.04	1738.24	2060.44	1877.16	1771.79	1632.1	1760.35	1882.91	1341.42	1292.35	1512.79	1329.43	1293.81	1193.09	1272.11	1382.19	7082.26	7051.83	7629.75	7300.65	6989.53	6522.25	6937.48	7254.61	-0.106341	0.110195	0.999443
10411	'RAPGEF3'	mRNA	1.81	1.91	2.02	1.35	1.68	2.12	1.71667	1.91333	1.31	1.42	1.48	0.96	1.23	1.55	1.24667	1.40333	64	71	70	46	60	78	61.3333	68.3333	-0.1932	0.448505	0.999443
10412	'NSA2'	mRNA	232.93	238.91	256.83	244.05	241.12	235.65	240.273	242.89	168.89	177.62	188.56	172.84	176.07	172.27	173.727	178.357	2209	2429	2408	2460	2422	2434	2438.67	2348.67	0.0136537	0.845114	0.999443
10413	'YAP1'	mRNA	42.55	36.8	49.59	51.29	47.24	43.66	47.3967	42.98	30.85	27.36	36.41	36.32	34.49	31.92	34.2433	31.54	2372	2170	2739	2927	2716	2535	2726	2427	0.124424	0.165679	0.999443
10417	'SPON2'	mRNA	90.05	98.26	82.32	96.31	94.36	101.57	97.4133	90.21	65.29	73.05	60.44	68.21	68.91	74.25	70.4567	66.26	1430	1689	1326	1562	1578	1657	1599	1481.67	0.0713274	0.421498	0.999443
10419	'PRMT5'	mRNA	64.82	59.28	62.39	65.44	62.41	58.64	62.1633	62.1633	47	44.07	45.81	46.34	45.57	42.87	44.9267	45.6267	1460	1422	1390	1500	1447	1367	1438	1424	-0.026801	0.714939	0.999443
10420	'TESK2'	mRNA	6.48	5.96	6.76	7.42	7.59	6.66	7.22333	6.4	4.7	4.43	4.96	5.26	5.54	4.87	5.22333	4.69667	201	194	208	235	239	210	228	201	0.140702	0.314383	0.999443
10421	'CD2BP2'	mRNA	30.77	30.45	28.08	30.14	30.57	31.61	30.7733	29.7667	22.31	22.64	20.62	21.35	22.32	23.11	22.26	21.8567	1054	1109	954	1053	1079	1124	1085.33	1039	0.0238534	0.77899	0.999443
10422	'UBAC1'	mRNA	78.82	84.72	71.89	84.13	81.82	77.64	81.1967	78.4767	57.15	62.99	52.78	59.58	59.75	56.76	58.6967	57.64	1390	1589	1254	1513	1488	1422	1474.33	1411	0.023853	0.781393	0.999443
10423	'CDIPT'	mRNA	73.31	69.58	74.04	70.28	73.62	68.06	70.6533	72.31	53.16	51.73	54.36	49.78	53.76	49.76	51.1	53.0833	1270	1281	1269	1243	1316	1225	1261.33	1273.33	-0.0537672	0.486242	0.999443
10424	'PGRMC2'	mRNA	59.44	53.6	62.06	62.66	62.22	61.37	62.0833	58.3667	43.1	39.85	45.56	44.38	45.44	44.86	44.8933	42.8367	1637	1570	1698	1763	1768	1755	1762	1635	0.0670981	0.362628	0.999443
10425	'ARIH2'	mRNA	41.72	40.34	41.36	45.21	42.16	43.05	43.4733	41.14	30.25	29.99	30.37	32.02	30.79	31.47	31.4267	30.2033	1650	1728	1583.05	1782	1732	1765	1759.67	1653.68	0.0495083	0.482082	0.999443
10426	'TUBGCP3'	mRNA	38.65	34.3	39.02	39.74	36.79	36.81	37.78	37.3233	28.02	25.5	28.65	28.15	26.87	26.91	27.31	27.39	1190	1108	1170	1268	1172	1163	1201	1156	0.0135734	0.862735	0.999443
10427	'SEC24B'	mRNA	11.46	10.45	12.06	11.61	11.78	9.67	11.02	11.3233	8.31	7.77	8.85	8.22	8.61	7.07	7.96667	8.31	558	540	582	575	591	485	550.333	560	-0.066575	0.524806	0.999443
10428	'CFDP1'	mRNA	37.07	41	41.34	42.2	38.38	45.89	42.1567	39.8033	26.88	30.48	30.35	29.89	28.03	33.55	30.49	29.2367	383	468	394	458	432	501	463.667	415	0.120474	0.293492	0.999443
1043	'CD52'	mRNA	3.1	3.78	4.2	6.14	4.74	3.81	4.89667	3.69333	2.25	2.81	3.08	4.35	3.46	2.78	3.53	2.71333	7	9	9	14	11	9	11.3333	8.33333	0.400025	0.503036	0.999443
10430	'TMEM147'	mRNA	116.89	112.64	119.55	116.36	114.12	101.91	110.797	116.36	84.76	83.74	87.78	82.41	83.33	74.5	80.08	85.4267	785	800	780	792	788	711	763.667	788.333	-0.0867022	0.320723	0.999443
10432	'RBM14'	mRNA	18.42	18.46	18.93	20.91	16.76	16.24	17.97	18.6033	13.35	13.73	13.89	14.81	12.24	11.87	12.9733	13.6567	1037.19	1106.57	1058.12	1200.98	971.99	947.65	1040.21	1067.29	-0.0806535	0.375793	0.999443
10434	'LYPLA1'	mRNA	34.97	25.23	32.81	33.67	31.85	28.86	31.46	31.0033	25.36	18.76	24.09	23.85	23.26	21.1	22.7367	22.7367	719	597	711	735	651	643	676.333	675.667	-0.0411261	0.686729	0.999443
10435	'CDC42EP2'	mRNA	18.59	19.33	17.98	20.94	18.34	20.26	19.8467	18.6333	13.48	14.37	13.2	14.83	13.39	14.81	14.3433	13.6833	349	386	334	401	355	395	383.667	356.333	0.0661822	0.561676	0.999443
10436	'EMG1'	mRNA	25.9	23.49	23.63	25.26	22.73	26.14	24.71	24.34	18.78	17.46	17.35	17.89	16.6	19.11	17.8667	17.8633	1319	1273	1195	1313	1194	1381	1296	1262.33	-0.00223103	0.978378	0.999443
10437	'IFI30'	mRNA	758.74	740.08	708.11	751.95	718.24	705.89	725.36	735.643	550.15	550.23	519.9	532.54	524.48	516.02	524.347	540.093	6066	6285	5558	6123	5920	5871	5971.33	5969.67	-0.0396302	0.524595	0.999443
10438	'C1D'	mRNA	8.49	7.22	7.91	8.07	7.63	7.42	7.70667	7.87333	6.16	5.37	5.81	5.72	5.57	5.42	5.57	5.78	186	169	172	181	173	169	174.333	175.667	-0.0519222	0.729784	0.999443
10439	'OLFM1'	mRNA	0.23	0.51	0.51	0.55	0.76	0.44	0.583333	0.416667	0.17	0.38	0.37	0.39	0.56	0.32	0.423333	0.306667	6	11	10	9	18	9	12	9	0.377949	0.528841	0.999443
1044	'CDX1'	mRNA	0	0.06	0	0	0	0	0	0.02	0	0.04	0	0	0	0	0	0.0133333	0	1	0	0	0	0	0	0.333333	-1.0023	0.805965	0.999443
10440	'TIMM17A'	mRNA	53.29	45.87	47.91	52.71	43.76	42.31	46.26	49.0233	38.64	34.11	35.17	37.33	31.95	30.93	33.4033	35.9733	816	747	725	823	691	673	729	762.667	-0.107277	0.263701	0.999443
10443	'N4BP2L2'	mRNA	20.84	18.28	22.23	22.23	19.34	20.18	20.5833	20.45	15.11	13.59	16.32	15.75	14.12	14.75	14.8733	15.0067	456	416	483	494	430	461.01	461.67	451.667	-0.0105794	0.922527	0.999443
10444	'ZER1'	mRNA	30.33	30.84	32.81	36.13	31.74	32.44	33.4367	31.3267	21.99	22.93	24.09	25.59	23.18	23.71	24.16	23.0033	1318	1431	1409	1582	1421	1463	1488.67	1386	0.0616567	0.416153	0.999443
10445	'MCRS1'	mRNA	81.85	87.97	77.01	94.06	93.01	84.62	90.5633	82.2767	59.35	65.4	56.54	66.61	67.92	61.86	65.4633	60.43	1524	1725	1391	1770	1733	1647	1716.67	1546.67	0.110752	0.178223	0.999443
10446	'LRRN2'	mRNA	0.09	0.14	0.09	0.15	0.15	0.14	0.146667	0.106667	0.07	0.1	0.06	0.1	0.11	0.11	0.106667	0.0766667	3	5	3	5	5.91	5	5.30333	3.66667	0.408756	0.645871	0.999443
10447	'FAM3C'	mRNA	19.88	16.06	19.85	17.71	15.2	16.52	16.4767	18.5967	14.41	11.94	14.57	12.54	11.1	12.08	11.9067	13.64	483	415	478	438	380	418	412	458.667	-0.196753	0.0782055	0.999443
10449	'ACAA2'	mRNA	67.54	60.09	63.21	67.1	62.3	63.2	64.2	63.6133	48.97	44.68	46.41	47.52	45.49	46.2	46.4033	46.6867	1987	1881	1844	2014.02	1890.05	1930	1944.69	1904	-0.0103039	0.881529	0.999443
1045	'CDX2'	mRNA	1.99	2.32	1.99	2.77	1.98	2.52	2.42333	2.1	1.44	1.73	1.46	1.96	1.45	1.84	1.75	1.54333	70	87	61	86	72	86	81.3333	72.6667	0.122775	0.587846	0.999443
10450	'PPIE'	mRNA	103.88	99.13	91.38	100.41	100.38	96.66	99.15	98.13	75.32	73.7	67.09	71.11	73.3	70.66	71.69	72.0367	1308	1335	1147	1333	1337	1278	1316	1263.33	0.019211	0.810584	0.999443
10451	'VAV3'	mRNA	8.35	7.7	9.11	10.34	9.96	8.66	9.65333	8.38667	6.05	5.73	6.69	7.32	7.27	6.33	6.97333	6.15667	269	259	285	333	323	283	313	271	0.166117	0.186071	0.999443
10452	'TOMM40'	mRNA	129.56	140.71	120.75	134.22	125.71	129.84	129.923	130.34	93.94	104.61	88.66	95.06	91.8	94.92	93.9267	95.7367	2061	2374	1901	2172	2064	2148	2128	2112	-0.0285766	0.723245	0.999443
10454	'TAB1'	mRNA	22.23	24.42	21.02	22.37	24.11	24.64	23.7067	22.5567	16.12	18.16	15.43	15.84	17.6	18.01	17.15	16.57	712	841	669	737	798	825	786.667	740.667	0.0487423	0.631432	0.999443
10455	'ECI2'	mRNA	91.6	84	78.27	92.68	83.57	89.87	88.7067	84.6233	66.41	62.46	57.47	65.64	61.02	65.7	64.12	62.1133	1145	1116	965	1181	1079	1169	1143	1075.33	0.0479774	0.574511	0.999443
10456	'HAX1'	mRNA	239.54	245.56	228.41	238.27	256.16	242.62	245.683	237.837	173.69	182.57	167.7	168.74	187.05	177.36	177.717	174.653	2216	2402	2062	2236	2429	2316	2327	2226.67	0.0248104	0.746968	0.999443
10457	'GPNMB'	mRNA	6.15	5.8	6.11	7.69	6.17	6.3	6.72	6.02	4.46	4.31	4.49	5.44	4.5	4.61	4.85	4.42	163	163	160	207	168	173	182.667	162	0.131089	0.394302	0.999443
10458	'BAIAP2'	mRNA	52.38	58.13	50.56	55.89	54.69	54.78	55.12	53.69	37.98	43.22	37.12	39.58	39.93	40.04	39.85	39.44	1167	1336	1088	1304	1212	1197	1237.67	1197	0.00802158	0.925089	0.999443
10459	'MAD2L2'	mRNA	224.32	224.21	190.94	199.91	215.45	216.99	210.783	213.157	162.65	166.7	140.19	141.58	157.33	158.62	152.51	156.513	1959	2083	1640	1778	1939	1969	1895.33	1894	-0.0367692	0.682288	0.999443
10460	'TACC3'	mRNA	84.95	92.81	82.27	88.3	87.91	90.47	88.8933	86.6767	61.6	69	60.4	62.54	64.19	66.13	64.2867	63.6667	2352	2761	2257	2520	2505	2623	2549.33	2456.67	0.0143963	0.856869	0.999443
10461	'MERTK'	mRNA	0.1	0.05	0.15	0.05	0.07	0.07	0.0633333	0.1	0.07	0.04	0.11	0.04	0.05	0.05	0.0466667	0.0733333	4	2	6	2	3	3	2.66667	4	-0.627009	0.542041	0.999443
10463	'SLC30A9'	mRNA	16.55	14.17	13.83	17.69	14.95	15.79	16.1433	14.85	12	10.53	10.16	12.53	10.91	11.54	11.66	10.8967	596	542	551	603	565	577	581.667	563	0.00611663	0.949105	0.999443
10464	'PIBF1'	mRNA	11.54	12.77	12.08	12.88	12.6	11.67	12.3833	12.13	8.37	9.49	8.87	9.12	9.2	8.53	8.95	8.91	339	412	360	386	382	364	377.333	370.333	-0.0132108	0.908771	0.999443
10465	'PPIH'	mRNA	86.77	80.88	91.44	78.52	80.62	81.25	80.13	86.3633	62.91	60.13	67.13	55.61	58.87	59.39	57.9567	63.39	514	506	536	474	490	504	489.333	518.667	-0.124274	0.219985	0.999443
10466	'COG5'	mRNA	13.14	9.4	13.4	12.8	12.35	11.23	12.1267	11.98	9.53	6.99	9.84	9.07	9.02	8.21	8.76667	8.78667	576	462	570	560	537	504	533.667	536	-0.0483697	0.661551	0.999443
10467	'ZNHIT1'	mRNA	213.18	230.69	208.69	227.24	246.22	246.18	239.88	217.52	154.57	171.51	153.22	160.94	179.8	179.96	173.567	159.767	1099	1260	1048	1192	1311	1316	1273	1135.67	0.126381	0.160415	0.999443
10468	'FST'	mRNA	1.67	2.26	1.21	1.52	2.55	2.27	2.11333	1.71333	1.21	1.68	0.89	1.08	1.86	1.66	1.53333	1.26	40	44	27	32	49	44	41.6667	37	0.136065	0.670757	0.999443
10469	'TIMM44'	mRNA	41.32	50.82	40.56	46.37	50.47	46.41	47.75	44.2333	29.96	37.79	29.78	32.84	36.85	33.93	34.54	32.51	721	943	700	825	908	841	858	788	0.0846366	0.437025	0.999443
1047	'CLGN'	mRNA	0	0.07	0.11	0.04	0.07	0.14	0.0833333	0.06	0	0.05	0.08	0.03	0.05	0.1	0.06	0.0433333	0	2	3	1	2	4	2.33333	1.66667	0.4487	0.743535	0.999443
10471	'PFDN6'	mRNA	328.2	354.34	328.67	337.16	321.74	343.28	334.06	337.07	237.97	263.44	241.31	238.78	234.95	250.94	241.557	247.573	1241	1402	1203	1296	1255	1337	1296	1282	-0.023937	0.768993	0.999443
10472	'ZBTB18'	mRNA	1.39	1.66	1.59	1.71	1.6	1.43	1.58	1.54667	1.01	1.24	1.17	1.21	1.17	1.05	1.14333	1.14	59	72	63	71	70	60	67	64.6667	0.0103977	0.965022	0.999443
10473	'HMGN4'	mRNA	66.41	57.66	63.25	63.19	63.61	60.13	62.31	62.44	48.15	42.87	46.44	44.75	46.45	43.96	45.0533	45.82	1236	1140	1164	1198	1219	1162	1193	1180	-0.0246709	0.75395	0.999443
10474	'TADA3'	mRNA	88.35	95.74	86.01	96.59	94.29	94.73	95.2033	90.0333	64.06	71.18	63.15	68.4	68.85	69.25	68.8333	66.13	1980	2321.93	1934	2228	2219.08	2230	2225.69	2078.64	0.0594188	0.44651	0.999443
10475	'TRIM38'	mRNA	12.52	12.11	11.54	13.15	11.77	12.52	12.48	12.0567	9.08	9	8.47	9.31	8.6	9.15	9.02	8.85	469	466	442	527.73	458	473	486.243	459	0.0411029	0.687665	0.999443
10476	'ATP5PD'	mRNA	824.69	776.14	785.79	882.62	845.04	811.23	846.297	795.54	597.97	577.04	576.93	625.08	617.07	593.02	611.723	583.98	3135	3129	2892	3410	3312	3220	3314	3052	0.0784548	0.219048	0.999443
10477	'UBE2E3'	mRNA	51.04	54.05	57.92	62.9	64.67	61.7	63.09	54.3367	37.01	40.19	42.53	44.55	47.23	45.1	45.6267	39.91	691	711	773	810	805	728	781	725	0.0658492	0.478028	0.999443
10478	'SLC25A17'	mRNA	20.65	16.85	20.06	20.62	18.43	17.65	18.9	19.1867	14.97	12.53	14.73	14.6	13.46	12.9	13.6533	14.0767	446	388	430	457	409	396	420.667	421.333	-0.0443377	0.689015	0.999443
10479	'SLC9A6'	mRNA	3.65	2.83	4.39	3.57	3.92	3.05	3.51333	3.62333	2.65	2.1	3.22	2.52	2.86	2.23	2.53667	2.65667	175	145	207	178	194	153	175	175.667	-0.047826	0.779169	0.999443
10480	'EIF3M'	mRNA	227.85	198.82	237.08	226.87	224.15	215.99	222.337	221.25	165.21	147.82	174.07	160.68	163.68	157.9	160.753	162.367	3222	2993	3315	3257	3238	3189	3228	3176.67	-0.0179744	0.796053	0.999443
10481	'HOXB13'	mRNA	7.3	7.75	7.1	8.12	7.68	7.16	7.65333	7.38333	5.3	5.76	5.21	5.75	5.61	5.24	5.53333	5.42333	224	253	216	254	243	228	241.667	231	0.0246649	0.854424	0.999443
10482	'NXF1'	mRNA	46.81	46.39	45.32	49.87	44.82	44.55	46.4133	46.1733	33.94	34.49	33.27	35.32	32.73	32.56	33.5367	33.9	1213	1279	1154	1288	1176	1198	1220.67	1215.33	-0.0344225	0.655048	0.999443
10483	'SEC23B'	mRNA	32.81	27.74	29.78	31.72	29.5	31.52	30.9133	30.11	23.79	20.63	21.87	22.46	21.54	23.04	22.3467	22.0967	1010	909	910	997	937	1008	980.667	943	0.0159522	0.850954	0.999443
10484	'SEC23A'	mRNA	24.86	20.24	27.25	25.47	21.73	21.54	22.9133	24.1167	18.03	15.05	20.01	18.04	15.86	15.74	16.5467	17.6967	780	664	851	799	698	681	726	765	-0.118844	0.26353	0.999443
10485	'MIR9-1HG'	mRNA	0.18	0	0.25	0	0.26	0.09	0.116667	0.143333	0.13	0	0.18	0	0.19	0.06	0.0833333	0.103333	2	0	2	0	3	1	1.33333	1.33333	-0.0331923	0.98443	0.999443
10486	'CAP2'	mRNA	11.49	10.48	10.38	13	11.66	10.81	11.8233	10.7833	8.33	7.79	7.62	9.21	8.52	7.9	8.54333	7.91333	338	327	302	389	353	330	357.333	322.333	0.107479	0.358517	0.999443
10487	'CAP1'	mRNA	171.83	155.9	165.41	188.9	167.26	162.36	172.84	164.38	124.59	115.91	121.45	133.78	122.14	118.69	124.87	120.65	4664	4518	4477	5230	4681	4571	4827.33	4553	0.0426347	0.506493	0.999443
10488	'CREB3'	mRNA	45.99	45.82	43.9	45.83	45.46	41.3	44.1967	45.2367	33.35	34.06	32.23	32.46	33.2	30.19	31.95	33.2133	626	663	590	636	638	584	619.333	626.333	-0.0564451	0.549469	0.999443
10489	'LRRC41'	mRNA	33.04	34.16	33.83	34.76	34.39	33.71	34.2867	33.6767	23.95	25.4	24.83	24.62	25.11	24.65	24.7933	24.7267	980	1078	995	1052	1052	1038	1047.33	1017.67	0.00134035	0.986718	0.999443
10490	'VTI1B'	mRNA	13.58	12.06	13.44	14.21	14.06	13.68	13.9833	13.0267	9.84	8.97	9.87	10.06	10.27	10	10.11	9.56	732	692	720	782	782	765	776.333	714.667	0.0787338	0.367926	0.999443
104909134	'LINC02210-CRHR1'	mRNA	0.85	0.93	1.43	0.89	1.01	1.08	0.993333	1.07	0.61	0.69	1.05	0.63	0.74	0.79	0.72	0.783333	22	26	38	24	28	30	27.3333	28.6667	-0.109781	0.766073	0.999443
10491	'CRTAP'	mRNA	71.07	63.09	72.23	72.73	70.34	69.55	70.8733	68.7967	51.53	46.91	53.03	51.51	51.37	50.84	51.24	50.49	4974	4699	5023	5195	5077	5049	5107	4898.67	0.0190423	0.762554	0.999443
10492	'SYNCRIP'	mRNA	85.2	69.46	87.17	90.23	72.09	72.47	78.2633	80.61	61.77	51.64	64	63.9	52.64	52.98	56.5067	59.1367	3056	2607	3135	3252	2686	2698	2878.67	2932.67	-0.070592	0.425985	0.999443
10493	'VAT1'	mRNA	112.59	113.38	104.66	108.51	106.8	103.53	106.28	110.21	81.64	84.3	76.85	76.85	77.99	75.68	76.84	80.93	3030	3246	2792	2979	2964	2892	2945	3022.67	-0.0772221	0.265512	0.999443
10494	'STK25'	mRNA	66.83	69.82	60.7	69.48	67.28	67.29	68.0167	65.7833	48.46	51.91	44.57	49.21	49.13	49.19	49.1767	48.3133	1440	1602	1282	1521	1502	1515	1512.67	1441.33	0.030478	0.716063	0.999443
10495	'ENOX2'	mRNA	3.05	2.74	2.8	3.72	2.97	2.63	3.10667	2.86333	2.21	2.04	2.06	2.63	2.17	1.92	2.24	2.10333	124	117	110	147	129	109	128.333	117	0.091387	0.615232	0.999443
10497	'UNC13B'	mRNA	14.64	12.96	12.44	15.4	14.04	13.6	14.3467	13.3467	10.62	9.64	9.13	10.9	10.25	9.94	10.3633	9.79667	986	929	833	1058	976	950	994.667	916	0.0781461	0.368558	0.999443
10498	'CARM1'	mRNA	41.11	46.34	43.12	45.28	46.62	43.16	45.02	43.5233	29.81	34.45	31.66	32.07	34.04	31.55	32.5533	31.9733	1350	1619	1408	1521	1581	1475	1525.67	1459	0.0248209	0.766289	0.999443
10499	'NCOA2'	mRNA	3.41	2.37	2.99	3.52	3.19	2.87	3.19333	2.92333	2.47	1.76	2.19	2.49	2.33	2.1	2.30667	2.14	269	227	269	323	299	269	297	255	0.177632	0.179578	0.999443
1050	'CEBPA'	mRNA	62.22	62.49	57.82	64.33	62.02	63.3	63.2167	60.8433	45.11	46.46	42.45	45.56	45.29	46.27	45.7067	44.6733	1607	1717	1480	1696	1652	1698	1682	1601.33	0.031209	0.678155	0.999443
10500	'SEMA6C'	mRNA	0.56	0.65	0.45	0.44	0.6	0.56	0.533333	0.553333	0.41	0.48	0.33	0.31	0.44	0.41	0.386667	0.406667	23	25	19	20	26	21	22.3333	22.3333	-0.0380642	0.923909	0.999443
10501	'SEMA6B'	mRNA	15.23	16.62	14.84	14.03	15.76	14.94	14.91	15.5633	11.04	12.36	10.89	9.94	11.51	10.92	10.79	11.43	601	694	570	562	642	608	604	621.667	-0.0799183	0.446043	0.999443
10505	'SEMA4F'	mRNA	3.54	2.74	3.29	3.56	3.35	3.18	3.36333	3.19	2.56	2.03	2.41	2.52	2.45	2.33	2.43333	2.33333	137.71	115.56	141.69	145	123.44	133.98	134.14	131.653	-0.013289	0.939622	0.999443
10507	'SEMA4D'	mRNA	3.46	3.3	4.23	4.16	4.24	3.97	4.12333	3.66333	2.51	2.46	3.11	2.95	3.09	2.9	2.98	2.69333	179.84	178.98	208.92	217.53	227.31	211.93	218.923	189.247	0.172134	0.237337	0.999443
10509	'SEMA4B'	mRNA	30.66	33.31	31.41	29.4	29.49	32.09	30.3267	31.7933	22.23	24.76	23.06	20.82	21.53	23.46	21.9367	23.35	1202	1387	1215	1179	1194	1303	1225.33	1268	-0.0884928	0.304621	0.999443
1051	'CEBPB'	mRNA	189.13	202.22	170.94	181.8	207.54	206.97	198.77	187.43	137.13	150.34	125.51	128.75	151.55	151.3	143.867	137.66	3325	3789	2979	3264	3765	3794	3607.67	3364.33	0.0636654	0.484171	0.999443
10512	'SEMA3C'	mRNA	10.25	8.16	10.95	11.27	9.85	9.22	10.1133	9.78667	7.43	6.07	8.04	7.98	7.19	6.74	7.30333	7.18	531	449	563	596	527	495	539.333	514.333	0.0253319	0.822546	0.999443
10513	'APPBP2'	mRNA	3.01	2.33	4.02	3.6	2.93	3.18	3.23667	3.12	2.18	1.74	2.95	2.55	2.14	2.32	2.33667	2.29	207	171	275	253	208	227	229.333	217.667	0.0307853	0.854002	0.999443
10514	'MYBBP1A'	mRNA	29.15	32.18	26.89	32.33	30.17	29.64	30.7133	29.4067	21.14	23.93	19.74	22.9	22.03	21.67	22.2	21.6033	1335	1578	1233	1497	1403	1401	1433.67	1382	0.0131783	0.880794	0.999443
10516	'FBLN5'	mRNA	1.75	2.21	2.04	2.16	2.26	1.98	2.13333	2	1.27	1.64	1.5	1.53	1.65	1.45	1.54333	1.47	46	62	53	58	61	54	57.6667	53.6667	0.0636755	0.80519	0.999443
10517	'FBXW10'	mRNA	0.02	0	0	0	0	0	0	0.00666667	0.01	0	0	0	0	0	0	0.00333333	0.53	0	0	0	0	0	0	0.176667
10518	'CIB2'	mRNA	4.95	4.3	4.36	3.5	4.82	5.06	4.46	4.53667	3.59	3.2	3.2	2.48	3.52	3.7	3.23333	3.33	67	62	58	49	65	72	62	62.3333	-0.0451385	0.857775	0.999443
10519	'CIB1'	mRNA	236.72	248.59	219.36	225.22	214.68	240.08	226.66	234.89	171.64	184.82	161.06	159.51	156.76	175.5	163.923	172.507	2271	2518	2052	2196	2129	2389	2238	2280.33	-0.0658665	0.426964	0.999443
1052	'CEBPD'	mRNA	41.69	46.9	37.85	47.02	48.7	48.13	47.95	42.1467	30.23	34.87	27.79	33.3	35.56	35.19	34.6833	30.9633	455	544	407	523	548	546	539	468.667	0.163223	0.148471	0.999443
10520	'ZNF211'	mRNA	2.36	2.49	2.01	2.71	2.32	2.75	2.59333	2.28667	1.71	1.85	1.48	1.92	1.7	2.01	1.87667	1.68	91	103	78	109	93	110	104	90.6667	0.157993	0.432628	0.999443
10521	'DDX17'	mRNA	52.62	45.22	54.77	59.3	52.51	50.59	54.1333	50.87	38.16	33.62	40.21	41.99	38.34	36.98	39.1033	37.33	2617	2393	2705	3009	2693	2610	2770.67	2571.67	0.0649336	0.395546	0.999443
10522	'DEAF1'	mRNA	41.94	45.59	34.09	38.96	36.16	43.34	39.4867	40.54	30.41	33.9	25.03	27.6	26.41	31.68	28.5633	29.78	910	1052	738	870	810	976	885.333	900	-0.0617686	0.58565	0.999443
10523	'CHERP'	mRNA	36.54	38.44	36.9	37.81	38.79	38.23	38.2767	37.2933	26.49	28.58	27.09	26.77	28.32	27.95	27.68	27.3867	1539	1723	1543	1625	1685	1671	1660.33	1601.67	0.0124302	0.870626	0.999443
10524	'KAT5'	mRNA	48.35	52.03	47.66	56.06	57.3	56.74	56.7	49.3467	35.06	38.68	35	39.7	41.84	41.48	41.0067	36.2467	893	1016	863	1041	1078	1079	1066	924	0.167049	0.0548699	0.999443
10525	'HYOU1'	mRNA	46.96	47.35	48.64	49.79	48.52	47.52	48.61	47.65	34.05	35.2	35.71	35.26	35.43	34.74	35.1433	34.9867	2192	2351	2258	2374	2332	2297	2334.33	2267	0.00172578	0.979359	0.999443
10526	'IPO8'	mRNA	20.33	16.87	20.21	21.81	19.15	18.92	19.96	19.1367	14.74	12.54	14.84	15.44	13.99	13.83	14.42	14.04	1111	981	1096	1214	1079	1073	1122	1062.67	0.0361452	0.674567	0.999443
10527	'IPO7'	mRNA	71.84	56.37	77.69	73.07	69.13	63.95	68.7167	68.6333	52.09	41.91	57.04	51.75	50.48	46.75	49.66	50.3467	4684	3911	5033	4862	4648	4325	4611.67	4542.67	-0.0211084	0.812269	0.999443
10528	'NOP56'	mRNA	102.68	98.87	90.59	108.7	96.7	100.94	102.113	97.38	74.45	73.51	66.51	76.99	70.61	73.79	73.7967	71.49	1871	1916	1633	2020	1817	1910	1915.67	1806.67	0.0441608	0.564591	0.999443
10529	'NEBL'	mRNA	1.13	0.9	1.03	0.75	0.78	0.79	0.773333	1.02	0.82	0.67	0.75	0.53	0.57	0.58	0.56	0.746667	89	74	80	66	66	67	66.3333	81	-0.328783	0.142641	0.999443
1053	'CEBPE'	mRNA	0.07	0.2	0.14	0.28	0.21	0.07	0.186667	0.136667	0.05	0.15	0.1	0.2	0.15	0.05	0.133333	0.1	1	3	2	4	3	1	2.66667	2	0.369619	0.764054	0.999443
10531	'PITRM1'	mRNA	22.37	21.09	20.78	23.37	22.51	22.06	22.6467	21.4133	16.22	15.68	15.26	16.55	16.44	16.13	16.3733	15.72	780	785	721	835	814	799	816	762	0.058473	0.49331	0.999443
10533	'ATG7'	mRNA	12.38	11.4	12.24	12.63	11.67	10.91	11.7367	12.0067	8.98	8.48	8.99	8.94	8.52	7.98	8.48	8.81667	342	345	334	378	344	327	349.667	340.333	-0.00235876	0.983522	0.999443
10534	'ZNRD2'	mRNA	114.98	135.73	108.65	113.47	116.36	116.4	115.41	119.787	83.37	100.91	79.77	80.36	84.97	85.09	83.4733	88.0167	654	816	601	654	679	686	673	690.333	-0.0750202	0.490517	0.999443
10535	'RNASEH2A'	mRNA	222.84	244.52	199.23	227.97	215.88	228.74	224.197	222.197	161.58	181.79	146.28	161.45	157.64	167.21	162.1	163.217	2217	2583	1950	2310	2213	2364	2295.67	2250	-0.00982128	0.911253	0.999443
10536	'P3H3'	mRNA	0.57	0.75	0.35	0.34	0.7	0.41	0.483333	0.556667	0.42	0.56	0.25	0.24	0.51	0.3	0.35	0.41	15	21	9	9	19	11	13	15	-0.239482	0.65271	0.999443
105369189	'LOC105369189'	mRNA	0.09	0.25	0.31	0.21	0.04	0.17	0.14	0.216667	0.06	0.18	0.23	0.15	0.03	0.12	0.1	0.156667	2	6	7	5	1	4	3.33333	5	-0.633099	0.508213	0.999443
105369214	'LOC105369214'	mRNA	0.05	0	0	0	0	0	0	0.0166667	0.04	0	0	0	0	0	0	0.0133333	1	0	0	0	0	0	0	0.333333	-1.0023	0.805965	0.999443
105369246	'LOC105369246'	mRNA	0	0	0	0.04	0	0	0.0133333	0	0	0	0	0.03	0	0	0.01	0	0	0	0	1	0	0	0.333333	0	0.92125	0.82138	0.999443
105369669	'LOC105369669'	mRNA	0.79	0.75	0.81	1.43	0.38	0.25	0.686667	0.783333	0.57	0.55	0.59	1.01	0.28	0.19	0.493333	0.57	6	6	6	11	3	2	5.33333	6	-0.223582	0.787232	0.999443
10537	'UBD'	mRNA	0	0	0	0	0	0.28	0.0933333	0	0	0	0	0	0	0.2	0.0666667	0	0	0	0	0	0	2	0.666667	0	1.83302	0.598899	0.999443
105370579	'LOC105370579'	mRNA	0.08	0.29	0.14	0.14	0.21	0.08	0.143333	0.17	0.06	0.21	0.1	0.1	0.16	0.06	0.106667	0.123333	3	11	5	5	8	3	5.33333	6.33333	-0.284215	0.726	0.999443
105370705	'LOC105370705'	mRNA	0	0.28	0	0.29	0.14	0.14	0.19	0.0933333	0	0.21	0	0.2	0.1	0.1	0.133333	0.07	0	2	0	2	1	1	1.33333	0.666667	0.961945	0.624663	0.999443
105370733	'LOC105370733'	mRNA	0	0	0.07	0	0	0.07	0.0233333	0.0233333	0	0	0.05	0	0	0.05	0.0166667	0.0166667	0	0	1	0	0	1	0.333333	0.333333	-0.0405184	0.990051	0.999443
105370849	'LOC105370849'	mRNA	0	0.01	0	0	0	0.01	0.00333333	0.00333333	0	0.01	0	0	0	0.01	0.00333333	0.00333333	0	1	0	0	0	1	0.333333	0.333333	-0.0405185	0.990099	0.999443
105371095	'LOC105371095'	mRNA	0.26	0	0	0	0	0	0	0.0866667	0.19	0	0	0	0	0	0	0.0633333	2	0	0	0	0	0	0	0.666667	-1.89447	0.585096	0.999443
105371191	'LOC105371191'	mRNA	0	0.14	0	0	0	0	0	0.0466667	0	0.1	0	0	0	0	0	0.0333333	0	1.88	0	0	0	0	0	0.626667	-1.0023	0.805965	0.999443
105371371	'LOC105371371'	mRNA	0.42	0.2	0	0	0	0	0	0.206667	0.31	0.15	0	0	0	0	0	0.153333	2	1	0	0	0	0	0	1	-2.47613	0.366748	0.999443
105371409	'LOC105371409'	mRNA	2.47	2.25	2.13	3.42	3.52	2.31	3.08333	2.28333	1.79	1.68	1.57	2.42	2.57	1.69	2.22667	1.68	34	33	29	48	50	33	43.6667	32	0.407348	0.197347	0.999443
105371419	'LOC105371419'	mRNA	0.05	0.05	0.02	0.07	0.02	0.07	0.0533333	0.04	0.03	0.03	0.02	0.05	0.02	0.05	0.04	0.0266667	2	2	1	3	1	3	2.33333	1.66667	0.443723	0.735538	0.999443
105371932	'LOC105371932'	mRNA	0.9	0.47	0.41	1.08	0.77	0.67	0.84	0.593333	0.65	0.35	0.3	0.76	0.57	0.49	0.606667	0.433333	9	5	4	11	8	7	8.66667	6	0.487892	0.487308	0.999443
105372269	'LOC105372269'	mRNA	0.08	0	0.12	0.08	0.05	0.07	0.0666667	0.0666667	0.06	0	0.09	0.05	0.03	0.05	0.0433333	0.05	2	0	3	2	1.28	2	1.76	1.66667	-0.0499853	0.972865	0.999443
105372412	'LOC105372412'	mRNA	0.53	0.54	0.41	0.49	0.25	0.65	0.463333	0.493333	0.38	0.4	0.3	0.35	0.18	0.48	0.336667	0.36	11	12	8	10	5	14	9.66667	10.3333	-0.13552	0.823958	0.999443
105372478	'LOC105372478'	mRNA	0	0	0	0.07	0	0	0.0233333	0	0	0	0	0.05	0	0	0.0166667	0	0	0	0	1	0	0	0.333333	0	0.92125	0.82138	0.999443
105372704	'LOC105372704'	mRNA	0.32	0.42	0.19	0.06	0.37	0.19	0.206667	0.31	0.23	0.31	0.14	0.04	0.27	0.14	0.15	0.226667	5	7	3	1	6	3	3.33333	5	-0.613903	0.518364	0.999443
105372824	'LOC105372824'	mRNA	2.28	1.74	3.31	2.34	2.11	2.71	2.38667	2.44333	1.65	1.29	2.43	1.66	1.54	1.98	1.72667	1.79	21	17	30	22	20	26	22.6667	22.6667	-0.0426167	0.91641	0.999443
105372836	'LOC105372836'	mRNA	0	0	0	0.14	0	0.13	0.09	0	0	0	0	0.1	0	0.1	0.0666667	0	0	0	0	1	0	1	0.666667	0	1.80924	0.576566	0.999443
105372883	'LINC02767'	mRNA	0	0	0	0	0.03	0	0.01	0	0	0	0	0	0.02	0	0.00666667	0	0	0	0	0	1	0	0.333333	0	0.92125	0.82138	0.999443
105373057	'LOC105373057'	mRNA	0	0	0	0.04	0	0	0.0133333	0	0	0	0	0.03	0	0	0.01	0	0	0	0	1	0	0	0.333333	0	0.92125	0.82138	0.999443
105373102	'LOC105373102'	mRNA	0.42	0.24	0.17	0.58	0.16	0.24	0.326667	0.276667	0.3	0.18	0.12	0.41	0.12	0.18	0.236667	0.2	5	3	2	7	2	3	4	3.33333	0.214946	0.829131	0.999443
105373244	'LOC105373244'	mRNA	0.03	0	0	0	0.09	0.12	0.07	0.01	0.02	0	0	0	0.07	0.09	0.0533333	0.00666667	1	0	0	0	3	4	2.33333	0.333333	2.67805	0.163945	0.999443
105373289	'LOC105373289'	mRNA	0.33	0.31	0.11	0.27	0.22	0.32	0.27	0.25	0.24	0.23	0.08	0.19	0.16	0.23	0.193333	0.183333	6	6	2	5	4	6	5	4.66667	0.0627998	0.941535	0.999443
105373314	'LOC105373314'	mRNA	0	0.09	0.09	0	0.09	0	0.03	0.06	0	0.06	0.07	0	0.06	0	0.02	0.0433333	0	1	1	0	1	0	0.333333	0.666667	-0.938064	0.72349	0.999443
105373347	'LOC105373347'	mRNA	0.24	0.4	0.38	0.25	0.4	0.41	0.353333	0.34	0.17	0.3	0.28	0.18	0.29	0.3	0.256667	0.25	3	5	4	3	5	5	4.33333	4	0.0793066	0.930218	0.999443
105373780	'LOC105373780'	mRNA	0.06	0.11	0.06	0.17	0.14	0.14	0.15	0.0766667	0.04	0.08	0.04	0.12	0.1	0.1	0.106667	0.0533333	2	4	2	6	5	5	5.33333	2.66667	0.960105	0.311881	0.999443
105373944	'LOC105373944'	mRNA	0.25	0.14	0.05	0.24	0.1	0.28	0.206667	0.146667	0.18	0.1	0.04	0.17	0.07	0.21	0.15	0.106667	5	3	1	5	2	6	4.33333	3	0.49134	0.625995	0.999443
105373989	'LOC105373989'	mRNA	0.09	0.08	0	0.43	0.26	0.08	0.256667	0.0566667	0.06	0.06	0	0.31	0.19	0.06	0.186667	0.04	1	1	0	5	3	1	3	0.666667	2.12417	0.179917	0.999443
105374013	'LOC105374013'	mRNA	3.13	2.05	2.94	3.36	2.56	2.81	2.91	2.70667	2.27	1.52	2.16	2.38	1.87	2.06	2.10333	1.98333	129.29	90.01	120.5	141.39	109.17	120.53	123.697	113.267	0.0828442	0.670282	0.999443
105374103	'LOC105374103'	mRNA	0.04	0	0	0.02	0	0	0.00666667	0.0133333	0.03	0	0	0.01	0	0	0.00333333	0.01	2	0	0	1	0	0	0.333333	0.666667	-0.933118	0.741968	0.999443
105374299	'LOC105374299'	mRNA	0	0	0	0	0.04	0	0.0133333	0	0	0	0	0	0.03	0	0.01	0	0	0	0	0	1	0	0.333333	0	0.92125	0.82138	0.999443
105374301	'LOC105374301'	mRNA	0.39	0.38	0.46	0.51	0.48	0.44	0.476667	0.41	0.28	0.29	0.34	0.36	0.35	0.32	0.343333	0.303333	24	25	28	32	30	28	30	25.6667	0.18326	0.605642	0.999443
105374811	'LOC105374811'	mRNA	0.19	0.18	0.26	0.25	0.06	0.06	0.123333	0.21	0.14	0.13	0.19	0.18	0.04	0.04	0.0866667	0.153333	3	3	4	4	1	1	2	3.33333	-0.789516	0.497303	0.999443
105375112	'LOC105375112'	mRNA	0	0	0	0	0.03	0	0.01	0	0	0	0	0	0.02	0	0.00666667	0	0	0	0	0	1	0	0.333333	0	0.92125	0.82138	0.999443
105375116	'LOC105375116'	mRNA	0	0	0	0	0	0.03	0.01	0	0	0	0	0	0	0.02	0.00666667	0	0	0	0	0	0	1	0.333333	0	0.92125	0.82138	0.999443
105375355	'UPK3B'	mRNA	9.14	9.62	8.7	9.27	7.9	7.93	8.36667	9.15333	6.63	7.15	6.39	6.57	5.77	5.8	6.04667	6.72333	131	148	119	136	117	120	124.333	132.667	-0.134323	0.444453	0.999443
105376204	'LOC105376204'	mRNA	0	0.01	0	0	0	0	0	0.00333333	0	0.01	0	0	0	0	0	0.00333333	0	1	0	0	0	0	0	0.333333	-1.0023	0.805965	0.999443
105376526	'LOC105376526'	mRNA	0	0	0	0.02	0	0	0.00666667	0	0	0	0	0.02	0	0	0.00666667	0	0	0	0	1	0	0	0.333333	0	0.92125	0.82138	0.999443
105376678	'LOC105376678'	mRNA	0.26	0.87	0.27	0.39	0.76	0.38	0.51	0.466667	0.19	0.64	0.2	0.27	0.56	0.28	0.37	0.343333	2	7	2	3	6	3	4	3.66667	0.0931737	0.924318	0.999443
105376714	'LOC105376714'	mRNA	0.13	0.12	0	0.12	0.12	0	0.08	0.0833333	0.09	0.09	0	0.09	0.09	0	0.06	0.06	1	1	0	1	1	0	0.666667	0.666667	-0.0395888	0.986256	0.999443
105376722	'LOC105376722'	mRNA	0	0	0.12	0.06	0	0	0.02	0.04	0	0	0.09	0.04	0	0	0.0133333	0.03	0	0	2	1	0	0	0.333333	0.666667	-0.952505	0.735734	0.999443
105376791	'LOC105376791'	mRNA	0.05	0	0	0	0	0	0	0.0166667	0.04	0	0	0	0	0	0	0.0133333	1	0	0	0	0	0	0	0.333333	-1.0023	0.805965	0.999443
105377022	'LOC105377022'	mRNA	0	0.05	0	0	0	0.05	0.0166667	0.0166667	0	0.03	0	0	0	0.03	0.01	0.01	0	1	0	0	0	1	0.333333	0.333333	-0.0405185	0.990099	0.999443
105377310	'LOC105377310'	mRNA	0.07	0.07	0	0.07	0	0	0.0233333	0.0466667	0.05	0.05	0	0.05	0	0	0.0166667	0.0333333	1	1	0	1	0	0	0.333333	0.666667	-0.928828	0.727678	0.999443
105377622	'LOC105377622'	mRNA	0.48	0.48	0.18	0.38	0.52	0.43	0.443333	0.38	0.35	0.36	0.13	0.27	0.38	0.32	0.323333	0.28	16	17	6	13	18	15	15.3333	13	0.203518	0.697239	0.999443
105377650	'LOC105377650'	mRNA	0	0.04	0.04	0	0.04	0	0.0133333	0.0266667	0	0.03	0.03	0	0.03	0	0.01	0.02	0	1	1	0	1	0	0.333333	0.666667	-0.938064	0.72349	0.999443
105377805	'LOC105377805'	mRNA	0.04	0	0	0.02	0.04	0.07	0.0433333	0.0133333	0.03	0	0	0.02	0.03	0.05	0.0333333	0.01	2	0	0	1	2	3	2	0.666667	1.55366	0.381093	0.999443
105378220	'MARCOL'	mRNA	40.75	32.17	38.12	44.28	38.11	35.79	39.3933	37.0133	29.55	23.91	27.99	31.36	27.83	26.16	28.45	27.15	447	375	412	495	431	408	444.667	411.333	0.0700221	0.53947	0.999443
105378260	'LOC105378260'	mRNA	0	0	0.24	0.2	0	0	0.0666667	0.08	0	0	0.18	0.14	0	0	0.0466667	0.06	0	0	3.11	2.72	0	0	0.906667	1.03667	-0.666978	0.775824	0.999443
105378862	'LOC105378862'	mRNA	0.08	0.23	0.08	0.31	0	0.08	0.13	0.13	0.06	0.17	0.06	0.22	0	0.06	0.0933333	0.0966667	1	3	1	4	0	1	1.66667	1.66667	-0.0537406	0.971707	0.999443
105378947	'LOC105378947'	mRNA	0.12	0	0	0	0	0.2	0.0666667	0.04	0.09	0	0	0	0	0.14	0.0466667	0.03	2.81	0	0	0	0	4.67	1.55667	0.936667	0.976895	0.657382	0.999443
105378949	'LOC105378949'	mRNA	0.24	0.87	0.73	0.33	0.78	0.49	0.533333	0.613333	0.17	0.64	0.54	0.23	0.57	0.36	0.386667	0.45	2	9	6	3	7	5	5	5.66667	-0.214825	0.798348	0.999443
105378952	'KLF18'	mRNA	0	0	0	0.03	0	0.06	0.03	0	0	0	0	0.02	0	0.04	0.02	0	0	0	0	1	0	2	1	0	2.40198	0.384892	0.999443
105379282	'LOC105379282'	mRNA	0.17	0.08	0.21	0.22	0.08	0.28	0.193333	0.153333	0.12	0.06	0.15	0.15	0.06	0.2	0.136667	0.11	10	5	12	13	5	17	11.6667	9	0.329222	0.59981	0.999443
105379356	'LOC105379356'	mRNA	0	0	0	0	0.14	0	0.0466667	0	0	0	0	0	0.1	0	0.0333333	0	0	0	0	0	1	0	0.333333	0	0.92125	0.82138	0.999443
105379417	'LOC105379417'	mRNA	0.16	0.05	0.05	0.1	0.05	0.05	0.0666667	0.0866667	0.11	0.04	0.04	0.07	0.04	0.04	0.05	0.0633333	3	1	0.99	2	1	1	1.33333	1.66333	-0.0417458	0.979748	0.999443
105379473	'LOC105379473'	mRNA	0	0.05	0	0.05	0	0	0.0166667	0.0166667	0	0.04	0	0.04	0	0	0.0133333	0.0133333	0	0.33	0	0.33	0	0	0.11	0.11
105379474	'LOC105379474'	mRNA	0	0.05	0	0.05	0	0	0.0166667	0.0166667	0	0.04	0	0.04	0	0	0.0133333	0.0133333	0	0.33	0	0.33	0	0	0.11	0.11
105379545	'LOC105379545'	mRNA	0	0.05	0	0.05	0	0	0.0166667	0.0166667	0	0.04	0	0.04	0	0	0.0133333	0.0133333	0	0.33	0	0.33	0	0	0.11	0.11
105379547	'LOC105379547'	mRNA	0.41	0.32	0.29	0.49	0.08	0.16	0.243333	0.34	0.3	0.24	0.22	0.35	0.06	0.12	0.176667	0.253333	10	8.12	7	12	2	4	6	8.37333	-0.525654	0.4822	0.999443
105379554	'LOC105379554'	mRNA	19.47	16.4	15.48	11.96	12.18	11.99	12.0433	17.1167	14.12	12.19	11.36	8.47	8.89	8.77	8.71	12.5567	44.95	40	34	27.94	28.93	29	28.6233	39.65	-0.529607	0.10499	0.999443
105379561	'LOC105379561'	mRNA	0.15	0.28	0.08	0.15	0.15	0.07	0.123333	0.17	0.11	0.21	0.06	0.1	0.11	0.05	0.0866667	0.126667	2	4	1	2	2	1	1.66667	2.33333	-0.522888	0.691967	0.999443
105379752	'LOC105379752'	mRNA	0.01	0.01	0.02	0.02	0.02	0.02	0.02	0.0133333	0.01	0.01	0.02	0.02	0.02	0.02	0.02	0.0133333	1	1	2	2	2	2	2	1.33333	0.541619	0.702918	0.999443
10538	'BATF'	mRNA	0.14	0	0	0	0	0	0	0.0466667	0.1	0	0	0	0	0	0	0.0333333	1	0	0	0	0	0	0	0.333333	-1.0023	0.805965	0.999443
10539	'GLRX3'	mRNA	104.05	95.82	107.08	109.49	98.91	100.63	103.01	102.317	75.44	71.24	78.62	77.54	72.23	73.56	74.4433	75.1	1250	1233	1281	1341	1236	1256	1277.67	1254.67	-0.0151981	0.840748	0.999443
1054	'CEBPG'	mRNA	14.29	13.49	15.3	14.17	14.57	15.79	14.8433	14.36	10.36	10.03	11.24	10.04	10.64	11.54	10.74	10.5433	550	551	585	555	579	629	587.667	562	0.0245019	0.808528	0.999443
10540	'DCTN2'	mRNA	137.35	138.14	132.12	139.33	142.32	142.62	141.423	135.87	99.59	102.7	97	98.67	103.92	104.26	102.283	99.7633	2608	2789	2482	2701	2787	2811	2766.33	2626.33	0.0356453	0.610323	0.999443
10541	'ANP32B'	mRNA	461.79	437.28	389.75	474.01	483.13	479.91	479.017	429.607	334.83	325.11	286.16	335.7	352.8	350.82	346.44	315.367	6219	6261	5182	6508	6709	6715	6644	5887.33	0.135764	0.0702427	0.999443
10542	'LAMTOR5'	mRNA	199.25	174.28	185.6	175.39	179.34	168.22	174.317	186.377	144.47	129.57	136.27	124.21	130.96	122.97	126.047	136.77	1289	1197	1175	1155	1196	1133	1161.33	1220.33	-0.111594	0.1602	0.999443
10544	'PROCR'	mRNA	90.66	93.59	102.25	80.76	83.61	91.79	85.3867	95.5	65.73	69.58	75.07	57.2	61.05	67.1	61.7833	70.1267	991	995	988	872	920	967	919.667	991.333	-0.147826	0.0837169	0.999443
10548	'TM9SF1'	mRNA	31.98	28.25	30.78	28.01	27.5	26.53	27.3467	30.3367	23.19	21	22.6	19.83	20.08	19.39	19.7667	22.2633	668	617	627	588	590	558	578.667	637.333	-0.179966	0.0556217	0.999443
10549	'PRDX4'	mRNA	344.2	320.98	329.2	354.29	319.9	324.52	332.903	331.46	249.57	238.64	241.7	250.91	233.6	237.23	240.58	243.303	2630	2605	2468	2757	2520	2580	2619	2567.67	-0.0123763	0.849703	0.999443
10550	'ARL6IP5'	mRNA	63.3	54.96	64.42	66.61	61.57	61.24	63.14	60.8933	45.9	40.86	47.3	47.18	44.96	44.77	45.6367	44.6867	1308	1208	1318	1404	1312	1314	1343.33	1278	0.0303759	0.696913	0.999443
10551	'AGR2'	mRNA	0	0	0	0.06	0	0	0.02	0	0	0	0	0.04	0	0	0.0133333	0	0	0	0	1	0	0	0.333333	0	0.92125	0.82138	0.999443
10552	'ARPC1A'	mRNA	93.04	89.5	96.55	93.55	90.89	86.06	90.1667	93.03	67.46	66.54	70.89	66.25	66.37	62.91	65.1767	68.2967	1355	1386	1389	1389	1365	1302	1352	1376.67	-0.0669562	0.363788	0.999443
10553	'HTATIP2'	mRNA	138.92	113.54	126.03	127.67	124.03	128.59	126.763	126.163	100.73	84.42	92.53	90.41	90.57	94	91.66	92.56	1759	1498	1561	1676	1626	1663	1655	1606	0.00272579	0.972762	0.999443
10554	'AGPAT1'	mRNA	120.04	117.6	127.31	131.95	127.57	118.98	126.167	121.65	87.04	87.43	93.47	93.45	93.16	86.98	91.1967	89.3133	2589	2697	2703	2908	2831	2672	2803.67	2663	0.0331801	0.616236	0.999443
10555	'AGPAT2'	mRNA	148.74	155.14	136.89	154.42	160.37	150.62	155.137	146.923	107.85	115.34	100.51	109.36	117.11	110.11	112.193	107.9	2087	2316	1894	2202	2313	2196	2237	2099	0.0529603	0.505589	0.999443
10556	'RPP30'	mRNA	13.53	12.44	13.75	13.82	13.25	11.99	13.02	13.24	9.81	9.25	10.1	9.79	9.68	8.77	9.41333	9.72	354	347	361	365	373	333	357	354	-0.0287397	0.800932	0.999443
10557	'RPP38'	mRNA	26.43	25.8	22.06	25.12	20.28	23.76	23.0533	24.7633	19.16	19.18	16.2	17.79	14.81	17.37	16.6567	18.18	256	281	230	254	221	250	241.667	255.667	-0.121482	0.366294	0.999443
10558	'SPTLC1'	mRNA	32.94	24.65	33.23	30.99	29.58	30.72	30.43	30.2733	23.88	18.33	24.4	21.95	21.6	22.46	22.0033	22.2033	856	682	863	845	804	819	822.667	800.333	-0.00224552	0.982495	0.999443
10559	'SLC35A1'	mRNA	10.61	9.01	12.88	11.55	9.68	9.65	10.2933	10.8333	7.69	6.7	9.46	8.18	7.07	7.05	7.43333	7.95	186	168	223	207	175	176	186	192.333	-0.0917044	0.561422	0.999443
1056	'CEL'	mRNA	0.47	0.68	0.69	0.54	0.41	0.74	0.563333	0.613333	0.34	0.51	0.51	0.39	0.3	0.54	0.41	0.453333	11	17	16	13	10	18	13.6667	14.6667	-0.141919	0.779566	0.999443
10560	'SLC19A2'	mRNA	10.7	9.35	12.01	11.98	10.72	8.9	10.5333	10.6867	7.76	6.95	8.82	8.48	7.83	6.51	7.60667	7.84333	386	365	431	450	405	336	397	394	-0.0323693	0.794555	0.999443
10561	'IFI44'	mRNA	9.18	6.28	7.32	5.71	5.52	4.67	5.3	7.59333	6.66	4.67	5.38	4.04	4.03	3.41	3.82667	5.57	147	106	118	94	91	76	87	123.667	-0.548971	0.00645993	0.999443
10564	'ARFGEF2'	mRNA	18.38	13.33	16.36	18.39	16.41	15.95	16.9167	16.0233	13.33	9.91	12.01	13.02	11.98	11.66	12.22	11.75	1705	1334	1524	1755	1574	1537	1622	1521	0.0504525	0.583512	0.999443
10565	'ARFGEF1'	mRNA	8.08	6.59	7.45	8.1	7.22	7.55	7.62333	7.37333	5.86	4.9	5.47	5.74	5.27	5.52	5.51	5.41	618	539	573	637	573	600	603.333	576.667	0.0237896	0.808125	0.999443
10566	'AKAP3'	mRNA	0	0	0.03	0.09	0.03	0	0.04	0.01	0	0	0.03	0.06	0.02	0	0.0266667	0.01	0	0	1	3	1	0	1.33333	0.333333	1.83712	0.41224	0.999443
10567	'RABAC1'	mRNA	187.18	191.69	164.04	184.17	192.63	189.85	188.883	180.97	135.72	142.52	120.44	130.43	140.67	138.78	136.627	132.893	1004	1091	858	1005	1065	1061	1043.67	984.333	0.0460271	0.623247	0.999443
10569	'SLU7'	mRNA	31.78	29.47	29.99	33.19	29.34	30.02	30.85	30.4133	23.04	21.91	22.02	23.5	21.43	21.95	22.2933	22.3233	1093	1071	1023	1146	1013	1050	1069.67	1062.33	-0.0313177	0.694702	0.999443
10570	'DPYSL4'	mRNA	0.79	0.96	0.73	0.62	0.55	0.79	0.653333	0.826667	0.57	0.71	0.53	0.44	0.4	0.58	0.473333	0.603333	21	27	20	17	15	22	18	22.6667	-0.371281	0.377783	0.999443
10572	'SIVA1'	mRNA	235.28	240.34	194.76	230.52	217.19	225.58	224.43	223.46	170.6	178.69	143	163.26	158.6	164.9	162.253	164.097	1269	1379	1030	1261	1208	1271	1246.67	1226	-0.014754	0.876571	0.999443
10573	'MRPL28'	mRNA	173.94	188.59	165.42	173.98	169.73	185.33	176.347	175.983	126.12	140.21	121.45	123.22	123.94	135.48	127.547	129.26	1874	2142	1847	1915	1873	2035	1941	1954.33	-0.049237	0.530628	0.999443
10574	'CCT7'	mRNA	342.09	331.62	329.8	337.5	327.2	319.7	328.133	334.503	248.04	246.55	242.14	239.02	238.93	233.71	237.22	245.577	5975	6147	5692	6000	5878	5793	5890.33	5938	-0.05184	0.376525	0.999443
10575	'CCT4'	mRNA	218.36	194.57	212.24	213.55	213.55	210.52	212.54	208.39	158.32	144.66	155.83	151.24	155.94	153.89	153.69	152.937	5092	4826	4905	5083	5138	5096	5105.67	4941	0.00698863	0.909975	0.999443
10576	'CCT2'	mRNA	183.26	159.15	172.28	187.04	166.55	153.58	169.057	171.563	132.88	118.32	126.49	132.46	121.62	112.27	122.117	125.897	3346	3090	3112	3482	3136	2912	3176.67	3182.67	-0.0447423	0.539518	0.999443
10577	'NPC2'	mRNA	416.43	390.85	395.49	440.37	438.54	449.15	442.687	400.923	301.95	290.59	290.37	311.88	320.23	328.34	320.15	294.303	2650	2662	2508	2860	2879	2973	2904	2606.67	0.116102	0.0803561	0.999443
10578	'GNLY'	mRNA	0	0.17	0.18	0.17	0.17	0.51	0.283333	0.116667	0	0.12	0.13	0.12	0.13	0.37	0.206667	0.0833333	0	1	1	1	1	3	1.66667	0.666667	1.28568	0.475635	0.999443
10579	'TACC2'	mRNA	14.39	13.64	13.87	16.3	14.54	14.99	15.2767	13.9667	10.43	10.14	10.18	11.54	10.62	10.96	11.04	10.25	694	681	623	784	713	698	731.667	666	0.0946753	0.297321	0.999443
1058	'CENPA'	mRNA	23.09	22.47	24.15	23.65	24.43	24.05	24.0433	23.2367	16.74	16.7	17.73	16.75	17.84	17.58	17.39	17.0567	285	294	294	298	311	308	305.667	291	0.0308071	0.798534	0.999443
10580	'SORBS1'	mRNA	0.81	0.98	0.93	0.92	0.49	0.59	0.666667	0.906667	0.59	0.73	0.68	0.65	0.36	0.43	0.48	0.666667	53	64	58	58	32	40	43.3333	58.3333	-0.473168	0.0939218	0.999443
10581	'IFITM2'	mRNA	703.87	665.52	743.09	750.56	711.13	593.49	685.06	704.16	510.36	494.8	545.58	531.56	519.29	433.85	494.9	516.913	3619.74	3631.17	3723.25	3926.35	3769.47	3180.75	3625.52	3658.05	-0.0549753	0.475167	0.999443
10584	'COLEC10'	mRNA	0.03	0.03	0	0.03	0.15	0	0.06	0.02	0.02	0.02	0	0.02	0.11	0	0.0433333	0.0133333	1	1	0	1	5	0	2	0.666667	1.55761	0.394831	0.999443
10585	'POMT1'	mRNA	10.61	10.99	10.28	10.25	10.88	10.55	10.56	10.6267	7.69	8.17	7.55	7.26	7.94	7.72	7.64	7.80333	320	350	307	321	332	333.48	328.827	325.667	-0.0263152	0.823322	0.999443
10587	'TXNRD2'	mRNA	33.17	37.13	27.9	33.96	31.83	35.4	33.73	32.7333	24.05	27.6	20.49	24.05	23.24	25.88	24.39	24.0467	624	745	521	657	621	695	657.667	630	0.0235482	0.837344	0.999443
10588	'MTHFS'	mRNA	6.84	8.23	8.07	6.98	8.3	7.42	7.56667	7.71333	4.96	6.12	5.93	4.94	6.06	5.42	5.47333	5.67	153.88	197	180	160.3	192.73	173.3	175.443	176.96	-0.0526984	0.743271	0.999443
10589	'DRAP1'	mRNA	212.35	230.32	187.46	187.74	220.64	230.28	212.887	210.043	153.97	171.24	137.63	132.96	161.12	168.33	154.137	154.28	1308	1506	1129	1177	1401	1477	1351.67	1314.33	0.00406764	0.970079	0.999443
1059	'CENPB'	mRNA	80.94	84.85	78.33	87.78	84.76	86.25	86.2633	81.3733	58.69	63.09	57.51	62.16	61.9	63.05	62.37	59.7633	2349	2620	2254	2599	2537	2598	2578	2407.67	0.0589394	0.411009	0.999443
10591	'DNPH1'	mRNA	297.67	292.27	280.15	278.54	285.96	287.48	283.993	290.03	215.84	217.3	205.69	197.26	208.81	210.15	205.407	212.943	1313	1358	1196	1250	1300	1318	1289.33	1289	-0.0387961	0.62799	0.999443
10592	'SMC2'	mRNA	22.93	24.73	26.76	28.91	24.33	24.19	25.81	24.8067	16.63	18.39	19.65	20.47	17.77	17.69	18.6433	18.2233	1182	1297	1415	1463	1231	1269	1321	1298	-0.0175919	0.84559	0.999443
10594	'PRPF8'	mRNA	136.73	137.22	139.65	151.45	137.1	135.3	141.283	137.867	99.14	102.02	102.53	107.26	100.11	98.91	102.093	101.23	10604	11326	10764	11988	10966	10885	11279.7	10898	0.00839091	0.886338	0.999443
10597	'TRAPPC2B'	mRNA	10.01	8.36	10.65	8.7	8.8	8.33	8.61	9.67333	7.26	6.22	7.82	6.16	6.42	6.09	6.22333	7.1	53.03	47.01	55	46.87	48.03	46	46.9667	51.68	-0.187746	0.487164	0.999443
10598	'AHSA1'	mRNA	162.07	159.84	141.44	162.18	153.81	156.83	157.607	154.45	117.51	118.84	103.85	114.86	112.32	114.64	113.94	113.4	1919	2014	1652	1958	1878	1929	1921.67	1861.67	0.00624703	0.93681	0.999443
1060	'CENPC'	mRNA	4.13	4.01	4.58	4.01	4.67	4.86	4.51333	4.24	2.99	2.98	3.36	2.84	3.41	3.55	3.26667	3.11	149	150	167	142	169	177	162.667	155.333	0.0272746	0.869247	0.999443
10600	'USP16'	mRNA	5.97	6.11	6.55	7.26	6.05	6.16	6.49	6.21	4.33	4.54	4.81	5.14	4.42	4.5	4.68667	4.56	176	192	192	220	184	189	197.667	186.667	0.0405671	0.782581	0.999443
10602	'CDC42EP3'	mRNA	11.84	11.66	14.4	13.4	12.45	11.42	12.4233	12.6333	8.59	8.67	10.57	9.49	9.09	8.35	8.97667	9.27667	633	662	764	731	686	633	683.333	686.333	-0.0487495	0.631964	0.999443
10603	'SH2B2'	mRNA	9.94	10.85	10.17	10.28	10.41	10	10.23	10.32	7.21	8.07	7.46	7.28	7.6	7.31	7.39667	7.58	218	246	219	229	233	224	228.667	227.667	-0.0336849	0.8033	0.999443
10605	'PAIP1'	mRNA	107.15	92.91	105.46	108.81	110.47	104.58	107.953	101.84	77.69	69.08	77.43	77.06	80.67	76.45	78.06	74.7333	2888	2677	2819	2993	3083	2938	3004.67	2794.67	0.0640092	0.350722	0.999443
10606	'PAICS'	mRNA	92.56	75.75	91.75	87.25	80.78	77.34	81.79	86.6867	67.12	56.32	67.36	61.79	58.98	56.54	59.1033	63.6	3164	2756	3107	3059	2849	2746	2884.67	3009	-0.102924	0.172681	0.999443
10607	'TBL3'	mRNA	13.27	14.81	12.44	13.24	11.25	12.86	12.45	13.5067	9.62	11.01	9.13	9.38	8.21	9.4	8.99667	9.92	956	1136	891	974	836	961	923.667	994.333	-0.146368	0.135155	0.999443
10608	'MXD4'	mRNA	26.54	29.61	26.64	33.6	31.45	29.42	31.49	27.5967	19.24	22.01	19.56	23.8	22.96	21.5	22.7533	20.27	1058	1256	1054	1367	1293	1217	1292.33	1122.67	0.162585	0.0594701	0.999443
10609	'P3H4'	mRNA	65.72	69.16	61.71	64.66	62.3	63.27	63.41	65.53	47.65	51.42	45.3	45.8	45.49	46.25	45.8467	48.1233	1521	1709	1418	1529	1492	1524	1515	1549.33	-0.0718459	0.368651	0.999443
10610	'ST6GALNAC2'	mRNA	5.67	6.18	5.81	6.56	7.33	5.48	6.45667	5.88667	4.11	4.6	4.27	4.64	5.35	4	4.66333	4.32667	102	116	100	116	132	101	116.333	106	0.0944156	0.620666	0.999443
10611	'PDLIM5'	mRNA	12.7	10.34	14.68	13.12	12.25	11.27	12.2133	12.5733	9.21	7.69	10.78	9.29	8.94	8.24	8.82333	9.22667	765.98	660	849.01	771	763	704	746	758.33	-0.0653011	0.532109	0.999443
10612	'TRIM3'	mRNA	10.82	12.5	10.37	10.83	12.12	12.31	11.7533	11.23	7.85	9.29	7.61	7.67	8.85	9	8.50667	8.25	308	380	292	314	356	365	345	326.667	0.0409446	0.753495	0.999443
10613	'ERLIN1'	mRNA	26.5	22.17	25.6	24.89	26.36	26.43	25.8933	24.7567	19.22	16.49	18.8	17.63	19.25	19.32	18.7333	18.17	856	763	820	825	876	885	862	813	0.0444402	0.624722	0.999443
10614	'HEXIM1'	mRNA	28.48	28.71	26.5	30.34	26.29	30.79	29.14	27.8967	20.65	21.35	19.46	21.49	19.19	22.51	21.0633	20.4867	1058	1135	977	1150	1007	1187	1114.67	1056.67	0.0369733	0.676426	0.999443
10615	'SPAG5'	mRNA	59.49	58.35	56.14	59.67	55.65	55.6	56.9733	57.9933	43.14	43.38	41.22	42.26	40.63	40.64	41.1767	42.58	2316	2417	2169	2370	2234	2246	2283.33	2300.67	-0.0513103	0.44847	0.999443
10616	'RBCK1'	mRNA	103.14	117.65	102.69	97.82	107.07	107.53	104.14	107.827	74.78	87.47	75.4	69.28	78.18	78.61	75.3567	79.2167	1516	1891	1536	1474	1643	1685	1600.67	1647.67	-0.0795946	0.402619	0.999443
10617	'STAMBP'	mRNA	38.42	35.36	34.47	38.77	39.57	36.17	38.17	36.0833	27.86	26.29	25.31	27.46	28.9	26.44	27.6	26.4867	876	819	796	919	909	861	896.333	830.333	0.0697937	0.410424	0.999443
10618	'TGOLN2'	mRNA	44.13	37.81	45.66	44.09	46.05	44.14	44.76	42.5333	32	28.11	33.52	31.23	33.63	32.27	32.3767	31.21	2808	2562	2889	2862	3021	2915	2932.67	2753	0.0506164	0.501422	0.999443
1062	'CENPE'	mRNA	3.13	3.33	4.58	4.59	3.65	4.08	4.10667	3.68	2.27	2.47	3.36	3.25	2.66	2.98	2.96333	2.7	277	313	402	415	334	376	375	330.667	0.137692	0.327525	0.999443
10620	'ARID3B'	mRNA	3.17	3.36	3.63	3.08	3.45	3.2	3.24333	3.38667	2.3	2.5	2.66	2.18	2.52	2.34	2.34667	2.48667	139	157	158	138	157	146	147	151.333	-0.0817197	0.620446	0.999443
10621	'POLR3F'	mRNA	6.31	4.98	5.33	6.18	6.25	5.65	6.02667	5.54	4.57	3.7	3.91	4.37	4.57	4.13	4.35667	4.06	132	111	111	132	135	123	130	118	0.099261	0.577307	0.999443
10622	'POLR3G'	mRNA	6	4.47	6.47	5.25	4.38	4.61	4.74667	5.64667	4.35	3.32	4.75	3.72	3.2	3.37	3.43	4.14	202	160	215	179	151	161	163.667	192.333	-0.275848	0.0888999	0.999443
10623	'POLR3C'	mRNA	16.41	15.54	16.3	22.04	17.32	17.74	19.0333	16.0833	11.89	11.55	11.97	15.61	12.65	12.97	13.7433	11.8033	399	394	405	536	449	453	479.333	399.333	0.221149	0.0403339	0.999443
10625	'IVNS1ABP'	mRNA	30.79	27.48	31.06	29.76	29.1	28.35	29.07	29.7767	22.32	20.43	22.81	21.07	21.25	20.72	21.0133	21.8533	1366	1303	1368	1344	1327	1304	1325	1345.67	-0.0631872	0.399822	0.999443
10626	'TRIM16'	mRNA	18.8	16.38	17.57	19.1	16.24	14.76	16.7	17.5833	13.63	12.18	12.9	13.53	11.86	10.79	12.06	12.9033	494.52	495.85	482.93	522.75	469.46	442.24	478.15	491.1	-0.0793671	0.436969	0.999443
10627	'MYL12A'	mRNA	282.98	257.71	285.1	269.8	288.53	267.29	275.207	275.263	205.18	191.61	209.32	191.07	210.69	195.4	199.053	202.037	2170.45	2098	2146	2108.05	2282	2133	2174.35	2138.15	-0.0156231	0.829554	0.999443
10628	'TXNIP'	mRNA	360.22	325.28	345.75	273.83	274.04	303.3	283.723	343.75	261.18	241.84	253.85	193.93	200.11	221.71	205.25	252.29	10490	10063	9977	8141	8219	9178	8512.67	10176.7	-0.296998	2.07e-05	0.0249422
10629	'TAF6L'	mRNA	12.71	12.16	13.12	14.28	11.21	11.86	12.45	12.6633	9.22	9.04	9.63	10.11	8.19	8.67	8.99	9.29667	244	248	248	279	219	236	244.667	246.667	-0.0541236	0.687692	0.999443
1063	'CENPF'	mRNA	19.41	20.59	20.98	22.57	19.4	19.65	20.54	20.3267	14.07	15.31	15.4	15.98	14.17	14.36	14.8367	14.9267	2071	2330	2247	2457	2137	2170	2254.67	2216	-0.0169098	0.821881	0.999443
10631	'POSTN'	mRNA	0	0	0.03	0	0	0	0	0.01	0	0	0.02	0	0	0	0	0.00666667	0	0	1	0	0	0	0	0.333333	-1.0023	0.805965	0.999443
10632	'ATP5MG'	mRNA	186.68	165.35	186.74	172.03	175.43	169.38	172.28	179.59	135.36	122.93	137.1	121.83	128.1	123.82	124.583	131.797	1767	1663	1739	1659	1712	1667	1679.33	1723	-0.0774126	0.290448	0.999443
10633	'RASL10A'	mRNA	0	0	0	0	0.11	0	0.0366667	0	0	0	0	0	0.08	0	0.0266667	0	0	0	0	0	2	0	0.666667	0	1.83407	0.598566	0.999443
10634	'GAS2L1'	mRNA	55.56	61.32	47.6	55.36	60.44	57.11	57.6367	54.8267	40.29	45.59	34.95	39.21	44.13	41.75	41.6967	40.2767	1364	1607	1154	1387	1527	1459	1457.67	1375	0.0466822	0.644498	0.999443
10635	'RAD51AP1'	mRNA	38.57	33.73	38.92	39.3	38.92	35.64	37.9533	37.0733	27.97	25.08	28.58	27.84	28.42	26.06	27.44	27.21	789	734	788	821	821	757	799.667	770.333	0.0127952	0.885305	0.999443
10636	'RGS14'	mRNA	7.5	8.96	6.85	6.87	8	8.52	7.79667	7.77	5.44	6.67	5.03	4.86	5.84	6.23	5.64333	5.71333	174	219	160	163	191	203	185.667	184.333	-0.0268792	0.869651	0.999443
10637	'LEFTY1'	mRNA	0	0.06	0	0	0.13	0.06	0.0633333	0.02	0	0.05	0	0	0.09	0.05	0.0466667	0.0166667	0	0.99	0	0	2	1	1	0.33	2.41819	0.379494	0.999443
10640	'EXOC5'	mRNA	6.22	4.77	7.17	6.16	5.51	6.12	5.93	6.05333	4.51	3.55	5.26	4.36	4.02	4.48	4.28667	4.44	505	417	564	505	445	495	481.667	495.333	-0.0830961	0.490935	0.999443
10641	'NPRL2'	mRNA	30.54	30.93	30.07	27.37	28.66	28.38	28.1367	30.5133	22.14	23	22.08	19.38	20.93	20.75	20.3533	22.4067	416	449	403	380	406	406	397.333	422.667	-0.128505	0.239485	0.999443
10642	'IGF2BP1'	mRNA	10.4	9.73	10.72	11.49	10.44	10.27	10.7333	10.2833	7.54	7.23	7.87	8.14	7.62	7.51	7.75667	7.54667	979	974	1002	1103	1014	1003	1040	985	0.0368809	0.645258	0.999443
10643	'IGF2BP3'	mRNA	21.9	19.36	24.72	24.27	20.46	24.28	23.0033	21.9933	15.88	14.4	18.15	17.19	14.94	17.75	16.6267	16.1433	851	817	1016	955	838	929	907.333	894.667	-0.0223399	0.824324	0.999443
10644	'IGF2BP2'	mRNA	12.96	12.32	13.46	13.32	13.09	12.16	12.8567	12.9133	9.4	9.16	9.88	9.44	9.56	8.89	9.29667	9.48	463	448	466	484	486	469	479.667	459	0.022815	0.822017	0.999443
10645	'CAMKK2'	mRNA	17.35	17.84	17.64	17.7	17.31	17.07	17.36	17.61	12.58	13.26	12.95	12.54	12.64	12.48	12.5533	12.93	833	912	836	879	866	816	853.667	860.333	-0.0516852	0.542774	0.999443
10650	'PRELID3A'	mRNA	3.49	3.35	3.69	3.61	3.6	3.34	3.51667	3.51	2.53	2.49	2.71	2.56	2.63	2.44	2.54333	2.57667	58	58	59	61	59	56	58.6667	58.3333	-0.0328011	0.894276	0.999443
10651	'MTX2'	mRNA	33.12	30.1	32.58	33.9	31.49	35.44	33.61	31.9333	24.01	22.38	23.92	24.01	22.99	25.91	24.3033	23.4367	407	394	399	425	399	451	425	400	0.0469843	0.664926	0.999443
10652	'YKT6'	mRNA	66.92	66.66	66.51	70.93	63.72	65.5	66.7167	66.6967	48.52	49.56	48.83	50.23	46.53	47.88	48.2133	48.97	1853	1963	1825	2001	1818	1881	1900	1880.33	-0.02589	0.709794	0.999443
10653	'SPINT2'	mRNA	1.14	1.02	0.77	0.62	1.42	0.8	0.946667	0.976667	0.83	0.76	0.57	0.44	1.04	0.58	0.686667	0.72	18	17	12	10	23	13	15.3333	15.6667	-0.0654409	0.895641	0.999443
10654	'PMVK'	mRNA	34.1	33.95	28.36	32.32	29.04	26.71	29.3567	32.1367	24.72	25.24	20.82	22.89	21.21	19.53	21.21	23.5933	279	295	228	270	244	227	247	267.333	-0.154592	0.258296	0.999443
10656	'KHDRBS3'	mRNA	0.42	0.2	0.44	0.07	0.34	0.22	0.21	0.353333	0.31	0.15	0.33	0.05	0.25	0.16	0.153333	0.263333	8	3	8	1	6	4	3.66667	6.33333	-0.824015	0.352051	0.999443
10657	'KHDRBS1'	mRNA	136.29	124.82	125.5	136.2	131.95	130.66	132.937	128.87	98.82	92.8	92.15	96.46	96.35	95.52	96.11	94.59	3685	3592	3362	3758	3679	3669	3702	3546.33	0.0218088	0.729719	0.999443
10658	'CELF1'	mRNA	21.03	17.99	22.26	20.02	18.44	18.91	19.1233	20.4267	15.25	13.38	16.34	14.18	13.46	13.82	13.82	14.99	1631	1443	1732	1569	1444	1447	1486.67	1602	-0.150136	0.0784499	0.999443
10659	'CELF2'	mRNA	0.01	0	0	0	0.04	0	0.0133333	0.00333333	0.01	0	0	0	0.03	0	0.01	0.00333333	1	0	0	0	1	0	0.333333	0.333333	-0.0405184	0.990082	0.999443
10661	'KLF1'	mRNA	0.07	0.06	0	0	0	0	0	0.0433333	0.05	0.05	0	0	0	0	0	0.0333333	1	1	0	0	0	0	0	0.666667	-1.88953	0.555899	0.999443
10664	'CTCF'	mRNA	21.98	21.56	22.89	27.57	25.47	24.31	25.7833	22.1433	15.94	16.03	16.8	19.53	18.6	17.77	18.6333	16.2567	830	871	851	1057	981	960	999.333	850.667	0.19115	0.0194195	0.999443
10666	'CD226'	mRNA	0.02	0	0.01	0.04	0	0.04	0.0266667	0.01	0.01	0	0.01	0.03	0	0.03	0.02	0.00666667	2	0	1	4	0	4.29	2.76333	1	1.36494	0.378778	0.999443
10667	'FARS2'	mRNA	24.15	22.7	26.91	26.97	28.33	25.44	26.9133	24.5867	17.51	16.88	19.76	19.1	20.69	18.6	19.4633	18.05	375	377	415	426	452	420	432.667	389	0.112779	0.30812	0.999443
10668	'CGRRF1'	mRNA	4.05	3.59	3.65	3.79	4.47	3.9	4.05333	3.76333	2.94	2.67	2.68	2.68	3.26	2.85	2.93	2.76333	76	73	68	73	87	76	78.6667	72.3333	0.0819163	0.712784	0.999443
10669	'CGREF1'	mRNA	0.05	0.1	0.11	0	0.1	0.05	0.05	0.0866667	0.04	0.08	0.08	0	0.07	0.04	0.0366667	0.0666667	1	2	1	0	1	1	0.666667	1.33333	-1.02799	0.585035	0.999443
10670	'RRAGA'	mRNA	107.12	108.4	104.93	112.51	108.42	111.6	110.843	106.817	77.67	80.59	77.04	79.68	79.17	81.58	80.1433	78.4333	1580	1700	1529	1692	1649	1710	1683.67	1603	0.0309173	0.671415	0.999443
106707243	'PRH1-TAS2R14'	mRNA	1.17	0.99	1.51	1.47	0.68	0.81	0.986667	1.22333	0.85	0.73	1.11	1.04	0.49	0.59	0.706667	0.896667	18.48	16.61	23.72	23.74	11.03	13.31	16.0267	19.6033	-0.32611	0.485998	0.999443
10671	'DCTN6'	mRNA	91.35	68.83	82.91	87.2	78.71	83.76	83.2233	81.03	66.24	51.17	60.87	61.76	57.48	61.23	60.1567	59.4267	797	638	711	775	708	760	747.667	715.333	0.0224538	0.821739	0.999443
10672	'GNA13'	mRNA	13.24	10.94	14.79	14.1	13.36	12.02	13.16	12.99	9.6	8.13	10.86	9.99	9.76	8.79	9.51333	9.53	876	770	972	952	903	825	893.333	872.667	-0.00897987	0.928954	0.999443
10673	'TNFSF13B'	mRNA	0	0.04	0.04	0.04	0	0	0.0133333	0.0266667	0	0.03	0.03	0.03	0	0	0.01	0.02	0	1	1	1	0	0	0.333333	0.666667	-0.938071	0.724553	0.999443
10675	'CSPG5'	mRNA	1.34	1.2	1.4	1.08	0.84	0.97	0.963333	1.31333	0.97	0.9	1.03	0.76	0.61	0.71	0.693333	0.966667	28	27	29	23	18	21	20.6667	28	-0.480195	0.206577	0.999443
10677	'AVIL'	mRNA	0.03	0.14	0.05	0.07	0.1	0.1	0.09	0.0733333	0.02	0.1	0.04	0.05	0.07	0.07	0.0633333	0.0533333	1	4	1	3	2	2	2.33333	2	0.183525	0.885298	0.999443
10678	'B3GNT2'	mRNA	8.88	7.73	9.14	8.24	8.47	7.37	8.02667	8.58333	6.44	5.75	6.71	5.84	6.18	5.38	5.8	6.3	245	227	250	232	241	211	228	240.667	-0.119071	0.380744	0.999443
10681	'GNB5'	mRNA	14	14.25	13.46	15.32	14.66	16.17	15.3833	13.9033	10.15	10.59	9.88	10.85	10.71	11.82	11.1267	10.2067	486	534	468	530	556	593	559.667	496	0.135222	0.191238	0.999443
10682	'EBP'	mRNA	96.54	94.61	88.81	90.31	82.51	78.28	83.7	93.32	70	70.34	65.21	63.96	60.25	57.22	60.4767	68.5167	918	956	831	875	809	774	819.333	901.667	-0.178836	0.040566	0.999443
106821730	'BUB1B-PAK6'	mRNA	1.04	0.75	1.17	1.19	0.82	0.72	0.91	0.986667	0.75	0.56	0.86	0.84	0.6	0.53	0.656667	0.723333	41.37	31.19	46.27	48.6	33.04	29.98	37.2067	39.61	-0.147246	0.64871	0.999443
10683	'DLL3'	mRNA	1.04	1.19	1.48	1.53	1.51	1.52	1.52	1.23667	0.75	0.88	1.09	1.08	1.11	1.11	1.1	0.906667	20	25	29	30	31	31	30.6667	24.6667	0.273052	0.44872	0.999443
10686	'CLDN16'	mRNA	0	0	0	0.03	0	0	0.01	0	0	0	0	0.02	0	0	0.00666667	0	0	0	0	1	0	0	0.333333	0	0.92125	0.82138	0.999443
106865373	'GET1-SH3BGR'	mRNA	0.74	1	0.69	0.66	0	1.12	0.593333	0.81	0.54	0.75	0.51	0.47	0	0.82	0.43	0.6	8.72	12.6	8.07	7.99	0	12.84	6.94333	9.79667	-0.599686	0.435999	0.999443
10687	'PNMA2'	mRNA	0.59	0.72	0.9	0.6	0.39	0.78	0.59	0.736667	0.43	0.54	0.66	0.42	0.28	0.57	0.423333	0.543333	29	38	44	30	19.86	40	29.9533	37	-0.360471	0.308787	0.999443
1069	'CETN2'	mRNA	29.07	25.27	30.42	25.97	23.38	23.35	24.2333	28.2533	21.08	18.79	22.33	18.39	17.07	17.07	17.51	20.7333	369	341	381	336	306	308	316.667	363.667	-0.241424	0.0387849	0.999443
10691	'GMEB1'	mRNA	9.04	7.12	7.43	8.32	6.35	8.33	7.66667	7.86333	6.55	5.29	5.45	5.89	4.64	6.09	5.54	5.76333	281	231	235	235	219	258	237.333	249	-0.109424	0.433622	0.999443
10693	'CCT6B'	mRNA	0.24	0.19	0.21	0.47	0.69	0.26	0.473333	0.213333	0.18	0.14	0.15	0.33	0.5	0.19	0.34	0.156667	4	3	3	7	10	4	7	3.33333	1.03033	0.226036	0.999443
10694	'CCT8'	mRNA	201.51	176.37	191.63	200.47	175.62	185.65	187.247	189.837	146.11	131.13	140.7	141.98	128.24	135.72	135.313	139.313	3551	3307	3342	3602	3193	3399	3398	3400	-0.0422701	0.528202	0.999443
10695	'CNPY3'	mRNA	86.1	91.77	81.81	87.59	87.71	89.3	88.2	86.56	62.43	68.23	60.07	62.03	64.04	65.28	63.7833	63.5767	1127	1264.96	1055.89	1165.87	1180.97	1212	1186.28	1149.28	0.00659284	0.937972	0.999443
10699	'CORIN'	mRNA	0.04	0	0.02	0.04	0	0	0.0133333	0.02	0.03	0	0.01	0.03	0	0	0.01	0.0133333	1	0	1	2	0	0	0.666667	0.666667	-0.0715614	0.97638	0.999443
1070	'CETN3'	mRNA	6.09	4.21	5.97	5.87	6.09	5.65	5.87	5.42333	4.41	3.13	4.38	4.16	4.45	4.13	4.24667	3.97333	118	94	104	124	118	119	120.333	105.333	0.151009	0.416963	0.999443
107080638	'TBC1D7-LOC100130357'	mRNA	0	0.04	0	0	0.06	0	0.02	0.0133333	0	0.03	0	0	0.04	0	0.0133333	0.01	0	1.09	0	0	1.45	0	0.483333	0.363333	-0.0405185	0.990097	0.999443
107080644	'CNPY3-GNMT'	mRNA	0	0.21	0.48	0.77	0.25	0	0.34	0.23	0	0.16	0.35	0.55	0.18	0	0.243333	0.17	0	1.46	3.11	6.13	2.03	0	2.72	1.52333	0.934362	0.532478	0.999443
1071	'CETP'	mRNA	0	0	0.13	0.07	0.07	0.07	0.07	0.0433333	0	0	0.09	0.05	0.05	0.05	0.05	0.03	0	0	2	1	1	1	1	0.666667	0.532137	0.799577	0.999443
10712	'FAM189B'	mRNA	48.43	49.08	48.91	51.44	51.95	49.54	50.9767	48.8067	35.12	36.49	35.91	36.43	37.94	36.21	36.86	35.84	1487	1602	1502	1614	1646	1582	1614	1530.33	0.0367156	0.614668	0.999443
10713	'USP39'	mRNA	74.13	73.97	76.43	78.99	76.43	72.73	76.05	74.8433	53.75	55	56.12	55.94	55.81	53.17	54.9733	54.9567	1523	1613	1526	1643	1626	1551	1606.67	1554	0.00759633	0.915479	0.999443
10714	'POLD3'	mRNA	34.41	26.45	30.24	33.08	30.38	32.09	31.85	30.3667	24.95	19.67	22.2	23.43	22.18	23.46	23.0233	22.2733	1020	910	940	988	988	999	991.667	956.667	0.0114504	0.89179	0.999443
10715	'CERS1'	mRNA	7.82	8.79	6.9	7.18	6.76	7.19	7.04333	7.83667	5.67	6.54	5.06	5.09	4.94	5.26	5.09667	5.75667	170.89	202.93	150.14	161.86	155.68	164.24	160.593	174.653	-0.160242	0.318817	0.999443
10717	'AP4B1'	mRNA	13.1	11.11	10.82	11.78	12.3	9.3	11.1267	11.6767	9.5	8.26	7.94	8.34	8.98	6.8	8.04	8.56667	261	250	223	252	252	201	235	244.667	-0.0989415	0.479665	0.999443
1072	'CFL1'	mRNA	1194.9	1150.04	1255.6	1248.35	1170.35	1122.65	1180.45	1200.18	866.39	855.03	921.87	884.1	854.62	820.67	853.13	881.097	12948	13245	13406	13786	13076	12645	13169	13199.7	-0.044708	0.435537	0.999443
10721	'POLQ'	mRNA	4.22	3.82	4.51	4.04	4	3.29	3.77667	4.18333	3.06	2.84	3.31	2.86	2.92	2.4	2.72667	3.07	396	382	421	387	387	320	364.667	399.667	-0.173997	0.137908	0.999443
10723	'SLC12A7'	mRNA	26.84	26.92	26.89	30.36	28.6	29.47	29.4767	26.8833	19.46	20.02	19.74	21.5	20.89	21.54	21.31	19.74	1494	1595	1487	1725	1642	1702	1689.67	1525.33	0.107219	0.132988	0.999443
10724	'OGA'	mRNA	33.99	28	31.89	34.7	30.03	30.54	31.7567	31.2933	24.65	20.81	23.42	24.57	21.93	22.33	22.9433	22.96	1829	1575	1709	1858	1657	1671	1728.67	1704.33	-0.0215211	0.787708	0.999443
10725	'NFAT5'	mRNA	3.7	2.93	4.97	4.43	3.61	3.33	3.79	3.86667	2.68	2.18	3.65	3.14	2.64	2.44	2.74	2.83667	530	443	703	649	515	494	552.667	558.667	-0.0617775	0.668619	0.999443
10726	'NUDC'	mRNA	239.56	256.1	223.7	249.92	243.92	229.76	241.2	239.787	173.7	190.4	164.24	176.99	178.12	167.96	174.357	176.113	3828	4364	3567	4082	4082	3872	4012	3919.67	-0.00587077	0.937358	0.999443
10728	'PTGES3'	mRNA	253.01	209.43	270.82	256.6	229.72	220.05	235.457	244.42	183.45	155.71	198.84	181.73	167.75	160.86	170.113	179.333	4543	4003	4825	4701	4271	4116	4362.67	4457	-0.0737745	0.359203	0.999443
107282092	'BOLA2-SMG1P6'	mRNA	38.14	31.88	35.4	40.62	35.05	34.25	36.64	35.14	27.66	23.71	25.99	28.77	25.6	25.04	26.47	25.7867	651.68	591.49	570.59	658.84	602.31	603.65	621.6	604.587	-0.000956	0.992019	0.999443
1073	'CFL2'	mRNA	27.19	20.18	27.38	27.71	25.95	25.08	26.2467	24.9167	19.71	15	20.1	19.62	18.95	18.34	18.97	18.27	889	698	886	929	896	855	893.333	824.333	0.0738118	0.472714	0.999443
10730	'YME1L1'	mRNA	40.37	33.61	38.91	40.88	37.29	35.15	37.7733	37.63	29.27	24.99	28.57	28.95	27.23	25.7	27.2933	27.61	1761	1565	1689	1822	1681	1593	1698.67	1671.67	-0.018812	0.810253	0.999443
107303344	'SETDB2-PHF11'	mRNA	1.5	1.1	1.27	1.84	1.44	1.11	1.46333	1.29	1.09	0.82	0.94	1.3	1.05	0.81	1.05333	0.95	57.22	44.76	48.24	71.41	56.45	43.77	57.21	50.0733	0.146347	0.594298	0.999443
10732	'TCFL5'	mRNA	60.05	57.51	51.59	55.53	58.46	58.21	57.4	56.3833	43.54	42.76	37.88	39.32	42.69	42.55	41.52	41.3933	1585	1624	1364	1531	1615	1632	1592.67	1524.33	0.0246089	0.766496	0.999443
10733	'PLK4'	mRNA	9.64	7.74	11.07	9.97	10.36	8.03	9.45333	9.48333	6.99	5.75	8.13	7.06	7.57	5.87	6.83333	6.95667	379	323	431	399	420	327	382	377.667	-0.0260969	0.845472	0.999443
10734	'STAG3'	mRNA	1.48	1.45	0.93	1.23	1.45	1.36	1.34667	1.28667	1.08	1.08	0.69	0.87	1.06	1	0.976667	0.95	60	62	37	51	58	57	55.3333	53	0.024956	0.927197	0.999443
10735	'STAG2'	mRNA	22.17	18.72	24.02	23.86	22.19	20.69	22.2467	21.6367	16.08	13.92	17.64	16.9	16.2	15.13	16.0767	15.88	1329	1202	1456	1459	1344	1264	1355.67	1329	-0.0141156	0.875254	0.999443
10736	'SIX2'	mRNA	25.79	26.22	25.19	25.91	30.48	25.72	27.37	25.7333	18.7	19.49	18.49	18.35	22.26	18.8	19.8033	18.8933	559	607	541	575	683	581	613	569	0.0686185	0.513782	0.999443
10741	'RBBP9'	mRNA	6.76	5.9	8.49	7.24	6.94	6.51	6.89667	7.05	4.9	4.39	6.24	5.13	5.07	4.76	4.98667	5.17667	267	248	333	292	283	267	280.667	282.667	-0.0528216	0.702969	0.999443
10743	'RAI1'	mRNA	16.87	19.58	18.11	19.49	18.51	19.06	19.02	18.1867	12.23	14.56	13.3	13.8	13.51	13.93	13.7467	13.3633	1367	1684	1446	1613	1542	1597	1584	1499	0.0396059	0.637295	0.999443
10744	'PTTG2'	mRNA	0	0	0	0	0	0.19	0.0633333	0	0	0	0	0	0	0.14	0.0466667	0	0	0	0	0	0	1	0.333333	0	0.92125	0.82138	0.999443
10745	'PHTF1'	mRNA	17.19	15.18	15.41	17.23	16.41	15.38	16.34	15.9267	12.46	11.29	11.31	12.2	11.98	11.24	11.8067	11.6867	458	441	417	482	447	430	453	438.667	0.00538164	0.958774	0.999443
10746	'MAP3K2'	mRNA	3.67	2.77	4.18	4.05	3.43	3.22	3.56667	3.54	2.66	2.06	3.07	2.87	2.51	2.36	2.58	2.59667	450	361	510	507	434	410	450.333	440.333	-0.0117996	0.927906	0.999443
10747	'MASP2'	mRNA	0	0.18	0	0	0	0	0	0.06	0	0.14	0	0	0	0	0	0.0466667	0	1	0	0	0	0	0	0.333333	-1.0023	0.805965	0.999443
10749	'KIF1C'	mRNA	76.71	80.45	73.67	79.7	82.43	78.85	80.3267	76.9433	55.62	59.81	54.09	56.44	60.19	57.64	58.09	56.5067	4477	4979	4304	4759	4954	4781	4831.33	4586.67	0.0357628	0.605305	0.999443
1075	'CTSC'	mRNA	39.8	32.7	40.78	41.05	36.42	38.89	38.7867	37.76	28.86	24.31	29.94	29.07	26.59	28.43	28.03	27.7033	813.01	723	843	869.01	778	824	823.67	793.003	0.0127028	0.891694	0.999443
10750	'GRAP'	mRNA	0.31	0.49	0.35	0.74	0.4	0.66	0.6	0.383333	0.23	0.37	0.26	0.53	0.29	0.48	0.433333	0.286667	6	9	6	14	7	13	11.3333	7	0.652924	0.302899	0.999443
10752	'CHL1'	mRNA	0.01	0.01	0	0.01	0	0.01	0.00666667	0.00666667	0.01	0.01	0	0.01	0	0.01	0.00666667	0.00666667	1	1	0	1	0	2	1	0.666667	0.550453	0.793459	0.999443
10753	'CAPN9'	mRNA	0	0.06	0	0.03	0.07	0	0.0333333	0.02	0	0.05	0	0.02	0.05	0	0.0233333	0.0166667	0	1	0	1	1	0	0.666667	0.333333	0.848888	0.750558	0.999443
10755	'GIPC1'	mRNA	130.34	148.35	122.36	131.64	125.49	127.57	128.233	133.683	94.51	110.29	89.84	93.23	91.64	93.25	92.7067	98.2133	2250	2715	2048	2291	2224	2272	2262.33	2337.67	-0.0861956	0.327782	0.999443
10758	'TRAF3IP2'	mRNA	10.32	8.61	10.31	11.12	11.42	10.31	10.95	9.74667	7.48	6.4	7.57	7.87	8.34	7.54	7.91667	7.15	642	571.5	640	706	729	664.17	699.723	617.833	0.138817	0.151066	0.999443
10761	'PLAC1'	mRNA	7.91	8.09	7.05	5.2	5.43	8.01	6.21333	7.68333	5.74	6.02	5.18	3.68	3.97	5.85	4.5	5.64667	72	78	63	47	50	75	57.3333	71	-0.34569	0.177563	0.999443
10762	'NUP50'	mRNA	19.68	15.7	18.08	21.03	18.29	18.3	19.2067	17.82	14.27	11.67	13.27	14.89	13.35	13.38	13.8733	13.07	1073	912	979	1171	1030	1036	1079	988	0.0851127	0.337093	0.999443
10763	'NES'	mRNA	3.34	3.73	3.54	2.86	3.26	3.29	3.13667	3.53667	2.42	2.78	2.6	2.02	2.38	2.4	2.26667	2.6	196	233	206	171	197	200	189.333	211.667	-0.199557	0.18099	0.999443
10765	'KDM5B'	mRNA	17.03	15.55	17.97	18.93	16.96	16.2	17.3633	16.85	12.35	11.56	13.19	13.4	12.38	11.85	12.5433	12.3667	1248	1203	1298	1413	1267	1218	1299.33	1249.67	0.013983	0.862625	0.999443
10766	'TOB2'	mRNA	20.62	21.44	24.36	23.15	22.51	20.53	22.0633	22.14	14.95	15.94	17.88	16.4	16.44	15	15.9467	16.2567	940	1036	1099	1075	1060	971	1035.33	1025	-0.027028	0.760343	0.999443
10767	'HBS1L'	mRNA	13.77	11.36	13.59	13.44	11.7	11.83	12.3233	12.9067	9.99	8.45	9.98	9.52	8.54	8.65	8.90333	9.47333	959	864	957	974	867	876	905.667	926.667	-0.0751364	0.391097	0.999443
10768	'AHCYL1'	mRNA	169.51	150.15	171.93	169.16	158.24	153.65	160.35	163.863	122.91	111.64	126.23	119.8	115.55	112.32	115.89	120.26	6905	6503	6948	7028	6641	6487	6718.67	6785.33	-0.0558225	0.370946	0.999443
10769	'PLK2'	mRNA	25.44	23.67	24.21	27.75	21.26	21.91	23.64	24.44	18.44	17.6	17.78	19.65	15.52	16.02	17.0633	17.94	709	702	669	789	611	634	678	693.333	-0.0749604	0.455805	0.999443
10771	'ZMYND11'	mRNA	10.78	9.44	11.41	12.7	10.95	12.02	11.89	10.5433	7.82	7.02	8.37	8.99	8	8.79	8.59333	7.73667	439	416	461	534	452	509	498.333	438.667	0.141995	0.185119	0.999443
10772	'SRSF10'	mRNA	35.84	30.15	35.38	38.54	33.9	34.56	35.6667	33.79	25.99	22.42	25.97	27.3	24.76	25.27	25.7767	24.7933	1740	1483	1671	1857	1577	1671	1701.67	1631.33	0.0183848	0.828164	0.999443
10773	'ZBTB6'	mRNA	5.85	3.5	6.46	5.96	4.94	5.18	5.36	5.27	4.24	2.6	4.75	4.22	3.61	3.79	3.87333	3.86333	248	158	272	258	216	228	234	226	0.00567803	0.973934	0.999443
10775	'POP4'	mRNA	14.69	13.29	14.66	14.55	13.78	13.77	14.0333	14.2133	10.65	9.88	10.76	10.31	10.06	10.06	10.1433	10.43	372	358	368	376	360	362	366	366	-0.0409142	0.711046	0.999443
10776	'ARPP19'	mRNA	21.33	16.94	24.77	20.65	18.36	18.25	19.0867	21.0133	15.47	12.59	18.19	14.62	13.41	13.34	13.79	15.4167	1203	1014	1387	1187	1064	1067	1106	1201.33	-0.162773	0.122979	0.999443
10780	'ZNF234'	mRNA	3.16	2.16	2.12	3.16	2.1	2.6	2.62	2.48	2.29	1.61	1.55	2.24	1.53	1.9	1.89	1.81667	119	85	80	117	83	100.83	100.277	94.6667	0.0369062	0.864154	0.999443
10781	'ZNF266'	mRNA	11.56	11.95	11.02	11.08	11.23	11.18	11.1633	11.51	8.38	8.89	8.09	7.85	8.2	8.17	8.07333	8.45333	435	479	408	426	438	434	432.667	440.667	-0.0658939	0.538871	0.999443
10782	'ZNF274'	mRNA	15.95	16.75	15.9	17.74	15.12	16.94	16.6	16.2	11.57	12.46	11.67	12.56	11.04	12.38	11.9933	11.9	417	439	402	448	410	455	437.667	419.333	0.0213561	0.840609	0.999443
10783	'NEK6'	mRNA	15.1	15.05	15.28	15.46	14.78	14.95	15.0633	15.1433	10.95	11.19	11.22	10.95	10.79	10.93	10.89	11.12	517	531	510	522	512	514	516	519.333	-0.0497059	0.607804	0.999443
10785	'WDR4'	mRNA	30.77	32.64	25.89	29.92	28.52	32.04	30.16	29.7667	22.31	24.27	19.01	21.19	20.83	23.42	21.8133	21.8633	448	497	371	448	423	484	451.667	438.667	0.00333286	0.977558	0.999443
10787	'NCKAP1'	mRNA	41.25	32.04	43.74	44.74	37.14	36.2	39.36	39.01	29.91	23.82	32.11	31.68	27.12	26.46	28.42	28.6133	2023.22	1670	2112	2215	1886	1849	1983.33	1935.07	-0.00817799	0.931599	0.999443
10788	'IQGAP2'	mRNA	0.35	0.36	0.48	0.67	0.44	0.41	0.506667	0.396667	0.26	0.27	0.35	0.47	0.32	0.3	0.363333	0.293333	17	21	29	35	27	23	28.3333	22.3333	0.298049	0.442444	0.999443
10791	'VAMP5'	mRNA	8.01	6.91	4.48	6.3	5.77	7.9	6.65667	6.46667	5.81	5.14	3.29	4.46	4.22	5.77	4.81667	4.74667	35	32	19	28	26	36	30	28.6667	0.0281736	0.938352	0.999443
10793	'ZNF273'	mRNA	0.43	0.72	0.88	0.88	0.51	0.7	0.696667	0.676667	0.31	0.54	0.64	0.62	0.37	0.51	0.5	0.496667	20	35.5	39	41	25	34.96	33.6533	31.5	0.0446331	0.900603	0.999443
10794	'ZNF460'	mRNA	0.16	0.12	0.32	0.12	0.18	0.17	0.156667	0.2	0.11	0.09	0.23	0.09	0.13	0.12	0.113333	0.143333	6	4	10	5	6	7	6	6.66667	-0.194367	0.795378	0.999443
10795	'ZNF268'	mRNA	1.17	1.13	1.25	1.25	1.09	1.02	1.12	1.18333	0.84	0.84	0.92	0.88	0.8	0.74	0.806667	0.866667	170	175.07	181	186	164	154	168	175.357	-0.103665	0.49926	0.999443
10797	'MTHFD2'	mRNA	99.51	90.83	99.9	100.75	104.29	98.68	101.24	96.7467	72.15	67.53	73.35	71.36	76.15	72.14	73.2167	71.01	2812	2652	2815	2776	2972	2794	2847.33	2759.67	0.0048971	0.945267	0.999443
107983993	'UPK3BL2'	mRNA	3.1	3.6	4.52	3.65	4.72	3.44	3.93667	3.74	2.25	2.68	3.32	2.59	3.44	2.52	2.85	2.75	54.61	67.4	78.77	65.56	85.61	62.95	71.3733	66.9267	0.0509618	0.836625	0.999443
107983998	'LOC107983998'	mRNA	0.56	1.06	0.71	0.89	0.7	0.54	0.71	0.776667	0.41	0.79	0.52	0.63	0.51	0.39	0.51	0.573333	8	14	10	13	9	8	10	10.6667	-0.135977	0.816874	0.999443
107984025	'LOC107984025'	mRNA	0.45	0.85	1.63	0.45	1.76	1.52	1.24333	0.976667	0.33	0.64	1.2	0.32	1.28	1.11	0.903333	0.723333	2	4	7	2	8	7	5.66667	4.33333	0.351623	0.688932	0.999443
107984043	'LOC107984043'	mRNA	0.35	0.26	0	0.28	0	0.07	0.116667	0.203333	0.26	0.2	0	0.2	0	0.05	0.0833333	0.153333	5	4	0	4	0	1	1.66667	3	-0.897757	0.518006	0.999443
107984124	'LOC107984124'	mRNA	0.57	0	0.59	0.56	0.55	0.54	0.55	0.386667	0.41	0	0.43	0.4	0.4	0.4	0.4	0.28	2	0	2	2	2	2	2	1.33333	0.539721	0.711833	0.999443
107984126	'LOC107984126'	mRNA	0	0	0.07	0.07	0	0	0.0233333	0.0233333	0	0	0.05	0.05	0	0	0.0166667	0.0166667	0	0	1	1	0	0	0.333333	0.333333	-0.0405185	0.99012	0.999443
107984138	'LOC107984138'	mRNA	3.88	3.25	2.86	3.33	3.32	2.79	3.14667	3.33	2.81	2.41	2.1	2.36	2.43	2.04	2.27667	2.44	109.64	94.52	80.24	96.05	96.97	82	91.6733	94.8	-0.0868437	0.674733	0.999443
107984139	'LOC107984139'	mRNA	0.26	0	0	0	0	0	0	0.0866667	0.19	0	0	0	0	0	0	0.0633333	3	0	0	0	0	0	0	1	-2.4794	0.403153	0.999443
107984153	'LOC107984153'	mRNA	0.03	0.01	0	0	0	0	0	0.0133333	0.02	0.01	0	0	0	0	0	0.01	0.85	0.44	0	0	0	0	0	0.43
107984156	'LOC107984156'	mRNA	0.32	0.19	0.96	0	0	0.53	0.176667	0.49	0.23	0.14	0.7	0	0	0.39	0.13	0.356667	4.18	2.38	10.62	0	0	6.59	2.19667	5.72667	-1.45276	0.220198	0.999443
107984203	'LOC107984203'	mRNA	12.63	9.3	11.74	15.77	11.7	12.1	13.19	11.2233	9.16	6.91	8.62	11.17	8.55	8.85	9.52333	8.23	383	300	353	488	366	381	411.667	345.333	0.209569	0.109663	0.999443
107984345	'SMIM38'	mRNA	0.09	0.08	0	0	0.04	0	0.0133333	0.0566667	0.06	0.06	0	0	0.03	0	0.01	0.04	2	2	0	0	1	0	0.333333	1.33333	-1.9283	0.382141	0.999443
107984449	'LOC107984449'	mRNA	3.25	2.99	3	4.14	2.89	2.55	3.19333	3.08	2.35	2.22	2.2	2.93	2.11	1.86	2.3	2.25667	121	110	96	124	112	92	109.333	109	-0.0370496	0.848372	0.999443
107984590	'LOC107984590'	mRNA	1.52	1.29	1.2	1.89	1.44	1	1.44333	1.33667	1.1	0.96	0.88	1.34	1.05	0.73	1.04	0.98	41	37	32	52	40	28	40	36.6667	0.0819682	0.798302	0.999443
107984638	'LOC107984638'	mRNA	0.57	1.06	0.41	0.63	0.55	0.85	0.676667	0.68	0.41	0.79	0.3	0.45	0.4	0.62	0.49	0.5	7	14	5	8	7	11	8.66667	8.66667	-0.0355503	0.956781	0.999443
107984640	'LBHD2'	mRNA	7.55	9.12	6.36	7.61	5.82	7.8	7.07667	7.67667	5.48	6.78	4.67	5.39	4.25	5.7	5.11333	5.64333	39	50	32	40	31	42	37.6667	40.3333	-0.138115	0.658787	0.999443
107984745	'LOC107984745'	mRNA	0.67	0.49	0.53	0.8	0.96	1.04	0.933333	0.563333	0.48	0.37	0.39	0.56	0.7	0.76	0.673333	0.413333	23	18	18	28	34	37	33	19.6667	0.708484	0.0590025	0.999443
107984751	'LOC107984751'	mRNA	0.03	0.03	0.02	0.04	0.01	0.04	0.03	0.0266667	0.02	0.02	0.02	0.03	0.01	0.03	0.0233333	0.02	4	4	3	6	1	5	4	3.66667	0.0799463	0.934544	0.999443
107984814	'LOC107984814'	mRNA	0.58	0.48	0.66	0.57	0.56	0.49	0.54	0.573333	0.42	0.36	0.49	0.4	0.41	0.36	0.39	0.423333	8	7	9	8	8	7	7.66667	8	-0.103354	0.875378	0.999443
107984817	'LOC107984817'	mRNA	0.92	0.43	0.58	0.34	0.63	0.44	0.47	0.643333	0.67	0.32	0.43	0.24	0.46	0.32	0.34	0.473333	24	12	15	9	17	12	12.6667	17	-0.461634	0.365982	0.999443
107984832	'LOC107984832'	mRNA	0	0	0	0	0	0.03	0.01	0	0	0	0	0	0	0.02	0.00666667	0	0	0	0	0	0	1	0.333333	0	0.92125	0.82138	0.999443
107984833	'LOC107984833'	mRNA	0.33	0.21	0.34	0.22	0.22	0.21	0.216667	0.293333	0.24	0.16	0.25	0.15	0.16	0.16	0.156667	0.216667	3	2	3	2	2	2	2	2.66667	-0.456883	0.702605	0.999443
107984841	'LOC107984841'	mRNA	2.29	2.16	2.36	4.28	2	3.73	3.33667	2.27	1.66	1.6	1.73	3.03	1.46	2.73	2.40667	1.66333	10	10	10	19	9	17	15	10	0.540971	0.319559	0.999443
107984859	'LOC107984859'	mRNA	0	0	0	0.07	0	0	0.0233333	0	0	0	0	0.05	0	0	0.0166667	0	0	0	0	1	0	0	0.333333	0	0.92125	0.82138	0.999443
107984862	'LOC107984862'	mRNA	0.16	0.1	0.05	0.15	0.05	0.18	0.126667	0.103333	0.11	0.07	0.04	0.11	0.04	0.13	0.0933333	0.0733333	6	4	2	6	2	7	5	4	0.281426	0.756477	0.999443
107984876	'LOC107984876'	mRNA	0.03	0	0	0.03	0.09	0	0.04	0.01	0.02	0	0	0.02	0.07	0	0.03	0.00666667	1	0	0	1	3	0	1.33333	0.333333	1.85959	0.405077	0.999443
107984974	'LOC107984974'	mRNA	2.02	2.23	0.58	1.7	1.58	1.74	1.67333	1.61	1.46	1.66	0.42	1.21	1.15	1.27	1.21	1.18	50	44	14	43	40	45	42.6667	36	0.209131	0.564848	0.999443
107985021	'LOC107985021'	mRNA	0.03	0	0.02	0.06	0.01	0.03	0.0333333	0.0166667	0.02	0	0.01	0.04	0.01	0.02	0.0233333	0.01	3	0	2	6	1	3	3.33333	1.66667	0.945007	0.45859	0.999443
107985082	'LOC107985082'	mRNA	3.8	4.59	4.63	5.11	4.42	4.28	4.60333	4.34	2.75	3.41	3.4	3.62	3.23	3.13	3.32667	3.18667	35	45	42	48	42	41	43.6667	40.6667	0.0611027	0.834509	0.999443
107985103	'LOC107985103'	mRNA	0	0.14	0	0.1	0.05	0.05	0.0666667	0.0466667	0	0.1	0	0.07	0.03	0.03	0.0433333	0.0333333	0	3	0	2	1	1	1.33333	1	0.378525	0.835735	0.999443
107985115	'LOC107985115'	mRNA	0.33	0.48	0.26	0.2	0.32	0.24	0.253333	0.356667	0.24	0.35	0.19	0.14	0.23	0.18	0.183333	0.26	13	20	10	8	13	10	10.3333	14.3333	-0.507052	0.355536	0.999443
107985149	'LOC107985149'	mRNA	0	0.05	0.06	0	0	0	0	0.0366667	0	0.04	0.04	0	0	0	0	0.0266667	0	1	1	0	0	0	0	0.666667	-1.90011	0.552356	0.999443
107985381	'LOC107985381'	mRNA	0.09	0.09	0	0.36	0.18	0.09	0.21	0.06	0.07	0.06	0	0.26	0.13	0.07	0.153333	0.0433333	1	1	0	4	2	1	2.33333	0.666667	1.76154	0.291761	0.999443
107985388	'LOC107985388'	mRNA	0.61	0.67	0.73	0.81	0.96	1.01	0.926667	0.67	0.44	0.5	0.53	0.57	0.7	0.74	0.67	0.49	11	13	13	15	18	19	17.3333	12.3333	0.452092	0.353063	0.999443
107985410	'LOC107985410'	mRNA	0	0	0	0	0.03	0	0.01	0	0	0	0	0	0.03	0	0.01	0	0	0	0	0	2	0	0.666667	0	1.83407	0.598566	0.999443
107985416	'LOC107985416'	mRNA	0.86	0.41	1.46	0	1.42	0.97	0.796667	0.91	0.63	0.31	1.07	0	1.04	0.71	0.583333	0.67	6	3	10	0	10	7	5.66667	6.33333	-0.192501	0.827003	0.999443
107985524	'LOC107985524'	mRNA	0.3	0.12	0.11	0.09	0.12	0.08	0.0966667	0.176667	0.22	0.09	0.08	0.06	0.09	0.06	0.07	0.13	17	7	6	5	7	5	5.66667	10	-0.857042	0.224557	0.999443
107985532	'LOC107985532'	mRNA	0.37	0.18	0.14	0.14	0.18	0.22	0.18	0.23	0.27	0.13	0.1	0.1	0.13	0.16	0.13	0.166667	8	4	3	3	4	5	4	5	-0.357881	0.686998	0.999443
107985657	'LOC107985657'	mRNA	0.04	0	0	0	0.04	0	0.0133333	0.0133333	0.03	0	0	0	0.03	0	0.01	0.01	1	0	0	0	1	0	0.333333	0.333333	-0.0405184	0.990082	0.999443
107985678	'LOC107985678'	mRNA	0.18	0.13	0.23	0.14	0.09	0.13	0.12	0.18	0.13	0.1	0.17	0.1	0.07	0.1	0.09	0.133333	4	3	5	3	2	3	2.66667	4	-0.628925	0.535383	0.999443
107985687	'LOC107985687'	mRNA	0.12	0.08	0.12	0.22	0.08	0.08	0.126667	0.106667	0.09	0.06	0.09	0.15	0.06	0.06	0.09	0.08	6	4	6	11	4	4	6.33333	5.33333	0.196821	0.804281	0.999443
107985728	'LOC107985728'	mRNA	2.65	2.54	2.53	2.99	3.32	3.48	3.26333	2.57333	1.92	1.89	1.86	2.12	2.42	2.54	2.36	1.89	99	101	94	114	128	135	125.667	98	0.319833	0.0873896	0.999443
107985729	'LOC107985729'	mRNA	0	0	0	0.15	0	0	0.05	0	0	0	0	0.1	0	0	0.0333333	0	0	0	0	2	0	0	0.666667	0	1.78442	0.614213	0.999443
107985734	'LOC107985734'	mRNA	0	0	0	0.11	0	0.11	0.0733333	0	0	0	0	0.08	0	0.08	0.0533333	0	0	0	0	1.01	0	1.03	0.68	0	1.80924	0.576566	0.999443
107985798	'LOC107985798'	mRNA	0	0	0	0.12	0	0	0.04	0	0	0	0	0.09	0	0	0.03	0	0	0	0	0.78	0	0	0.26	0
107985876	'LOC107985876'	mRNA	0.15	0.04	0.06	0.04	0.06	0.06	0.0533333	0.0833333	0.11	0.03	0.04	0.03	0.04	0.04	0.0366667	0.06	8	2	3	2	3	3	2.66667	4.33333	-0.73795	0.472302	0.999443
107986035	'LOC107986035'	mRNA	9.58	13.19	9.09	11.11	14.06	12.55	12.5733	10.62	6.94	9.81	6.68	7.87	10.27	9.17	9.10333	7.81	52	76	48.16	61.4	78.69	71	70.3633	58.72	0.218005	0.393242	0.999443
107986084	'LOC107986084'	mRNA	2.47	3.19	3.25	2.16	3.11	3.17	2.81333	2.97	1.79	2.37	2.39	1.53	2.27	2.32	2.04	2.18333	27	37	35	24	35	36	31.6667	33	-0.0969711	0.777021	0.999443
107986113	'LOC107986113'	mRNA	12.84	8.82	10.72	15.63	12.15	13.08	13.62	10.7933	9.31	6.56	7.87	11.07	8.87	9.56	9.83333	7.91333	325.71	237.99	269.5	404.61	317.83	344.47	355.637	277.733	0.315105	0.0221104	0.999443
107986175	'LOC107986175'	mRNA	0	0.07	0.08	0.08	0.08	0	0.0533333	0.05	0	0.05	0.06	0.05	0.05	0	0.0333333	0.0366667	0	1	1	1	1	0	0.666667	0.666667	-0.0476527	0.983433	0.999443
107986211	'LOC107986211'	mRNA	0.32	0.31	0.29	0.22	0.29	0.23	0.246667	0.306667	0.23	0.23	0.21	0.16	0.21	0.17	0.18	0.223333	21	22	19	15	20	16	17	20.6667	-0.320265	0.458063	0.999443
107986215	'LOC107986215'	mRNA	0.06	0.22	0.06	0.06	0.06	0.11	0.0766667	0.113333	0.04	0.16	0.04	0.04	0.04	0.08	0.0533333	0.08	1	4	1	1	1	2	1.33333	2	-0.617233	0.67158	0.999443
107986244	'LOC107986244'	mRNA	0	0	0	0.29	0	0	0.0966667	0	0	0	0	0.2	0	0	0.0666667	0	0	0	0	1	0	0	0.333333	0	0.92125	0.82138	0.999443
107986531	'LOC107986531'	mRNA	0	0.08	0	0	0	0	0	0.0266667	0	0.06	0	0	0	0	0	0.02	0	1	0	0	0	0	0	0.333333	-1.0023	0.805965	0.999443
107986554	'LOC107986554'	mRNA	0	0.02	0.02	0	0	0	0	0.0133333	0	0.01	0.01	0	0	0	0	0.00666667	0	1	1	0	0	0	0	0.666667	-1.90011	0.552356	0.999443
107986596	'LOC107986596'	mRNA	0.43	0.64	0.54	0.39	0.42	0.66	0.49	0.536667	0.31	0.48	0.4	0.27	0.3	0.48	0.35	0.396667	12	19	15	11	12	19	14	15.3333	-0.168425	0.736334	0.999443
107986677	'LOC107986677'	mRNA	0	0	0	0.05	0.05	0	0.0333333	0	0	0	0	0.03	0.03	0	0.02	0	0	0	0	1	1	0	0.666667	0	1.80975	0.576396	0.999443
107986755	'LOC107986755'	mRNA	0.02	0	0.02	0.01	0	0	0.00333333	0.0133333	0.01	0	0.01	0.01	0	0	0.00333333	0.00666667	1	0	1	1	0	0	0.333333	0.666667	-0.942508	0.723054	0.999443
107986762	'LOC107986762'	mRNA	0.14	0.34	0.16	0.26	0.15	0.2	0.203333	0.213333	0.1	0.26	0.12	0.18	0.11	0.15	0.146667	0.16	3	7	3	5	3	4	4	4.33333	-0.15563	0.865356	0.999443
107986800	'LOC107986800'	mRNA	7.85	8.59	9.8	8.64	8.54	8.56	8.58	8.74667	5.69	6.38	7.19	6.12	6.24	6.25	6.20333	6.42	234.25	272.5	289.87	262.86	262.67	264.88	263.47	265.54	-0.0536513	0.686157	0.999443
107986908	'LOC107986908'	mRNA	0	0	0	0	0.03	0	0.01	0	0	0	0	0	0.02	0	0.00666667	0	0	0	0	0	1	0	0.333333	0	0.92125	0.82138	0.999443
107986910	'LOC107986910'	mRNA	0	0.17	0.1	0	0	0	0	0.09	0	0.13	0.07	0	0	0	0	0.0666667	0	1	1	0	0	0	0	0.666667	-1.90011	0.552356	0.999443
107986982	'LOC107986982'	mRNA	0	0.04	0	0	0	0	0	0.0133333	0	0.03	0	0	0	0	0	0.01	0	2	0	0	0	0	0	0.666667	-1.88386	0.588425	0.999443
107987004	'LOC107987004'	mRNA	3.03	2.17	2.14	1.82	2.42	2.3	2.18	2.44667	2.2	1.61	1.57	1.29	1.76	1.68	1.57667	1.79333	47.22	35.86	32.88	28.91	38.8	37.23	34.98	38.6533	-0.183893	0.570972	0.999443
107987067	'LOC107987067'	mRNA	0.86	0.52	0.56	0	0.54	0.77	0.436667	0.646667	0.62	0.39	0.41	0	0.4	0.56	0.32	0.473333	4.87	3.14	3.11	0	3.16	4.52	2.56	3.70667	-0.543359	0.636522	0.999443
107987099	'LOC107987099'	mRNA	0	0	0	0	0	0.04	0.0133333	0	0	0	0	0	0	0.03	0.01	0	0	0	0	0	0	1	0.333333	0	0.92125	0.82138	0.999443
107987175	'LOC107987175'	mRNA	0	0.1	0.22	0.11	0	0	0.0366667	0.106667	0	0.08	0.16	0.08	0	0	0.0266667	0.08	0	1	2	1	0	0	0.333333	1	-1.52788	0.522591	0.999443
107987211	'LOC107987211'	mRNA	0	0	0.03	0	0	0	0	0.01	0	0	0.02	0	0	0	0	0.00666667	0	0	1	0	0	0	0	0.333333	-1.0023	0.805965	0.999443
107987237	'LOC107987237'	mRNA	0.11	0.05	0.06	0.32	0.11	0.1	0.176667	0.0733333	0.08	0.04	0.04	0.23	0.08	0.08	0.13	0.0533333	2	1	1	6	2	2	3.33333	1.33333	1.27116	0.322462	0.999443
107987238	'LOC107987238'	mRNA	0	0.38	0	0	0	0	0	0.126667	0	0.28	0	0	0	0	0	0.0933333	0	2	0	0	0	0	0	0.666667	-1.88386	0.588425	0.999443
107987243	'LOC107987243'	mRNA	0.18	0.17	0.36	0.09	0.17	0.25	0.17	0.236667	0.13	0.12	0.26	0.06	0.12	0.19	0.123333	0.17	2	2	4	1	2	3	2	2.66667	-0.453541	0.709063	0.999443
107987248	'LOC107987248'	mRNA	0.69	0.43	0	0.23	1.11	0.66	0.666667	0.373333	0.5	0.32	0	0.16	0.81	0.48	0.483333	0.273333	3	2	0	1	5	3	3	1.66667	0.82218	0.526415	0.999443
107987254	'LOC107987254'	mRNA	0.11	0.04	0	0.11	0	0.22	0.11	0.05	0.08	0.03	0	0.08	0	0.16	0.08	0.0366667	2	1	0	1	0	3	1.33333	1	0.382936	0.83347	0.999443
107987269	'LOC107987269'	mRNA	0.15	0	0	0	0	0.08	0.0266667	0.05	0.11	0	0	0	0	0.05	0.0166667	0.0366667	2.4	0	0	0	0	1.28	0.426667	0.8	-0.933129	0.740885	0.999443
107987276	'LOC107987276'	mRNA	15.37	17.37	20.93	18.19	18.15	16.49	17.61	17.89	11.14	12.91	15.36	12.88	13.25	12.05	12.7267	13.1367	392.2	471.42	529.22	473.52	477.64	436.77	462.643	464.28	-0.0479336	0.689713	0.999443
107987285	'LOC107987285'	mRNA	0	0	0.03	0	0.03	0	0.01	0.01	0	0	0.02	0	0.02	0	0.00666667	0.00666667	0	0	1	0	1	0	0.333333	0.333333	-0.0405184	0.99005	0.999443
107987288	'LOC107987288'	mRNA	1.53	1.61	0.66	1.32	1.4	1.34	1.35333	1.26667	1.11	1.19	0.49	0.94	1.03	0.98	0.983333	0.93	12.88	14.35	5.48	11.34	12.18	11.76	11.76	10.9033	0.0969343	0.868142	0.999443
107987289	'LOC107987289'	mRNA	0.86	0.75	0.63	0.63	0.91	1.06	0.866667	0.746667	0.63	0.56	0.46	0.45	0.66	0.77	0.626667	0.55	45.12	41.65	32.52	33.66	48.82	57.24	46.5733	39.7633	0.190381	0.539367	0.999443
107987290	'LOC107987290'	mRNA	4.14	3.41	2.56	4.45	3.19	5.29	4.31	3.37	3	2.53	1.88	3.15	2.33	3.87	3.11667	2.47	26.89	23.5	16.28	29.39	21.36	35.77	28.84	22.2233	0.347761	0.374309	0.999443
107987363	'LOC107987363'	mRNA	0.06	0.21	0.06	0.11	0.06	0.11	0.0933333	0.11	0.04	0.16	0.04	0.08	0.04	0.08	0.0666667	0.08	1	4	1	2	1	2.04	1.68	2	-0.300448	0.827827	0.999443
107987364	'LOC107987364'	mRNA	3.49	2.73	3.69	2.63	2.96	3.02	2.87	3.30333	2.53	2.03	2.71	1.86	2.16	2.21	2.07667	2.42333	46.91	39	49.01	36.09	41.04	42.25	39.7933	44.9733	-0.211538	0.471716	0.999443
107987372	'LOC107987372'	mRNA	1.46	0.76	1.49	1.27	0.63	1.71	1.20333	1.23667	1.06	0.57	1.1	0.9	0.46	1.25	0.87	0.91	9	5	9	8	4	10.96	7.65333	7.66667	-0.107706	0.877079	0.999443
107987373	'LOC107987373'	mRNA	0	2.03	0.73	2.62	1.23	2.1	1.98333	0.92	0	1.51	0.53	1.85	0.89	1.54	1.42667	0.68	0	11.19	3.69	13.83	6.56	11.39	10.5933	4.96	1.05997	0.196291	0.999443
107987388	'LOC107987388'	mRNA	0.04	0	0	0	0	0	0	0.0133333	0.03	0	0	0	0	0	0	0.01	1	0	0	0	0	0	0	0.333333	-1.0023	0.805965	0.999443
107987423	'LOC107987423'	mRNA	0	0	0.09	0.09	0	0.09	0.06	0.03	0	0	0.07	0.06	0	0.06	0.04	0.0233333	0	0	1	1	0	1	0.666667	0.333333	0.84846	0.750029	0.999443
107987432	'LOC107987432'	mRNA	0	0.02	0	0	0.03	0.03	0.02	0.00666667	0	0.02	0	0	0.02	0.02	0.0133333	0.00666667	0	0.5	0	0	0.5	0.5	0.333333	0.166667
107987433	'LOC107987433'	mRNA	0	0	0	0	0	0.03	0.01	0	0	0	0	0	0	0.02	0.00666667	0	0	0	0	0	0	1	0.333333	0	0.92125	0.82138	0.999443
107987457	'LOC107987457'	mRNA	0.45	0.57	0.45	0.38	0.19	0.29	0.286667	0.49	0.33	0.42	0.33	0.27	0.14	0.21	0.206667	0.36	12.83	17.18	12.59	11.04	5.57	8.55	8.38667	14.2	-0.815739	0.162553	0.999443
107987464	'LOC107987464'	mRNA	0.03	0.01	0.05	0	0	0	0	0.03	0.02	0.01	0.03	0	0	0	0	0.02	0.85	0.44	1.25	0	0	0	0	0.846667	-1.0023	0.805965	0.999443
107987477	'LOC107987477'	mRNA	0.03	0.01	0	0	0	0	0	0.0133333	0.02	0.01	0	0	0	0	0	0.01	0.85	0.44	0	0	0	0	0	0.43
107987478	'LOC107987478'	mRNA	0	0	0.08	0	0.04	0.06	0.0333333	0.0266667	0	0	0.06	0	0.03	0.04	0.0233333	0.02	0	0	1.24	0	0.73	0.97	0.566667	0.413333	-1.0023	0.805965	0.999443
107987479	'LOC107987479'	mRNA	0	0	0.08	0	0.04	0.06	0.0333333	0.0266667	0	0	0.06	0	0.03	0.04	0.0233333	0.02	0	0	1.24	0	0.73	0.97	0.566667	0.413333	-1.0023	0.805965	0.999443
10799	'RPP40'	mRNA	14.54	12.04	14.65	17.33	9.85	10.38	12.52	13.7433	10.54	8.95	10.75	12.28	7.19	7.59	9.02	10.08	135	124	129	156	89	104	116.333	129.333	-0.198178	0.323825	0.999443
108	'ADCY2'	mRNA	0.03	0	0	0	0	0	0	0.01	0.02	0	0	0	0	0	0	0.00666667	1	0	0	0	0	0	0	0.333333	-1.0023	0.805965	0.999443
1080	'CFTR'	mRNA	0	0.01	0.02	0	0	0.05	0.0166667	0.01	0	0.01	0.01	0	0	0.03	0.01	0.00666667	0	1	1	0	0	3	1	0.666667	0.556435	0.801711	0.999443
10800	'CYSLTR1'	mRNA	0	0.04	0	0	0	0	0	0.0133333	0	0.03	0	0	0	0	0	0.01	0	1	0	0	0	0	0	0.333333	-1.0023	0.805965	0.999443
10801	'SEPTIN9'	mRNA	188.91	207.59	177.96	198.54	199.07	202.25	199.953	191.487	136.98	154.34	130.66	140.61	145.37	147.85	144.61	140.66	7415	8644	6877	7940	8052	8231	8074.33	7645.33	0.0401443	0.602993	0.999443
10802	'SEC24A'	mRNA	18.13	14.05	19.47	16.92	15.43	13.14	15.1633	17.2167	13.14	10.45	14.29	11.98	11.27	9.6	10.95	12.6267	900	683	918	832	739	716	762.333	833.667	-0.172428	0.125829	0.999443
10806	'SDCCAG8'	mRNA	13.22	14.23	12.93	14	13.98	15.21	14.3967	13.46	9.58	10.58	9.49	9.91	10.21	11.12	10.4133	9.88333	299	345	292	313	324	353	330	312	0.0419404	0.734354	0.999443
10807	'ENTR1'	mRNA	74.44	75.77	64.67	71.23	69.77	72.71	71.2367	71.6267	53.97	56.33	47.48	50.45	50.95	53.15	51.5167	52.5933	1630	1763	1408	1592	1580	1654	1608.67	1600.33	-0.0313884	0.710451	0.999443
10808	'HSPH1'	mRNA	35.21	32.15	36.36	38.5	30.43	31.65	33.5267	34.5733	25.53	23.9	26.7	27.27	22.22	23.14	24.21	25.3767	1190	1173	1239	1347	1058	1104	1169.67	1200.67	-0.0810137	0.368263	0.999443
10809	'STARD10'	mRNA	7.98	9.48	9.34	8.65	9.88	10.41	9.64667	8.93333	5.79	7.05	6.85	6.12	7.21	7.61	6.98	6.56333	152	192	176	168	194	206	189.333	173.333	0.0887381	0.578319	0.999443
1081	'CGA'	mRNA	453.22	445.63	526.95	426.73	472.84	490.73	463.433	475.267	328.62	331.32	386.89	302.21	345.28	358.73	335.407	348.943	2231	2327	2525	2136	2399	2518	2351	2361	-0.0454628	0.601917	0.999443
10810	'WASF3'	mRNA	0.02	0.02	0.06	0.02	0.04	0.06	0.04	0.0333333	0.01	0.01	0.04	0.01	0.03	0.04	0.0266667	0.02	1	1	3	1	2	3	2	1.66667	0.223552	0.870556	0.999443
10811	'NOXA1'	mRNA	4.3	5.02	3.01	4.75	4.54	4.67	4.65333	4.11	3.12	3.73	2.21	3.37	3.32	3.42	3.37	3.02	64	79	44	71	69	71	70.3333	62.3333	0.136092	0.587741	0.999443
10813	'UTP14A'	mRNA	39.8	35.72	35.62	48.52	42.97	45.14	45.5433	37.0467	28.86	26.56	26.15	34.36	31.38	33	32.9133	27.19	991.74	946.06	884.91	1229.88	1104.04	1166.8	1166.91	940.903	0.269907	0.000938	0.333205
10815	'CPLX1'	mRNA	1.71	2.03	1.58	2.02	2.04	1.41	1.82333	1.77333	1.24	1.51	1.16	1.43	1.49	1.03	1.31667	1.30333	35	44	32	42	43	30	38.3333	37	0.0107199	0.972917	0.999443
10817	'FRS3'	mRNA	4.9	5.15	4.27	5.05	4.88	5.3	5.07667	4.77333	3.55	3.83	3.14	3.57	3.57	3.88	3.67333	3.50667	107	122	93	114	112	118	114.667	107.333	0.0560966	0.765601	0.999443
10818	'FRS2'	mRNA	4.83	3.42	5.18	4.73	4.21	4.03	4.32333	4.47667	3.5	2.54	3.8	3.35	3.07	2.95	3.12333	3.28	348	262	371	348	312	301	320.333	327	-0.0730435	0.598705	0.999443
1082	'CGB3'	mRNA	0.14	0.45	0.44	0.21	0.19	0.18	0.193333	0.343333	0.1	0.33	0.33	0.15	0.14	0.13	0.14	0.253333	1	3.43	3.14	1.58	1.42	1.36	1.45333	2.52333	-1.26383	0.391462	0.999443
10825	'NEU3'	mRNA	7	5.46	5.84	5.8	6.35	6.76	6.30333	6.1	5.07	4.06	4.29	4.11	4.64	4.94	4.56333	4.47333	357	364	360	332	355	335	340.667	360.333	-0.121027	0.287261	0.999443
10826	'FAXDC2'	mRNA	0.04	0.09	0.1	0.08	0.08	0.06	0.0733333	0.0766667	0.03	0.07	0.07	0.05	0.06	0.05	0.0533333	0.0566667	2	5	3	4	4	3	3.66667	3.33333	0.0977519	0.921365	0.999443
10827	'FAM114A2'	mRNA	5.63	5.32	5.22	7.22	6.24	6.32	6.59333	5.39	4.08	3.96	3.83	5.11	4.56	4.62	4.76333	3.95667	196	195	172	245	216	228	229.667	187.667	0.250604	0.0755148	0.999443
10838	'ZNF275'	mRNA	2.09	1.51	1.92	2.48	1.95	2	2.14333	1.84	1.51	1.12	1.41	1.75	1.43	1.46	1.54667	1.34667	142	109	130	172	137	141	150	127	0.19714	0.264749	0.999443
10840	'ALDH1L1'	mRNA	0	0.03	0	0	0	0	0	0.01	0	0.03	0	0	0	0	0	0.01	0	1	0	0	0	0	0	0.333333	-1.0023	0.805965	0.999443
10841	'FTCD'	mRNA	0.14	0.3	0.32	0.22	0.13	0.34	0.23	0.253333	0.1	0.22	0.23	0.15	0.1	0.25	0.166667	0.183333	3	8	8	4	3	8	5	6.33333	-0.380078	0.639533	0.999443
10844	'TUBGCP2'	mRNA	44.63	47.87	44.37	50.72	46.55	46.01	47.76	45.6233	32.36	35.59	32.58	35.92	33.99	33.64	34.5167	33.51	1832	2088	1803	2112	1960	1952	2008	1907.67	0.0334579	0.655016	0.999443
10845	'CLPX'	mRNA	11.61	10.11	11.74	12.22	12.32	10.77	11.77	11.1533	8.42	7.52	8.62	8.65	9	7.87	8.50667	8.18667	553	510	551	589	590	535	571.333	538	0.0455405	0.645754	0.999443
10846	'PDE10A'	mRNA	8.84	8.16	7.77	9.02	8.49	8.81	8.77333	8.25667	6.41	6.06	5.71	6.39	6.2	6.44	6.34333	6.06	649	625	584	666	628	669	654.333	619.333	0.0390213	0.673888	0.999443
10847	'SRCAP'	mRNA	17.13	16.18	16.32	18.58	17.53	16.62	17.5767	16.5433	12.42	12.03	11.98	13.16	12.8	12.15	12.7033	12.1433	2170	2182	2056	2402	2291	2184	2292.33	2136	0.061083	0.364154	0.999443
10848	'PPP1R13L'	mRNA	40.35	45.65	40.22	40.41	43.82	43.03	42.42	42.0733	29.26	33.94	29.53	28.62	32	31.45	30.69	30.91	1285	1533	1269	1301	1413	1399	1371	1362.33	-0.0293512	0.741497	0.999443
10849	'POLR1G'	mRNA	6.85	7.38	6.27	7.71	5.88	6.84	6.81	6.83333	4.97	5.49	4.6	5.46	4.29	5	4.91667	5.02	194	222	176	223	172	201	198.667	197.333	-0.0313922	0.836415	0.999443
10850	'CCL27'	mRNA	0	0.55	0	0	0	0	0	0.183333	0	0.41	0	0	0	0	0	0.136667	0	1	0	0	0	0	0	0.333333	-1.0023	0.805965	0.999443
10855	'HPSE'	mRNA	4.61	3.68	4.34	4.15	3.98	3.9	4.01	4.21	3.34	2.74	3.19	2.94	2.91	2.85	2.9	3.09	220	187	206	202	196	193	197	204.333	-0.0938062	0.515143	0.999443
10856	'RUVBL2'	mRNA	149.7	177.95	144.61	159.85	157.08	152.63	156.52	157.42	108.54	132.3	106.17	113.21	114.71	111.57	113.163	115.67	2143	2713	2046	2337	2321	2282	2313.33	2300.67	-0.0309962	0.732578	0.999443
10857	'PGRMC1'	mRNA	73.54	60.94	77.56	71.33	67.2	67.28	68.6033	70.68	53.32	45.31	56.94	50.52	49.07	49.18	49.59	51.8567	1305	1151	1361	1295	1230	1242	1255.67	1272.33	-0.0608127	0.477981	0.999443
10858	'CYP46A1'	mRNA	0.05	0	0.06	0	0	0.05	0.0166667	0.0366667	0.03	0	0.05	0	0	0.03	0.01	0.0266667	1	0	1	0	0	1	0.333333	0.666667	-0.942485	0.722017	0.999443
10861	'SLC26A1'	mRNA	0.1	0.03	0.11	0.06	0.4	0.2	0.22	0.08	0.08	0.02	0.08	0.04	0.29	0.15	0.16	0.06	1	1	1	2	4	2	2.66667	1	1.37807	0.333684	0.999443
10863	'ADAM28'	mRNA	0.14	0.04	0	0	0.09	0.01	0.0333333	0.06	0.1	0.03	0	0	0.07	0.01	0.0266667	0.0433333	4	2	0	0	6	1	2.33333	2	0.202192	0.88824	0.999443
10865	'ARID5A'	mRNA	5.96	7.5	5.98	3.87	4.31	4.56	4.24667	6.48	4.32	5.58	4.39	2.74	3.15	3.34	3.07667	4.76333	123	172	123	85	93	102	93.3333	139.333	-0.615944	0.00180553	0.522802
10867	'TSPAN9'	mRNA	3.02	2.78	2.44	2.56	2.4	2.56	2.50667	2.74667	2.19	2.07	1.79	1.81	1.75	1.87	1.81	2.01667	135	133	108	117	111	119	115.667	125.333	-0.155437	0.390066	0.999443
10868	'USP20'	mRNA	12.52	13.76	11.4	13.14	12.47	13.44	13.0167	12.56	9.08	10.23	8.37	9.31	9.11	9.83	9.41667	9.22667	570	663	517	613	586	635	611.333	583.333	0.028428	0.785498	0.999443
10869	'USP19'	mRNA	35.84	36.63	33.09	39.29	37.39	37.34	38.0067	35.1867	25.99	27.23	24.29	27.83	27.31	27.29	27.4767	25.8367	1742	1909	1581	1935	1893	1907	1911.67	1744	0.0929178	0.229465	0.999443
10870	'HCST'	mRNA	1.62	0	0	0.47	0.88	0.54	0.63	0.54	1.17	0	0	0.33	0.64	0.4	0.456667	0.39	5	0	0	1	3	3	2.33333	1.66667	0.455897	0.755959	0.999443
10873	'ME3'	mRNA	27.45	25.63	24.71	26.28	26.11	28.85	27.08	25.93	19.91	19.05	18.14	18.61	19.06	21.09	19.5867	19.0333	602	597	539	592	589	662	614.333	579.333	0.0453206	0.649486	0.999443
10874	'NMU'	mRNA	0.49	0	0.44	0.21	0.81	0.41	0.476667	0.31	0.36	0	0.32	0.15	0.59	0.3	0.346667	0.226667	3	0	2	1	4	2	2.33333	1.66667	0.449046	0.743342	0.999443
1088	'CEACAM8'	mRNA	0	0	0	0.04	0	0	0.0133333	0	0	0	0	0.03	0	0	0.01	0	0	0	0	1	0	0	0.333333	0	0.92125	0.82138	0.999443
10882	'C1QL1'	mRNA	68.87	80.08	69.45	65.58	66.03	67.19	66.2667	72.8	49.94	59.54	50.99	46.45	48.21	49.12	47.9267	53.49	961	1188	957	933	950	974	952.333	1035.33	-0.15951	0.0918902	0.999443
10884	'MRPS30'	mRNA	166.63	143.54	174.64	173.68	176.37	151.47	167.173	161.603	120.82	106.72	128.22	123	128.79	110.73	120.84	118.587	2548	2334	2639	2708	2781	2406	2631.67	2507	0.028458	0.721962	0.999443
10885	'WDR3'	mRNA	9.76	7.23	9	9.17	7.73	8.1	8.33333	8.66333	7.08	5.38	6.6	6.5	5.64	5.92	6.02	6.35333	1051	829	963	1008	858	905	923.667	947.667	-0.0795106	0.423622	0.999443
10886	'NPFFR2'	mRNA	0	0	0	0.09	0	0	0.03	0	0	0	0	0.06	0	0	0.02	0	0	0	0	1	0	0	0.333333	0	0.92125	0.82138	0.999443
10887	'PROKR1'	mRNA	0	0	0	0	0.02	0	0.00666667	0	0	0	0	0	0.02	0	0.00666667	0	0	0	0	0	1	0	0.333333	0	0.92125	0.82138	0.999443
10888	'GPR83'	mRNA	0	0.04	0	0.07	0.05	0	0.04	0.0133333	0	0.03	0	0.05	0.03	0	0.0266667	0.01	0	2	0	3	2	0	1.66667	0.666667	1.27931	0.512445	0.999443
10890	'RAB10'	mRNA	53.1	44.62	54.81	56.18	49.2	48.37	51.25	50.8433	38.5	33.17	40.24	39.79	35.93	35.36	37.0267	37.3033	1935	1730	1982	2089	1849	1829	1922.33	1882.33	-0.0122791	0.879065	0.999443
10891	'PPARGC1A'	mRNA	3.78	3.42	4.99	5.16	4.06	3.5	4.24	4.06333	2.74	2.55	3.67	3.65	2.96	2.56	3.05667	2.98667	197	172	251	240	205	204	216.333	206.667	0.0219748	0.890612	0.999443
10892	'MALT1'	mRNA	14.78	12.33	13.2	15.79	15.73	15.64	15.72	13.4367	10.72	9.17	9.69	11.18	11.49	11.44	11.37	9.86	788	679	796	855	754	762	790.333	754.333	0.0248132	0.796532	0.999443
10893	'MMP24'	mRNA	1.23	1.75	1.41	1.8	1.61	1.38	1.59667	1.46333	0.89	1.3	1.03	1.28	1.17	1.01	1.15333	1.07333	55	83	62	82	75	65	74	66.6667	0.109784	0.647026	0.999443
10897	'YIF1A'	mRNA	208.36	212.07	223.33	208.57	178.37	195.39	194.11	214.587	151.08	157.67	163.97	147.71	130.25	142.83	140.263	157.573	1894	2053	1993	1937	1674	1847	1819.33	1980	-0.163507	0.0285985	0.999443
10898	'CPSF4'	mRNA	30.08	33.22	29.09	36.28	32.57	36.02	34.9567	30.7967	21.81	24.7	21.36	25.69	23.78	26.33	25.2667	22.6233	560	664	532	690	612	696	666	585.333	0.146357	0.157848	0.999443
10899	'JTB'	mRNA	244.67	240.58	222.85	252.83	255.22	253.18	253.743	236.033	177.4	178.86	163.62	179.06	186.37	185.08	183.503	173.293	2727	2850	2448	2872	2933	2933	2912.67	2675	0.0836185	0.243547	0.999443
109	'ADCY3'	mRNA	34.63	35.93	34.46	38.78	37.43	36.96	37.7233	35.0067	25.11	26.71	25.3	27.46	27.33	27.02	27.27	25.7067	1782	1965	1738	2008	1951	1964	1974.33	1828.33	0.0708136	0.323595	0.999443
10900	'RUNDC3A'	mRNA	0.22	0.2	0.22	0.2	0.1	0.27	0.19	0.213333	0.16	0.15	0.16	0.14	0.07	0.2	0.136667	0.156667	4	4	4	4	2	5	3.66667	4	-0.167166	0.859617	0.999443
10901	'DHRS4'	mRNA	44.88	45.49	45.89	39.66	48.46	45.38	44.5	45.42	32.54	33.82	33.69	28.09	35.39	33.17	32.2167	33.35	279.57	320.61	259.99	271.77	305.67	296.43	291.29	286.723	-0.0151562	0.907196	0.999443
10902	'BRD8'	mRNA	55.36	52.73	52.4	58.77	55.17	58.14	57.36	53.4967	40.14	39.2	38.47	41.62	40.29	42.5	41.47	39.27	1735	1761	1630	1888	1791	1899	1859.33	1708.67	0.0817148	0.247236	0.999443
10903	'MTMR11'	mRNA	4.87	5.35	5.37	4.25	4.78	6.18	5.07	5.19667	3.53	3.98	3.95	3.01	3.49	4.51	3.67	3.82	134	164	157	130	145	181	152	151.667	-0.0352522	0.842283	0.999443
10904	'BLCAP'	mRNA	88.46	76.43	86.83	89.39	83.61	79.34	84.1133	83.9067	64.14	56.83	63.75	63.31	61.06	58	60.79	61.5733	1722	1584	1674	1778	1679	1607	1688	1660	-0.0173706	0.814808	0.999443
10905	'MAN1A2'	mRNA	8.76	4.99	8.49	8.65	7.45	7.02	7.70667	7.41333	6.35	3.71	6.23	6.13	5.44	5.13	5.56667	5.43	603	445	614	607	510	540	552.333	554	-0.04789	0.698453	0.999443
10906	'TRAFD1'	mRNA	64.58	62.28	59.14	66.94	63.12	65.65	65.2367	62	46.82	46.3	43.42	47.4	46.09	47.99	47.16	45.5133	1731	1774	1577	1827	1741	1814	1794	1694	0.042736	0.555683	0.999443
10907	'TXNL4A'	mRNA	25.73	25.55	25.31	24.54	25.15	26.25	25.3133	25.53	18.66	19	18.58	17.38	18.37	19.19	18.3133	18.7467	918	970	894	893.01	926.38	972	930.463	927.333	-0.0347128	0.684715	0.999443
10908	'PNPLA6'	mRNA	56.32	63.11	52.91	64.21	61.18	62.24	62.5433	57.4467	40.84	46.92	38.85	45.47	44.67	45.5	45.2133	42.2033	2591	3085	2417	3016	2904	2970	2963.33	2697.67	0.0962458	0.239821	0.999443
10910	'SUGT1'	mRNA	2.39	2.23	2.72	2.4	2.18	2.07	2.21667	2.44667	1.74	1.66	2	1.7	1.59	1.51	1.6	1.8	369	366	418	377.59	347	330.95	351.847	384.333	-0.171695	0.140343	0.999443
10912	'GADD45G'	mRNA	0	0	0.13	0	0	0	0	0.0433333	0	0	0.1	0	0	0	0	0.0333333	0	0	1	0	0	0	0	0.333333	-1.0023	0.805965	0.999443
10913	'EDAR'	mRNA	0	0	0	0.02	0	0	0.00666667	0	0	0	0	0.02	0	0	0.00666667	0	0	0	0	1	0	0	0.333333	0	0.92125	0.82138	0.999443
10914	'PAPOLA'	mRNA	49.44	43.21	54.07	54.3	47.12	45.12	48.8467	48.9067	35.85	32.13	39.7	38.46	34.41	32.98	35.2833	35.8933	2292	2135	2494	2569	2255	2170	2331.33	2307	-0.0280043	0.73503	0.999443
10915	'TCERG1'	mRNA	42.01	37.11	45.12	42.32	39.57	38.36	40.0833	41.4133	30.46	27.59	33.13	29.97	28.89	28.04	28.9667	30.3933	1808	1675	1907	1847	1713	1696	1752	1796.67	-0.0783578	0.313777	0.999443
10916	'MAGED2'	mRNA	88.52	87.13	82.95	92.51	82.15	85.02	86.56	86.2	64.18	64.78	60.9	65.51	59.99	62.15	62.55	63.2867	1794	1865	1657	1911	1713	1784	1802.67	1772	-0.0159659	0.826849	0.999443
10919	'EHMT2'	mRNA	61.65	64.03	60.42	65.36	66.24	66.8	66.1333	62.0333	44.7	47.61	44.36	46.29	48.37	48.83	47.83	45.5567	2535	2801	2472	2750	2810	2854	2804.67	2602.67	0.0685066	0.334454	0.999443
10920	'COPS8'	mRNA	15.97	14.67	18.49	17.93	16.26	15.18	16.4567	16.3767	11.58	10.9	13.57	12.7	11.87	11.1	11.89	12.0167	504	481	557	549	493	468	503.333	514	-0.0727988	0.493957	0.999443
10921	'RNPS1'	mRNA	194.6	216.03	192.23	175.49	216.46	207.23	199.727	200.953	141.1	160.62	141.14	124.28	158.07	151.49	144.613	147.62	3492	4075	3425	3240	4031	3882	3717.67	3664	-0.0159265	0.865238	0.999443
10922	'FASTK'	mRNA	65.83	72	62.61	70.05	68.19	72.9	70.38	66.8133	47.73	53.53	45.97	49.61	49.79	53.29	50.8967	49.0767	1145	1324	1086	1232	1219	1305	1252	1185	0.040276	0.644604	0.999443
10923	'SUB1'	mRNA	74.49	61.39	86.94	75.63	69.84	66.76	70.7433	74.2733	54.01	45.64	63.83	53.56	51	48.81	51.1233	54.4933	2623	2300	3037	2717	2536	2439	2564	2653.33	-0.092609	0.323857	0.999443
10924	'SMPDL3A'	mRNA	11.36	9.12	13.21	16.38	14.51	12.41	14.4333	11.23	8.24	6.78	9.7	11.6	10.59	9.07	10.42	8.24	194	168	225	284	255	218	252.333	195.667	0.323301	0.0344296	0.999443
10926	'DBF4'	mRNA	9.34	7.96	10.68	10.8	9.51	9.62	9.97667	9.32667	6.77	5.92	7.84	7.65	6.94	7.03	7.20667	6.84333	349	315	395	410	365	373	382.667	353	0.0738226	0.542245	0.999443
10927	'SPIN1'	mRNA	25.64	19.98	27.52	27.85	25.49	21.87	25.07	24.38	18.59	14.86	20.2	19.73	18.61	15.98	18.1067	17.8833	1189	986	1267	1318	1219	1052	1196.33	1147.33	0.0168391	0.871806	0.999443
10928	'RALBP1'	mRNA	29.81	26.63	27.06	29.39	28.03	27.69	28.37	27.8333	21.62	19.8	19.87	20.81	20.47	20.24	20.5067	20.43	1356	1289	1222	1364	1315	1307	1328.67	1289	0.00327832	0.965426	0.999443
10929	'SRSF8'	mRNA	10.75	10.62	10.19	11.88	12	12.02	11.9667	10.52	7.79	7.89	7.48	8.41	8.76	8.79	8.65333	7.72	476	500	449	537	547	551	545	475	0.158628	0.111308	0.999443
10933	'MORF4L1'	mRNA	253.98	223.6	229.9	270.59	245.95	243.02	253.187	235.827	184.16	166.25	168.8	191.64	179.6	177.65	182.963	173.07	5102	4778	4774	5543	5071	5063	5225.67	4884.67	0.0559841	0.371434	0.999443
10935	'PRDX3'	mRNA	153.54	123.37	149.71	149.77	134.97	136.27	140.337	142.207	111.33	91.72	109.92	106.07	98.56	99.61	101.413	104.323	2185	1868	2103	2173	1981	2015	2056.33	2052	-0.0388678	0.622113	0.999443
10936	'GPR75'	mRNA	0.54	0.6	1.1	1.26	0.58	0.62	0.82	0.746667	0.39	0.45	0.81	0.89	0.42	0.45	0.586667	0.55	11	13	22	26	12	13	17	15.3333	0.0984806	0.844281	0.999443
10938	'EHD1'	mRNA	29.03	30.05	29.97	33.19	30.61	29.24	31.0133	29.6833	21.05	22.34	22	23.51	22.35	21.38	22.4133	21.7967	1067	1221	1108	1257	1164	1131	1184	1132	0.023833	0.770198	0.999443
10939	'AFG3L2'	mRNA	44.83	41.74	42.44	47.95	40.63	42.38	43.6533	43.0033	32.5	31.03	31.16	33.96	29.67	30.98	31.5367	31.5633	1422	1408	1339	1557	1330	1396	1427.67	1389.67	-0.00265518	0.972502	0.999443
10940	'POP1'	mRNA	15.12	14.65	13.71	17.96	11.57	12.7	14.0767	14.4933	10.96	10.89	10.07	12.72	8.45	9.28	10.15	10.64	475	487	435	544	394	439	459	465.667	-0.06347	0.587502	0.999443
10942	'PRSS21'	mRNA	157.45	161.82	159.33	156.66	155.01	157.21	156.293	159.533	114.16	120.31	116.98	110.95	113.2	114.92	113.023	117.15	1422	1576	1391	1434	1431	1471	1445.33	1463	-0.0571479	0.458046	0.999443
10943	'MSL3'	mRNA	18.81	17.64	19.38	19.28	19.27	17.03	18.5267	18.61	13.64	13.12	14.23	13.65	14.07	12.45	13.39	13.6633	476	478	484	494	503	447	481.333	479.333	-0.0348535	0.733513	0.999443
10944	'C11orf58'	mRNA	39.1	34.01	35.7	42.83	36.41	37.21	38.8167	36.27	28.35	25.29	26.21	30.33	26.59	27.2	28.04	26.6167	1593	1469.39	1437.87	1778.96	1529.47	1570.02	1626.15	1500.09	0.074657	0.340028	0.999443
10945	'KDELR1'	mRNA	153.01	135.64	176.44	150.84	154.47	144.98	150.097	155.03	110.95	100.84	129.54	106.83	112.8	105.99	108.54	113.777	2174	2049	2476	2185	2263	2140	2196	2233	-0.0655768	0.43772	0.999443
10946	'SF3A3'	mRNA	108.59	96.24	101.93	109.19	98.86	97.69	101.913	102.253	78.74	71.55	74.84	77.33	72.19	71.41	73.6433	75.0433	3006	2838	2797	3086	2823	2805	2904.67	2880.33	-0.0291566	0.659571	0.999443
10947	'AP3M2'	mRNA	8	7.24	8.47	8.02	7.77	7.92	7.90333	7.90333	5.8	5.38	6.22	5.68	5.67	5.79	5.71333	5.8	287	275	301	296	287	295	292.667	287.667	-0.0161508	0.895228	0.999443
10948	'STARD3'	mRNA	23.58	25.05	26.95	28.85	26.52	27.31	27.56	25.1933	17.09	18.62	19.79	20.43	19.37	19.97	19.9233	18.5	656	740	743	818	761	787	788.667	713	0.104362	0.252136	0.999443
10949	'HNRNPA0'	mRNA	27.14	28.41	28.4	27.47	25.51	28.87	27.2833	27.9833	19.68	21.12	20.85	19.46	18.63	21.1	19.73	20.55	2535	2824	2637	2619	2457	2797	2624.33	2665.33	-0.0624045	0.404575	0.999443
10950	'BTG3'	mRNA	70.21	59.88	66.7	66.66	64.66	63.34	64.8867	65.5967	50.91	44.52	48.97	47.21	47.22	46.3	46.91	48.1333	909	826	858	885	866	853	868	864.333	-0.0346996	0.682651	0.999443
109504726	'ERV3-1-ZNF117'	mRNA	0.07	0.03	0	0	0.01	0.03	0.0133333	0.0333333	0.05	0.02	0	0	0.01	0.02	0.01	0.0233333	5.87	3	0	0	1	2.65	1.21667	2.95667	-1.43862	0.353025	0.999443
10951	'CBX1'	mRNA	76.99	70.2	82.41	81.53	71.25	74.64	75.8067	76.5333	55.83	52.19	60.5	57.74	52.03	54.56	54.7767	56.1733	1637	1590	1738	1769	1562	1645	1658.67	1655	-0.0388527	0.612452	0.999443
10952	'SEC61B'	mRNA	393.89	353.41	376.32	368.39	350.35	340.54	353.093	374.54	285.6	262.75	276.29	260.9	255.83	248.94	255.223	274.88	1304	1239	1200	1238	1195	1178	1203.67	1247.67	-0.0923993	0.224275	0.999443
10953	'TOMM34'	mRNA	120.72	129.41	125.28	118.67	102.85	114.11	111.877	125.137	87.53	96.21	91.98	84.04	75.1	83.42	80.8533	91.9067	2285	2606	2345	2293	2009	2243	2181.67	2412	-0.185557	0.0146039	0.999443
10954	'PDIA5'	mRNA	49.89	52.19	46.5	50.38	54.77	59.13	54.76	49.5267	36.17	38.8	34.14	35.68	39.99	43.22	39.63	36.37	871	969	803	897	986	1072	985	881	0.123111	0.213045	0.999443
10955	'SERINC3'	mRNA	81.2	62.57	90.49	82.37	78.02	72.35	77.58	78.0867	58.87	46.52	66.44	58.34	56.97	52.89	56.0667	57.2767	2541	2107	2788	2603	2521	2342	2488.67	2478.67	-0.0370255	0.696385	0.999443
10956	'OS9'	mRNA	143.5	152.15	136.86	156.71	158.59	159.54	158.28	144.17	104.05	113.12	100.48	110.98	115.81	116.63	114.473	105.883	3809	4291	3603	4228	4338	4394	4320	3901	0.108259	0.137654	0.999443
10957	'PNRC1'	mRNA	47.38	44.17	45.81	51.69	50.07	47.63	49.7967	45.7867	34.35	32.84	33.63	36.61	36.56	34.82	35.9967	33.6067	957	949	916	1065	1043	999	1035.67	940.667	0.0981749	0.216524	0.999443
10959	'TMED2'	mRNA	118.9	97.03	119.9	121.77	109.91	100.97	110.883	111.943	86.21	72.14	88.03	86.24	80.26	73.81	80.1033	82.1267	2996	2601	2994	3130	2856	2641	2875.67	2863.67	-0.0366658	0.65125	0.999443
10960	'LMAN2'	mRNA	261.18	277.04	263.73	285.55	271.99	273.36	276.967	267.317	189.38	205.97	193.64	202.23	198.62	199.83	200.227	196.33	3887	4384	3878	4333	4174	4226	4244.33	4049.67	0.0276665	0.677386	0.999443
10961	'ERP29'	mRNA	370.22	388.32	349.61	381.69	407.2	406.5	398.463	369.383	268.44	288.71	256.68	270.32	297.35	297.16	288.277	271.277	4843	5342	4615	5100	5348	5388	5278.67	4933.33	0.0587654	0.40402	0.999443
10962	'MLLT11'	mRNA	2.37	2.72	3.54	2.96	2.33	2.2	2.49667	2.87667	1.71	2.02	2.6	2.09	1.7	1.61	1.8	2.11	58	71	86	74	59	56	63	71.6667	-0.229857	0.35037	0.999443
10963	'STIP1'	mRNA	193.29	198.27	188.81	205.77	181.82	191.41	193	193.457	140.15	147.41	138.62	145.73	132.77	139.92	139.473	142.06	4007	4372	3876	4351	3887	4120	4119.33	4085	-0.028622	0.66891	0.999443
10964	'IFI44L'	mRNA	0.14	0.12	0.33	0.13	0.13	0.25	0.17	0.196667	0.1	0.09	0.24	0.09	0.09	0.18	0.12	0.143333	7	6	8	7	5	11	7.66667	7	0.0906179	0.896222	0.999443
10965	'ACOT2'	mRNA	19.98	20.92	18.57	20.39	18.31	19.6	19.4333	19.8233	14.49	15.55	13.64	14.44	13.37	14.33	14.0467	14.56	309.79	321.79	290.65	338.6	302.4	311.24	317.413	307.41	0.00693011	0.953418	0.999443
10966	'RAB40B'	mRNA	10.34	10.81	10.22	11.31	10.01	13.13	11.4833	10.4567	7.5	8.04	7.5	8.01	7.31	9.6	8.30667	7.68	204	220	191.14	217	199	257	224.333	205.047	0.0906479	0.539039	0.999443
10969	'EBNA1BP2'	mRNA	140.14	137.03	124.96	140.44	133.77	134.21	136.14	134.043	101.61	101.88	91.75	99.46	97.68	98.11	98.4167	98.4133	1686	1754	1485	1724	1661	1679	1688	1641.67	0.000387	0.995971	0.999443
10970	'CKAP4'	mRNA	43.13	43.87	44.09	49.32	43.58	44.43	45.7767	43.6967	31.28	32.62	32.37	34.93	31.82	32.48	33.0767	32.09	1362	1474	1381	1589	1419	1456	1488	1405.67	0.0409099	0.584853	0.999443
109703458	'HTD2'	mRNA	5.33	5.15	3.9	3.82	4.95	4.22	4.33	4.79333	3.87	3.83	2.86	2.7	3.61	3.09	3.13333	3.52	173.06	179.1	126.48	127.82	167.25	142.36	145.81	159.547	-0.16958	0.347521	0.999443
10971	'YWHAQ'	mRNA	192.13	153.37	181.07	184.37	170.05	164.62	173.013	175.523	139.31	114.03	132.94	130.57	124.18	120.34	125.03	128.76	4102	3483	3828	4015	3744	3649	3802.67	3804.33	-0.0424006	0.568834	0.999443
10972	'TMED10'	mRNA	41.55	36.13	46.38	41.28	38.88	37.26	39.14	41.3533	30.13	26.86	34.06	29.23	28.39	27.24	28.2867	30.35	1766	1634	1957	1790	1704	1643	1712.33	1785.67	-0.102742	0.220082	0.999443
10973	'ASCC3'	mRNA	13.74	10.69	14.82	15.04	11.8	12.1	12.98	13.0833	9.96	7.95	10.88	10.65	8.61	8.85	9.37	9.59667	1039	875	1115	1202	939	969	1036.67	1009.67	-0.00640799	0.952425	0.999443
10974	'ADIRF'	mRNA	22.92	28.22	22.34	30.2	33.86	34.8	32.9533	24.4933	16.62	20.98	16.4	21.39	24.73	25.44	23.8533	18	91.79	119.79	86.63	122.92	139.76	145.43	136.037	99.4033	0.418126	0.0298945	0.999443
10975	'UQCR11'	mRNA	163.56	163.92	170.52	150.86	156	152.83	153.23	166	118.59	121.87	125.2	106.84	113.92	111.72	110.827	121.887	1870	1992	1922	1758	1839	1816	1804.33	1928	-0.135446	0.0600718	0.999443
10978	'CLP1'	mRNA	13.1	11.81	12.85	12.6	9.48	10.81	10.9633	12.5867	9.5	8.78	9.43	8.92	6.93	7.9	7.91667	9.23667	224	217	218	222	169	194	195	219.667	-0.214133	0.1396	0.999443
10979	'FERMT2'	mRNA	87.71	72.35	90.01	95.54	82.07	77.55	85.0533	83.3567	63.59	53.79	66.09	67.66	59.93	56.69	61.4267	61.1567	2937	2582	2991	3263	2836	2696	2931.67	2836.67	0.0042955	0.958695	0.999443
10980	'COPS6'	mRNA	173.26	182.25	163.36	175.65	175.19	172.47	174.437	172.957	125.63	135.5	119.94	124.4	127.93	126.08	126.137	127.023	2182	2440	2030	2255	2275	2257	2262.33	2217.33	-0.0102715	0.892481	0.999443
10981	'RAB32'	mRNA	39.34	39.79	34.5	40.61	38.7	40.22	39.8433	37.8767	28.52	29.59	25.33	28.76	28.26	29.4	28.8067	27.8133	348	374	300	366	353	370	363	340.667	0.0521083	0.659236	0.999443
10982	'MAPRE2'	mRNA	9.19	7.3	10.02	9.03	6.87	7.51	7.80333	8.83667	6.66	5.43	7.35	6.39	5.01	5.49	5.63	6.48	401	339	434	402	309	340	350.333	391.333	-0.20355	0.116085	0.999443
10983	'CCNI'	mRNA	84.97	80.83	90.15	99.76	93.79	91.73	95.0933	85.3167	61.61	60.1	66.19	70.65	68.49	67.05	68.73	62.6333	2213	2179	2433	2536	2450	2367	2451	2275	0.0658191	0.371747	0.999443
10985	'GCN1'	mRNA	51.95	52.98	52.22	55.12	49.96	50.53	51.87	52.3833	37.67	39.39	38.34	39.04	36.48	36.94	37.4867	38.4667	4834	5247	4830	5235	4794	4877	4968.67	4970.33	-0.0413719	0.506649	0.999443
10987	'COPS5'	mRNA	62.02	58.43	62.38	69.02	64.06	64.48	65.8533	60.9433	44.97	43.44	45.8	48.88	46.78	47.14	47.6	44.7367	707	708	701	802	753	764	773	705.333	0.0912374	0.288682	0.999443
10988	'METAP2'	mRNA	59.72	57.43	60.48	64.24	60.62	58.82	61.2267	59.21	43.3	42.7	44.4	45.49	44.27	43	44.2533	43.4667	2069	2117	2079	2271	2166	2115	2184	2088.33	0.0236536	0.720859	0.999443
10989	'IMMT'	mRNA	108.29	104.63	104.72	120.5	109.5	106.34	112.113	105.88	78.52	77.79	76.89	85.34	79.96	77.74	81.0133	77.7333	2934	3047	2825	3328	3055	3005	3129.33	2935.33	0.0512874	0.42872	0.999443
10990	'LILRB5'	mRNA	0	0.03	0	0	0	0	0	0.01	0	0.02	0	0	0	0	0	0.00666667	0	1	0	0	0	0	0	0.333333	-1.0023	0.805965	0.999443
10991	'SLC38A3'	mRNA	3.02	3.7	3.02	2.54	2.9	2.65	2.69667	3.24667	2.19	2.75	2.22	1.8	2.12	1.93	1.95	2.38667	90	117	89	77	89	82	82.6667	98.6667	-0.29374	0.162332	0.999443
10992	'SF3B2'	mRNA	225.16	237.49	228.19	237.06	232.95	246.77	238.927	230.28	163.26	176.57	167.54	167.89	170.11	180.39	172.797	169.123	6607	7432	6630	7069	7026	7487	7194	6889.67	0.0229693	0.735217	0.999443
10993	'SDS'	mRNA	0	0	0.14	0.13	0.07	0	0.0666667	0.0466667	0	0	0.1	0.09	0.05	0	0.0466667	0.0333333	0	0	2	2	1	0	1	0.666667	0.517774	0.814032	0.999443
10994	'ILVBL'	mRNA	52.82	54.48	49.63	53.73	46.31	52.05	50.6967	52.31	38.3	40.51	36.44	38.05	33.82	38.05	36.64	38.4167	1200	1321	1118	1248	1086	1229	1187.67	1213	-0.0707936	0.408585	0.999443
10998	'SLC27A5'	mRNA	5.72	5.56	4.89	4.26	5.88	5.98	5.37333	5.39	4.15	4.13	3.59	3.02	4.3	4.37	3.89667	3.95667	117	121	99	89	124	127	113.333	112.333	-0.0237601	0.905388	0.999443
10999	'SLC27A4'	mRNA	29.54	33.99	28.55	35.79	31.02	30.85	32.5533	30.6933	21.42	25.27	20.96	25.35	22.65	22.55	23.5167	22.55	894	1084	874	1096	970	981	1015.67	950.667	0.0548111	0.557304	0.999443
11000	'SLC27A3'	mRNA	8.84	9.68	7.91	9.07	9.89	9.43	9.46333	8.81	6.41	7.2	5.8	6.42	7.22	6.89	6.84333	6.47	198	231	176	208	229	219	218.667	201.667	0.0782175	0.595485	0.999443
11001	'SLC27A2'	mRNA	51.2	45.47	49.01	57.06	52.75	49.12	52.9767	48.56	37.13	33.81	35.98	40.41	38.52	35.91	38.28	35.64	1198	1132	1135	1363	1274	1193	1276.67	1155	0.103065	0.190592	0.999443
11004	'KIF2C'	mRNA	100.91	98.2	87.15	97.65	92.9	93.25	94.6	95.42	73.16	73.01	63.99	69.16	67.84	68.17	68.39	70.0533	2891	2994	2483	2850	2745	2773	2789.33	2789.33	-0.0395799	0.595138	0.999443
11005	'SPINK5'	mRNA	10.44	9.82	9.31	13.81	10.17	10.34	11.44	9.85667	7.57	7.3	6.83	9.78	7.43	7.56	8.25667	7.23333	390	401	354	518	381	393	430.667	381.667	0.131369	0.284544	0.999443
11007	'CCDC85B'	mRNA	150.94	133.93	99.15	121.74	125.8	142.21	129.917	128.007	109.44	99.58	72.8	86.22	91.86	103.96	94.0133	93.94	1165	1098	751	957	1001	1142	1033.33	1004.67	0.00395238	0.975027	0.999443
11009	'IL24'	mRNA	0	0	0	0	0	0.06	0.02	0	0	0	0	0	0	0.05	0.0166667	0	0	0	0	0	0	1	0.333333	0	0.92125	0.82138	0.999443
110091775	'CFAP298-TCP10L'	mRNA	0.17	0.27	0.11	0.14	0.16	0.11	0.136667	0.183333	0.12	0.2	0.08	0.1	0.12	0.08	0.1	0.133333	7.59	12.8	5.05	6.36	7.67	5.07	6.36667	8.48	-0.451973	0.528355	0.999443
1101	'CHAD'	mRNA	0	0	0	0	0	0.06	0.02	0	0	0	0	0	0	0.04	0.0133333	0	0	0	0	0	0	1	0.333333	0	0.92125	0.82138	0.999443
11010	'GLIPR1'	mRNA	0	0.05	0	0	0.02	0.02	0.0133333	0.0166667	0	0.04	0	0	0.02	0.02	0.0133333	0.0133333	0	2	0	0	1	1	0.666667	0.666667	-0.016581	0.994507	0.999443
11011	'TLK2'	mRNA	15.63	14.08	15.91	19.73	18.63	17.97	18.7767	15.2067	11.33	10.47	11.68	13.97	13.6	13.14	13.57	11.16	784	783	777	921	947	896	921.333	781.333	0.197439	0.0185562	0.999443
110116772	'ZNF765-ZNF761'	mRNA	0.48	0.34	0.53	0.39	0.4	0.19	0.326667	0.45	0.35	0.25	0.39	0.28	0.29	0.14	0.236667	0.33	27.3	20.29	29.39	22.58	23.3	11.28	19.0533	25.66	-0.484583	0.250142	0.999443
11014	'KDELR2'	mRNA	134.39	109.53	140.06	126.72	115.39	109.68	117.263	127.993	97.44	81.44	102.84	89.75	84.26	80.18	84.73	93.9067	3745	3248	3870	3603	3316	3172	3363.67	3621	-0.149005	0.0636508	0.999443
11015	'KDELR3'	mRNA	29.33	27.7	30.55	29.39	28.53	28.41	28.7767	29.1933	21.27	20.6	22.43	20.82	20.83	20.77	20.8067	21.4333	407	385	421	409	424	386	406.333	404.333	-0.0338026	0.75837	0.999443
11016	'ATF7'	mRNA	20.17	18.65	23.45	21.86	23.36	19.34	21.52	20.7567	14.63	13.87	17.21	15.48	17.06	14.14	15.56	15.2367	831.62	731.93	946.19	832.2	860.17	755.26	815.877	836.58	-0.0776775	0.462354	0.999443
11017	'SNRNP27'	mRNA	41.87	40.26	43.29	39.69	42.42	37.22	39.7767	41.8067	30.36	29.93	31.79	28.11	30.98	27.21	28.7667	30.6933	537	549	548	519	561	496	525.333	544.667	-0.0923883	0.355416	0.999443
11018	'TMED1'	mRNA	21.4	21.72	16.19	22.82	18.65	19.99	20.4867	19.77	15.52	16.15	11.88	16.16	13.62	14.62	14.8	14.5167	270	316	229	312	254	281	282.333	271.667	0.0151246	0.912987	0.999443
11019	'LIAS'	mRNA	9.55	6.51	7.34	6.15	8.25	8.41	7.60333	7.8	6.92	4.84	5.39	4.36	6.03	6.15	5.51333	5.71667	152	128	149	121	143	150	138	143	-0.0907251	0.604179	0.999443
1102	'RCBTB2'	mRNA	0.6	0.42	0.84	1.14	0.87	0.61	0.873333	0.62	0.43	0.31	0.62	0.81	0.63	0.44	0.626667	0.453333	18	14	26	35	24	19	26	19.3333	0.379758	0.365434	0.999443
11020	'IFT27'	mRNA	16.68	16.05	16.18	16.3	16.98	16.86	16.7133	16.3033	12.09	11.93	11.88	11.54	12.4	12.32	12.0867	11.9667	149	155	141	149	156	158	154.333	148.333	0.0175967	0.912694	0.999443
11021	'RAB35'	mRNA	52.6	55.45	56.27	59.99	54.05	53.66	55.9	54.7733	38.14	41.23	41.31	42.48	39.47	39.23	40.3933	40.2267	1534	1718	1631	1784	1629	1624	1679	1627.67	0.0035476	0.962146	0.999443
11022	'TDRKH'	mRNA	7.54	6.82	7.72	7.31	6.22	6.73	6.75333	7.36	5.46	5.07	5.67	5.18	4.54	4.92	4.88	5.4	212.29	206.05	211.96	209.41	180.42	196.8	195.543	210.1	-0.146106	0.302705	0.999443
11025	'LILRB3'	mRNA	0.29	0.24	0.15	0.29	0.13	0.24	0.22	0.226667	0.21	0.18	0.11	0.2	0.09	0.17	0.153333	0.166667	8	7	4.01	8.16	3.59	6.84	6.19667	6.33667	-0.203566	0.792652	0.999443
11026	'LILRA3'	mRNA	0	0	0	0.08	0	0	0.0266667	0	0	0	0	0.06	0	0	0.02	0	0	0	0	1	0	0	0.333333	0	0.92125	0.82138	0.999443
11027	'LILRA2'	mRNA	0.02	0.04	0	0	0	0.02	0.00666667	0.02	0.02	0.03	0	0	0	0.02	0.00666667	0.0166667	1.21	1.99	0	0	0	1	0.333333	1.06667	-0.928856	0.72663	0.999443
11030	'RBPMS'	mRNA	6.18	6.62	8.2	6.26	7.5	6.97	6.91	7	4.48	4.92	6.02	4.44	5.47	5.09	5	5.14	80	93	104	86	102	99	95.6667	92.3333	0.0113229	0.956397	0.999443
11031	'RAB31'	mRNA	80.26	67.7	81.61	80.54	79.23	77.08	78.95	76.5233	58.19	50.34	59.92	57.04	57.86	56.35	57.0833	56.15	3256	2923	3290	3335	3319	3249	3301	3156.33	0.0234747	0.744277	0.999443
11033	'ADAP1'	mRNA	33.63	38.26	34.86	38.36	40.36	39.57	39.43	35.5833	24.39	28.45	25.6	27.16	29.47	28.93	28.52	26.1467	750	932	779	878	945	925	916	820.333	0.120287	0.215456	0.999443
11034	'DSTN'	mRNA	101.49	76.54	97.08	100.24	87.09	85.47	90.9333	91.7033	73.59	56.91	71.28	70.99	63.6	62.48	65.69	67.26	2869	2359	2769	2919	2585	2540	2681.33	2665.67	-0.0342985	0.685384	0.999443
11035	'RIPK3'	mRNA	0	0.05	0	0	0	0	0	0.0166667	0	0.04	0	0	0	0	0	0.0133333	0	1	0	0	0	0	0	0.333333	-1.0023	0.805965	0.999443
11037	'STON1'	mRNA	0.33	0.37	0.38	0.25	0.2	0.33	0.26	0.36	0.24	0.27	0.28	0.18	0.15	0.24	0.19	0.263333	19	23	22	15	12	20	15.6667	21.3333	-0.485452	0.271905	0.999443
110384692	'LOC110384692'	mRNA	1.33	0.61	1.13	0.35	1.11	1.17	0.876667	1.02333	0.97	0.46	0.83	0.25	0.81	0.86	0.64	0.753333	76.1	37.22	64.26	20.3	65.45	69.48	51.7433	59.1933	-0.23229	0.700862	0.999443
1104	'RCC1'	mRNA	88.09	83.64	85.12	85.15	82.7	78.06	81.97	85.6167	63.87	62.19	62.49	60.3	60.39	57.06	59.25	62.85	2340	2364	2241	2304	2263	2152	2239.67	2315	-0.0882656	0.182926	0.999443
11040	'PIM2'	mRNA	23.14	25.23	29.58	21.75	19.33	21.99	21.0233	25.9833	16.78	18.76	21.72	15.41	14.12	16.08	15.2033	19.0867	463	537	586	444	399	457	433.333	528.667	-0.328413	0.00428852	0.825793
11041	'B4GAT1'	mRNA	31.31	28.56	28.54	31	30.46	31.4	30.9533	29.47	22.7	21.23	20.95	21.96	22.24	22.95	22.3833	21.6267	603	585	544	609	605	628	614	577.333	0.0489467	0.605565	0.999443
11043	'MID2'	mRNA	2.83	2.48	2.72	2.62	2.57	2.47	2.55333	2.67667	2.05	1.84	2	1.85	1.87	1.81	1.84333	1.96333	219	205	209	207	206.94	198	203.98	211	-0.0917213	0.510586	0.999443
11044	'TENT4A'	mRNA	37.4	32.83	38.09	35.78	35.38	33.67	34.9433	36.1067	27.12	24.41	27.96	25.34	25.84	24.61	25.2633	26.4967	1517	1461	1475	1454	1449	1463	1455.33	1484.33	-0.0688592	0.343775	0.999443
11045	'UPK1A'	mRNA	0.18	0.34	0.37	0.26	0.17	0.17	0.2	0.296667	0.13	0.25	0.27	0.19	0.13	0.13	0.15	0.216667	2	4	4	3	2	2	2.33333	3.33333	-0.55873	0.611636	0.999443
11046	'SLC35D2'	mRNA	14.26	14.01	14.14	15.74	16.11	15.49	15.78	14.1367	10.34	10.42	10.38	11.15	11.76	11.32	11.41	10.38	213	210	205	240	247	236	241	209.333	0.162978	0.22602	0.999443
11047	'ADRM1'	mRNA	286.07	314.62	303.37	284.49	304.09	306.57	298.383	301.353	207.42	233.92	222.73	201.48	222.06	224.11	215.883	221.357	3570	4180	3736	3617	3919	3981	3839	3828.67	-0.0348277	0.654528	0.999443
1105	'CHD1'	mRNA	5.73	6.23	7.14	6.35	5.91	6.2	6.15333	6.36667	4.16	4.63	5.24	4.49	4.32	4.53	4.44667	4.67667	396	457	463	448	417	441	435.333	438.667	-0.0520939	0.633662	0.999443
11051	'NUDT21'	mRNA	57.69	45.81	59.67	55.96	53.35	51.29	53.5333	54.39	41.83	34.06	43.81	39.63	38.96	37.5	38.6967	39.9	2633	2225	2704	2606	2511	2429	2515.33	2520.67	-0.0451236	0.588428	0.999443
11052	'CPSF6'	mRNA	22.78	21.3	24.06	22.98	23.02	23.92	23.3067	22.7133	16.52	15.84	17.67	16.28	16.81	17.49	16.86	16.6767	1596	1588	1676	1643	1664	1738	1681.67	1620	0.0135594	0.857228	0.999443
11054	'OGFR'	mRNA	121.94	143.14	116.87	124.63	129.9	134.44	129.657	127.317	88.42	106.42	85.81	88.26	94.86	98.28	93.8	93.55	2892	3611	2746	3015	3177	3310	3167.33	3083	0.00108621	0.990528	0.999443
11056	'DDX52'	mRNA	5.93	5.17	5.94	6.74	6.34	5.73	6.27	5.68	4.3	3.84	4.36	4.77	4.63	4.19	4.53	4.16667	402	373	400	466	443	403	437.333	391.667	0.117473	0.281973	0.999443
11057	'ABHD2'	mRNA	6.04	4.69	6.67	7.29	6.62	5.87	6.59333	5.8	4.38	3.48	4.9	5.16	4.83	4.29	4.76	4.25333	481	434	532	535	505	455	498.333	482.333	0.00452006	0.967775	0.999443
11059	'WWP1'	mRNA	10.29	7.94	10.39	10.81	9.09	9.82	9.90667	9.54	7.46	5.9	7.63	7.66	6.64	7.18	7.16	6.99667	448	378	438	498	396	460	451.333	421.333	0.0566152	0.62812	0.999443
110599563	'LY6G6F-LY6G6D'	mRNA	0	0.08	0	0	0	0	0	0.0266667	0	0.06	0	0	0	0	0	0.02	0	1	0	0	0	0	0	0.333333	-1.0023	0.805965	0.999443
110599564	'EEF1AKMT4'	mRNA	40.76	42.81	46.07	39.89	37.68	36.48	38.0167	43.2133	29.55	31.83	33.82	28.25	27.52	26.67	27.48	31.7333	320	357	355	319	305	298	307.333	344	-0.203649	0.083985	0.999443
110599588	'ASDURF'	mRNA	13.33	9.61	12.95	12.83	16.3	10.54	13.2233	11.9633	9.67	7.14	9.51	9.08	11.91	7.71	9.56667	8.77333	56.17	43.24	53.25	55.11	70.72	46.65	57.4933	50.8867	0.129324	0.634976	0.999443
1106	'CHD2'	mRNA	19.1	16.87	17.13	19.61	17.95	18.79	18.7833	17.7	13.85	12.54	12.58	13.89	13.11	13.73	13.5767	12.99	1799	1746	1673	1931	1763	1861	1851.67	1739.33	0.0494773	0.482772	0.999443
11060	'WWP2'	mRNA	15.84	18.19	15.79	20.73	19.22	17.75	19.2333	16.6067	11.48	13.52	11.59	14.68	14.03	12.98	13.8967	12.1967	651	789	619	850	785	736	790.333	686.333	0.16316	0.106284	0.999443
11062	'DUS4L'	mRNA	5.77	6.42	5.82	6.5	6.78	6.24	6.50667	6.00333	4.19	4.77	4.27	4.61	4.95	4.56	4.70667	4.41	123.92	149.96	126.27	144.45	153.16	141.09	146.233	133.383	0.098532	0.56119	0.999443
11063	'SOX30'	mRNA	0.05	0	0	0	0	0	0	0.0166667	0.03	0	0	0	0	0	0	0.01	1	0	0	0	0	0	0	0.333333	-1.0023	0.805965	0.999443
11064	'CNTRL'	mRNA	4.43	5.08	4.67	5.1	4.82	4.83	4.91667	4.72667	3.21	3.77	3.43	3.61	3.52	3.53	3.55333	3.47	275	336	280	315	308	323	315.333	297	0.0467443	0.70805	0.999443
11065	'UBE2C'	mRNA	437.91	459.18	455.43	434.74	435.32	424.06	431.373	450.84	317.52	341.39	334.38	307.89	317.88	309.99	311.92	331.097	2461	2739	2502	2484	2519	2493	2498.67	2567.33	-0.0789275	0.255418	0.999443
11066	'SNRNP35'	mRNA	16.66	20.47	17.91	21.16	20.65	19.64	20.4833	18.3467	12.08	15.22	13.15	14.98	15.08	14.36	14.8067	13.4833	197	252	216	256	248	240	248	221.667	0.121625	0.38047	0.999443
11067	'DEPP1'	mRNA	0.05	0.09	0.05	0.05	0	0.05	0.0333333	0.0633333	0.04	0.07	0.04	0.03	0	0.03	0.02	0.05	1	2	1	1	0	1	0.666667	1.33333	-1.04267	0.580561	0.999443
11068	'CYB561D2'	mRNA	18.61	20.21	16.74	21.38	20.28	20.56	20.74	18.52	13.49	15.03	12.29	15.14	14.81	15.03	14.9933	13.6033	190	218	168	220	213	217	216.667	192	0.134849	0.355102	0.999443
11069	'RAPGEF4'	mRNA	0	0.03	0.03	0	0.03	0.07	0.0333333	0.02	0	0.02	0.02	0	0.02	0.05	0.0233333	0.0133333	0	1	1	0	1	3	1.33333	0.666667	0.971812	0.622721	0.999443
1107	'CHD3'	mRNA	50.58	53.33	51.67	59.11	53.91	52.38	55.1333	51.86	36.68	39.65	37.94	41.86	39.37	38.29	39.84	38.09	3802	4268	3853	4522	4187	4090	4266.33	3974.33	0.0613775	0.358762	0.999443
11070	'TMEM115'	mRNA	47.68	51.61	45.38	51.03	51.66	52.11	51.6	48.2233	34.57	38.37	33.32	36.14	37.73	38.1	37.3233	35.42	971	1118	915	1060	1085	1102	1082.33	1001.33	0.0732169	0.409817	0.999443
11072	'DUSP14'	mRNA	39.54	37.43	37.14	41.14	38.48	32.85	37.49	38.0367	28.67	27.83	27.27	29.14	28.1	24.01	27.0833	27.9233	534	539	496	567	534	463	521.333	523	-0.0458596	0.657316	0.999443
11073	'TOPBP1'	mRNA	27.47	25.06	28.94	31.01	27.92	27.75	28.8933	27.1567	19.92	18.63	21.25	21.96	20.39	20.29	20.88	19.9333	1564	1505	1660	1819	1659	1653	1710.33	1576.33	0.0756804	0.321544	0.999443
11074	'TRIM31'	mRNA	0.41	0.68	0.56	0.3	0.28	0.44	0.34	0.55	0.3	0.5	0.41	0.21	0.21	0.33	0.25	0.403333	8	14	10	6	5	9	6.66667	10.6667	-0.716326	0.268784	0.999443
11076	'TPPP'	mRNA	3.27	3.17	2.72	2.96	3.13	2.87	2.98667	3.05333	2.37	2.36	2	2.1	2.29	2.1	2.16333	2.24333	207	214	171	191	204	189	194.667	197.333	-0.0587594	0.692265	0.999443
11077	'HSF2BP'	mRNA	2.6	1.93	2.14	2.36	2.71	3.39	2.82	2.22333	1.89	1.43	1.57	1.67	1.98	2.48	2.04333	1.63	94	81	75	91	94	112	99	83.3333	0.20962	0.316129	0.999443
11078	'TRIOBP'	mRNA	34.12	38.24	30.61	36.77	33.38	37.34	35.83	34.3233	24.74	28.43	22.48	26.04	24.38	27.3	25.9067	25.2167	1106	1292	1003	1282	1144	1275	1233.67	1133.67	0.0822836	0.376247	0.999443
11079	'RER1'	mRNA	60.43	53.75	56.21	60.71	57.17	59.17	59.0167	56.7967	43.82	39.96	41.27	42.99	41.75	43.25	42.6633	41.6833	1846	1747	1703	1892	1801	1876	1856.33	1765.33	0.0320283	0.649973	0.999443
1108	'CHD4'	mRNA	76.09	73.03	70.04	84.75	75.09	74.69	78.1767	73.0533	55.17	54.3	51.42	60.02	54.84	54.6	56.4867	53.63	5199	5309	4755	5907	5290	5298	5498.33	5087.67	0.0709791	0.274715	0.999443
11080	'DNAJB4'	mRNA	9.53	9.09	11.33	10.65	7.58	8.42	8.88333	9.98333	6.91	6.76	8.32	7.54	5.53	6.15	6.40667	7.33	273	279	323	315	225	251	263.667	291.667	-0.189759	0.178812	0.999443
110806280	'CCDC194'	mRNA	0.09	0.16	0.09	0	0	0	0	0.113333	0.06	0.12	0.06	0	0	0	0	0.08	1	2	1	0	0	0	0	1.33333	-2.89491	0.212321	0.999443
110806298	'C17orf113'	mRNA	0.35	0.29	0.39	0.2	0.23	0.3	0.243333	0.343333	0.25	0.22	0.29	0.14	0.17	0.22	0.176667	0.253333	13.34	12	15	8	9.11	12	9.70333	13.4467	-0.503559	0.362506	0.999443
11083	'DIDO1'	mRNA	37.72	37.64	36.12	38.89	36.89	37.81	37.8633	37.16	27.35	27.99	26.52	27.54	26.94	27.64	27.3733	27.2867	2551	2666	2326	2687	2499	2704	2630	2514.33	0.0249451	0.726213	0.999443
11091	'WDR5'	mRNA	46.05	44.4	43.34	47.57	44.48	46.22	46.09	44.5967	33.39	33.01	31.82	33.69	32.48	33.79	33.32	32.74	1473	1513	1376	1555	1470	1535	1520	1454	0.0238033	0.745062	0.999443
11092	'SPACA9'	mRNA	19.57	24.54	22.02	24.83	25.05	24.8	24.8933	22.0433	14.19	18.25	16.17	17.59	18.29	18.13	18.0033	16.2033	148.59	183	152	179	187	191	185.667	161.197	0.166408	0.286257	0.999443
11093	'ADAMTS13'	mRNA	1.61	1.76	1.93	1.65	1.33	1.52	1.5	1.76667	1.17	1.31	1.42	1.17	0.97	1.11	1.08333	1.3	60	81	74	68	57	74	66.3333	71.6667	-0.152208	0.522859	0.999443
11094	'CACFD1'	mRNA	5.63	5.91	5.37	6.34	6.04	6.03	6.13667	5.63667	4.08	4.39	3.95	4.49	4.41	4.41	4.43667	4.14	164	180	154	186	180	179	181.667	166	0.089994	0.552116	0.999443
11096	'ADAMTS5'	mRNA	2.48	2.43	2.69	2.61	2.69	2.81	2.70333	2.53333	1.8	1.81	1.98	1.85	1.96	2.05	1.95333	1.86333	266	278	287	286	296	312	298	277	0.0653269	0.600113	0.999443
11097	'NUP42'	mRNA	30.15	24.99	32.51	29.54	28.6	29.28	29.14	29.2167	21.86	18.58	23.87	20.92	20.89	21.4	21.07	21.4367	457	400	483	455	448	457	453.333	446.667	-0.0199806	0.856821	0.999443
11098	'PRSS23'	mRNA	387.18	357.47	375.41	443.03	428.29	422	431.107	373.353	280.73	265.77	275.63	313.76	312.75	308.49	311.667	274.043	14760	14500	14203	17233	16838	16694	16921.7	14487.7	0.183526	0.000705	0.306035
11099	'PTPN21'	mRNA	3.75	3	3.69	4.43	4.04	4.42	4.29667	3.48	2.72	2.23	2.71	3.13	2.95	3.23	3.10333	2.55333	236	214	227	285	258	281	274.667	225.667	0.242347	0.0640081	0.999443
111	'ADCY5'	mRNA	0.04	0.04	0.08	0.02	0.02	0.05	0.03	0.0533333	0.03	0.03	0.06	0.01	0.01	0.04	0.02	0.04	2	2	4	1	1	3	1.66667	2.66667	-0.718068	0.573362	0.999443
11100	'HNRNPUL1'	mRNA	147.03	142.51	156.39	166.4	157.93	148.77	157.7	148.643	106.61	105.95	114.82	117.85	115.33	108.75	113.977	109.127	5733	5960.09	6036	6626	6348	6067	6347	5909.7	0.0616934	0.313245	0.999443
11101	'ATE1'	mRNA	14.26	10.76	11.62	15.83	12.65	9.96	12.8133	12.2133	10.34	8	8.53	11.21	9.24	7.28	9.24333	8.95667	451	392	484	498	448	413	453	442.333	-0.00855512	0.941229	0.999443
11102	'RPP14'	mRNA	3.39	1.8	2.67	3.84	2.8	3.33	3.32333	2.62	2.46	1.34	1.96	2.72	2.04	2.44	2.4	1.92	177.94	114.02	135.52	192.18	141.8	168.64	167.54	142.493	0.191004	0.300801	0.999443
11103	'KRR1'	mRNA	5.33	4.68	5.79	5.67	5.08	5.34	5.36333	5.26667	3.87	3.48	4.25	4.01	3.71	3.9	3.87333	3.86667	580	542	626	629	570	602	600.333	582.667	0.00121627	0.990251	0.999443
11104	'KATNA1'	mRNA	24.88	24.55	26.25	29.06	25.63	26.97	27.22	25.2267	18.04	18.25	19.28	20.58	18.72	19.72	19.6733	18.5233	449	466	468	533	476	505	504.667	461	0.0892599	0.37662	0.999443
11105	'PRDM7'	mRNA	0	0.03	0	0	0	0	0	0.01	0	0.02	0	0	0	0	0	0.00666667	0	1	0	0	0	0	0	0.333333	-1.0023	0.805965	0.999443
11107	'PRDM5'	mRNA	0.83	0.93	0.41	0.65	0.49	0.48	0.54	0.723333	0.6	0.69	0.3	0.46	0.36	0.35	0.39	0.53	15	22	13	19	13	9	13.6667	16.6667	-0.329256	0.509208	0.999443
11108	'PRDM4'	mRNA	13.09	11.93	13.6	14.15	13.81	13.81	13.9233	12.8733	9.49	8.87	9.99	10.02	10.08	10.1	10.0667	9.45	558	546	585	622	617	616	618.333	563	0.0943955	0.319221	0.999443
111089941	'MMP24-AS1-EDEM2'	mRNA	0.23	0.35	0.24	0.12	0	0.12	0.08	0.273333	0.17	0.26	0.17	0.08	0	0.08	0.0533333	0.2	5.37	8.59	5.43	2.78	0	2.78	1.85333	6.46333	-2.2122	0.0470536	0.999443
1111	'CHEK1'	mRNA	20.77	18.66	21.36	23.6	22.45	20.68	22.2433	20.2633	15.06	13.88	15.69	16.71	16.4	15.12	16.0767	14.8767	583	565	624	666	633	596	631.667	590.667	0.0550809	0.567352	0.999443
11112	'HIBADH'	mRNA	57.2	51.86	58.42	56.83	56.71	55.11	56.2167	55.8267	41.48	38.56	42.89	40.25	41.41	40.29	40.65	40.9767	1022	989	1035	1036	1044	1024	1034.67	1015.33	-0.0134344	0.866927	0.999443
11113	'CIT'	mRNA	17.14	17.17	18.45	18.67	18.97	17.9	18.5133	17.5867	12.43	12.76	13.54	13.22	13.85	13.09	13.3867	12.91	1523	1601	1630	1690	1732	1632	1684.67	1584.67	0.0476788	0.519566	0.999443
11116	'CEP43'	mRNA	3.19	3.29	3.45	3.7	3.25	3.16	3.37	3.31	2.32	2.45	2.53	2.62	2.37	2.31	2.43333	2.43333	207	222	215	226	229	211	222	214.667	0.00787306	0.954147	0.999443
11117	'EMILIN1'	mRNA	0.07	0.19	0.1	0.29	0.19	0.34	0.273333	0.12	0.05	0.14	0.07	0.21	0.14	0.25	0.2	0.0866667	3	8	4	12	8	14	11.3333	5	1.14147	0.099521	0.999443
11118	'BTN3A2'	mRNA	35.42	32.69	32.03	33.42	30.28	33.24	32.3133	33.38	25.68	24.3	23.52	23.67	22.11	24.3	23.36	24.5	1306.29	1265.19	1129.26	1254.4	1103.05	1238.74	1198.73	1233.58	-0.0819864	0.32825	0.999443
11119	'BTN3A1'	mRNA	11.69	10.36	11.15	11.35	9.58	10.88	10.6033	11.0667	8.47	7.7	8.19	8.04	6.99	7.95	7.66	8.12	416.27	383.33	394.42	409.32	349.86	396.71	385.297	398.007	-0.0893514	0.424478	0.999443
1112	'FOXN3'	mRNA	5.52	4.76	6.06	5.87	5.81	5.16	5.61333	5.44667	4	3.54	4.45	4.16	4.24	3.77	4.05667	3.99667	470	432	513	510	511	457	492.667	471.667	0.0210566	0.847004	0.999443
11120	'BTN2A1'	mRNA	10.75	10.26	11.9	11.61	11.05	11.06	11.24	10.97	7.8	7.63	8.74	8.22	8.07	8.08	8.12333	8.05667	316.97	324	340	338	334	336	336	326.99	-0.000154	0.998938	0.999577
11123	'RCAN3'	mRNA	5.29	4.62	4.44	5.38	5.25	4.56	5.06333	4.78333	3.84	3.43	3.26	3.81	3.83	3.34	3.66	3.51	196	183	169	206	195	173	191.333	182.667	0.0258715	0.86229	0.999443
11124	'FAF1'	mRNA	75.48	68.28	76.56	74.39	72.39	68.48	71.7533	73.44	54.73	50.76	56.21	52.68	52.86	50.06	51.8667	53.9	2030.49	2065.99	2182	2105	2116	2008	2076.33	2092.83	-0.0520624	0.465715	0.999443
11127	'KIF3A'	mRNA	3.29	2.9	3.21	3.54	3.22	2.87	3.21	3.13333	2.39	2.16	2.36	2.51	2.35	2.1	2.32	2.30333	123	109	130	133	119	106	119.333	120.667	-0.0586749	0.74859	0.999443
11128	'POLR3A'	mRNA	9.19	7.94	8.98	10.69	9.73	9.17	9.86333	8.70333	6.67	5.91	6.59	7.57	7.11	6.7	7.12667	6.39	645	593	626	765	704	667	712	621.333	0.154778	0.0971958	0.999443
11129	'CLASRP'	mRNA	24.78	28.68	21.01	25.45	26.76	29.26	27.1567	24.8233	17.97	21.32	15.43	18.03	19.54	21.39	19.6533	18.24	534	663	450	559	598	660	605.667	549	0.104706	0.402417	0.999443
1113	'CHGA'	mRNA	0	0	0	0.07	0.14	0	0.07	0	0	0	0	0.05	0.1	0	0.05	0	0	0	0	1	2	0	1	0	2.40266	0.384663	0.999443
11130	'ZWINT'	mRNA	218.38	206.04	186.61	220.87	206.53	205.03	210.81	203.677	158.34	153.19	137.01	156.42	150.82	149.88	152.373	149.513	3701	3702	3131	3800	3592	3602	3664.67	3511.33	0.0217372	0.763905	0.999443
11131	'CAPN11'	mRNA	0.54	0.37	0.53	0.58	0.32	0.52	0.473333	0.48	0.4	0.28	0.39	0.41	0.23	0.38	0.34	0.356667	13	9	14	16	9	13	12.6667	12	0.0327197	0.951643	0.999443
11132	'CAPN10'	mRNA	12.45	13.08	10.69	10.99	11.69	12.2	11.6267	12.0733	9.03	9.72	7.85	7.79	8.54	8.92	8.41667	8.86667	323	361	275	291	313	330	311.333	319.667	-0.0762624	0.556617	0.999443
11133	'KPTN'	mRNA	5	4.07	3.79	5.23	4.54	3.65	4.47333	4.28667	3.62	3.03	2.78	3.7	3.32	2.67	3.23	3.14333	76	66	58	82	71	58	70.3333	66.6667	0.0353884	0.882389	0.999443
11135	'CDC42EP1'	mRNA	95.2	103.95	99.11	100.45	103.08	103.49	102.34	99.42	69.03	77.29	72.77	71.14	75.27	75.65	74.02	73.03	1982	2302	2043	2133	2213	2237	2194.33	2109	0.017938	0.81542	0.999443
11137	'PWP1'	mRNA	29.02	25.31	32.51	32.38	29.38	30.18	30.6467	28.9467	21.04	18.82	23.87	22.93	21.46	22.06	22.15	21.2433	734	682	816	835	767	792	798	744	0.0589698	0.537695	0.999443
11138	'TBC1D8'	mRNA	28.16	27.24	25.81	27.16	26.04	26.15	26.45	27.07	20.42	20.26	18.95	19.24	19.02	19.12	19.1267	19.8767	1220	1241	1108	1190	1165	1147	1167.33	1189.67	-0.0674062	0.387403	0.999443
1114	'CHGB'	mRNA	0	0.15	0	0.12	0.04	0.08	0.08	0.05	0	0.12	0	0.09	0.03	0.06	0.06	0.04	0	4	0	3	1	2	2	1.33333	0.548183	0.728185	0.999443
11140	'CDC37'	mRNA	238.89	252.51	227.5	244.05	234.26	249.08	242.463	239.633	173.21	187.73	167.03	172.84	171.06	182.08	175.327	175.99	3594	4039	3380	3738	3639	3891	3756	3671	-0.00620219	0.932971	0.999443
11141	'IL1RAPL1'	mRNA	0	0.03	0	0	0	0	0	0.01	0	0.02	0	0	0	0	0	0.00666667	0	1	0	0	0	0	0	0.333333	-1.0023	0.805965	0.999443
11142	'PKIG'	mRNA	43.65	41.9	39.61	47.98	41.3	45.22	44.8333	41.72	31.65	31.15	29.09	33.98	30.16	33.06	32.4	30.63	416	430	373	469	411	449	443	406.333	0.084056	0.437981	0.999443
11143	'KAT7'	mRNA	19.43	14.92	20.28	20.04	18.77	17.34	18.7167	18.21	14.09	11.09	14.89	14.19	13.71	12.68	13.5267	13.3567	849	765	891	976	923	888	929	835	0.111934	0.216755	0.999443
11144	'DMC1'	mRNA	0.24	0.08	0.15	0.18	0.26	0.22	0.22	0.156667	0.18	0.06	0.11	0.13	0.19	0.16	0.16	0.116667	5	2	3	3	4	3	3.33333	3.33333	-0.0397541	0.968705	0.999443
11145	'PLAAT3'	mRNA	96.74	96.73	101.57	94.82	94.84	99.85	96.5033	98.3467	70.15	71.92	74.58	67.15	69.25	72.99	69.7967	72.2167	1093	1151	1118	1080	1100	1156	1112	1120.67	-0.0510418	0.525756	0.999443
11146	'GLMN'	mRNA	5.29	4.63	6.56	6.75	5.26	5.25	5.75333	5.49333	3.84	3.44	4.81	4.78	3.84	3.84	4.15333	4.03	108	101	131	139	111	111	120.333	113.333	0.0427046	0.822564	0.999443
11147	'HHLA3'	mRNA	56.08	58.62	63.94	60.47	56.5	57.06	58.01	59.5467	40.66	43.59	46.94	42.82	41.26	41.71	41.93	43.73	324	347	378	364	343	341	349.333	349.667	-0.0429348	0.713552	0.999443
11148	'HHLA2'	mRNA	1.44	2.51	2.32	1.96	2.16	1.85	1.99	2.09	1.05	1.87	1.7	1.39	1.58	1.35	1.44	1.54	32.34	59.77	51.4	44.87	49.82	43.04	45.91	47.8367	-0.102097	0.730757	0.999443
11149	'BVES'	mRNA	0.02	0.02	0.07	0.02	0	0.07	0.03	0.0366667	0.01	0.01	0.05	0.01	0	0.05	0.02	0.0233333	1	1	4	1	0	4	1.66667	2	-0.306229	0.833895	0.999443
11151	'CORO1A'	mRNA	0.47	0.25	0.47	0.2	0.19	0.16	0.183333	0.396667	0.34	0.19	0.35	0.14	0.14	0.12	0.133333	0.293333	7	4	7	3	3	3	3	6	-1.04247	0.243151	0.999443
11152	'WDR45'	mRNA	69.24	70.25	60.76	66.52	71.72	67.2	68.48	66.75	50.2	52.23	44.61	47.11	52.37	49.13	49.5367	49.0133	1029.04	1107	893.01	1011	1105.99	1039.52	1052.17	1009.68	0.0202755	0.825833	0.999443
11153	'FICD'	mRNA	3.6	2.87	3.35	3.44	3.26	3.32	3.34	3.27333	2.61	2.13	2.46	2.44	2.38	2.43	2.41667	2.4	119	101	110	116	111	114	113.667	110	0.00636118	0.972524	0.999443
11154	'AP4S1'	mRNA	3.09	2.57	2.58	2.96	2.83	2.74	2.84333	2.74667	2.24	1.91	1.9	2.1	2.07	2	2.05667	2.01667	104	100	95	109	92	106	102.333	99.6667	-0.00293369	0.987881	0.999443
11155	'LDB3'	mRNA	0.11	0.27	0.24	0.27	0.14	0.13	0.18	0.206667	0.08	0.2	0.18	0.19	0.1	0.09	0.126667	0.153333	4	6	5	12	8	3	7.66667	5	0.569311	0.462605	0.999443
11156	'PTP4A3'	mRNA	2.67	3.4	2.93	2.44	2.93	2.71	2.69333	3	1.94	2.53	2.15	1.73	2.14	1.98	1.95	2.20667	76	103	83	71	86	80	79	87.3333	-0.183044	0.40436	0.999443
11157	'LSM6'	mRNA	13.03	13.75	11.57	13.67	13.76	11.37	12.9333	12.7833	9.45	10.22	8.5	9.68	10.05	8.31	9.34667	9.39	166	164	160	160	179	161	166.667	163.333	-0.0106456	0.945456	0.999443
11158	'RABL2B'	mRNA	9.94	10.12	10.51	12.55	10.93	11.82	11.7667	10.19	7.21	7.52	7.72	8.89	7.98	8.64	8.50333	7.48333	226.38	240.69	234.11	281.52	254.32	270.23	268.69	233.727	0.160612	0.213392	0.999443
11159	'RABL2A'	mRNA	3.09	3.99	2.97	4	3.33	3.93	3.75333	3.35	2.24	2.97	2.18	2.83	2.43	2.87	2.71	2.46333	54.62	65.31	52.89	67.48	63.68	66.77	65.9767	57.6067	0.156908	0.521144	0.999443
11160	'ERLIN2'	mRNA	18.27	13.85	14.76	15.16	15.14	16.22	15.5067	15.6267	13.25	10.3	10.83	10.73	11.06	11.86	11.2167	11.46	654	563	619	610	633	623	622	612	-0.0170766	0.862364	0.999443
11161	'ERG28'	mRNA	26.06	22.72	28.48	23.17	22.19	19.25	21.5367	25.7533	18.89	16.89	20.91	16.41	16.21	14.07	15.5633	18.8967	592	549	641	537	520	454	503.667	594	-0.280202	0.00836194	0.999443
11162	'NUDT6'	mRNA	6.85	10.2	7.66	6.83	7.34	8.44	7.53667	8.23667	4.97	7.59	5.63	4.84	5.36	6.17	5.45667	6.06333	68	110	76	70	75	87	77.3333	84.6667	-0.168377	0.472394	0.999443
11163	'NUDT4'	mRNA	10.24	7.19	11.46	9.06	8.8	8.36	8.74	9.63	7.43	5.35	8.41	6.41	6.43	6.11	6.31667	7.06333	569.97	485.26	603.66	518.37	539.79	505.67	521.277	552.963	-0.126559	0.246883	0.999443
11164	'NUDT5'	mRNA	57.87	55.52	61.11	62.05	58.96	53.55	58.1867	58.1667	41.96	41.28	44.87	43.94	43.06	39.15	42.05	42.7033	1889	1924	1979	2067	1985	1813	1955	1930.67	-0.0234794	0.7477	0.999443
11165	'NUDT3'	mRNA	12.06	12.99	14.09	13.18	13.21	12.11	12.8333	13.0467	8.75	9.66	10.34	9.33	9.65	8.85	9.27667	9.58333	1285.04	1473.27	1492.25	1432.84	1451.09	1337.83	1407.25	1416.85	-0.0511549	0.540765	0.999443
11167	'FSTL1'	mRNA	51.28	39.72	49.34	52.71	50.25	43.78	48.9133	46.78	37.18	29.53	36.23	37.33	36.7	32	35.3433	34.3133	2971	2510	2830	3153	3020	2690	2954.33	2770.33	0.050656	0.536919	0.999443
11168	'PSIP1'	mRNA	122.81	121.49	123.72	142.51	132.17	126.42	133.7	122.673	89.05	90.33	90.84	100.93	96.52	92.41	96.62	90.0733	2958	3048	2980	3490	3298	3174	3320.67	2995.33	0.107602	0.0890163	0.999443
11169	'WDHD1'	mRNA	8.82	7.8	8.61	9.01	7.9	7.87	8.26	8.41	6.39	5.8	6.32	6.38	5.77	5.75	5.96667	6.17	514	501	505	541	492	498	510.333	506.667	-0.0308973	0.75312	0.999443
1117	'CHI3L2'	mRNA	0	0	0	0	0.07	0	0.0233333	0	0	0	0	0	0.05	0	0.0166667	0	0	0	0	0	1	0	0.333333	0	0.92125	0.82138	0.999443
11170	'FAM107A'	mRNA	0	0	0	0	0.03	0	0.01	0	0	0	0	0	0.02	0	0.00666667	0	0	0	0	0	1	0	0.333333	0	0.92125	0.82138	0.999443
11171	'STRAP'	mRNA	180.99	152.17	168.18	176.12	156.96	156.54	163.207	167.113	131.23	113.14	123.48	124.73	114.62	114.43	117.927	122.617	3216	2876	2958	3193	2876	2891	2986.67	3016.67	-0.0560447	0.42668	0.999443
11173	'ADAMTS7'	mRNA	7.28	8.86	6.89	7.55	7.33	7.81	7.56333	7.67667	5.28	6.58	5.06	5.35	5.35	5.71	5.47	5.64	413	544	387	443	437	471	450.333	448	-0.0309612	0.803278	0.999443
11174	'ADAMTS6'	mRNA	0.32	0.06	0.18	0.32	0.14	0.26	0.24	0.186667	0.23	0.05	0.13	0.22	0.1	0.19	0.17	0.136667	23	4	12	21	7	17	15	13	0.158533	0.789374	0.999443
11176	'BAZ2A'	mRNA	38.26	33.69	32.79	35.34	36.53	34.1	35.3233	34.9133	27.74	25.05	24.07	25.03	26.67	24.93	25.5433	25.62	3141	2921	2827	2980	3049	2855	2961.33	2963	-0.0409652	0.552109	0.999443
11177	'BAZ1A'	mRNA	9.01	9.16	9.87	12.11	9.59	9.12	10.2733	9.34667	6.54	6.81	7.25	8.58	7	6.67	7.41667	6.86667	540	586	582	737	592	564	631	569.333	0.105252	0.322583	0.999443
11179	'ZNF277'	mRNA	16.36	14.91	17	15.61	15.41	16.01	15.6767	16.09	11.86	11.08	12.48	11.06	11.25	11.7	11.3367	11.8067	342	324	357	323	325	357	335	341	-0.0660103	0.579186	0.999443
11180	'WDR6'	mRNA	33.52	33.1	31.05	36.29	30.38	32.47	33.0467	32.5567	24.31	24.61	22.8	25.7	22.18	23.74	23.8733	23.9067	1415	1486	1299	1559	1322	1421	1434	1400	-0.00647478	0.935938	0.999443
11181	'TREH'	mRNA	0.04	0	0	0	0.04	0	0.0133333	0.0133333	0.03	0	0	0	0.03	0	0.01	0.01	1	0	0	0	1	0	0.333333	0.333333	-0.0405184	0.990082	0.999443
11182	'SLC2A6'	mRNA	25.26	25.45	23.73	26.45	26.86	27.47	26.9267	24.8133	18.31	18.92	17.42	18.73	19.61	20.08	19.4733	18.2167	591	662	539	658	662	648	656	597.333	0.0957227	0.329285	0.999443
11183	'MAP4K5'	mRNA	15.43	13.06	17.85	16.51	14.82	14.24	15.19	15.4467	11.19	9.71	13.11	11.69	10.82	10.41	10.9733	11.3367	694	624	798	759	688	665	704	705.333	-0.0457609	0.665343	0.999443
11184	'MAP4K1'	mRNA	0.15	0.29	0.46	0.34	0.48	0.59	0.47	0.3	0.11	0.21	0.34	0.24	0.35	0.43	0.34	0.22	4	8	12	9	13	16	12.6667	8	0.623849	0.308601	0.999443
11185	'INMT'	mRNA	0.12	0.11	0.04	0.08	0.04	0.04	0.0533333	0.09	0.09	0.08	0.03	0.05	0.03	0.03	0.0366667	0.0666667	3	3	1	2	1	1	1.33333	2.33333	-0.848875	0.539902	0.999443
11186	'RASSF1'	mRNA	45.48	46.49	44.94	48.04	48.09	48.76	48.2967	45.6367	32.97	34.57	33	34.02	35.11	35.65	34.9267	33.5133	803	885	787	861	875	912	882.667	825	0.058012	0.507623	0.999443
11187	'PKP3'	mRNA	53.2	57.67	49.22	59.23	50.24	55.59	55.02	53.3633	38.57	42.87	36.14	41.95	36.69	40.64	39.76	39.1933	1501	1731	1377	1705	1462	1628	1598.33	1536.33	0.0168133	0.848638	0.999443
11188	'NISCH'	mRNA	28.62	29.57	26.28	29.69	26.69	33.34	29.9067	28.1567	20.75	21.98	19.3	21.03	19.49	24.37	21.63	20.6767	1285	1430	1167	1282	1228	1454	1321.33	1294	-0.00857635	0.92641	0.999443
11189	'CELF3'	mRNA	0	0.01	0.01	0	0.01	0	0.00333333	0.00666667	0	0.01	0.01	0	0.01	0	0.00333333	0.00666667	0	1	1	0	1	0	0.333333	0.666667	-0.938064	0.72349	0.999443
1119	'CHKA'	mRNA	18.68	18.1	17.31	18.34	17.23	18.78	18.1167	18.03	13.54	13.46	12.71	12.99	12.58	13.73	13.1	13.2367	509	528	469	510	486	532	509.333	502	-0.0189476	0.8515	0.999443
11190	'CEP250'	mRNA	19.35	22.45	18.56	21.1	19.92	20.81	20.61	20.12	14.03	16.69	13.63	14.95	14.55	15.21	14.9033	14.7833	1696	1963	1544	1833	1728	1861	1807.33	1734.33	0.0202209	0.812948	0.999443
11193	'WBP4'	mRNA	7.97	6.82	5.9	8.14	7.11	8.05	7.76667	6.89667	5.78	5.07	4.33	5.77	5.19	5.88	5.61333	5.06	187	170	137	195	172	196	187.667	164.667	0.148732	0.351341	0.999443
11194	'ABCB8'	mRNA	23.54	25.31	22.16	25.72	24.24	23.99	24.65	23.67	17.07	18.82	16.27	18.21	17.7	17.54	17.8167	17.3867	1142	1307	1068	1273	1213	1207	1231	1172.33	0.0305676	0.718012	0.999443
11196	'SEC23IP'	mRNA	13.2	8.83	12.11	13.11	11.23	10.34	11.56	11.38	9.57	6.57	8.89	9.28	8.2	7.56	8.34667	8.34333	658	471	598	665	573	540	592.667	575.667	-0.00135919	0.991094	0.999443
11198	'SUPT16H'	mRNA	56.43	46.92	54.4	59.83	52.4	51.85	54.6933	52.5833	40.91	34.88	39.94	42.38	38.26	37.9	39.5133	38.5767	2605	2303	2494	2822	2493	2484	2599.67	2467.33	0.0331389	0.659559	0.999443
11199	'ANXA10'	mRNA	0.15	0	0.16	0	0	0	0	0.103333	0.11	0	0.11	0	0	0	0	0.0733333	2	0	2	0	0	0	0	1.33333	-2.90524	0.235849	0.999443
112	'ADCY6'	mRNA	31.48	29.73	26.97	32.26	30.8	31.35	31.47	29.3933	22.82	22.1	19.8	22.85	22.49	22.91	22.75	21.5733	2026	2037	1725	2120	2046	2095	2087	1929.33	0.0737132	0.334473	0.999443
1120	'CHKB'	mRNA	14.81	18.51	14.4	14.38	15.09	18.07	15.8467	15.9067	10.74	13.76	10.57	10.19	11.02	13.21	11.4733	11.69	198	263	190	196	208	251	218.333	217	-0.0285875	0.858012	0.999443
11200	'CHEK2'	mRNA	26.3	24.53	24.2	22.88	22.72	23.52	23.04	25.01	19.07	18.24	17.77	16.21	16.59	17.2	16.6667	18.36	451	452	415	392	410	420	407.333	439.333	-0.148578	0.165965	0.999443
11201	'POLI'	mRNA	2.19	1.57	1.65	1.94	1.71	1.93	1.86	1.80333	1.59	1.17	1.21	1.37	1.25	1.41	1.34333	1.32333	100	62	75	95	73	79	82.3333	79	0.0167651	0.942495	0.999443
11202	'KLK8'	mRNA	0	0	0.49	0	0	0	0	0.163333	0	0	0.36	0	0	0	0	0.12	0	0	1	0	0	0	0	0.333333	-1.0023	0.805965	0.999443
1121	'CHM'	mRNA	9.81	8.92	10.86	11.59	9.92	8.66	10.0567	9.86333	7.12	6.63	7.98	8.21	7.24	6.33	7.26	7.24333	467.22	437.74	518.39	548.74	500.12	433.29	494.05	474.45	0.0156624	0.890765	0.999443
11211	'FZD10'	mRNA	3.15	3.52	3.93	4.05	4.33	4.02	4.13333	3.53333	2.28	2.62	2.88	2.87	3.16	2.94	2.99	2.59333	105	125	130	138	149	139	142	120	0.202443	0.249754	0.999443
11212	'PLPBP'	mRNA	16.62	15.82	18.98	16.31	16.5	15.33	16.0467	17.14	12.05	11.76	13.94	11.55	12.05	11.21	11.6033	12.5833	375	371	419	380	376	358	371.333	388.333	-0.105982	0.349656	0.999443
11214	'AKAP13'	mRNA	6.91	6.58	7.42	7.31	6.74	6.93	6.99333	6.97	5.01	4.9	5.45	5.18	4.92	5.07	5.05667	5.12	890	852	910	971	886	937	931.333	884	0.0338482	0.687139	0.999443
11215	'AKAP11'	mRNA	3.07	2.21	3.32	2.9	3.3	3.01	3.07	2.86667	2.23	1.64	2.44	2.05	2.41	2.2	2.22	2.10333	304	249	349	311	301	317	309.667	300.667	0.000422	0.997554	0.999549
11216	'AKAP10'	mRNA	11.12	9.53	9.75	10.9	10.13	9.45	10.16	10.1333	8.06	7.09	7.16	7.72	7.4	6.91	7.34333	7.43667	465	423	405	464	437	410	437	431	-0.0210295	0.84498	0.999443
11218	'DDX20'	mRNA	14.67	11.75	14.48	17.04	14.46	14.22	15.24	13.6333	10.64	8.74	10.63	12.07	10.56	10.39	11.0067	10.0033	541	461	530	641	550	544	578.333	510.667	0.136863	0.197606	0.999443
11219	'TREX2'	mRNA	0	0.09	0	0.09	0.18	0	0.09	0.03	0	0.06	0	0.06	0.13	0	0.0633333	0.02	0	1	0	1	2	0	1	0.333333	1.44081	0.548263	0.999443
1122	'CHML'	mRNA	6.09	5	6.94	6.81	4.91	5.22	5.64667	6.01	4.42	3.72	5.1	4.83	3.59	3.81	4.07667	4.41333	458	400	519	523	381	407	437	459	-0.115838	0.373345	0.999443
11221	'DUSP10'	mRNA	5.47	5.84	5.98	5.07	6.38	4.99	5.48	5.76333	3.97	4.34	4.39	3.59	4.66	3.64	3.96333	4.23333	142.37	165	157	138.96	173	136	149.32	154.79	-0.0931669	0.583305	0.999443
11222	'MRPL3'	mRNA	145.47	121.83	147.16	149.86	139.31	126.84	138.67	138.153	105.48	90.58	108.05	106.13	101.73	92.72	100.193	101.37	2321	2067	2321	2438	2292	2102	2277.33	2236.33	-0.0159903	0.838938	0.999443
11223	'MST1L'	mRNA	0.27	0.27	0.23	0.3	0.26	0.49	0.35	0.256667	0.19	0.2	0.17	0.21	0.19	0.36	0.253333	0.186667	13	14	11	15	13	25	17.6667	12.6667	0.442372	0.373005	0.999443
11224	'RPL35'	mRNA	12001	13230.5	11589	11873.8	12981.7	12711	12522.1	12273.5	8701.63	9836.64	8508.7	8409.2	9479.59	9291.9	9060.23	9015.66	25139	29252	23023	25146	27976	27909	27010.3	25804.7	0.0284122	0.732542	0.999443
11226	'GALNT6'	mRNA	26.47	25.51	24.8	28.2	25.93	23.48	25.87	25.5933	19.19	18.97	18.21	19.97	18.94	17.16	18.69	18.79	1327	1352	1233	1447	1345	1232	1341.33	1304	-0.000416	0.995825	0.999443
112267857	'LOC112267857'	mRNA	0.17	0.63	0.51	0.82	0.16	0.16	0.38	0.436667	0.12	0.47	0.38	0.58	0.12	0.12	0.273333	0.323333	1	4	3	5	1	1	2.33333	2.66667	-0.246282	0.840311	0.999443
112267859	'LOC112267859'	mRNA	0	0.04	0	0	0	0.04	0.0133333	0.0133333	0	0.03	0	0	0	0.03	0.01	0.01	0	1	0	0	0	1	0.333333	0.333333	-0.0405185	0.990099	0.999443
112267874	'LOC112267874'	mRNA	0.11	0.14	0.25	0.24	0.05	0.24	0.176667	0.166667	0.08	0.11	0.18	0.17	0.04	0.17	0.126667	0.123333	2.3	3.28	5.42	5.41	1.14	5.32	3.95667	3.66667	0.0893878	0.930348	0.999443
112267876	'LOC112267876'	mRNA	11.45	9.8	5.99	11.9	14.1	15.36	13.7867	9.08	8.3	7.28	4.4	8.43	10.3	11.23	9.98667	6.66	42.81	38.82	21.66	45.21	54.35	60	53.1867	34.43	0.618738	0.048421	0.999443
112267930	'LOC112267930'	mRNA	0.81	0.31	0.33	0	0.16	0.16	0.106667	0.483333	0.59	0.23	0.24	0	0.12	0.11	0.0766667	0.353333	5	2	2	0	1	1	0.666667	3	-2.20231	0.158094	0.999443
112267939	'LOC112267939'	mRNA	0.28	0.24	0.11	0.4	0	0.36	0.253333	0.21	0.21	0.18	0.08	0.28	0	0.26	0.18	0.156667	7.61	6.99	2.87	11	0	9.95	6.98333	5.82333	0.369147	0.683652	0.999443
112267940	'LOC112267940'	mRNA	0.17	0	0.54	0	0.27	0.12	0.13	0.236667	0.12	0	0.4	0	0.2	0.09	0.0966667	0.173333	5.39	0	17.14	0	9	4.06	4.35333	7.51	-0.79623	0.697553	0.999443
112267951	'LOC112267951'	mRNA	0	0	0	0	0	0.03	0.01	0	0	0	0	0	0	0.02	0.00666667	0	0	0	0	0	0	1	0.333333	0	0.92125	0.82138	0.999443
112267959	'LOC112267959'	mRNA	0	8.38	0	0	0	0	0	2.79333	0	6.23	0	0	0	0	0	2.07667	0	1	0	0	0	0	0	0.333333	-1.0023	0.805965	0.999443
112267992	'LOC112267992'	mRNA	0	0	0.02	0	0	0	0	0.00666667	0	0	0.02	0	0	0	0	0.00666667	0	0	1	0	0	0	0	0.333333	-1.0023	0.805965	0.999443
112268052	'LOC112268052'	mRNA	0.36	0.25	0.27	0.35	0.18	0.26	0.263333	0.293333	0.26	0.19	0.2	0.25	0.13	0.19	0.19	0.216667	4	3	3	4	2	3	3	3.33333	-0.196054	0.849524	0.999443
112268119	'LOC112268119'	mRNA	0	0.05	0	0	0	0	0	0.0166667	0	0.04	0	0	0	0	0	0.0133333	0	1	0	0	0	0	0	0.333333	-1.0023	0.805965	0.999443
112268131	'LOC112268131'	mRNA	0.4	0.37	0.46	0.61	0.59	0.16	0.453333	0.41	0.29	0.28	0.34	0.43	0.43	0.12	0.326667	0.303333	7	7	8	11	11	3	8.33333	7.33333	0.139404	0.840631	0.999443
112268184	'LOC112268184'	mRNA	0.03	0.09	0.06	0.06	0.12	0.06	0.08	0.06	0.02	0.07	0.05	0.04	0.09	0.04	0.0566667	0.0466667	1	3	2	2	4	2	2.66667	2	0.378985	0.755586	0.999443
112268219	'LOC112268219'	mRNA	0.04	0.18	0.04	0.15	0.04	0.04	0.0766667	0.0866667	0.03	0.13	0.03	0.1	0.03	0.03	0.0533333	0.0633333	1	5	1	4	1	1	2	2.33333	-0.268514	0.838846	0.999443
112268237	'LOC112268237'	mRNA	0	0	0.09	0.08	0	0.08	0.0533333	0.03	0	0	0.06	0.06	0	0.06	0.04	0.02	0	0	1	1	0	1	0.666667	0.333333	0.84846	0.750029	0.999443
112268238	'LOC112268238'	mRNA	7.25	6.16	5.32	6.09	6.33	6.94	6.45333	6.24333	5.26	4.58	3.9	4.31	4.62	5.07	4.66667	4.58	113	101	82	96	102	113	103.667	98.6667	0.0328785	0.870173	0.999443
112268260	'LOC112268260'	mRNA	0.51	0.41	0.62	0.18	0.49	0.6	0.423333	0.513333	0.37	0.3	0.45	0.13	0.36	0.44	0.31	0.373333	14	12	17	5	14	17.27	12.09	14.3333	-0.29117	0.596071	0.999443
112268342	'LOC112268342'	mRNA	1.16	1.31	1.05	1.01	0.72	1.17	0.966667	1.17333	0.84	0.97	0.77	0.72	0.53	0.86	0.703333	0.86	30.89	37.19	27.86	27.55	19.81	32.48	26.6133	31.98	-0.308889	0.393735	0.999443
112268347	'LOC112268347'	mRNA	0	0.02	0	0	0.03	0.03	0.02	0.00666667	0	0.02	0	0	0.02	0.02	0.0133333	0.00666667	0	0.5	0	0	0.5	0.5	0.333333	0.166667
112268350	'LOC112268350'	mRNA	0.49	0.32	0.42	0.33	0.36	0.47	0.386667	0.41	0.35	0.24	0.31	0.23	0.27	0.34	0.28	0.3	13	9.01	11	9	10	12.99	10.6633	11.0033	-0.129663	0.8202	0.999443
112268384	'LOC112268384'	mRNA	0	0.03	0	0.03	0	0.03	0.02	0.01	0	0.02	0	0.02	0	0.02	0.0133333	0.00666667	0	1	0	1	0	1	0.666667	0.333333	0.848443	0.750707	0.999443
112268395	'LOC112268395'	mRNA	0	0	0	0	0.04	0.08	0.04	0	0	0	0	0	0.03	0.06	0.03	0	0	0	0	0	1	2	1	0	2.41785	0.379607	0.999443
112268437	'LOC112268437'	mRNA	0.67	0.7	1.15	0.89	1.4	1.27	1.18667	0.84	0.49	0.52	0.84	0.63	1.02	0.93	0.86	0.616667	27.78	30.84	47.21	37.72	59.77	54.79	50.76	35.2767	0.489273	0.129372	0.999443
112268444	'LOC112268444'	mRNA	0	0.02	0	0	0	0	0	0.00666667	0	0.02	0	0	0	0	0	0.00666667	0	1	0	0	0	0	0	0.333333	-1.0023	0.805965	0.999443
11227	'GALNT5'	mRNA	0.01	0	0	0.03	0	0	0.01	0.00333333	0.01	0	0	0.02	0	0	0.00666667	0.00333333	1	0	0	3	0	0	1	0.333333	1.41012	0.583894	0.999443
11228	'RASSF8'	mRNA	14.77	12.57	14.96	17.05	17.28	15.5	16.61	14.1	10.71	9.35	10.98	12.07	12.62	11.33	12.0067	10.3467	826.62	737	870	968	992	914.25	958.083	811.207	0.198943	0.0322108	0.999443
1123	'CHN1'	mRNA	7.74	7.12	7.05	9.17	7.55	6.16	7.62667	7.30333	5.61	5.29	5.18	6.5	5.52	4.5	5.50667	5.36	193	189	175	232	200	160	197.333	185.667	0.0454585	0.771973	0.999443
11230	'PRAF2'	mRNA	94.17	96.98	96.75	99.71	105.61	97.94	101.087	95.9667	68.28	72.1	71.04	70.61	77.12	71.6	73.11	70.4733	1036	1134	1049	1118	1198	1120	1145.33	1073	0.0544778	0.507115	0.999443
11231	'SEC63'	mRNA	41.25	38.01	46.48	46.3	42.97	41.48	43.5833	41.9133	29.91	28.26	34.13	32.79	31.38	30.32	31.4967	30.7667	1578	1516	1725	1777	1672	1623	1690.67	1606.33	0.031798	0.687545	0.999443
11232	'POLG2'	mRNA	13.25	10.79	10.98	10.44	10.19	12.63	11.0867	11.6733	9.61	8.02	8.06	7.39	7.44	9.23	8.02	8.56333	193	167	158	155	153	191	166.333	172.667	-0.0930331	0.569218	0.999443
11234	'HPS5'	mRNA	10.32	9.15	9.74	10.87	8.72	9.22	9.60333	9.73667	7.48	6.8	7.15	7.7	6.37	6.74	6.93667	7.14333	508	482	476	551	445	475	490.333	488.667	-0.0372137	0.724074	0.999443
11235	'PDCD10'	mRNA	86.14	78.76	89.69	89.22	77.18	73.39	79.93	84.8633	62.46	58.55	65.85	63.19	56.36	53.65	57.7333	62.2867	937	908	965	991	874	837	900.667	936.667	-0.0988433	0.256833	0.999443
11236	'RNF139'	mRNA	10.82	8.37	11.59	10.82	11.21	8.55	10.1933	10.26	7.85	6.23	8.51	7.66	8.19	6.25	7.36667	7.53	351	289	373	358	375	288	340.333	337.667	-0.0310252	0.819912	0.999443
11237	'RNF24'	mRNA	10.05	7.98	8.16	8.75	7.84	7.75	8.11333	8.73	7.28	5.93	5.99	6.2	5.73	5.67	5.86667	6.4	602	556	597	569	535	527	543.667	585	-0.147108	0.127785	0.999443
11238	'CA5B'	mRNA	10.75	9.13	11.36	9.83	10.72	10.56	10.37	10.4133	7.79	6.79	8.34	6.96	7.83	7.72	7.50333	7.64	781	706	820	729	803	796	776	769	-0.0271174	0.781725	0.999443
112398	'EGLN2'	mRNA	34.5	36.97	29.77	33.68	35.99	35.32	34.9967	33.7467	25.02	27.49	21.86	23.85	26.28	25.82	25.3167	24.79	700	798	598	697	753	744	731.333	698.667	0.0278577	0.791684	0.999443
112399	'EGLN3'	mRNA	5.72	4.4	5.55	4.75	4.4	5.14	4.76333	5.22333	4.15	3.27	4.07	3.37	3.21	3.76	3.44667	3.83	154	126	148	130	122	143	131.667	142.667	-0.156636	0.367274	0.999443
11240	'PADI2'	mRNA	0.2	0.13	0.23	0.28	0.25	0.19	0.24	0.186667	0.14	0.1	0.17	0.2	0.18	0.14	0.173333	0.136667	7	5	8	10	9	7	8.66667	6.66667	0.334569	0.619646	0.999443
11243	'PMF1'	mRNA	74.69	69.48	73.01	77.13	73.68	74.64	75.15	72.3933	54.16	51.66	53.6	54.62	53.8	54.56	54.3267	53.14	707.09	698.69	679.41	743.13	718.65	734.06	731.947	695.063	0.0343763	0.693189	0.999443
11244	'ZHX1'	mRNA	12.02	10.36	11.96	13.51	10.7	10.92	11.71	11.4467	8.71	7.7	8.78	9.56	7.81	7.98	8.45	8.39667	621	573	622	716.84	573	587	625.613	605.333	0.00385562	0.97005	0.999443
112441434	'SHLD3'	mRNA	5.25	4.33	6.46	5.77	4.95	5.25	5.32333	5.34667	3.8	3.22	4.74	4.09	3.61	3.84	3.84667	3.92	74	65	90	83	72	77	77.3333	76.3333	-0.0240667	0.915252	0.999443
11245	'GPR176'	mRNA	6.54	5.73	6.68	7.09	6.03	6.17	6.43	6.31667	4.74	4.26	4.91	5.02	4.4	4.51	4.64333	4.63667	301	283	293	328	279	294	300.333	292.333	-0.00286365	0.981344	0.999443
112464	'CAVIN3'	mRNA	39.82	42.17	37.04	43.63	43.34	39.88	42.2833	39.6767	28.88	31.35	27.19	30.9	31.65	29.15	30.5667	29.14	336	378	307	375	377	350	367.333	340.333	0.07038	0.549619	0.999443
11247	'NXPH4'	mRNA	28.01	33.67	29.87	25.8	27.89	25.62	26.4367	30.5167	20.31	25.03	21.93	18.27	20.36	18.73	19.12	22.4233	472	583	503	448	484	453	461.667	519.333	-0.20916	0.056126	0.999443
112476	'PRRT2'	mRNA	2.79	2.45	2.33	2.73	1.73	3.96	2.80667	2.52333	2.02	1.82	1.71	1.94	1.26	2.9	2.03333	1.85	72	72	61	70	39	83	64	68.3333	-0.135514	0.612846	0.999443
112479	'ERI2'	mRNA	3.41	2.97	4.05	4.3	3.96	2.97	3.74333	3.47667	2.47	2.21	2.98	3.04	2.89	2.17	2.7	2.55333	122	113	142	157	146	108	137	125.667	0.0810431	0.665726	0.999443
11248	'NXPH3'	mRNA	0.49	0.35	0.37	0.31	0.28	0.32	0.303333	0.403333	0.35	0.26	0.27	0.22	0.2	0.24	0.22	0.293333	29	22	22	19	17	20	18.6667	24.3333	-0.422907	0.297929	0.999443
112483	'SAT2'	mRNA	46.99	42.2	39.21	42.4	42.92	43.81	43.0433	42.8	34.07	31.38	28.79	30.03	31.34	32.02	31.13	31.4133	346	341	285	320	331	340	330.333	324	-0.0111415	0.927192	0.999443
112487	'DTD2'	mRNA	4.21	2.85	3.62	3.26	2.76	3.35	3.12333	3.56	3.05	2.12	2.65	2.31	2.01	2.45	2.25667	2.60667	114	82	97	90	77	94.03	87.01	97.6667	-0.208205	0.323343	0.999443
112495	'GTF3C6'	mRNA	44.78	35.68	42.49	44.85	45.62	37.51	42.66	40.9833	32.47	26.52	31.2	31.77	33.32	27.42	30.8367	30.0633	259	219	240	264	272	226	254	239.333	0.0445786	0.745837	0.999443
11251	'PTGDR2'	mRNA	0.07	0.1	0.03	0	0	0	0	0.0666667	0.05	0.07	0.03	0	0	0	0	0.05	2	3	1	0	0	0	0	2	-3.47813	0.0863742	0.999443
11252	'PACSIN2'	mRNA	49.55	45.22	45.41	49.85	45.99	49.36	48.4	46.7267	35.92	33.62	33.34	35.31	33.58	36.09	34.9933	34.2933	1633	1586	1485	1679	1564	1691	1644.67	1568	0.0285576	0.699355	0.999443
11253	'MAN1B1'	mRNA	82.59	83.16	75.77	86.6	82.51	83.5	84.2033	80.5067	59.89	61.83	55.63	61.33	60.25	61.04	60.8733	59.1167	2248	2420	2044	2406	2323	2373	2367.33	2237.33	0.0418107	0.567054	0.999443
11255	'HRH3'	mRNA	0	0	0	0.04	0.04	0.04	0.04	0	0	0	0	0.03	0.03	0.03	0.03	0	0	0	0	1	1	1	1	0	2.40231	0.353855	0.999443
112574	'SNX18'	mRNA	2.43	2	2.2	2.13	2.55	2.34	2.34	2.21	1.76	1.49	1.62	1.51	1.86	1.71	1.69333	1.62333	125	115	120	117	128	117	120.667	120	-0.0321858	0.856893	0.999443
112577461	'OOSP3'	mRNA	0	0.2	0.44	0	0.21	0	0.07	0.213333	0	0.15	0.33	0	0.15	0	0.05	0.16	0	1	2	0	1	0	0.333333	1	-1.52786	0.521462	0.999443
11258	'DCTN3'	mRNA	109.19	130.41	115.28	114.4	115.76	125.6	118.587	118.293	79.17	96.95	84.64	81.02	84.53	91.81	85.7867	86.92	679	861	702	724	742	813	759.667	747.333	-0.0150356	0.88542	0.999443
11260	'XPOT'	mRNA	48.28	39.62	48.28	48.92	45.7	41.73	45.45	45.3933	35.01	29.46	35.45	34.65	33.37	30.51	32.8433	33.3067	3259	2846	3238	3370	3181	2922	3157.67	3114.33	-0.0223056	0.774721	0.999443
11261	'CHP1'	mRNA	55.02	55.76	60.98	61.12	56.66	54.86	57.5467	57.2533	39.9	41.46	44.77	43.28	41.37	40.11	41.5867	42.0433	1018	1083	1251	1198	1158	1153.11	1169.7	1117.33	0.0242263	0.790843	0.999443
112611	'RWDD2A'	mRNA	3.85	3.02	3.41	3.51	3.65	2.97	3.37667	3.42667	2.79	2.24	2.5	2.48	2.66	2.17	2.43667	2.51	154	130	139	143	151	123	139	141	-0.0615503	0.719707	0.999443
112616	'CMTM7'	mRNA	0.23	0.06	0.06	0.11	0.06	0.3	0.156667	0.116667	0.16	0.04	0.05	0.08	0.04	0.22	0.113333	0.0833333	4	1	1	2	1	4	2.33333	2	0.184922	0.886228	0.999443
11262	'SP140'	mRNA	0	0	0.16	0	0	0	0	0.0533333	0	0	0.12	0	0	0	0	0.04	0	0	1	0	0	0	0	0.333333	-1.0023	0.805965	0.999443
11264	'PXMP4'	mRNA	5.71	5.18	5.52	6.17	6.03	6.17	6.12333	5.47	4.14	3.85	4.05	4.37	4.4	4.51	4.42667	4.01333	342	330	328.17	377.18	372.17	383.01	377.453	333.39	0.138515	0.216477	0.999443
11266	'DUSP12'	mRNA	35.48	39.17	33.83	38.56	43.41	36.25	39.4067	36.16	25.73	29.12	24.84	27.31	31.7	26.5	28.5033	26.5633	403	470	378	447	507	425	459.667	417	0.101632	0.385672	0.999443
11267	'SNF8'	mRNA	103.49	117.37	99.74	118.46	106.83	109.25	111.513	106.867	75.04	87.26	73.23	83.9	78.01	79.87	80.5933	78.51	1386	1613	1314	1572	1439	1489	1500	1437.67	0.0211376	0.799989	0.999443
11269	'DDX19B'	mRNA	27.1	29.43	28.65	32.69	32.73	31.4	32.2733	28.3933	19.65	21.88	21.03	23.15	23.9	22.95	23.3333	20.8533	902.14	1042.45	945.36	1110.23	1123.85	1084.73	1106.27	963.317	0.159271	0.057537	0.999443
112694756	'LOC112694756'	mRNA	31.99	28.14	39.02	30.55	25.22	28.78	28.1833	33.05	23.2	20.92	28.65	21.64	18.41	21.04	20.3633	24.2567	771.24	714.9	923.69	740.83	627.62	711.59	693.347	803.277	-0.255725	0.0192206	0.999443
11270	'NRM'	mRNA	84.63	83.25	88.29	74.21	89.11	76.61	79.9767	85.39	61.36	61.89	64.82	52.56	65.07	56.01	57.88	62.69	1143	1210	1152	1041	1227	1065	1111	1168.33	-0.111673	0.210747	0.999443
112703	'FAM71E1'	mRNA	2.25	2.33	2.2	1.6	2.43	1.45	1.82667	2.26	1.63	1.73	1.61	1.13	1.77	1.06	1.32	1.65667	27	28	26	20	28	18	22	27	-0.334514	0.384237	0.999443
11272	'PRR4'	mRNA	11.21	10.59	12.27	9.85	9.41	8.41	9.22333	11.3567	8.13	7.87	9.01	6.98	6.87	6.15	6.66667	8.33667	37	37	39	33	32	29	31.3333	37.6667	-0.306923	0.336095	0.999443
112724	'RDH13'	mRNA	10.75	12.38	8.94	11.73	11.59	11.11	11.4767	10.69	7.8	9.21	6.56	8.31	8.46	8.12	8.29667	7.85667	215	261	177.04	233	226.79	221	226.93	217.68	0.0194369	0.897185	0.999443
11273	'ATXN2L'	mRNA	121.47	131.73	129.66	132.83	146.61	136.1	138.513	127.62	88.08	97.94	95.19	94.07	107.06	99.49	100.207	93.7367	5081	5873	5414	5665	6330	5943	5979.33	5456	0.0931765	0.217167	0.999443
11274	'USP18'	mRNA	2.29	2.54	2.66	2.53	2.42	2.69	2.54667	2.49667	1.66	1.89	1.95	1.79	1.77	1.97	1.84333	1.83333	41	51	49	47	44	52	47.6667	47	-0.0200053	0.942484	0.999443
11275	'KLHL2'	mRNA	9.87	7.37	10.27	8.66	8.64	9.93	9.07667	9.17	7.16	5.48	7.54	6.13	6.31	7.26	6.56667	6.72667	310	246	317	279	283	299	287	291	-0.0610754	0.650849	0.999443
112752	'IFT43'	mRNA	46.74	39.89	44.91	41.32	36.3	36.75	38.1233	43.8467	33.89	29.66	32.97	29.26	26.51	26.86	27.5433	32.1733	291	263	273	262	233	238	244.333	275.667	-0.215559	0.0935876	0.999443
112755	'STX1B'	mRNA	1.59	1.98	1.38	1.45	1.47	1.91	1.61	1.65	1.15	1.47	1.01	1.03	1.08	1.39	1.16667	1.21	73	97	63	68	70	91	76.3333	77.6667	-0.062131	0.793601	0.999443
11276	'SYNRG'	mRNA	5.45	4.87	4.7	7.47	5.85	5.83	6.38333	5.00667	3.95	3.62	3.45	5.29	4.27	4.26	4.60667	3.67333	304	316	300	396	343	342	360.333	306.667	0.191062	0.101563	0.999443
11277	'TREX1'	mRNA	58.18	61.27	54.14	57	54.48	59.02	56.8333	57.8633	42.19	45.56	39.75	40.37	39.78	43.15	41.1	42.5	534.62	598.25	489.31	533.61	516.11	563.99	537.903	540.727	-0.0473503	0.648651	0.999443
112770	'GLMP'	mRNA	45.18	45.76	51.19	45.64	46.91	44.1	45.55	47.3767	32.76	34.02	37.58	32.33	34.26	32.23	32.94	34.7867	653	689	730	657	698	668	674.333	690.667	-0.0749456	0.428173	0.999443
11278	'KLF12'	mRNA	3.85	2.41	4.46	3.93	4.29	3.59	3.93667	3.57333	2.79	1.79	3.28	2.78	3.14	2.62	2.84667	2.62	334	280	418	328	367	328	341	344	-0.0545979	0.703977	0.999443
11279	'KLF8'	mRNA	0	0	0	0	0	0.01	0.00333333	0	0	0	0	0	0	0.01	0.00333333	0	0	0	0	0	0	1	0.333333	0	0.92125	0.82138	0.999443
1128	'CHRM1'	mRNA	0.12	0	0.15	0.16	0.04	0.08	0.0933333	0.09	0.09	0	0.11	0.11	0.03	0.06	0.0666667	0.0666667	3	0	4	4	1	2	2.33333	2.33333	-0.0563564	0.964999	0.999443
11280	'SCN11A'	mRNA	0.09	0.04	0.07	0.02	0.01	0.06	0.03	0.0666667	0.07	0.03	0.05	0.01	0.01	0.04	0.02	0.05	5.41	2.88	4	0.97	1	3.49	1.82	4.09667	-1.49278	0.242307	0.999443
112802	'KRT71'	mRNA	0	0	0	0.05	0.14	0	0.0633333	0	0	0	0	0.03	0.1	0	0.0433333	0	0	0	0	1	3	0	1.33333	0	2.82172	0.258339	0.999443
112812	'FDX2'	mRNA	28.57	32.94	26.62	26.62	29.94	32.94	29.8333	29.3767	20.72	24.49	19.55	18.85	21.87	24.08	21.6	21.5867	236	289	216	224	255	283	254	247	0.00299737	0.983815	0.999443
112817	'HOGA1'	mRNA	2.77	2.42	2.35	2.76	3.02	2.91	2.89667	2.51333	2.01	1.8	1.72	1.95	2.21	2.12	2.09333	1.84333	58	56	49	62	65	65	64	54.3333	0.19677	0.426645	0.999443
11282	'MGAT4B'	mRNA	196.75	209.07	182.76	214.68	209.78	210.99	211.817	196.193	142.66	155.44	134.18	152.04	153.19	154.24	153.157	144.093	4720	5338	4352	5265	5161	5254	5226.67	4803.33	0.0826071	0.25845	0.999443
11284	'PNKP'	mRNA	26.78	32.72	28.64	30.37	30.21	29.4	29.9933	29.38	19.41	24.33	21.03	21.51	22.06	21.49	21.6867	21.59	434	564	459	502	505	495	500.667	485.667	0.00434737	0.969025	0.999443
112840	'WDR89'	mRNA	4.45	3.64	5	4.92	4.44	4.44	4.6	4.36333	3.23	2.71	3.67	3.49	3.24	3.25	3.32667	3.20333	146	125	159	163	145	147	151.667	143.333	0.0390805	0.816389	0.999443
112849	'L3HYPDH'	mRNA	12.15	10.34	10	12.03	10.75	11.43	11.4033	10.83	8.81	7.69	7.34	8.52	7.85	8.35	8.24	7.94667	224	174	187	213	198	233	214.667	195	0.0982105	0.515628	0.999443
11285	'B4GALT7'	mRNA	31.09	32.86	26.76	29.78	31.15	30.62	30.5167	30.2367	22.54	24.43	19.64	21.09	22.75	22.39	22.0767	22.2033	494	555	420	483	511	505	499.667	489.667	-0.00930355	0.933956	0.999443
112858	'TP53RK'	mRNA	11.08	8.28	9.76	9.12	8.97	8.91	9	9.70667	8.03	6.16	7.17	6.46	6.55	6.51	6.50667	7.12	357	284	312	300	298	298	298.667	317.667	-0.129692	0.304774	0.999443
112869	'SGF29'	mRNA	29.22	32.36	29.79	30.81	32.56	30.63	31.3333	30.4567	21.19	24.06	21.87	21.82	23.78	22.39	22.6633	22.3733	290	342	292	313	334	318	321.667	308	0.0232456	0.849654	0.999443
112885	'PHF21B'	mRNA	0.08	0.1	0.06	0.03	0	0.05	0.0266667	0.08	0.06	0.08	0.04	0.02	0	0.03	0.0166667	0.06	3	4	2	1	0	1	0.666667	3	-2.21104	0.154193	0.999443
112936	'VPS26B'	mRNA	38.78	39.67	38.24	39.28	41.89	38.93	40.0333	38.8967	28.12	29.49	28.08	27.82	30.59	28.46	28.9567	28.5633	1413	1534	1376	1444	1544	1496	1494.67	1441	0.0135102	0.862602	0.999443
112937	'GLB1L3'	mRNA	0	0	0.1	0	0	0	0	0.0333333	0	0	0.07	0	0	0	0	0.0233333	0	0	2	0	0	0	0	0.666667	-1.91633	0.578101	0.999443
112939	'NACC1'	mRNA	42.43	44.76	46.6	42.74	43.1	42.32	42.72	44.5967	30.76	33.28	34.21	30.27	31.47	30.94	30.8933	32.75	2000	2245	2182	2056	2095	2069	2073.33	2142.33	-0.0874277	0.232466	0.999443
112942	'CFAP36'	mRNA	85.95	83.45	83.27	94.46	86.82	94.85	92.0433	84.2233	62.32	62.04	61.14	66.9	63.4	69.34	66.5467	61.8333	879	905	840	989	925	1005	973	874.667	0.113419	0.171186	0.999443
112950	'MED8'	mRNA	40.93	40.73	36.22	46.33	38.65	43.86	42.9467	39.2933	29.68	30.28	26.59	32.81	28.23	32.06	31.0333	28.85	746	794	661	853	730	823	802	733.667	0.0880246	0.355108	0.999443
112970	'KTI12'	mRNA	16.61	15.74	17.63	16.96	17.32	16.35	16.8767	16.66	12.04	11.7	12.94	12.01	12.65	11.95	12.2033	12.2267	265	267	278	276	285	271	277.333	270	-0.00192181	0.98773	0.999443
113	'ADCY7'	mRNA	9.82	9.41	9.16	9.68	8.78	11.11	9.85667	9.46333	7.12	6.99	6.73	6.86	6.41	8.12	7.13	6.94667	533	515	488	570	494	594	552.667	512	0.0696808	0.501455	0.999443
1130	'LYST'	mRNA	1.53	1.14	1.89	1.79	1.58	1.66	1.67667	1.52	1.11	0.85	1.39	1.27	1.15	1.22	1.21333	1.11667	224	177	276	267	238	252	252.333	225.667	0.117629	0.456031	0.999443
113000	'RPUSD1'	mRNA	52.91	56.34	50.37	54.7	51.65	57.79	54.7133	53.2067	38.37	41.89	36.99	38.74	37.72	42.25	39.57	39.0833	1034	1173	965	1094	1041	1167	1100.67	1057.33	0.018684	0.835259	0.999443
113026	'PLCD3'	mRNA	111.65	111.49	107.39	125.07	116.82	113.3	118.397	110.177	80.95	82.89	78.84	88.58	85.3	82.83	85.57	80.8933	4442	4768	4295	5093	4857.09	4647.99	4866.03	4501.67	0.0715858	0.259377	0.999443
11309	'SLCO2B1'	mRNA	0	0.02	0.17	0.02	0.02	0.05	0.03	0.0633333	0	0.02	0.13	0.02	0.02	0.03	0.0233333	0.05	0	1	7	1	1	2	1.33333	2.66667	-1.05016	0.471458	0.999443
1131	'CHRM3'	mRNA	0.26	0.39	0.51	0.53	0.49	0.57	0.53	0.386667	0.19	0.29	0.37	0.38	0.36	0.41	0.383333	0.283333	24.28	38.9	47.57	51.21	47.97	55.32	51.5	36.9167	0.447264	0.145296	0.999443
11311	'VPS45'	mRNA	23.91	21.23	22.32	24.88	21.26	22.21	22.7833	22.4867	17.33	15.79	16.39	17.62	15.52	16.24	16.46	16.5033	545	515	504	579	501	526	535.333	521.333	-0.00320932	0.974213	0.999443
113115	'MTFR2'	mRNA	14.15	11.34	13.83	13.82	11.41	11.23	12.1533	13.1067	10.26	8.43	10.15	9.79	8.33	8.21	8.77667	9.61333	208	173	206	211	172	172	185	195.667	-0.123896	0.420026	0.999443
11313	'LYPLA2'	mRNA	88.45	93.18	83.12	91.5	90.59	89.68	90.59	88.25	64.13	69.28	61.03	64.81	66.15	65.56	65.5067	64.8133	1352	1514	1258	1429	1432	1421	1427.33	1374.67	0.014845	0.854663	0.999443
113130	'CDCA5'	mRNA	72.7	64.39	64.82	62.44	73.03	68.26	67.91	67.3033	52.71	47.87	47.59	44.22	53.33	49.9	49.15	49.39	1614	1529	1396	1418	1639	1637	1564.67	1513	0.0103601	0.907321	0.999443
11314	'CD300A'	mRNA	0.1	0	0.2	0	0	0.09	0.03	0.1	0.07	0	0.15	0	0	0.07	0.0233333	0.0733333	1	0	2	0	0	1	0.333333	1	-1.53094	0.520391	0.999443
113146	'AHNAK2'	mRNA	13.53	12.71	11.77	15.4	13.16	13.53	14.03	12.67	9.81	9.45	8.64	10.9	9.61	9.89	10.1333	9.3	2692	2690	2327	3125	2702	2789	2872	2569.67	0.119463	0.113128	0.999443
11315	'PARK7'	mRNA	394.07	397.61	391.12	401.87	386.26	398.71	395.613	394.267	285.73	295.61	287.17	284.61	282.06	291.46	286.043	289.503	2969	3204	2949	3108	3020	3144	3090.67	3040.67	-0.0165011	0.801181	0.999443
11316	'COPE'	mRNA	290.21	329.65	295.11	297.47	305.67	312.74	305.293	304.99	210.42	245.09	216.67	210.67	223.21	228.62	220.833	224.06	2737	3300	2735	2858	2965	3072	2965	2924	-0.0185701	0.820038	0.999443
113174	'SAAL1'	mRNA	16.59	13.92	15.54	15.8	14.75	14.98	15.1767	15.35	12.03	10.35	11.41	11.19	10.77	10.95	10.97	11.2633	240	214	222	233	220	225	226	225.333	-0.0366561	0.786878	0.999443
113177	'IZUMO4'	mRNA	0.64	0.59	0.79	1.27	0.85	0.57	0.896667	0.673333	0.46	0.44	0.58	0.9	0.62	0.42	0.646667	0.493333	5	6	6	10	7	5	7.33333	5.66667	0.326873	0.655962	0.999443
113178	'SCAMP4'	mRNA	26.35	29.55	27.28	26.99	32.71	27.82	29.1733	27.7267	19.11	21.97	20.03	19.12	23.89	20.34	21.1167	20.37	648	774	667	680	830	712	740.667	696.333	0.0507373	0.634738	0.999443
113179	'ADAT3'	mRNA	11.54	13.2	12.09	13.68	11.63	14.14	13.15	12.2767	8.37	9.82	8.87	9.69	8.49	10.34	9.50667	9.02	163	200	166	192	167	200	186.333	176.333	0.0394414	0.799414	0.999443
113189	'CHST14'	mRNA	22.45	21.32	21.76	24.56	23.37	22.85	23.5933	21.8433	16.27	15.85	15.98	17.39	17.07	16.7	17.0533	16.0333	474	479	455	529	509	501	513	469.333	0.0877283	0.374108	0.999443
11319	'ECD'	mRNA	33.46	31.64	35.27	38.93	37.61	34.17	36.9033	33.4567	24.26	23.52	25.89	27.57	27.46	24.98	26.67	24.5567	905	882	935	1028	996	921	981.667	907.333	0.0721614	0.389688	0.999443
1132	'CHRM4'	mRNA	0.88	0.64	0.49	0.65	0.75	0.47	0.623333	0.67	0.63	0.48	0.36	0.46	0.55	0.35	0.453333	0.49	25	21	15	20	22	15	19	20.3333	-0.137357	0.750028	0.999443
11320	'MGAT4A'	mRNA	0.45	0.5	0.56	0.48	0.45	0.49	0.473333	0.503333	0.33	0.37	0.41	0.34	0.33	0.36	0.343333	0.37	40.46	47.6	49.96	43.69	42	45.91	43.8667	46.0067	-0.105832	0.709856	0.999443
113201	'GOLM2'	mRNA	25.56	25.23	26.9	29.1	27.25	32.56	29.6367	25.8967	18.53	18.76	19.75	20.61	19.9	23.8	21.4367	19.0133	905	817	993	1009	884	892	928.333	905	-0.00616853	0.948583	0.999443
11321	'GPN1'	mRNA	30.51	27.87	31.42	33.5	31.61	27.73	30.9467	29.9333	22.12	20.72	23.07	23.73	23.08	20.27	22.36	21.97	546	509	548	594	565	498	552.333	534.333	0.00594861	0.953507	0.999443
11322	'TMC6'	mRNA	104.43	105.34	93.4	102.89	110.16	106.65	106.567	101.057	75.72	78.31	68.57	72.87	80.44	77.97	77.0933	74.2	2908	3196	2652	2869	3078.57	3110	3019.19	2918.67	0.0104336	0.894697	0.999443
113220	'KIF12'	mRNA	0	0.28	0	0	0.06	0.06	0.04	0.0933333	0	0.21	0	0	0.04	0.04	0.0266667	0.07	0	5	0	0	1	1	0.666667	1.66667	-1.33834	0.503857	0.999443
113230	'MISP3'	mRNA	10.86	10.82	8.37	8.81	8.92	8.79	8.84	10.0167	7.87	8.04	6.15	6.24	6.52	6.42	6.39333	7.35333	151	160	115	125	128	127	126.667	142	-0.203608	0.252137	0.999443
113235	'SLC46A1'	mRNA	7.4	7.29	7.43	8.14	7.8	7.44	7.79333	7.37333	5.36	5.42	5.45	5.76	5.7	5.44	5.63333	5.41	507	533	506	570	553	530	551	515.333	0.0558503	0.562509	0.999443
113246	'C12orf57'	mRNA	562.75	551.65	517.13	473.24	551.83	514.65	513.24	543.843	408.04	410.14	379.68	335.16	402.96	376.22	371.447	399.287	1912	1977	1686	1638	1933	1825	1798.67	1858.33	-0.0848596	0.335943	0.999443
11325	'DDX42'	mRNA	61.41	59.31	57.41	69.5	60.34	62.99	64.2767	59.3767	44.52	44.1	42.15	49.22	44.06	46.05	46.4433	43.59	2487	2557	2307	2873	2529	2645	2682.33	2450.33	0.0895073	0.196753	0.999443
113251	'LARP4'	mRNA	21.9	20.46	25.84	26.28	23.48	22.76	24.1733	22.7333	15.88	15.21	18.97	18.61	17.15	16.64	17.4667	16.6867	1014	936	1232	1225	1064	1042	1110.33	1060.67	0.0221368	0.832771	0.999443
113263	'GLCCI1'	mRNA	22.98	19.67	22.83	24.46	23.83	23.59	23.96	21.8267	16.66	14.63	16.76	17.32	17.4	17.24	17.32	16.0167	1137	1036	1122	1235	1216	1211	1220.67	1098.33	0.11142	0.16374	0.999443
113277	'TMEM106A'	mRNA	0.48	0.42	0.21	0.43	0.31	0.44	0.393333	0.37	0.35	0.31	0.16	0.3	0.22	0.32	0.28	0.273333	16	15	7	14	10	15	13	12.6667	-0.00102371	0.998483	0.999549
113278	'SLC52A3'	mRNA	0.94	0.8	0.83	1.07	0.95	0.71	0.91	0.856667	0.68	0.59	0.61	0.76	0.69	0.52	0.656667	0.626667	26	22	22	30	26	19	25	23.3333	0.0568038	0.883106	0.999443
11328	'FKBP9'	mRNA	41.19	38.93	39.65	43.61	38.53	39.16	40.4333	39.9233	29.87	28.94	29.11	30.88	28.14	28.63	29.2167	29.3067	1438	1441	1372	1559	1391	1424	1458	1417	-8.27e-05	0.999104	0.999579
11329	'STK38'	mRNA	31.38	29.55	30.17	35.45	30.48	31.52	32.4833	30.3667	22.76	21.97	22.15	25.11	22.26	23.04	23.47	22.2933	1126	1125	1092	1302	1128	1148	1192.67	1114.33	0.0563138	0.477914	0.999443
1133	'CHRM5'	mRNA	0	0.02	0	0	0.02	0	0.00666667	0.00666667	0	0.01	0	0	0.01	0	0.00333333	0.00333333	0	1	0	0	1	0	0.333333	0.333333	-0.0405185	0.990097	0.999443
11330	'CTRC'	mRNA	0.06	0	0.03	0.14	0.03	0.03	0.0666667	0.03	0.04	0	0.02	0.1	0.02	0.02	0.0466667	0.02	2	0	1	5	1	1	2.33333	1	1.16379	0.455444	0.999443
11331	'PHB2'	mRNA	659.09	705.17	661.7	673.52	691.1	669.95	678.19	675.32	477.89	524.28	485.82	477	504.66	489.74	490.467	495.997	8101	9217	8020	8440	8760	8560	8586.67	8446	-0.0153767	0.821109	0.999443
11332	'ACOT7'	mRNA	94.34	107.16	96.25	103.19	97.78	100.08	100.35	99.25	68.4	79.67	70.67	73.08	71.4	73.16	72.5467	72.9133	1514	1783	1475	1623	1591	1598	1604	1590.67	-0.0275283	0.735466	0.999443
11333	'PDAP1'	mRNA	90.37	89.71	80.8	87.3	93.26	90.97	90.51	86.96	65.52	66.7	59.33	61.82	68.1	66.5	65.4733	63.85	2337	2468	2071	2303	2487	2442	2410.67	2292	0.0343346	0.663576	0.999443
11334	'TUSC2'	mRNA	34.48	36.08	36.18	32.38	35.36	34.92	34.22	35.58	25	26.83	26.56	22.93	25.82	25.52	24.7567	26.13	541	602	561	518	572	569	553	568	-0.0778081	0.442149	0.999443
11335	'CBX3'	mRNA	143.49	118.12	143.12	148.52	134.69	134.68	139.297	134.91	104.04	87.82	105.08	105.18	98.35	98.45	100.66	98.98	2908	2554	2879	3067	2825	2850	2914	2780.33	0.0258286	0.727752	0.999443
11336	'EXOC3'	mRNA	47.68	50.02	42.34	56.21	49.56	50.58	52.1167	46.68	34.57	37.19	31.09	39.81	36.19	36.97	37.6567	34.2833	1337	1492	1177	1608	1433	1472	1504.33	1335.33	0.1317	0.129118	0.999443
11337	'GABARAP'	mRNA	271.83	229.74	304.15	271.67	261.31	235.64	256.207	268.573	197.1	170.81	223.31	192.4	190.81	172.25	185.153	197.073	3168	2846	3495	3227	3140	2854	3073.67	3169.67	-0.086898	0.305226	0.999443
11338	'U2AF2'	mRNA	116.95	121.47	115.95	136.19	130.14	116.93	127.753	118.123	84.8	90.31	85.13	96.45	95.03	85.47	92.3167	86.7467	2518	2774	2485	2996	2886	2624	2835.33	2592.33	0.0885087	0.218761	0.999443
11339	'OIP5'	mRNA	37.8	29.11	30.81	34.46	30.31	31.78	32.1833	32.5733	27.41	21.65	22.62	24.4	22.14	23.23	23.2567	23.8933	389	319	313	362	322	340	341.333	340.333	-0.0367518	0.764897	0.999443
11340	'EXOSC8'	mRNA	69.24	57.75	62.4	62.06	60.93	67.3	63.43	63.13	50.2	42.94	45.81	43.96	44.49	49.19	45.88	46.3167	692	614	614	633	629	701	654.333	640	-0.00782467	0.936883	0.999443
113402	'SFT2D1'	mRNA	41.1	35.03	37.15	38.84	40.2	31.36	36.8	37.76	29.8	26.04	27.28	27.51	29.36	22.92	26.5967	27.7067	349	316	310	336	352	277	321.667	325	-0.0556947	0.659475	0.999443
11341	'SCRG1'	mRNA	0.02	0.02	0.02	0.05	0	0.02	0.0233333	0.02	0.02	0.02	0.02	0.03	0	0.02	0.0166667	0.02	1.01	1	1	2	0	1	1	1.00333	-0.0524056	0.97746	0.999443
113419	'TEX261'	mRNA	27.6	25.5	31.26	31.48	28.46	25.22	28.3867	28.12	20.01	18.96	22.95	22.3	20.78	18.44	20.5067	20.64	946	930	1063	1101	1006	897	1001.33	979.667	-0.0112843	0.904583	0.999443
11342	'RNF13'	mRNA	16.75	12.7	16.13	16.09	15.36	15.92	15.79	15.1933	12.14	9.45	11.84	11.39	11.21	11.64	11.4133	11.1433	400	323	379	389	374	393	385.333	367.333	0.0278613	0.814016	0.999443
11343	'MGLL'	mRNA	76.95	72.18	75.91	80.84	80.07	79.11	80.0067	75.0133	55.79	53.67	55.73	57.25	58.47	57.83	57.85	55.0633	3498	3479	3410	3769	3690	3715	3724.67	3462.33	0.0649249	0.284705	0.999443
11344	'TWF2'	mRNA	124.23	137.27	116.85	121.19	122.17	134.83	126.063	126.117	90.08	102.05	85.79	85.83	89.21	98.56	91.2	92.64	1853	2177	1722	1843	1879	2089	1937	1917.33	-0.0234343	0.79567	0.999443
113444	'SMIM12'	mRNA	14.86	13.31	14.6	15.82	14.41	14.89	15.04	14.2567	10.77	9.9	10.72	11.2	10.52	10.89	10.87	10.4633	623	587	643	666	618	643	642.333	617.667	0.0150885	0.872383	0.999443
11345	'GABARAPL2'	mRNA	124.49	117.32	120.34	121.73	125.58	119.78	122.363	120.717	90.26	87.23	88.35	86.21	91.7	87.56	88.49	88.6133	976	977	926	972	1015	977	988	959.667	0.00213347	0.979107	0.999443
113451	'AZIN2'	mRNA	0.22	0.18	0.3	0.1	0.18	0.18	0.153333	0.233333	0.16	0.13	0.22	0.07	0.13	0.13	0.11	0.17	4	5	5	1	4	4	3	4.66667	-0.670968	0.487055	0.999443
113452	'TMEM54'	mRNA	18.15	18.19	14.71	14.67	15.84	18.48	16.33	17.0167	13.16	13.52	10.8	10.39	11.56	13.51	11.82	12.4933	154	163	122	126	138	161	141.667	146.333	-0.0843417	0.634958	0.999443
113455421	'DERPC'	mRNA	23.69	30.14	28.3	28.76	23.75	22.65	25.0533	27.3767	17.18	22.41	20.77	20.37	17.34	16.56	18.09	20.12	456.72	693.93	605.65	720.76	505.29	496.08	574.043	585.433	-0.0717971	0.619386	0.999443
113457	'TUBA3D'	mRNA	0	0.07	0	0	0	0	0	0.0233333	0	0.05	0	0	0	0	0	0.0166667	0	1	0	0	0	0	0	0.333333	-1.0023	0.805965	0.999443
11346	'SYNPO'	mRNA	41.52	41.63	45.96	46.46	44.66	46.14	45.7533	43.0367	30.1	30.95	33.75	32.9	32.61	33.73	33.08	31.6	2325	2490	2553	2664	2583	2673	2640	2456	0.0634313	0.363561	0.999443
113510	'HELQ'	mRNA	2.89	2.35	2.82	2.72	3.07	2.27	2.68667	2.68667	2.09	1.75	2.07	1.93	2.24	1.66	1.94333	1.97	95	77	92	92	106	77	91.6667	88	0.0178236	0.933495	0.999443
113523638	'SMIM41'	mRNA	0.62	0.58	0.87	0.38	0.53	0.6	0.503333	0.69	0.45	0.43	0.64	0.27	0.38	0.44	0.363333	0.506667	8	8	11	5	7	8	6.66667	9	-0.472256	0.479711	0.999443
113540	'CMTM1'	mRNA	5.04	5.18	5.01	4.51	4.56	5.4	4.82333	5.07667	3.66	3.85	3.68	3.2	3.33	3.95	3.49333	3.73	44	48	43	40.92	41	49	43.64	45	-0.0935934	0.743206	0.999443
113612	'CYP2U1'	mRNA	0.42	0.32	0.31	0.33	0.29	0.38	0.333333	0.35	0.31	0.24	0.23	0.24	0.21	0.28	0.243333	0.26	21	17	15	17	15	19	17	17.6667	-0.0952828	0.832302	0.999443
113622	'ADPRHL1'	mRNA	5.74	4.87	5.69	5.74	5.92	6.6	6.08667	5.43333	4.16	3.62	4.18	4.06	4.33	4.82	4.40333	3.98667	103	93	101	105	110	123	112.667	99	0.146702	0.443747	0.999443
113655	'MFSD3'	mRNA	47.16	50.55	45.17	42.71	44.71	46.32	44.58	47.6267	34.19	37.58	33.17	30.25	32.65	33.86	32.2533	34.98	696	788	664	658	679	719	685.333	716	-0.102103	0.291356	0.999443
113675	'SDSL'	mRNA	9.88	8.77	5.69	7	5.73	7.24	6.65667	8.11333	7.16	6.52	4.18	4.95	4.18	5.29	4.80667	5.95333	116	108	66	83	68	89	80	96.6667	-0.311598	0.180604	0.999443
1137	'CHRNA4'	mRNA	0.12	0.15	0.09	0.02	0.22	0.2	0.146667	0.12	0.08	0.11	0.07	0.02	0.16	0.14	0.106667	0.0866667	6	7	4	1	11	9	7	5.66667	0.278402	0.731075	0.999443
113730	'KLHDC7B'	mRNA	0.13	0.24	0.13	0.2	0.31	0.27	0.26	0.166667	0.09	0.18	0.1	0.14	0.22	0.2	0.186667	0.123333	7	14	7	11	17	15	14.3333	9.33333	0.58405	0.300254	0.999443
113763	'ZBED6CL'	mRNA	5.79	6.13	6.16	7.48	6.32	6.78	6.86	6.02667	4.2	4.56	4.52	5.3	4.62	4.96	4.96	4.42667	167	188	176	220	188	203	203.667	177	0.16114	0.272408	0.999443
113791	'PIK3IP1'	mRNA	0.46	0.6	0.25	0.45	0.82	0.57	0.613333	0.436667	0.33	0.45	0.19	0.32	0.6	0.42	0.446667	0.323333	11	15	6	11	20	14	15	10.6667	0.458364	0.403726	0.999443
1138	'CHRNA5'	mRNA	4.42	3.43	3.64	3.99	4.09	3.57	3.88333	3.83	3.2	2.55	2.67	2.82	2.99	2.61	2.80667	2.80667	163	133	134	151	156	136	147.667	143.333	0.00242045	0.988556	0.999443
113802	'HENMT1'	mRNA	41.51	31.99	37.15	42.97	36.83	35.5	38.4333	36.8833	30.1	23.78	27.28	30.43	26.89	25.95	27.7567	27.0533	643	528	571	683	590	571	614.667	580.667	0.0397608	0.70605	0.999443
113828	'FAM83F'	mRNA	0.02	0.03	0.01	0.01	0.03	0.02	0.02	0.02	0.02	0.02	0	0.01	0.03	0.01	0.0166667	0.0133333	4	6	1	2	6	3	3.66667	3.66667	-0.028911	0.977169	0.999443
113829	'SLC35A4'	mRNA	72.95	68.92	77.81	75.63	72.91	68.53	72.3567	73.2267	52.9	51.24	57.13	53.56	53.24	50.09	52.2967	53.7567	2152	2163	2276	2276	2218	2098	2197.33	2197	-0.0411016	0.556584	0.999443
113878	'DTX2'	mRNA	28.3	28.58	28.64	29.46	27.13	27.05	27.88	28.5067	20.52	21.25	21.03	20.86	19.81	19.78	20.15	20.9333	581	664	623	627	601	586	604.667	622.667	-0.0830743	0.382011	0.999443
1139	'CHRNA7'	mRNA	0	0.03	0	0	0	0.02	0.00666667	0.01	0	0.02	0	0	0	0.01	0.00333333	0.00666667	0	2	0	0	0	1.17	0.39	0.666667	-0.923748	0.743894	0.999443
1140	'CHRNB1'	mRNA	5.83	5.3	4.98	4.91	4.93	5.15	4.99667	5.37	4.23	3.94	3.66	3.47	3.6	3.77	3.61333	3.94333	147.99	143	125.24	127	129	135.66	130.553	138.743	-0.125437	0.462136	0.999443
114034	'TOE1'	mRNA	28.91	26.48	25.38	32.2	28.51	26.28	28.9967	26.9233	20.96	19.69	18.64	22.81	20.82	19.21	20.9467	19.7633	523	511	458	595	530	493	539.333	497.333	0.075624	0.466397	0.999443
114049	'BUD23'	mRNA	147.32	128.57	138.74	140.4	141.7	142.45	141.517	138.21	106.82	95.59	101.86	99.43	103.47	104.14	102.347	101.423	1520	1413	1413	1479	1514	1532	1508.33	1448.67	0.0182549	0.809508	0.999443
114088	'TRIM9'	mRNA	0	0	0.04	0.02	0.04	0.04	0.0333333	0.0133333	0	0	0.03	0.02	0.03	0.03	0.0266667	0.01	0	0	2	1	2	2	1.66667	0.666667	1.27637	0.489309	0.999443
1141	'CHRNB2'	mRNA	0.03	0.07	0.01	0.04	0.06	0.04	0.0466667	0.0366667	0.02	0.06	0.01	0.02	0.04	0.03	0.03	0.03	3	8.83	1	4.03	7	4.31	5.11333	4.27667	0.2909	0.753665	0.999443
114108587	'ATF7-NPFF'	mRNA	4.42	3.25	4.09	2.22	4.49	4.42	3.71	3.92	3.2	2.41	3	1.57	3.28	3.23	2.69333	2.87	69.42	54.29	63.49	35.55	72.79	72.24	60.1933	62.4	-0.0904406	0.751224	0.999443
114112	'TXNRD3'	mRNA	3.89	2.76	2.98	3.77	3.34	3.45	3.52	3.21	2.82	2.05	2.19	2.67	2.44	2.52	2.54333	2.35333	113	86	85	112	100	104	105.333	94.6667	0.113079	0.572431	0.999443
114118903	'ARHGAP11A-SCG5'	mRNA	0.36	0.09	0.2	0	0	0.1	0.0333333	0.216667	0.26	0.07	0.15	0	0	0.07	0.0233333	0.16	11.45	3.15	6.32	0	0	3.16	1.05333	6.97333	-2.77224	0.0237786	0.999443
114134	'SLC2A13'	mRNA	12.46	9.67	11.07	12.46	13.57	12.72	12.9167	11.0667	9.04	7.19	8.13	8.82	9.91	9.3	9.34333	8.12	577	458	610	554	553	528	545	548.333	-0.050836	0.659668	0.999443
114294	'LACTB'	mRNA	13.44	10.63	11.95	12.97	12.47	11.56	12.3333	12.0067	9.75	7.9	8.77	9.18	9.1	8.45	8.91	8.80667	266	220	233	258	247	230	245	239.667	-0.00947589	0.944381	0.999443
1143	'CHRNB4'	mRNA	0.03	0.09	0.08	0.07	0	0	0.0233333	0.0666667	0.02	0.06	0.06	0.05	0	0	0.0166667	0.0466667	1	3	2	1	0	0	0.333333	2	-2.51988	0.185255	0.999443
114327	'EFHC1'	mRNA	9.63	8.56	9.95	10.63	9.42	9.92	9.99	9.38	6.98	6.36	7.31	7.53	6.88	7.25	7.22	6.88333	701	663	720	790	707	749	748.667	694.667	0.066345	0.464675	0.999443
114336	'CGB2'	mRNA	0.23	0.5	0.29	0.69	0.27	0.88	0.613333	0.34	0.16	0.37	0.21	0.49	0.2	0.64	0.443333	0.246667	1	2.5	1.25	3.09	1.23	4.03	2.78333	1.58333	0.959955	0.476893	0.999443
1144	'CHRND'	mRNA	0.14	0.25	0.24	0.27	0.4	0.26	0.31	0.21	0.1	0.19	0.17	0.19	0.29	0.19	0.223333	0.153333	4	8	7	8	12	8	9.33333	6.33333	0.52099	0.442015	0.999443
114483834	'ABCF2-H2BE1'	mRNA	42.35	39.43	43.39	43.9	37.59	35.27	38.92	41.7233	30.71	29.31	31.86	31.09	27.45	25.78	28.1067	30.6267	917.24	908.33	930.78	969.87	839.6	793.1	867.523	918.783	-0.125367	0.158001	0.999443
1145	'CHRNE'	mRNA	0.05	0.04	0	0	0.05	0.09	0.0466667	0.03	0.03	0.03	0	0	0.03	0.07	0.0333333	0.02	1	1	0	0	1	2	1	0.666667	0.563569	0.78821	0.999443
114548	'NLRP3'	mRNA	0	0	0	0	0	0.03	0.01	0	0	0	0	0	0	0.02	0.00666667	0	0	0	0	0	0	1	0.333333	0	0.92125	0.82138	0.999443
114569	'MAL2'	mRNA	2.33	1.65	2.6	1.83	1.88	1.88	1.86333	2.19333	1.69	1.23	1.91	1.3	1.38	1.37	1.35	1.61	66	49	73	53	55	54	54	62.6667	-0.256565	0.321407	0.999443
114609	'TIRAP'	mRNA	7.84	9.17	9.52	9.2	11.01	8.36	9.52333	8.84333	5.69	6.82	6.99	6.51	8.04	6.11	6.88667	6.5	117	128	128	137	156	127	140	124.333	0.130994	0.45369	0.999443
114625	'ERMAP'	mRNA	2.71	2.97	2.87	3.54	3.37	3.44	3.45	2.85	1.97	2.21	2.11	2.51	2.46	2.51	2.49333	2.09667	96	111	102	127	122	125	124.667	103	0.234995	0.197987	0.999443
114659	'LRRC37B'	mRNA	3.59	4.08	3.51	5.16	3.91	4.44	4.50333	3.72667	2.6	3.03	2.58	3.66	2.86	3.25	3.25667	2.73667	131	155	122	186	153	162	167	136	0.255224	0.125308	0.999443
1147	'CHUK'	mRNA	9.81	7.76	9.21	9.71	8.61	8.5	8.94	8.92667	7.12	5.77	6.76	6.87	6.28	6.22	6.45667	6.55	363	304	335	364	328	325	339	334	-0.0203308	0.865596	0.999443
114757	'CYGB'	mRNA	2.62	2.18	2.35	2.15	2.08	2.06	2.09667	2.38333	1.9	1.62	1.73	1.52	1.52	1.51	1.51667	1.75	50	44	44	42	41	41	41.3333	46	-0.194875	0.493837	0.999443
114769	'CARD16'	mRNA	250.84	256.82	247.92	280.71	272.83	292.43	281.99	251.86	181.88	190.94	182.02	198.81	199.23	213.77	203.937	184.947	1314.69	1430.7	1281.8	1516.48	1479.4	1610.72	1535.53	1342.4	0.154592	0.0484643	0.999443
114780	'PKD1L2'	mRNA	0.92	1.37	0.83	1.67	1.19	1.07	1.31	1.04	0.67	1.02	0.61	1.18	0.87	0.78	0.943333	0.766667	16	26	17	31	24	23	26	19.6667	0.361358	0.369847	0.999443
114781	'BTBD9'	mRNA	0.91	0.97	1.14	1.03	0.9	1.14	1.02333	1.00667	0.66	0.72	0.84	0.73	0.66	0.84	0.743333	0.74	82	93	103	92	84	100	92	92.6667	-0.0515306	0.802376	0.999443
114783	'LMTK3'	mRNA	3.96	4.19	3.37	4.18	4.14	4.85	4.39	3.84	2.87	3.11	2.47	2.96	3.02	3.55	3.17667	2.81667	209	236	175	226	222	264	237.333	206.667	0.16124	0.280356	0.999443
114784	'CSMD2'	mRNA	0	0	0.01	0	0	0	0	0.00333333	0	0	0.01	0	0	0	0	0.00333333	0	0	1	0	0	0	0	0.333333	-1.0023	0.805965	0.999443
114785	'MBD6'	mRNA	20.31	23.13	22.93	24.43	26.53	22.98	24.6467	22.1233	14.73	17.2	16.84	17.3	19.37	16.8	17.8233	16.2567	873	1053	983	1071	1184	1029	1094.67	969.667	0.135146	0.151358	0.999443
114786	'XKR4'	mRNA	0.01	0.01	0.02	0.02	0.01	0.01	0.0133333	0.0133333	0.01	0.01	0.02	0.01	0.01	0.01	0.01	0.0133333	2.88	3	5	4	3.02	1.91	2.97667	3.62667	-0.371138	0.73307	0.999443
114787	'GPRIN1'	mRNA	7.57	8.44	7.37	8.96	7.91	8.63	8.5	7.79333	5.49	6.27	5.41	6.34	5.78	6.31	6.14333	5.72333	332	394	321	401	358	393	384	349	0.097707	0.407131	0.999443
114788	'CSMD3'	mRNA	0.01	0	0	0.01	0	0	0.00333333	0.00333333	0.01	0	0	0.01	0	0	0.00333333	0.00333333	2	0	0	1	0	0	0.333333	0.666667	-0.933118	0.741968	0.999443
114789	'SLC25A25'	mRNA	11.34	11.84	11.56	12.04	11.94	12.18	12.0533	11.58	8.22	8.81	8.49	8.53	8.72	8.9	8.71667	8.50667	396	440	398	424	427	438	429.667	411.333	0.0230764	0.829386	0.999443
114790	'STK11IP'	mRNA	8.91	8.72	7.65	9.24	10.08	9.23	9.51667	8.42667	6.46	6.48	5.62	6.54	7.36	6.75	6.88333	6.18667	325	344	280	329	372	350	350.333	316.333	0.108756	0.378361	0.999443
114791	'TUBGCP5'	mRNA	12.41	9.53	11.07	12.04	9.89	10.65	10.86	11.0033	9	7.08	8.13	8.53	7.22	7.79	7.84667	8.07	471	389	419	470	391	422	427.667	426.333	-0.0375648	0.742739	0.999443
114792	'KLHL32'	mRNA	0.04	0.01	0.1	0.01	0.07	0	0.0266667	0.05	0.03	0.01	0.07	0.01	0.05	0	0.02	0.0366667	1.86	1	3	1.22	4.05	0	1.75667	1.95333	-0.0407198	0.978479	0.999443
114793	'FMNL2'	mRNA	13.96	11.32	13.48	14.16	12.72	12.62	13.1667	12.92	10.12	8.42	9.9	10.03	9.29	9.23	9.51667	9.48	838	718	796	856	780	776	804	784	-0.00547269	0.952719	0.999443
114794	'ELFN2'	mRNA	3.05	3.2	3.23	3.35	3.04	2.69	3.02667	3.16	2.21	2.38	2.37	2.37	2.22	1.97	2.18667	2.32	273	305	288	306	281	250	279	288.667	-0.0907074	0.474999	0.999443
114795	'TMEM132B'	mRNA	0	0.02	0.02	0	0.01	0.03	0.0133333	0.0133333	0	0.01	0.01	0	0.01	0.02	0.01	0.00666667	0	2	2	0	1	4	1.66667	1.33333	0.293142	0.857734	0.999443
114799	'ESCO1'	mRNA	6.58	5.87	6.87	6.34	5.63	6.45	6.14	6.44	4.77	4.36	5.04	4.49	4.11	4.72	4.44	4.72333	307	292	318	303	272	313	296	305.667	-0.0875353	0.478135	0.999443
114800	'CCDC85A'	mRNA	0.03	0	0.03	0	0	0	0	0.02	0.02	0	0.02	0	0	0	0	0.0133333	1	0	1	0	0	0	0	0.666667	-1.90516	0.550665	0.999443
114803	'MYSM1'	mRNA	1.05	1.06	1.41	1.33	0.86	1.11	1.1	1.17333	0.76	0.79	1.03	0.94	0.63	0.81	0.793333	0.86	88	95	118	113	74	96	94.3333	100.333	-0.133361	0.533587	0.999443
114804	'RNF157'	mRNA	1.31	1.18	0.95	1.17	1.2	1.6	1.32333	1.14667	0.95	0.88	0.7	0.83	0.87	1.17	0.956667	0.843333	66.84	53.11	50.11	63	65.25	71	66.4167	56.6867	0.196382	0.428129	0.999443
114805	'GALNT13'	mRNA	0.86	0.92	0.61	1.02	0.7	0.89	0.87	0.796667	0.62	0.69	0.45	0.72	0.51	0.65	0.626667	0.586667	38	34	36	37	43	39	39.6667	36	0.100163	0.743794	0.999443
114815	'SORCS1'	mRNA	0.07	0.04	0	0.03	0.07	0.04	0.0466667	0.0366667	0.05	0.03	0	0.02	0.05	0.03	0.0333333	0.0266667	2	3	0	2	2	1	1.66667	1.66667	-0.035238	0.980902	0.999443
114818	'KLHL29'	mRNA	2.96	3.18	2.94	3.64	2.91	2.97	3.17333	3.02667	2.14	2.36	2.16	2.58	2.12	2.17	2.29	2.22	157	187	149	195	157	162	171.333	164.333	0.018825	0.906728	0.999443
114821	'ZBED9'	mRNA	0.08	0.08	0.07	0.13	0.15	0.08	0.12	0.0766667	0.06	0.06	0.05	0.09	0.11	0.06	0.0866667	0.0566667	5	5	4	8	10	5	7.66667	4.66667	0.676144	0.374424	0.999443
114822	'RHPN1'	mRNA	10.03	11.92	8.35	9.13	9.24	10.73	9.7	10.1	7.27	8.86	6.13	6.47	6.75	7.85	7.02333	7.42	387	491	322	363	369	433	388.333	400	-0.0798542	0.566941	0.999443
114823	'LENG8'	mRNA	27.8	33.26	28.65	30.65	26.93	32.33	29.97	29.9033	20.16	24.73	21.03	21.71	19.67	23.63	21.67	21.9733	1416	1734	1396	1512	1338	1669	1506.33	1515.33	-0.0478771	0.626087	0.999443
114825	'PWWP2A'	mRNA	9.33	7.78	8.23	10.7	9.2	8.71	9.53667	8.44667	6.76	5.79	6.04	7.58	6.72	6.36	6.88667	6.19667	354.09	305	315	398	348	342.19	362.73	324.697	0.117868	0.322127	0.999443
114826	'SMYD4'	mRNA	10.43	9.25	9.33	11	9.27	9.67	9.98	9.67	7.56	6.88	6.85	7.79	6.77	7.07	7.21	7.09667	448.04	423	396.09	479.01	433	442.89	451.633	422.377	0.0549029	0.602953	0.999443
114827	'FHAD1'	mRNA	0.37	0.58	0.32	0.37	0.25	0.3	0.306667	0.423333	0.27	0.43	0.23	0.26	0.18	0.22	0.22	0.31	19	28	15	16	13	13	14	20.6667	-0.601372	0.193916	0.999443
114841035	'LOC114841035'	mRNA	2.76	3.12	2.59	2.1	1.82	1.9	1.94	2.82333	2	2.32	1.9	1.49	1.33	1.39	1.40333	2.07333	42.41	50.91	39.4	32.96	28.84	30.34	30.7133	44.24	-0.581801	0.0633065	0.999443
114876	'OSBPL1A'	mRNA	22.23	18.42	23.41	22.85	20.69	19.62	21.0533	21.3533	16.12	13.69	17.19	16.18	15.1	14.34	15.2067	15.6667	793	707	795	816	753	734	767.667	765	-0.0368903	0.688095	0.999443
114879	'OSBPL5'	mRNA	18.45	21.68	18.38	19.54	19.69	19.77	19.6667	19.5033	13.38	16.12	13.5	13.84	14.38	14.46	14.2267	14.3333	727	907	720	785	796	811	797.333	784.667	-0.0158917	0.873222	0.999443
114880	'OSBPL6'	mRNA	0.32	0.28	0.31	0.41	0.25	0.35	0.336667	0.303333	0.23	0.21	0.23	0.29	0.18	0.26	0.243333	0.223333	24	22	22	31	19	26	25.3333	22.6667	0.117272	0.762342	0.999443
114881	'OSBPL7'	mRNA	8.42	9.27	7.42	8.88	9.56	8	8.81333	8.37	6.11	6.89	5.45	6.29	6.98	5.85	6.37333	6.15	304	362	270	332	364	313	336.333	312	0.0695415	0.593736	0.999443
114882	'OSBPL8'	mRNA	5.48	4.36	5.91	5.3	5.07	4.54	4.97	5.25	3.97	3.24	4.34	3.75	3.71	3.32	3.59333	3.85	419	355	449	414	401	360	391.667	407.667	-0.100134	0.406423	0.999443
114883	'OSBPL9'	mRNA	38.76	36.72	40.41	42.35	39.65	37.35	39.7833	38.63	28.11	27.3	29.67	29.99	28.95	27.3	28.7467	28.36	1116	1125	1147	1254	1187	1121	1187.33	1129.33	0.0308442	0.692772	0.999443
114884	'OSBPL10'	mRNA	14.62	15.31	13.84	15.17	13.92	14.46	14.5167	14.59	10.6	11.38	10.16	10.74	10.17	10.57	10.4933	10.7133	507	540	506	562	509	534	535	517.667	0.00663287	0.945762	0.999443
114885	'OSBPL11'	mRNA	9.12	7.12	8.85	9.82	7.89	7.95	8.55333	8.36333	6.61	5.29	6.5	6.95	5.76	5.81	6.17333	6.13333	437	363	421	480	390	395	421.667	407	0.00798129	0.946425	0.999443
114897	'C1QTNF1'	mRNA	4.56	4.89	4.64	5.35	4.8	3.92	4.69	4.69667	3.31	3.64	3.41	3.79	3.5	2.87	3.38667	3.45333	132	150	131	159	144	116	139.667	137.667	-0.0209073	0.904691	0.999443
114898	'C1QTNF2'	mRNA	0.13	0.16	0.11	0.04	0.13	0.12	0.0966667	0.133333	0.1	0.12	0.08	0.03	0.09	0.09	0.07	0.1	2	4	3	1	1	2	1.33333	3	-1.20728	0.349974	0.999443
114899	'C1QTNF3'	mRNA	0.25	0.31	0.22	0.22	0.19	0.16	0.19	0.26	0.18	0.23	0.16	0.15	0.14	0.12	0.136667	0.19	9	12	8	8	7	6	7	9.66667	-0.506096	0.433581	0.999443
114900	'C1QTNF4'	mRNA	0	0.08	0.09	0	0.16	0	0.0533333	0.0566667	0	0.06	0.06	0	0.11	0	0.0366667	0.04	0	2	2	0	4	0	1.33333	1.33333	-0.0281307	0.987576	0.999443
114904	'C1QTNF6'	mRNA	96.22	93.26	93.29	115.63	106.02	98.19	106.613	94.2567	69.77	69.34	68.49	81.89	77.42	71.78	77.03	69.2	2752	2793	2662	3391	3100	2877	3122.67	2735.67	0.149295	0.0312215	0.999443
114907	'FBXO32'	mRNA	0.15	0.1	0.07	0.08	0.09	0.1	0.09	0.106667	0.11	0.07	0.05	0.06	0.07	0.07	0.0666667	0.0766667	11	7	5	6	7	7	6.66667	7.66667	-0.239265	0.732953	0.999443
114908	'TMEM123'	mRNA	95	75.27	99.33	92.26	87.04	83.8	87.7	89.8667	68.88	55.96	72.93	65.34	63.56	61.26	63.3867	65.9233	3192	2691	3311	3163	3016	2922	3033.67	3064.67	-0.056961	0.496332	0.999443
114926	'SMIM19'	mRNA	7.15	6.22	6.65	8.15	7.96	6.87	7.66	6.67333	5.19	4.62	4.88	5.77	5.81	5.02	5.53333	4.89667	251	232	228	292	289	251	277.333	237	0.185754	0.156089	0.999443
114928	'GPRASP2'	mRNA	0.15	0.24	0.19	0.54	0	0.55	0.363333	0.193333	0.11	0.18	0.14	0.38	0	0.4	0.26	0.143333	5.18	9	6.53	19.24	0	19.98	13.0733	6.90333	0.879056	0.258806	0.999443
114932	'MRFAP1L1'	mRNA	48.09	43.41	44.99	46.89	47.04	46.49	46.8067	45.4967	34.87	32.28	33.03	33.21	34.35	33.98	33.8467	33.3933	698	670	645	694	704	701	699.667	671	0.020309	0.821097	0.999443
114960	'TSGA13'	mRNA	0	0.05	0.05	0.05	0.1	0.08	0.0766667	0.0333333	0	0.04	0.04	0.03	0.07	0.06	0.0533333	0.0266667	0	1	1	0.93	1.95	1.61	1.49667	0.666667	-0.0299382	0.98956	0.999443
114971	'PTPMT1'	mRNA	111	109.6	104.98	109.87	114.84	104.45	109.72	108.527	80.48	81.48	77.08	77.81	83.86	76.36	79.3433	79.68	2717	2854	2545	2745	2897	2653.47	2765.16	2705.33	-0.00806413	0.909571	0.999443
114984	'FLYWCH2'	mRNA	283.33	334.2	278.77	292.19	308.67	313.63	304.83	298.767	205.43	248.47	204.67	206.94	225.4	229.26	220.533	219.523	2302	2886	2223	2421	2578	2652	2550.33	2470.33	0.00805775	0.930152	0.999443
114987	'WDR31'	mRNA	1.24	1.1	1.21	1.61	1.56	1.01	1.39333	1.18333	0.9	0.82	0.89	1.14	1.14	0.74	1.00667	0.87	52	50.51	50	70	69	45	61.3333	50.8367	0.23342	0.379167	0.999443
114990	'VASN'	mRNA	66.16	70.89	62.9	69.54	75.4	75.22	73.3867	66.65	47.97	52.7	46.18	49.25	55.06	54.99	53.1	48.95	1866	2127	1759	2001	2193	2202	2132	1917.33	0.114922	0.17289	0.999443
114991	'ZNF618'	mRNA	2.21	1.88	2.06	2.36	2.18	2.29	2.27667	2.05	1.6	1.4	1.51	1.67	1.6	1.67	1.64667	1.50333	220	199	203	240	227	237	234.667	207.333	0.137917	0.312584	0.999443
115	'ADCY9'	mRNA	10.73	11.31	11	12.43	11.29	11.26	11.66	11.0133	7.78	8.41	8.07	8.8	8.24	8.23	8.42333	8.08667	895	1006	904	1051	973	959	994.333	935	0.0479539	0.566268	0.999443
115004	'CGAS'	mRNA	7.49	5.88	6.99	8.09	6.87	7.27	7.41	6.78667	5.43	4.37	5.13	5.73	5.02	5.32	5.35667	4.97667	243	203	225	268.02	230	245	247.673	223.667	0.105167	0.444406	0.999443
115019	'SLC26A9'	mRNA	0	0	0	0	0.02	0	0.00666667	0	0	0	0	0	0.02	0	0.00666667	0	0	0	0	0	1	0	0.333333	0	0.92125	0.82138	0.999443
115024	'NT5C3B'	mRNA	48.35	50.66	46.11	52.1	46.6	49.68	49.46	48.3733	35.06	37.67	33.86	36.9	34.03	36.31	35.7467	35.53	590	647	550	647	587	622	618.667	595.667	0.0143349	0.881962	0.999443
115098	'CCDC124'	mRNA	233.16	262.6	226.15	227.4	232.09	240.9	233.463	240.637	169.06	195.24	166.04	161.05	169.48	176.1	168.877	176.78	1867	2233	1778	1856	1916	2006	1926	1959.33	-0.0631939	0.468137	0.999443
115106	'HAUS1'	mRNA	41.13	41.03	40.58	47.41	44.89	46.87	46.39	40.9133	29.82	30.5	29.79	33.58	32.78	34.27	33.5433	30.0367	367	389	356	431	413	435	426.333	370.667	0.161654	0.133721	0.999443
115123	'MARCHF3'	mRNA	0	0.09	0	0.02	0.02	0.18	0.0733333	0.03	0	0.06	0	0.02	0.02	0.13	0.0566667	0.02	0	1	0	1	1	3	1.66667	0.333333	2.18303	0.277516	0.999443
115196	'ZNF554'	mRNA	2.51	2.09	2.08	3.22	2.67	3.19	3.02667	2.22667	1.82	1.56	1.53	2.28	1.95	2.33	2.18667	1.63667	58.64	56.4	52.23	70.79	68.41	85.34	74.8467	55.7567	0.386497	0.109302	0.999443
1152	'CKB'	mRNA	675.76	794.42	732.81	739.86	719.68	750.44	736.66	734.33	489.98	590.63	538.04	523.98	525.53	548.58	532.697	539.55	8249	9967	8152	8896	8807	9237	8980	8789.33	-0.00802535	0.916573	0.999443
115201	'ATG4A'	mRNA	13.1	11.02	13.25	12.38	12.18	12.4	12.32	12.4567	9.5	8.19	9.73	8.77	8.9	9.06	8.91	9.14	289	256	288	278	282	280	280	277.667	-0.0287293	0.820218	0.999443
115207	'KCTD12'	mRNA	2.44	1.74	2.72	2.5	2.25	1.84	2.19667	2.3	1.77	1.29	1.99	1.77	1.64	1.35	1.58667	1.68333	161	122	178	168	153	126	149	153.667	-0.0883737	0.626946	0.999443
115209	'OMA1'	mRNA	7.59	5.44	9.22	7.28	7.53	7.91	7.57333	7.41667	5.51	4.04	6.77	5.16	5.5	5.78	5.48	5.44	134	102	161	131	137	145	137.667	132.333	0.0151808	0.93637	0.999443
115253422	'DUS4L-BCAP29'	mRNA	2.55	2.25	2.74	2.52	2.46	1.86	2.28	2.51333	1.85	1.67	2.01	1.79	1.79	1.36	1.64667	1.84333	183.16	170.8	195.23	183.81	181.49	137.53	167.61	183.063	-0.171706	0.287574	0.999443
115273	'RAB42'	mRNA	31.84	30.56	28.59	30.25	28.17	28.8	29.0733	30.33	23.08	22.72	20.99	21.43	20.57	21.05	21.0167	22.2633	606	620	537	586.27	554	571	570.423	587.667	-0.0832767	0.388675	0.999443
115286	'SLC25A26'	mRNA	15.46	12.87	12.91	14.82	14.16	14.47	14.4833	13.7467	11.21	9.57	9.48	10.49	10.34	10.57	10.4667	10.0867	239	205	196	236	215	223	224.667	213.333	0.0339201	0.809369	0.999443
115290	'FBXO17'	mRNA	18.16	18.77	17.96	17.84	17.56	17.53	17.6433	18.2967	13.17	13.96	13.19	12.64	12.82	12.81	12.7567	13.44	392	431	384	393	391	393	392.333	402.333	-0.0762731	0.482595	0.999443
115294	'PCMTD1'	mRNA	6.73	4.65	7.15	6.55	5.49	6.38	6.14	6.17667	4.88	3.46	5.25	4.64	4.01	4.66	4.43667	4.53	271	195	279	268	225	274	255.667	248.333	-0.000736	0.996182	0.999443
1153	'CIRBP'	mRNA	26.8	26.94	26.94	25.15	30.17	27.09	27.47	26.8933	19.43	20.03	19.78	17.81	22.03	19.81	19.8833	19.7467	454	476	416	408	449	463	440	448.667	-0.0668323	0.543554	0.999443
115330	'GPR146'	mRNA	2.74	3.48	3.22	3.36	3.76	3.02	3.38	3.14667	1.99	2.59	2.36	2.38	2.74	2.21	2.44333	2.31333	57	68	57	64	72	57	64.3333	60.6667	0.0449567	0.854222	0.999443
115353	'LRRC42'	mRNA	54.57	55.81	54.77	59.56	58.26	53.99	57.27	55.05	39.57	41.49	40.21	42.18	42.54	39.47	41.3967	40.4233	891	970	882	989	982	915	962	914.333	0.0329351	0.692505	0.999443
115361	'GBP4'	mRNA	0.03	0.06	0.13	0.05	0.08	0.1	0.0766667	0.0733333	0.02	0.05	0.09	0.03	0.06	0.07	0.0533333	0.0533333	1.83	4.47	8.32	3.02	5.64	6.52	5.06	4.87333	0.0660551	0.942871	0.999443
115362	'GBP5'	mRNA	1.17	1.46	1.58	1.32	1.11	0.81	1.08	1.40333	0.85	1.08	1.16	0.94	0.81	0.59	0.78	1.03	48.67	63.01	63.68	54.85	46.41	33.99	45.0833	58.4533	-0.431039	0.123578	0.999443
115399	'LRRC56'	mRNA	1.66	1.69	1.46	1.31	1.46	1.78	1.51667	1.60333	1.21	1.26	1.07	0.93	1.07	1.3	1.1	1.18	49	57	44	43	45	55	47.6667	50	-0.107182	0.698238	0.999443
1154	'CISH'	mRNA	5.69	5.33	5.76	5.79	5.48	6.02	5.76333	5.59333	4.13	3.96	4.23	4.1	4	4.4	4.16667	4.10667	116	120	115	120	116	123	119.667	117	-0.00782789	0.964913	0.999443
115416	'MALSU1'	mRNA	28.74	28.56	26.4	30.84	26.58	30.26	29.2267	27.9	20.84	21.24	19.38	21.84	19.41	22.12	21.1233	20.4867	786	844	764	734	800	857	797	798	-0.040459	0.670216	0.999443
115426	'UHRF2'	mRNA	14.47	12.54	13.88	13.86	13.93	12.93	13.5733	13.63	10.49	9.33	10.19	9.82	10.17	9.45	9.81333	10.0033	528	478	494	508	516	486	503.333	500	-0.0310265	0.75875	0.999443
1155	'TBCB'	mRNA	64.92	71.77	55.37	64.44	53.02	55.91	57.79	64.02	47.07	53.36	40.65	45.64	38.72	40.87	41.7433	47.0267	518	608	434	524	436	464	474.667	520	-0.171866	0.150804	0.999443
115509	'ZNF689'	mRNA	11.84	10.87	10.91	13.17	11.88	11.81	12.2867	11.2067	8.59	8.08	8.01	9.33	8.68	8.63	8.88	8.22667	431	421	394	489	446	446	460.333	415.333	0.107456	0.303001	0.999443
115548	'FCHO2'	mRNA	8.16	6.43	8.41	9.54	7.88	8.57	8.66333	7.66667	5.91	4.78	6.17	6.76	5.76	6.27	6.26333	5.62	302	253	310	311	292	319	307.333	288.333	0.0506037	0.694302	0.999443
115557	'ARHGEF25'	mRNA	0	0.04	0	0	0	0.04	0.0133333	0.0133333	0	0.03	0	0	0	0.03	0.01	0.01	0	1	0	0	0	1	0.333333	0.333333	-0.0405185	0.990099	0.999443
115560	'ZNF501'	mRNA	0.21	0.15	0.16	0.31	0.19	0.09	0.196667	0.173333	0.15	0.11	0.11	0.22	0.14	0.07	0.143333	0.123333	7	5	5	10	6	3	6.33333	5.66667	0.11318	0.88433	0.999443
115572	'TENT5B'	mRNA	4.14	4.3	4.36	4.57	3.56	4.4	4.17667	4.26667	3	3.2	3.2	3.23	2.6	3.22	3.01667	3.13333	97	107	101	109	86	107	100.667	101.667	-0.0556165	0.776238	0.999443
115650	'TNFRSF13C'	mRNA	0.57	0.88	0.7	0.51	0.5	0.57	0.526667	0.716667	0.41	0.66	0.51	0.36	0.37	0.42	0.383333	0.526667	23	38	28	21	21	24	22	29.6667	-0.470207	0.214891	0.999443
115677	'NOSTRIN'	mRNA	0.53	0.43	0.23	0.48	0.39	0.74	0.536667	0.396667	0.39	0.32	0.17	0.34	0.28	0.54	0.386667	0.293333	10	8	4	9	8	11	9.33333	7.33333	0.310458	0.636796	0.999443
115701	'ALPK2'	mRNA	0.21	0.25	0.27	0.26	0.26	0.32	0.28	0.243333	0.16	0.19	0.2	0.18	0.19	0.23	0.2	0.183333	17	21	21	21	21	26	22.6667	19.6667	0.165052	0.686116	0.999443
115703	'ARHGAP33'	mRNA	1.84	2.94	2.06	2.72	1.92	2.32	2.32	2.28	1.33	2.18	1.51	1.93	1.4	1.69	1.67333	1.67333	79	117	75	107	78	98	94.3333	90.3333	0.022101	0.920898	0.999443
115704	'EVI5L'	mRNA	27.4	29.55	23.85	26.69	25.62	28.37	26.8933	26.9333	19.86	21.97	17.51	18.9	18.71	20.74	19.45	19.78	1092	1253	943	1085	1053	1173	1103.67	1096	-0.0284395	0.772026	0.999443
115708	'TRMT61A'	mRNA	10.17	12.35	9.79	10.33	11.59	12.55	11.49	10.77	7.38	9.19	7.19	7.32	8.46	9.17	8.31667	7.92	332	429	317	344	390	425	386.333	359.333	0.0673119	0.615846	0.999443
115752	'DIS3L'	mRNA	8.5	7.83	8.27	9.9	9.09	7.76	8.91667	8.2	6.16	5.82	6.07	7.01	6.64	5.67	6.44	6.01667	335	328.04	321	397	367	319	361	328.013	0.0966068	0.414432	0.999443
115761	'ARL11'	mRNA	0.05	0	0.05	0.2	0.15	0.16	0.17	0.0333333	0.04	0	0.04	0.14	0.11	0.12	0.123333	0.0266667	1	0	1	5	3	4	4	0.666667	2.53832	0.0816702	0.999443
115811	'IQCD'	mRNA	8.96	11.22	9.76	5.97	9.86	7.64	7.82333	9.98	6.5	8.34	7.17	4.23	7.2	5.58	5.67	7.33667	146	181	153	102	167	134	134.333	160	-0.288493	0.131414	0.999443
115817	'DHRS1'	mRNA	24.28	22.99	21.45	23.52	20	23	22.1733	22.9067	17.61	17.09	15.75	16.65	14.61	16.81	16.0233	16.8167	312	314	272	308	265	307	293.333	299.333	-0.0696449	0.578493	0.999443
115825	'WDFY2'	mRNA	5.09	4.85	4.74	5.14	4.99	4.91	5.01333	4.89333	3.69	3.61	3.48	3.64	3.65	3.59	3.62667	3.59333	456	440	450	449	449	464	454	448.667	-0.023314	0.821131	0.999443
115827	'RAB3C'	mRNA	0	0	0	0	0.01	0	0.00333333	0	0	0	0	0	0.01	0	0.00333333	0	0	0	0	0	1	0	0.333333	0	0.92125	0.82138	0.999443
1159	'CKMT1B'	mRNA	6.52	6.14	6.24	3.84	6.46	5.68	5.32667	6.3	4.73	4.57	4.58	2.72	4.71	4.16	3.86333	4.62667	94.79	95.34	102.28	56.95	99.19	86.96	81.0333	97.47	-0.308726	0.179562	0.999443
115939	'TSR3'	mRNA	88.33	98.51	73.46	86.77	90.5	94.73	90.6667	86.7667	64.05	73.24	53.93	61.45	66.08	69.25	65.5933	63.74	923	1094	756	924	975	1029	976	924.333	0.0411284	0.710698	0.999443
115948	'CCDC151'	mRNA	2.04	2.11	2.22	1.91	1.81	1.92	1.88	2.12333	1.48	1.57	1.63	1.35	1.32	1.41	1.36	1.56	42	46	42	35	38	41	38	43.3333	-0.228708	0.439456	0.999443
115950	'ZNF653'	mRNA	3.45	3.11	1.79	3.24	2.93	3.14	3.10333	2.78333	2.5	2.31	1.31	2.29	2.14	2.29	2.24	2.04	72	69	37	69	63	68	66.6667	59.3333	0.129921	0.624447	0.999443
115992	'RNF166'	mRNA	28.17	29.66	26.23	27.29	34.1	30.09	30.4933	28.02	20.42	22.05	19.26	19.33	24.9	22	22.0767	20.5767	539	611	487	557	635	607	599.667	545.667	0.0980237	0.364353	0.999443
116028	'RMI2'	mRNA	25.68	28.85	24.84	22.37	25.66	25.32	24.45	26.4567	18.62	21.45	18.24	15.84	18.74	18.51	17.6967	19.4367	330	394	315	293	340	338	323.667	346.333	-0.135644	0.288999	0.999443
116039	'OSR2'	mRNA	8.12	8.77	10.26	9.61	9.74	6.76	8.70333	9.05	5.89	6.52	7.54	6.81	7.12	4.94	6.29	6.65	140	156	173	158	166	119	147.667	156.333	-0.124318	0.477742	0.999443
116064	'LRRC58'	mRNA	13.65	11.46	16.56	14.64	13.29	13.24	13.7233	13.89	9.9	8.52	12.16	10.37	9.71	9.68	9.92	10.1933	1154.97	1032	1392.92	1264.55	1160.01	1161.99	1195.52	1193.3	-0.0404072	0.695822	0.999443
116068	'LYSMD3'	mRNA	6.33	3.48	5.96	5.17	4.39	4.04	4.53333	5.25667	4.59	2.58	4.38	3.66	3.21	2.96	3.27667	3.85	280	164	262	234	200	186	206.667	235.333	-0.231731	0.191902	0.999443
116071	'BATF2'	mRNA	0.05	0.2	0.05	0.26	0.05	0	0.103333	0.1	0.04	0.15	0.04	0.19	0.04	0	0.0766667	0.0766667	1	4	1	5	1	0	2	2	-0.0541757	0.969684	0.999443
116092	'DNTTIP1'	mRNA	81.39	89.6	81.57	85.98	93.42	91.71	90.37	84.1867	59.01	66.62	59.89	60.9	68.22	67.04	65.3867	61.84	899	1052	888	968	1061	1053	1027.33	946.333	0.0799056	0.386351	0.999443
1161	'ERCC8'	mRNA	9.02	9.23	9.57	9.67	9.83	9.03	9.51	9.27333	6.54	6.86	7.03	6.85	7.18	6.6	6.87667	6.81	94	103.14	100	106	104	95.01	101.67	99.0467	-0.00258398	0.989306	0.999443
116113	'FOXP4'	mRNA	38.87	44.61	40.48	46.5	44.91	45.47	45.6267	41.32	28.19	33.16	29.72	32.94	32.8	33.24	32.9933	30.3567	1631	1985	1656	1980	1936	1979	1965	1757.33	0.121577	0.137908	0.999443
116115	'ZNF526'	mRNA	5.6	5.74	5.74	6.77	5.55	5.25	5.85667	5.69333	4.06	4.27	4.21	4.8	4.06	3.84	4.23333	4.18	230	251	234	284	236	224	248	238.333	0.0151996	0.910995	0.999443
116138	'KLHDC3'	mRNA	190.37	189.26	180.39	192.08	193.52	201.83	195.81	186.673	138.03	140.71	132.44	136.04	141.32	147.54	141.633	137.06	3377	3571	3165	3474	3540	3718	3577.33	3371	0.0465922	0.505028	0.999443
116143	'WDR92'	mRNA	9.47	8.54	10.45	10.14	9.02	9.31	9.49	9.48667	6.86	6.35	7.67	7.18	6.58	6.8	6.85333	6.96	220	223	241	247	220	241	236	228	0.00826857	0.951233	0.999443
116150	'NUS1'	mRNA	24.43	18.38	25.21	24.04	20.48	20.76	21.76	22.6733	17.72	13.67	18.51	17.03	14.95	15.18	15.72	16.6333	1224	980	1254	1229	1058	1079	1122	1152.67	-0.0821904	0.415061	0.999443
116151	'FAM210B'	mRNA	11.1	11.12	11.12	13.32	12.12	11.56	12.3333	11.1133	8.05	8.27	8.17	9.43	8.85	8.45	8.91	8.16333	334	356	332	409	376	361	382	340.667	0.124085	0.268984	0.999443
116211	'TM4SF19'	mRNA	8.32	6.95	7.92	8.14	6.49	6.48	7.03667	7.73	6.03	5.17	5.81	5.77	4.74	4.74	5.08333	5.67	69	60	62	68	55	56	59.6667	63.6667	-0.135794	0.577966	0.999443
116224	'FAM122A'	mRNA	2.94	3.05	2.82	3.18	3.03	2.76	2.99	2.93667	2.13	2.27	2.07	2.25	2.21	2.02	2.16	2.15667	170	188	162	188	181	166	178.333	173.333	0.000497	0.997385	0.999549
116225	'ZMYND19'	mRNA	112.24	114.07	104.37	114.92	124.11	127.51	122.18	110.227	81.38	84.81	76.63	81.39	90.63	93.21	88.41	80.94	1406	1521	1290	1465	1603	1658	1575.33	1405.67	0.126179	0.143268	0.999443
116228	'COX20'	mRNA	21.31	17.6	20.67	20.33	20.51	16.26	19.0333	19.86	15.45	13.09	15.18	14.4	14.98	11.89	13.7567	14.5733	481	421.31	463	471	478	384	444.333	455.103	-0.0758796	0.509662	0.999443
116236	'ABHD15'	mRNA	8.32	8.17	8.59	9.34	8.82	9.18	9.11333	8.36	6.04	6.07	6.3	6.61	6.44	6.71	6.58667	6.13667	296.99	310.01	304	340	324.54	340.01	334.85	303.667	0.101208	0.386019	0.999443
116238	'TLCD1'	mRNA	24.56	27.57	28.15	26.26	24.4	21.49	24.05	26.76	17.8	20.5	20.67	18.59	17.81	15.71	17.37	19.6567	219	267	247	244	223	204	223.667	244.333	-0.168953	0.224207	0.999443
116254	'GINM1'	mRNA	40.21	30.56	35.63	39.59	38.94	39.97	39.5	35.4667	29.15	22.72	26.16	28.03	28.44	29.22	28.5633	26.01	746	603	654	749	745	770	754.667	667.667	0.136245	0.169545	0.999443
1163	'CKS1B'	mRNA	410.96	375.62	447.06	368.59	366.25	337.77	357.537	411.213	297.98	279.26	328.24	261.04	267.45	246.92	258.47	301.827	2336	2266	2481	2132	2146	2000	2092.67	2361	-0.215303	0.00322967	0.740008
116362	'RBP7'	mRNA	0	0	0	0	0.24	0	0.08	0	0	0	0	0	0.18	0	0.06	0	0	0	0	0	1	0	0.333333	0	0.92125	0.82138	0.999443
116372	'LYPD1'	mRNA	0.1	0.05	0	0.05	0.05	0.03	0.0433333	0.05	0.07	0.04	0	0.04	0.04	0.02	0.0333333	0.0366667	2	1	0	1	1	1	1	1	-0.0351816	0.984852	0.999443
116379	'IL22RA2'	mRNA	0	0	0.04	0	0	0	0	0.0133333	0	0	0.03	0	0	0	0	0.01	0	0	1	0	0	0	0	0.333333	-1.0023	0.805965	0.999443
1164	'CKS2'	mRNA	272.7	206.53	279.42	235.71	206.66	210.44	217.603	252.883	197.73	153.55	205.15	166.93	150.91	153.83	157.223	185.477	1059	850	1050	930	827	853	870	986.333	-0.2236	0.0245654	0.999443
116412	'ZNF837'	mRNA	0.6	0.86	0.6	0.63	0.84	1.23	0.9	0.686667	0.43	0.64	0.44	0.45	0.61	0.9	0.653333	0.503333	13	17	11	17	20	27	21.3333	13.6667	0.606207	0.189267	0.999443
116444	'GRIN3B'	mRNA	0.06	0.07	0.04	0.11	0.06	0.04	0.07	0.0566667	0.04	0.05	0.03	0.08	0.04	0.03	0.05	0.04	2	2	1	3	2	1	2	1.66667	0.219097	0.872065	0.999443
116447	'TOP1MT'	mRNA	39.5	43.15	40.14	41.54	46.22	46.48	44.7467	40.93	28.64	32.08	29.47	29.42	33.75	33.98	32.3833	30.0633	735	855	739	788	887	898	857.667	776.333	0.105379	0.281505	0.999443
116449	'CLNK'	mRNA	0	0	0.03	0.02	0.03	0	0.0166667	0.01	0	0	0.02	0.01	0.02	0	0.01	0.00666667	0	0	1.9	0.99	2	0	0.996667	0.633333	0.870315	0.75751	0.999443
116461	'TSEN15'	mRNA	25.93	22.61	25.83	23.27	21.66	22.11	22.3467	24.79	18.8	16.81	18.97	16.48	15.81	16.16	16.15	18.1933	473	440	464	432	407	422	420.333	459	-0.16799	0.107591	0.999443
116496	'NIBAN1'	mRNA	1.79	2.04	2.09	1.97	1.62	1.78	1.79	1.97333	1.3	1.52	1.53	1.39	1.18	1.3	1.29	1.45	131	159	152	147	122	135	134.667	147.333	-0.171302	0.313679	0.999443
116534	'MRGPRE'	mRNA	0	0	0	0	0.02	0	0.00666667	0	0	0	0	0	0.02	0	0.00666667	0	0	0	0	0	1	0	0.333333	0	0.92125	0.82138	0.999443
116535	'MRGPRF'	mRNA	0.88	0.68	0.54	0.9	0.8	0.51	0.736667	0.7	0.64	0.51	0.4	0.64	0.58	0.38	0.533333	0.516667	19	15	14	19	19	11	16.3333	16	-0.0121375	0.979552	0.999443
116540	'MRPL53'	mRNA	234.47	218.45	243.4	226.81	240.19	229.2	232.067	232.107	170.01	162.41	178.71	160.63	175.39	167.55	167.857	170.377	602	593	597	590	635	616	613.667	597.333	-0.000947	0.992046	0.999443
116541	'MRPL54'	mRNA	44	56.69	38.15	49.8	48.07	45.18	47.6833	46.28	31.91	42.15	28.01	35.27	35.1	33.03	34.4667	34.0233	167	228	140	192	188	179	186.333	178.333	0.0247325	0.88492	0.999443
116729	'PPP1R27'	mRNA	0.17	0	0	0	0.16	0	0.0533333	0.0566667	0.12	0	0	0	0.12	0	0.04	0.04	1	0	0	0	1	0	0.333333	0.333333	-0.0405184	0.990082	0.999443
116832	'RPL39L'	mRNA	118.48	115.35	112.21	119.16	111.36	116.12	115.547	115.347	85.91	85.76	82.39	84.39	81.32	84.88	83.53	84.6867	608	628	561	622	589	621	610.667	599	-0.0123049	0.895814	0.999443
116835	'HSPA12B'	mRNA	0.08	0.06	0	0.04	0	0.06	0.0333333	0.0466667	0.06	0.05	0	0.03	0	0.05	0.0266667	0.0366667	2	1	0	1	0	1	0.666667	1	-0.625354	0.765981	0.999443
116840	'CNTROB'	mRNA	21.05	23.37	21.51	22.35	20.08	21.5	21.31	21.9767	15.26	17.37	15.79	15.83	14.66	15.71	15.4	16.14	775	872	762	828	759	803	796.667	803	-0.0518075	0.559291	0.999443
116841	'SNAP47'	mRNA	32.76	35.13	28.55	32.4	34.53	34.3	33.7433	32.1467	23.76	26.12	20.96	22.95	25.21	25.08	24.4133	23.6133	647	715	552	643	676	707	675.333	638	0.0437844	0.676388	0.999443
116842	'LEAP2'	mRNA	0.76	0.14	0.15	0.3	0.74	0.58	0.54	0.35	0.55	0.11	0.11	0.21	0.54	0.43	0.393333	0.256667	5	1	1	2	5	4	3.66667	2.33333	0.619194	0.581023	0.999443
116843	'SLC18B1'	mRNA	15.12	12.23	15.51	14.26	12.3	13.48	13.3467	14.2867	10.97	9.09	11.39	10.1	8.98	9.85	9.64333	10.4833	365	312	369	349	306	337	330.667	348.667	-0.118415	0.330812	0.999443
116844	'LRG1'	mRNA	1.74	2.05	1.75	2.12	2.2	2.74	2.35333	1.84667	1.26	1.52	1.29	1.5	1.6	2	1.7	1.35667	44.99	56.38	44.98	56	58.63	73.49	62.7067	48.7833	0.338716	0.200642	0.999443
116931	'MED12L'	mRNA	0.14	0.11	0.09	0.05	0.08	0.11	0.08	0.113333	0.1	0.08	0.06	0.04	0.06	0.08	0.06	0.08	9	8	6	5	5	9	6.33333	7.66667	-0.312459	0.659392	0.999443
116966	'WDR17'	mRNA	0	0.01	0	0	0	0	0	0.00333333	0	0.01	0	0	0	0	0	0.00333333	0	1	0	0	0	0	0	0.333333	-1.0023	0.805965	0.999443
116969	'ART5'	mRNA	0	0	0	0.18	0.09	0	0.09	0	0	0	0	0.13	0.07	0	0.0666667	0	0	0	0	2	1	0	1	0	2.38662	0.390025	0.999443
116983	'ACAP3'	mRNA	42.38	50.76	38.51	46.81	44.43	49.18	46.8067	43.8833	30.73	37.74	28.27	33.15	32.44	35.95	33.8467	32.2467	1662	2115	1505	1879	1786	2007	1890.67	1760.67	0.064497	0.525551	0.999443
116984	'ARAP2'	mRNA	1.33	0.93	1.51	1.42	1.12	1.22	1.25333	1.25667	0.97	0.69	1.11	1.01	0.82	0.89	0.906667	0.923333	107	80	121	118	95	103	105.333	102.667	-0.00683151	0.973595	0.999443
116985	'ARAP1'	mRNA	26.14	30.15	23.74	27.78	26.8	29.77	28.1167	26.6767	18.95	22.41	17.43	19.68	19.57	21.76	20.3367	19.5967	1380	1689	1243	1495	1460	1632	1529	1437.33	0.0509664	0.606413	0.999443
116986	'AGAP2'	mRNA	0.12	0.13	0.1	0.09	0.05	0.16	0.1	0.116667	0.09	0.1	0.07	0.07	0.04	0.12	0.0766667	0.0866667	6	6	5	5	3	7	5	5.66667	-0.22036	0.784687	0.999443
116987	'AGAP1'	mRNA	6.83	6.27	6.42	7.35	6.4	6.98	6.91	6.50667	4.95	4.66	4.71	5.21	4.67	5.1	4.99333	4.77333	763	755	699	829.16	763	786	792.72	739	0.0604611	0.485017	0.999443
116988	'AGAP3'	mRNA	52.89	57.93	50.36	54.02	57.14	57.47	56.21	53.7267	38.35	43.07	36.98	38.26	41.73	42.01	40.6667	39.4667	1638	1881	1509	1673	1811	1861	1781.67	1676	0.0501764	0.570606	0.999443
117143	'TADA1'	mRNA	10.72	9.89	12.72	11.19	12.02	10.28	11.1633	11.11	7.77	7.35	9.34	7.92	8.78	7.51	8.07	8.15333	217	213	255	231	251	216	232.667	228.333	-0.0141214	0.920958	0.999443
117144	'CATSPER1'	mRNA	0.51	0.48	0.67	0.73	0.57	0.49	0.596667	0.553333	0.37	0.35	0.49	0.52	0.41	0.36	0.43	0.403333	13	13	17	19	15	13	15.6667	14.3333	0.0840609	0.862316	0.999443
117145	'THEM4'	mRNA	14.2	11.65	12.2	14.88	12.72	11.67	13.09	12.6833	10.29	8.66	8.96	10.54	9.29	8.53	9.45333	9.30333	328	274	303	360	323	282	321.667	301.667	0.0501568	0.697148	0.999443
117155	'CATSPER2'	mRNA	0.35	0.28	0.24	0.47	0.17	0.23	0.29	0.29	0.26	0.21	0.18	0.33	0.13	0.16	0.206667	0.216667	12	10	6	14	7	7	9.33333	9.33333	-0.044466	0.94364	0.999443
117156	'SCGB3A2'	mRNA	4.31	4.75	3.75	3.19	4.53	6.52	4.74667	4.27	3.12	3.53	2.75	2.26	3.31	4.77	3.44667	3.13333	12	14	10	9	13	19	13.6667	12	0.152745	0.775453	0.999443
117157	'SH2D1B'	mRNA	0	0.04	0.08	0	0.08	0.08	0.0533333	0.04	0	0.03	0.06	0	0.06	0.06	0.04	0.03	0	1	2	0	2	2	1.33333	1	0.382361	0.831515	0.999443
117166	'WFIKKN1'	mRNA	9.78	10.29	9.08	10.94	11.58	11.05	11.19	9.71667	7.09	7.65	6.67	7.75	8.46	8.08	8.09667	7.13667	185	207	170	211	226	217	218	187.333	0.179562	0.215151	0.999443
117177	'RAB3IP'	mRNA	6.39	5.63	5.97	5.98	4.84	4.34	5.05333	5.99667	4.64	4.19	4.38	4.24	3.54	3.17	3.65	4.40333	268.39	245.03	252.43	299.77	264.04	270.04	277.95	255.283	0.081328	0.522416	0.999443
117178	'SSX2IP'	mRNA	8.8	5.29	7.88	7.93	6.49	7.1	7.17333	7.32333	6.38	3.94	5.78	5.62	4.74	5.19	5.18333	5.36667	304	243	322	316	264	260	280	289.667	-0.0925521	0.507153	0.999443
117195	'MRGPRX3'	mRNA	0	0.22	0.2	0.19	0.06	0.08	0.11	0.14	0	0.16	0.14	0.14	0.05	0.06	0.0833333	0.1	0	3.49	2.93	2.98	1	1.26	1.74667	2.14	-0.367164	0.813245	0.999443
117246	'FTSJ3'	mRNA	53.31	53.95	49.9	55.02	52.21	55.51	54.2467	52.3867	38.66	40.11	36.64	38.96	38.13	40.58	39.2233	38.47	1934	2068	1792	2029	1951	2078	2019.33	1931.33	0.0246321	0.738803	0.999443
117248	'GALNT15'	mRNA	0.03	0.01	0	0	0.03	0	0.01	0.0133333	0.02	0.01	0	0	0.02	0	0.00666667	0.01	1	1	0	0	1	0	0.333333	0.666667	-0.928857	0.726607	0.999443
117283	'IP6K3'	mRNA	0.07	0	0.08	0	0	0.04	0.0133333	0.05	0.05	0	0.06	0	0	0.03	0.01	0.0366667	2	0	2	0	0	1	0.333333	1.33333	-1.94292	0.377241	0.999443
1173	'AP2M1'	mRNA	438.34	446.88	437.77	483.95	462.96	440.41	462.44	440.997	317.83	332.25	321.42	342.74	338.07	321.95	334.253	323.833	8079	8760	7983	9097	8799	8429	8775	8274	0.0443217	0.462731	0.999443
1174	'AP1S1'	mRNA	79.52	81.99	80.72	81.54	74.84	75.69	77.3567	80.7433	57.66	60.96	59.27	57.75	54.65	55.33	55.91	59.2967	845	926	845	883	820	836	846.333	872	-0.0837601	0.320349	0.999443
1175	'AP2S1'	mRNA	359.75	354.7	316.78	363.54	358.79	348.93	357.087	343.743	260.85	263.71	232.59	257.47	262	255.07	258.18	252.383	2101	2207	1806	2158	2166	2122	2148.67	2038	0.0370641	0.63666	0.999443
117531	'TMC1'	mRNA	0.03	0.03	0	0.07	0.07	0.05	0.0633333	0.02	0.02	0.02	0	0.05	0.05	0.04	0.0466667	0.0133333	1	1	0	3	2	3	2.66667	0.666667	1.96194	0.218877	0.999443
117581	'TWIST2'	mRNA	60.18	59.51	53.77	59.79	58.95	60.44	59.7267	57.82	43.63	44.24	39.48	42.35	43.04	44.18	43.19	42.45	707	740	622	713	707	736	718.667	689.667	0.0200445	0.830779	0.999443
117583	'PARD3B'	mRNA	0.26	0.18	0.17	0.22	0.16	0.21	0.196667	0.203333	0.19	0.13	0.12	0.15	0.12	0.15	0.14	0.146667	24	17	15	20	15	19	18	18.6667	-0.0934665	0.832898	0.999443
117584	'RFFL'	mRNA	3.68	3.43	4.07	3.76	3.59	3.22	3.52333	3.72667	2.67	2.55	2.99	2.67	2.62	2.36	2.55	2.73667	282.54	280.7	310.46	295.01	284.6	256.6	278.737	291.233	-0.104321	0.408691	0.999443
1176	'AP3S1'	mRNA	35.64	26.71	34.95	30.85	28.67	32.93	30.8167	32.4333	25.84	19.86	25.66	21.85	20.93	24.07	22.2833	23.7867	426	349	411	384	350	399	377.667	395.333	-0.107291	0.368395	0.999443
117608	'ZNF354B'	mRNA	5.8	5.87	6.1	6.05	5.5	6.59	6.04667	5.92333	4.2	4.37	4.48	4.29	4.02	4.82	4.37667	4.35	162.11	174.68	169.13	172.63	158.68	191.22	174.177	168.64	0.00472199	0.975753	0.999443
117854	'TRIM6'	mRNA	3.77	2.84	3.11	2.8	3.4	2.9	3.03333	3.24	2.74	2.11	2.28	1.98	2.48	2.12	2.19333	2.37667	125.05	101	102	96	118	101	105	109.35	-0.0974836	0.618462	0.999443
118	'ADD1'	mRNA	26.63	28.69	27.32	29.87	28.99	28.06	28.9733	27.5467	19.31	21.33	20.06	21.16	21.17	20.51	20.9467	20.2333	1090	1233	1111	1246	1227	1194	1222.33	1144.67	0.0544861	0.493349	0.999443
1181	'CLCN2'	mRNA	4.25	4.41	3.5	4.8	4.55	3.98	4.44333	4.05333	3.08	3.28	2.57	3.4	3.32	2.91	3.21	2.97667	141	147	110	154	146	135	145	132.667	0.0882867	0.610548	0.999443
1182	'CLCN3'	mRNA	17.4	13.17	16.85	19	16.97	15.71	17.2267	15.8067	12.62	9.79	12.37	13.46	12.39	11.48	12.4433	11.5933	925	739	896	1025	922	875	940.667	853.333	0.0978366	0.330078	0.999443
1183	'CLCN4'	mRNA	0.33	0.37	0.22	0.3	0.29	0.28	0.29	0.306667	0.24	0.28	0.16	0.21	0.21	0.21	0.21	0.226667	23	28	16	22	21	21	21.3333	22.3333	-0.104694	0.797118	0.999443
1184	'CLCN5'	mRNA	2.36	2.64	1.41	1.3	1.53	3.2	2.01	2.13667	1.71	1.96	1.04	0.92	1.12	2.34	1.46	1.57	110.82	116	117	104	94	121	106.333	114.607	-0.144967	0.444334	0.999443
118424	'UBE2J2'	mRNA	50.79	50.68	48.82	56.27	48.11	49.03	51.1367	50.0967	36.83	37.68	35.84	39.85	35.13	35.84	36.94	36.7833	1140	1215	1086	1288	1118	1146	1184	1147	0.00457485	0.954959	0.999443
118426	'BORCS5'	mRNA	13.8	10.59	14.02	14.28	13.8	11.5	13.1933	12.8033	10	7.88	10.3	10.11	10.08	8.4	9.53	9.39333	245	182	212	239	225	218	227.333	213	0.0523975	0.720907	0.999443
118427	'OLFM3'	mRNA	0	0	0.03	0	0	0	0	0.01	0	0	0.02	0	0	0	0	0.00666667	0	0	1	0	0	0	0	0.333333	-1.0023	0.805965	0.999443
118429	'ANTXR2'	mRNA	0.77	0.8	0.87	1.06	0.86	1.48	1.13333	0.813333	0.56	0.6	0.64	0.75	0.63	1.08	0.82	0.6	37	41	39	45	49	62	52	39	0.376445	0.190506	0.999443
118442	'GPR62'	mRNA	0	0.05	0	0	0	0	0	0.0166667	0	0.03	0	0	0	0	0	0.01	0	1	0	0	0	0	0	0.333333	-1.0023	0.805965	0.999443
118460	'EXOSC6'	mRNA	3.79	4.27	3.74	4.51	4.17	4.15	4.27667	3.93333	2.74	3.17	2.74	3.19	3.05	3.03	3.09	2.88333	205	246	201	249	233	233	238.333	217.333	0.0928498	0.502236	0.999443
118461	'C10orf71'	mRNA	0	0.02	0.02	0	0	0	0	0.0133333	0	0.01	0.01	0	0	0	0	0.00666667	0	1	1	0	0	0	0	0.666667	-1.90011	0.552356	0.999443
118471	'PRAP1'	mRNA	0.2	0.36	0.58	0.2	0.37	0.19	0.253333	0.38	0.15	0.26	0.43	0.14	0.27	0.14	0.183333	0.28	1	2	3	1	2	1	1.33333	2	-0.62556	0.66227	0.999443
118472	'ZNF511'	mRNA	49.69	46.66	40.99	49.1	48.41	47.46	48.3233	45.78	36.03	34.69	30.09	34.77	35.35	34.7	34.94	33.6033	450	449	365	453	452	447	450.667	421.333	0.0576864	0.603572	0.999443
118487	'CHCHD1'	mRNA	99.86	91.58	96.99	103.26	97.32	103.34	101.307	96.1433	72.41	68.09	71.21	73.13	71.06	75.54	73.2433	70.57	646	629	614	680	649	696	675	629.667	0.059919	0.510721	0.999443
118490	'MSS51'	mRNA	0.25	0.2	0.3	0.16	0.28	0.24	0.226667	0.25	0.18	0.15	0.22	0.12	0.21	0.18	0.17	0.183333	6	5	7	4	7	6	5.66667	6	-0.120814	0.874974	0.999443
118491	'CFAP70'	mRNA	0.03	0.12	0.03	0.11	0.03	0.13	0.09	0.06	0.02	0.09	0.02	0.08	0.02	0.09	0.0633333	0.0433333	1	5	1	4	1	5	3.33333	2.33333	0.477208	0.683166	0.999443
1185	'CLCN6'	mRNA	6.81	6.53	6.97	6.34	6.7	6.26	6.43333	6.77	4.94	4.85	5.12	4.49	4.9	4.57	4.65333	4.97	401	409	408	381	407	382	390	406	-0.098126	0.366556	0.999443
1186	'CLCN7'	mRNA	41.23	44.69	37	42.45	42.92	43.62	42.9967	40.9733	29.9	33.23	27.17	30.06	31.34	31.89	31.0967	30.1	1779	2052	1585	1869	1910	1953	1910.67	1805.33	0.0433336	0.619837	0.999443
118611	'C10orf90'	mRNA	0.07	0	0.03	0.03	0.06	0.03	0.04	0.0333333	0.05	0	0.02	0.02	0.05	0.02	0.03	0.0233333	2	0	1	1	2	1	1.33333	1	0.375393	0.828541	0.999443
118663	'BTBD16'	mRNA	0.21	0.39	0.11	0.15	0.39	0.22	0.253333	0.236667	0.15	0.29	0.08	0.11	0.28	0.16	0.183333	0.173333	4	8	2	3	8	4	5	4.66667	0.0693217	0.937415	0.999443
118672	'PSTK'	mRNA	1.88	2.1	2.15	2.94	2.29	2.92	2.71667	2.04333	1.36	1.56	1.57	2.08	1.67	2.13	1.96	1.49667	20	24	22	32	25	31	29.3333	22	0.373637	0.315555	0.999443
1187	'CLCNKA'	mRNA	0.47	0.47	0.3	0.2	0.45	0.4	0.35	0.413333	0.34	0.35	0.22	0.14	0.33	0.29	0.253333	0.303333	11.01	11.55	7.31	4.98	11.06	10.17	8.73667	9.95667	-0.246384	0.701275	0.999443
118738	'ZNF488'	mRNA	3.9	3.35	3.64	3.91	2.32	2.63	2.95333	3.63	2.83	2.49	2.68	2.77	1.7	1.92	2.13	2.66667	143	133	130	144	87	99	110	135.333	-0.343439	0.0790017	0.999443
118788	'PIK3AP1'	mRNA	0.04	0.04	0	0	0	0	0	0.0266667	0.03	0.03	0	0	0	0	0	0.02	2	2	0	0	0	0	0	1.33333	-2.88943	0.240351	0.999443
1188	'CLCNKB'	mRNA	1.14	0.82	0.56	1.05	0.91	1.5	1.15333	0.84	0.82	0.61	0.41	0.74	0.66	1.1	0.833333	0.613333	24.99	19.45	11.69	23.02	20.94	33.83	25.93	18.71	0.456024	0.288977	0.999443
118812	'MORN4'	mRNA	4.09	3.69	3.78	3.89	3.55	3.4	3.61333	3.85333	2.97	2.75	2.78	2.75	2.6	2.49	2.61333	2.83333	94	90	86	91	84	81	85.3333	90	-0.117843	0.564609	0.999443
118813	'ZFYVE27'	mRNA	22.01	24.34	21.54	20.75	19.51	22.65	20.97	22.63	15.96	18.1	15.81	14.69	14.25	16.56	15.1667	16.6233	649	754	617	618	594	687	633	673.333	-0.128162	0.21461	0.999443
118881	'COMTD1'	mRNA	84.83	101.5	82.34	85.75	100.51	91.32	92.5267	89.5567	61.51	75.47	60.45	60.73	73.4	66.75	66.96	65.81	840	1059	796	860	992	957	936.333	898.333	0.0223452	0.835618	0.999443
118924	'FRA10AC1'	mRNA	8.77	7.35	9.72	9.42	7.87	7.65	8.31333	8.61333	6.36	5.47	7.14	6.67	5.75	5.59	6.00333	6.32333	280	250	307	305	258	252	271.667	279	-0.0815667	0.543668	0.999443
118932	'ANKRD22'	mRNA	0	0.02	0.03	0	0.02	0.02	0.0133333	0.0166667	0	0.02	0.02	0	0.02	0.02	0.0133333	0.0133333	0	1	1	0	1	1	0.666667	0.666667	-0.0299382	0.98956	0.999443
118980	'SFXN2'	mRNA	2.06	1.91	1.86	2.79	1.69	1.22	1.9	1.94333	1.49	1.42	1.36	1.98	1.23	0.89	1.36667	1.42333	50	48.17	52	68.63	48.37	32	49.6667	50.0567	-0.0651759	0.824527	0.999443
118987	'PDZD8'	mRNA	8.36	6.58	8.97	7.85	8.4	8.52	8.25667	7.97	6.07	4.89	6.59	5.56	6.13	6.22	5.97	5.85	496	468	548	545	531	515	530.333	504	0.0318411	0.759342	0.999443
119016	'AGAP4'	mRNA	9.22	11.39	8.79	9.27	9.17	10.77	9.73667	9.8	6.69	8.46	6.45	6.56	6.69	7.87	7.04	7.2	233.51	302.79	219.33	238.64	240.67	282.16	253.823	251.877	-0.0266184	0.856915	0.999443
119032	'BORCS7'	mRNA	2.79	2.09	2.66	3.09	2.95	3.25	3.09667	2.51333	2.02	1.56	1.95	2.19	2.15	2.38	2.24	1.84333	60	47	51	65.76	62	73	66.92	52.6667	0.299822	0.231884	0.999443
1191	'CLU'	mRNA	421.83	452.09	393.56	422.77	449.51	445.34	439.207	422.493	305.86	336.12	288.95	299.41	328.24	325.55	317.733	310.31	11585	13209	10715	11845	12731	12695	12423.7	11836.3	0.0317426	0.679558	0.999443
1192	'CLIC1'	mRNA	635.63	626.55	618.25	644.63	605.77	628.09	626.163	626.81	460.88	465.83	453.92	456.54	442.35	459.14	452.677	460.21	6906	7239	6619	7135	6784	7092	7003.67	6921.33	-0.0230977	0.698755	0.999443
1193	'CLIC2'	mRNA	0	0	0.04	0.04	0	0.04	0.0266667	0.0133333	0	0	0.03	0.03	0	0.03	0.02	0.01	0	0	1	1	0	1	0.666667	0.333333	0.84846	0.750029	0.999443
119385	'AGAP11'	mRNA	0.33	0.27	0.62	0.27	0.28	0.53	0.36	0.406667	0.24	0.2	0.45	0.19	0.21	0.39	0.263333	0.296667	12.08	10.43	22.32	10.07	10.7	20.17	13.6467	14.9433	-0.178754	0.739358	0.999443
119391	'GSTO2'	mRNA	2.79	2.24	1.72	2.96	2	2.09	2.35	2.25	2.02	1.67	1.26	2.1	1.46	1.53	1.69667	1.65	65	63	45	75	57	57	63	57.6667	0.0861841	0.736329	0.999443
119392	'SFR1'	mRNA	7.05	6.34	6.87	6.86	4.75	4.86	5.49	6.75333	5.11	4.71	5.05	4.85	3.47	3.55	3.95667	4.95667	98	90	92	97	66	70	77.6667	93.3333	-0.308705	0.154722	0.999443
119395	'CALHM3'	mRNA	3.85	3.19	2.97	3.2	2.34	3.64	3.06	3.33667	2.79	2.37	2.18	2.26	1.71	2.66	2.21	2.44667	59	52	45	50	37	58	48.3333	52	-0.145669	0.602141	0.999443
1195	'CLK1'	mRNA	32.16	30.58	32.75	31.37	27.85	31.58	30.2667	31.83	23.32	22.73	24.05	22.22	20.34	23.09	21.8833	23.3667	566	571	568	563	505	575	547.667	568.333	-0.0942756	0.334841	0.999443
119504	'ANAPC16'	mRNA	63	54.69	60.39	60.94	58.91	60.89	60.2467	59.36	45.68	40.66	44.34	43.16	43.02	44.51	43.5633	43.56	2225	2052.01	2098.04	2188.95	2146.27	2223.82	2186.35	2125.02	0.000178	0.997978	0.999549
119559	'SFXN4'	mRNA	17.54	16.2	17.02	17.85	16.08	14.84	16.2567	16.92	12.72	12.05	12.5	12.64	11.74	10.85	11.7433	12.4233	267	259	249	269	246	237	250.667	258.333	-0.0846506	0.509906	0.999443
119587	'CPXM2'	mRNA	0	0.04	0.04	0.04	0.04	0.04	0.04	0.0266667	0	0.03	0.03	0.03	0.03	0.03	0.03	0.02	0	1	1	1	1	1	1	0.666667	0.543302	0.787609	0.999443
1196	'CLK2'	mRNA	29.78	32.56	31.46	30.99	28.41	31.99	30.4633	31.2667	21.59	24.21	23.1	21.95	20.75	23.38	22.0267	22.9667	616	719	649	652	609	688	649.667	661.333	-0.0657453	0.501219	0.999443
119710	'IFTAP'	mRNA	2.98	1.51	2.09	2.34	3.06	1.52	2.30667	2.19333	2.16	1.13	1.53	1.65	2.23	1.11	1.66333	1.60667	17	10	11	15	19	11	15	12.6667	0.203705	0.692804	0.999443
1198	'CLK3'	mRNA	56.89	60.32	50.5	52.11	54.45	59.43	55.33	55.9033	41.25	44.84	37.08	36.91	39.76	43.45	40.04	41.0567	1068	1232	1009	1012	1061	1170	1081	1103	-0.0673065	0.478021	0.999443
120	'ADD3'	mRNA	7.34	6.19	7.34	7.68	6.68	6.89	7.08333	6.95667	5.32	4.6	5.39	5.44	4.88	5.04	5.12	5.10333	331	298	329	354	309	323	328.667	319.333	-0.00034	0.997729	0.999549
1200	'TPP1'	mRNA	85.18	78.92	97.23	91.61	89.28	83.54	88.1433	87.11	61.76	58.68	71.39	64.88	65.2	61.07	63.7167	63.9433	3039	2996	3442	3335	3285	3093	3237.67	3159	-0.00635208	0.933563	0.999443
120071	'LARGE2'	mRNA	0	0.12	0	0.06	0	0.05	0.0366667	0.04	0	0.09	0	0.04	0	0.04	0.0266667	0.03	0	3	0	1	0	1	0.666667	1	-0.619431	0.780642	0.999443
1201	'CLN3'	mRNA	40.76	39.31	46.88	37.77	43.61	40.51	40.63	42.3167	29.55	29.22	34.42	26.75	31.85	29.61	29.4033	31.0633	687	704	775	649	758	708	705	722	-0.0741166	0.463895	0.999443
120103	'SLC36A4'	mRNA	8.82	7.33	10.23	9.53	8.51	8.21	8.75	8.79333	6.39	5.45	7.51	6.75	6.21	6	6.32	6.45	373	331	418	414	350	359	374.333	374	-0.0418823	0.733755	0.999443
120224	'TMEM45B'	mRNA	0.1	0.16	0.22	0.2	0.04	0	0.08	0.16	0.07	0.12	0.16	0.14	0.03	0	0.0566667	0.116667	2.1	3.64	4.63	4.46	0.99	0	1.81667	3.45667	-1.23397	0.380084	0.999443
120227	'CYP2R1'	mRNA	0.33	0.12	0.2	0	0.09	0.13	0.0733333	0.216667	0.24	0.09	0.15	0	0.07	0.1	0.0566667	0.16	5	3	5	0	2.15	4	2.05	4.33333	-1.14778	0.303504	0.999443
1203	'CLN5'	mRNA	2.58	1.71	2.63	2.6	2.18	1.91	2.23	2.30667	1.87	1.27	1.93	1.84	1.6	1.39	1.61	1.69	142	100	144	146	124	109	126.333	128.667	-0.0704292	0.715616	0.999443
120379	'PIH1D2'	mRNA	1.34	2.65	1.37	3.09	2.14	1.73	2.32	1.78667	0.97	1.97	1.01	2.18	1.56	1.26	1.66667	1.31667	14	29	17	33	20	19	24	20	0.219659	0.609204	0.999443
120526	'DNAJC24'	mRNA	8.19	7.42	10.22	8.88	7.2	7.31	7.79667	8.61	5.94	5.51	7.5	6.29	5.26	5.35	5.63333	6.31667	245	236	303	271	222	227	240	261.333	-0.166501	0.247555	0.999443
120534	'ARL14EP'	mRNA	8.75	8.33	8.08	9.37	9.68	8.29	9.11333	8.38667	6.34	6.19	5.94	6.63	7.07	6.06	6.58667	6.15667	218	215	195	231	238	210	226.333	209.333	0.0724235	0.601781	0.999443
1207	'CLNS1A'	mRNA	152.7	146.99	159.9	140.04	156.09	158.69	151.607	153.197	110.72	109.28	117.4	99.18	113.98	116	109.72	112.467	2194	2129	2318	2068	2197	2223	2162.67	2213.67	-0.0737555	0.333206	0.999443
120863	'DEPDC4'	mRNA	1.94	1.78	2.56	2.67	2.65	2.55	2.62333	2.09333	1.41	1.32	1.88	1.89	1.94	1.86	1.89667	1.53667	22	25	32	33	33	30	32	26.3333	0.23909	0.497325	0.999443
120892	'LRRK2'	mRNA	0.02	0.08	0.02	0.03	0.06	0.06	0.05	0.04	0.01	0.06	0.01	0.02	0.04	0.04	0.0333333	0.0266667	1	7	1	3	3	3	3	3	-0.0330641	0.976566	0.999443
1209	'CLPTM1'	mRNA	58.04	62.5	65.41	71.21	70.28	62.63	68.04	61.9833	42.08	46.47	48.02	50.43	51.32	45.78	49.1767	45.5233	1415	1621	1580	1771	1767	1585	1707.67	1538.67	0.109341	0.176298	0.999443
120939	'TMEM52B'	mRNA	0.79	0.89	0.93	0.85	0.42	0.71	0.66	0.87	0.57	0.66	0.69	0.6	0.31	0.52	0.476667	0.64	20	24	24	22	11	20	17.6667	22.6667	-0.403153	0.348233	0.999443
121053	'C12orf45'	mRNA	1.04	0.9	0.95	0.84	0.98	0.88	0.9	0.963333	0.76	0.67	0.7	0.59	0.72	0.64	0.65	0.71	268.01	245.36	244.14	220.01	259.76	235.02	238.263	252.503	-0.123655	0.362851	0.999443
1211	'CLTA'	mRNA	231.51	225.2	196.91	260.07	248.9	241.78	250.25	217.873	167.86	167.43	144.57	184.19	181.76	176.74	180.897	159.953	1955	1979	1583	2160	2075	2084	2106.33	1839	0.15639	0.0602437	0.999443
1212	'CLTB'	mRNA	241.67	268.45	210.68	267.03	249.73	253.95	256.903	240.267	175.23	199.59	154.68	189.11	182.36	185.64	185.703	176.5	2194	2587	1882	2460	2324	2385	2389.67	2221	0.0666113	0.466914	0.999443
121227	'LRIG3'	mRNA	3.47	2.81	3.16	3.8	4.48	3.46	3.91333	3.14667	2.51	2.09	2.32	2.69	3.27	2.53	2.83	2.30667	137	125	131	162	185	140	162.333	131	0.268903	0.115591	0.999443
121260	'SLC15A4'	mRNA	8.27	8.37	8.71	7.81	7.47	7.64	7.64	8.45	6	6.23	6.4	5.53	5.46	5.58	5.52333	6.21	228	246	238	220	212	219	217	237.333	-0.169774	0.205674	0.999443
121268	'RHEBL1'	mRNA	16.94	18.26	17.32	14.74	17.34	18.02	16.7	17.5067	12.28	13.57	12.72	10.44	12.66	13.17	12.09	12.8567	173	197	172	153	184	190	175.667	180.667	-0.0786303	0.618897	0.999443
121274	'ZNF641'	mRNA	4.86	3.89	4.6	5.52	5.07	4.89	5.16	4.45	3.53	2.89	3.38	3.91	3.7	3.58	3.73	3.26667	371	317	346	440	397	377	404.667	344.667	0.189579	0.101909	0.999443
1213	'CLTC'	mRNA	51.48	41.78	52.72	56.97	44.36	44.75	48.6933	48.66	37.33	31.06	38.71	40.35	32.39	32.71	35.15	35.7	4619	3991	4703	5215	4107	4164	4495.33	4437.67	-0.0256824	0.774653	0.999443
121340	'SP7'	mRNA	0.07	0	0.03	0	0	0	0	0.0333333	0.05	0	0.02	0	0	0	0	0.0233333	2	0	1	0	0	0	0	1	-2.48665	0.363273	0.999443
121355	'GTSF1'	mRNA	0.67	0.16	0.71	0.66	0.65	0.17	0.493333	0.513333	0.48	0.12	0.52	0.46	0.47	0.12	0.35	0.373333	4	1	4	4	4	1	3	3	-0.0480246	0.965243	0.999443
121441	'NEDD1'	mRNA	12.08	9.85	12.21	12.12	11.52	10.86	11.5	11.38	8.76	7.33	8.96	8.58	8.42	7.94	8.31333	8.35	445	380	459	449	441	428	439.333	428	-0.00387309	0.97247	0.999443
121457	'IKBIP'	mRNA	58.52	57.43	65.3	68.31	60.59	61.69	63.53	60.4167	42.43	42.7	47.94	48.38	44.25	45.1	45.91	44.3567	917	945	1046	1143	1008	1009	1053.33	969.333	0.0774479	0.380588	0.999443
121504	'H4-16'	mRNA	0	1.13	0.63	0.59	0.58	1.71	0.96	0.586667	0	0.84	0.47	0.42	0.42	1.25	0.696667	0.436667	0	2	1	1	1	3	1.66667	1	0.703926	0.67092	0.999443
121512	'FGD4'	mRNA	0.7	0.66	0.7	0.71	0.58	0.91	0.733333	0.686667	0.51	0.49	0.51	0.5	0.42	0.67	0.53	0.503333	45	46	60	57	49	66	57.3333	50.3333	0.146142	0.586817	0.999443
121536	'AEBP2'	mRNA	19.33	16.64	22.41	24.15	21.72	16.16	20.6767	19.46	14.02	12.37	16.45	17.1	15.86	11.81	14.9233	14.28	655	610	749	716	656	575	649	671.333	-0.0920246	0.395495	0.999443
121601	'ANO4'	mRNA	0.75	0.7	0.7	0.77	0.87	0.95	0.863333	0.716667	0.55	0.52	0.51	0.54	0.63	0.69	0.62	0.526667	31	31	29	34	38	42	38	30.3333	0.286232	0.376029	0.999443
121642	'ALKBH2'	mRNA	30.52	32.12	29.68	28.77	34.5	31.54	31.6033	30.7733	22.13	23.88	21.79	20.38	25.19	23.05	22.8733	22.6	273	308	260	263	322	296	293.667	280.333	0.0289015	0.827871	0.999443
121643	'FOXN4'	mRNA	0	0	0.03	0	0.03	0	0.01	0.01	0	0	0.02	0	0.02	0	0.00666667	0.00666667	0	0	1	0	1	0	0.333333	0.333333	-0.0405184	0.99005	0.999443
121665	'SPPL3'	mRNA	13.67	11.01	13.8	13.74	15.28	12.66	13.8933	12.8267	9.91	8.18	10.13	9.73	11.15	9.26	10.0467	9.40667	521	469.68	535	537	620	534	563.667	508.56	0.108809	0.317051	0.999443
121793	'TEX29'	mRNA	0.19	0	0.39	0	0	0.18	0.06	0.193333	0.14	0	0.29	0	0	0.13	0.0433333	0.143333	1	0	2	0	0	1	0.333333	1	-1.53094	0.520391	0.999443
122183	'PRR20A'	mRNA	0.01	0	0	0	0	0	0	0.00333333	0.01	0	0	0	0	0	0	0.00333333	0.2	0	0	0	0	0	0	0.0666667
122402	'TDRD9'	mRNA	0	0.04	0	0.05	0.05	0.03	0.0433333	0.0133333	0	0.03	0	0.04	0.04	0.02	0.0333333	0.01	0	2	0	2	2	1	1.66667	0.666667	1.28734	0.487402	0.999443
122416	'ANKRD9'	mRNA	34.38	40.83	29.99	31.81	32.57	39.51	34.63	35.0667	24.93	30.35	22.02	22.53	23.78	28.89	25.0667	25.7667	2045.98	2563.03	1773	1938	1995	2433	2122	2127.34	-0.0399256	0.725824	0.999443
122481	'AK7'	mRNA	0.06	0.06	0.03	0.03	0.03	0.12	0.06	0.05	0.05	0.04	0.02	0.02	0.02	0.08	0.04	0.0366667	2	2	1	1	1	4	2	1.66667	0.231084	0.867077	0.999443
122509	'IFI27L1'	mRNA	52.49	60.85	47.41	60.77	59.59	56.51	58.9567	53.5833	38.06	45.24	34.81	43.04	43.51	41.31	42.62	39.37	260	325	215	306	282	282	290	266.667	0.081762	0.567604	0.999443
122525	'C14orf28'	mRNA	2.18	1.7	2.22	2.15	1.47	1.27	1.63	2.03333	1.58	1.27	1.63	1.52	1.08	0.93	1.17667	1.49333	32	29	30	40	19	21	26.6667	30.3333	-0.232705	0.534384	0.999443
122553	'TRAPPC6B'	mRNA	8.74	7.46	9.16	10.04	10.45	8.01	9.5	8.45333	6.34	5.55	6.73	7.11	7.63	5.85	6.86333	6.20667	254	190	252	267	255	217	246.333	232	0.0437206	0.770098	0.999443
122616	'CLBA1'	mRNA	11.13	13.77	9.84	12.69	12.14	11.81	12.2133	11.58	8.07	10.24	7.23	8.99	8.87	8.63	8.83	8.51333	259	340	227	301	292	285	292.667	275.333	0.0491762	0.730193	0.999443
122618	'PLD4'	mRNA	0	0.01	0	0.01	0.01	0.05	0.0233333	0.00333333	0	0.01	0	0.01	0.01	0.04	0.02	0.00333333	0	1	0	1	1	2	1.33333	0.333333	1.85893	0.380319	0.999443
122622	'ADSS1'	mRNA	63.94	61.8	56.71	63.95	59.45	65.48	62.96	60.8167	46.36	45.95	41.63	45.29	43.41	47.87	45.5233	44.6467	1040	1065	910	1057	994	1104	1051.67	1005	0.0258851	0.765951	0.999443
122704	'MRPL52'	mRNA	31.54	27.78	36.58	21.18	32.35	30.9	28.1433	31.9667	22.87	20.65	26.86	15	23.62	22.59	20.4033	23.46	220	192	230	176	196	198	190	214	-0.211856	0.155073	0.999443
122706	'PSMB11'	mRNA	0	0	0	0	0	0.05	0.0166667	0	0	0	0	0	0	0.04	0.0133333	0	0	0	0	0	0	1	0.333333	0	0.92125	0.82138	0.999443
122769	'LRR1'	mRNA	14.17	15.34	14.02	16.13	14.36	12.07	14.1867	14.51	10.27	11.4	10.29	11.42	10.49	8.83	10.2467	10.6533	166	190	165	190	179	151	173.333	173.667	-0.0439057	0.778753	0.999443
122773	'KLHDC1'	mRNA	0.11	0.11	0	0.2	0.15	0.07	0.14	0.0733333	0.08	0.08	0	0.14	0.11	0.05	0.1	0.0533333	3	3	0	5	4	2	3.66667	2	0.835202	0.475299	0.999443
122786	'FRMD6'	mRNA	5.07	3.09	4.55	5.22	3.31	3.63	4.05333	4.23667	3.68	2.3	3.34	3.69	2.42	2.66	2.92333	3.10667	159	116	152	137	113	113	121	142.333	-0.277457	0.13141	0.999443
122809	'SOCS4'	mRNA	5.39	4.08	5.69	5.22	4.19	4.22	4.54333	5.05333	3.91	3.03	4.18	3.7	3.06	3.09	3.28333	3.70667	390	314	410	386	314	317	339	371.333	-0.175184	0.181835	0.999443
122830	'NAA30'	mRNA	2.79	2.42	2.92	2.53	2.93	2.88	2.78	2.71	2.02	1.8	2.14	1.79	2.14	2.1	2.01	1.98667	226	209	235	209	245	242	232	223.333	0.0153514	0.913864	0.999443
122945	'NOXRED1'	mRNA	0.24	0.25	0.09	0.5	0.37	0.21	0.36	0.193333	0.17	0.19	0.06	0.35	0.27	0.15	0.256667	0.14	4	4	2	7	6	3	5.33333	3.33333	0.636064	0.485029	0.999443
122953	'JDP2'	mRNA	63.73	69.61	65.38	71.44	85.13	72.75	76.44	66.24	46.21	51.75	48.01	50.6	62.17	53.18	55.3167	48.6567	1055	1229.86	1081	1195	1446	1296	1312.33	1121.95	0.188329	0.0484624	0.999443
122961	'ISCA2'	mRNA	8.1	6.22	8.45	5.39	7.83	7.75	6.99	7.59	5.88	4.63	6.21	3.82	5.72	5.67	5.07	5.57333	181	154	164	140	157	184	160.333	166.333	-0.0918762	0.58172	0.999443
122970	'ACOT4'	mRNA	2.12	2.3	2.01	3.7	2.89	2.48	3.02333	2.14333	1.54	1.71	1.47	2.62	2.11	1.82	2.18333	1.57333	32	37	30	57	45	39	47	33	0.467759	0.126506	0.999443
123	'PLIN2'	mRNA	70.74	68.74	72.6	66.69	56.55	62.6	61.9467	70.6933	51.29	51.11	53.3	47.23	41.3	45.76	44.7633	51.9	1256	1302	1275	1209	1041	1161	1137	1277.67	-0.209631	0.00854735	0.999443
1230	'CCR1'	mRNA	0.11	0.04	0.15	0.15	0.07	0.11	0.11	0.1	0.08	0.03	0.11	0.11	0.05	0.08	0.08	0.0733333	3	1	4	4	2	3	3	2.66667	0.121167	0.913118	0.999443
123016	'TTC8'	mRNA	12.02	10.81	11.59	10.99	11.73	11.91	11.5433	11.4733	8.71	8.04	8.51	7.79	8.57	8.71	8.35667	8.42	266	255	256	253	268	275	265.333	259	-0.00494513	0.969233	0.999443
123036	'TC2N'	mRNA	0.29	0.2	0.31	0.15	0.14	0.14	0.143333	0.266667	0.21	0.15	0.23	0.11	0.1	0.1	0.103333	0.196667	15	11	16	8	7	7	7.33333	14	-0.975787	0.0938333	0.999443
123041	'SLC24A4'	mRNA	0.02	0.01	0	0	0	0	0	0.01	0.01	0.01	0	0	0	0	0	0.00666667	1.71	1	0	0.32	0	0	0.106667	0.903333	-1.88953	0.555899	0.999443
123096	'SLC25A29'	mRNA	29.19	31.09	28.63	24.44	25.32	30.23	26.6633	29.6367	21.16	23.12	21.02	17.31	18.49	22.1	19.3	21.7667	690	791	674	591	627	751	656.333	718.333	-0.168208	0.126326	0.999443
123099	'DEGS2'	mRNA	0.05	0.22	0.16	0.31	0.15	0.15	0.203333	0.143333	0.04	0.17	0.12	0.22	0.11	0.11	0.146667	0.11	2	6	5	7	2	4	4.33333	4.33333	-0.0479251	0.958484	0.999443
123103	'KLHL33'	mRNA	0.06	0.02	0.06	0.02	0.06	0.02	0.0333333	0.0466667	0.04	0.01	0.04	0.02	0.04	0.01	0.0233333	0.03	3.52	0.94	3	1.21	3	1	1.73667	2.48667	-0.304228	0.831274	0.999443
123169	'LEO1'	mRNA	27.9	27.36	30.73	32.4	31.23	30.24	31.29	28.6633	20.23	20.34	22.56	22.95	22.81	22.11	22.6233	21.0433	587	613	639	695	679	660	678	613	0.104334	0.258712	0.999443
1232	'CCR3'	mRNA	0	0.06	0	0.06	0	0.13	0.0633333	0.02	0	0.05	0	0.05	0	0.09	0.0466667	0.0166667	0	1	0	1	0	3	1.33333	0.333333	1.85888	0.405559	0.999443
123207	'C15orf40'	mRNA	20.24	16.47	17.31	13.51	20.59	22.06	18.72	18.0067	14.68	12.25	12.71	9.57	15.04	16.13	13.58	13.2133	977.74	1191.23	865.87	972.4	1067.58	1108.34	1049.44	1011.61	0.0159312	0.881325	0.999443
123228	'SENP8'	mRNA	0.89	0.73	0.78	0.88	0.88	0.5	0.753333	0.8	0.65	0.54	0.57	0.62	0.64	0.36	0.54	0.586667	20	20	17	17	24	19	20	19	0.0360843	0.93246	0.999443
123263	'MTFMT'	mRNA	8.24	7.57	7.39	6.96	8.34	7.61	7.63667	7.73333	5.97	5.63	5.43	4.93	6.09	5.56	5.52667	5.67667	205	193	186	184	201	192	192.333	194.667	-0.0570414	0.694973	0.999443
123264	'SLC51B'	mRNA	0.41	0.52	0.28	0.27	0	0.53	0.266667	0.403333	0.3	0.38	0.21	0.19	0	0.39	0.193333	0.296667	3	4	2	2	0	4	2	3	-0.622767	0.612541	0.999443
123283	'TARS3'	mRNA	2.36	2.76	2.98	2.94	2.78	2.59	2.77	2.7	1.71	2.06	2.19	2.08	2.03	1.89	2	1.98667	77	91	95	94	99	88	93.6667	87.6667	0.0546565	0.790478	0.999443
1233	'CCR4'	mRNA	0	0.03	0.03	0	0	0	0	0.02	0	0.02	0.02	0	0	0	0	0.0133333	0	1	1	0	0	0	0	0.666667	-1.90011	0.552356	0.999443
123346	'HIGD2B'	mRNA	0	0	0	0	0.16	0.15	0.103333	0	0	0	0	0	0.11	0.11	0.0733333	0	0	0	0	0	1	1	0.666667	0	1.83293	0.568707	0.999443
123355	'LRRC28'	mRNA	4.92	5.38	5.22	3.8	6.32	5.95	5.35667	5.17333	3.57	4	3.84	2.69	4.62	4.35	3.88667	3.80333	101.39	117	107.89	97	133	123.99	117.997	108.76	0.0814756	0.6754	0.999443
1235	'CCR6'	mRNA	0.03	0	0	0.06	0	0	0.02	0.01	0.02	0	0	0.04	0	0	0.0133333	0.00666667	1	0	0	2	0	0	0.666667	0.333333	0.8265	0.771879	0.999443
123591	'TMEM266'	mRNA	0.57	0.74	0.66	0.51	0.59	0.71	0.603333	0.656667	0.41	0.55	0.49	0.36	0.43	0.52	0.436667	0.483333	13	18	15	12	14	17	14.3333	15.3333	-0.135301	0.781232	0.999443
123606	'NIPA1'	mRNA	16.69	12.23	15.98	15.87	14.92	14.78	15.19	14.9667	12.1	9.09	11.73	11.24	10.9	10.81	10.9833	10.9733	1160	905	1104	1126	1070	1066	1087.33	1056.33	-0.00013	0.998928	0.999577
123688	'HYKK'	mRNA	7.34	7.91	5.47	4.76	7.7	5.88	6.11333	6.90667	5.32	5.88	4.02	3.37	5.62	4.3	4.43	5.07333	56	60	49.37	42	58	51	50.3333	55.1233	-0.165455	0.537271	0.999443
123720	'WHAMM'	mRNA	6.15	5.83	5.99	6.54	6.32	5.57	6.14333	5.99	4.46	4.34	4.39	4.63	4.61	4.07	4.43667	4.39667	189	174	187	201	192	176	189.667	183.333	0.00751655	0.959358	0.999443
123722	'FSD2'	mRNA	0.01	0	0	0.01	0.03	0	0.0133333	0.00333333	0.01	0	0	0.01	0.02	0	0.01	0.00333333	1	0	0	1	1.99	0	0.996667	0.333333	0.848894	0.750338	0.999443
123775	'C16orf46'	mRNA	2.78	2.62	4.45	3.04	3.68	3.34	3.35333	3.28333	2.02	1.95	3.27	2.15	2.69	2.44	2.42667	2.41333	47	43	68	48	57	54	53	52.6667	-0.0323338	0.907088	0.999443
1238	'ACKR2'	mRNA	0	0	0	0.03	0	0	0.01	0	0	0	0	0.02	0	0	0.00666667	0	0	0	0	1	0	0	0.333333	0	0.92125	0.82138	0.999443
123803	'NTAN1'	mRNA	46.47	43.22	49.7	45.18	45.27	44.12	44.8567	46.4633	33.7	32.14	36.49	32	33.05	32.26	32.4367	34.11	472	468	499	466	477	468	470.333	479.667	-0.0689829	0.500371	0.999443
123811	'CEP20'	mRNA	26.62	19.33	28.9	26.03	24.57	24.3	24.9667	24.95	19.3	14.37	21.22	18.43	17.94	17.76	18.0433	18.2967	567	444	612	568	547	536	550.333	541	-0.0178191	0.880602	0.999443
123872	'DNAAF1'	mRNA	0.53	0.52	0.73	0.75	0.82	1	0.856667	0.593333	0.38	0.39	0.54	0.53	0.6	0.73	0.62	0.436667	12	17	17	21	16	18	18.3333	15.3333	0.215232	0.63868	0.999443
123879	'DCUN1D3'	mRNA	1.28	1.27	1.05	1.34	1.05	1.2	1.19667	1.2	0.93	0.95	0.77	0.95	0.76	0.88	0.863333	0.883333	83	88	68	89	70	81	80	79.6667	-0.0347603	0.874332	0.999443
123904	'NRN1L'	mRNA	0.5	0.94	0.78	1.48	1.21	1.2	1.29667	0.74	0.36	0.7	0.57	1.05	0.89	0.88	0.94	0.543333	2	4	3	6	5	5	5.33333	3	0.788769	0.391396	0.999443
123920	'CMTM3'	mRNA	16.1	14.75	14.5	18.99	14.69	14.28	15.9867	15.1167	11.67	10.97	10.65	13.45	10.73	10.44	11.54	11.0967	295	284	260	350	275	272	299	279.667	0.0540566	0.67958	0.999443
124044	'SPATA2L'	mRNA	10.55	11.86	7.75	9.65	11.17	11.02	10.6133	10.0533	7.65	8.82	5.69	6.84	8.15	8.06	7.68333	7.38667	243	289	177	227	266	265	252.667	236.333	0.0600621	0.709754	0.999443
124045	'SPATA33'	mRNA	29.09	26.8	21.36	25.37	27.58	28.62	27.19	25.75	21.09	19.92	15.68	17.96	20.14	20.92	19.6733	18.8967	351	351	259	314	344	359	339	320.333	0.0440251	0.743003	0.999443
124056	'NOXO1'	mRNA	0.49	0.53	0.57	0.35	0.55	0.48	0.46	0.53	0.36	0.4	0.42	0.25	0.4	0.35	0.333333	0.393333	8	8	8	6	8	7	7	8	-0.231491	0.731111	0.999443
124093	'CCDC78'	mRNA	4.45	4.42	3.9	4.85	2.69	5.13	4.22333	4.25667	3.22	3.28	2.87	3.43	1.97	3.75	3.05	3.12333	57	63	51	66	34	65	55	57	-0.0937965	0.738098	0.999443
1241	'LTB4R'	mRNA	1.97	2.19	1.6	1.76	1.67	1.74	1.72333	1.92	1.43	1.63	1.17	1.25	1.22	1.27	1.24667	1.41	88	102	68	77	77	81	78.3333	86	-0.173197	0.433346	0.999443
124152	'IQCK'	mRNA	2.49	1.93	2.47	2.6	2.46	1.77	2.27667	2.29667	1.81	1.43	1.81	1.84	1.79	1.3	1.64333	1.68333	79	73	87	80	84	65	76.3333	79.6667	-0.103457	0.64204	0.999443
124220	'ZG16B'	mRNA	1.77	0.45	1.31	1.1	0.62	0.46	0.726667	1.17667	1.28	0.34	0.96	0.78	0.46	0.34	0.526667	0.86	11	3	8	7	4	3	4.66667	7.33333	-0.700481	0.381694	0.999443
124222	'PAQR4'	mRNA	60.64	62.95	58.89	64.06	61.16	62.94	62.72	60.8267	43.97	46.8	43.23	45.37	44.66	46.01	45.3467	44.6667	1611	1783	1550	1737	1671	1737	1715	1648	0.0176343	0.814095	0.999443
124245	'ZC3H18'	mRNA	58.25	63.98	61.95	61.03	58.84	61.41	60.4267	61.3933	42.23	47.57	45.49	43.22	42.97	44.89	43.6933	45.0967	1922	2210	1985	2112	2028	2073	2071	2039	-0.0177379	0.808549	0.999443
124359	'CDYL2'	mRNA	33.27	27.94	34.38	34.76	37.17	34.75	35.56	31.8633	24.12	20.77	25.24	24.62	27.14	25.41	25.7233	23.3767	3002	2682	3083	3201	3458	3253	3304	2922.33	0.136544	0.0821277	0.999443
1244	'ABCC2'	mRNA	17.76	15.7	16.64	20.58	16.5	17.9	18.3267	16.7	12.87	11.67	12.22	14.58	12.05	13.08	13.2367	12.2533	1074	1002	996	1271	1018	1121	1136.67	1024	0.108354	0.218898	0.999443
124401	'ANKS3'	mRNA	12.7	15.57	11.52	11.8	11.19	13.93	12.3067	13.2633	9.21	11.58	8.46	8.36	8.17	10.18	8.90333	9.75	305	378	267	294	281	332	302.333	316.667	-0.105143	0.447238	0.999443
124402	'UBALD1'	mRNA	50.04	58.56	52.78	51.21	55.9	56.47	54.5267	53.7933	36.28	43.54	38.75	36.27	40.82	41.28	39.4567	39.5233	611	760	636	637	703	715	685	669	-0.00434498	0.967016	0.999443
124404	'SEPTIN12'	mRNA	0.09	0	0.1	0.09	0.08	0	0.0566667	0.0633333	0.07	0	0.07	0.07	0.06	0	0.0433333	0.0466667	1	0	1	1	1	0	0.666667	0.666667	-0.0515383	0.982071	0.999443
124411	'ZNF720'	mRNA	0.76	1.15	1.13	0.95	1.05	1.04	1.01333	1.01333	0.55	0.86	0.83	0.68	0.77	0.76	0.736667	0.746667	21	34	31	27	30	30	29	28.6667	-0.0228872	0.948967	0.999443
124446	'TMEM219'	mRNA	80.78	77.07	79.89	76.26	74.08	80.29	76.8767	79.2467	58.57	57.3	58.66	54.01	54.09	58.69	55.5967	58.1767	693	675	688	663	646	700	669.667	685.333	-0.0737248	0.419118	0.999443
124454	'EARS2'	mRNA	13.2	14.31	10.16	14.79	12.95	12.07	13.27	12.5567	9.57	10.64	7.46	10.47	9.45	8.82	9.58	9.22333	454	454	363	498	406	423	442.333	423.667	0.0210766	0.857602	0.999443
124491	'TMEM170A'	mRNA	2.65	2.02	3.61	3.06	2.57	2.31	2.64667	2.76	1.92	1.5	2.65	2.17	1.88	1.69	1.91333	2.02333	139.69	113	187.99	164	139	126	143	146.893	-0.0783933	0.686862	0.999443
124512	'METTL23'	mRNA	101.12	94.17	100.71	105.52	95.17	91.69	97.46	98.6667	73.32	70.01	73.94	74.73	69.5	67.03	70.42	72.4233	885	890	876	967	882	859	902.667	883.667	-0.0107242	0.896915	0.999443
124540	'MSI2'	mRNA	17.36	15.36	17.51	17.93	15.39	14.78	16.0333	16.7433	12.59	11.42	12.86	12.7	11.24	10.8	11.58	12.29	994	910	1021	1046	900	862	936	975	-0.101781	0.26751	0.999443
124565	'SLC38A10'	mRNA	75.66	82.44	70.65	87.05	80.16	82.66	83.29	76.25	54.86	61.3	51.87	61.65	58.53	60.42	60.2	56.01	3264	3828	2983	3766	3585	3698	3683	3358.33	0.0938528	0.24505	0.999443
124583	'CANT1'	mRNA	39.14	36.95	39.45	44.2	38.75	38.54	40.4967	38.5133	28.38	27.47	28.96	31.3	28.3	28.17	29.2567	28.27	1356	1365	1362	1567	1388	1394	1449.67	1361	0.0493429	0.510247	0.999443
124590	'USH1G'	mRNA	0.03	0	0.03	0	0.11	0.08	0.0633333	0.02	0.02	0	0.02	0	0.08	0.06	0.0466667	0.0133333	1	0	1	0	4	3	2.33333	0.666667	1.77768	0.304582	0.999443
124637	'CYB5D1'	mRNA	11.38	10.47	11.89	11.7	10.98	9.96	10.88	11.2467	8.25	7.79	8.73	8.29	8.02	7.28	7.86333	8.25667	405	397	419	425	403	367	398.333	407	-0.0726776	0.506741	0.999443
124641	'OVCA2'	mRNA	38.85	45.48	39.52	50.16	44.77	43.03	45.9867	41.2833	28.17	33.81	29.01	35.53	32.69	31.46	33.2267	30.33	329.07	409.25	328.87	432.83	390.96	379.13	400.973	355.73	0.131413	0.270138	0.999443
124739	'USP43'	mRNA	2.65	2.95	2.43	2.35	2.03	2.08	2.15333	2.67667	1.92	2.19	1.79	1.66	1.48	1.52	1.55333	1.96667	113	135	103	103	90	93	95.3333	117	-0.335771	0.0820975	0.999443
124751	'KRBA2'	mRNA	1.09	0.85	1.09	0.89	0.93	0.79	0.87	1.01	0.79	0.63	0.8	0.63	0.68	0.58	0.63	0.74	28	24	29	24	24	20	22.6667	27	-0.294241	0.434613	0.999443
124783	'SPATA32'	mRNA	0	0.09	0	0	0	0	0	0.03	0	0.06	0	0	0	0	0	0.02	0	1	0	0	0	0	0	0.333333	-1.0023	0.805965	0.999443
124790	'HEXIM2'	mRNA	17.24	19.71	15.98	18.75	18.63	22.55	19.9767	17.6433	12.5	14.66	11.73	13.28	13.6	16.49	14.4567	12.9633	218	265	201	233	237	288	252.667	228	0.110169	0.457251	0.999443
124801	'LSM12'	mRNA	50.16	44.74	61.64	47.5	42.23	43.76	44.4967	52.18	36.37	33.27	45.26	33.64	30.84	31.99	32.1567	38.3	1207	1152	1470	1172	1050	1094	1105.33	1276.33	-0.250519	0.0111176	0.999443
124808	'CCDC43'	mRNA	27.74	25.12	27.29	28.88	26.66	25.01	26.85	26.7167	20.11	18.68	20.03	20.46	19.46	18.28	19.4	19.6067	566	545	551	601	561	529	563.667	554	-0.0164374	0.864481	0.999443
124817	'CNTD1'	mRNA	0	0	0	0	0.13	0.03	0.0533333	0	0	0	0	0	0.1	0.02	0.04	0	0	0	0	0	2	1	1	0	2.41819	0.379494	0.999443
124857	'WFIKKN2'	mRNA	0	0	0	0	0.03	0	0.01	0	0	0	0	0	0.02	0	0.00666667	0	0	0	0	0	1	0	0.333333	0	0.92125	0.82138	0.999443
124872	'B4GALNT2'	mRNA	6.2	6.07	7.05	5.78	7.86	7.04	6.89333	6.44	4.49	4.51	5.18	4.09	5.74	5.15	4.99333	4.72667	181	186	199	197	222	219	212.667	188.667	0.132957	0.362464	0.999443
124912	'SPACA3'	mRNA	0	0	0	0	0	0.15	0.05	0	0	0	0	0	0	0.11	0.0366667	0	0	0	0	0	0	1	0.333333	0	0.92125	0.82138	0.999443
124923	'RSKR'	mRNA	0.72	0.82	0.91	0.86	0.65	0.62	0.71	0.816667	0.52	0.61	0.67	0.61	0.47	0.45	0.51	0.6	28	34	35	34	26	25	28.3333	32.3333	-0.233688	0.497923	0.999443
124925	'SEZ6'	mRNA	0	0	0.02	0	0.02	0	0.00666667	0.00666667	0	0	0.02	0	0.02	0	0.00666667	0.00666667	0	0	1	0	1	0	0.333333	0.333333	-0.0405184	0.99005	0.999443
124930	'ANKRD13B'	mRNA	24.38	26.47	23.67	24.23	27.06	27.52	26.27	24.84	17.67	19.68	17.38	17.16	19.76	20.11	19.01	18.2433	874	1001	846	891	1002	1010	967.667	907	0.0551995	0.562144	0.999443
124935	'SLC43A2'	mRNA	6.26	7.05	6.17	6.83	6.6	5.96	6.46333	6.49333	4.54	5.24	4.53	4.84	4.82	4.36	4.67333	4.77	556.64	662.39	543.72	618.6	601.21	548.03	589.28	587.583	-0.0353018	0.731439	0.999443
124936	'CYB5D2'	mRNA	28.35	28.68	26.67	33	31.86	31.36	32.0733	27.9	20.56	21.32	19.58	23.37	23.27	22.92	23.1867	20.4867	401	412	350	478	476	447	467	387.667	0.228649	0.0346031	0.999443
124944	'C17orf49'	mRNA	59.98	67.08	53.58	54.23	57.76	58.37	56.7867	60.2133	43.49	49.87	39.34	38.41	42.18	42.67	41.0867	44.2333	383	456	338	356	382	391	376.333	392.333	-0.0981985	0.427976	0.999443
124975	'GGT6'	mRNA	0.05	0	0.09	0	0	0	0	0.0466667	0.04	0	0.07	0	0	0	0	0.0366667	1	0	2	0	0	0	0	1	-2.4937	0.360944	0.999443
124976	'SPNS2'	mRNA	0.46	0.76	0.46	0.17	0.31	0.61	0.363333	0.56	0.33	0.56	0.34	0.12	0.22	0.45	0.263333	0.41	16	28	16	6	11	22	13	20	-0.652855	0.208293	0.999443
124989	'EFCAB13'	mRNA	0.03	0.05	0.03	0.05	0	0.03	0.0266667	0.0366667	0.02	0.04	0.02	0.04	0	0.02	0.02	0.0266667	1	2	1	2	0	1	1	1.33333	-0.464061	0.789288	0.999443
124995	'MRPL10'	mRNA	91.02	92.69	96.22	88.8	97.11	98.84	94.9167	93.31	66	68.91	70.64	62.89	70.91	72.25	68.6833	68.5167	1495	1619	1562	1487	1644	1686	1605.67	1558.67	0.0038748	0.962493	0.999443
124997	'WDR81'	mRNA	11.91	13.2	10.8	13.86	11.93	12.57	12.7867	11.97	8.64	9.81	7.93	9.82	8.71	9.19	9.24	8.79333	781	874	707	873	829	850	850.667	787.333	0.0718928	0.434256	0.999443
125058	'TBC1D16'	mRNA	19.43	19.76	15.48	17.49	18.02	18.31	17.94	18.2233	14.09	14.69	11.37	12.39	13.16	13.38	12.9767	13.3833	1867	1919	1798	1829	1863	1848	1846.67	1861.33	-0.0512717	0.461731	0.999443
125061	'AFMID'	mRNA	25.49	23.58	24.52	23.45	24.42	21.79	23.22	24.53	18.48	17.53	18	16.61	17.83	15.93	16.79	18.0033	335	331	318	312	325	297	311.333	328	-0.115485	0.325924	0.999443
125111	'GJD3'	mRNA	0.02	0.04	0.05	0	0.07	0	0.0233333	0.0366667	0.02	0.03	0.04	0	0.05	0	0.0166667	0.03	1	2	2	0	3	0	1	1.66667	-0.76649	0.654537	0.999443
125113	'KRT222'	mRNA	0	0	0.04	0	0	0	0	0.0133333	0	0	0.03	0	0	0	0	0.01	0	0	1	0	0	0	0	0.333333	-1.0023	0.805965	0.999443
125150	'ZSWIM7'	mRNA	4.07	3.44	4.41	3.88	3.82	3.83	3.84333	3.97333	2.95	2.56	3.24	2.75	2.79	2.8	2.78	2.91667	75	67	81	73	73	73	73	74.3333	-0.0673461	0.763951	0.999443
125170	'MIEF2'	mRNA	6.96	6.68	4.83	6.11	5.93	6.16	6.06667	6.15667	5.04	4.97	3.54	4.33	4.33	4.51	4.39	4.51667	194	197	132	162	172	185	173	174.333	-0.0486314	0.775855	0.999443
125206	'SLC5A10'	mRNA	1.21	0.5	0.74	0.75	1.07	1.35	1.05667	0.816667	0.88	0.37	0.55	0.53	0.78	0.99	0.766667	0.6	35	16	18	26	32	37	31.6667	23	0.423746	0.279966	0.999443
125228	'FAM210A'	mRNA	6.7	5.73	7.05	5.85	5.89	5.58	5.77333	6.49333	4.86	4.26	5.18	4.14	4.3	4.08	4.17333	4.76667	293	267	306	261	266	253	260	288.667	-0.191988	0.132787	0.999443
125476	'INO80C'	mRNA	30.88	32.5	33.38	36.62	33.32	31.49	33.81	32.2533	22.39	24.17	24.51	25.93	24.33	23.02	24.4267	23.69	234	261	246	281	259	248	262.667	247	0.0475313	0.713353	0.999443
125488	'TTC39C'	mRNA	79.24	78.95	75.6	81.82	89	93.67	88.1633	77.93	57.46	58.7	55.51	57.94	64.99	68.47	63.8	57.2233	888	853	882	955	988	973	972	874.333	0.112504	0.176278	0.999443
1258	'CNGB1'	mRNA	2.73	2.72	2.29	2.34	2.17	2.59	2.36667	2.58	1.98	2.03	1.68	1.66	1.58	1.89	1.71	1.89667	141	149	117	123	115	138	125.333	135.667	-0.153432	0.388613	0.999443
125875	'CLDND2'	mRNA	2.07	2.84	2.26	2.75	2.35	2.98	2.69333	2.39	1.5	2.11	1.66	1.95	1.72	2.18	1.95	1.75667	27	41	30	38	33	42	37.6667	32.6667	0.165983	0.610639	0.999443
125893	'ZNF816'	mRNA	1.92	1.61	1.91	1.97	1.95	2.15	2.02333	1.81333	1.39	1.2	1.4	1.4	1.42	1.57	1.46333	1.33	49.63	44	48	51.09	51	57	53.03	47.21	0.133048	0.619861	0.999443
125919	'ZNF543'	mRNA	0.7	0.73	0.4	0.7	0.74	0.51	0.65	0.61	0.51	0.55	0.29	0.5	0.54	0.37	0.47	0.45	26.61	29.55	15.09	27.07	29	20.05	25.3733	23.75	0.0800488	0.840326	0.999443
125931	'CEACAM20'	mRNA	0	0	0.06	0	0	0	0	0.02	0	0	0.04	0	0	0	0	0.0133333	0	0	1	0	0	0	0	0.333333	-1.0023	0.805965	0.999443
125950	'RAVER1'	mRNA	39.91	42.17	43.37	44.04	43.28	42.01	43.11	41.8167	28.94	31.35	31.84	31.19	31.61	30.71	31.17	30.71	1415	1593	1527	1594	1585	1547	1575.33	1511.67	0.0190542	0.80109	0.999443
125965	'COX6B2'	mRNA	2.98	3.27	2.25	1.93	3.02	2.92	2.62333	2.83333	2.16	2.43	1.65	1.37	2.2	2.13	1.9	2.08	51	64.93	39	33	52.98	54.03	46.67	51.6433	-0.182305	0.540317	0.999443
125972	'CALR3'	mRNA	0	0	0	0.09	0	0	0.03	0	0	0	0	0.06	0	0	0.02	0	0	0	0	1	0	0	0.333333	0	0.92125	0.82138	0.999443
125981	'ACER1'	mRNA	0	0.07	0	0	0	0	0	0.0233333	0	0.05	0	0	0	0	0	0.0166667	0	1	0	0	0	0	0	0.333333	-1.0023	0.805965	0.999443
125988	'MICOS13'	mRNA	132.02	142.53	121.36	150.85	154.88	128.75	144.827	131.97	95.73	105.97	89.1	106.83	113.1	94.12	104.683	96.9333	379	432	340	438	463	392	431	383.667	0.128361	0.277629	0.999443
[truncated: 13,673 more rows]
